# Supplementary material for: Two-sample Mendelian randomization analysis of 91 circulating inflammatory protein levels and amyotrophic lateral sclerosis
Source: Front Aging Neurosci. 2024 Mar 27;16:1367106. doi: 10.3389/fnagi.2024.1367106 (PMC11004327; doi:10.3389/fnagi.2024.1367106)
Supplement: Supplementary file 1 [file Table_1.XLSX]

## Sheet: content
content	Supplementary table
Data Sources	S1
The two-sample Mendelian randomization positive results	S2
Results of Forward Mendelian Randomization Analysis between 91 inflammatory proteins and ALS (snp p<5e-8)	S3
Results of Forward Mendelian Randomization Analysis between 91 inflammatory proteins and ALS (snp p<5e-7)	S4
Results of Forward Mendelian Randomization Analysis between 91 inflammatory proteins and ALS (snp p<5e-6)	S5
Results of Reverse Mendelian Randomization Analysis between 91 inflammatory proteins and ALS	S6
Exclude rs112665079 and reperform the Mendelian randomization analysis	S7
Details of Forward Mendelian randomization snp (p<5e-8)	S8
Details of Forward Mendelian randomization snp (p<5e-7)	S9
Details of Forward Mendelian randomization snp (p<5e-6)	S10
Details of Reverse Mendelian randomization snp	S11

## Sheet: S1
Data Sources
TRIT	PMID/Source	Year	Samplesize	Ancestry
91 circulating inflammatory proteins	37563310	2023	14824	EUR
Amyotrophic lateral sclerosis	34873335	2021	138086	EUR
91 details of circulating inflammatory proteins
First author	Study accession	Reported trait	Discovery sample number	Replication sample number
Zhao JH	GCST90274783	C-X-C motif chemokine 6 levels	• 14744 European	• 1585 European, NR
Zhao JH	GCST90274759	Adenosine Deaminase levels	• 14736 European	• 1585 European, NR
Zhao JH	GCST90274785	Delta and Notch-like epidermal growth factor-related receptor levels	• 14735 European	• 1585 European, NR
Zhao JH	GCST90274761	Axin-1 levels	• 11793 European	• 1585 European, NR
Zhao JH	GCST90274787	Fibroblast growth factor 19 levels	• 14744 European	• 1585 European, NR
Zhao JH	GCST90274788	Fibroblast growth factor 21 levels	• 14743 European	• 1585 European, NR
Zhao JH	GCST90274764	Eotaxin levels	• 14734 European	• 1585 European, NR
Zhao JH	GCST90274765	C-C motif chemokine 19 levels	• 14736 European	• 1585 European, NR
Zhao JH	GCST90274766	C-C motif chemokine 20 levels	• 14736 European	• 1585 European, NR
Zhao JH	GCST90274767	C-C motif chemokine 23 levels	• 14736 European	• 1585 European, NR
Zhao JH	GCST90274768	C-C motif chemokine 25 levels	• 14736 European	• 1585 European, NR
Zhao JH	GCST90274794	Interferon gamma levels	• 11793 European	• 1585 European, NR
Zhao JH	GCST90274795	Interleukin-10 levels	• 14744 European	• 1585 European, NR
Zhao JH	GCST90274771	Natural killer cell receptor 2B4 levels	• 14735 European	• 1585 European, NR
Zhao JH	GCST90274772	CD40L receptor levels	• 14736 European	• 1585 European, NR
Zhao JH	GCST90274773	T-cell surface glycoprotein CD5 levels	• 14735 European	• 1585 European, NR
Zhao JH	GCST90274774	T-cell surface glycoprotein CD6 isoform levels	• 14735 European	• 1585 European, NR
Zhao JH	GCST90274775	CUB domain-containing protein 1 levels	• 14734 European	• 1585 European, NR
Zhao JH	GCST90274801	Interleukin-17A levels	• 11784 European	• 1585 European, NR
Zhao JH	GCST90274777	Cystatin D levels	• 14736 European	• 1585 European, NR
Zhao JH	GCST90274778	Fractalkine levels	• 14743 European	• 1585 European, NR
Zhao JH	GCST90274804	interleukin-18 receptor 1 levels	• 14743 European	• 1585 European, NR
Zhao JH	GCST90274780	C-X-C motif chemokine 10 levels	• 14744 European	• 1585 European, NR
Zhao JH	GCST90274781	C-X-C motif chemokine 11 levels	• 14736 European	• 1585 European, NR
Zhao JH	GCST90274758	Eukaryotic translation initiation factor 4E-binding protein 1 levels	• 14736 European	• 1585 European, NR
Zhao JH	GCST90274784	C-X-C motif chemokine 9 levels	• 14735 European	• 1585 European, NR
Zhao JH	GCST90274760	Artemin levels	• 11778 European	• 1585 European, NR
Zhao JH	GCST90274786	Protein S100-A12 levels	• 14743 European	• 1585 European, NR
Zhao JH	GCST90274762	beta-nerve growth factor levels	• 14743 European	• 1585 European, NR
Zhao JH	GCST90274763	Caspase 8 levels	• 14744 European	• 1585 European, NR
Zhao JH	GCST90274789	Fibroblast growth factor 23 levels	• 14735 European	• 1585 European, NR
Zhao JH	GCST90274790	Fibroblast growth factor 5 levels	• 11789 European	• 1585 European, NR
Zhao JH	GCST90274791	Fms-related tyrosine kinase 3 ligand levels	• 14734 European	• 1585 European, NR
Zhao JH	GCST90274792	Glial cell line-derived neurotrophic factor levels	• 14736 European	• 1585 European, NR
Zhao JH	GCST90274793	Hepatocyte growth factor levels	• 14734 European	• 1585 European, NR
Zhao JH	GCST90274769	C-C motif chemokine 28 levels	• 14734 European	• 1585 European, NR
Zhao JH	GCST90274770	C-C motif chemokine 4 levels	• 14744 European	• 1585 European, NR
Zhao JH	GCST90274796	Interleukin-10 receptor subunit alpha levels	• 11793 European	• 1585 European, NR
Zhao JH	GCST90274797	Interleukin-10 receptor subunit beta levels	• 14734 European	• 1585 European, NR
Zhao JH	GCST90274798	Interleukin-12 subunit beta levels	• 14735 European	• 1585 European, NR
Zhao JH	GCST90274799	Interleukin-13 levels	• 11792 European	• 1585 European, NR
Zhao JH	GCST90274800	Interleukin-15 receptor subunit alpha levels	• 11792 European	• 1585 European, NR
Zhao JH	GCST90274776	Macrophage colony-stimulating factor 1 levels	• 14734 European	• 1585 European, NR
Zhao JH	GCST90274802	Interleukin-17C levels	• 11793 European	• 1585 European, NR
Zhao JH	GCST90274803	Interleukin-18 levels	• 14744 European	• 1585 European, NR
Zhao JH	GCST90274779	C-X-C motif chemokine 1 levels	• 14736 European	• 1585 European, NR
Zhao JH	GCST90274805	Interleukin-1-alpha levels	• 11788 European	• 1585 European, NR
Zhao JH	GCST90274806	Interleukin-2 levels	• 11789 European	• 1585 European, NR
Zhao JH	GCST90274807	Interleukin-20 levels	• 11784 European	• 1585 European, NR
Zhao JH	GCST90274782	C-X-C motif chemokine 5 levels	• 14736 European	• 1585 European, NR
Zhao JH	GCST90274808	Interleukin-20 receptor subunit alpha levels	• 11792 European	• 1585 European, NR
Zhao JH	GCST90274809	Interleukin-22 receptor subunit alpha-1 levels	• 11793 European	• 1585 European, NR
Zhao JH	GCST90274810	Interleukin-24 levels	• 11785 European	• 1585 European, NR
Zhao JH	GCST90274811	Interleukin-2 receptor subunit beta levels	• 11792 European	• 1585 European, NR
Zhao JH	GCST90274812	Interleukin-33 levels	• 11793 European	• 1585 European, NR
Zhao JH	GCST90274813	Interleukin-4 levels	• 11793 European	• 1585 European, NR
Zhao JH	GCST90274814	Interleukin-5 levels	• 11792 European	• 1585 European, NR
Zhao JH	GCST90274815	Interleukin-6 levels	• 14743 European	• 1585 European, NR
Zhao JH	GCST90274816	Interleukin-7 levels	• 14736 European	• 1585 European, NR
Zhao JH	GCST90274817	Interleukin-8 levels	• 14744 European	• 1585 European, NR
Zhao JH	GCST90274818	Latency-associated peptide transforming growth factor beta 1 levels	• 14736 European	• 1585 European, NR
Zhao JH	GCST90274819	Leukemia inhibitory factor levels	• 11793 European	• 1585 European, NR
Zhao JH	GCST90274820	Leukemia inhibitory factor receptor levels	• 11784 European	• 1585 European, NR
Zhao JH	GCST90274821	Monocyte chemoattractant protein-1 levels	• 14733 European	• 1585 European, NR
Zhao JH	GCST90274822	Monocyte chemoattractant protein 2 levels	• 14736 European	• 1585 European, NR
Zhao JH	GCST90274823	Monocyte chemoattractant protein-3 levels	• 11783 European	• 1585 European, NR
Zhao JH	GCST90274824	Monocyte chemoattractant protein-4 levels	• 14736 European	• 1585 European, NR
Zhao JH	GCST90274825	Macrophage inflammatory protein 1a levels	• 14743 European	• 1585 European, NR
Zhao JH	GCST90274826	Matrix metalloproteinase-1 levels	• 14744 European	• 1585 European, NR
Zhao JH	GCST90274827	Matrix metalloproteinase-10 levels	• 14744 European	• 1585 European, NR
Zhao JH	GCST90274828	Neurturin levels	• 11791 European	• 1585 European, NR
Zhao JH	GCST90274829	Neurotrophin-3 levels	• 14744 European	• 1585 European, NR
Zhao JH	GCST90274830	Osteoprotegerin levels	• 14733 European	• 1585 European, NR
Zhao JH	GCST90274831	Oncostatin-M levels	• 14736 European	• 1585 European, NR
Zhao JH	GCST90274832	Programmed cell death 1 ligand 1 levels	• 14736 European	• 1585 European, NR
Zhao JH	GCST90274833	Stem cell factor levels	• 14736 European	• 1585 European, NR
Zhao JH	GCST90274834	SIR2-like protein 2 levels	• 14736 European	• 1585 European, NR
Zhao JH	GCST90274835	Signaling lymphocytic activation molecule levels	• 14734 European	• 1585 European, NR
Zhao JH	GCST90274836	Sulfotransferase 1A1 levels	• 11793 European	• 1585 European, NR
Zhao JH	GCST90274837	STAM binding protein levels	• 14736 European	• 1585 European, NR
Zhao JH	GCST90274838	Transforming growth factor-alpha levels	• 14733 European	• 1585 European, NR
Zhao JH	GCST90274839	Tumor necrosis factor levels	• 11785 European	• 1585 European, NR
Zhao JH	GCST90274840	TNF-beta levels	• 11792 European	• 1585 European, NR
Zhao JH	GCST90274841	Tumor necrosis factor receptor superfamily member 9 levels	• 11784 European	• 1585 European, NR
Zhao JH	GCST90274842	Tumor necrosis factor ligand superfamily member 14 levels	• 11793 European	• 1585 European, NR
Zhao JH	GCST90274843	TNF-related apoptosis-inducing ligand levels	• 14735 European	• 1585 European, NR
Zhao JH	GCST90274844	TNF-related activation-induced cytokine levels	• 14736 European	• 1585 European, NR
Zhao JH	GCST90274845	Thymic stromal lymphopoietin levels	• 11793 European	• 1585 European, NR
Zhao JH	GCST90274846	Tumor necrosis factor ligand superfamily member 12 levels	• 14736 European	• 1585 European, NR
Zhao JH	GCST90274847	Urokinase-type plasminogen activator levels	• 14734 European	• 1585 European, NR
Zhao JH	GCST90274848	Vascular endothelial growth factor A levels	• 14744 European	• 1585 European, NR

## Sheet: S2
The two-sample Mendelian randomization positive results with inflammatory proteins as exposures and ALS as outcomes.
SNP（P < 5×10 -8）
	id.exposure	id.outcome	outcome	exposure	method	nsnp	b	se	pval	OR	lower	upper	Q	Q_df	Q_pval(MR Egger)	egger_intercept	pval(egger_intercept)	p mr_presso
1	Adenosine Deaminase levels	ebi-a-GCST90027164	Amyotrophic lateral sclerosis || id:ebi-a-GCST90027164	90274759	MR Egger	4	0.0770051	0.0590483	0.322092	1.08005	0.962011	1.21257	5.65808	2	0.0590694	-0.00759728	0.806223	0.361
2	Adenosine Deaminase levels	ebi-a-GCST90027164	Amyotrophic lateral sclerosis || id:ebi-a-GCST90027164	90274759	Weighted median	4	0.0777484	0.0286423	0.00663836	1.08085	1.02184	1.14326	5.65808	2	0.0590694	-0.00759728	0.806223	0.361
3	Adenosine Deaminase levels	ebi-a-GCST90027164	Amyotrophic lateral sclerosis || id:ebi-a-GCST90027164	90274759	Inverse variance weighted	4	0.0646909	0.0326959	0.047865	1.06683	1.00061	1.13743	5.65808	2	0.0590694	-0.00759728	0.806223	0.361
4	Adenosine Deaminase levels	ebi-a-GCST90027164	Amyotrophic lateral sclerosis || id:ebi-a-GCST90027164	90274759	Simple mode	4	-0.0196699	0.0676371	0.790138	0.980522	0.858783	1.11952	5.65808	2	0.0590694	-0.00759728	0.806223	0.361
5	Adenosine Deaminase levels	ebi-a-GCST90027164	Amyotrophic lateral sclerosis || id:ebi-a-GCST90027164	90274759	Weighted mode	4	0.100125	0.0296104	0.0430461	1.10531	1.04299	1.17136	5.65808	2	0.0590694	-0.00759728	0.806223	0.361
6	Oncostatin-M levels	ebi-a-GCST90027164	Amyotrophic lateral sclerosis || id:ebi-a-GCST90027164	90274831	MR Egger	4	-0.00790869	0.2759	0.979735	0.992123	0.577716	1.70379	0.359068	2	0.835659	-0.0191655	0.595814	0.864
7	Oncostatin-M levels	ebi-a-GCST90027164	Amyotrophic lateral sclerosis || id:ebi-a-GCST90027164	90274831	Weighted median	4	-0.14853	0.08252	0.071872	0.861974	0.73325	1.0133	0.359068	2	0.835659	-0.0191655	0.595814	0.864
8	Oncostatin-M levels	ebi-a-GCST90027164	Amyotrophic lateral sclerosis || id:ebi-a-GCST90027164	90274831	Inverse variance weighted	4	-0.17429	0.0723636	0.016017	0.840053	0.72897	0.968064	0.359068	2	0.835659	-0.0191655	0.595814	0.864
9	Oncostatin-M levels	ebi-a-GCST90027164	Amyotrophic lateral sclerosis || id:ebi-a-GCST90027164	90274831	Simple mode	4	-0.157677	0.1097	0.246173	0.854126	0.68888	1.05901	0.359068	2	0.835659	-0.0191655	0.595814	0.864
10	Oncostatin-M levels	ebi-a-GCST90027164	Amyotrophic lateral sclerosis || id:ebi-a-GCST90027164	90274831	Weighted mode	4	-0.146966	0.0911226	0.205178	0.863323	0.722118	1.03214	0.359068	2	0.835659	-0.0191655	0.595814	0.864
11	Leukemia inhibitory factor receptor levels	ebi-a-GCST90027164	Amyotrophic lateral sclerosis || id:ebi-a-GCST90027164	90274820	MR Egger	3	-0.116892	0.121068	0.511172	0.889681	0.701744	1.12795	2.06387	1	0.150827	0.00323783	0.912886	#N/A
12	Leukemia inhibitory factor receptor levels	ebi-a-GCST90027164	Amyotrophic lateral sclerosis || id:ebi-a-GCST90027164	90274820	Weighted median	3	-0.092873	0.0443006	0.0360445	0.911309	0.835519	0.993975	2.06387	1	0.150827	0.00323783	0.912886	#N/A
13	Leukemia inhibitory factor receptor levels	ebi-a-GCST90027164	Amyotrophic lateral sclerosis || id:ebi-a-GCST90027164	90274820	Inverse variance weighted	3	-0.102407	0.0427793	0.0166727	0.902662	0.830062	0.981612	2.06387	1	0.150827	0.00323783	0.912886	#N/A
14	Leukemia inhibitory factor receptor levels	ebi-a-GCST90027164	Amyotrophic lateral sclerosis || id:ebi-a-GCST90027164	90274820	Simple mode	3	-0.0588159	0.0686789	0.482012	0.94288	0.82413	1.07874	2.06387	1	0.150827	0.00323783	0.912886	#N/A
15	Leukemia inhibitory factor receptor levels	ebi-a-GCST90027164	Amyotrophic lateral sclerosis || id:ebi-a-GCST90027164	90274820	Weighted mode	3	-0.077563	0.0473296	0.242926	0.925369	0.843387	1.01532	2.06387	1	0.150827	0.00323783	0.912886	#N/A
16	Interleukin-17C levels	ebi-a-GCST90027164	Amyotrophic lateral sclerosis || id:ebi-a-GCST90027164	90274802	Inverse variance weighted	2	0.181139	0.091331	0.0473315	1.19858	1.00213	1.43354	#N/A	#N/A	#N/A	NA	NA	#N/A
SNP（P < 5×10 -7）
	id.exposure	id.outcome	outcome	exposure	method	nsnp	b	se	pval	OR	lower	upper	Q	Q_df	Q_pval(MR Egger)	egger_intercept	pval(egger_intercept)	p mr_presso
1	Interleukin-5 levels	ebi-a-GCST90027164	Amyotrophic lateral sclerosis || id:ebi-a-GCST90027164	90274814	Wald ratio	1	0.405229	0.16732	0.0154407	1.49965	1.08035	2.08168	#N/A	#N/A	#N/A	#N/A	#N/A	#N/A
2	SIR2-like protein 2 levels	ebi-a-GCST90027164	Amyotrophic lateral sclerosis || id:ebi-a-GCST90027164	90274834	Inverse variance weighted	2	0.215194	0.0952021	0.0237973	1.2401	1.02901	1.4945	#N/A	#N/A	#N/A	NA	NA	#N/A
3	Neurturin levels	ebi-a-GCST90027164	Amyotrophic lateral sclerosis || id:ebi-a-GCST90027164	90274828	Inverse variance weighted	2	0.212628	0.103501	0.0399402	1.23692	1.00981	1.51511	#N/A	#N/A	#N/A	NA	NA	#N/A
4	Leukemia inhibitory factor receptor levels	ebi-a-GCST90027164	Amyotrophic lateral sclerosis || id:ebi-a-GCST90027164	90274820	MR Egger	4	-0.129335	0.101383	0.330189	0.878679	0.72033	1.07184	2.9662	2	0.226933	0.00804087	0.712724	0.566
5	Leukemia inhibitory factor receptor levels	ebi-a-GCST90027164	Amyotrophic lateral sclerosis || id:ebi-a-GCST90027164	90274820	Weighted median	4	-0.0824503	0.0449228	0.0664494	0.920857	0.843244	1.00561	2.9662	2	0.226933	0.00804087	0.712724	0.566
6	Leukemia inhibitory factor receptor levels	ebi-a-GCST90027164	Amyotrophic lateral sclerosis || id:ebi-a-GCST90027164	90274820	Inverse variance weighted	4	-0.0917655	0.0420431	0.0290611	0.912319	0.840154	0.990683	2.9662	2	0.226933	0.00804087	0.712724	0.566
7	Leukemia inhibitory factor receptor levels	ebi-a-GCST90027164	Amyotrophic lateral sclerosis || id:ebi-a-GCST90027164	90274820	Simple mode	4	-0.0439722	0.0799626	0.620675	0.956981	0.818159	1.11936	2.9662	2	0.226933	0.00804087	0.712724	0.566
8	Leukemia inhibitory factor receptor levels	ebi-a-GCST90027164	Amyotrophic lateral sclerosis || id:ebi-a-GCST90027164	90274820	Weighted mode	4	-0.0805141	0.049361	0.201361	0.922642	0.837561	1.01637	2.9662	2	0.226933	0.00804087	0.712724	0.566
9	Osteoprotegerin levels	ebi-a-GCST90027164	Amyotrophic lateral sclerosis || id:ebi-a-GCST90027164	90274830	MR Egger	11	-0.113608	0.122049	0.37623	0.892608	0.7027	1.13384	16.1628	9	0.0635597	-0.000369121	0.97902	0.118
10	Osteoprotegerin levels	ebi-a-GCST90027164	Amyotrophic lateral sclerosis || id:ebi-a-GCST90027164	90274830	Weighted median	11	-0.146028	0.0575914	0.0112257	0.864133	0.771894	0.967394	16.1628	9	0.0635597	-0.000369121	0.97902	0.118
11	Osteoprotegerin levels	ebi-a-GCST90027164	Amyotrophic lateral sclerosis || id:ebi-a-GCST90027164	90274830	Inverse variance weighted	11	-0.116582	0.0502047	0.020226	0.889957	0.806555	0.981984	16.1628	9	0.0635597	-0.000369121	0.97902	0.118
12	Osteoprotegerin levels	ebi-a-GCST90027164	Amyotrophic lateral sclerosis || id:ebi-a-GCST90027164	90274830	Simple mode	11	-0.212813	0.110251	0.0824	0.808308	0.651222	1.00329	16.1628	9	0.0635597	-0.000369121	0.97902	0.118
13	Osteoprotegerin levels	ebi-a-GCST90027164	Amyotrophic lateral sclerosis || id:ebi-a-GCST90027164	90274830	Weighted mode	11	-0.112651	0.0656699	0.117034	0.893462	0.785556	1.01619	16.1628	9	0.0635597	-0.000369121	0.97902	0.118
14	Adenosine Deaminase levels	ebi-a-GCST90027164	Amyotrophic lateral sclerosis || id:ebi-a-GCST90027164	90274759	MR Egger	5	0.0601824	0.04586	0.280791	1.06203	0.970734	1.16191	6.65378	3	0.0837911	0.00410919	0.820178	0.339
15	Adenosine Deaminase levels	ebi-a-GCST90027164	Amyotrophic lateral sclerosis || id:ebi-a-GCST90027164	90274759	Weighted median	5	0.0790274	0.0272648	0.0037494	1.08223	1.02592	1.14164	6.65378	3	0.0837911	0.00410919	0.820178	0.339
16	Adenosine Deaminase levels	ebi-a-GCST90027164	Amyotrophic lateral sclerosis || id:ebi-a-GCST90027164	90274759	Inverse variance weighted	5	0.0676825	0.0301559	0.0248054	1.07003	1.00861	1.13518	6.65378	3	0.0837911	0.00410919	0.820178	0.339
17	Adenosine Deaminase levels	ebi-a-GCST90027164	Amyotrophic lateral sclerosis || id:ebi-a-GCST90027164	90274759	Simple mode	5	0.0156784	0.0623057	0.813722	1.0158	0.899028	1.14774	6.65378	3	0.0837911	0.00410919	0.820178	0.339
18	Adenosine Deaminase levels	ebi-a-GCST90027164	Amyotrophic lateral sclerosis || id:ebi-a-GCST90027164	90274759	Weighted mode	5	0.0861971	0.0292549	0.0421191	1.09002	1.02928	1.15435	6.65378	3	0.0837911	0.00410919	0.820178	0.339
SNP（P < 5×10 -6）
	id.exposure	id.outcome	outcome	exposure	method	nsnp	b	se	pval	OR	lower	upper	Q	Q_df	Q_pval(MR Egger)	egger_intercept	pval(egger_intercept)	p mr_presso
1	TNF-beta levels	ebi-a-GCST90027164	Amyotrophic lateral sclerosis || id:ebi-a-GCST90027164	90274840	MR Egger	30	-0.032214	0.0316869	0.318032	0.968299	0.909991	1.03034	34.5181	28	0.184333	-0.00538301	0.454013	0.723
2	TNF-beta levels	ebi-a-GCST90027164	Amyotrophic lateral sclerosis || id:ebi-a-GCST90027164	90274840	Weighted median	30	-0.034514	0.0254539	0.175117	0.966075	0.91906	1.01549	34.5181	28	0.184333	-0.00538301	0.454013	0.723
3	TNF-beta levels	ebi-a-GCST90027164	Amyotrophic lateral sclerosis || id:ebi-a-GCST90027164	90274840	Inverse variance weighted	30	-0.0507038	0.0201268	0.0117617	0.95056	0.913792	0.988808	34.5181	28	0.184333	-0.00538301	0.454013	0.723
4	TNF-beta levels	ebi-a-GCST90027164	Amyotrophic lateral sclerosis || id:ebi-a-GCST90027164	90274840	Simple mode	30	-0.0219576	0.0495378	0.660875	0.978282	0.887762	1.07803	34.5181	28	0.184333	-0.00538301	0.454013	0.723
5	TNF-beta levels	ebi-a-GCST90027164	Amyotrophic lateral sclerosis || id:ebi-a-GCST90027164	90274840	Weighted mode	30	-0.0363098	0.0238299	0.138415	0.964342	0.920336	1.01045	34.5181	28	0.184333	-0.00538301	0.454013	0.723
6	Adenosine Deaminase levels	ebi-a-GCST90027164	Amyotrophic lateral sclerosis || id:ebi-a-GCST90027164	90274759	MR Egger	14	0.0604707	0.0422621	0.177996	1.06234	0.977885	1.15408	29.2245	12	0.00364852	0.00328289	0.734957	0.389
7	Adenosine Deaminase levels	ebi-a-GCST90027164	Amyotrophic lateral sclerosis || id:ebi-a-GCST90027164	90274759	Weighted median	14	0.0754451	0.0281202	0.0072976	1.07836	1.02054	1.13947	29.2245	12	0.00364852	0.00328289	0.734957	0.389
8	Adenosine Deaminase levels	ebi-a-GCST90027164	Amyotrophic lateral sclerosis || id:ebi-a-GCST90027164	90274759	Inverse variance weighted	14	0.0690681	0.0330343	0.0365464	1.07151	1.00433	1.14318	29.2245	12	0.00364852	0.00328289	0.734957	0.389
9	Adenosine Deaminase levels	ebi-a-GCST90027164	Amyotrophic lateral sclerosis || id:ebi-a-GCST90027164	90274759	Simple mode	14	-0.0262616	0.0641915	0.689117	0.97408	0.858922	1.10468	29.2245	12	0.00364852	0.00328289	0.734957	0.389
10	Adenosine Deaminase levels	ebi-a-GCST90027164	Amyotrophic lateral sclerosis || id:ebi-a-GCST90027164	90274759	Weighted mode	14	0.0873434	0.0276193	0.00749059	1.09127	1.03377	1.15197	29.2245	12	0.00364852	0.00328289	0.734957	0.389
11	Osteoprotegerin levels	ebi-a-GCST90027164	Amyotrophic lateral sclerosis || id:ebi-a-GCST90027164	90274830	MR Egger	21	-0.148759	0.0878281	0.106644	0.861777	0.725494	1.02366	27.9153	19	0.085073	0.00771154	0.439993	0.125
12	Osteoprotegerin levels	ebi-a-GCST90027164	Amyotrophic lateral sclerosis || id:ebi-a-GCST90027164	90274830	Weighted median	21	-0.0660078	0.0521988	0.206034	0.936124	0.845086	1.03697	27.9153	19	0.085073	0.00771154	0.439993	0.125
13	Osteoprotegerin levels	ebi-a-GCST90027164	Amyotrophic lateral sclerosis || id:ebi-a-GCST90027164	90274830	Inverse variance weighted	21	-0.0874704	0.0405492	0.0309943	0.916246	0.846245	0.992038	27.9153	19	0.085073	0.00771154	0.439993	0.125
14	Osteoprotegerin levels	ebi-a-GCST90027164	Amyotrophic lateral sclerosis || id:ebi-a-GCST90027164	90274830	Simple mode	21	-0.178806	0.0946245	0.0733909	0.836268	0.694703	1.00668	27.9153	19	0.085073	0.00771154	0.439993	0.125
15	Osteoprotegerin levels	ebi-a-GCST90027164	Amyotrophic lateral sclerosis || id:ebi-a-GCST90027164	90274830	Weighted mode	21	-0.0580628	0.0659397	0.389023	0.943591	0.829191	1.07377	27.9153	19	0.085073	0.00771154	0.439993	0.125
16	Interleukin-10 levels	ebi-a-GCST90027164	Amyotrophic lateral sclerosis || id:ebi-a-GCST90027164	90274795	MR Egger	19	-0.131676	0.0931179	0.175393	0.876625	0.730383	1.05215	11.0615	17	0.853349	0.00291397	0.751465	0.056
17	Interleukin-10 levels	ebi-a-GCST90027164	Amyotrophic lateral sclerosis || id:ebi-a-GCST90027164	90274795	Weighted median	19	-0.0403643	0.0562976	0.473386	0.96044	0.860099	1.07249	11.0615	17	0.853349	0.00291397	0.751465	0.056
18	Interleukin-10 levels	ebi-a-GCST90027164	Amyotrophic lateral sclerosis || id:ebi-a-GCST90027164	90274795	Inverse variance weighted	19	-0.104794	0.0411867	0.0109479	0.90051	0.830673	0.97622	11.0615	17	0.853349	0.00291397	0.751465	0.056
19	Interleukin-10 levels	ebi-a-GCST90027164	Amyotrophic lateral sclerosis || id:ebi-a-GCST90027164	90274795	Simple mode	19	-0.247068	0.111714	0.0401674	0.781087	0.62749	0.972283	11.0615	17	0.853349	0.00291397	0.751465	0.056
20	Interleukin-10 levels	ebi-a-GCST90027164	Amyotrophic lateral sclerosis || id:ebi-a-GCST90027164	90274795	Weighted mode	19	-0.0043557	0.0821828	0.958316	0.995654	0.847526	1.16967	11.0615	17	0.853349	0.00291397	0.751465	0.056
The two-sample Mendelian randomization positive results with ALS as exposures and inflammatory proteins as outcomes.
SNP（P < 5×10 -8）	id.exposure	id.outcome	outcome	exposure	method	nsnp	b	se	pval	OR	lower	upper	Q	Q_df	Q_pval(MR Egger)	egger_intercept	pval(egger_intercept)	p mr_presso
1	Amyotrophic lateral sclerosis || id:ebi-a-GCST90027164	C-C motif chemokine 20 levels	GCST90274766	|| id:ebi-a-GCST90027164	MR Egger	14	0.0624189	0.0760195	0.427606	1.06441	0.917063	1.23543	9.8839	12	0.626146	0.00292969	0.741854	0.725
2	Amyotrophic lateral sclerosis || id:ebi-a-GCST90027164	C-C motif chemokine 20 levels	GCST90274766	|| id:ebi-a-GCST90027164	Weighted median	14	0.0738822	0.0491908	0.133109	1.07668	0.97772	1.18566	9.8839	12	0.626146	0.00292969	0.741854	0.725
3	Amyotrophic lateral sclerosis || id:ebi-a-GCST90027164	C-C motif chemokine 20 levels	GCST90274766	|| id:ebi-a-GCST90027164	Inverse variance weighted	14	0.0849039	0.0364725	0.019918	1.08861	1.01351	1.16928	9.8839	12	0.626146	0.00292969	0.741854	0.725
4	Amyotrophic lateral sclerosis || id:ebi-a-GCST90027164	C-C motif chemokine 20 levels	GCST90274766	|| id:ebi-a-GCST90027164	Simple mode	14	0.0319906	0.0708088	0.658867	1.03251	0.89871	1.18622	9.8839	12	0.626146	0.00292969	0.741854	0.725
5	Amyotrophic lateral sclerosis || id:ebi-a-GCST90027164	C-C motif chemokine 20 levels	GCST90274766	|| id:ebi-a-GCST90027164	Weighted mode	14	0.0659765	0.0649603	0.32833	1.0682	0.940498	1.21325	9.8839	12	0.626146	0.00292969	0.741854	0.725
6	Amyotrophic lateral sclerosis || id:ebi-a-GCST90027164	Interleukin-5 levels	GCST90274814	|| id:ebi-a-GCST90027164	MR Egger	14	-0.0788079	0.0852081	0.37325	0.924217	0.782066	1.09221	10.2717	12	0.592142	-0.00127387	0.898468	0.686
7	Amyotrophic lateral sclerosis || id:ebi-a-GCST90027164	Interleukin-5 levels	GCST90274814	|| id:ebi-a-GCST90027164	Weighted median	14	-0.0467503	0.0546493	0.392296	0.954326	0.85739	1.06222	10.2717	12	0.592142	-0.00127387	0.898468	0.686
8	Amyotrophic lateral sclerosis || id:ebi-a-GCST90027164	Interleukin-5 levels	GCST90274814	|| id:ebi-a-GCST90027164	Inverse variance weighted	14	-0.0885463	0.0409479	0.0305861	0.915261	0.844674	0.991746	10.2717	12	0.592142	-0.00127387	0.898468	0.686
9	Amyotrophic lateral sclerosis || id:ebi-a-GCST90027164	Interleukin-5 levels	GCST90274814	|| id:ebi-a-GCST90027164	Simple mode	14	-0.0382184	0.0932824	0.688692	0.962503	0.801675	1.15559	10.2717	12	0.592142	-0.00127387	0.898468	0.686
10	Amyotrophic lateral sclerosis || id:ebi-a-GCST90027164	Interleukin-5 levels	GCST90274814	|| id:ebi-a-GCST90027164	Weighted mode	14	-0.0291354	0.0779966	0.714762	0.971285	0.833594	1.13172	10.2717	12	0.592142	-0.00127387	0.898468	0.686
11	Amyotrophic lateral sclerosis || id:ebi-a-GCST90027164	Tumor necrosis factor ligand superfamily member 12 levels	GCST90274846	|| id:ebi-a-GCST90027164	MR Egger	14	-0.015512	0.0752088	0.840052	0.984608	0.849658	1.14099	7.78698	12	0.801547	0.0140855	0.127064	0.586
12	Amyotrophic lateral sclerosis || id:ebi-a-GCST90027164	Tumor necrosis factor ligand superfamily member 12 levels	GCST90274846	|| id:ebi-a-GCST90027164	Weighted median	14	0.0849339	0.055217	0.124004	1.08865	0.976978	1.21308	7.78698	12	0.801547	0.0140855	0.127064	0.586
13	Amyotrophic lateral sclerosis || id:ebi-a-GCST90027164	Tumor necrosis factor ligand superfamily member 12 levels	GCST90274846	|| id:ebi-a-GCST90027164	Inverse variance weighted	14	0.0928368	0.0358941	0.00969816	1.09728	1.02274	1.17726	7.78698	12	0.801547	0.0140855	0.127064	0.586
14	Amyotrophic lateral sclerosis || id:ebi-a-GCST90027164	Tumor necrosis factor ligand superfamily member 12 levels	GCST90274846	|| id:ebi-a-GCST90027164	Simple mode	14	0.143704	0.101825	0.181645	1.15454	0.945658	1.40957	7.78698	12	0.801547	0.0140855	0.127064	0.586
15	Amyotrophic lateral sclerosis || id:ebi-a-GCST90027164	Tumor necrosis factor ligand superfamily member 12 levels	GCST90274846	|| id:ebi-a-GCST90027164	Weighted mode	14	-0.015734	0.0887636	0.862038	0.984389	0.827198	1.17145	7.78698	12	0.801547	0.0140855	0.127064	0.586

## Sheet: S3
Results of Forward Mendelian Randomization Analysis between 91 inflammatory proteins and ALS (snp p<5e-8)
Select snp p_value < 5e-8, clump_kb = 5000, clump_r2 = 0.01, leaving 73 of the 91 inflammatory proteins
	id.exposure	id.outcome	outcome	exposure	method	nsnp	b	se	pval	OR	lower	upper	Q	Q_df	Q_pval(MR Egger)	egger_intercept	pval(egger_intercept)	p mr_presso
1	beta-nerve growth factor levels	ebi-a-GCST90027164	Amyotrophic lateral sclerosis || id:ebi-a-GCST90027164	90274762	Inverse variance weighted	2	-0.0215228	0.102086	0.83302	0.978707	0.801226	1.1955	#N/A	#N/A	#N/A	NA	NA	#N/A
2	Sulfotransferase 1A1 levels	ebi-a-GCST90027164	Amyotrophic lateral sclerosis || id:ebi-a-GCST90027164	90274836	MR Egger	3	0.558437	0.20471	0.223686	1.74794	1.17024	2.61083	0.897672	1	0.343407	-0.0777205	0.263773	#N/A
3	Sulfotransferase 1A1 levels	ebi-a-GCST90027164	Amyotrophic lateral sclerosis || id:ebi-a-GCST90027164	90274836	Weighted median	3	0.114184	0.0488479	0.0194114	1.12096	1.01861	1.23359	0.897672	1	0.343407	-0.0777205	0.263773	#N/A
4	Sulfotransferase 1A1 levels	ebi-a-GCST90027164	Amyotrophic lateral sclerosis || id:ebi-a-GCST90027164	90274836	Inverse variance weighted	3	0.103565	0.0756442	0.170967	1.10912	0.956286	1.28637	0.897672	1	0.343407	-0.0777205	0.263773	#N/A
5	Sulfotransferase 1A1 levels	ebi-a-GCST90027164	Amyotrophic lateral sclerosis || id:ebi-a-GCST90027164	90274836	Simple mode	3	0.113903	0.0621989	0.208537	1.12064	0.992025	1.26594	0.897672	1	0.343407	-0.0777205	0.263773	#N/A
6	Sulfotransferase 1A1 levels	ebi-a-GCST90027164	Amyotrophic lateral sclerosis || id:ebi-a-GCST90027164	90274836	Weighted mode	3	0.119203	0.0480529	0.131259	1.1266	1.02533	1.23786	0.897672	1	0.343407	-0.0777205	0.263773	#N/A
7	Urokinase-type plasminogen activator levels	ebi-a-GCST90027164	Amyotrophic lateral sclerosis || id:ebi-a-GCST90027164	90274847	MR Egger	9	0.159207	0.151048	0.32689	1.17258	0.872104	1.57659	19.2405	7	0.00746652	-0.0177365	0.379491	0.012
8	Urokinase-type plasminogen activator levels	ebi-a-GCST90027164	Amyotrophic lateral sclerosis || id:ebi-a-GCST90027164	90274847	Weighted median	9	-0.0104386	0.0640089	0.870455	0.989616	0.872933	1.12189	19.2405	7	0.00746652	-0.0177365	0.379491	0.012
9	Urokinase-type plasminogen activator levels	ebi-a-GCST90027164	Amyotrophic lateral sclerosis || id:ebi-a-GCST90027164	90274847	Inverse variance weighted	9	0.0303102	0.06222	0.626155	1.03077	0.912433	1.16446	19.2405	7	0.00746652	-0.0177365	0.379491	0.012
10	Urokinase-type plasminogen activator levels	ebi-a-GCST90027164	Amyotrophic lateral sclerosis || id:ebi-a-GCST90027164	90274847	Simple mode	9	-0.0598393	0.13787	0.675737	0.941916	0.718877	1.23415	19.2405	7	0.00746652	-0.0177365	0.379491	0.012
11	Urokinase-type plasminogen activator levels	ebi-a-GCST90027164	Amyotrophic lateral sclerosis || id:ebi-a-GCST90027164	90274847	Weighted mode	9	0.170257	0.140399	0.259851	1.18561	0.900391	1.56118	19.2405	7	0.00746652	-0.0177365	0.379491	0.012
12	Adenosine Deaminase levels	ebi-a-GCST90027164	Amyotrophic lateral sclerosis || id:ebi-a-GCST90027164	90274759	MR Egger	4	0.0770051	0.0590483	0.322092	1.08005	0.962011	1.21257	5.65808	2	0.0590694	-0.00759728	0.806223	0.361
13	Adenosine Deaminase levels	ebi-a-GCST90027164	Amyotrophic lateral sclerosis || id:ebi-a-GCST90027164	90274759	Weighted median	4	0.0777484	0.0286423	0.00663836	1.08085	1.02184	1.14326	5.65808	2	0.0590694	-0.00759728	0.806223	0.361
14	Adenosine Deaminase levels	ebi-a-GCST90027164	Amyotrophic lateral sclerosis || id:ebi-a-GCST90027164	90274759	Inverse variance weighted	4	0.0646909	0.0326959	0.047865	1.06683	1.00061	1.13743	5.65808	2	0.0590694	-0.00759728	0.806223	0.361
15	Adenosine Deaminase levels	ebi-a-GCST90027164	Amyotrophic lateral sclerosis || id:ebi-a-GCST90027164	90274759	Simple mode	4	-0.0196699	0.0676371	0.790138	0.980522	0.858783	1.11952	5.65808	2	0.0590694	-0.00759728	0.806223	0.361
16	Adenosine Deaminase levels	ebi-a-GCST90027164	Amyotrophic lateral sclerosis || id:ebi-a-GCST90027164	90274759	Weighted mode	4	0.100125	0.0296104	0.0430461	1.10531	1.04299	1.17136	5.65808	2	0.0590694	-0.00759728	0.806223	0.361
17	Stem cell factor levels	ebi-a-GCST90027164	Amyotrophic lateral sclerosis || id:ebi-a-GCST90027164	90274833	MR Egger	12	-0.0512483	0.0660124	0.455516	0.950043	0.834742	1.08127	8.97142	10	0.534818	0.00481073	0.615687	0.603
18	Stem cell factor levels	ebi-a-GCST90027164	Amyotrophic lateral sclerosis || id:ebi-a-GCST90027164	90274833	Weighted median	12	-0.0205123	0.0419656	0.624991	0.979697	0.902339	1.06369	8.97142	10	0.534818	0.00481073	0.615687	0.603
19	Stem cell factor levels	ebi-a-GCST90027164	Amyotrophic lateral sclerosis || id:ebi-a-GCST90027164	90274833	Inverse variance weighted	12	-0.0210358	0.0309279	0.496404	0.979184	0.92159	1.04038	8.97142	10	0.534818	0.00481073	0.615687	0.603
20	Stem cell factor levels	ebi-a-GCST90027164	Amyotrophic lateral sclerosis || id:ebi-a-GCST90027164	90274833	Simple mode	12	-0.00583238	0.084523	0.946225	0.994185	0.842402	1.17331	8.97142	10	0.534818	0.00481073	0.615687	0.603
21	Stem cell factor levels	ebi-a-GCST90027164	Amyotrophic lateral sclerosis || id:ebi-a-GCST90027164	90274833	Weighted mode	12	-0.0253816	0.0480048	0.607496	0.974938	0.88739	1.07112	8.97142	10	0.534818	0.00481073	0.615687	0.603
22	Fibroblast growth factor 19 levels	ebi-a-GCST90027164	Amyotrophic lateral sclerosis || id:ebi-a-GCST90027164	90274787	MR Egger	3	0.0850676	0.189042	0.730806	1.08879	0.751672	1.5771	0.0698145	1	0.791607	-0.00281206	0.924938	#N/A
23	Fibroblast growth factor 19 levels	ebi-a-GCST90027164	Amyotrophic lateral sclerosis || id:ebi-a-GCST90027164	90274787	Weighted median	3	0.0675	0.0582236	0.246324	1.06983	0.954452	1.19916	0.0698145	1	0.791607	-0.00281206	0.924938	#N/A
24	Fibroblast growth factor 19 levels	ebi-a-GCST90027164	Amyotrophic lateral sclerosis || id:ebi-a-GCST90027164	90274787	Inverse variance weighted	3	0.0635704	0.0529455	0.229877	1.06563	0.960595	1.18216	0.0698145	1	0.791607	-0.00281206	0.924938	#N/A
25	Fibroblast growth factor 19 levels	ebi-a-GCST90027164	Amyotrophic lateral sclerosis || id:ebi-a-GCST90027164	90274787	Simple mode	3	0.0728508	0.0788972	0.453296	1.07557	0.921468	1.25544	0.0698145	1	0.791607	-0.00281206	0.924938	#N/A
26	Fibroblast growth factor 19 levels	ebi-a-GCST90027164	Amyotrophic lateral sclerosis || id:ebi-a-GCST90027164	90274787	Weighted mode	3	0.0720104	0.0616195	0.363	1.07467	0.952406	1.21262	0.0698145	1	0.791607	-0.00281206	0.924938	#N/A
27	C-C motif chemokine 19 levels	ebi-a-GCST90027164	Amyotrophic lateral sclerosis || id:ebi-a-GCST90027164	90274765	MR Egger	4	0.215509	0.104533	0.175369	1.24049	1.01068	1.52256	1.25782	2	0.533173	-0.0583608	0.156072	0.226
28	C-C motif chemokine 19 levels	ebi-a-GCST90027164	Amyotrophic lateral sclerosis || id:ebi-a-GCST90027164	90274765	Weighted median	4	-0.00754805	0.0606073	0.900888	0.99248	0.881317	1.11767	1.25782	2	0.533173	-0.0583608	0.156072	0.226
29	C-C motif chemokine 19 levels	ebi-a-GCST90027164	Amyotrophic lateral sclerosis || id:ebi-a-GCST90027164	90274765	Inverse variance weighted	4	0.00431555	0.0629618	0.945354	1.00432	0.887728	1.13624	1.25782	2	0.533173	-0.0583608	0.156072	0.226
30	C-C motif chemokine 19 levels	ebi-a-GCST90027164	Amyotrophic lateral sclerosis || id:ebi-a-GCST90027164	90274765	Simple mode	4	-0.110147	0.105958	0.374977	0.895703	0.727731	1.10245	1.25782	2	0.533173	-0.0583608	0.156072	0.226
31	C-C motif chemokine 19 levels	ebi-a-GCST90027164	Amyotrophic lateral sclerosis || id:ebi-a-GCST90027164	90274765	Weighted mode	4	-0.0686431	0.0959163	0.525876	0.93366	0.773647	1.12677	1.25782	2	0.533173	-0.0583608	0.156072	0.226
32	Vascular endothelial growth factor A levels	ebi-a-GCST90027164	Amyotrophic lateral sclerosis || id:ebi-a-GCST90027164	90274848	MR Egger	7	0.0264677	0.0498256	0.618016	1.02682	0.931285	1.13216	4.65989	5	0.45878	-0.00671513	0.519097	0.56
33	Vascular endothelial growth factor A levels	ebi-a-GCST90027164	Amyotrophic lateral sclerosis || id:ebi-a-GCST90027164	90274848	Weighted median	7	0.0058135	0.0296814	0.844717	1.00583	0.948985	1.06608	4.65989	5	0.45878	-0.00671513	0.519097	0.56
34	Vascular endothelial growth factor A levels	ebi-a-GCST90027164	Amyotrophic lateral sclerosis || id:ebi-a-GCST90027164	90274848	Inverse variance weighted	7	-0.0023439	0.0274728	0.932009	0.997659	0.945359	1.05285	4.65989	5	0.45878	-0.00671513	0.519097	0.56
35	Vascular endothelial growth factor A levels	ebi-a-GCST90027164	Amyotrophic lateral sclerosis || id:ebi-a-GCST90027164	90274848	Simple mode	7	-0.00984004	0.0617242	0.878569	0.990208	0.877376	1.11755	4.65989	5	0.45878	-0.00671513	0.519097	0.56
36	Vascular endothelial growth factor A levels	ebi-a-GCST90027164	Amyotrophic lateral sclerosis || id:ebi-a-GCST90027164	90274848	Weighted mode	7	0.0102456	0.0306697	0.7497	1.0103	0.951356	1.07289	4.65989	5	0.45878	-0.00671513	0.519097	0.56
37	C-X-C motif chemokine 11 levels	ebi-a-GCST90027164	Amyotrophic lateral sclerosis || id:ebi-a-GCST90027164	90274781	MR Egger	6	0.130241	0.093954	0.237944	1.1391	0.947519	1.36943	5.94423	4	0.203352	-0.0240217	0.217325	0.148
38	C-X-C motif chemokine 11 levels	ebi-a-GCST90027164	Amyotrophic lateral sclerosis || id:ebi-a-GCST90027164	90274781	Weighted median	6	-0.0234933	0.0541634	0.664472	0.976781	0.8784	1.08618	5.94423	4	0.203352	-0.0240217	0.217325	0.148
39	C-X-C motif chemokine 11 levels	ebi-a-GCST90027164	Amyotrophic lateral sclerosis || id:ebi-a-GCST90027164	90274781	Inverse variance weighted	6	0.0131968	0.054581	0.808947	1.01328	0.910481	1.12769	5.94423	4	0.203352	-0.0240217	0.217325	0.148
40	C-X-C motif chemokine 11 levels	ebi-a-GCST90027164	Amyotrophic lateral sclerosis || id:ebi-a-GCST90027164	90274781	Simple mode	6	-0.012725	0.0896449	0.892663	0.987356	0.828259	1.17701	5.94423	4	0.203352	-0.0240217	0.217325	0.148
41	C-X-C motif chemokine 11 levels	ebi-a-GCST90027164	Amyotrophic lateral sclerosis || id:ebi-a-GCST90027164	90274781	Weighted mode	6	-0.0297117	0.0645255	0.664515	0.970725	0.855404	1.10159	5.94423	4	0.203352	-0.0240217	0.217325	0.148
42	TNF-related apoptosis-inducing ligand levels	ebi-a-GCST90027164	Amyotrophic lateral sclerosis || id:ebi-a-GCST90027164	90274843	MR Egger	9	-0.0136096	0.0546002	0.810316	0.986483	0.886365	1.09791	11.7643	7	0.108582	0.00643762	0.534493	0.122
43	TNF-related apoptosis-inducing ligand levels	ebi-a-GCST90027164	Amyotrophic lateral sclerosis || id:ebi-a-GCST90027164	90274843	Weighted median	9	0.0231045	0.0395863	0.559457	1.02337	0.946973	1.10594	11.7643	7	0.108582	0.00643762	0.534493	0.122
44	TNF-related apoptosis-inducing ligand levels	ebi-a-GCST90027164	Amyotrophic lateral sclerosis || id:ebi-a-GCST90027164	90274843	Inverse variance weighted	9	0.013219	0.0346613	0.702924	1.01331	0.946753	1.08454	11.7643	7	0.108582	0.00643762	0.534493	0.122
45	TNF-related apoptosis-inducing ligand levels	ebi-a-GCST90027164	Amyotrophic lateral sclerosis || id:ebi-a-GCST90027164	90274843	Simple mode	9	0.102645	0.0668679	0.163321	1.1081	0.971984	1.26327	11.7643	7	0.108582	0.00643762	0.534493	0.122
46	TNF-related apoptosis-inducing ligand levels	ebi-a-GCST90027164	Amyotrophic lateral sclerosis || id:ebi-a-GCST90027164	90274843	Weighted mode	9	0.0997046	0.0552781	0.108937	1.10484	0.991397	1.23127	11.7643	7	0.108582	0.00643762	0.534493	0.122
47	Cystatin D levels	ebi-a-GCST90027164	Amyotrophic lateral sclerosis || id:ebi-a-GCST90027164	90274777	MR Egger	14	-0.0300572	0.041817	0.486038	0.97039	0.894028	1.05327	11.8958	12	0.454088	0.00458471	0.584364	0.535
48	Cystatin D levels	ebi-a-GCST90027164	Amyotrophic lateral sclerosis || id:ebi-a-GCST90027164	90274777	Weighted median	14	0.00534778	0.0299352	0.858216	1.00536	0.948072	1.06611	11.8958	12	0.454088	0.00458471	0.584364	0.535
49	Cystatin D levels	ebi-a-GCST90027164	Amyotrophic lateral sclerosis || id:ebi-a-GCST90027164	90274777	Inverse variance weighted	14	-0.0104095	0.0229581	0.65025	0.989644	0.9461	1.03519	11.8958	12	0.454088	0.00458471	0.584364	0.535
50	Cystatin D levels	ebi-a-GCST90027164	Amyotrophic lateral sclerosis || id:ebi-a-GCST90027164	90274777	Simple mode	14	0.00486773	0.0597664	0.936328	1.00488	0.893799	1.12977	11.8958	12	0.454088	0.00458471	0.584364	0.535
51	Cystatin D levels	ebi-a-GCST90027164	Amyotrophic lateral sclerosis || id:ebi-a-GCST90027164	90274777	Weighted mode	14	0.0103969	0.0293231	0.728601	1.01045	0.954015	1.07023	11.8958	12	0.454088	0.00458471	0.584364	0.535
52	TNF-beta levels	ebi-a-GCST90027164	Amyotrophic lateral sclerosis || id:ebi-a-GCST90027164	90274840	MR Egger	9	-0.0363288	0.0540181	0.522819	0.964323	0.867444	1.07202	17.5629	7	0.014106	-0.00692793	0.684376	0.088
53	TNF-beta levels	ebi-a-GCST90027164	Amyotrophic lateral sclerosis || id:ebi-a-GCST90027164	90274840	Weighted median	9	-0.0387804	0.0250935	0.122241	0.961962	0.915794	1.01046	17.5629	7	0.014106	-0.00692793	0.684376	0.088
54	TNF-beta levels	ebi-a-GCST90027164	Amyotrophic lateral sclerosis || id:ebi-a-GCST90027164	90274840	Inverse variance weighted	9	-0.0546932	0.0305645	0.0735451	0.946776	0.891723	1.00523	17.5629	7	0.014106	-0.00692793	0.684376	0.088
55	TNF-beta levels	ebi-a-GCST90027164	Amyotrophic lateral sclerosis || id:ebi-a-GCST90027164	90274840	Simple mode	9	-0.0231856	0.0357007	0.53425	0.977081	0.911049	1.0479	17.5629	7	0.014106	-0.00692793	0.684376	0.088
56	TNF-beta levels	ebi-a-GCST90027164	Amyotrophic lateral sclerosis || id:ebi-a-GCST90027164	90274840	Weighted mode	9	-0.0340978	0.0243957	0.199744	0.966477	0.921352	1.01381	17.5629	7	0.014106	-0.00692793	0.684376	0.088
57	Protein S100-A12 levels	ebi-a-GCST90027164	Amyotrophic lateral sclerosis || id:ebi-a-GCST90027164	90274786	Inverse variance weighted	2	0.0973775	0.0611141	0.111077	1.10228	0.977843	1.24254	#N/A	#N/A	#N/A	NA	NA	#N/A
58	C-C motif chemokine 28 levels	ebi-a-GCST90027164	Amyotrophic lateral sclerosis || id:ebi-a-GCST90027164	90274769	MR Egger	4	0.166886	0.241	0.560236	1.18162	0.736774	1.89505	1.90723	2	0.385345	-0.011658	0.59623	0.543
59	C-C motif chemokine 28 levels	ebi-a-GCST90027164	Amyotrophic lateral sclerosis || id:ebi-a-GCST90027164	90274769	Weighted median	4	0.035136	0.100849	0.727539	1.03576	0.849992	1.26213	1.90723	2	0.385345	-0.011658	0.59623	0.543
60	C-C motif chemokine 28 levels	ebi-a-GCST90027164	Amyotrophic lateral sclerosis || id:ebi-a-GCST90027164	90274769	Inverse variance weighted	4	0.0260039	0.084459	0.758168	1.02634	0.869762	1.21112	1.90723	2	0.385345	-0.011658	0.59623	0.543
61	C-C motif chemokine 28 levels	ebi-a-GCST90027164	Amyotrophic lateral sclerosis || id:ebi-a-GCST90027164	90274769	Simple mode	4	0.122798	0.141423	0.449112	1.13066	0.856938	1.4918	1.90723	2	0.385345	-0.011658	0.59623	0.543
62	C-C motif chemokine 28 levels	ebi-a-GCST90027164	Amyotrophic lateral sclerosis || id:ebi-a-GCST90027164	90274769	Weighted mode	4	0.115603	0.146943	0.488869	1.12255	0.841638	1.49722	1.90723	2	0.385345	-0.011658	0.59623	0.543
63	Caspase 8 levels	ebi-a-GCST90027164	Amyotrophic lateral sclerosis || id:ebi-a-GCST90027164	90274763	Wald ratio	1	0.0397584	0.0825365	0.630014	1.04056	0.885137	1.22327	#N/A	#N/A	#N/A	#N/A	#N/A	#N/A
64	Tumor necrosis factor ligand superfamily member 14 levels	ebi-a-GCST90027164	Amyotrophic lateral sclerosis || id:ebi-a-GCST90027164	90274842	MR Egger	4	-0.0152177	0.100935	0.893992	0.984897	0.808115	1.20035	5.55343	2	0.0622426	-0.0167407	0.519548	0.259
65	Tumor necrosis factor ligand superfamily member 14 levels	ebi-a-GCST90027164	Amyotrophic lateral sclerosis || id:ebi-a-GCST90027164	90274842	Weighted median	4	-0.0644459	0.0424537	0.129008	0.937587	0.862729	1.01894	5.55343	2	0.0622426	-0.0167407	0.519548	0.259
66	Tumor necrosis factor ligand superfamily member 14 levels	ebi-a-GCST90027164	Amyotrophic lateral sclerosis || id:ebi-a-GCST90027164	90274842	Inverse variance weighted	4	-0.0751672	0.0603364	0.212837	0.927588	0.82413	1.04403	5.55343	2	0.0622426	-0.0167407	0.519548	0.259
67	Tumor necrosis factor ligand superfamily member 14 levels	ebi-a-GCST90027164	Amyotrophic lateral sclerosis || id:ebi-a-GCST90027164	90274842	Simple mode	4	-0.151386	0.0912865	0.195825	0.859516	0.718702	1.02792	5.55343	2	0.0622426	-0.0167407	0.519548	0.259
68	Tumor necrosis factor ligand superfamily member 14 levels	ebi-a-GCST90027164	Amyotrophic lateral sclerosis || id:ebi-a-GCST90027164	90274842	Weighted mode	4	-0.0441095	0.0525268	0.462696	0.956849	0.86324	1.06061	5.55343	2	0.0622426	-0.0167407	0.519548	0.259
69	Macrophage inflammatory protein 1a levels	ebi-a-GCST90027164	Amyotrophic lateral sclerosis || id:ebi-a-GCST90027164	90274825	MR Egger	5	0.0326332	0.0613481	0.631644	1.03317	0.916119	1.16518	4.32977	3	0.227986	-0.0130915	0.398938	0.472
70	Macrophage inflammatory protein 1a levels	ebi-a-GCST90027164	Amyotrophic lateral sclerosis || id:ebi-a-GCST90027164	90274825	Weighted median	5	-0.00120101	0.034929	0.972571	0.9988	0.932709	1.06957	4.32977	3	0.227986	-0.0130915	0.398938	0.472
71	Macrophage inflammatory protein 1a levels	ebi-a-GCST90027164	Amyotrophic lateral sclerosis || id:ebi-a-GCST90027164	90274825	Inverse variance weighted	5	-0.0135481	0.0391518	0.729312	0.986543	0.91367	1.06523	4.32977	3	0.227986	-0.0130915	0.398938	0.472
72	Macrophage inflammatory protein 1a levels	ebi-a-GCST90027164	Amyotrophic lateral sclerosis || id:ebi-a-GCST90027164	90274825	Simple mode	5	0.0618546	0.0946457	0.549073	1.06381	0.883688	1.28064	4.32977	3	0.227986	-0.0130915	0.398938	0.472
73	Macrophage inflammatory protein 1a levels	ebi-a-GCST90027164	Amyotrophic lateral sclerosis || id:ebi-a-GCST90027164	90274825	Weighted mode	5	0.00124898	0.0350557	0.973286	1.00125	0.934765	1.07246	4.32977	3	0.227986	-0.0130915	0.398938	0.472
74	Eukaryotic translation initiation factor 4E-binding protein 1 levels	ebi-a-GCST90027164	Amyotrophic lateral sclerosis || id:ebi-a-GCST90027164	90274758	Inverse variance weighted	2	0.000160815	0.126138	0.998983	1.00016	0.781086	1.28068	#N/A	#N/A	#N/A	NA	NA	#N/A
75	C-X-C motif chemokine 6 levels	ebi-a-GCST90027164	Amyotrophic lateral sclerosis || id:ebi-a-GCST90027164	90274783	MR Egger	5	-0.0343004	0.0420085	0.474013	0.966281	0.889908	1.04921	2.58229	3	0.460604	0.0133831	0.252088	0.554
76	C-X-C motif chemokine 6 levels	ebi-a-GCST90027164	Amyotrophic lateral sclerosis || id:ebi-a-GCST90027164	90274783	Weighted median	5	0.0190431	0.0279788	0.496107	1.01923	0.964838	1.07668	2.58229	3	0.460604	0.0133831	0.252088	0.554
77	C-X-C motif chemokine 6 levels	ebi-a-GCST90027164	Amyotrophic lateral sclerosis || id:ebi-a-GCST90027164	90274783	Inverse variance weighted	5	0.0124306	0.027782	0.654563	1.01251	0.958849	1.06917	2.58229	3	0.460604	0.0133831	0.252088	0.554
78	C-X-C motif chemokine 6 levels	ebi-a-GCST90027164	Amyotrophic lateral sclerosis || id:ebi-a-GCST90027164	90274783	Simple mode	5	0.0702279	0.0583347	0.295005	1.07275	0.956851	1.20269	2.58229	3	0.460604	0.0133831	0.252088	0.554
79	C-X-C motif chemokine 6 levels	ebi-a-GCST90027164	Amyotrophic lateral sclerosis || id:ebi-a-GCST90027164	90274783	Weighted mode	5	0.0214262	0.0310634	0.528278	1.02166	0.96131	1.08579	2.58229	3	0.460604	0.0133831	0.252088	0.554
80	C-X-C motif chemokine 1 levels	ebi-a-GCST90027164	Amyotrophic lateral sclerosis || id:ebi-a-GCST90027164	90274779	MR Egger	3	-0.00535868	0.118365	0.971198	0.994656	0.788712	1.25437	2.81546	1	0.0933603	0.00560512	0.861339	#N/A
81	C-X-C motif chemokine 1 levels	ebi-a-GCST90027164	Amyotrophic lateral sclerosis || id:ebi-a-GCST90027164	90274779	Weighted median	3	0.00422413	0.0405552	0.917044	1.00423	0.927499	1.08732	2.81546	1	0.0933603	0.00560512	0.861339	#N/A
82	C-X-C motif chemokine 1 levels	ebi-a-GCST90027164	Amyotrophic lateral sclerosis || id:ebi-a-GCST90027164	90274779	Inverse variance weighted	3	0.0162702	0.048364	0.736562	1.0164	0.92448	1.11747	2.81546	1	0.0933603	0.00560512	0.861339	#N/A
83	C-X-C motif chemokine 1 levels	ebi-a-GCST90027164	Amyotrophic lateral sclerosis || id:ebi-a-GCST90027164	90274779	Simple mode	3	0.0258337	0.0948502	0.810886	1.02617	0.852082	1.23583	2.81546	1	0.0933603	0.00560512	0.861339	#N/A
84	C-X-C motif chemokine 1 levels	ebi-a-GCST90027164	Amyotrophic lateral sclerosis || id:ebi-a-GCST90027164	90274779	Weighted mode	3	0.000783335	0.0423543	0.986923	1.00078	0.921059	1.08741	2.81546	1	0.0933603	0.00560512	0.861339	#N/A
85	C-C motif chemokine 23 levels	ebi-a-GCST90027164	Amyotrophic lateral sclerosis || id:ebi-a-GCST90027164	90274767	MR Egger	7	0.0206784	0.0502588	0.697794	1.02089	0.925123	1.12658	1.57847	5	0.903841	-0.00322804	0.871379	0.944
86	C-C motif chemokine 23 levels	ebi-a-GCST90027164	Amyotrophic lateral sclerosis || id:ebi-a-GCST90027164	90274767	Weighted median	7	0.00705242	0.0267184	0.791815	1.00708	0.955696	1.06122	1.57847	5	0.903841	-0.00322804	0.871379	0.944
87	C-C motif chemokine 23 levels	ebi-a-GCST90027164	Amyotrophic lateral sclerosis || id:ebi-a-GCST90027164	90274767	Inverse variance weighted	7	0.0130475	0.0228127	0.567362	1.01313	0.968831	1.05946	1.57847	5	0.903841	-0.00322804	0.871379	0.944
88	C-C motif chemokine 23 levels	ebi-a-GCST90027164	Amyotrophic lateral sclerosis || id:ebi-a-GCST90027164	90274767	Simple mode	7	0.0202757	0.0405273	0.634682	1.02048	0.942558	1.10485	1.57847	5	0.903841	-0.00322804	0.871379	0.944
89	C-C motif chemokine 23 levels	ebi-a-GCST90027164	Amyotrophic lateral sclerosis || id:ebi-a-GCST90027164	90274767	Weighted mode	7	0.0114365	0.0283139	0.700274	1.0115	0.956898	1.06922	1.57847	5	0.903841	-0.00322804	0.871379	0.944
90	Programmed cell death 1 ligand 1 levels	ebi-a-GCST90027164	Amyotrophic lateral sclerosis || id:ebi-a-GCST90027164	90274832	Wald ratio	1	-0.00617761	0.0926641	0.946847	0.993841	0.828781	1.19178	#N/A	#N/A	#N/A	#N/A	#N/A	#N/A
91	Fibroblast growth factor 21 levels	ebi-a-GCST90027164	Amyotrophic lateral sclerosis || id:ebi-a-GCST90027164	90274788	MR Egger	3	0.359193	0.26292	0.402257	1.43217	0.855448	2.39771	0.263471	1	0.607746	-0.0364696	0.469271	#N/A
92	Fibroblast growth factor 21 levels	ebi-a-GCST90027164	Amyotrophic lateral sclerosis || id:ebi-a-GCST90027164	90274788	Weighted median	3	0.103685	0.0661312	0.116913	1.10925	0.974401	1.26276	0.263471	1	0.607746	-0.0364696	0.469271	#N/A
93	Fibroblast growth factor 21 levels	ebi-a-GCST90027164	Amyotrophic lateral sclerosis || id:ebi-a-GCST90027164	90274788	Inverse variance weighted	3	0.0776537	0.061638	0.207729	1.08075	0.957761	1.21953	0.263471	1	0.607746	-0.0364696	0.469271	#N/A
94	Fibroblast growth factor 21 levels	ebi-a-GCST90027164	Amyotrophic lateral sclerosis || id:ebi-a-GCST90027164	90274788	Simple mode	3	0.104071	0.0882404	0.359529	1.10968	0.933439	1.3192	0.263471	1	0.607746	-0.0364696	0.469271	#N/A
95	Fibroblast growth factor 21 levels	ebi-a-GCST90027164	Amyotrophic lateral sclerosis || id:ebi-a-GCST90027164	90274788	Weighted mode	3	0.106719	0.0749111	0.290307	1.11262	0.960687	1.28859	0.263471	1	0.607746	-0.0364696	0.469271	#N/A
96	Macrophage colony-stimulating factor 1 levels	ebi-a-GCST90027164	Amyotrophic lateral sclerosis || id:ebi-a-GCST90027164	90274776	Wald ratio	1	-0.0498812	0.0665083	0.453255	0.951342	0.835072	1.0838	#N/A	#N/A	#N/A	#N/A	#N/A	#N/A
97	Monocyte chemoattractant protein-1 levels	ebi-a-GCST90027164	Amyotrophic lateral sclerosis || id:ebi-a-GCST90027164	90274821	MR Egger	6	0.0219633	0.0993495	0.835864	1.02221	0.841338	1.24196	1.47926	4	0.830308	-0.00105509	0.952985	0.924
98	Monocyte chemoattractant protein-1 levels	ebi-a-GCST90027164	Amyotrophic lateral sclerosis || id:ebi-a-GCST90027164	90274821	Weighted median	6	0.0191678	0.0468301	0.682315	1.01935	0.929955	1.11734	1.47926	4	0.830308	-0.00105509	0.952985	0.924
99	Monocyte chemoattractant protein-1 levels	ebi-a-GCST90027164	Amyotrophic lateral sclerosis || id:ebi-a-GCST90027164	90274821	Inverse variance weighted	6	0.0162537	0.0398486	0.683358	1.01639	0.940024	1.09895	1.47926	4	0.830308	-0.00105509	0.952985	0.924
100	Monocyte chemoattractant protein-1 levels	ebi-a-GCST90027164	Amyotrophic lateral sclerosis || id:ebi-a-GCST90027164	90274821	Simple mode	6	0.0066704	0.066727	0.924256	1.00669	0.883279	1.14735	1.47926	4	0.830308	-0.00105509	0.952985	0.924
101	Monocyte chemoattractant protein-1 levels	ebi-a-GCST90027164	Amyotrophic lateral sclerosis || id:ebi-a-GCST90027164	90274821	Weighted mode	6	0.0303028	0.0515112	0.581914	1.03077	0.931779	1.14027	1.47926	4	0.830308	-0.00105509	0.952985	0.924
102	Neurotrophin-3 levels	ebi-a-GCST90027164	Amyotrophic lateral sclerosis || id:ebi-a-GCST90027164	90274829	Wald ratio	1	0.00770548	0.132705	0.953697	1.00774	0.776936	1.3071	#N/A	#N/A	#N/A	#N/A	#N/A	#N/A
103	Monocyte chemoattractant protein-4 levels	ebi-a-GCST90027164	Amyotrophic lateral sclerosis || id:ebi-a-GCST90027164	90274824	MR Egger	10	0.0372749	0.0816655	0.660215	1.03798	0.88445	1.21816	6.48684	8	0.592868	-0.00647689	0.67544	0.724
104	Monocyte chemoattractant protein-4 levels	ebi-a-GCST90027164	Amyotrophic lateral sclerosis || id:ebi-a-GCST90027164	90274824	Weighted median	10	0.0179821	0.0381272	0.637187	1.01814	0.944833	1.09715	6.48684	8	0.592868	-0.00647689	0.67544	0.724
105	Monocyte chemoattractant protein-4 levels	ebi-a-GCST90027164	Amyotrophic lateral sclerosis || id:ebi-a-GCST90027164	90274824	Inverse variance weighted	10	0.0041336	0.0291579	0.887265	1.00414	0.948365	1.0632	6.48684	8	0.592868	-0.00647689	0.67544	0.724
106	Monocyte chemoattractant protein-4 levels	ebi-a-GCST90027164	Amyotrophic lateral sclerosis || id:ebi-a-GCST90027164	90274824	Simple mode	10	0.0272393	0.0530672	0.620105	1.02761	0.926101	1.14025	6.48684	8	0.592868	-0.00647689	0.67544	0.724
107	Monocyte chemoattractant protein-4 levels	ebi-a-GCST90027164	Amyotrophic lateral sclerosis || id:ebi-a-GCST90027164	90274824	Weighted mode	10	0.0285345	0.0443197	0.535743	1.02895	0.943337	1.12232	6.48684	8	0.592868	-0.00647689	0.67544	0.724
108	Transforming growth factor-alpha levels	ebi-a-GCST90027164	Amyotrophic lateral sclerosis || id:ebi-a-GCST90027164	90274838	Inverse variance weighted	2	-0.00856762	0.163073	0.958099	0.991469	0.720226	1.36486	#N/A	#N/A	#N/A	NA	NA	#N/A
109	Signaling lymphocytic activation molecule levels	ebi-a-GCST90027164	Amyotrophic lateral sclerosis || id:ebi-a-GCST90027164	90274835	MR Egger	7	-0.0184381	0.134152	0.896045	0.981731	0.754744	1.27698	5.01943	5	0.413514	0.00491085	0.751789	0.582
110	Signaling lymphocytic activation molecule levels	ebi-a-GCST90027164	Amyotrophic lateral sclerosis || id:ebi-a-GCST90027164	90274835	Weighted median	7	0.0538078	0.0580718	0.354148	1.05528	0.941752	1.1825	5.01943	5	0.413514	0.00491085	0.751789	0.582
111	Signaling lymphocytic activation molecule levels	ebi-a-GCST90027164	Amyotrophic lateral sclerosis || id:ebi-a-GCST90027164	90274835	Inverse variance weighted	7	0.0236495	0.0461411	0.608268	1.02393	0.935394	1.12085	5.01943	5	0.413514	0.00491085	0.751789	0.582
112	Signaling lymphocytic activation molecule levels	ebi-a-GCST90027164	Amyotrophic lateral sclerosis || id:ebi-a-GCST90027164	90274835	Simple mode	7	0.107697	0.0868654	0.261334	1.11371	0.939357	1.32042	5.01943	5	0.413514	0.00491085	0.751789	0.582
113	Signaling lymphocytic activation molecule levels	ebi-a-GCST90027164	Amyotrophic lateral sclerosis || id:ebi-a-GCST90027164	90274835	Weighted mode	7	0.110752	0.0723038	0.176467	1.11712	0.969511	1.2872	5.01943	5	0.413514	0.00491085	0.751789	0.582
114	Interleukin-8 levels	ebi-a-GCST90027164	Amyotrophic lateral sclerosis || id:ebi-a-GCST90027164	90274817	Inverse variance weighted	2	-0.0433322	0.146656	0.767636	0.957593	0.718365	1.27649	#N/A	#N/A	#N/A	NA	NA	#N/A
115	Oncostatin-M levels	ebi-a-GCST90027164	Amyotrophic lateral sclerosis || id:ebi-a-GCST90027164	90274831	MR Egger	4	-0.00790869	0.2759	0.979735	0.992123	0.577716	1.70379	0.359068	2	0.835659	-0.0191655	0.595814	0.864
116	Oncostatin-M levels	ebi-a-GCST90027164	Amyotrophic lateral sclerosis || id:ebi-a-GCST90027164	90274831	Weighted median	4	-0.14853	0.08252	0.071872	0.861974	0.73325	1.0133	0.359068	2	0.835659	-0.0191655	0.595814	0.864
117	Oncostatin-M levels	ebi-a-GCST90027164	Amyotrophic lateral sclerosis || id:ebi-a-GCST90027164	90274831	Inverse variance weighted	4	-0.17429	0.0723636	0.016017	0.840053	0.72897	0.968064	0.359068	2	0.835659	-0.0191655	0.595814	0.864
118	Oncostatin-M levels	ebi-a-GCST90027164	Amyotrophic lateral sclerosis || id:ebi-a-GCST90027164	90274831	Simple mode	4	-0.157677	0.1097	0.246173	0.854126	0.68888	1.05901	0.359068	2	0.835659	-0.0191655	0.595814	0.864
119	Oncostatin-M levels	ebi-a-GCST90027164	Amyotrophic lateral sclerosis || id:ebi-a-GCST90027164	90274831	Weighted mode	4	-0.146966	0.0911226	0.205178	0.863323	0.722118	1.03214	0.359068	2	0.835659	-0.0191655	0.595814	0.864
120	C-X-C motif chemokine 10 levels	ebi-a-GCST90027164	Amyotrophic lateral sclerosis || id:ebi-a-GCST90027164	90274780	MR Egger	6	0.112783	0.0772904	0.218274	1.11939	0.962033	1.30248	2.11993	4	0.713711	-0.0230026	0.171438	0.461
121	C-X-C motif chemokine 10 levels	ebi-a-GCST90027164	Amyotrophic lateral sclerosis || id:ebi-a-GCST90027164	90274780	Weighted median	6	0.0381571	0.0568612	0.502184	1.03889	0.92933	1.16138	2.11993	4	0.713711	-0.0230026	0.171438	0.461
122	C-X-C motif chemokine 10 levels	ebi-a-GCST90027164	Amyotrophic lateral sclerosis || id:ebi-a-GCST90027164	90274780	Inverse variance weighted	6	0.0093046	0.0459	0.839358	1.00935	0.922508	1.10436	2.11993	4	0.713711	-0.0230026	0.171438	0.461
123	C-X-C motif chemokine 10 levels	ebi-a-GCST90027164	Amyotrophic lateral sclerosis || id:ebi-a-GCST90027164	90274780	Simple mode	6	0.00676485	0.0864839	0.940686	1.00679	0.849809	1.19276	2.11993	4	0.713711	-0.0230026	0.171438	0.461
124	C-X-C motif chemokine 10 levels	ebi-a-GCST90027164	Amyotrophic lateral sclerosis || id:ebi-a-GCST90027164	90274780	Weighted mode	6	0.0596524	0.0696426	0.430821	1.06147	0.926031	1.21671	2.11993	4	0.713711	-0.0230026	0.171438	0.461
125	Hepatocyte growth factor levels	ebi-a-GCST90027164	Amyotrophic lateral sclerosis || id:ebi-a-GCST90027164	90274793	Inverse variance weighted	2	-0.00641122	0.137261	0.962746	0.993609	0.759236	1.30033	#N/A	#N/A	#N/A	NA	NA	#N/A
126	Osteoprotegerin levels	ebi-a-GCST90027164	Amyotrophic lateral sclerosis || id:ebi-a-GCST90027164	90274830	MR Egger	6	-0.0335545	0.231779	0.891894	0.967002	0.613951	1.52308	12.5196	4	0.0138779	-0.0138181	0.696616	0.157
127	Osteoprotegerin levels	ebi-a-GCST90027164	Amyotrophic lateral sclerosis || id:ebi-a-GCST90027164	90274830	Weighted median	6	-0.130398	0.0613446	0.0335319	0.877746	0.778308	0.989889	12.5196	4	0.0138779	-0.0138181	0.696616	0.157
128	Osteoprotegerin levels	ebi-a-GCST90027164	Amyotrophic lateral sclerosis || id:ebi-a-GCST90027164	90274830	Inverse variance weighted	6	-0.12485	0.0724577	0.0848746	0.882629	0.765775	1.01732	12.5196	4	0.0138779	-0.0138181	0.696616	0.157
129	Osteoprotegerin levels	ebi-a-GCST90027164	Amyotrophic lateral sclerosis || id:ebi-a-GCST90027164	90274830	Simple mode	6	-0.293695	0.122577	0.0619253	0.745504	0.586288	0.947958	12.5196	4	0.0138779	-0.0138181	0.696616	0.157
130	Osteoprotegerin levels	ebi-a-GCST90027164	Amyotrophic lateral sclerosis || id:ebi-a-GCST90027164	90274830	Weighted mode	6	-0.0941188	0.0632095	0.196662	0.910175	0.804118	1.03022	12.5196	4	0.0138779	-0.0138181	0.696616	0.157
131	Interleukin-6 levels	ebi-a-GCST90027164	Amyotrophic lateral sclerosis || id:ebi-a-GCST90027164	90274815	Wald ratio	1	0.0671021	0.067696	0.321574	1.0694	0.936522	1.22114	#N/A	#N/A	#N/A	#N/A	#N/A	#N/A
132	Fms-related tyrosine kinase 3 ligand levels	ebi-a-GCST90027164	Amyotrophic lateral sclerosis || id:ebi-a-GCST90027164	90274791	MR Egger	6	-0.0184786	0.194532	0.928891	0.981691	0.67048	1.43735	1.66807	4	0.79651	-0.00362337	0.846369	0.902
133	Fms-related tyrosine kinase 3 ligand levels	ebi-a-GCST90027164	Amyotrophic lateral sclerosis || id:ebi-a-GCST90027164	90274791	Weighted median	6	-0.0617222	0.0693029	0.373136	0.940144	0.820734	1.07693	1.66807	4	0.79651	-0.00362337	0.846369	0.902
134	Fms-related tyrosine kinase 3 ligand levels	ebi-a-GCST90027164	Amyotrophic lateral sclerosis || id:ebi-a-GCST90027164	90274791	Inverse variance weighted	6	-0.056969	0.0561569	0.310363	0.944623	0.846169	1.05453	1.66807	4	0.79651	-0.00362337	0.846369	0.902
135	Fms-related tyrosine kinase 3 ligand levels	ebi-a-GCST90027164	Amyotrophic lateral sclerosis || id:ebi-a-GCST90027164	90274791	Simple mode	6	-0.0272675	0.0922219	0.779366	0.973101	0.812189	1.16589	1.66807	4	0.79651	-0.00362337	0.846369	0.902
136	Fms-related tyrosine kinase 3 ligand levels	ebi-a-GCST90027164	Amyotrophic lateral sclerosis || id:ebi-a-GCST90027164	90274791	Weighted mode	6	-0.0627399	0.0995543	0.556234	0.939188	0.772699	1.14155	1.66807	4	0.79651	-0.00362337	0.846369	0.902
137	Latency-associated peptide transforming growth factor beta 1 levels	ebi-a-GCST90027164	Amyotrophic lateral sclerosis || id:ebi-a-GCST90027164	90274818	Inverse variance weighted	2	-0.00333398	0.120175	0.977867	0.996672	0.787512	1.26138	#N/A	#N/A	#N/A	NA	NA	#N/A
138	C-C motif chemokine 25 levels	ebi-a-GCST90027164	Amyotrophic lateral sclerosis || id:ebi-a-GCST90027164	90274768	MR Egger	11	0.0264091	0.0417536	0.542794	1.02676	0.94608	1.11432	8.08763	9	0.52534	-0.0157418	0.208929	0.502
139	C-C motif chemokine 25 levels	ebi-a-GCST90027164	Amyotrophic lateral sclerosis || id:ebi-a-GCST90027164	90274768	Weighted median	11	-0.0285687	0.0211916	0.177621	0.971835	0.932297	1.01305	8.08763	9	0.52534	-0.0157418	0.208929	0.502
140	C-C motif chemokine 25 levels	ebi-a-GCST90027164	Amyotrophic lateral sclerosis || id:ebi-a-GCST90027164	90274768	Inverse variance weighted	11	-0.0252541	0.0169194	0.135538	0.975062	0.943257	1.00794	8.08763	9	0.52534	-0.0157418	0.208929	0.502
141	C-C motif chemokine 25 levels	ebi-a-GCST90027164	Amyotrophic lateral sclerosis || id:ebi-a-GCST90027164	90274768	Simple mode	11	-0.0087557	0.0291003	0.769668	0.991283	0.936325	1.04947	8.08763	9	0.52534	-0.0157418	0.208929	0.502
142	C-C motif chemokine 25 levels	ebi-a-GCST90027164	Amyotrophic lateral sclerosis || id:ebi-a-GCST90027164	90274768	Weighted mode	11	-0.0160089	0.0206984	0.457158	0.984119	0.944993	1.02486	8.08763	9	0.52534	-0.0157418	0.208929	0.502
143	Leukemia inhibitory factor receptor levels	ebi-a-GCST90027164	Amyotrophic lateral sclerosis || id:ebi-a-GCST90027164	90274820	MR Egger	3	-0.116892	0.121068	0.511172	0.889681	0.701744	1.12795	2.06387	1	0.150827	0.00323783	0.912886	#N/A
144	Leukemia inhibitory factor receptor levels	ebi-a-GCST90027164	Amyotrophic lateral sclerosis || id:ebi-a-GCST90027164	90274820	Weighted median	3	-0.092873	0.0443006	0.0360445	0.911309	0.835519	0.993975	2.06387	1	0.150827	0.00323783	0.912886	#N/A
145	Leukemia inhibitory factor receptor levels	ebi-a-GCST90027164	Amyotrophic lateral sclerosis || id:ebi-a-GCST90027164	90274820	Inverse variance weighted	3	-0.102407	0.0427793	0.0166727	0.902662	0.830062	0.981612	2.06387	1	0.150827	0.00323783	0.912886	#N/A
146	Leukemia inhibitory factor receptor levels	ebi-a-GCST90027164	Amyotrophic lateral sclerosis || id:ebi-a-GCST90027164	90274820	Simple mode	3	-0.0588159	0.0686789	0.482012	0.94288	0.82413	1.07874	2.06387	1	0.150827	0.00323783	0.912886	#N/A
147	Leukemia inhibitory factor receptor levels	ebi-a-GCST90027164	Amyotrophic lateral sclerosis || id:ebi-a-GCST90027164	90274820	Weighted mode	3	-0.077563	0.0473296	0.242926	0.925369	0.843387	1.01532	2.06387	1	0.150827	0.00323783	0.912886	#N/A
148	Natural killer cell receptor 2B4 levels	ebi-a-GCST90027164	Amyotrophic lateral sclerosis || id:ebi-a-GCST90027164	90274771	MR Egger	7	0.0821118	0.105923	0.473271	1.08558	0.882058	1.33606	7.24602	5	0.202977	-0.00671339	0.590658	0.316
149	Natural killer cell receptor 2B4 levels	ebi-a-GCST90027164	Amyotrophic lateral sclerosis || id:ebi-a-GCST90027164	90274771	Weighted median	7	0.0406674	0.046129	0.377992	1.04151	0.951472	1.14006	7.24602	5	0.202977	-0.00671339	0.590658	0.316
150	Natural killer cell receptor 2B4 levels	ebi-a-GCST90027164	Amyotrophic lateral sclerosis || id:ebi-a-GCST90027164	90274771	Inverse variance weighted	7	0.0281765	0.0461592	0.541583	1.02858	0.939605	1.12597	7.24602	5	0.202977	-0.00671339	0.590658	0.316
151	Natural killer cell receptor 2B4 levels	ebi-a-GCST90027164	Amyotrophic lateral sclerosis || id:ebi-a-GCST90027164	90274771	Simple mode	7	-0.0344311	0.102443	0.748238	0.966155	0.790397	1.181	7.24602	5	0.202977	-0.00671339	0.590658	0.316
152	Natural killer cell receptor 2B4 levels	ebi-a-GCST90027164	Amyotrophic lateral sclerosis || id:ebi-a-GCST90027164	90274771	Weighted mode	7	0.0548826	0.0536943	0.346151	1.05642	0.950889	1.17366	7.24602	5	0.202977	-0.00671339	0.590658	0.316
153	TNF-related activation-induced cytokine levels	ebi-a-GCST90027164	Amyotrophic lateral sclerosis || id:ebi-a-GCST90027164	90274844	MR Egger	7	0.127776	0.115659	0.319568	1.1363	0.905818	1.42542	8.64482	5	0.124098	-0.0202223	0.288926	0.124
154	TNF-related activation-induced cytokine levels	ebi-a-GCST90027164	Amyotrophic lateral sclerosis || id:ebi-a-GCST90027164	90274844	Weighted median	7	0.0452881	0.0451409	0.315734	1.04633	0.957731	1.14312	8.64482	5	0.124098	-0.0202223	0.288926	0.124
155	TNF-related activation-induced cytokine levels	ebi-a-GCST90027164	Amyotrophic lateral sclerosis || id:ebi-a-GCST90027164	90274844	Inverse variance weighted	7	0.00200187	0.0476844	0.966513	1.002	0.912598	1.10017	8.64482	5	0.124098	-0.0202223	0.288926	0.124
156	TNF-related activation-induced cytokine levels	ebi-a-GCST90027164	Amyotrophic lateral sclerosis || id:ebi-a-GCST90027164	90274844	Simple mode	7	0.0596389	0.0572826	0.337936	1.06145	0.948726	1.18757	8.64482	5	0.124098	-0.0202223	0.288926	0.124
157	TNF-related activation-induced cytokine levels	ebi-a-GCST90027164	Amyotrophic lateral sclerosis || id:ebi-a-GCST90027164	90274844	Weighted mode	7	0.0554812	0.0500854	0.310398	1.05705	0.958212	1.16608	8.64482	5	0.124098	-0.0202223	0.288926	0.124
158	Fibroblast growth factor 23 levels	ebi-a-GCST90027164	Amyotrophic lateral sclerosis || id:ebi-a-GCST90027164	90274789	Inverse variance weighted	2	0.0523147	0.0863643	0.544684	1.05371	0.889621	1.24806	#N/A	#N/A	#N/A	NA	NA	#N/A
159	Matrix metalloproteinase-10 levels	ebi-a-GCST90027164	Amyotrophic lateral sclerosis || id:ebi-a-GCST90027164	90274827	MR Egger	9	0.0230832	0.0351692	0.532576	1.02335	0.955187	1.09638	6.6137	7	0.470177	0.00406236	0.688461	0.618
160	Matrix metalloproteinase-10 levels	ebi-a-GCST90027164	Amyotrophic lateral sclerosis || id:ebi-a-GCST90027164	90274827	Weighted median	9	0.0228874	0.0294456	0.436995	1.02315	0.965774	1.08394	6.6137	7	0.470177	0.00406236	0.688461	0.618
161	Matrix metalloproteinase-10 levels	ebi-a-GCST90027164	Amyotrophic lateral sclerosis || id:ebi-a-GCST90027164	90274827	Inverse variance weighted	9	0.0340783	0.0233455	0.144363	1.03467	0.988389	1.08311	6.6137	7	0.470177	0.00406236	0.688461	0.618
162	Matrix metalloproteinase-10 levels	ebi-a-GCST90027164	Amyotrophic lateral sclerosis || id:ebi-a-GCST90027164	90274827	Simple mode	9	0.01338	0.0476621	0.786044	1.01347	0.923082	1.11271	6.6137	7	0.470177	0.00406236	0.688461	0.618
163	Matrix metalloproteinase-10 levels	ebi-a-GCST90027164	Amyotrophic lateral sclerosis || id:ebi-a-GCST90027164	90274827	Weighted mode	9	0.0218343	0.0276787	0.452942	1.02207	0.968104	1.07905	6.6137	7	0.470177	0.00406236	0.688461	0.618
164	CD40L receptor levels	ebi-a-GCST90027164	Amyotrophic lateral sclerosis || id:ebi-a-GCST90027164	90274772	MR Egger	6	0.051917	0.064086	0.463316	1.05329	0.928958	1.19426	9.87683	4	0.0425544	-0.00746737	0.634449	0.271
165	CD40L receptor levels	ebi-a-GCST90027164	Amyotrophic lateral sclerosis || id:ebi-a-GCST90027164	90274772	Weighted median	6	0.0371179	0.0284391	0.191834	1.03782	0.98155	1.09731	9.87683	4	0.0425544	-0.00746737	0.634449	0.271
166	CD40L receptor levels	ebi-a-GCST90027164	Amyotrophic lateral sclerosis || id:ebi-a-GCST90027164	90274772	Inverse variance weighted	6	0.0266986	0.0380567	0.482961	1.02706	0.953236	1.1066	9.87683	4	0.0425544	-0.00746737	0.634449	0.271
167	CD40L receptor levels	ebi-a-GCST90027164	Amyotrophic lateral sclerosis || id:ebi-a-GCST90027164	90274772	Simple mode	6	0.0807284	0.0626863	0.25419	1.08408	0.958739	1.2258	9.87683	4	0.0425544	-0.00746737	0.634449	0.271
168	CD40L receptor levels	ebi-a-GCST90027164	Amyotrophic lateral sclerosis || id:ebi-a-GCST90027164	90274772	Weighted mode	6	0.0404154	0.0280276	0.208882	1.04124	0.985586	1.10004	9.87683	4	0.0425544	-0.00746737	0.634449	0.271
169	T-cell surface glycoprotein CD5 levels	ebi-a-GCST90027164	Amyotrophic lateral sclerosis || id:ebi-a-GCST90027164	90274773	MR Egger	6	-0.291338	0.489817	0.583997	0.747263	0.28611	1.9517	7.36901	4	0.117626	0.0319576	0.618155	0.204
170	T-cell surface glycoprotein CD5 levels	ebi-a-GCST90027164	Amyotrophic lateral sclerosis || id:ebi-a-GCST90027164	90274773	Weighted median	6	-0.0651342	0.0662019	0.325178	0.936942	0.822925	1.06676	7.36901	4	0.117626	0.0319576	0.618155	0.204
171	T-cell surface glycoprotein CD5 levels	ebi-a-GCST90027164	Amyotrophic lateral sclerosis || id:ebi-a-GCST90027164	90274773	Inverse variance weighted	6	-0.0298271	0.0653835	0.648255	0.970613	0.853868	1.10332	7.36901	4	0.117626	0.0319576	0.618155	0.204
172	T-cell surface glycoprotein CD5 levels	ebi-a-GCST90027164	Amyotrophic lateral sclerosis || id:ebi-a-GCST90027164	90274773	Simple mode	6	-0.052702	0.0889796	0.579422	0.948663	0.79684	1.12941	7.36901	4	0.117626	0.0319576	0.618155	0.204
173	T-cell surface glycoprotein CD5 levels	ebi-a-GCST90027164	Amyotrophic lateral sclerosis || id:ebi-a-GCST90027164	90274773	Weighted mode	6	-0.0802753	0.0689911	0.297105	0.922862	0.80614	1.05648	7.36901	4	0.117626	0.0319576	0.618155	0.204
174	Fractalkine levels	ebi-a-GCST90027164	Amyotrophic lateral sclerosis || id:ebi-a-GCST90027164	90274778	MR Egger	4	0.0661969	0.381949	0.878359	1.06844	0.505391	2.25876	2.68784	2	0.260822	-0.0178474	0.69586	0.464
175	Fractalkine levels	ebi-a-GCST90027164	Amyotrophic lateral sclerosis || id:ebi-a-GCST90027164	90274778	Weighted median	4	-0.134633	0.0906127	0.137331	0.874037	0.731811	1.0439	2.68784	2	0.260822	-0.0178474	0.69586	0.464
176	Fractalkine levels	ebi-a-GCST90027164	Amyotrophic lateral sclerosis || id:ebi-a-GCST90027164	90274778	Inverse variance weighted	4	-0.101926	0.0733724	0.164785	0.903097	0.782129	1.04277	2.68784	2	0.260822	-0.0178474	0.69586	0.464
177	Fractalkine levels	ebi-a-GCST90027164	Amyotrophic lateral sclerosis || id:ebi-a-GCST90027164	90274778	Simple mode	4	-0.184203	0.146151	0.296656	0.831767	0.62459	1.10766	2.68784	2	0.260822	-0.0178474	0.69586	0.464
178	Fractalkine levels	ebi-a-GCST90027164	Amyotrophic lateral sclerosis || id:ebi-a-GCST90027164	90274778	Weighted mode	4	-0.18766	0.120879	0.218361	0.828896	0.654043	1.0505	2.68784	2	0.260822	-0.0178474	0.69586	0.464
179	Interleukin-17C levels	ebi-a-GCST90027164	Amyotrophic lateral sclerosis || id:ebi-a-GCST90027164	90274802	Inverse variance weighted	2	0.181139	0.091331	0.0473315	1.19858	1.00213	1.43354	#N/A	#N/A	#N/A	NA	NA	#N/A
180	Matrix metalloproteinase-1 levels	ebi-a-GCST90027164	Amyotrophic lateral sclerosis || id:ebi-a-GCST90027164	90274826	MR Egger	14	0.0957226	0.0692931	0.192331	1.10045	0.960701	1.26054	17.9648	12	0.116764	-0.0185164	0.0749824	0.031
181	Matrix metalloproteinase-1 levels	ebi-a-GCST90027164	Amyotrophic lateral sclerosis || id:ebi-a-GCST90027164	90274826	Weighted median	14	-0.00263896	0.0497416	0.957689	0.997365	0.904718	1.0995	17.9648	12	0.116764	-0.0185164	0.0749824	0.031
182	Matrix metalloproteinase-1 levels	ebi-a-GCST90027164	Amyotrophic lateral sclerosis || id:ebi-a-GCST90027164	90274826	Inverse variance weighted	14	-0.0162467	0.042742	0.703864	0.983885	0.904818	1.06986	17.9648	12	0.116764	-0.0185164	0.0749824	0.031
183	Matrix metalloproteinase-1 levels	ebi-a-GCST90027164	Amyotrophic lateral sclerosis || id:ebi-a-GCST90027164	90274826	Simple mode	14	-0.133737	0.106793	0.232521	0.87482	0.709602	1.07851	17.9648	12	0.116764	-0.0185164	0.0749824	0.031
184	Matrix metalloproteinase-1 levels	ebi-a-GCST90027164	Amyotrophic lateral sclerosis || id:ebi-a-GCST90027164	90274826	Weighted mode	14	0.103388	0.0701504	0.164332	1.10892	0.966469	1.27237	17.9648	12	0.116764	-0.0185164	0.0749824	0.031
185	CUB domain-containing protein 1 levels	ebi-a-GCST90027164	Amyotrophic lateral sclerosis || id:ebi-a-GCST90027164	90274775	MR Egger	4	-0.0028681	0.0749665	0.972957	0.997136	0.860878	1.15496	0.711266	2	0.70073	-0.0082264	0.611875	0.697
186	CUB domain-containing protein 1 levels	ebi-a-GCST90027164	Amyotrophic lateral sclerosis || id:ebi-a-GCST90027164	90274775	Weighted median	4	-0.0533145	0.0403097	0.185961	0.948082	0.876059	1.02603	0.711266	2	0.70073	-0.0082264	0.611875	0.697
187	CUB domain-containing protein 1 levels	ebi-a-GCST90027164	Amyotrophic lateral sclerosis || id:ebi-a-GCST90027164	90274775	Inverse variance weighted	4	-0.0418315	0.0366074	0.253161	0.959031	0.892631	1.03037	0.711266	2	0.70073	-0.0082264	0.611875	0.697
188	CUB domain-containing protein 1 levels	ebi-a-GCST90027164	Amyotrophic lateral sclerosis || id:ebi-a-GCST90027164	90274775	Simple mode	4	-0.0844937	0.0628427	0.271401	0.918977	0.812479	1.03944	0.711266	2	0.70073	-0.0082264	0.611875	0.697
189	CUB domain-containing protein 1 levels	ebi-a-GCST90027164	Amyotrophic lateral sclerosis || id:ebi-a-GCST90027164	90274775	Weighted mode	4	-0.00858233	0.0452245	0.861602	0.991454	0.907354	1.08335	0.711266	2	0.70073	-0.0082264	0.611875	0.697
190	C-X-C motif chemokine 5 levels	ebi-a-GCST90027164	Amyotrophic lateral sclerosis || id:ebi-a-GCST90027164	90274782	MR Egger	5	0.02476	0.0467625	0.633149	1.02507	0.935294	1.12346	1.27527	3	0.735014	0.0034502	0.723605	0.869
191	C-X-C motif chemokine 5 levels	ebi-a-GCST90027164	Amyotrophic lateral sclerosis || id:ebi-a-GCST90027164	90274782	Weighted median	5	0.0340118	0.0336936	0.312762	1.0346	0.96848	1.10523	1.27527	3	0.735014	0.0034502	0.723605	0.869
192	C-X-C motif chemokine 5 levels	ebi-a-GCST90027164	Amyotrophic lateral sclerosis || id:ebi-a-GCST90027164	90274782	Inverse variance weighted	5	0.0383586	0.0310045	0.216016	1.0391	0.977839	1.10421	1.27527	3	0.735014	0.0034502	0.723605	0.869
193	C-X-C motif chemokine 5 levels	ebi-a-GCST90027164	Amyotrophic lateral sclerosis || id:ebi-a-GCST90027164	90274782	Simple mode	5	0.0525371	0.0615291	0.441303	1.05394	0.934204	1.18903	1.27527	3	0.735014	0.0034502	0.723605	0.869
194	C-X-C motif chemokine 5 levels	ebi-a-GCST90027164	Amyotrophic lateral sclerosis || id:ebi-a-GCST90027164	90274782	Weighted mode	5	0.033034	0.0364839	0.416439	1.03359	0.962256	1.1102	1.27527	3	0.735014	0.0034502	0.723605	0.869
195	Tumor necrosis factor ligand superfamily member 12 levels	ebi-a-GCST90027164	Amyotrophic lateral sclerosis || id:ebi-a-GCST90027164	90274846	MR Egger	7	0.342467	0.130043	0.0463381	1.40842	1.09153	1.8173	8.75826	5	0.119104	-0.045972	0.0601984	0.037
196	Tumor necrosis factor ligand superfamily member 12 levels	ebi-a-GCST90027164	Amyotrophic lateral sclerosis || id:ebi-a-GCST90027164	90274846	Weighted median	7	0.0966973	0.0605824	0.11046	1.10153	0.978197	1.24041	8.75826	5	0.119104	-0.045972	0.0601984	0.037
197	Tumor necrosis factor ligand superfamily member 12 levels	ebi-a-GCST90027164	Amyotrophic lateral sclerosis || id:ebi-a-GCST90027164	90274846	Inverse variance weighted	7	0.0533659	0.0689255	0.438781	1.05482	0.921522	1.20739	8.75826	5	0.119104	-0.045972	0.0601984	0.037
198	Tumor necrosis factor ligand superfamily member 12 levels	ebi-a-GCST90027164	Amyotrophic lateral sclerosis || id:ebi-a-GCST90027164	90274846	Simple mode	7	-0.0963066	0.148287	0.54009	0.908186	0.679126	1.2145	8.75826	5	0.119104	-0.045972	0.0601984	0.037
199	Tumor necrosis factor ligand superfamily member 12 levels	ebi-a-GCST90027164	Amyotrophic lateral sclerosis || id:ebi-a-GCST90027164	90274846	Weighted mode	7	0.18135	0.0567442	0.0186959	1.19884	1.07265	1.33987	8.75826	5	0.119104	-0.045972	0.0601984	0.037
200	Interleukin-15 receptor subunit alpha levels	ebi-a-GCST90027164	Amyotrophic lateral sclerosis || id:ebi-a-GCST90027164	90274800	MR Egger	8	0.0371383	0.0457769	0.448178	1.03784	0.948774	1.13526	5.45023	6	0.487492	-0.00587345	0.592141	0.669
201	Interleukin-15 receptor subunit alpha levels	ebi-a-GCST90027164	Amyotrophic lateral sclerosis || id:ebi-a-GCST90027164	90274800	Weighted median	8	0.022408	0.0264832	0.397485	1.02266	0.970932	1.07715	5.45023	6	0.487492	-0.00587345	0.592141	0.669
202	Interleukin-15 receptor subunit alpha levels	ebi-a-GCST90027164	Amyotrophic lateral sclerosis || id:ebi-a-GCST90027164	90274800	Inverse variance weighted	8	0.0146244	0.0226123	0.517797	1.01473	0.970741	1.06072	5.45023	6	0.487492	-0.00587345	0.592141	0.669
203	Interleukin-15 receptor subunit alpha levels	ebi-a-GCST90027164	Amyotrophic lateral sclerosis || id:ebi-a-GCST90027164	90274800	Simple mode	8	0.0280612	0.0446207	0.549389	1.02846	0.942334	1.12245	5.45023	6	0.487492	-0.00587345	0.592141	0.669
204	Interleukin-15 receptor subunit alpha levels	ebi-a-GCST90027164	Amyotrophic lateral sclerosis || id:ebi-a-GCST90027164	90274800	Weighted mode	8	0.02223	0.0264125	0.4278	1.02248	0.970893	1.07681	5.45023	6	0.487492	-0.00587345	0.592141	0.669
205	C-X-C motif chemokine 9 levels	ebi-a-GCST90027164	Amyotrophic lateral sclerosis || id:ebi-a-GCST90027164	90274784	MR Egger	4	0.596524	0.508595	0.361624	1.8158	0.670104	4.92031	2.63689	2	0.267551	-0.0778577	0.357203	0.358
206	C-X-C motif chemokine 9 levels	ebi-a-GCST90027164	Amyotrophic lateral sclerosis || id:ebi-a-GCST90027164	90274784	Weighted median	4	0.0270619	0.0740973	0.714947	1.02743	0.888546	1.18803	2.63689	2	0.267551	-0.0778577	0.357203	0.358
207	C-X-C motif chemokine 9 levels	ebi-a-GCST90027164	Amyotrophic lateral sclerosis || id:ebi-a-GCST90027164	90274784	Inverse variance weighted	4	-0.000981128	0.0765183	0.98977	0.999019	0.859885	1.16067	2.63689	2	0.267551	-0.0778577	0.357203	0.358
208	C-X-C motif chemokine 9 levels	ebi-a-GCST90027164	Amyotrophic lateral sclerosis || id:ebi-a-GCST90027164	90274784	Simple mode	4	0.123903	0.118076	0.371093	1.13191	0.898054	1.42665	2.63689	2	0.267551	-0.0778577	0.357203	0.358
209	C-X-C motif chemokine 9 levels	ebi-a-GCST90027164	Amyotrophic lateral sclerosis || id:ebi-a-GCST90027164	90274784	Weighted mode	4	0.00385144	0.0868084	0.9674	1.00386	0.846798	1.19005	2.63689	2	0.267551	-0.0778577	0.357203	0.358
210	Monocyte chemoattractant protein 2 levels	ebi-a-GCST90027164	Amyotrophic lateral sclerosis || id:ebi-a-GCST90027164	90274822	MR Egger	11	-0.0115241	0.026666	0.675792	0.988542	0.938203	1.04158	6.08932	9	0.730946	0.00126332	0.911231	0.816
211	Monocyte chemoattractant protein 2 levels	ebi-a-GCST90027164	Amyotrophic lateral sclerosis || id:ebi-a-GCST90027164	90274822	Weighted median	11	-0.00202897	0.0206734	0.921818	0.997973	0.958344	1.03924	6.08932	9	0.730946	0.00126332	0.911231	0.816
212	Monocyte chemoattractant protein 2 levels	ebi-a-GCST90027164	Amyotrophic lateral sclerosis || id:ebi-a-GCST90027164	90274822	Inverse variance weighted	11	-0.00912525	0.0165344	0.58102	0.990916	0.959318	1.02356	6.08932	9	0.730946	0.00126332	0.911231	0.816
213	Monocyte chemoattractant protein 2 levels	ebi-a-GCST90027164	Amyotrophic lateral sclerosis || id:ebi-a-GCST90027164	90274822	Simple mode	11	-0.0159603	0.0321319	0.630129	0.984166	0.924096	1.04814	6.08932	9	0.730946	0.00126332	0.911231	0.816
214	Monocyte chemoattractant protein 2 levels	ebi-a-GCST90027164	Amyotrophic lateral sclerosis || id:ebi-a-GCST90027164	90274822	Weighted mode	11	-0.0132951	0.0207977	0.537024	0.986793	0.947377	1.02785	6.08932	9	0.730946	0.00126332	0.911231	0.816
215	Glial cell line-derived neurotrophic factor levels	ebi-a-GCST90027164	Amyotrophic lateral sclerosis || id:ebi-a-GCST90027164	90274792	MR Egger	9	-0.132294	0.0566948	0.052348	0.876083	0.783945	0.97905	6.5179	7	0.480736	0.0151055	0.180966	0.372
216	Glial cell line-derived neurotrophic factor levels	ebi-a-GCST90027164	Amyotrophic lateral sclerosis || id:ebi-a-GCST90027164	90274792	Weighted median	9	-0.107685	0.0427533	0.0117774	0.897911	0.825735	0.976395	6.5179	7	0.480736	0.0151055	0.180966	0.372
217	Glial cell line-derived neurotrophic factor levels	ebi-a-GCST90027164	Amyotrophic lateral sclerosis || id:ebi-a-GCST90027164	90274792	Inverse variance weighted	9	-0.064771	0.0353913	0.0672296	0.937282	0.874469	1.00461	6.5179	7	0.480736	0.0151055	0.180966	0.372
218	Glial cell line-derived neurotrophic factor levels	ebi-a-GCST90027164	Amyotrophic lateral sclerosis || id:ebi-a-GCST90027164	90274792	Simple mode	9	-0.102788	0.0886806	0.279846	0.902318	0.758356	1.07361	6.5179	7	0.480736	0.0151055	0.180966	0.372
219	Glial cell line-derived neurotrophic factor levels	ebi-a-GCST90027164	Amyotrophic lateral sclerosis || id:ebi-a-GCST90027164	90274792	Weighted mode	9	-0.113958	0.0467365	0.0406723	0.892296	0.81419	0.977894	6.5179	7	0.480736	0.0151055	0.180966	0.372
220	Tumor necrosis factor receptor superfamily member 9 levels	ebi-a-GCST90027164	Amyotrophic lateral sclerosis || id:ebi-a-GCST90027164	90274841	Inverse variance weighted	2	-0.0745343	0.0733531	0.30958	0.928176	0.803879	1.07169	#N/A	#N/A	#N/A	NA	NA	#N/A
221	Interleukin-18 levels	ebi-a-GCST90027164	Amyotrophic lateral sclerosis || id:ebi-a-GCST90027164	90274803	MR Egger	3	-0.0797287	0.176036	0.729263	0.923367	0.653928	1.30382	0.775553	1	0.378505	0.0138699	0.731512	#N/A
222	Interleukin-18 levels	ebi-a-GCST90027164	Amyotrophic lateral sclerosis || id:ebi-a-GCST90027164	90274803	Weighted median	3	-0.00055474	0.0499807	0.991144	0.999445	0.90618	1.10231	0.775553	1	0.378505	0.0138699	0.731512	#N/A
223	Interleukin-18 levels	ebi-a-GCST90027164	Amyotrophic lateral sclerosis || id:ebi-a-GCST90027164	90274803	Inverse variance weighted	3	-0.0031717	0.0432739	0.941573	0.996833	0.915771	1.08507	0.775553	1	0.378505	0.0138699	0.731512	#N/A
224	Interleukin-18 levels	ebi-a-GCST90027164	Amyotrophic lateral sclerosis || id:ebi-a-GCST90027164	90274803	Simple mode	3	0.0394898	0.0679167	0.619741	1.04028	0.910622	1.1884	0.775553	1	0.378505	0.0138699	0.731512	#N/A
225	Interleukin-18 levels	ebi-a-GCST90027164	Amyotrophic lateral sclerosis || id:ebi-a-GCST90027164	90274803	Weighted mode	3	0.0353649	0.0575014	0.601191	1.036	0.925577	1.15959	0.775553	1	0.378505	0.0138699	0.731512	#N/A
226	Interleukin-10 receptor subunit beta levels	ebi-a-GCST90027164	Amyotrophic lateral sclerosis || id:ebi-a-GCST90027164	90274797	MR Egger	6	0.0378081	0.0573443	0.545717	1.03853	0.928127	1.16207	5.42061	4	0.246796	-0.0166014	0.348877	0.392
227	Interleukin-10 receptor subunit beta levels	ebi-a-GCST90027164	Amyotrophic lateral sclerosis || id:ebi-a-GCST90027164	90274797	Weighted median	6	-0.00260649	0.0265458	0.921783	0.997397	0.946829	1.05067	5.42061	4	0.246796	-0.0166014	0.348877	0.392
228	Interleukin-10 receptor subunit beta levels	ebi-a-GCST90027164	Amyotrophic lateral sclerosis || id:ebi-a-GCST90027164	90274797	Inverse variance weighted	6	-0.0145494	0.0294953	0.621815	0.985556	0.930196	1.04421	5.42061	4	0.246796	-0.0166014	0.348877	0.392
229	Interleukin-10 receptor subunit beta levels	ebi-a-GCST90027164	Amyotrophic lateral sclerosis || id:ebi-a-GCST90027164	90274797	Simple mode	6	-0.0321895	0.0571193	0.597397	0.968323	0.865764	1.08303	5.42061	4	0.246796	-0.0166014	0.348877	0.392
230	Interleukin-10 receptor subunit beta levels	ebi-a-GCST90027164	Amyotrophic lateral sclerosis || id:ebi-a-GCST90027164	90274797	Weighted mode	6	-0.00158881	0.0276608	0.95642	0.998412	0.945724	1.05404	5.42061	4	0.246796	-0.0166014	0.348877	0.392
231	Interleukin-1-alpha levels	ebi-a-GCST90027164	Amyotrophic lateral sclerosis || id:ebi-a-GCST90027164	90274805	Wald ratio	1	-0.1741	0.303906	0.56673	0.840213	0.463126	1.52433	#N/A	#N/A	#N/A	#N/A	#N/A	#N/A
232	Interleukin-13 levels	ebi-a-GCST90027164	Amyotrophic lateral sclerosis || id:ebi-a-GCST90027164	90274799	Wald ratio	1	0.152909	0.14885	0.304292	1.16522	0.870371	1.55995	#N/A	#N/A	#N/A	#N/A	#N/A	#N/A
233	Interleukin-20 receptor subunit alpha levels	ebi-a-GCST90027164	Amyotrophic lateral sclerosis || id:ebi-a-GCST90027164	90274808	Wald ratio	1	0.1076	0.146883	0.463828	1.1136	0.835028	1.48511	#N/A	#N/A	#N/A	#N/A	#N/A	#N/A
234	Interleukin-12 subunit beta levels	ebi-a-GCST90027164	Amyotrophic lateral sclerosis || id:ebi-a-GCST90027164	90274798	MR Egger	13	3.63899e-05	0.068895	0.999588	1.00004	0.873718	1.14462	12.5627	11	0.322861	-0.00011248	0.990553	0.444
235	Interleukin-12 subunit beta levels	ebi-a-GCST90027164	Amyotrophic lateral sclerosis || id:ebi-a-GCST90027164	90274798	Weighted median	13	0.00713517	0.0382183	0.8519	1.00716	0.934473	1.0855	12.5627	11	0.322861	-0.00011248	0.990553	0.444
236	Interleukin-12 subunit beta levels	ebi-a-GCST90027164	Amyotrophic lateral sclerosis || id:ebi-a-GCST90027164	90274798	Inverse variance weighted	13	-0.000710873	0.0293626	0.980685	0.999289	0.943403	1.05849	12.5627	11	0.322861	-0.00011248	0.990553	0.444
237	Interleukin-12 subunit beta levels	ebi-a-GCST90027164	Amyotrophic lateral sclerosis || id:ebi-a-GCST90027164	90274798	Simple mode	13	-0.0324925	0.0798359	0.691181	0.96803	0.827811	1.132	12.5627	11	0.322861	-0.00011248	0.990553	0.444
238	Interleukin-12 subunit beta levels	ebi-a-GCST90027164	Amyotrophic lateral sclerosis || id:ebi-a-GCST90027164	90274798	Weighted mode	13	0.000616745	0.0446064	0.989196	1.00062	0.91685	1.09204	12.5627	11	0.322861	-0.00011248	0.990553	0.444
239	Delta and Notch-like epidermal growth factor-related receptor levels	ebi-a-GCST90027164	Amyotrophic lateral sclerosis || id:ebi-a-GCST90027164	90274785	MR Egger	6	-0.014968	0.0922279	0.878943	0.985143	0.82223	1.18034	3.83784	4	0.428396	-0.000306352	0.98004	0.582
240	Delta and Notch-like epidermal growth factor-related receptor levels	ebi-a-GCST90027164	Amyotrophic lateral sclerosis || id:ebi-a-GCST90027164	90274785	Weighted median	6	-0.00371015	0.0491848	0.93987	0.996297	0.904736	1.09712	3.83784	4	0.428396	-0.000306352	0.98004	0.582
241	Delta and Notch-like epidermal growth factor-related receptor levels	ebi-a-GCST90027164	Amyotrophic lateral sclerosis || id:ebi-a-GCST90027164	90274785	Inverse variance weighted	6	-0.0171721	0.0406011	0.672333	0.982974	0.907783	1.06439	3.83784	4	0.428396	-0.000306352	0.98004	0.582
242	Delta and Notch-like epidermal growth factor-related receptor levels	ebi-a-GCST90027164	Amyotrophic lateral sclerosis || id:ebi-a-GCST90027164	90274785	Simple mode	6	0.0523384	0.0834165	0.55791	1.05373	0.894797	1.2409	3.83784	4	0.428396	-0.000306352	0.98004	0.582
243	Delta and Notch-like epidermal growth factor-related receptor levels	ebi-a-GCST90027164	Amyotrophic lateral sclerosis || id:ebi-a-GCST90027164	90274785	Weighted mode	6	0.0247572	0.0576086	0.685269	1.02507	0.915618	1.1476	3.83784	4	0.428396	-0.000306352	0.98004	0.582
244	Monocyte chemoattractant protein-3 levels	ebi-a-GCST90027164	Amyotrophic lateral sclerosis || id:ebi-a-GCST90027164	90274823	MR Egger	6	0.0379935	0.0977278	0.717255	1.03872	0.857655	1.25802	0.956207	4	0.916362	-0.00769743	0.536597	0.926
245	Monocyte chemoattractant protein-3 levels	ebi-a-GCST90027164	Amyotrophic lateral sclerosis || id:ebi-a-GCST90027164	90274823	Weighted median	6	-0.0033629	0.0535203	0.949899	0.996643	0.897392	1.10687	0.956207	4	0.916362	-0.00769743	0.536597	0.926
246	Monocyte chemoattractant protein-3 levels	ebi-a-GCST90027164	Amyotrophic lateral sclerosis || id:ebi-a-GCST90027164	90274823	Inverse variance weighted	6	-0.0204929	0.0452372	0.650541	0.979716	0.896589	1.07055	0.956207	4	0.916362	-0.00769743	0.536597	0.926
247	Monocyte chemoattractant protein-3 levels	ebi-a-GCST90027164	Amyotrophic lateral sclerosis || id:ebi-a-GCST90027164	90274823	Simple mode	6	0.0124075	0.0799816	0.882787	1.01248	0.865579	1.18432	0.956207	4	0.916362	-0.00769743	0.536597	0.926
248	Monocyte chemoattractant protein-3 levels	ebi-a-GCST90027164	Amyotrophic lateral sclerosis || id:ebi-a-GCST90027164	90274823	Weighted mode	6	0.00774714	0.0662049	0.911401	1.00778	0.885136	1.14741	0.956207	4	0.916362	-0.00769743	0.536597	0.926
249	Fibroblast growth factor 5 levels	ebi-a-GCST90027164	Amyotrophic lateral sclerosis || id:ebi-a-GCST90027164	90274790	MR Egger	6	0.0206107	0.0709245	0.785801	1.02082	0.888339	1.17307	7.47343	4	0.112887	0.00826323	0.710479	0.397
250	Fibroblast growth factor 5 levels	ebi-a-GCST90027164	Amyotrophic lateral sclerosis || id:ebi-a-GCST90027164	90274790	Weighted median	6	0.0369431	0.02656	0.164246	1.03763	0.984999	1.09308	7.47343	4	0.112887	0.00826323	0.710479	0.397
251	Fibroblast growth factor 5 levels	ebi-a-GCST90027164	Amyotrophic lateral sclerosis || id:ebi-a-GCST90027164	90274790	Inverse variance weighted	6	0.0452099	0.0319033	0.156456	1.04625	0.982829	1.11376	7.47343	4	0.112887	0.00826323	0.710479	0.397
252	Fibroblast growth factor 5 levels	ebi-a-GCST90027164	Amyotrophic lateral sclerosis || id:ebi-a-GCST90027164	90274790	Simple mode	6	0.0487538	0.100751	0.648903	1.04996	0.861812	1.27919	7.47343	4	0.112887	0.00826323	0.710479	0.397
253	Fibroblast growth factor 5 levels	ebi-a-GCST90027164	Amyotrophic lateral sclerosis || id:ebi-a-GCST90027164	90274790	Weighted mode	6	0.0322791	0.0283008	0.305717	1.03281	0.977076	1.09171	7.47343	4	0.112887	0.00826323	0.710479	0.397
254	SIR2-like protein 2 levels	ebi-a-GCST90027164	Amyotrophic lateral sclerosis || id:ebi-a-GCST90027164	90274834	Wald ratio	1	0.207702	0.108904	0.0564947	1.23085	0.994266	1.52372	#N/A	#N/A	#N/A	#N/A	#N/A	#N/A
255	C-C motif chemokine 4 levels	ebi-a-GCST90027164	Amyotrophic lateral sclerosis || id:ebi-a-GCST90027164	90274770	MR Egger	7	0.0620711	0.0514602	0.281697	1.06404	0.961952	1.17696	5.79007	5	0.327185	-0.0298877	0.123244	0.206
256	C-C motif chemokine 4 levels	ebi-a-GCST90027164	Amyotrophic lateral sclerosis || id:ebi-a-GCST90027164	90274770	Weighted median	7	0.00429124	0.0303198	0.887449	1.0043	0.946357	1.06579	5.79007	5	0.327185	-0.0298877	0.123244	0.206
257	C-C motif chemokine 4 levels	ebi-a-GCST90027164	Amyotrophic lateral sclerosis || id:ebi-a-GCST90027164	90274770	Inverse variance weighted	7	-0.0190808	0.0319793	0.550734	0.9811	0.921493	1.04456	5.79007	5	0.327185	-0.0298877	0.123244	0.206
258	C-C motif chemokine 4 levels	ebi-a-GCST90027164	Amyotrophic lateral sclerosis || id:ebi-a-GCST90027164	90274770	Simple mode	7	-0.0094721	0.0553095	0.869652	0.990573	0.888804	1.10399	5.79007	5	0.327185	-0.0298877	0.123244	0.206
259	C-C motif chemokine 4 levels	ebi-a-GCST90027164	Amyotrophic lateral sclerosis || id:ebi-a-GCST90027164	90274770	Weighted mode	7	0.00725025	0.0295498	0.814357	1.00728	0.950595	1.06734	5.79007	5	0.327185	-0.0298877	0.123244	0.206
260	C-C motif chemokine 20 levels	ebi-a-GCST90027164	Amyotrophic lateral sclerosis || id:ebi-a-GCST90027164	90274766	Inverse variance weighted	2	-0.134961	0.200687	0.501268	0.87375	0.589602	1.29484	#N/A	#N/A	#N/A	NA	NA	#N/A
261	T-cell surface glycoprotein CD6 isoform levels	ebi-a-GCST90027164	Amyotrophic lateral sclerosis || id:ebi-a-GCST90027164	90274774	MR Egger	9	0.0133648	0.040827	0.752974	1.01345	0.935517	1.09789	7.83071	7	0.347758	-0.0073494	0.582647	0.574
262	T-cell surface glycoprotein CD6 isoform levels	ebi-a-GCST90027164	Amyotrophic lateral sclerosis || id:ebi-a-GCST90027164	90274774	Weighted median	9	-0.000767309	0.0227465	0.97309	0.999233	0.955663	1.04479	7.83071	7	0.347758	-0.0073494	0.582647	0.574
263	T-cell surface glycoprotein CD6 isoform levels	ebi-a-GCST90027164	Amyotrophic lateral sclerosis || id:ebi-a-GCST90027164	90274774	Inverse variance weighted	9	-0.00658676	0.0206898	0.750213	0.993435	0.953955	1.03455	7.83071	7	0.347758	-0.0073494	0.582647	0.574
264	T-cell surface glycoprotein CD6 isoform levels	ebi-a-GCST90027164	Amyotrophic lateral sclerosis || id:ebi-a-GCST90027164	90274774	Simple mode	9	-0.0224695	0.0480452	0.652493	0.977781	0.889907	1.07433	7.83071	7	0.347758	-0.0073494	0.582647	0.574
265	T-cell surface glycoprotein CD6 isoform levels	ebi-a-GCST90027164	Amyotrophic lateral sclerosis || id:ebi-a-GCST90027164	90274774	Weighted mode	9	-0.00105217	0.0233789	0.965206	0.998948	0.954207	1.04579	7.83071	7	0.347758	-0.0073494	0.582647	0.574
266	Eotaxin levels	ebi-a-GCST90027164	Amyotrophic lateral sclerosis || id:ebi-a-GCST90027164	90274764	MR Egger	7	0.00559096	0.13524	0.968624	1.00561	0.771453	1.31083	12.8436	5	0.024889	0.00844747	0.662307	0.089
267	Eotaxin levels	ebi-a-GCST90027164	Amyotrophic lateral sclerosis || id:ebi-a-GCST90027164	90274764	Weighted median	7	0.0339881	0.0556055	0.541043	1.03457	0.927745	1.1537	12.8436	5	0.024889	0.00844747	0.662307	0.089
268	Eotaxin levels	ebi-a-GCST90027164	Amyotrophic lateral sclerosis || id:ebi-a-GCST90027164	90274764	Inverse variance weighted	7	0.060299	0.0616589	0.328102	1.06215	0.941244	1.1986	12.8436	5	0.024889	0.00844747	0.662307	0.089
269	Eotaxin levels	ebi-a-GCST90027164	Amyotrophic lateral sclerosis || id:ebi-a-GCST90027164	90274764	Simple mode	7	0.0969206	0.0894409	0.320143	1.10177	0.92461	1.31288	12.8436	5	0.024889	0.00844747	0.662307	0.089
270	Eotaxin levels	ebi-a-GCST90027164	Amyotrophic lateral sclerosis || id:ebi-a-GCST90027164	90274764	Weighted mode	7	0.0378442	0.0598255	0.550342	1.03857	0.923658	1.16778	12.8436	5	0.024889	0.00844747	0.662307	0.089
271	interleukin-18 receptor 1 levels	ebi-a-GCST90027164	Amyotrophic lateral sclerosis || id:ebi-a-GCST90027164	90274804	MR Egger	16	-0.0791934	0.0390165	0.0618348	0.923861	0.855845	0.997283	19.9376	14	0.132122	0.0307229	0.0487604	0.057
272	interleukin-18 receptor 1 levels	ebi-a-GCST90027164	Amyotrophic lateral sclerosis || id:ebi-a-GCST90027164	90274804	Weighted median	16	0.00579045	0.0210341	0.783095	1.00581	0.965184	1.04814	19.9376	14	0.132122	0.0307229	0.0487604	0.057
273	interleukin-18 receptor 1 levels	ebi-a-GCST90027164	Amyotrophic lateral sclerosis || id:ebi-a-GCST90027164	90274804	Inverse variance weighted	16	-0.00441785	0.020011	0.825271	0.995592	0.957299	1.03542	19.9376	14	0.132122	0.0307229	0.0487604	0.057
274	interleukin-18 receptor 1 levels	ebi-a-GCST90027164	Amyotrophic lateral sclerosis || id:ebi-a-GCST90027164	90274804	Simple mode	16	0.0258845	0.0354092	0.476038	1.02622	0.957416	1.09997	19.9376	14	0.132122	0.0307229	0.0487604	0.057
275	interleukin-18 receptor 1 levels	ebi-a-GCST90027164	Amyotrophic lateral sclerosis || id:ebi-a-GCST90027164	90274804	Weighted mode	16	-0.00226926	0.0188951	0.905999	0.997733	0.961459	1.03538	19.9376	14	0.132122	0.0307229	0.0487604	0.057
276	Interleukin-10 levels	ebi-a-GCST90027164	Amyotrophic lateral sclerosis || id:ebi-a-GCST90027164	90274795	MR Egger	5	0.355492	0.320837	0.348704	1.42688	0.760828	2.67603	0.699725	3	0.873269	-0.0534699	0.310053	0.699
277	Interleukin-10 levels	ebi-a-GCST90027164	Amyotrophic lateral sclerosis || id:ebi-a-GCST90027164	90274795	Weighted median	5	-0.00261357	0.0762215	0.972647	0.99739	0.858982	1.1581	0.699725	3	0.873269	-0.0534699	0.310053	0.699
278	Interleukin-10 levels	ebi-a-GCST90027164	Amyotrophic lateral sclerosis || id:ebi-a-GCST90027164	90274795	Inverse variance weighted	5	-0.0281222	0.062065	0.65047	0.97227	0.860906	1.09804	0.699725	3	0.873269	-0.0534699	0.310053	0.699
279	Interleukin-10 levels	ebi-a-GCST90027164	Amyotrophic lateral sclerosis || id:ebi-a-GCST90027164	90274795	Simple mode	5	-0.000773829	0.101441	0.994279	0.999226	0.819059	1.21903	0.699725	3	0.873269	-0.0534699	0.310053	0.699
280	Interleukin-10 levels	ebi-a-GCST90027164	Amyotrophic lateral sclerosis || id:ebi-a-GCST90027164	90274795	Weighted mode	5	0.0165416	0.0929656	0.867424	1.01668	0.847325	1.21988	0.699725	3	0.873269	-0.0534699	0.310053	0.699

## Sheet: S4
Results of Forward Mendelian Randomization Analysis between 91 inflammatory proteins and ALS (snp p<5e-7)
Select snp p_value < 5e-7, clump_kb = 5000, clump_r2 = 0.01, 91 inflammatory proteins are left at 87, and after 1 clump, there are no snp and 86 are left.
	id.exposure	id.outcome	outcome	exposure	method	nsnp	b	se	pval	OR	lower	upper	Q	Q_df	Q_pval(MR Egger)	egger_intercept	pval(egger_intercept)	p mr_presso
1	Tumor necrosis factor ligand superfamily member 14 levels	ebi-a-GCST90027164	Amyotrophic lateral sclerosis || id:ebi-a-GCST90027164	90274842	MR Egger	6	-0.00885959	0.0800298	0.917184	0.99118	0.847285	1.15951	7.11256	4	0.130058	-0.0147259	0.43907	0.232
2	Tumor necrosis factor ligand superfamily member 14 levels	ebi-a-GCST90027164	Amyotrophic lateral sclerosis || id:ebi-a-GCST90027164	90274842	Weighted median	6	-0.0421075	0.0458496	0.358418	0.958767	0.876365	1.04892	7.11256	4	0.130058	-0.0147259	0.43907	0.232
3	Tumor necrosis factor ligand superfamily member 14 levels	ebi-a-GCST90027164	Amyotrophic lateral sclerosis || id:ebi-a-GCST90027164	90274842	Inverse variance weighted	6	-0.0630534	0.04787	0.187778	0.938893	0.854808	1.03125	7.11256	4	0.130058	-0.0147259	0.43907	0.232
4	Tumor necrosis factor ligand superfamily member 14 levels	ebi-a-GCST90027164	Amyotrophic lateral sclerosis || id:ebi-a-GCST90027164	90274842	Simple mode	6	0.0237152	0.0818037	0.783527	1.024	0.872302	1.20208	7.11256	4	0.130058	-0.0147259	0.43907	0.232
5	Tumor necrosis factor ligand superfamily member 14 levels	ebi-a-GCST90027164	Amyotrophic lateral sclerosis || id:ebi-a-GCST90027164	90274842	Weighted mode	6	-0.0305571	0.0504859	0.571425	0.969905	0.878526	1.07079	7.11256	4	0.130058	-0.0147259	0.43907	0.232
6	Leukemia inhibitory factor levels	ebi-a-GCST90027164	Amyotrophic lateral sclerosis || id:ebi-a-GCST90027164	90274819	Wald ratio	1	0.0464886	0.176063	0.791745	1.04759	0.741859	1.47931	#N/A	#N/A	#N/A	#N/A	#N/A	#N/A
7	Fibroblast growth factor 21 levels	ebi-a-GCST90027164	Amyotrophic lateral sclerosis || id:ebi-a-GCST90027164	90274788	MR Egger	6	0.401292	0.226972	0.151789	1.49375	0.957363	2.33067	10.4425	4	0.0335989	-0.0461759	0.157076	0.021
8	Fibroblast growth factor 21 levels	ebi-a-GCST90027164	Amyotrophic lateral sclerosis || id:ebi-a-GCST90027164	90274788	Weighted median	6	0.100934	0.0713159	0.156976	1.1062	0.9619	1.27216	10.4425	4	0.0335989	-0.0461759	0.157076	0.021
9	Fibroblast growth factor 21 levels	ebi-a-GCST90027164	Amyotrophic lateral sclerosis || id:ebi-a-GCST90027164	90274788	Inverse variance weighted	6	0.0378004	0.104742	0.718182	1.03852	0.845782	1.27519	10.4425	4	0.0335989	-0.0461759	0.157076	0.021
10	Fibroblast growth factor 21 levels	ebi-a-GCST90027164	Amyotrophic lateral sclerosis || id:ebi-a-GCST90027164	90274788	Simple mode	6	-0.0289265	0.130137	0.832892	0.971488	0.752771	1.25375	10.4425	4	0.0335989	-0.0461759	0.157076	0.021
11	Fibroblast growth factor 21 levels	ebi-a-GCST90027164	Amyotrophic lateral sclerosis || id:ebi-a-GCST90027164	90274788	Weighted mode	6	0.0847252	0.0661739	0.256603	1.08842	0.956021	1.23915	10.4425	4	0.0335989	-0.0461759	0.157076	0.021
12	C-X-C motif chemokine 1 levels	ebi-a-GCST90027164	Amyotrophic lateral sclerosis || id:ebi-a-GCST90027164	90274779	MR Egger	4	0.00437159	0.0750706	0.958858	1.00438	0.866956	1.16359	2.90212	2	0.234321	0.00261853	0.863744	0.475
13	C-X-C motif chemokine 1 levels	ebi-a-GCST90027164	Amyotrophic lateral sclerosis || id:ebi-a-GCST90027164	90274779	Weighted median	4	0.000104564	0.0396488	0.997896	1.0001	0.925328	1.08092	2.90212	2	0.234321	0.00261853	0.863744	0.475
14	C-X-C motif chemokine 1 levels	ebi-a-GCST90027164	Amyotrophic lateral sclerosis || id:ebi-a-GCST90027164	90274779	Inverse variance weighted	4	0.0157722	0.0389391	0.685442	1.0159	0.941248	1.09647	2.90212	2	0.234321	0.00261853	0.863744	0.475
15	C-X-C motif chemokine 1 levels	ebi-a-GCST90027164	Amyotrophic lateral sclerosis || id:ebi-a-GCST90027164	90274779	Simple mode	4	0.0079097	0.0827172	0.929849	1.00794	0.857087	1.18535	2.90212	2	0.234321	0.00261853	0.863744	0.475
16	C-X-C motif chemokine 1 levels	ebi-a-GCST90027164	Amyotrophic lateral sclerosis || id:ebi-a-GCST90027164	90274779	Weighted mode	4	0.00012846	0.0409254	0.997693	1.00013	0.923038	1.08366	2.90212	2	0.234321	0.00261853	0.863744	0.475
17	C-C motif chemokine 20 levels	ebi-a-GCST90027164	Amyotrophic lateral sclerosis || id:ebi-a-GCST90027164	90274766	MR Egger	3	0.55703	0.419984	0.41128	1.74548	0.766333	3.97569	1.53356	1	0.21558	-0.0861046	0.343851	#N/A
18	C-C motif chemokine 20 levels	ebi-a-GCST90027164	Amyotrophic lateral sclerosis || id:ebi-a-GCST90027164	90274766	Weighted median	3	-0.0630639	0.107865	0.55878	0.938884	0.759967	1.15992	1.53356	1	0.21558	-0.0861046	0.343851	#N/A
19	C-C motif chemokine 20 levels	ebi-a-GCST90027164	Amyotrophic lateral sclerosis || id:ebi-a-GCST90027164	90274766	Inverse variance weighted	3	-0.125301	0.130498	0.336968	0.882232	0.683126	1.13937	1.53356	1	0.21558	-0.0861046	0.343851	#N/A
20	C-C motif chemokine 20 levels	ebi-a-GCST90027164	Amyotrophic lateral sclerosis || id:ebi-a-GCST90027164	90274766	Simple mode	3	-0.0333157	0.190375	0.877193	0.967233	0.66601	1.40469	1.53356	1	0.21558	-0.0861046	0.343851	#N/A
21	C-C motif chemokine 20 levels	ebi-a-GCST90027164	Amyotrophic lateral sclerosis || id:ebi-a-GCST90027164	90274766	Weighted mode	3	0.0144511	0.18607	0.945165	1.01456	0.704515	1.46104	1.53356	1	0.21558	-0.0861046	0.343851	#N/A
22	Eukaryotic translation initiation factor 4E-binding protein 1 levels	ebi-a-GCST90027164	Amyotrophic lateral sclerosis || id:ebi-a-GCST90027164	90274758	MR Egger	3	-0.131819	0.52115	0.842282	0.876499	0.315602	2.43424	2.75225	1	0.0971177	0.0131827	0.855537	#N/A
23	Eukaryotic translation initiation factor 4E-binding protein 1 levels	ebi-a-GCST90027164	Amyotrophic lateral sclerosis || id:ebi-a-GCST90027164	90274758	Weighted median	3	-0.0547229	0.0779886	0.48288	0.946747	0.812548	1.10311	2.75225	1	0.0971177	0.0131827	0.855537	#N/A
24	Eukaryotic translation initiation factor 4E-binding protein 1 levels	ebi-a-GCST90027164	Amyotrophic lateral sclerosis || id:ebi-a-GCST90027164	90274758	Inverse variance weighted	3	-0.0146626	0.0863172	0.865113	0.985444	0.832065	1.1671	2.75225	1	0.0971177	0.0131827	0.855537	#N/A
25	Eukaryotic translation initiation factor 4E-binding protein 1 levels	ebi-a-GCST90027164	Amyotrophic lateral sclerosis || id:ebi-a-GCST90027164	90274758	Simple mode	3	-0.077389	0.103959	0.534205	0.92553	0.754917	1.1347	2.75225	1	0.0971177	0.0131827	0.855537	#N/A
26	Eukaryotic translation initiation factor 4E-binding protein 1 levels	ebi-a-GCST90027164	Amyotrophic lateral sclerosis || id:ebi-a-GCST90027164	90274758	Weighted mode	3	-0.0593365	0.0832606	0.549983	0.94239	0.800493	1.10944	2.75225	1	0.0971177	0.0131827	0.855537	#N/A
27	Interleukin-24 levels	ebi-a-GCST90027164	Amyotrophic lateral sclerosis || id:ebi-a-GCST90027164	90274810	Wald ratio	1	0.209009	0.175676	0.234147	1.23246	0.87344	1.73904	#N/A	#N/A	#N/A	#N/A	#N/A	#N/A
28	C-C motif chemokine 23 levels	ebi-a-GCST90027164	Amyotrophic lateral sclerosis || id:ebi-a-GCST90027164	90274767	MR Egger	10	-0.00056223	0.0344497	0.987379	0.999438	0.934182	1.06925	3.89231	8	0.866707	0.00711456	0.482537	0.89
29	C-C motif chemokine 23 levels	ebi-a-GCST90027164	Amyotrophic lateral sclerosis || id:ebi-a-GCST90027164	90274767	Weighted median	10	0.00792545	0.0278726	0.776145	1.00796	0.954369	1.06455	3.89231	8	0.866707	0.00711456	0.482537	0.89
30	C-C motif chemokine 23 levels	ebi-a-GCST90027164	Amyotrophic lateral sclerosis || id:ebi-a-GCST90027164	90274767	Inverse variance weighted	10	0.0187618	0.0223188	0.400557	1.01894	0.975326	1.0645	3.89231	8	0.866707	0.00711456	0.482537	0.89
31	C-C motif chemokine 23 levels	ebi-a-GCST90027164	Amyotrophic lateral sclerosis || id:ebi-a-GCST90027164	90274767	Simple mode	10	0.0398038	0.0425969	0.374474	1.04061	0.957254	1.13122	3.89231	8	0.866707	0.00711456	0.482537	0.89
32	C-C motif chemokine 23 levels	ebi-a-GCST90027164	Amyotrophic lateral sclerosis || id:ebi-a-GCST90027164	90274767	Weighted mode	10	0.0118265	0.0251151	0.648922	1.0119	0.963292	1.06295	3.89231	8	0.866707	0.00711456	0.482537	0.89
33	Interleukin-10 levels	ebi-a-GCST90027164	Amyotrophic lateral sclerosis || id:ebi-a-GCST90027164	90274795	MR Egger	6	0.117672	0.208888	0.603293	1.12488	0.746956	1.694	1.65346	4	0.799154	-0.0187348	0.506241	0.802
34	Interleukin-10 levels	ebi-a-GCST90027164	Amyotrophic lateral sclerosis || id:ebi-a-GCST90027164	90274795	Weighted median	6	-0.0137879	0.0726681	0.849514	0.986307	0.855373	1.13728	1.65346	4	0.799154	-0.0187348	0.506241	0.802
35	Interleukin-10 levels	ebi-a-GCST90027164	Amyotrophic lateral sclerosis || id:ebi-a-GCST90027164	90274795	Inverse variance weighted	6	-0.0285081	0.0587855	0.627711	0.971894	0.866124	1.09058	1.65346	4	0.799154	-0.0187348	0.506241	0.802
36	Interleukin-10 levels	ebi-a-GCST90027164	Amyotrophic lateral sclerosis || id:ebi-a-GCST90027164	90274795	Simple mode	6	-0.0293676	0.111755	0.803201	0.971059	0.780042	1.20885	1.65346	4	0.799154	-0.0187348	0.506241	0.802
37	Interleukin-10 levels	ebi-a-GCST90027164	Amyotrophic lateral sclerosis || id:ebi-a-GCST90027164	90274795	Weighted mode	6	0.0201798	0.0892879	0.830143	1.02038	0.856566	1.21553	1.65346	4	0.799154	-0.0187348	0.506241	0.802
38	C-X-C motif chemokine 10 levels	ebi-a-GCST90027164	Amyotrophic lateral sclerosis || id:ebi-a-GCST90027164	90274780	MR Egger	7	0.11044	0.0767534	0.209709	1.11677	0.960793	1.29807	2.18627	5	0.822817	-0.0219104	0.156731	0.547
39	C-X-C motif chemokine 10 levels	ebi-a-GCST90027164	Amyotrophic lateral sclerosis || id:ebi-a-GCST90027164	90274780	Weighted median	7	0.0331405	0.0596433	0.578454	1.0337	0.919652	1.16188	2.18627	5	0.822817	-0.0219104	0.156731	0.547
40	C-X-C motif chemokine 10 levels	ebi-a-GCST90027164	Amyotrophic lateral sclerosis || id:ebi-a-GCST90027164	90274780	Inverse variance weighted	7	0.00651827	0.044686	0.884025	1.00654	0.922133	1.09867	2.18627	5	0.822817	-0.0219104	0.156731	0.547
41	C-X-C motif chemokine 10 levels	ebi-a-GCST90027164	Amyotrophic lateral sclerosis || id:ebi-a-GCST90027164	90274780	Simple mode	7	-0.0320702	0.0892257	0.731586	0.968439	0.813058	1.15351	2.18627	5	0.822817	-0.0219104	0.156731	0.547
42	C-X-C motif chemokine 10 levels	ebi-a-GCST90027164	Amyotrophic lateral sclerosis || id:ebi-a-GCST90027164	90274780	Weighted mode	7	0.0621131	0.0743102	0.435249	1.06408	0.919859	1.23092	2.18627	5	0.822817	-0.0219104	0.156731	0.547
43	Hepatocyte growth factor levels	ebi-a-GCST90027164	Amyotrophic lateral sclerosis || id:ebi-a-GCST90027164	90274793	MR Egger	7	0.0151611	0.178305	0.935538	1.01528	0.715827	1.43999	5.98666	5	0.307519	0.00339007	0.881423	0.403
44	Hepatocyte growth factor levels	ebi-a-GCST90027164	Amyotrophic lateral sclerosis || id:ebi-a-GCST90027164	90274793	Weighted median	7	0.0987041	0.0776206	0.203507	1.10374	0.94797	1.2851	5.98666	5	0.307519	0.00339007	0.881423	0.403
45	Hepatocyte growth factor levels	ebi-a-GCST90027164	Amyotrophic lateral sclerosis || id:ebi-a-GCST90027164	90274793	Inverse variance weighted	7	0.0412994	0.0582965	0.478674	1.04216	0.929636	1.16831	5.98666	5	0.307519	0.00339007	0.881423	0.403
46	Hepatocyte growth factor levels	ebi-a-GCST90027164	Amyotrophic lateral sclerosis || id:ebi-a-GCST90027164	90274793	Simple mode	7	0.143411	0.135707	0.331295	1.1542	0.884641	1.50591	5.98666	5	0.307519	0.00339007	0.881423	0.403
47	Hepatocyte growth factor levels	ebi-a-GCST90027164	Amyotrophic lateral sclerosis || id:ebi-a-GCST90027164	90274793	Weighted mode	7	0.136593	0.142536	0.374914	1.14636	0.866947	1.51583	5.98666	5	0.307519	0.00339007	0.881423	0.403
48	Matrix metalloproteinase-1 levels	ebi-a-GCST90027164	Amyotrophic lateral sclerosis || id:ebi-a-GCST90027164	90274826	MR Egger	16	0.0900449	0.0645716	0.184903	1.09422	0.964143	1.24185	18.7217	14	0.175859	-0.0166103	0.072314	0.059
49	Matrix metalloproteinase-1 levels	ebi-a-GCST90027164	Amyotrophic lateral sclerosis || id:ebi-a-GCST90027164	90274826	Weighted median	16	-0.00240354	0.0483983	0.960392	0.997599	0.907316	1.09687	18.7217	14	0.175859	-0.0166103	0.072314	0.059
50	Matrix metalloproteinase-1 levels	ebi-a-GCST90027164	Amyotrophic lateral sclerosis || id:ebi-a-GCST90027164	90274826	Inverse variance weighted	16	-0.0145175	0.0388802	0.708857	0.985587	0.913271	1.06363	18.7217	14	0.175859	-0.0166103	0.072314	0.059
51	Matrix metalloproteinase-1 levels	ebi-a-GCST90027164	Amyotrophic lateral sclerosis || id:ebi-a-GCST90027164	90274826	Simple mode	16	-0.0808531	0.0978702	0.421679	0.922329	0.761337	1.11736	18.7217	14	0.175859	-0.0166103	0.072314	0.059
52	Matrix metalloproteinase-1 levels	ebi-a-GCST90027164	Amyotrophic lateral sclerosis || id:ebi-a-GCST90027164	90274826	Weighted mode	16	0.0919305	0.0660347	0.184173	1.09629	0.963197	1.24777	18.7217	14	0.175859	-0.0166103	0.072314	0.059
53	Interleukin-5 levels	ebi-a-GCST90027164	Amyotrophic lateral sclerosis || id:ebi-a-GCST90027164	90274814	Wald ratio	1	0.405229	0.16732	0.0154407	1.49965	1.08035	2.08168	#N/A	#N/A	#N/A	#N/A	#N/A	#N/A
54	Delta and Notch-like epidermal growth factor-related receptor levels	ebi-a-GCST90027164	Amyotrophic lateral sclerosis || id:ebi-a-GCST90027164	90274785	MR Egger	6	-0.014968	0.0922279	0.878943	0.985143	0.82223	1.18034	3.83784	4	0.428396	-0.000306352	0.98004	0.569
55	Delta and Notch-like epidermal growth factor-related receptor levels	ebi-a-GCST90027164	Amyotrophic lateral sclerosis || id:ebi-a-GCST90027164	90274785	Weighted median	6	-0.00371015	0.0468987	0.936945	0.996297	0.908799	1.09222	3.83784	4	0.428396	-0.000306352	0.98004	0.569
56	Delta and Notch-like epidermal growth factor-related receptor levels	ebi-a-GCST90027164	Amyotrophic lateral sclerosis || id:ebi-a-GCST90027164	90274785	Inverse variance weighted	6	-0.0171721	0.0406011	0.672333	0.982974	0.907783	1.06439	3.83784	4	0.428396	-0.000306352	0.98004	0.569
57	Delta and Notch-like epidermal growth factor-related receptor levels	ebi-a-GCST90027164	Amyotrophic lateral sclerosis || id:ebi-a-GCST90027164	90274785	Simple mode	6	0.0523384	0.0857372	0.568242	1.05373	0.890737	1.24655	3.83784	4	0.428396	-0.000306352	0.98004	0.569
58	Delta and Notch-like epidermal growth factor-related receptor levels	ebi-a-GCST90027164	Amyotrophic lateral sclerosis || id:ebi-a-GCST90027164	90274785	Weighted mode	6	0.0247572	0.0574419	0.68442	1.02507	0.915917	1.14722	3.83784	4	0.428396	-0.000306352	0.98004	0.569
59	C-C motif chemokine 25 levels	ebi-a-GCST90027164	Amyotrophic lateral sclerosis || id:ebi-a-GCST90027164	90274768	MR Egger	14	-0.0254231	0.0342699	0.472449	0.974897	0.911565	1.04263	14.2061	12	0.287739	0.00105981	0.899498	0.438
60	C-C motif chemokine 25 levels	ebi-a-GCST90027164	Amyotrophic lateral sclerosis || id:ebi-a-GCST90027164	90274768	Weighted median	14	-0.0285655	0.0210286	0.174332	0.971839	0.932598	1.01273	14.2061	12	0.287739	0.00105981	0.899498	0.438
61	C-C motif chemokine 25 levels	ebi-a-GCST90027164	Amyotrophic lateral sclerosis || id:ebi-a-GCST90027164	90274768	Inverse variance weighted	14	-0.0216777	0.0175018	0.215494	0.978556	0.945557	1.01271	14.2061	12	0.287739	0.00105981	0.899498	0.438
62	C-C motif chemokine 25 levels	ebi-a-GCST90027164	Amyotrophic lateral sclerosis || id:ebi-a-GCST90027164	90274768	Simple mode	14	-0.0173967	0.0328266	0.605075	0.982754	0.921514	1.04806	14.2061	12	0.287739	0.00105981	0.899498	0.438
63	C-C motif chemokine 25 levels	ebi-a-GCST90027164	Amyotrophic lateral sclerosis || id:ebi-a-GCST90027164	90274768	Weighted mode	14	-0.0173967	0.0186872	0.368848	0.982754	0.94741	1.01942	14.2061	12	0.287739	0.00105981	0.899498	0.438
64	Sulfotransferase 1A1 levels	ebi-a-GCST90027164	Amyotrophic lateral sclerosis || id:ebi-a-GCST90027164	90274836	MR Egger	5	0.263728	0.179847	0.238806	1.30177	0.915053	1.85193	7.2862	3	0.0633139	-0.0303955	0.335642	0.183
65	Sulfotransferase 1A1 levels	ebi-a-GCST90027164	Amyotrophic lateral sclerosis || id:ebi-a-GCST90027164	90274836	Weighted median	5	0.0923012	0.0517434	0.0744518	1.0967	0.990926	1.21375	7.2862	3	0.0633139	-0.0303955	0.335642	0.183
66	Sulfotransferase 1A1 levels	ebi-a-GCST90027164	Amyotrophic lateral sclerosis || id:ebi-a-GCST90027164	90274836	Inverse variance weighted	5	0.0709471	0.065201	0.276538	1.07352	0.944739	1.21987	7.2862	3	0.0633139	-0.0303955	0.335642	0.183
67	Sulfotransferase 1A1 levels	ebi-a-GCST90027164	Amyotrophic lateral sclerosis || id:ebi-a-GCST90027164	90274836	Simple mode	5	-0.0526118	0.110391	0.658519	0.948748	0.764159	1.17793	7.2862	3	0.0633139	-0.0303955	0.335642	0.183
68	Sulfotransferase 1A1 levels	ebi-a-GCST90027164	Amyotrophic lateral sclerosis || id:ebi-a-GCST90027164	90274836	Weighted mode	5	0.112272	0.0537047	0.104767	1.11882	1.00704	1.24301	7.2862	3	0.0633139	-0.0303955	0.335642	0.183
69	Interleukin-7 levels	ebi-a-GCST90027164	Amyotrophic lateral sclerosis || id:ebi-a-GCST90027164	90274816	Wald ratio	1	-0.130506	0.189233	0.490411	0.877651	0.60568	1.27175	#N/A	#N/A	#N/A	#N/A	#N/A	#N/A
70	Neurotrophin-3 levels	ebi-a-GCST90027164	Amyotrophic lateral sclerosis || id:ebi-a-GCST90027164	90274829	MR Egger	3	-2.01938	1.26099	0.355361	0.132738	0.0112104	1.57171	1.02777	1	0.310682	0.247146	0.348228	#N/A
71	Neurotrophin-3 levels	ebi-a-GCST90027164	Amyotrophic lateral sclerosis || id:ebi-a-GCST90027164	90274829	Weighted median	3	-0.00212135	0.116425	0.985463	0.997881	0.794284	1.25367	1.02777	1	0.310682	0.247146	0.348228	#N/A
72	Neurotrophin-3 levels	ebi-a-GCST90027164	Amyotrophic lateral sclerosis || id:ebi-a-GCST90027164	90274829	Inverse variance weighted	3	0.0452777	0.130549	0.728723	1.04632	0.810099	1.35142	1.02777	1	0.310682	0.247146	0.348228	#N/A
73	Neurotrophin-3 levels	ebi-a-GCST90027164	Amyotrophic lateral sclerosis || id:ebi-a-GCST90027164	90274829	Simple mode	3	-0.054811	0.156876	0.760154	0.946664	0.696082	1.28745	1.02777	1	0.310682	0.247146	0.348228	#N/A
74	Neurotrophin-3 levels	ebi-a-GCST90027164	Amyotrophic lateral sclerosis || id:ebi-a-GCST90027164	90274829	Weighted mode	3	-0.0266139	0.138276	0.865147	0.973737	0.742573	1.27686	1.02777	1	0.310682	0.247146	0.348228	#N/A
75	Programmed cell death 1 ligand 1 levels	ebi-a-GCST90027164	Amyotrophic lateral sclerosis || id:ebi-a-GCST90027164	90274832	MR Egger	4	-0.133453	0.219554	0.605123	0.875069	0.569055	1.34564	1.65753	2	0.436589	0.0194112	0.471562	0.534
76	Programmed cell death 1 ligand 1 levels	ebi-a-GCST90027164	Amyotrophic lateral sclerosis || id:ebi-a-GCST90027164	90274832	Weighted median	4	0.00734011	0.0809078	0.927714	1.00737	0.859642	1.18048	1.65753	2	0.436589	0.0194112	0.471562	0.534
77	Programmed cell death 1 ligand 1 levels	ebi-a-GCST90027164	Amyotrophic lateral sclerosis || id:ebi-a-GCST90027164	90274832	Inverse variance weighted	4	0.0498348	0.069636	0.47421	1.0511	0.916996	1.20481	1.65753	2	0.436589	0.0194112	0.471562	0.534
78	Programmed cell death 1 ligand 1 levels	ebi-a-GCST90027164	Amyotrophic lateral sclerosis || id:ebi-a-GCST90027164	90274832	Simple mode	4	-8.58e-05	0.11942	0.999472	0.999914	0.791244	1.26362	1.65753	2	0.436589	0.0194112	0.471562	0.534
79	Programmed cell death 1 ligand 1 levels	ebi-a-GCST90027164	Amyotrophic lateral sclerosis || id:ebi-a-GCST90027164	90274832	Weighted mode	4	-0.00447805	0.0892869	0.963152	0.995532	0.835704	1.18593	1.65753	2	0.436589	0.0194112	0.471562	0.534
80	Interleukin-15 receptor subunit alpha levels	ebi-a-GCST90027164	Amyotrophic lateral sclerosis || id:ebi-a-GCST90027164	90274800	MR Egger	8	0.0371383	0.0457769	0.448178	1.03784	0.948774	1.13526	5.45023	6	0.487492	-0.00587345	0.592141	0.646
81	Interleukin-15 receptor subunit alpha levels	ebi-a-GCST90027164	Amyotrophic lateral sclerosis || id:ebi-a-GCST90027164	90274800	Weighted median	8	0.022408	0.0245478	0.361331	1.02266	0.974622	1.07307	5.45023	6	0.487492	-0.00587345	0.592141	0.646
82	Interleukin-15 receptor subunit alpha levels	ebi-a-GCST90027164	Amyotrophic lateral sclerosis || id:ebi-a-GCST90027164	90274800	Inverse variance weighted	8	0.0146244	0.0226123	0.517797	1.01473	0.970741	1.06072	5.45023	6	0.487492	-0.00587345	0.592141	0.646
83	Interleukin-15 receptor subunit alpha levels	ebi-a-GCST90027164	Amyotrophic lateral sclerosis || id:ebi-a-GCST90027164	90274800	Simple mode	8	0.0280612	0.0420742	0.526173	1.02846	0.947049	1.11687	5.45023	6	0.487492	-0.00587345	0.592141	0.646
84	Interleukin-15 receptor subunit alpha levels	ebi-a-GCST90027164	Amyotrophic lateral sclerosis || id:ebi-a-GCST90027164	90274800	Weighted mode	8	0.02223	0.0246513	0.397141	1.02248	0.974251	1.07309	5.45023	6	0.487492	-0.00587345	0.592141	0.646
85	Signaling lymphocytic activation molecule levels	ebi-a-GCST90027164	Amyotrophic lateral sclerosis || id:ebi-a-GCST90027164	90274835	MR Egger	11	0.0567628	0.110913	0.621128	1.0584	0.851609	1.31542	9.39993	9	0.401205	-0.001103	0.928434	0.553
86	Signaling lymphocytic activation molecule levels	ebi-a-GCST90027164	Amyotrophic lateral sclerosis || id:ebi-a-GCST90027164	90274835	Weighted median	11	0.0835897	0.0569435	0.14212	1.08718	0.972369	1.21555	9.39993	9	0.401205	-0.001103	0.928434	0.553
87	Signaling lymphocytic activation molecule levels	ebi-a-GCST90027164	Amyotrophic lateral sclerosis || id:ebi-a-GCST90027164	90274835	Inverse variance weighted	11	0.0473021	0.0416264	0.255811	1.04844	0.966295	1.13756	9.39993	9	0.401205	-0.001103	0.928434	0.553
88	Signaling lymphocytic activation molecule levels	ebi-a-GCST90027164	Amyotrophic lateral sclerosis || id:ebi-a-GCST90027164	90274835	Simple mode	11	0.121324	0.0892504	0.203894	1.12899	0.947805	1.34481	9.39993	9	0.401205	-0.001103	0.928434	0.553
89	Signaling lymphocytic activation molecule levels	ebi-a-GCST90027164	Amyotrophic lateral sclerosis || id:ebi-a-GCST90027164	90274835	Weighted mode	11	0.0774457	0.0697061	0.292554	1.08052	0.942539	1.23871	9.39993	9	0.401205	-0.001103	0.928434	0.553
90	Interferon gamma levels	ebi-a-GCST90027164	Amyotrophic lateral sclerosis || id:ebi-a-GCST90027164	90274794	Wald ratio	1	-0.158656	0.181912	0.383122	0.85329	0.597379	1.21883	#N/A	#N/A	#N/A	#N/A	#N/A	#N/A
91	Latency-associated peptide transforming growth factor beta 1 levels	ebi-a-GCST90027164	Amyotrophic lateral sclerosis || id:ebi-a-GCST90027164	90274818	MR Egger	4	0.0806598	0.113377	0.550603	1.084	0.868004	1.35375	4.03345	2	0.133091	-0.0188155	0.465546	0.352
92	Latency-associated peptide transforming growth factor beta 1 levels	ebi-a-GCST90027164	Amyotrophic lateral sclerosis || id:ebi-a-GCST90027164	90274818	Weighted median	4	-0.0237588	0.0691851	0.73129	0.976521	0.852688	1.11834	4.03345	2	0.133091	-0.0188155	0.465546	0.352
93	Latency-associated peptide transforming growth factor beta 1 levels	ebi-a-GCST90027164	Amyotrophic lateral sclerosis || id:ebi-a-GCST90027164	90274818	Inverse variance weighted	4	0.0016594	0.0686517	0.980716	1.00166	0.875554	1.14593	4.03345	2	0.133091	-0.0188155	0.465546	0.352
94	Latency-associated peptide transforming growth factor beta 1 levels	ebi-a-GCST90027164	Amyotrophic lateral sclerosis || id:ebi-a-GCST90027164	90274818	Simple mode	4	0.0959159	0.134747	0.527936	1.10067	0.845195	1.43336	4.03345	2	0.133091	-0.0188155	0.465546	0.352
95	Latency-associated peptide transforming growth factor beta 1 levels	ebi-a-GCST90027164	Amyotrophic lateral sclerosis || id:ebi-a-GCST90027164	90274818	Weighted mode	4	0.0959159	0.0788281	0.310684	1.10067	0.943096	1.28456	4.03345	2	0.133091	-0.0188155	0.465546	0.352
96	T-cell surface glycoprotein CD6 isoform levels	ebi-a-GCST90027164	Amyotrophic lateral sclerosis || id:ebi-a-GCST90027164	90274774	MR Egger	11	-0.0129253	0.0392749	0.74961	0.987158	0.914019	1.06615	11.0681	9	0.271072	0.00309893	0.791713	0.519
97	T-cell surface glycoprotein CD6 isoform levels	ebi-a-GCST90027164	Amyotrophic lateral sclerosis || id:ebi-a-GCST90027164	90274774	Weighted median	11	-0.000853875	0.0220907	0.969167	0.999146	0.956809	1.04336	11.0681	9	0.271072	0.00309893	0.791713	0.519
98	T-cell surface glycoprotein CD6 isoform levels	ebi-a-GCST90027164	Amyotrophic lateral sclerosis || id:ebi-a-GCST90027164	90274774	Inverse variance weighted	11	-0.00416097	0.0214009	0.84584	0.995848	0.95494	1.03851	11.0681	9	0.271072	0.00309893	0.791713	0.519
99	T-cell surface glycoprotein CD6 isoform levels	ebi-a-GCST90027164	Amyotrophic lateral sclerosis || id:ebi-a-GCST90027164	90274774	Simple mode	11	-0.0297482	0.0491278	0.55832	0.97069	0.881581	1.06881	11.0681	9	0.271072	0.00309893	0.791713	0.519
100	T-cell surface glycoprotein CD6 isoform levels	ebi-a-GCST90027164	Amyotrophic lateral sclerosis || id:ebi-a-GCST90027164	90274774	Weighted mode	11	-0.000147211	0.0221708	0.994833	0.999853	0.957335	1.04426	11.0681	9	0.271072	0.00309893	0.791713	0.519
101	Glial cell line-derived neurotrophic factor levels	ebi-a-GCST90027164	Amyotrophic lateral sclerosis || id:ebi-a-GCST90027164	90274792	MR Egger	9	-0.132294	0.0566948	0.052348	0.876083	0.783945	0.97905	6.5179	7	0.480736	0.0151055	0.180966	0.364
102	Glial cell line-derived neurotrophic factor levels	ebi-a-GCST90027164	Amyotrophic lateral sclerosis || id:ebi-a-GCST90027164	90274792	Weighted median	9	-0.107685	0.0445174	0.015566	0.897911	0.822885	0.979777	6.5179	7	0.480736	0.0151055	0.180966	0.364
103	Glial cell line-derived neurotrophic factor levels	ebi-a-GCST90027164	Amyotrophic lateral sclerosis || id:ebi-a-GCST90027164	90274792	Inverse variance weighted	9	-0.064771	0.0353913	0.0672296	0.937282	0.874469	1.00461	6.5179	7	0.480736	0.0151055	0.180966	0.364
104	Glial cell line-derived neurotrophic factor levels	ebi-a-GCST90027164	Amyotrophic lateral sclerosis || id:ebi-a-GCST90027164	90274792	Simple mode	9	-0.102788	0.08903	0.2816	0.902318	0.757837	1.07434	6.5179	7	0.480736	0.0151055	0.180966	0.364
105	Glial cell line-derived neurotrophic factor levels	ebi-a-GCST90027164	Amyotrophic lateral sclerosis || id:ebi-a-GCST90027164	90274792	Weighted mode	9	-0.113958	0.0463205	0.0393066	0.892296	0.814854	0.977097	6.5179	7	0.480736	0.0151055	0.180966	0.364
106	Interleukin-17C levels	ebi-a-GCST90027164	Amyotrophic lateral sclerosis || id:ebi-a-GCST90027164	90274802	MR Egger	3	0.214958	0.187251	0.456215	1.23981	0.858942	1.78956	0.648726	1	0.420569	-0.00900877	0.792796	#N/A
107	Interleukin-17C levels	ebi-a-GCST90027164	Amyotrophic lateral sclerosis || id:ebi-a-GCST90027164	90274802	Weighted median	3	0.158188	0.0971495	0.103463	1.17139	0.968288	1.41708	0.648726	1	0.420569	-0.00900877	0.792796	#N/A
108	Interleukin-17C levels	ebi-a-GCST90027164	Amyotrophic lateral sclerosis || id:ebi-a-GCST90027164	90274802	Inverse variance weighted	3	0.158479	0.0839945	0.0591897	1.17173	0.993869	1.38142	0.648726	1	0.420569	-0.00900877	0.792796	#N/A
109	Interleukin-17C levels	ebi-a-GCST90027164	Amyotrophic lateral sclerosis || id:ebi-a-GCST90027164	90274802	Simple mode	3	0.12046	0.12546	0.438298	1.12802	0.882107	1.44248	0.648726	1	0.420569	-0.00900877	0.792796	#N/A
110	Interleukin-17C levels	ebi-a-GCST90027164	Amyotrophic lateral sclerosis || id:ebi-a-GCST90027164	90274802	Weighted mode	3	0.155679	0.120121	0.324374	1.16845	0.923339	1.47863	0.648726	1	0.420569	-0.00900877	0.792796	#N/A
111	C-X-C motif chemokine 9 levels	ebi-a-GCST90027164	Amyotrophic lateral sclerosis || id:ebi-a-GCST90027164	90274784	MR Egger	5	0.299323	0.191933	0.216773	1.34894	0.926014	1.96504	3.18388	3	0.364134	-0.0384364	0.16758	0.21
112	C-X-C motif chemokine 9 levels	ebi-a-GCST90027164	Amyotrophic lateral sclerosis || id:ebi-a-GCST90027164	90274784	Weighted median	5	0.000277998	0.0720112	0.99692	1.00028	0.868607	1.15191	3.18388	3	0.364134	-0.0384364	0.16758	0.21
113	C-X-C motif chemokine 9 levels	ebi-a-GCST90027164	Amyotrophic lateral sclerosis || id:ebi-a-GCST90027164	90274784	Inverse variance weighted	5	-0.0304954	0.0764917	0.690132	0.969965	0.83492	1.12685	3.18388	3	0.364134	-0.0384364	0.16758	0.21
114	C-X-C motif chemokine 9 levels	ebi-a-GCST90027164	Amyotrophic lateral sclerosis || id:ebi-a-GCST90027164	90274784	Simple mode	5	0.0841527	0.121862	0.527825	1.0878	0.856675	1.38127	3.18388	3	0.364134	-0.0384364	0.16758	0.21
115	C-X-C motif chemokine 9 levels	ebi-a-GCST90027164	Amyotrophic lateral sclerosis || id:ebi-a-GCST90027164	90274784	Weighted mode	5	0.020942	0.0953634	0.836932	1.02116	0.847071	1.23103	3.18388	3	0.364134	-0.0384364	0.16758	0.21
116	Fms-related tyrosine kinase 3 ligand levels	ebi-a-GCST90027164	Amyotrophic lateral sclerosis || id:ebi-a-GCST90027164	90274791	MR Egger	10	-0.13693	0.178913	0.466044	0.872031	0.614098	1.2383	6.44023	8	0.598045	0.00913037	0.573855	0.691
117	Fms-related tyrosine kinase 3 ligand levels	ebi-a-GCST90027164	Amyotrophic lateral sclerosis || id:ebi-a-GCST90027164	90274791	Weighted median	10	-0.0626584	0.0636435	0.324859	0.939264	0.829112	1.06405	6.44023	8	0.598045	0.00913037	0.573855	0.691
118	Fms-related tyrosine kinase 3 ligand levels	ebi-a-GCST90027164	Amyotrophic lateral sclerosis || id:ebi-a-GCST90027164	90274791	Inverse variance weighted	10	-0.0358715	0.0479297	0.454207	0.964764	0.878259	1.05979	6.44023	8	0.598045	0.00913037	0.573855	0.691
119	Fms-related tyrosine kinase 3 ligand levels	ebi-a-GCST90027164	Amyotrophic lateral sclerosis || id:ebi-a-GCST90027164	90274791	Simple mode	10	-0.0725247	0.0995408	0.484776	0.930043	0.765195	1.1304	6.44023	8	0.598045	0.00913037	0.573855	0.691
120	Fms-related tyrosine kinase 3 ligand levels	ebi-a-GCST90027164	Amyotrophic lateral sclerosis || id:ebi-a-GCST90027164	90274791	Weighted mode	10	-0.0669454	0.0892001	0.472113	0.935246	0.785231	1.11392	6.44023	8	0.598045	0.00913037	0.573855	0.691
121	Interleukin-20 levels	ebi-a-GCST90027164	Amyotrophic lateral sclerosis || id:ebi-a-GCST90027164	90274807	Wald ratio	1	-0.0252252	0.157658	0.872881	0.97509	0.715886	1.32815	#N/A	#N/A	#N/A	#N/A	#N/A	#N/A
122	Tumor necrosis factor ligand superfamily member 12 levels	ebi-a-GCST90027164	Amyotrophic lateral sclerosis || id:ebi-a-GCST90027164	90274846	MR Egger	12	0.264747	0.0919751	0.0164288	1.3031	1.08815	1.56052	12.6703	10	0.242693	-0.0323002	0.0235472	0.023
123	Tumor necrosis factor ligand superfamily member 12 levels	ebi-a-GCST90027164	Amyotrophic lateral sclerosis || id:ebi-a-GCST90027164	90274846	Weighted median	12	0.0608024	0.0581642	0.295858	1.06269	0.948191	1.19101	12.6703	10	0.242693	-0.0323002	0.0235472	0.023
124	Tumor necrosis factor ligand superfamily member 12 levels	ebi-a-GCST90027164	Amyotrophic lateral sclerosis || id:ebi-a-GCST90027164	90274846	Inverse variance weighted	12	0.0435941	0.049777	0.381145	1.04456	0.947462	1.15161	12.6703	10	0.242693	-0.0323002	0.0235472	0.023
125	Tumor necrosis factor ligand superfamily member 12 levels	ebi-a-GCST90027164	Amyotrophic lateral sclerosis || id:ebi-a-GCST90027164	90274846	Simple mode	12	0.0266375	0.129502	0.840788	1.027	0.796772	1.32374	12.6703	10	0.242693	-0.0323002	0.0235472	0.023
126	Tumor necrosis factor ligand superfamily member 12 levels	ebi-a-GCST90027164	Amyotrophic lateral sclerosis || id:ebi-a-GCST90027164	90274846	Weighted mode	12	0.179785	0.0642293	0.0173023	1.19696	1.05537	1.35754	12.6703	10	0.242693	-0.0323002	0.0235472	0.023
127	Urokinase-type plasminogen activator levels	ebi-a-GCST90027164	Amyotrophic lateral sclerosis || id:ebi-a-GCST90027164	90274847	MR Egger	14	0.122115	0.107935	0.280002	1.12988	0.914445	1.39608	22.2929	12	0.0343648	-0.0117437	0.364004	0.035
128	Urokinase-type plasminogen activator levels	ebi-a-GCST90027164	Amyotrophic lateral sclerosis || id:ebi-a-GCST90027164	90274847	Weighted median	14	-0.0049566	0.0570223	0.930732	0.995056	0.889834	1.11272	22.2929	12	0.0343648	-0.0117437	0.364004	0.035
129	Urokinase-type plasminogen activator levels	ebi-a-GCST90027164	Amyotrophic lateral sclerosis || id:ebi-a-GCST90027164	90274847	Inverse variance weighted	14	0.0302765	0.0464563	0.514582	1.03074	0.941032	1.129	22.2929	12	0.0343648	-0.0117437	0.364004	0.035
130	Urokinase-type plasminogen activator levels	ebi-a-GCST90027164	Amyotrophic lateral sclerosis || id:ebi-a-GCST90027164	90274847	Simple mode	14	0.00260296	0.128218	0.984112	1.00261	0.77981	1.28906	22.2929	12	0.0343648	-0.0117437	0.364004	0.035
131	Urokinase-type plasminogen activator levels	ebi-a-GCST90027164	Amyotrophic lateral sclerosis || id:ebi-a-GCST90027164	90274847	Weighted mode	14	0.177072	0.143511	0.239096	1.19372	0.901037	1.58147	22.2929	12	0.0343648	-0.0117437	0.364004	0.035
132	Interleukin-8 levels	ebi-a-GCST90027164	Amyotrophic lateral sclerosis || id:ebi-a-GCST90027164	90274817	MR Egger	6	0.0118809	0.162588	0.945255	1.01195	0.735804	1.39174	6.44759	4	0.168123	0.00400861	0.819061	0.261
133	Interleukin-8 levels	ebi-a-GCST90027164	Amyotrophic lateral sclerosis || id:ebi-a-GCST90027164	90274817	Weighted median	6	0.159766	0.0944002	0.0905629	1.17324	0.975058	1.41169	6.44759	4	0.168123	0.00400861	0.819061	0.261
134	Interleukin-8 levels	ebi-a-GCST90027164	Amyotrophic lateral sclerosis || id:ebi-a-GCST90027164	90274817	Inverse variance weighted	6	0.0456359	0.0771697	0.554272	1.04669	0.899769	1.21761	6.44759	4	0.168123	0.00400861	0.819061	0.261
135	Interleukin-8 levels	ebi-a-GCST90027164	Amyotrophic lateral sclerosis || id:ebi-a-GCST90027164	90274817	Simple mode	6	0.194084	0.158626	0.27564	1.2142	0.889742	1.65697	6.44759	4	0.168123	0.00400861	0.819061	0.261
136	Interleukin-8 levels	ebi-a-GCST90027164	Amyotrophic lateral sclerosis || id:ebi-a-GCST90027164	90274817	Weighted mode	6	0.192573	0.178058	0.328848	1.21236	0.855199	1.7187	6.44759	4	0.168123	0.00400861	0.819061	0.261
137	Monocyte chemoattractant protein-4 levels	ebi-a-GCST90027164	Amyotrophic lateral sclerosis || id:ebi-a-GCST90027164	90274824	MR Egger	10	0.0372749	0.0816655	0.660215	1.03798	0.88445	1.21816	6.48684	8	0.592868	-0.00647689	0.67544	0.693
138	Monocyte chemoattractant protein-4 levels	ebi-a-GCST90027164	Amyotrophic lateral sclerosis || id:ebi-a-GCST90027164	90274824	Weighted median	10	0.0179821	0.0372152	0.628958	1.01814	0.946523	1.09519	6.48684	8	0.592868	-0.00647689	0.67544	0.693
139	Monocyte chemoattractant protein-4 levels	ebi-a-GCST90027164	Amyotrophic lateral sclerosis || id:ebi-a-GCST90027164	90274824	Inverse variance weighted	10	0.0041336	0.0291579	0.887265	1.00414	0.948365	1.0632	6.48684	8	0.592868	-0.00647689	0.67544	0.693
140	Monocyte chemoattractant protein-4 levels	ebi-a-GCST90027164	Amyotrophic lateral sclerosis || id:ebi-a-GCST90027164	90274824	Simple mode	10	0.0272393	0.0522358	0.614628	1.02761	0.927611	1.1384	6.48684	8	0.592868	-0.00647689	0.67544	0.693
141	Monocyte chemoattractant protein-4 levels	ebi-a-GCST90027164	Amyotrophic lateral sclerosis || id:ebi-a-GCST90027164	90274824	Weighted mode	10	0.0285345	0.0437899	0.53093	1.02895	0.944317	1.12116	6.48684	8	0.592868	-0.00647689	0.67544	0.693
142	Interleukin-20 receptor subunit alpha levels	ebi-a-GCST90027164	Amyotrophic lateral sclerosis || id:ebi-a-GCST90027164	90274808	Wald ratio	1	0.1076	0.146883	0.463828	1.1136	0.835028	1.48511	#N/A	#N/A	#N/A	#N/A	#N/A	#N/A
143	TNF-beta levels	ebi-a-GCST90027164	Amyotrophic lateral sclerosis || id:ebi-a-GCST90027164	90274840	MR Egger	10	-0.0364129	0.0510651	0.496074	0.964242	0.872406	1.06575	17.9375	8	0.0216996	-0.0075008	0.639	0.097
144	TNF-beta levels	ebi-a-GCST90027164	Amyotrophic lateral sclerosis || id:ebi-a-GCST90027164	90274840	Weighted median	10	-0.0393916	0.0245589	0.108722	0.961374	0.916194	1.00878	17.9375	8	0.0216996	-0.0075008	0.639	0.097
145	TNF-beta levels	ebi-a-GCST90027164	Amyotrophic lateral sclerosis || id:ebi-a-GCST90027164	90274840	Inverse variance weighted	10	-0.0564699	0.0289355	0.0509881	0.945095	0.892987	1.00024	17.9375	8	0.0216996	-0.0075008	0.639	0.097
146	TNF-beta levels	ebi-a-GCST90027164	Amyotrophic lateral sclerosis || id:ebi-a-GCST90027164	90274840	Simple mode	10	-0.0312111	0.0384201	0.437541	0.969271	0.898962	1.04508	17.9375	8	0.0216996	-0.0075008	0.639	0.097
147	TNF-beta levels	ebi-a-GCST90027164	Amyotrophic lateral sclerosis || id:ebi-a-GCST90027164	90274840	Weighted mode	10	-0.0344097	0.0226769	0.163479	0.966176	0.924173	1.01009	17.9375	8	0.0216996	-0.0075008	0.639	0.097
148	STAM binding protein levels	ebi-a-GCST90027164	Amyotrophic lateral sclerosis || id:ebi-a-GCST90027164	90274837	Inverse variance weighted	2	-0.0982884	0.243635	0.686635	0.906387	0.562248	1.46117	#N/A	#N/A	#N/A	NA	NA	#N/A
149	Caspase 8 levels	ebi-a-GCST90027164	Amyotrophic lateral sclerosis || id:ebi-a-GCST90027164	90274763	Inverse variance weighted	2	0.0357856	0.0748152	0.632423	1.03643	0.895071	1.20012	#N/A	#N/A	#N/A	NA	NA	#N/A
150	SIR2-like protein 2 levels	ebi-a-GCST90027164	Amyotrophic lateral sclerosis || id:ebi-a-GCST90027164	90274834	Inverse variance weighted	2	0.215194	0.0952021	0.0237973	1.2401	1.02901	1.4945	#N/A	#N/A	#N/A	NA	NA	#N/A
151	Interleukin-17A levels	ebi-a-GCST90027164	Amyotrophic lateral sclerosis || id:ebi-a-GCST90027164	90274801	Wald ratio	1	0.119821	0.157895	0.447933	1.12729	0.827246	1.53617	#N/A	#N/A	#N/A	#N/A	#N/A	#N/A
152	Stem cell factor levels	ebi-a-GCST90027164	Amyotrophic lateral sclerosis || id:ebi-a-GCST90027164	90274833	MR Egger	16	-0.0389999	0.0630122	0.545905	0.961751	0.850013	1.08818	12.0759	14	0.600206	0.00263023	0.757915	0.693
153	Stem cell factor levels	ebi-a-GCST90027164	Amyotrophic lateral sclerosis || id:ebi-a-GCST90027164	90274833	Weighted median	16	-0.0219046	0.0412614	0.595505	0.978334	0.902328	1.06074	12.0759	14	0.600206	0.00263023	0.757915	0.693
154	Stem cell factor levels	ebi-a-GCST90027164	Amyotrophic lateral sclerosis || id:ebi-a-GCST90027164	90274833	Inverse variance weighted	16	-0.0214717	0.0293377	0.464241	0.978757	0.924064	1.03669	12.0759	14	0.600206	0.00263023	0.757915	0.693
155	Stem cell factor levels	ebi-a-GCST90027164	Amyotrophic lateral sclerosis || id:ebi-a-GCST90027164	90274833	Simple mode	16	-0.0131382	0.0722601	0.858159	0.986948	0.856614	1.13711	12.0759	14	0.600206	0.00263023	0.757915	0.693
156	Stem cell factor levels	ebi-a-GCST90027164	Amyotrophic lateral sclerosis || id:ebi-a-GCST90027164	90274833	Weighted mode	16	-0.027671	0.0457454	0.554292	0.972708	0.88929	1.06395	12.0759	14	0.600206	0.00263023	0.757915	0.693
157	Eotaxin levels	ebi-a-GCST90027164	Amyotrophic lateral sclerosis || id:ebi-a-GCST90027164	90274764	MR Egger	9	0.0284791	0.116789	0.814339	1.02889	0.818381	1.29354	14.188	7	0.0479372	0.0028914	0.849273	0.095
158	Eotaxin levels	ebi-a-GCST90027164	Amyotrophic lateral sclerosis || id:ebi-a-GCST90027164	90274764	Weighted median	9	0.0277738	0.0543509	0.609344	1.02816	0.924267	1.14374	14.188	7	0.0479372	0.0028914	0.849273	0.095
159	Eotaxin levels	ebi-a-GCST90027164	Amyotrophic lateral sclerosis || id:ebi-a-GCST90027164	90274764	Inverse variance weighted	9	0.0486935	0.0524958	0.353631	1.0499	0.947244	1.16368	14.188	7	0.0479372	0.0028914	0.849273	0.095
160	Eotaxin levels	ebi-a-GCST90027164	Amyotrophic lateral sclerosis || id:ebi-a-GCST90027164	90274764	Simple mode	9	0.0357339	0.0935638	0.712465	1.03638	0.862732	1.24498	14.188	7	0.0479372	0.0028914	0.849273	0.095
161	Eotaxin levels	ebi-a-GCST90027164	Amyotrophic lateral sclerosis || id:ebi-a-GCST90027164	90274764	Weighted mode	9	0.0289134	0.0656133	0.671121	1.02934	0.905119	1.1706	14.188	7	0.0479372	0.0028914	0.849273	0.095
162	C-C motif chemokine 19 levels	ebi-a-GCST90027164	Amyotrophic lateral sclerosis || id:ebi-a-GCST90027164	90274765	MR Egger	6	0.0466199	0.0966341	0.654708	1.04772	0.866942	1.2662	7.31448	4	0.120173	-0.00834282	0.654291	0.227
163	C-C motif chemokine 19 levels	ebi-a-GCST90027164	Amyotrophic lateral sclerosis || id:ebi-a-GCST90027164	90274765	Weighted median	6	-0.00773788	0.060063	0.897493	0.992292	0.88209	1.11626	7.31448	4	0.120173	-0.00834282	0.654291	0.227
164	C-C motif chemokine 19 levels	ebi-a-GCST90027164	Amyotrophic lateral sclerosis || id:ebi-a-GCST90027164	90274765	Inverse variance weighted	6	0.00862924	0.0516712	0.867368	1.00867	0.911516	1.11617	7.31448	4	0.120173	-0.00834282	0.654291	0.227
165	C-C motif chemokine 19 levels	ebi-a-GCST90027164	Amyotrophic lateral sclerosis || id:ebi-a-GCST90027164	90274765	Simple mode	6	-0.111773	0.104757	0.33477	0.894248	0.728261	1.09807	7.31448	4	0.120173	-0.00834282	0.654291	0.227
166	C-C motif chemokine 19 levels	ebi-a-GCST90027164	Amyotrophic lateral sclerosis || id:ebi-a-GCST90027164	90274765	Weighted mode	6	-0.0728653	0.0771479	0.388288	0.929726	0.799255	1.0815	7.31448	4	0.120173	-0.00834282	0.654291	0.227
167	Interleukin-22 receptor subunit alpha-1 levels	ebi-a-GCST90027164	Amyotrophic lateral sclerosis || id:ebi-a-GCST90027164	90274809	Wald ratio	1	-0.0627973	0.239296	0.792993	0.939134	0.587536	1.50114	#N/A	#N/A	#N/A	#N/A	#N/A	#N/A
168	Interleukin-10 receptor subunit beta levels	ebi-a-GCST90027164	Amyotrophic lateral sclerosis || id:ebi-a-GCST90027164	90274797	MR Egger	9	0.0593053	0.0633587	0.38042	1.0611	0.937182	1.2014	13.6345	7	0.0580772	-0.0227348	0.199034	0.231
169	Interleukin-10 receptor subunit beta levels	ebi-a-GCST90027164	Amyotrophic lateral sclerosis || id:ebi-a-GCST90027164	90274797	Weighted median	9	-0.00300755	0.0273314	0.912378	0.996997	0.944994	1.05186	13.6345	7	0.0580772	-0.0227348	0.199034	0.231
170	Interleukin-10 receptor subunit beta levels	ebi-a-GCST90027164	Amyotrophic lateral sclerosis || id:ebi-a-GCST90027164	90274797	Inverse variance weighted	9	-0.0162932	0.0363573	0.654052	0.983839	0.91617	1.05651	13.6345	7	0.0580772	-0.0227348	0.199034	0.231
171	Interleukin-10 receptor subunit beta levels	ebi-a-GCST90027164	Amyotrophic lateral sclerosis || id:ebi-a-GCST90027164	90274797	Simple mode	9	-0.0729941	0.0831263	0.405483	0.929606	0.789843	1.0941	13.6345	7	0.0580772	-0.0227348	0.199034	0.231
172	Interleukin-10 receptor subunit beta levels	ebi-a-GCST90027164	Amyotrophic lateral sclerosis || id:ebi-a-GCST90027164	90274797	Weighted mode	9	-0.00675315	0.0275675	0.812648	0.99327	0.941025	1.04841	13.6345	7	0.0580772	-0.0227348	0.199034	0.231
173	Protein S100-A12 levels	ebi-a-GCST90027164	Amyotrophic lateral sclerosis || id:ebi-a-GCST90027164	90274786	MR Egger	3	0.175838	0.140398	0.428951	1.19225	0.905433	1.56991	0.438235	1	0.507976	-0.0133203	0.598256	#N/A
174	Protein S100-A12 levels	ebi-a-GCST90027164	Amyotrophic lateral sclerosis || id:ebi-a-GCST90027164	90274786	Weighted median	3	0.0881398	0.0617304	0.153344	1.09214	0.967682	1.23261	0.438235	1	0.507976	-0.0133203	0.598256	#N/A
175	Protein S100-A12 levels	ebi-a-GCST90027164	Amyotrophic lateral sclerosis || id:ebi-a-GCST90027164	90274786	Inverse variance weighted	3	0.0824054	0.0579915	0.15532	1.0859	0.969225	1.21661	0.438235	1	0.507976	-0.0133203	0.598256	#N/A
176	Protein S100-A12 levels	ebi-a-GCST90027164	Amyotrophic lateral sclerosis || id:ebi-a-GCST90027164	90274786	Simple mode	3	0.0944471	0.0813417	0.365444	1.09905	0.937084	1.28901	0.438235	1	0.507976	-0.0133203	0.598256	#N/A
177	Protein S100-A12 levels	ebi-a-GCST90027164	Amyotrophic lateral sclerosis || id:ebi-a-GCST90027164	90274786	Weighted mode	3	0.089351	0.0711565	0.336044	1.09346	0.951119	1.25711	0.438235	1	0.507976	-0.0133203	0.598256	#N/A
178	interleukin-18 receptor 1 levels	ebi-a-GCST90027164	Amyotrophic lateral sclerosis || id:ebi-a-GCST90027164	90274804	MR Egger	19	-0.0601758	0.0347985	0.101876	0.941599	0.879518	1.00806	23.2634	17	0.140871	0.0216176	0.0875686	0.08
179	interleukin-18 receptor 1 levels	ebi-a-GCST90027164	Amyotrophic lateral sclerosis || id:ebi-a-GCST90027164	90274804	Weighted median	19	0.00699525	0.0215137	0.745065	1.00702	0.96544	1.05039	23.2634	17	0.140871	0.0216176	0.0875686	0.08
180	interleukin-18 receptor 1 levels	ebi-a-GCST90027164	Amyotrophic lateral sclerosis || id:ebi-a-GCST90027164	90274804	Inverse variance weighted	19	-0.00558412	0.0185094	0.762888	0.994431	0.959002	1.03117	23.2634	17	0.140871	0.0216176	0.0875686	0.08
181	interleukin-18 receptor 1 levels	ebi-a-GCST90027164	Amyotrophic lateral sclerosis || id:ebi-a-GCST90027164	90274804	Simple mode	19	0.0161466	0.0381819	0.677387	1.01628	0.942999	1.09525	23.2634	17	0.140871	0.0216176	0.0875686	0.08
182	interleukin-18 receptor 1 levels	ebi-a-GCST90027164	Amyotrophic lateral sclerosis || id:ebi-a-GCST90027164	90274804	Weighted mode	19	0.0011652	0.0183948	0.950191	1.00117	0.965713	1.03792	23.2634	17	0.140871	0.0216176	0.0875686	0.08
183	Axin-1 levels	ebi-a-GCST90027164	Amyotrophic lateral sclerosis || id:ebi-a-GCST90027164	90274761	MR Egger	3	-0.0305093	0.214394	0.91001	0.969951	0.637169	1.47654	0.00252356	1	0.959935	-0.00228306	0.934395	#N/A
184	Axin-1 levels	ebi-a-GCST90027164	Amyotrophic lateral sclerosis || id:ebi-a-GCST90027164	90274761	Weighted median	3	-0.0450356	0.108161	0.677135	0.955963	0.773344	1.18171	0.00252356	1	0.959935	-0.00228306	0.934395	#N/A
185	Axin-1 levels	ebi-a-GCST90027164	Amyotrophic lateral sclerosis || id:ebi-a-GCST90027164	90274761	Inverse variance weighted	3	-0.0506309	0.0900494	0.573941	0.950629	0.796819	1.13413	0.00252356	1	0.959935	-0.00228306	0.934395	#N/A
186	Axin-1 levels	ebi-a-GCST90027164	Amyotrophic lateral sclerosis || id:ebi-a-GCST90027164	90274761	Simple mode	3	-0.044201	0.119516	0.746997	0.956762	0.756954	1.20931	0.00252356	1	0.959935	-0.00228306	0.934395	#N/A
187	Axin-1 levels	ebi-a-GCST90027164	Amyotrophic lateral sclerosis || id:ebi-a-GCST90027164	90274761	Weighted mode	3	-0.044201	0.115336	0.738443	0.956762	0.763182	1.19944	0.00252356	1	0.959935	-0.00228306	0.934395	#N/A
188	Monocyte chemoattractant protein-3 levels	ebi-a-GCST90027164	Amyotrophic lateral sclerosis || id:ebi-a-GCST90027164	90274823	MR Egger	10	0.00625044	0.118888	0.95936	1.00627	0.797105	1.27032	12.5699	8	0.127529	-0.00287898	0.825759	0.241
189	Monocyte chemoattractant protein-3 levels	ebi-a-GCST90027164	Amyotrophic lateral sclerosis || id:ebi-a-GCST90027164	90274823	Weighted median	10	-0.00186753	0.0526817	0.971721	0.998134	0.900213	1.10671	12.5699	8	0.127529	-0.00287898	0.825759	0.241
190	Monocyte chemoattractant protein-3 levels	ebi-a-GCST90027164	Amyotrophic lateral sclerosis || id:ebi-a-GCST90027164	90274823	Inverse variance weighted	10	-0.0183962	0.0462889	0.691057	0.981772	0.896621	1.07501	12.5699	8	0.127529	-0.00287898	0.825759	0.241
191	Monocyte chemoattractant protein-3 levels	ebi-a-GCST90027164	Amyotrophic lateral sclerosis || id:ebi-a-GCST90027164	90274823	Simple mode	10	-0.00467063	0.0760985	0.952401	0.99534	0.857423	1.15544	12.5699	8	0.127529	-0.00287898	0.825759	0.241
192	Monocyte chemoattractant protein-3 levels	ebi-a-GCST90027164	Amyotrophic lateral sclerosis || id:ebi-a-GCST90027164	90274823	Weighted mode	10	-0.000529135	0.0646661	0.99365	0.999471	0.880492	1.13453	12.5699	8	0.127529	-0.00287898	0.825759	0.241
193	Thymic stromal lymphopoietin levels	ebi-a-GCST90027164	Amyotrophic lateral sclerosis || id:ebi-a-GCST90027164	90274845	Wald ratio	1	-0.06974	0.152482	0.647409	0.932636	0.691698	1.2575	#N/A	#N/A	#N/A	#N/A	#N/A	#N/A
194	C-X-C motif chemokine 6 levels	ebi-a-GCST90027164	Amyotrophic lateral sclerosis || id:ebi-a-GCST90027164	90274783	MR Egger	6	-0.0110832	0.0534582	0.845884	0.988978	0.890599	1.09822	6.96312	4	0.13785	0.00515568	0.673289	0.366
195	C-X-C motif chemokine 6 levels	ebi-a-GCST90027164	Amyotrophic lateral sclerosis || id:ebi-a-GCST90027164	90274783	Weighted median	6	0.0187773	0.0273072	0.491686	1.01895	0.965852	1.07498	6.96312	4	0.13785	0.00515568	0.673289	0.366
196	C-X-C motif chemokine 6 levels	ebi-a-GCST90027164	Amyotrophic lateral sclerosis || id:ebi-a-GCST90027164	90274783	Inverse variance weighted	6	0.00764007	0.0312107	0.806619	1.00767	0.947875	1.07124	6.96312	4	0.13785	0.00515568	0.673289	0.366
197	C-X-C motif chemokine 6 levels	ebi-a-GCST90027164	Amyotrophic lateral sclerosis || id:ebi-a-GCST90027164	90274783	Simple mode	6	0.0686379	0.0598576	0.303406	1.07105	0.952483	1.20437	6.96312	4	0.13785	0.00515568	0.673289	0.366
198	C-X-C motif chemokine 6 levels	ebi-a-GCST90027164	Amyotrophic lateral sclerosis || id:ebi-a-GCST90027164	90274783	Weighted mode	6	0.0215388	0.0281402	0.47858	1.02177	0.966943	1.07971	6.96312	4	0.13785	0.00515568	0.673289	0.366
199	Vascular endothelial growth factor A levels	ebi-a-GCST90027164	Amyotrophic lateral sclerosis || id:ebi-a-GCST90027164	90274848	MR Egger	10	0.0154015	0.0444282	0.737787	1.01552	0.930831	1.10792	5.6076	8	0.691092	-0.0034574	0.644709	0.739
200	Vascular endothelial growth factor A levels	ebi-a-GCST90027164	Amyotrophic lateral sclerosis || id:ebi-a-GCST90027164	90274848	Weighted median	10	0.00679857	0.0294476	0.817416	1.00682	0.950356	1.06664	5.6076	8	0.691092	-0.0034574	0.644709	0.739
201	Vascular endothelial growth factor A levels	ebi-a-GCST90027164	Amyotrophic lateral sclerosis || id:ebi-a-GCST90027164	90274848	Inverse variance weighted	10	-0.00165638	0.0265718	0.950295	0.998345	0.947681	1.05172	5.6076	8	0.691092	-0.0034574	0.644709	0.739
202	Vascular endothelial growth factor A levels	ebi-a-GCST90027164	Amyotrophic lateral sclerosis || id:ebi-a-GCST90027164	90274848	Simple mode	10	0.00342951	0.0710436	0.962553	1.00344	0.873003	1.15335	5.6076	8	0.691092	-0.0034574	0.644709	0.739
203	Vascular endothelial growth factor A levels	ebi-a-GCST90027164	Amyotrophic lateral sclerosis || id:ebi-a-GCST90027164	90274848	Weighted mode	10	0.00975921	0.0302137	0.754069	1.00981	0.951744	1.07141	5.6076	8	0.691092	-0.0034574	0.644709	0.739
204	CUB domain-containing protein 1 levels	ebi-a-GCST90027164	Amyotrophic lateral sclerosis || id:ebi-a-GCST90027164	90274775	MR Egger	6	-0.00132445	0.0641365	0.984513	0.998676	0.880705	1.13245	0.897584	4	0.924907	-0.00849828	0.444727	0.781
205	CUB domain-containing protein 1 levels	ebi-a-GCST90027164	Amyotrophic lateral sclerosis || id:ebi-a-GCST90027164	90274775	Weighted median	6	-0.0128076	0.0405039	0.751846	0.987274	0.911927	1.06885	0.897584	4	0.924907	-0.00849828	0.444727	0.781
206	CUB domain-containing protein 1 levels	ebi-a-GCST90027164	Amyotrophic lateral sclerosis || id:ebi-a-GCST90027164	90274775	Inverse variance weighted	6	-0.0465088	0.0355984	0.191388	0.954556	0.890224	1.02354	0.897584	4	0.924907	-0.00849828	0.444727	0.781
207	CUB domain-containing protein 1 levels	ebi-a-GCST90027164	Amyotrophic lateral sclerosis || id:ebi-a-GCST90027164	90274775	Simple mode	6	-0.0737783	0.0640702	0.301588	0.928878	0.819258	1.05316	0.897584	4	0.924907	-0.00849828	0.444727	0.781
208	CUB domain-containing protein 1 levels	ebi-a-GCST90027164	Amyotrophic lateral sclerosis || id:ebi-a-GCST90027164	90274775	Weighted mode	6	-0.0177466	0.0454579	0.712321	0.98241	0.898666	1.07396	0.897584	4	0.924907	-0.00849828	0.444727	0.781
209	Macrophage colony-stimulating factor 1 levels	ebi-a-GCST90027164	Amyotrophic lateral sclerosis || id:ebi-a-GCST90027164	90274776	Wald ratio	1	-0.0498812	0.0665083	0.453255	0.951342	0.835072	1.0838	#N/A	#N/A	#N/A	#N/A	#N/A	#N/A
210	Macrophage inflammatory protein 1a levels	ebi-a-GCST90027164	Amyotrophic lateral sclerosis || id:ebi-a-GCST90027164	90274825	MR Egger	8	0.0298781	0.0472923	0.550831	1.03033	0.939117	1.1304	5.20269	6	0.518091	-0.0112037	0.229986	0.495
211	Macrophage inflammatory protein 1a levels	ebi-a-GCST90027164	Amyotrophic lateral sclerosis || id:ebi-a-GCST90027164	90274825	Weighted median	8	-0.00292828	0.0342311	0.931829	0.997076	0.932374	1.06627	5.20269	6	0.518091	-0.0112037	0.229986	0.495
212	Macrophage inflammatory protein 1a levels	ebi-a-GCST90027164	Amyotrophic lateral sclerosis || id:ebi-a-GCST90027164	90274825	Inverse variance weighted	8	-0.0175255	0.031267	0.575131	0.982627	0.924217	1.04473	5.20269	6	0.518091	-0.0112037	0.229986	0.495
213	Macrophage inflammatory protein 1a levels	ebi-a-GCST90027164	Amyotrophic lateral sclerosis || id:ebi-a-GCST90027164	90274825	Simple mode	8	0.0435402	0.0919679	0.650316	1.0445	0.872217	1.25082	5.20269	6	0.518091	-0.0112037	0.229986	0.495
214	Macrophage inflammatory protein 1a levels	ebi-a-GCST90027164	Amyotrophic lateral sclerosis || id:ebi-a-GCST90027164	90274825	Weighted mode	8	0.00140195	0.0346239	0.968833	1.0014	0.935699	1.07172	5.20269	6	0.518091	-0.0112037	0.229986	0.495
215	Interleukin-12 subunit beta levels	ebi-a-GCST90027164	Amyotrophic lateral sclerosis || id:ebi-a-GCST90027164	90274798	MR Egger	20	-0.0118219	0.0603304	0.846843	0.988248	0.878034	1.1123	19.8791	18	0.339668	0.00426483	0.560716	0.392
216	Interleukin-12 subunit beta levels	ebi-a-GCST90027164	Amyotrophic lateral sclerosis || id:ebi-a-GCST90027164	90274798	Weighted median	20	0.00988529	0.038694	0.798358	1.00993	0.936173	1.08951	19.8791	18	0.339668	0.00426483	0.560716	0.392
217	Interleukin-12 subunit beta levels	ebi-a-GCST90027164	Amyotrophic lateral sclerosis || id:ebi-a-GCST90027164	90274798	Inverse variance weighted	20	0.0198396	0.0275658	0.471699	1.02004	0.966388	1.07667	19.8791	18	0.339668	0.00426483	0.560716	0.392
218	Interleukin-12 subunit beta levels	ebi-a-GCST90027164	Amyotrophic lateral sclerosis || id:ebi-a-GCST90027164	90274798	Simple mode	20	-0.00273865	0.0742802	0.970974	0.997265	0.862148	1.15356	19.8791	18	0.339668	0.00426483	0.560716	0.392
219	Interleukin-12 subunit beta levels	ebi-a-GCST90027164	Amyotrophic lateral sclerosis || id:ebi-a-GCST90027164	90274798	Weighted mode	20	0.00372278	0.0442617	0.93385	1.00373	0.920323	1.09469	19.8791	18	0.339668	0.00426483	0.560716	0.392
220	Cystatin D levels	ebi-a-GCST90027164	Amyotrophic lateral sclerosis || id:ebi-a-GCST90027164	90274777	MR Egger	16	-0.0265004	0.0434336	0.551548	0.973848	0.894375	1.06038	17.1813	14	0.246645	0.00245501	0.75877	0.34
221	Cystatin D levels	ebi-a-GCST90027164	Amyotrophic lateral sclerosis || id:ebi-a-GCST90027164	90274777	Weighted median	16	0.00553139	0.0290578	0.849029	1.00555	0.949878	1.06448	17.1813	14	0.246645	0.00245501	0.75877	0.34
222	Cystatin D levels	ebi-a-GCST90027164	Amyotrophic lateral sclerosis || id:ebi-a-GCST90027164	90274777	Inverse variance weighted	16	-0.015394	0.0243092	0.526564	0.984724	0.938906	1.03278	17.1813	14	0.246645	0.00245501	0.75877	0.34
223	Cystatin D levels	ebi-a-GCST90027164	Amyotrophic lateral sclerosis || id:ebi-a-GCST90027164	90274777	Simple mode	16	0.0218957	0.0520258	0.679824	1.02214	0.923047	1.13186	17.1813	14	0.246645	0.00245501	0.75877	0.34
224	Cystatin D levels	ebi-a-GCST90027164	Amyotrophic lateral sclerosis || id:ebi-a-GCST90027164	90274777	Weighted mode	16	0.0112496	0.0322343	0.731944	1.01131	0.949396	1.07727	17.1813	14	0.246645	0.00245501	0.75877	0.34
225	TNF-related apoptosis-inducing ligand levels	ebi-a-GCST90027164	Amyotrophic lateral sclerosis || id:ebi-a-GCST90027164	90274843	MR Egger	10	-0.0116281	0.0524361	0.830058	0.988439	0.891899	1.09543	12.441	8	0.132587	0.00669526	0.499753	0.133
226	TNF-related apoptosis-inducing ligand levels	ebi-a-GCST90027164	Amyotrophic lateral sclerosis || id:ebi-a-GCST90027164	90274843	Weighted median	10	0.0250759	0.0393446	0.523902	1.02539	0.949291	1.1076	12.441	8	0.132587	0.00669526	0.499753	0.133
227	TNF-related apoptosis-inducing ligand levels	ebi-a-GCST90027164	Amyotrophic lateral sclerosis || id:ebi-a-GCST90027164	90274843	Inverse variance weighted	10	0.0164092	0.0333263	0.622451	1.01654	0.952267	1.08516	12.441	8	0.132587	0.00669526	0.499753	0.133
228	TNF-related apoptosis-inducing ligand levels	ebi-a-GCST90027164	Amyotrophic lateral sclerosis || id:ebi-a-GCST90027164	90274843	Simple mode	10	0.101253	0.0633269	0.144308	1.10656	0.977392	1.25279	12.441	8	0.132587	0.00669526	0.499753	0.133
229	TNF-related apoptosis-inducing ligand levels	ebi-a-GCST90027164	Amyotrophic lateral sclerosis || id:ebi-a-GCST90027164	90274843	Weighted mode	10	0.0990126	0.0574644	0.11898	1.10408	0.986475	1.23571	12.441	8	0.132587	0.00669526	0.499753	0.133
230	Neurturin levels	ebi-a-GCST90027164	Amyotrophic lateral sclerosis || id:ebi-a-GCST90027164	90274828	Inverse variance weighted	2	0.212628	0.103501	0.0399402	1.23692	1.00981	1.51511	#N/A	#N/A	#N/A	NA	NA	#N/A
231	Oncostatin-M levels	ebi-a-GCST90027164	Amyotrophic lateral sclerosis || id:ebi-a-GCST90027164	90274831	MR Egger	7	-0.0555596	0.238876	0.825302	0.945956	0.592292	1.5108	8.6375	5	0.124426	-0.00192474	0.94058	0.26
232	Oncostatin-M levels	ebi-a-GCST90027164	Amyotrophic lateral sclerosis || id:ebi-a-GCST90027164	90274831	Weighted median	7	-0.142809	0.0834458	0.0870075	0.86692	0.73612	1.02096	8.6375	5	0.124426	-0.00192474	0.94058	0.26
233	Oncostatin-M levels	ebi-a-GCST90027164	Amyotrophic lateral sclerosis || id:ebi-a-GCST90027164	90274831	Inverse variance weighted	7	-0.0731525	0.0745298	0.326336	0.929459	0.803136	1.07565	8.6375	5	0.124426	-0.00192474	0.94058	0.26
234	Oncostatin-M levels	ebi-a-GCST90027164	Amyotrophic lateral sclerosis || id:ebi-a-GCST90027164	90274831	Simple mode	7	-0.185508	0.13356	0.214208	0.830682	0.639361	1.07925	8.6375	5	0.124426	-0.00192474	0.94058	0.26
235	Oncostatin-M levels	ebi-a-GCST90027164	Amyotrophic lateral sclerosis || id:ebi-a-GCST90027164	90274831	Weighted mode	7	-0.150169	0.0904795	0.148045	0.860563	0.720717	1.02754	8.6375	5	0.124426	-0.00192474	0.94058	0.26
236	C-X-C motif chemokine 11 levels	ebi-a-GCST90027164	Amyotrophic lateral sclerosis || id:ebi-a-GCST90027164	90274781	MR Egger	10	0.117417	0.0681865	0.123371	1.12459	0.983903	1.28539	8.60215	8	0.37696	-0.0207639	0.0532996	0.147
237	C-X-C motif chemokine 11 levels	ebi-a-GCST90027164	Amyotrophic lateral sclerosis || id:ebi-a-GCST90027164	90274781	Weighted median	10	-0.0314746	0.0533519	0.555228	0.969016	0.872804	1.07583	8.60215	8	0.37696	-0.0207639	0.0532996	0.147
238	C-X-C motif chemokine 11 levels	ebi-a-GCST90027164	Amyotrophic lateral sclerosis || id:ebi-a-GCST90027164	90274781	Inverse variance weighted	10	-0.0103038	0.0463081	0.82392	0.989749	0.903872	1.08379	8.60215	8	0.37696	-0.0207639	0.0532996	0.147
239	C-X-C motif chemokine 11 levels	ebi-a-GCST90027164	Amyotrophic lateral sclerosis || id:ebi-a-GCST90027164	90274781	Simple mode	10	-0.0107727	0.0907367	0.908101	0.989285	0.828104	1.18184	8.60215	8	0.37696	-0.0207639	0.0532996	0.147
240	C-X-C motif chemokine 11 levels	ebi-a-GCST90027164	Amyotrophic lateral sclerosis || id:ebi-a-GCST90027164	90274781	Weighted mode	10	-0.0242458	0.0657605	0.720876	0.976046	0.858013	1.11032	8.60215	8	0.37696	-0.0207639	0.0532996	0.147
241	Fibroblast growth factor 19 levels	ebi-a-GCST90027164	Amyotrophic lateral sclerosis || id:ebi-a-GCST90027164	90274787	MR Egger	3	0.0850676	0.189042	0.730806	1.08879	0.751672	1.5771	0.0698145	1	0.791607	-0.00281206	0.924938	#N/A
242	Fibroblast growth factor 19 levels	ebi-a-GCST90027164	Amyotrophic lateral sclerosis || id:ebi-a-GCST90027164	90274787	Weighted median	3	0.0675	0.0548132	0.218153	1.06983	0.960853	1.19117	0.0698145	1	0.791607	-0.00281206	0.924938	#N/A
243	Fibroblast growth factor 19 levels	ebi-a-GCST90027164	Amyotrophic lateral sclerosis || id:ebi-a-GCST90027164	90274787	Inverse variance weighted	3	0.0635704	0.0529455	0.229877	1.06563	0.960595	1.18216	0.0698145	1	0.791607	-0.00281206	0.924938	#N/A
244	Fibroblast growth factor 19 levels	ebi-a-GCST90027164	Amyotrophic lateral sclerosis || id:ebi-a-GCST90027164	90274787	Simple mode	3	0.0728508	0.0744193	0.430848	1.07557	0.929591	1.24447	0.0698145	1	0.791607	-0.00281206	0.924938	#N/A
245	Fibroblast growth factor 19 levels	ebi-a-GCST90027164	Amyotrophic lateral sclerosis || id:ebi-a-GCST90027164	90274787	Weighted mode	3	0.0720104	0.0657115	0.387483	1.07467	0.944798	1.22239	0.0698145	1	0.791607	-0.00281206	0.924938	#N/A
246	Leukemia inhibitory factor receptor levels	ebi-a-GCST90027164	Amyotrophic lateral sclerosis || id:ebi-a-GCST90027164	90274820	MR Egger	4	-0.129335	0.101383	0.330189	0.878679	0.72033	1.07184	2.9662	2	0.226933	0.00804087	0.712724	0.566
247	Leukemia inhibitory factor receptor levels	ebi-a-GCST90027164	Amyotrophic lateral sclerosis || id:ebi-a-GCST90027164	90274820	Weighted median	4	-0.0824503	0.0449228	0.0664494	0.920857	0.843244	1.00561	2.9662	2	0.226933	0.00804087	0.712724	0.566
248	Leukemia inhibitory factor receptor levels	ebi-a-GCST90027164	Amyotrophic lateral sclerosis || id:ebi-a-GCST90027164	90274820	Inverse variance weighted	4	-0.0917655	0.0420431	0.0290611	0.912319	0.840154	0.990683	2.9662	2	0.226933	0.00804087	0.712724	0.566
249	Leukemia inhibitory factor receptor levels	ebi-a-GCST90027164	Amyotrophic lateral sclerosis || id:ebi-a-GCST90027164	90274820	Simple mode	4	-0.0439722	0.0799626	0.620675	0.956981	0.818159	1.11936	2.9662	2	0.226933	0.00804087	0.712724	0.566
250	Leukemia inhibitory factor receptor levels	ebi-a-GCST90027164	Amyotrophic lateral sclerosis || id:ebi-a-GCST90027164	90274820	Weighted mode	4	-0.0805141	0.049361	0.201361	0.922642	0.837561	1.01637	2.9662	2	0.226933	0.00804087	0.712724	0.566
251	Monocyte chemoattractant protein-1 levels	ebi-a-GCST90027164	Amyotrophic lateral sclerosis || id:ebi-a-GCST90027164	90274821	MR Egger	10	-0.0185639	0.0729063	0.805434	0.981607	0.8509	1.13239	6.29535	8	0.614186	0.0046273	0.662499	0.737
252	Monocyte chemoattractant protein-1 levels	ebi-a-GCST90027164	Amyotrophic lateral sclerosis || id:ebi-a-GCST90027164	90274821	Weighted median	10	0.0176671	0.0460534	0.701259	1.01782	0.929975	1.11397	6.29535	8	0.614186	0.0046273	0.662499	0.737
253	Monocyte chemoattractant protein-1 levels	ebi-a-GCST90027164	Amyotrophic lateral sclerosis || id:ebi-a-GCST90027164	90274821	Inverse variance weighted	10	0.00991004	0.0369663	0.788635	1.00996	0.939372	1.08585	6.29535	8	0.614186	0.0046273	0.662499	0.737
254	Monocyte chemoattractant protein-1 levels	ebi-a-GCST90027164	Amyotrophic lateral sclerosis || id:ebi-a-GCST90027164	90274821	Simple mode	10	0.0117861	0.0661072	0.862446	1.01186	0.888888	1.15183	6.29535	8	0.614186	0.0046273	0.662499	0.737
255	Monocyte chemoattractant protein-1 levels	ebi-a-GCST90027164	Amyotrophic lateral sclerosis || id:ebi-a-GCST90027164	90274821	Weighted mode	10	0.026177	0.0483112	0.601083	1.02652	0.933781	1.12847	6.29535	8	0.614186	0.0046273	0.662499	0.737
256	Interleukin-1-alpha levels	ebi-a-GCST90027164	Amyotrophic lateral sclerosis || id:ebi-a-GCST90027164	90274805	MR Egger	4	-0.368275	0.344987	0.397531	0.691927	0.351885	1.36056	0.339796	2	0.843751	0.0453036	0.282394	0.505
257	Interleukin-1-alpha levels	ebi-a-GCST90027164	Amyotrophic lateral sclerosis || id:ebi-a-GCST90027164	90274805	Weighted median	4	0.0728116	0.116073	0.530467	1.07553	0.85668	1.35028	0.339796	2	0.843751	0.0453036	0.282394	0.505
258	Interleukin-1-alpha levels	ebi-a-GCST90027164	Amyotrophic lateral sclerosis || id:ebi-a-GCST90027164	90274805	Inverse variance weighted	4	0.116143	0.0922045	0.207803	1.12316	0.937464	1.34563	0.339796	2	0.843751	0.0453036	0.282394	0.505
259	Interleukin-1-alpha levels	ebi-a-GCST90027164	Amyotrophic lateral sclerosis || id:ebi-a-GCST90027164	90274805	Simple mode	4	0.0441445	0.153423	0.792285	1.04513	0.773705	1.41178	0.339796	2	0.843751	0.0453036	0.282394	0.505
260	Interleukin-1-alpha levels	ebi-a-GCST90027164	Amyotrophic lateral sclerosis || id:ebi-a-GCST90027164	90274805	Weighted mode	4	0.0822429	0.152095	0.626258	1.08572	0.805846	1.46279	0.339796	2	0.843751	0.0453036	0.282394	0.505
261	Tumor necrosis factor levels	ebi-a-GCST90027164	Amyotrophic lateral sclerosis || id:ebi-a-GCST90027164	90274839	Wald ratio	1	0.0636152	0.16602	0.701588	1.06568	0.769677	1.47553	#N/A	#N/A	#N/A	#N/A	#N/A	#N/A
262	T-cell surface glycoprotein CD5 levels	ebi-a-GCST90027164	Amyotrophic lateral sclerosis || id:ebi-a-GCST90027164	90274773	MR Egger	10	0.0860365	0.189629	0.662094	1.08985	0.751535	1.58045	13.1523	8	0.106714	-0.0151514	0.490868	0.146
263	T-cell surface glycoprotein CD5 levels	ebi-a-GCST90027164	Amyotrophic lateral sclerosis || id:ebi-a-GCST90027164	90274773	Weighted median	10	-0.0658317	0.0584918	0.260383	0.936288	0.834873	1.05002	13.1523	8	0.106714	-0.0151514	0.490868	0.146
264	T-cell surface glycoprotein CD5 levels	ebi-a-GCST90027164	Amyotrophic lateral sclerosis || id:ebi-a-GCST90027164	90274773	Inverse variance weighted	10	-0.0444479	0.0558595	0.426201	0.956525	0.85733	1.0672	13.1523	8	0.106714	-0.0151514	0.490868	0.146
265	T-cell surface glycoprotein CD5 levels	ebi-a-GCST90027164	Amyotrophic lateral sclerosis || id:ebi-a-GCST90027164	90274773	Simple mode	10	-0.051667	0.0889029	0.575394	0.949645	0.797785	1.13041	13.1523	8	0.106714	-0.0151514	0.490868	0.146
266	T-cell surface glycoprotein CD5 levels	ebi-a-GCST90027164	Amyotrophic lateral sclerosis || id:ebi-a-GCST90027164	90274773	Weighted mode	10	-0.0710119	0.0714024	0.34595	0.931451	0.809806	1.07137	13.1523	8	0.106714	-0.0151514	0.490868	0.146
267	Matrix metalloproteinase-10 levels	ebi-a-GCST90027164	Amyotrophic lateral sclerosis || id:ebi-a-GCST90027164	90274827	MR Egger	11	0.0319871	0.0339798	0.371102	1.0325	0.965979	1.10361	7.76349	9	0.558146	-0.00049264	0.956194	0.699
268	Matrix metalloproteinase-10 levels	ebi-a-GCST90027164	Amyotrophic lateral sclerosis || id:ebi-a-GCST90027164	90274827	Weighted median	11	0.0222744	0.029216	0.44582	1.02252	0.965616	1.08279	7.76349	9	0.558146	-0.00049264	0.956194	0.699
269	Matrix metalloproteinase-10 levels	ebi-a-GCST90027164	Amyotrophic lateral sclerosis || id:ebi-a-GCST90027164	90274827	Inverse variance weighted	11	0.0305736	0.0229852	0.18347	1.03105	0.985627	1.07856	7.76349	9	0.558146	-0.00049264	0.956194	0.699
270	Matrix metalloproteinase-10 levels	ebi-a-GCST90027164	Amyotrophic lateral sclerosis || id:ebi-a-GCST90027164	90274827	Simple mode	11	0.00658949	0.0472652	0.89189	1.00661	0.917548	1.10432	7.76349	9	0.558146	-0.00049264	0.956194	0.699
271	Matrix metalloproteinase-10 levels	ebi-a-GCST90027164	Amyotrophic lateral sclerosis || id:ebi-a-GCST90027164	90274827	Weighted mode	11	0.0215886	0.0270761	0.443779	1.02182	0.96901	1.07752	7.76349	9	0.558146	-0.00049264	0.956194	0.699
272	Fibroblast growth factor 5 levels	ebi-a-GCST90027164	Amyotrophic lateral sclerosis || id:ebi-a-GCST90027164	90274790	MR Egger	6	0.0206107	0.0709245	0.785801	1.02082	0.888339	1.17307	7.47343	4	0.112887	0.00826323	0.710479	0.372
273	Fibroblast growth factor 5 levels	ebi-a-GCST90027164	Amyotrophic lateral sclerosis || id:ebi-a-GCST90027164	90274790	Weighted median	6	0.0369431	0.0274327	0.178083	1.03763	0.983316	1.09495	7.47343	4	0.112887	0.00826323	0.710479	0.372
274	Fibroblast growth factor 5 levels	ebi-a-GCST90027164	Amyotrophic lateral sclerosis || id:ebi-a-GCST90027164	90274790	Inverse variance weighted	6	0.0452099	0.0319033	0.156456	1.04625	0.982829	1.11376	7.47343	4	0.112887	0.00826323	0.710479	0.372
275	Fibroblast growth factor 5 levels	ebi-a-GCST90027164	Amyotrophic lateral sclerosis || id:ebi-a-GCST90027164	90274790	Simple mode	6	0.0487538	0.102997	0.655908	1.04996	0.858026	1.28483	7.47343	4	0.112887	0.00826323	0.710479	0.372
276	Fibroblast growth factor 5 levels	ebi-a-GCST90027164	Amyotrophic lateral sclerosis || id:ebi-a-GCST90027164	90274790	Weighted mode	6	0.0322791	0.0263082	0.274455	1.03281	0.9809	1.08746	7.47343	4	0.112887	0.00826323	0.710479	0.372
277	Natural killer cell receptor 2B4 levels	ebi-a-GCST90027164	Amyotrophic lateral sclerosis || id:ebi-a-GCST90027164	90274771	MR Egger	8	0.0916003	0.0969491	0.381222	1.09593	0.906268	1.32528	7.5623	6	0.271955	-0.00734258	0.523041	0.394
278	Natural killer cell receptor 2B4 levels	ebi-a-GCST90027164	Amyotrophic lateral sclerosis || id:ebi-a-GCST90027164	90274771	Weighted median	8	0.0445591	0.0486919	0.360127	1.04557	0.950395	1.15027	7.5623	6	0.271955	-0.00734258	0.523041	0.394
279	Natural killer cell receptor 2B4 levels	ebi-a-GCST90027164	Amyotrophic lateral sclerosis || id:ebi-a-GCST90027164	90274771	Inverse variance weighted	8	0.033306	0.0430326	0.438948	1.03387	0.950243	1.12485	7.5623	6	0.271955	-0.00734258	0.523041	0.394
280	Natural killer cell receptor 2B4 levels	ebi-a-GCST90027164	Amyotrophic lateral sclerosis || id:ebi-a-GCST90027164	90274771	Simple mode	8	-0.0324972	0.101507	0.7582	0.968025	0.793382	1.18111	7.5623	6	0.271955	-0.00734258	0.523041	0.394
281	Natural killer cell receptor 2B4 levels	ebi-a-GCST90027164	Amyotrophic lateral sclerosis || id:ebi-a-GCST90027164	90274771	Weighted mode	8	0.0555238	0.0496677	0.300501	1.05709	0.959038	1.16518	7.5623	6	0.271955	-0.00734258	0.523041	0.394
282	Interleukin-13 levels	ebi-a-GCST90027164	Amyotrophic lateral sclerosis || id:ebi-a-GCST90027164	90274799	MR Egger	3	0.367546	0.7886	0.722344	1.44419	0.30786	6.77475	0.0295359	1	0.863548	-0.0172712	0.822864	#N/A
283	Interleukin-13 levels	ebi-a-GCST90027164	Amyotrophic lateral sclerosis || id:ebi-a-GCST90027164	90274799	Weighted median	3	0.152129	0.111053	0.170728	1.16431	0.936565	1.44744	0.0295359	1	0.863548	-0.0172712	0.822864	#N/A
284	Interleukin-13 levels	ebi-a-GCST90027164	Amyotrophic lateral sclerosis || id:ebi-a-GCST90027164	90274799	Inverse variance weighted	3	0.143844	0.0928027	0.121143	1.1547	0.962665	1.38505	0.0295359	1	0.863548	-0.0172712	0.822864	#N/A
285	Interleukin-13 levels	ebi-a-GCST90027164	Amyotrophic lateral sclerosis || id:ebi-a-GCST90027164	90274799	Simple mode	3	0.162671	0.137947	0.359584	1.17665	0.897894	1.54195	0.0295359	1	0.863548	-0.0172712	0.822864	#N/A
286	Interleukin-13 levels	ebi-a-GCST90027164	Amyotrophic lateral sclerosis || id:ebi-a-GCST90027164	90274799	Weighted mode	3	0.160874	0.121837	0.317551	1.17454	0.925033	1.49134	0.0295359	1	0.863548	-0.0172712	0.822864	#N/A
287	Interleukin-33 levels	ebi-a-GCST90027164	Amyotrophic lateral sclerosis || id:ebi-a-GCST90027164	90274812	Wald ratio	1	0.215859	0.162996	0.185395	1.24093	0.901575	1.70801	#N/A	#N/A	#N/A	#N/A	#N/A	#N/A
288	Transforming growth factor-alpha levels	ebi-a-GCST90027164	Amyotrophic lateral sclerosis || id:ebi-a-GCST90027164	90274838	MR Egger	6	0.408729	0.177061	0.0821757	1.5049	1.06363	2.12925	1.26846	4	0.866703	-0.0475158	0.054012	0.177
289	Transforming growth factor-alpha levels	ebi-a-GCST90027164	Amyotrophic lateral sclerosis || id:ebi-a-GCST90027164	90274838	Weighted median	6	-0.0314531	0.0976173	0.747295	0.969036	0.800289	1.17337	1.26846	4	0.866703	-0.0475158	0.054012	0.177
290	Transforming growth factor-alpha levels	ebi-a-GCST90027164	Amyotrophic lateral sclerosis || id:ebi-a-GCST90027164	90274838	Inverse variance weighted	6	-0.0275018	0.095067	0.772361	0.972873	0.807483	1.17214	1.26846	4	0.866703	-0.0475158	0.054012	0.177
291	Transforming growth factor-alpha levels	ebi-a-GCST90027164	Amyotrophic lateral sclerosis || id:ebi-a-GCST90027164	90274838	Simple mode	6	-0.246784	0.191992	0.254972	0.78131	0.536286	1.13828	1.26846	4	0.866703	-0.0475158	0.054012	0.177
292	Transforming growth factor-alpha levels	ebi-a-GCST90027164	Amyotrophic lateral sclerosis || id:ebi-a-GCST90027164	90274838	Weighted mode	6	0.1089	0.131867	0.4465	1.11505	0.861088	1.44392	1.26846	4	0.866703	-0.0475158	0.054012	0.177
293	Tumor necrosis factor receptor superfamily member 9 levels	ebi-a-GCST90027164	Amyotrophic lateral sclerosis || id:ebi-a-GCST90027164	90274841	MR Egger	6	0.209326	0.233491	0.42066	1.23285	0.780113	1.94832	3.62368	4	0.459323	-0.0301657	0.325997	0.466
294	Tumor necrosis factor receptor superfamily member 9 levels	ebi-a-GCST90027164	Amyotrophic lateral sclerosis || id:ebi-a-GCST90027164	90274841	Weighted median	6	-0.0156261	0.0725372	0.829439	0.984495	0.854021	1.1349	3.62368	4	0.459323	-0.0301657	0.325997	0.466
295	Tumor necrosis factor receptor superfamily member 9 levels	ebi-a-GCST90027164	Amyotrophic lateral sclerosis || id:ebi-a-GCST90027164	90274841	Inverse variance weighted	6	-0.0440677	0.0564955	0.435379	0.956889	0.856587	1.06894	3.62368	4	0.459323	-0.0301657	0.325997	0.466
296	Tumor necrosis factor receptor superfamily member 9 levels	ebi-a-GCST90027164	Amyotrophic lateral sclerosis || id:ebi-a-GCST90027164	90274841	Simple mode	6	0.0333435	0.11063	0.775244	1.03391	0.832359	1.28425	3.62368	4	0.459323	-0.0301657	0.325997	0.466
297	Tumor necrosis factor receptor superfamily member 9 levels	ebi-a-GCST90027164	Amyotrophic lateral sclerosis || id:ebi-a-GCST90027164	90274841	Weighted mode	6	-0.0836337	0.0812405	0.350465	0.919768	0.784377	1.07853	3.62368	4	0.459323	-0.0301657	0.325997	0.466
298	Interleukin-18 levels	ebi-a-GCST90027164	Amyotrophic lateral sclerosis || id:ebi-a-GCST90027164	90274803	MR Egger	7	-0.0498056	0.147226	0.748885	0.951414	0.712932	1.26967	4.20539	5	0.52024	0.00666311	0.803132	0.646
299	Interleukin-18 levels	ebi-a-GCST90027164	Amyotrophic lateral sclerosis || id:ebi-a-GCST90027164	90274803	Weighted median	7	-0.0001309	0.047982	0.997823	0.999869	0.910123	1.09847	4.20539	5	0.52024	0.00666311	0.803132	0.646
300	Interleukin-18 levels	ebi-a-GCST90027164	Amyotrophic lateral sclerosis || id:ebi-a-GCST90027164	90274803	Inverse variance weighted	7	-0.012501	0.0392138	0.749886	0.987577	0.914516	1.06647	4.20539	5	0.52024	0.00666311	0.803132	0.646
301	Interleukin-18 levels	ebi-a-GCST90027164	Amyotrophic lateral sclerosis || id:ebi-a-GCST90027164	90274803	Simple mode	7	-0.00187874	0.076435	0.981187	0.998123	0.859253	1.15944	4.20539	5	0.52024	0.00666311	0.803132	0.646
302	Interleukin-18 levels	ebi-a-GCST90027164	Amyotrophic lateral sclerosis || id:ebi-a-GCST90027164	90274803	Weighted mode	7	0.00671724	0.0485659	0.894519	1.00674	0.915329	1.10728	4.20539	5	0.52024	0.00666311	0.803132	0.646
303	C-C motif chemokine 28 levels	ebi-a-GCST90027164	Amyotrophic lateral sclerosis || id:ebi-a-GCST90027164	90274769	MR Egger	7	0.135548	0.167215	0.454421	1.14516	0.825147	1.58929	2.00012	5	0.849128	-0.00948166	0.553893	0.877
304	C-C motif chemokine 28 levels	ebi-a-GCST90027164	Amyotrophic lateral sclerosis || id:ebi-a-GCST90027164	90274769	Weighted median	7	0.0506647	0.0840267	0.546536	1.05197	0.892233	1.2403	2.00012	5	0.849128	-0.00948166	0.553893	0.877
305	C-C motif chemokine 28 levels	ebi-a-GCST90027164	Amyotrophic lateral sclerosis || id:ebi-a-GCST90027164	90274769	Inverse variance weighted	7	0.0384752	0.0672636	0.567317	1.03923	0.910864	1.18567	2.00012	5	0.849128	-0.00948166	0.553893	0.877
306	C-C motif chemokine 28 levels	ebi-a-GCST90027164	Amyotrophic lateral sclerosis || id:ebi-a-GCST90027164	90274769	Simple mode	7	0.0800751	0.125222	0.546146	1.08337	0.847588	1.38474	2.00012	5	0.849128	-0.00948166	0.553893	0.877
307	C-C motif chemokine 28 levels	ebi-a-GCST90027164	Amyotrophic lateral sclerosis || id:ebi-a-GCST90027164	90274769	Weighted mode	7	0.0814581	0.123321	0.533433	1.08487	0.85193	1.3815	2.00012	5	0.849128	-0.00948166	0.553893	0.877
308	Osteoprotegerin levels	ebi-a-GCST90027164	Amyotrophic lateral sclerosis || id:ebi-a-GCST90027164	90274830	MR Egger	11	-0.113608	0.122049	0.37623	0.892608	0.7027	1.13384	16.1628	9	0.0635597	-0.000369121	0.97902	0.118
309	Osteoprotegerin levels	ebi-a-GCST90027164	Amyotrophic lateral sclerosis || id:ebi-a-GCST90027164	90274830	Weighted median	11	-0.146028	0.0575914	0.0112257	0.864133	0.771894	0.967394	16.1628	9	0.0635597	-0.000369121	0.97902	0.118
310	Osteoprotegerin levels	ebi-a-GCST90027164	Amyotrophic lateral sclerosis || id:ebi-a-GCST90027164	90274830	Inverse variance weighted	11	-0.116582	0.0502047	0.020226	0.889957	0.806555	0.981984	16.1628	9	0.0635597	-0.000369121	0.97902	0.118
311	Osteoprotegerin levels	ebi-a-GCST90027164	Amyotrophic lateral sclerosis || id:ebi-a-GCST90027164	90274830	Simple mode	11	-0.212813	0.110251	0.0824	0.808308	0.651222	1.00329	16.1628	9	0.0635597	-0.000369121	0.97902	0.118
312	Osteoprotegerin levels	ebi-a-GCST90027164	Amyotrophic lateral sclerosis || id:ebi-a-GCST90027164	90274830	Weighted mode	11	-0.112651	0.0656699	0.117034	0.893462	0.785556	1.01619	16.1628	9	0.0635597	-0.000369121	0.97902	0.118
313	Fibroblast growth factor 23 levels	ebi-a-GCST90027164	Amyotrophic lateral sclerosis || id:ebi-a-GCST90027164	90274789	MR Egger	4	0.549862	0.427846	0.327459	1.73301	0.749226	4.00859	1.06829	2	0.586169	-0.0492038	0.355031	0.566
314	Fibroblast growth factor 23 levels	ebi-a-GCST90027164	Amyotrophic lateral sclerosis || id:ebi-a-GCST90027164	90274789	Weighted median	4	0.0575764	0.0890747	0.518031	1.05927	0.889576	1.26133	1.06829	2	0.586169	-0.0492038	0.355031	0.566
315	Fibroblast growth factor 23 levels	ebi-a-GCST90027164	Amyotrophic lateral sclerosis || id:ebi-a-GCST90027164	90274789	Inverse variance weighted	4	0.0468554	0.0737785	0.525375	1.04797	0.906875	1.21102	1.06829	2	0.586169	-0.0492038	0.355031	0.566
316	Fibroblast growth factor 23 levels	ebi-a-GCST90027164	Amyotrophic lateral sclerosis || id:ebi-a-GCST90027164	90274789	Simple mode	4	0.0836027	0.13081	0.5682	1.0872	0.841319	1.40493	1.06829	2	0.586169	-0.0492038	0.355031	0.566
317	Fibroblast growth factor 23 levels	ebi-a-GCST90027164	Amyotrophic lateral sclerosis || id:ebi-a-GCST90027164	90274789	Weighted mode	4	0.0771324	0.100347	0.498066	1.08019	0.887321	1.31497	1.06829	2	0.586169	-0.0492038	0.355031	0.566
318	Interleukin-6 levels	ebi-a-GCST90027164	Amyotrophic lateral sclerosis || id:ebi-a-GCST90027164	90274815	Wald ratio	1	0.0671021	0.067696	0.321574	1.0694	0.936522	1.22114	#N/A	#N/A	#N/A	#N/A	#N/A	#N/A
319	Monocyte chemoattractant protein 2 levels	ebi-a-GCST90027164	Amyotrophic lateral sclerosis || id:ebi-a-GCST90027164	90274822	MR Egger	14	-0.0155416	0.023476	0.520469	0.984579	0.940302	1.03094	8.53856	12	0.741756	0.00479572	0.563979	0.794
320	Monocyte chemoattractant protein 2 levels	ebi-a-GCST90027164	Amyotrophic lateral sclerosis || id:ebi-a-GCST90027164	90274822	Weighted median	14	-0.000956453	0.0213575	0.96428	0.999044	0.958087	1.04175	8.53856	12	0.741756	0.00479572	0.563979	0.794
321	Monocyte chemoattractant protein 2 levels	ebi-a-GCST90027164	Amyotrophic lateral sclerosis || id:ebi-a-GCST90027164	90274822	Inverse variance weighted	14	-0.00553479	0.0163302	0.734662	0.99448	0.963154	1.02683	8.53856	12	0.741756	0.00479572	0.563979	0.794
322	Monocyte chemoattractant protein 2 levels	ebi-a-GCST90027164	Amyotrophic lateral sclerosis || id:ebi-a-GCST90027164	90274822	Simple mode	14	-0.0138115	0.0326764	0.67944	0.986283	0.925096	1.05152	8.53856	12	0.741756	0.00479572	0.563979	0.794
323	Monocyte chemoattractant protein 2 levels	ebi-a-GCST90027164	Amyotrophic lateral sclerosis || id:ebi-a-GCST90027164	90274822	Weighted mode	14	-0.0138115	0.0195326	0.491986	0.986283	0.949238	1.02477	8.53856	12	0.741756	0.00479572	0.563979	0.794
324	beta-nerve growth factor levels	ebi-a-GCST90027164	Amyotrophic lateral sclerosis || id:ebi-a-GCST90027164	90274762	MR Egger	4	-0.0351911	0.238406	0.896188	0.965421	0.605036	1.54047	0.5331	2	0.766018	0.00407212	0.86262	0.916
325	beta-nerve growth factor levels	ebi-a-GCST90027164	Amyotrophic lateral sclerosis || id:ebi-a-GCST90027164	90274762	Weighted median	4	-0.0169651	0.0878634	0.846893	0.983178	0.82764	1.16795	0.5331	2	0.766018	0.00407212	0.86262	0.916
326	beta-nerve growth factor levels	ebi-a-GCST90027164	Amyotrophic lateral sclerosis || id:ebi-a-GCST90027164	90274762	Inverse variance weighted	4	0.00896473	0.0784779	0.909053	1.00901	0.86515	1.17678	0.5331	2	0.766018	0.00407212	0.86262	0.916
327	beta-nerve growth factor levels	ebi-a-GCST90027164	Amyotrophic lateral sclerosis || id:ebi-a-GCST90027164	90274762	Simple mode	4	-0.0181967	0.121181	0.890165	0.981968	0.774366	1.24523	0.5331	2	0.766018	0.00407212	0.86262	0.916
328	beta-nerve growth factor levels	ebi-a-GCST90027164	Amyotrophic lateral sclerosis || id:ebi-a-GCST90027164	90274762	Weighted mode	4	-0.0189599	0.112173	0.876531	0.981219	0.787558	1.2225	0.5331	2	0.766018	0.00407212	0.86262	0.916
329	Fractalkine levels	ebi-a-GCST90027164	Amyotrophic lateral sclerosis || id:ebi-a-GCST90027164	90274778	MR Egger	10	-0.215816	0.186099	0.279617	0.805884	0.559579	1.1606	6.92325	8	0.544935	0.0132221	0.413431	0.59
330	Fractalkine levels	ebi-a-GCST90027164	Amyotrophic lateral sclerosis || id:ebi-a-GCST90027164	90274778	Weighted median	10	-0.0509027	0.071558	0.476868	0.950371	0.826003	1.09346	6.92325	8	0.544935	0.0132221	0.413431	0.59
331	Fractalkine levels	ebi-a-GCST90027164	Amyotrophic lateral sclerosis || id:ebi-a-GCST90027164	90274778	Inverse variance weighted	10	-0.0621205	0.0537681	0.24795	0.93977	0.845772	1.04421	6.92325	8	0.544935	0.0132221	0.413431	0.59
332	Fractalkine levels	ebi-a-GCST90027164	Amyotrophic lateral sclerosis || id:ebi-a-GCST90027164	90274778	Simple mode	10	0.0195846	0.125817	0.879737	1.01978	0.796907	1.30498	6.92325	8	0.544935	0.0132221	0.413431	0.59
333	Fractalkine levels	ebi-a-GCST90027164	Amyotrophic lateral sclerosis || id:ebi-a-GCST90027164	90274778	Weighted mode	10	-0.109252	0.121375	0.391505	0.896505	0.706702	1.13728	6.92325	8	0.544935	0.0132221	0.413431	0.59
334	TNF-related activation-induced cytokine levels	ebi-a-GCST90027164	Amyotrophic lateral sclerosis || id:ebi-a-GCST90027164	90274844	MR Egger	11	0.0485121	0.081535	0.56651	1.04971	0.894673	1.23161	11.5209	9	0.241688	-0.00613203	0.589399	0.287
335	TNF-related activation-induced cytokine levels	ebi-a-GCST90027164	Amyotrophic lateral sclerosis || id:ebi-a-GCST90027164	90274844	Weighted median	11	0.0462743	0.0434132	0.286466	1.04736	0.961928	1.14038	11.5209	9	0.241688	-0.00613203	0.589399	0.287
336	TNF-related activation-induced cytokine levels	ebi-a-GCST90027164	Amyotrophic lateral sclerosis || id:ebi-a-GCST90027164	90274844	Inverse variance weighted	11	0.00789188	0.0358386	0.82571	1.00792	0.939552	1.08127	11.5209	9	0.241688	-0.00613203	0.589399	0.287
337	TNF-related activation-induced cytokine levels	ebi-a-GCST90027164	Amyotrophic lateral sclerosis || id:ebi-a-GCST90027164	90274844	Simple mode	11	0.0696658	0.062893	0.293928	1.07215	0.947807	1.21281	11.5209	9	0.241688	-0.00613203	0.589399	0.287
338	TNF-related activation-induced cytokine levels	ebi-a-GCST90027164	Amyotrophic lateral sclerosis || id:ebi-a-GCST90027164	90274844	Weighted mode	11	0.0745941	0.0507951	0.1727	1.07745	0.975345	1.19024	11.5209	9	0.241688	-0.00613203	0.589399	0.287
339	C-C motif chemokine 4 levels	ebi-a-GCST90027164	Amyotrophic lateral sclerosis || id:ebi-a-GCST90027164	90274770	MR Egger	9	0.0257498	0.0435607	0.573021	1.02608	0.942114	1.11754	9.54731	7	0.215711	-0.0150282	0.193021	0.193
340	C-C motif chemokine 4 levels	ebi-a-GCST90027164	Amyotrophic lateral sclerosis || id:ebi-a-GCST90027164	90274770	Weighted median	9	0.00435878	0.0295083	0.882569	1.00437	0.947927	1.06417	9.54731	7	0.215711	-0.0150282	0.193021	0.193
341	C-C motif chemokine 4 levels	ebi-a-GCST90027164	Amyotrophic lateral sclerosis || id:ebi-a-GCST90027164	90274770	Inverse variance weighted	9	-0.0213601	0.0306345	0.485642	0.978866	0.921821	1.03944	9.54731	7	0.215711	-0.0150282	0.193021	0.193
342	C-C motif chemokine 4 levels	ebi-a-GCST90027164	Amyotrophic lateral sclerosis || id:ebi-a-GCST90027164	90274770	Simple mode	9	0.0103242	0.0633238	0.874531	1.01038	0.892445	1.14389	9.54731	7	0.215711	-0.0150282	0.193021	0.193
343	C-C motif chemokine 4 levels	ebi-a-GCST90027164	Amyotrophic lateral sclerosis || id:ebi-a-GCST90027164	90274770	Weighted mode	9	0.00628048	0.0287902	0.832777	1.0063	0.951088	1.06472	9.54731	7	0.215711	-0.0150282	0.193021	0.193
344	Adenosine Deaminase levels	ebi-a-GCST90027164	Amyotrophic lateral sclerosis || id:ebi-a-GCST90027164	90274759	MR Egger	5	0.0601824	0.04586	0.280791	1.06203	0.970734	1.16191	6.65378	3	0.0837911	0.00410919	0.820178	0.339
345	Adenosine Deaminase levels	ebi-a-GCST90027164	Amyotrophic lateral sclerosis || id:ebi-a-GCST90027164	90274759	Weighted median	5	0.0790274	0.0272648	0.0037494	1.08223	1.02592	1.14164	6.65378	3	0.0837911	0.00410919	0.820178	0.339
346	Adenosine Deaminase levels	ebi-a-GCST90027164	Amyotrophic lateral sclerosis || id:ebi-a-GCST90027164	90274759	Inverse variance weighted	5	0.0676825	0.0301559	0.0248054	1.07003	1.00861	1.13518	6.65378	3	0.0837911	0.00410919	0.820178	0.339
347	Adenosine Deaminase levels	ebi-a-GCST90027164	Amyotrophic lateral sclerosis || id:ebi-a-GCST90027164	90274759	Simple mode	5	0.0156784	0.0623057	0.813722	1.0158	0.899028	1.14774	6.65378	3	0.0837911	0.00410919	0.820178	0.339
348	Adenosine Deaminase levels	ebi-a-GCST90027164	Amyotrophic lateral sclerosis || id:ebi-a-GCST90027164	90274759	Weighted mode	5	0.0861971	0.0292549	0.0421191	1.09002	1.02928	1.15435	6.65378	3	0.0837911	0.00410919	0.820178	0.339
349	C-X-C motif chemokine 5 levels	ebi-a-GCST90027164	Amyotrophic lateral sclerosis || id:ebi-a-GCST90027164	90274782	MR Egger	6	0.0211089	0.0448808	0.662617	1.02133	0.935328	1.11525	1.35258	4	0.852394	0.00469055	0.574375	0.89
350	C-X-C motif chemokine 5 levels	ebi-a-GCST90027164	Amyotrophic lateral sclerosis || id:ebi-a-GCST90027164	90274782	Weighted median	6	0.0347139	0.0334762	0.299748	1.03532	0.969573	1.10553	1.35258	4	0.852394	0.00469055	0.574375	0.89
351	C-X-C motif chemokine 5 levels	ebi-a-GCST90027164	Amyotrophic lateral sclerosis || id:ebi-a-GCST90027164	90274782	Inverse variance weighted	6	0.041175	0.0305743	0.178071	1.04203	0.981424	1.10639	1.35258	4	0.852394	0.00469055	0.574375	0.89
352	C-X-C motif chemokine 5 levels	ebi-a-GCST90027164	Amyotrophic lateral sclerosis || id:ebi-a-GCST90027164	90274782	Simple mode	6	0.0657438	0.0587172	0.313738	1.06795	0.951856	1.19821	1.35258	4	0.852394	0.00469055	0.574375	0.89
353	C-X-C motif chemokine 5 levels	ebi-a-GCST90027164	Amyotrophic lateral sclerosis || id:ebi-a-GCST90027164	90274782	Weighted mode	6	0.0329729	0.0362909	0.405239	1.03352	0.962562	1.10971	1.35258	4	0.852394	0.00469055	0.574375	0.89
354	CD40L receptor levels	ebi-a-GCST90027164	Amyotrophic lateral sclerosis || id:ebi-a-GCST90027164	90274772	MR Egger	10	0.0580024	0.0454608	0.237794	1.05972	0.969378	1.15848	11.2062	8	0.190286	-0.00847752	0.367488	0.347
355	CD40L receptor levels	ebi-a-GCST90027164	Amyotrophic lateral sclerosis || id:ebi-a-GCST90027164	90274772	Weighted median	10	0.0360757	0.0285503	0.206379	1.03673	0.980314	1.0964	11.2062	8	0.190286	-0.00847752	0.367488	0.347
356	CD40L receptor levels	ebi-a-GCST90027164	Amyotrophic lateral sclerosis || id:ebi-a-GCST90027164	90274772	Inverse variance weighted	10	0.0252868	0.0297437	0.395238	1.02561	0.967528	1.08718	11.2062	8	0.190286	-0.00847752	0.367488	0.347
357	CD40L receptor levels	ebi-a-GCST90027164	Amyotrophic lateral sclerosis || id:ebi-a-GCST90027164	90274772	Simple mode	10	0.0535074	0.0686764	0.455905	1.05496	0.922103	1.20697	11.2062	8	0.190286	-0.00847752	0.367488	0.347
358	CD40L receptor levels	ebi-a-GCST90027164	Amyotrophic lateral sclerosis || id:ebi-a-GCST90027164	90274772	Weighted mode	10	0.0380479	0.0288217	0.219384	1.03878	0.981726	1.09915	11.2062	8	0.190286	-0.00847752	0.367488	0.347

## Sheet: S5
Results of Forward Mendelian Randomization Analysis between 91 inflammatory proteins and ALS (snp p<5e-6)
Select snp p_value < 5e-6, clump_kb = 5000, clump_r2 = 0.01
	id.exposure	id.outcome	outcome	exposure	method	nsnp	b	se	pval	OR	lower	upper	Q	Q_df	Q_pval(MR Egger)	egger_intercept	pval(egger_intercept)	p mr_presso
1	exposure name	ebi-a-GCST90027164	Amyotrophic lateral sclerosis || id:ebi-a-GCST90027164	90274823	MR Egger	19	0.010454	0.0853937	0.904001	1.01051	0.854775	1.19462	19.5698	17	0.296825	-0.00358835	0.69657	0.001
2	Monocyte chemoattractant protein-3 levels	ebi-a-GCST90027164	Amyotrophic lateral sclerosis || id:ebi-a-GCST90027164	90274823	Weighted median	19	-0.000476369	0.0481498	0.992106	0.999524	0.909509	1.09845	19.5698	17	0.296825	-0.00358835	0.69657	0.001
3	Monocyte chemoattractant protein-3 levels	ebi-a-GCST90027164	Amyotrophic lateral sclerosis || id:ebi-a-GCST90027164	90274823	Inverse variance weighted	19	-0.0204214	0.034276	0.551312	0.979786	0.916125	1.04787	19.5698	17	0.296825	-0.00358835	0.69657	0.001
4	Monocyte chemoattractant protein-3 levels	ebi-a-GCST90027164	Amyotrophic lateral sclerosis || id:ebi-a-GCST90027164	90274823	Simple mode	19	-0.00496866	0.0761005	0.948662	0.995044	0.857164	1.1551	19.5698	17	0.296825	-0.00358835	0.69657	0.001
5	Monocyte chemoattractant protein-3 levels	ebi-a-GCST90027164	Amyotrophic lateral sclerosis || id:ebi-a-GCST90027164	90274823	Weighted mode	19	-0.00730447	0.0609573	0.905946	0.992722	0.880927	1.11871	19.5698	17	0.296825	-0.00358835	0.69657	0.001
6	Monocyte chemoattractant protein-3 levels	ebi-a-GCST90027164	Amyotrophic lateral sclerosis || id:ebi-a-GCST90027164	90274786	MR Egger	15	0.237718	0.0883834	0.0185573	1.26835	1.06661	1.50825	12.5314	13	0.484619	-0.0219611	0.0316213	0.686
7	Protein S100-A12 levels	ebi-a-GCST90027164	Amyotrophic lateral sclerosis || id:ebi-a-GCST90027164	90274786	Weighted median	15	0.0767416	0.0606289	0.205599	1.07976	0.958783	1.21601	12.5314	13	0.484619	-0.0219611	0.0316213	0.686
8	Protein S100-A12 levels	ebi-a-GCST90027164	Amyotrophic lateral sclerosis || id:ebi-a-GCST90027164	90274786	Inverse variance weighted	15	0.0494655	0.0471581	0.294211	1.05071	0.957945	1.15246	12.5314	13	0.484619	-0.0219611	0.0316213	0.686
9	Protein S100-A12 levels	ebi-a-GCST90027164	Amyotrophic lateral sclerosis || id:ebi-a-GCST90027164	90274786	Simple mode	15	-0.0757932	0.114428	0.518493	0.927008	0.740765	1.16008	12.5314	13	0.484619	-0.0219611	0.0316213	0.686
10	Protein S100-A12 levels	ebi-a-GCST90027164	Amyotrophic lateral sclerosis || id:ebi-a-GCST90027164	90274786	Weighted mode	15	0.0853487	0.0642919	0.205579	1.0891	0.960152	1.23536	12.5314	13	0.484619	-0.0219611	0.0316213	0.686
11	Protein S100-A12 levels	ebi-a-GCST90027164	Amyotrophic lateral sclerosis || id:ebi-a-GCST90027164	90274839	MR Egger	11	-0.125045	0.167129	0.473441	0.882457	0.635961	1.22449	5.35075	9	0.802723	0.0101219	0.497424	0.92
12	Tumor necrosis factor levels	ebi-a-GCST90027164	Amyotrophic lateral sclerosis || id:ebi-a-GCST90027164	90274839	Weighted median	11	-0.0103999	0.0736431	0.887696	0.989654	0.856637	1.14332	5.35075	9	0.802723	0.0101219	0.497424	0.92
13	Tumor necrosis factor levels	ebi-a-GCST90027164	Amyotrophic lateral sclerosis || id:ebi-a-GCST90027164	90274839	Inverse variance weighted	11	-0.0134651	0.0550377	0.806726	0.986625	0.885734	1.09901	5.35075	9	0.802723	0.0101219	0.497424	0.92
14	Tumor necrosis factor levels	ebi-a-GCST90027164	Amyotrophic lateral sclerosis || id:ebi-a-GCST90027164	90274839	Simple mode	11	-0.00195096	0.115472	0.986852	0.998051	0.795905	1.25154	5.35075	9	0.802723	0.0101219	0.497424	0.92
15	Tumor necrosis factor levels	ebi-a-GCST90027164	Amyotrophic lateral sclerosis || id:ebi-a-GCST90027164	90274839	Weighted mode	11	-0.00668722	0.103558	0.949786	0.993335	0.810858	1.21688	5.35075	9	0.802723	0.0101219	0.497424	0.92
16	Tumor necrosis factor levels	ebi-a-GCST90027164	Amyotrophic lateral sclerosis || id:ebi-a-GCST90027164	90274836	MR Egger	18	0.212614	0.0883	0.0284703	1.23691	1.04034	1.47062	21.9497	16	0.144824	-0.0221036	0.0394686	0.198
17	Sulfotransferase 1A1 levels	ebi-a-GCST90027164	Amyotrophic lateral sclerosis || id:ebi-a-GCST90027164	90274836	Weighted median	18	0.0733802	0.0537	0.171787	1.07614	0.968631	1.19558	21.9497	16	0.144824	-0.0221036	0.0394686	0.198
18	Sulfotransferase 1A1 levels	ebi-a-GCST90027164	Amyotrophic lateral sclerosis || id:ebi-a-GCST90027164	90274836	Inverse variance weighted	18	0.033257	0.0415889	0.423908	1.03382	0.952889	1.12162	21.9497	16	0.144824	-0.0221036	0.0394686	0.198
19	Sulfotransferase 1A1 levels	ebi-a-GCST90027164	Amyotrophic lateral sclerosis || id:ebi-a-GCST90027164	90274836	Simple mode	18	-0.0917289	0.11475	0.435097	0.912352	0.728594	1.14246	21.9497	16	0.144824	-0.0221036	0.0394686	0.198
20	Sulfotransferase 1A1 levels	ebi-a-GCST90027164	Amyotrophic lateral sclerosis || id:ebi-a-GCST90027164	90274836	Weighted mode	18	0.106711	0.0544162	0.0664714	1.11261	1.00005	1.23784	21.9497	16	0.144824	-0.0221036	0.0394686	0.198
21	Sulfotransferase 1A1 levels	ebi-a-GCST90027164	Amyotrophic lateral sclerosis || id:ebi-a-GCST90027164	90274770	MR Egger	17	0.000843786	0.0352299	0.981208	1.00084	0.934067	1.0724	15.3095	15	0.429362	-0.00391132	0.582011	0.099
22	C-C motif chemokine 4 levels	ebi-a-GCST90027164	Amyotrophic lateral sclerosis || id:ebi-a-GCST90027164	90274770	Weighted median	17	0.0176117	0.029913	0.556019	1.01777	0.959812	1.07922	15.3095	15	0.429362	-0.00391132	0.582011	0.099
23	C-C motif chemokine 4 levels	ebi-a-GCST90027164	Amyotrophic lateral sclerosis || id:ebi-a-GCST90027164	90274770	Inverse variance weighted	17	-0.0139436	0.0232208	0.548187	0.986153	0.942277	1.03207	15.3095	15	0.429362	-0.00391132	0.582011	0.099
24	C-C motif chemokine 4 levels	ebi-a-GCST90027164	Amyotrophic lateral sclerosis || id:ebi-a-GCST90027164	90274770	Simple mode	17	0.0332536	0.0598533	0.58618	1.03381	0.919377	1.16249	15.3095	15	0.429362	-0.00391132	0.582011	0.099
25	C-C motif chemokine 4 levels	ebi-a-GCST90027164	Amyotrophic lateral sclerosis || id:ebi-a-GCST90027164	90274770	Weighted mode	17	0.0109587	0.0284936	0.705595	1.01102	0.956104	1.06909	15.3095	15	0.429362	-0.00391132	0.582011	0.099
26	C-C motif chemokine 4 levels	ebi-a-GCST90027164	Amyotrophic lateral sclerosis || id:ebi-a-GCST90027164	90274800	MR Egger	17	0.0355535	0.0435799	0.427367	1.03619	0.95136	1.12859	21.2675	15	0.128498	-0.00643488	0.416745	0.801
27	Interleukin-15 receptor subunit alpha levels	ebi-a-GCST90027164	Amyotrophic lateral sclerosis || id:ebi-a-GCST90027164	90274800	Weighted median	17	0.0222694	0.0258802	0.389524	1.02252	0.971945	1.07572	21.2675	15	0.128498	-0.00643488	0.416745	0.801
28	Interleukin-15 receptor subunit alpha levels	ebi-a-GCST90027164	Amyotrophic lateral sclerosis || id:ebi-a-GCST90027164	90274800	Inverse variance weighted	17	0.00587656	0.0249881	0.814073	1.00589	0.957816	1.05639	21.2675	15	0.128498	-0.00643488	0.416745	0.801
29	Interleukin-15 receptor subunit alpha levels	ebi-a-GCST90027164	Amyotrophic lateral sclerosis || id:ebi-a-GCST90027164	90274800	Simple mode	17	0.0317716	0.0485699	0.522313	1.03228	0.938544	1.13538	21.2675	15	0.128498	-0.00643488	0.416745	0.801
30	Interleukin-15 receptor subunit alpha levels	ebi-a-GCST90027164	Amyotrophic lateral sclerosis || id:ebi-a-GCST90027164	90274800	Weighted mode	17	0.0224265	0.0236325	0.356751	1.02268	0.97639	1.07116	21.2675	15	0.128498	-0.00643488	0.416745	0.801
31	Interleukin-15 receptor subunit alpha levels	ebi-a-GCST90027164	Amyotrophic lateral sclerosis || id:ebi-a-GCST90027164	90274758	MR Egger	10	-0.182899	0.127539	0.18946	0.832852	0.648641	1.06938	6.77324	8	0.561284	0.0193319	0.140996	0.514
32	Eukaryotic translation initiation factor 4E-binding protein 1 levels	ebi-a-GCST90027164	Amyotrophic lateral sclerosis || id:ebi-a-GCST90027164	90274758	Weighted median	10	-0.0111335	0.0671758	0.868365	0.988928	0.866929	1.1281	6.77324	8	0.561284	0.0193319	0.140996	0.514
33	Eukaryotic translation initiation factor 4E-binding protein 1 levels	ebi-a-GCST90027164	Amyotrophic lateral sclerosis || id:ebi-a-GCST90027164	90274758	Inverse variance weighted	10	0.00733093	0.0532707	0.890543	1.00736	0.907484	1.11822	6.77324	8	0.561284	0.0193319	0.140996	0.514
34	Eukaryotic translation initiation factor 4E-binding protein 1 levels	ebi-a-GCST90027164	Amyotrophic lateral sclerosis || id:ebi-a-GCST90027164	90274758	Simple mode	10	0.0140648	0.108058	0.899303	1.01416	0.820592	1.2534	6.77324	8	0.561284	0.0193319	0.140996	0.514
35	Eukaryotic translation initiation factor 4E-binding protein 1 levels	ebi-a-GCST90027164	Amyotrophic lateral sclerosis || id:ebi-a-GCST90027164	90274758	Weighted mode	10	-0.030355	0.0814266	0.717933	0.970101	0.826999	1.13796	6.77324	8	0.561284	0.0193319	0.140996	0.514
36	Eukaryotic translation initiation factor 4E-binding protein 1 levels	ebi-a-GCST90027164	Amyotrophic lateral sclerosis || id:ebi-a-GCST90027164	90274803	MR Egger	22	-0.041101	0.0710166	0.569217	0.959732	0.835025	1.10306	21.2183	20	0.384385	0.00901581	0.307894	0.713
37	Interleukin-18 levels	ebi-a-GCST90027164	Amyotrophic lateral sclerosis || id:ebi-a-GCST90027164	90274803	Weighted median	22	0.0317655	0.0435815	0.466077	1.03228	0.94776	1.12433	21.2183	20	0.384385	0.00901581	0.307894	0.713
38	Interleukin-18 levels	ebi-a-GCST90027164	Amyotrophic lateral sclerosis || id:ebi-a-GCST90027164	90274803	Inverse variance weighted	22	0.0247989	0.0328849	0.450782	1.02511	0.96112	1.09336	21.2183	20	0.384385	0.00901581	0.307894	0.713
39	Interleukin-18 levels	ebi-a-GCST90027164	Amyotrophic lateral sclerosis || id:ebi-a-GCST90027164	90274803	Simple mode	22	0.038189	0.0889563	0.672076	1.03893	0.872698	1.23682	21.2183	20	0.384385	0.00901581	0.307894	0.713
40	Interleukin-18 levels	ebi-a-GCST90027164	Amyotrophic lateral sclerosis || id:ebi-a-GCST90027164	90274803	Weighted mode	22	0.00520062	0.0425892	0.903972	1.00521	0.924711	1.09273	21.2183	20	0.384385	0.00901581	0.307894	0.713
41	Interleukin-18 levels	ebi-a-GCST90027164	Amyotrophic lateral sclerosis || id:ebi-a-GCST90027164	90274762	MR Egger	19	-0.0177469	0.125952	0.889603	0.98241	0.767503	1.25749	13.6959	17	0.688499	0.00195292	0.852257	0.725
42	beta-nerve growth factor levels	ebi-a-GCST90027164	Amyotrophic lateral sclerosis || id:ebi-a-GCST90027164	90274762	Weighted median	19	-0.0158056	0.0606231	0.79431	0.984319	0.874042	1.10851	13.6959	17	0.688499	0.00195292	0.852257	0.725
43	beta-nerve growth factor levels	ebi-a-GCST90027164	Amyotrophic lateral sclerosis || id:ebi-a-GCST90027164	90274762	Inverse variance weighted	19	0.00449852	0.0449942	0.92036	1.00451	0.919716	1.09712	13.6959	17	0.688499	0.00195292	0.852257	0.725
44	beta-nerve growth factor levels	ebi-a-GCST90027164	Amyotrophic lateral sclerosis || id:ebi-a-GCST90027164	90274762	Simple mode	19	0.0424795	0.10866	0.700431	1.04339	0.843248	1.29105	13.6959	17	0.688499	0.00195292	0.852257	0.725
45	beta-nerve growth factor levels	ebi-a-GCST90027164	Amyotrophic lateral sclerosis || id:ebi-a-GCST90027164	90274762	Weighted mode	19	0.00275501	0.0955393	0.977312	1.00276	0.831518	1.20926	13.6959	17	0.688499	0.00195292	0.852257	0.725
46	beta-nerve growth factor levels	ebi-a-GCST90027164	Amyotrophic lateral sclerosis || id:ebi-a-GCST90027164	90274811	MR Egger	9	0.116817	0.15281	0.469575	1.12391	0.833026	1.51638	6.61382	7	0.470164	-0.0151066	0.302768	0.188
47	Interleukin-2 receptor subunit beta levels	ebi-a-GCST90027164	Amyotrophic lateral sclerosis || id:ebi-a-GCST90027164	90274811	Weighted median	9	0.0476305	0.0793686	0.548427	1.04878	0.897689	1.22531	6.61382	7	0.470164	-0.0151066	0.302768	0.188
48	Interleukin-2 receptor subunit beta levels	ebi-a-GCST90027164	Amyotrophic lateral sclerosis || id:ebi-a-GCST90027164	90274811	Inverse variance weighted	9	-0.0388395	0.0613619	0.526761	0.961905	0.852903	1.08484	6.61382	7	0.470164	-0.0151066	0.302768	0.188
49	Interleukin-2 receptor subunit beta levels	ebi-a-GCST90027164	Amyotrophic lateral sclerosis || id:ebi-a-GCST90027164	90274811	Simple mode	9	0.0727708	0.120413	0.562359	1.07548	0.849388	1.36176	6.61382	7	0.470164	-0.0151066	0.302768	0.188
50	Interleukin-2 receptor subunit beta levels	ebi-a-GCST90027164	Amyotrophic lateral sclerosis || id:ebi-a-GCST90027164	90274811	Weighted mode	9	0.068003	0.112706	0.562976	1.07037	0.858215	1.33497	6.61382	7	0.470164	-0.0151066	0.302768	0.188
51	Interleukin-2 receptor subunit beta levels	ebi-a-GCST90027164	Amyotrophic lateral sclerosis || id:ebi-a-GCST90027164	90274766	MR Egger	16	-0.104489	0.118251	0.391825	0.900785	0.714436	1.13574	14.1895	14	0.435687	0.00607805	0.610161	0.103
52	C-C motif chemokine 20 levels	ebi-a-GCST90027164	Amyotrophic lateral sclerosis || id:ebi-a-GCST90027164	90274766	Weighted median	16	-0.0624988	0.0634848	0.324885	0.939414	0.829503	1.06389	14.1895	14	0.435687	0.00607805	0.610161	0.103
53	C-C motif chemokine 20 levels	ebi-a-GCST90027164	Amyotrophic lateral sclerosis || id:ebi-a-GCST90027164	90274766	Inverse variance weighted	16	-0.0475328	0.0450382	0.291248	0.953579	0.873011	1.04158	14.1895	14	0.435687	0.00607805	0.610161	0.103
54	C-C motif chemokine 20 levels	ebi-a-GCST90027164	Amyotrophic lateral sclerosis || id:ebi-a-GCST90027164	90274766	Simple mode	16	-0.0865318	0.117712	0.473609	0.917106	0.72815	1.1551	14.1895	14	0.435687	0.00607805	0.610161	0.103
55	C-C motif chemokine 20 levels	ebi-a-GCST90027164	Amyotrophic lateral sclerosis || id:ebi-a-GCST90027164	90274766	Weighted mode	16	-0.0649359	0.117117	0.587442	0.937128	0.744915	1.17894	14.1895	14	0.435687	0.00607805	0.610161	0.103
56	C-C motif chemokine 20 levels	ebi-a-GCST90027164	Amyotrophic lateral sclerosis || id:ebi-a-GCST90027164	90274782	MR Egger	11	0.0349875	0.0424266	0.430878	1.03561	0.952973	1.12541	5.99735	9	0.740184	0.00232316	0.716474	0.57
57	C-X-C motif chemokine 5 levels	ebi-a-GCST90027164	Amyotrophic lateral sclerosis || id:ebi-a-GCST90027164	90274782	Weighted median	11	0.0353455	0.0337275	0.294651	1.03598	0.969708	1.10678	5.99735	9	0.740184	0.00232316	0.716474	0.57
58	C-X-C motif chemokine 5 levels	ebi-a-GCST90027164	Amyotrophic lateral sclerosis || id:ebi-a-GCST90027164	90274782	Inverse variance weighted	11	0.0466425	0.0288639	0.106106	1.04775	0.990118	1.10873	5.99735	9	0.740184	0.00232316	0.716474	0.57
59	C-X-C motif chemokine 5 levels	ebi-a-GCST90027164	Amyotrophic lateral sclerosis || id:ebi-a-GCST90027164	90274782	Simple mode	11	0.0868492	0.0724299	0.258138	1.09073	0.946378	1.25711	5.99735	9	0.740184	0.00232316	0.716474	0.57
60	C-X-C motif chemokine 5 levels	ebi-a-GCST90027164	Amyotrophic lateral sclerosis || id:ebi-a-GCST90027164	90274782	Weighted mode	11	0.0348133	0.0362224	0.359165	1.03543	0.964464	1.11161	5.99735	9	0.740184	0.00232316	0.716474	0.57
61	C-X-C motif chemokine 5 levels	ebi-a-GCST90027164	Amyotrophic lateral sclerosis || id:ebi-a-GCST90027164	90274807	MR Egger	12	0.177018	0.11638	0.159221	1.19365	0.950196	1.49949	13.4737	10	0.19838	-0.0366086	0.0325681	0.005
62	Interleukin-20 levels	ebi-a-GCST90027164	Amyotrophic lateral sclerosis || id:ebi-a-GCST90027164	90274807	Weighted median	12	-0.0407444	0.0769886	0.596648	0.960075	0.825602	1.11645	13.4737	10	0.19838	-0.0366086	0.0325681	0.005
63	Interleukin-20 levels	ebi-a-GCST90027164	Amyotrophic lateral sclerosis || id:ebi-a-GCST90027164	90274807	Inverse variance weighted	12	-0.0696368	0.0731886	0.341366	0.932733	0.808086	1.07661	13.4737	10	0.19838	-0.0366086	0.0325681	0.005
64	Interleukin-20 levels	ebi-a-GCST90027164	Amyotrophic lateral sclerosis || id:ebi-a-GCST90027164	90274807	Simple mode	12	-0.0582889	0.127887	0.657412	0.943377	0.734219	1.21212	13.4737	10	0.19838	-0.0366086	0.0325681	0.005
65	Interleukin-20 levels	ebi-a-GCST90027164	Amyotrophic lateral sclerosis || id:ebi-a-GCST90027164	90274807	Weighted mode	12	-0.0551754	0.109119	0.623085	0.946319	0.764106	1.17198	13.4737	10	0.19838	-0.0366086	0.0325681	0.005
66	Interleukin-20 levels	ebi-a-GCST90027164	Amyotrophic lateral sclerosis || id:ebi-a-GCST90027164	90274779	MR Egger	9	-0.00503808	0.0577117	0.93288	0.994975	0.88856	1.11413	7.86155	7	0.34496	0.00200324	0.797343	0.027
67	C-X-C motif chemokine 1 levels	ebi-a-GCST90027164	Amyotrophic lateral sclerosis || id:ebi-a-GCST90027164	90274779	Weighted median	9	-0.000133355	0.0402807	0.997358	0.999867	0.923963	1.08201	7.86155	7	0.34496	0.00200324	0.797343	0.027
68	C-X-C motif chemokine 1 levels	ebi-a-GCST90027164	Amyotrophic lateral sclerosis || id:ebi-a-GCST90027164	90274779	Inverse variance weighted	9	0.006583	0.0357181	0.853775	1.0066	0.938545	1.0796	7.86155	7	0.34496	0.00200324	0.797343	0.027
69	C-X-C motif chemokine 1 levels	ebi-a-GCST90027164	Amyotrophic lateral sclerosis || id:ebi-a-GCST90027164	90274779	Simple mode	9	0.0145836	0.0905555	0.87605	1.01469	0.849672	1.21176	7.86155	7	0.34496	0.00200324	0.797343	0.027
70	C-X-C motif chemokine 1 levels	ebi-a-GCST90027164	Amyotrophic lateral sclerosis || id:ebi-a-GCST90027164	90274779	Weighted mode	9	0.000358735	0.0390803	0.992901	1.00036	0.926595	1.07999	7.86155	7	0.34496	0.00200324	0.797343	0.027
71	C-X-C motif chemokine 1 levels	ebi-a-GCST90027164	Amyotrophic lateral sclerosis || id:ebi-a-GCST90027164	90274841	MR Egger	22	0.124476	0.090814	0.185665	1.13255	0.947888	1.3532	21.0478	20	0.394323	-0.0165485	0.0825308	0.004
72	Tumor necrosis factor receptor superfamily member 9 levels	ebi-a-GCST90027164	Amyotrophic lateral sclerosis || id:ebi-a-GCST90027164	90274841	Weighted median	22	0.0176022	0.0510911	0.73045	1.01776	0.920778	1.12495	21.0478	20	0.394323	-0.0165485	0.0825308	0.004
73	Tumor necrosis factor receptor superfamily member 9 levels	ebi-a-GCST90027164	Amyotrophic lateral sclerosis || id:ebi-a-GCST90027164	90274841	Inverse variance weighted	22	-0.0277735	0.0381463	0.466566	0.972609	0.902542	1.04811	21.0478	20	0.394323	-0.0165485	0.0825308	0.004
74	Tumor necrosis factor receptor superfamily member 9 levels	ebi-a-GCST90027164	Amyotrophic lateral sclerosis || id:ebi-a-GCST90027164	90274841	Simple mode	22	0.0245705	0.0855268	0.776711	1.02487	0.8667	1.21192	21.0478	20	0.394323	-0.0165485	0.0825308	0.004
75	Tumor necrosis factor receptor superfamily member 9 levels	ebi-a-GCST90027164	Amyotrophic lateral sclerosis || id:ebi-a-GCST90027164	90274841	Weighted mode	22	0.0303693	0.0828931	0.717756	1.03084	0.876252	1.21269	21.0478	20	0.394323	-0.0165485	0.0825308	0.004
76	Tumor necrosis factor receptor superfamily member 9 levels	ebi-a-GCST90027164	Amyotrophic lateral sclerosis || id:ebi-a-GCST90027164	90274843	MR Egger	22	-0.0228385	0.0414686	0.58791	0.97742	0.90112	1.06018	22.2949	20	0.324728	0.0106829	0.106418	0.329
77	TNF-related apoptosis-inducing ligand levels	ebi-a-GCST90027164	Amyotrophic lateral sclerosis || id:ebi-a-GCST90027164	90274843	Weighted median	22	0.0504977	0.0386042	0.190843	1.05179	0.975148	1.13447	22.2949	20	0.324728	0.0106829	0.106418	0.329
78	TNF-related apoptosis-inducing ligand levels	ebi-a-GCST90027164	Amyotrophic lateral sclerosis || id:ebi-a-GCST90027164	90274843	Inverse variance weighted	22	0.0313244	0.0274723	0.254196	1.03182	0.97773	1.0889	22.2949	20	0.324728	0.0106829	0.106418	0.329
79	TNF-related apoptosis-inducing ligand levels	ebi-a-GCST90027164	Amyotrophic lateral sclerosis || id:ebi-a-GCST90027164	90274843	Simple mode	22	0.09039	0.0708937	0.216233	1.0946	0.952598	1.25777	22.2949	20	0.324728	0.0106829	0.106418	0.329
80	TNF-related apoptosis-inducing ligand levels	ebi-a-GCST90027164	Amyotrophic lateral sclerosis || id:ebi-a-GCST90027164	90274843	Weighted mode	22	0.0595396	0.046898	0.218133	1.06135	0.968138	1.16353	22.2949	20	0.324728	0.0106829	0.106418	0.329
81	TNF-related apoptosis-inducing ligand levels	ebi-a-GCST90027164	Amyotrophic lateral sclerosis || id:ebi-a-GCST90027164	90274773	MR Egger	21	-0.0983431	0.134396	0.473255	0.906338	0.696451	1.17948	38.583	19	0.00499887	0.0099704	0.440813	0.359
82	T-cell surface glycoprotein CD5 levels	ebi-a-GCST90027164	Amyotrophic lateral sclerosis || id:ebi-a-GCST90027164	90274773	Weighted median	21	-0.0640716	0.0525604	0.222841	0.937938	0.846123	1.03972	38.583	19	0.00499887	0.0099704	0.440813	0.359
83	T-cell surface glycoprotein CD5 levels	ebi-a-GCST90027164	Amyotrophic lateral sclerosis || id:ebi-a-GCST90027164	90274773	Inverse variance weighted	21	-0.000525809	0.0507547	0.991734	0.999474	0.904833	1.10401	38.583	19	0.00499887	0.0099704	0.440813	0.359
84	T-cell surface glycoprotein CD5 levels	ebi-a-GCST90027164	Amyotrophic lateral sclerosis || id:ebi-a-GCST90027164	90274773	Simple mode	21	-0.0807205	0.0810726	0.331312	0.922452	0.786925	1.08132	38.583	19	0.00499887	0.0099704	0.440813	0.359
85	T-cell surface glycoprotein CD5 levels	ebi-a-GCST90027164	Amyotrophic lateral sclerosis || id:ebi-a-GCST90027164	90274773	Weighted mode	21	-0.0807205	0.066357	0.237973	0.922452	0.809952	1.05058	38.583	19	0.00499887	0.0099704	0.440813	0.359
86	T-cell surface glycoprotein CD5 levels	ebi-a-GCST90027164	Amyotrophic lateral sclerosis || id:ebi-a-GCST90027164	90274835	MR Egger	22	0.0597739	0.0972364	0.545665	1.0616	0.877385	1.28448	27.9702	20	0.110106	-0.00514719	0.55389	0.166
87	Signaling lymphocytic activation molecule levels	ebi-a-GCST90027164	Amyotrophic lateral sclerosis || id:ebi-a-GCST90027164	90274835	Weighted median	22	0.0442609	0.0495832	0.372039	1.04526	0.948454	1.15194	27.9702	20	0.110106	-0.00514719	0.55389	0.166
88	Signaling lymphocytic activation molecule levels	ebi-a-GCST90027164	Amyotrophic lateral sclerosis || id:ebi-a-GCST90027164	90274835	Inverse variance weighted	22	0.00648076	0.0396314	0.870104	1.0065	0.931279	1.0878	27.9702	20	0.110106	-0.00514719	0.55389	0.166
89	Signaling lymphocytic activation molecule levels	ebi-a-GCST90027164	Amyotrophic lateral sclerosis || id:ebi-a-GCST90027164	90274835	Simple mode	22	0.10816	0.0810253	0.196205	1.11423	0.950612	1.306	27.9702	20	0.110106	-0.00514719	0.55389	0.166
90	Signaling lymphocytic activation molecule levels	ebi-a-GCST90027164	Amyotrophic lateral sclerosis || id:ebi-a-GCST90027164	90274835	Weighted mode	22	0.0659848	0.0582803	0.270315	1.06821	0.952901	1.19747	27.9702	20	0.110106	-0.00514719	0.55389	0.166
91	Signaling lymphocytic activation molecule levels	ebi-a-GCST90027164	Amyotrophic lateral sclerosis || id:ebi-a-GCST90027164	90274792	MR Egger	20	-0.11295	0.0502428	0.037338	0.893195	0.809429	0.98563	18.1341	18	0.446849	0.0158819	0.0408061	0.168
92	Glial cell line-derived neurotrophic factor levels	ebi-a-GCST90027164	Amyotrophic lateral sclerosis || id:ebi-a-GCST90027164	90274792	Weighted median	20	-0.103993	0.0443928	0.0191521	0.901232	0.82613	0.983161	18.1341	18	0.446849	0.0158819	0.0408061	0.168
93	Glial cell line-derived neurotrophic factor levels	ebi-a-GCST90027164	Amyotrophic lateral sclerosis || id:ebi-a-GCST90027164	90274792	Inverse variance weighted	20	-0.0240874	0.0328726	0.46371	0.9762	0.915287	1.04117	18.1341	18	0.446849	0.0158819	0.0408061	0.168
94	Glial cell line-derived neurotrophic factor levels	ebi-a-GCST90027164	Amyotrophic lateral sclerosis || id:ebi-a-GCST90027164	90274792	Simple mode	20	0.0507103	0.0957197	0.602401	1.05202	0.872057	1.26912	18.1341	18	0.446849	0.0158819	0.0408061	0.168
95	Glial cell line-derived neurotrophic factor levels	ebi-a-GCST90027164	Amyotrophic lateral sclerosis || id:ebi-a-GCST90027164	90274792	Weighted mode	20	-0.107318	0.0420226	0.0194015	0.89824	0.827222	0.975355	18.1341	18	0.446849	0.0158819	0.0408061	0.168
96	Glial cell line-derived neurotrophic factor levels	ebi-a-GCST90027164	Amyotrophic lateral sclerosis || id:ebi-a-GCST90027164	90274837	MR Egger	9	-0.230015	0.257238	0.400927	0.794522	0.479889	1.31544	14.386	7	0.0447265	0.0292143	0.391483	0.59
97	STAM binding protein levels	ebi-a-GCST90027164	Amyotrophic lateral sclerosis || id:ebi-a-GCST90027164	90274837	Weighted median	9	0.0251052	0.0975777	0.796959	1.02542	0.846922	1.24155	14.386	7	0.0447265	0.0292143	0.391483	0.59
98	STAM binding protein levels	ebi-a-GCST90027164	Amyotrophic lateral sclerosis || id:ebi-a-GCST90027164	90274837	Inverse variance weighted	9	-0.0124762	0.0960947	0.896699	0.987601	0.818058	1.19228	14.386	7	0.0447265	0.0292143	0.391483	0.59
99	STAM binding protein levels	ebi-a-GCST90027164	Amyotrophic lateral sclerosis || id:ebi-a-GCST90027164	90274837	Simple mode	9	0.0274079	0.149477	0.859078	1.02779	0.766772	1.37765	14.386	7	0.0447265	0.0292143	0.391483	0.59
100	STAM binding protein levels	ebi-a-GCST90027164	Amyotrophic lateral sclerosis || id:ebi-a-GCST90027164	90274837	Weighted mode	9	0.0243002	0.132758	0.85932	1.0246	0.789855	1.32911	14.386	7	0.0447265	0.0292143	0.391483	0.59
101	STAM binding protein levels	ebi-a-GCST90027164	Amyotrophic lateral sclerosis || id:ebi-a-GCST90027164	90274767	MR Egger	25	0.0278543	0.0286556	0.341145	1.02825	0.972086	1.08765	18.0742	23	0.753454	-0.00206381	0.690787	0.04
102	C-C motif chemokine 23 levels	ebi-a-GCST90027164	Amyotrophic lateral sclerosis || id:ebi-a-GCST90027164	90274767	Weighted median	25	0.00252163	0.0274972	0.926933	1.00252	0.949924	1.05804	18.0742	23	0.753454	-0.00206381	0.690787	0.04
103	C-C motif chemokine 23 levels	ebi-a-GCST90027164	Amyotrophic lateral sclerosis || id:ebi-a-GCST90027164	90274767	Inverse variance weighted	25	0.0198989	0.020764	0.337894	1.0201	0.979416	1.06247	18.0742	23	0.753454	-0.00206381	0.690787	0.04
104	C-C motif chemokine 23 levels	ebi-a-GCST90027164	Amyotrophic lateral sclerosis || id:ebi-a-GCST90027164	90274767	Simple mode	25	0.0228043	0.0551864	0.683112	1.02307	0.918181	1.13993	18.0742	23	0.753454	-0.00206381	0.690787	0.04
105	C-C motif chemokine 23 levels	ebi-a-GCST90027164	Amyotrophic lateral sclerosis || id:ebi-a-GCST90027164	90274767	Weighted mode	25	0.0126406	0.0230917	0.589153	1.01272	0.967907	1.05961	18.0742	23	0.753454	-0.00206381	0.690787	0.04
106	C-C motif chemokine 23 levels	ebi-a-GCST90027164	Amyotrophic lateral sclerosis || id:ebi-a-GCST90027164	90274812	MR Egger	9	0.132705	0.165813	0.449822	1.14191	0.82507	1.58043	6.00474	7	0.539195	-0.0112918	0.48255	0.036
107	Interleukin-33 levels	ebi-a-GCST90027164	Amyotrophic lateral sclerosis || id:ebi-a-GCST90027164	90274812	Weighted median	9	0.0722927	0.0800313	0.366364	1.07497	0.918908	1.25754	6.00474	7	0.539195	-0.0112918	0.48255	0.036
108	Interleukin-33 levels	ebi-a-GCST90027164	Amyotrophic lateral sclerosis || id:ebi-a-GCST90027164	90274812	Inverse variance weighted	9	0.0180537	0.0598561	0.762943	1.01822	0.905503	1.14496	6.00474	7	0.539195	-0.0112918	0.48255	0.036
109	Interleukin-33 levels	ebi-a-GCST90027164	Amyotrophic lateral sclerosis || id:ebi-a-GCST90027164	90274812	Simple mode	9	0.112594	0.139591	0.443214	1.11918	0.851288	1.47137	6.00474	7	0.539195	-0.0112918	0.48255	0.036
110	Interleukin-33 levels	ebi-a-GCST90027164	Amyotrophic lateral sclerosis || id:ebi-a-GCST90027164	90274812	Weighted mode	9	0.114572	0.133462	0.415616	1.12139	0.863282	1.45668	6.00474	7	0.539195	-0.0112918	0.48255	0.036
111	Interleukin-33 levels	ebi-a-GCST90027164	Amyotrophic lateral sclerosis || id:ebi-a-GCST90027164	90274810	MR Egger	8	0.0826623	0.140606	0.578039	1.08617	0.824544	1.43082	8.35992	6	0.212903	-0.00890777	0.623423	0.07
112	Interleukin-24 levels	ebi-a-GCST90027164	Amyotrophic lateral sclerosis || id:ebi-a-GCST90027164	90274810	Weighted median	8	0.0740478	0.0806409	0.358493	1.07686	0.919424	1.26125	8.35992	6	0.212903	-0.00890777	0.623423	0.07
113	Interleukin-24 levels	ebi-a-GCST90027164	Amyotrophic lateral sclerosis || id:ebi-a-GCST90027164	90274810	Inverse variance weighted	8	0.0204797	0.0690391	0.766742	1.02069	0.891512	1.16859	8.35992	6	0.212903	-0.00890777	0.623423	0.07
114	Interleukin-24 levels	ebi-a-GCST90027164	Amyotrophic lateral sclerosis || id:ebi-a-GCST90027164	90274810	Simple mode	8	0.126659	0.127786	0.354612	1.13503	0.883556	1.45808	8.35992	6	0.212903	-0.00890777	0.623423	0.07
115	Interleukin-24 levels	ebi-a-GCST90027164	Amyotrophic lateral sclerosis || id:ebi-a-GCST90027164	90274810	Weighted mode	8	0.120286	0.110052	0.310577	1.12782	0.908995	1.39932	8.35992	6	0.212903	-0.00890777	0.623423	0.07
116	Interleukin-24 levels	ebi-a-GCST90027164	Amyotrophic lateral sclerosis || id:ebi-a-GCST90027164	90274761	MR Egger	8	0.0150875	0.145355	0.920713	1.0152	0.763526	1.34984	4.75792	6	0.575216	-0.00969878	0.522369	0.262
117	Axin-1 levels	ebi-a-GCST90027164	Amyotrophic lateral sclerosis || id:ebi-a-GCST90027164	90274761	Weighted median	8	-0.0454929	0.0794433	0.566884	0.955526	0.817747	1.11652	4.75792	6	0.575216	-0.00969878	0.522369	0.262
118	Axin-1 levels	ebi-a-GCST90027164	Amyotrophic lateral sclerosis || id:ebi-a-GCST90027164	90274761	Inverse variance weighted	8	-0.0748927	0.0597843	0.210309	0.927843	0.825249	1.04319	4.75792	6	0.575216	-0.00969878	0.522369	0.262
119	Axin-1 levels	ebi-a-GCST90027164	Amyotrophic lateral sclerosis || id:ebi-a-GCST90027164	90274761	Simple mode	8	-0.0479149	0.114972	0.689341	0.953215	0.760895	1.19414	4.75792	6	0.575216	-0.00969878	0.522369	0.262
120	Axin-1 levels	ebi-a-GCST90027164	Amyotrophic lateral sclerosis || id:ebi-a-GCST90027164	90274761	Weighted mode	8	-0.0454141	0.101388	0.667743	0.955602	0.783382	1.16568	4.75792	6	0.575216	-0.00969878	0.522369	0.262
121	Axin-1 levels	ebi-a-GCST90027164	Amyotrophic lateral sclerosis || id:ebi-a-GCST90027164	90274771	MR Egger	19	0.0631263	0.0706367	0.383973	1.06516	0.927445	1.22333	10.9909	17	0.857039	-0.0015142	0.829145	0.244
122	Natural killer cell receptor 2B4 levels	ebi-a-GCST90027164	Amyotrophic lateral sclerosis || id:ebi-a-GCST90027164	90274771	Weighted median	19	0.0590011	0.0492479	0.2309	1.06078	0.963171	1.16827	10.9909	17	0.857039	-0.0015142	0.829145	0.244
123	Natural killer cell receptor 2B4 levels	ebi-a-GCST90027164	Amyotrophic lateral sclerosis || id:ebi-a-GCST90027164	90274771	Inverse variance weighted	19	0.0495088	0.0335903	0.140509	1.05075	0.983804	1.12226	10.9909	17	0.857039	-0.0015142	0.829145	0.244
124	Natural killer cell receptor 2B4 levels	ebi-a-GCST90027164	Amyotrophic lateral sclerosis || id:ebi-a-GCST90027164	90274771	Simple mode	19	0.0488533	0.0818751	0.558151	1.05007	0.894382	1.23285	10.9909	17	0.857039	-0.0015142	0.829145	0.244
125	Natural killer cell receptor 2B4 levels	ebi-a-GCST90027164	Amyotrophic lateral sclerosis || id:ebi-a-GCST90027164	90274771	Weighted mode	19	0.0643551	0.0510058	0.223155	1.06647	0.965011	1.1786	10.9909	17	0.857039	-0.0015142	0.829145	0.244
126	Natural killer cell receptor 2B4 levels	ebi-a-GCST90027164	Amyotrophic lateral sclerosis || id:ebi-a-GCST90027164	90274799	MR Egger	11	0.0200904	0.152085	0.897811	1.02029	0.7573	1.37462	4.17413	9	0.899582	0.00708373	0.587694	<0.001
127	Interleukin-13 levels	ebi-a-GCST90027164	Amyotrophic lateral sclerosis || id:ebi-a-GCST90027164	90274799	Weighted median	11	0.119057	0.0699823	0.0888966	1.12643	0.982055	1.29204	4.17413	9	0.899582	0.00708373	0.587694	<0.001
128	Interleukin-13 levels	ebi-a-GCST90027164	Amyotrophic lateral sclerosis || id:ebi-a-GCST90027164	90274799	Inverse variance weighted	11	0.100125	0.0535241	0.0613924	1.10531	0.995229	1.22757	4.17413	9	0.899582	0.00708373	0.587694	<0.001
129	Interleukin-13 levels	ebi-a-GCST90027164	Amyotrophic lateral sclerosis || id:ebi-a-GCST90027164	90274799	Simple mode	11	0.14716	0.112983	0.221944	1.15854	0.928405	1.44572	4.17413	9	0.899582	0.00708373	0.587694	<0.001
130	Interleukin-13 levels	ebi-a-GCST90027164	Amyotrophic lateral sclerosis || id:ebi-a-GCST90027164	90274799	Weighted mode	11	0.14716	0.106735	0.198034	1.15854	0.939844	1.42812	4.17413	9	0.899582	0.00708373	0.587694	<0.001
131	Interleukin-13 levels	ebi-a-GCST90027164	Amyotrophic lateral sclerosis || id:ebi-a-GCST90027164	90274787	MR Egger	19	0.129993	0.0961976	0.194306	1.13882	0.943127	1.37512	17.5946	17	0.414834	-0.0130758	0.205495	0.148
132	Fibroblast growth factor 19 levels	ebi-a-GCST90027164	Amyotrophic lateral sclerosis || id:ebi-a-GCST90027164	90274787	Weighted median	19	0.0432175	0.0526868	0.412061	1.04416	0.941719	1.15776	17.5946	17	0.414834	-0.0130758	0.205495	0.148
133	Fibroblast growth factor 19 levels	ebi-a-GCST90027164	Amyotrophic lateral sclerosis || id:ebi-a-GCST90027164	90274787	Inverse variance weighted	19	0.0130193	0.037605	0.729184	1.0131	0.941118	1.0906	17.5946	17	0.414834	-0.0130758	0.205495	0.148
134	Fibroblast growth factor 19 levels	ebi-a-GCST90027164	Amyotrophic lateral sclerosis || id:ebi-a-GCST90027164	90274787	Simple mode	19	-0.0982613	0.0935019	0.307209	0.906412	0.754632	1.08872	17.5946	17	0.414834	-0.0130758	0.205495	0.148
135	Fibroblast growth factor 19 levels	ebi-a-GCST90027164	Amyotrophic lateral sclerosis || id:ebi-a-GCST90027164	90274787	Weighted mode	19	0.0481237	0.059161	0.426598	1.0493	0.934418	1.17831	17.5946	17	0.414834	-0.0130758	0.205495	0.148
136	Fibroblast growth factor 19 levels	ebi-a-GCST90027164	Amyotrophic lateral sclerosis || id:ebi-a-GCST90027164	90274844	MR Egger	29	-0.0196055	0.0692828	0.779352	0.980585	0.856073	1.12321	40.6935	27	0.044064	0.00339105	0.669177	0.505
137	TNF-related activation-induced cytokine levels	ebi-a-GCST90027164	Amyotrophic lateral sclerosis || id:ebi-a-GCST90027164	90274844	Weighted median	29	0.0319958	0.0417653	0.443626	1.03251	0.951359	1.12059	40.6935	27	0.044064	0.00339105	0.669177	0.505
138	TNF-related activation-induced cytokine levels	ebi-a-GCST90027164	Amyotrophic lateral sclerosis || id:ebi-a-GCST90027164	90274844	Inverse variance weighted	29	0.00655437	0.0331681	0.84335	1.00658	0.943221	1.07419	40.6935	27	0.044064	0.00339105	0.669177	0.505
139	TNF-related activation-induced cytokine levels	ebi-a-GCST90027164	Amyotrophic lateral sclerosis || id:ebi-a-GCST90027164	90274844	Simple mode	29	0.0454533	0.0728914	0.537953	1.0465	0.907181	1.20722	40.6935	27	0.044064	0.00339105	0.669177	0.505
140	TNF-related activation-induced cytokine levels	ebi-a-GCST90027164	Amyotrophic lateral sclerosis || id:ebi-a-GCST90027164	90274844	Weighted mode	29	0.0483815	0.042914	0.26914	1.04957	0.964901	1.14167	40.6935	27	0.044064	0.00339105	0.669177	0.505
141	TNF-related activation-induced cytokine levels	ebi-a-GCST90027164	Amyotrophic lateral sclerosis || id:ebi-a-GCST90027164	90274840	MR Egger	30	-0.032214	0.0316869	0.318032	0.968299	0.909991	1.03034	34.5181	28	0.184333	-0.00538301	0.454013	0.723
142	TNF-beta levels	ebi-a-GCST90027164	Amyotrophic lateral sclerosis || id:ebi-a-GCST90027164	90274840	Weighted median	30	-0.034514	0.0254539	0.175117	0.966075	0.91906	1.01549	34.5181	28	0.184333	-0.00538301	0.454013	0.723
143	TNF-beta levels	ebi-a-GCST90027164	Amyotrophic lateral sclerosis || id:ebi-a-GCST90027164	90274840	Inverse variance weighted	30	-0.0507038	0.0201268	0.0117617	0.95056	0.913792	0.988808	34.5181	28	0.184333	-0.00538301	0.454013	0.723
144	TNF-beta levels	ebi-a-GCST90027164	Amyotrophic lateral sclerosis || id:ebi-a-GCST90027164	90274840	Simple mode	30	-0.0219576	0.0495378	0.660875	0.978282	0.887762	1.07803	34.5181	28	0.184333	-0.00538301	0.454013	0.723
145	TNF-beta levels	ebi-a-GCST90027164	Amyotrophic lateral sclerosis || id:ebi-a-GCST90027164	90274840	Weighted mode	30	-0.0363098	0.0238299	0.138415	0.964342	0.920336	1.01045	34.5181	28	0.184333	-0.00538301	0.454013	0.723
146	TNF-beta levels	ebi-a-GCST90027164	Amyotrophic lateral sclerosis || id:ebi-a-GCST90027164	90274817	MR Egger	16	-0.0867403	0.091316	0.358278	0.916915	0.766654	1.09663	11.9128	14	0.613303	0.0148822	0.0885716	0.322
147	Interleukin-8 levels	ebi-a-GCST90027164	Amyotrophic lateral sclerosis || id:ebi-a-GCST90027164	90274817	Weighted median	16	0.112024	0.0690378	0.104666	1.11854	0.976979	1.28061	11.9128	14	0.613303	0.0148822	0.0885716	0.322
148	Interleukin-8 levels	ebi-a-GCST90027164	Amyotrophic lateral sclerosis || id:ebi-a-GCST90027164	90274817	Inverse variance weighted	16	0.0569572	0.0470417	0.22598	1.05861	0.965369	1.16086	11.9128	14	0.613303	0.0148822	0.0885716	0.322
149	Interleukin-8 levels	ebi-a-GCST90027164	Amyotrophic lateral sclerosis || id:ebi-a-GCST90027164	90274817	Simple mode	16	0.141747	0.140385	0.328651	1.15228	0.875108	1.51725	11.9128	14	0.613303	0.0148822	0.0885716	0.322
150	Interleukin-8 levels	ebi-a-GCST90027164	Amyotrophic lateral sclerosis || id:ebi-a-GCST90027164	90274817	Weighted mode	16	0.150589	0.136927	0.288767	1.16252	0.888885	1.52039	11.9128	14	0.613303	0.0148822	0.0885716	0.322
151	Interleukin-8 levels	ebi-a-GCST90027164	Amyotrophic lateral sclerosis || id:ebi-a-GCST90027164	90274794	MR Egger	7	-0.0552405	0.294054	0.858374	0.946258	0.531747	1.68389	20.8705	5	0.000857002	0.0114756	0.681658	0.297
152	Interferon gamma levels	ebi-a-GCST90027164	Amyotrophic lateral sclerosis || id:ebi-a-GCST90027164	90274794	Weighted median	7	0.0556385	0.110719	0.615302	1.05722	0.850977	1.31344	20.8705	5	0.000857002	0.0114756	0.681658	0.297
153	Interferon gamma levels	ebi-a-GCST90027164	Amyotrophic lateral sclerosis || id:ebi-a-GCST90027164	90274794	Inverse variance weighted	7	0.0576325	0.12872	0.654344	1.05933	0.823116	1.36332	20.8705	5	0.000857002	0.0114756	0.681658	0.297
154	Interferon gamma levels	ebi-a-GCST90027164	Amyotrophic lateral sclerosis || id:ebi-a-GCST90027164	90274794	Simple mode	7	0.0122902	0.178065	0.947216	1.01237	0.71411	1.43519	20.8705	5	0.000857002	0.0114756	0.681658	0.297
155	Interferon gamma levels	ebi-a-GCST90027164	Amyotrophic lateral sclerosis || id:ebi-a-GCST90027164	90274794	Weighted mode	7	0.0164917	0.162322	0.922385	1.01663	0.73959	1.39744	20.8705	5	0.000857002	0.0114756	0.681658	0.297
156	Interferon gamma levels	ebi-a-GCST90027164	Amyotrophic lateral sclerosis || id:ebi-a-GCST90027164	90274847	MR Egger	22	0.0894604	0.0952371	0.358761	1.09358	0.907371	1.31801	36.8526	20	0.0121872	-0.00672105	0.499299	0.702
157	Urokinase-type plasminogen activator levels	ebi-a-GCST90027164	Amyotrophic lateral sclerosis || id:ebi-a-GCST90027164	90274847	Weighted median	22	-0.0132605	0.0524557	0.800427	0.986827	0.89041	1.09369	36.8526	20	0.0121872	-0.00672105	0.499299	0.702
158	Urokinase-type plasminogen activator levels	ebi-a-GCST90027164	Amyotrophic lateral sclerosis || id:ebi-a-GCST90027164	90274847	Inverse variance weighted	22	0.0308705	0.0421216	0.463626	1.03135	0.949625	1.12011	36.8526	20	0.0121872	-0.00672105	0.499299	0.702
159	Urokinase-type plasminogen activator levels	ebi-a-GCST90027164	Amyotrophic lateral sclerosis || id:ebi-a-GCST90027164	90274847	Simple mode	22	-0.0114336	0.118243	0.923885	0.988631	0.784122	1.24648	36.8526	20	0.0121872	-0.00672105	0.499299	0.702
160	Urokinase-type plasminogen activator levels	ebi-a-GCST90027164	Amyotrophic lateral sclerosis || id:ebi-a-GCST90027164	90274847	Weighted mode	22	-0.0421032	0.126658	0.742871	0.958771	0.747999	1.22893	36.8526	20	0.0121872	-0.00672105	0.499299	0.702
161	Urokinase-type plasminogen activator levels	ebi-a-GCST90027164	Amyotrophic lateral sclerosis || id:ebi-a-GCST90027164	90274778	MR Egger	24	0.029895	0.105592	0.779732	1.03035	0.837726	1.26726	27.1838	22	0.204328	-0.00687073	0.487478	0.127
162	Fractalkine levels	ebi-a-GCST90027164	Amyotrophic lateral sclerosis || id:ebi-a-GCST90027164	90274778	Weighted median	24	-0.0445712	0.0526458	0.397205	0.956408	0.862641	1.06037	27.1838	22	0.204328	-0.00687073	0.487478	0.127
163	Fractalkine levels	ebi-a-GCST90027164	Amyotrophic lateral sclerosis || id:ebi-a-GCST90027164	90274778	Inverse variance weighted	24	-0.0385638	0.0414002	0.351601	0.96217	0.887179	1.0435	27.1838	22	0.204328	-0.00687073	0.487478	0.127
164	Fractalkine levels	ebi-a-GCST90027164	Amyotrophic lateral sclerosis || id:ebi-a-GCST90027164	90274778	Simple mode	24	0.00394893	0.101119	0.969186	1.00396	0.823457	1.22402	27.1838	22	0.204328	-0.00687073	0.487478	0.127
165	Fractalkine levels	ebi-a-GCST90027164	Amyotrophic lateral sclerosis || id:ebi-a-GCST90027164	90274778	Weighted mode	24	-0.0199202	0.095429	0.836486	0.980277	0.813051	1.1819	27.1838	22	0.204328	-0.00687073	0.487478	0.127
166	Fractalkine levels	ebi-a-GCST90027164	Amyotrophic lateral sclerosis || id:ebi-a-GCST90027164	90274783	MR Egger	13	-0.00246076	0.0385042	0.950189	0.997542	0.92503	1.07574	10.3125	11	0.50252	0.00268186	0.727534	0.98
167	C-X-C motif chemokine 6 levels	ebi-a-GCST90027164	Amyotrophic lateral sclerosis || id:ebi-a-GCST90027164	90274783	Weighted median	13	0.0193591	0.0295123	0.511845	1.01955	0.962246	1.08026	10.3125	11	0.50252	0.00268186	0.727534	0.98
168	C-X-C motif chemokine 6 levels	ebi-a-GCST90027164	Amyotrophic lateral sclerosis || id:ebi-a-GCST90027164	90274783	Inverse variance weighted	13	0.00813307	0.0245786	0.740719	1.00817	0.96075	1.05792	10.3125	11	0.50252	0.00268186	0.727534	0.98
169	C-X-C motif chemokine 6 levels	ebi-a-GCST90027164	Amyotrophic lateral sclerosis || id:ebi-a-GCST90027164	90274783	Simple mode	13	0.0929187	0.0672771	0.192416	1.09737	0.961804	1.25205	10.3125	11	0.50252	0.00268186	0.727534	0.98
170	C-X-C motif chemokine 6 levels	ebi-a-GCST90027164	Amyotrophic lateral sclerosis || id:ebi-a-GCST90027164	90274783	Weighted mode	13	0.0234267	0.0290755	0.436081	1.0237	0.966996	1.08374	10.3125	11	0.50252	0.00268186	0.727534	0.98
171	C-X-C motif chemokine 6 levels	ebi-a-GCST90027164	Amyotrophic lateral sclerosis || id:ebi-a-GCST90027164	90274833	MR Egger	33	-0.0191753	0.0510269	0.709634	0.981007	0.887641	1.08419	21.085	31	0.909651	0.000333508	0.951941	0.349
172	Stem cell factor levels	ebi-a-GCST90027164	Amyotrophic lateral sclerosis || id:ebi-a-GCST90027164	90274833	Weighted median	33	-0.0184209	0.0386816	0.633918	0.981748	0.910067	1.05907	21.085	31	0.909651	0.000333508	0.951941	0.349
173	Stem cell factor levels	ebi-a-GCST90027164	Amyotrophic lateral sclerosis || id:ebi-a-GCST90027164	90274833	Inverse variance weighted	33	-0.0164807	0.0252375	0.513741	0.983654	0.936181	1.03353	21.085	31	0.909651	0.000333508	0.951941	0.349
174	Stem cell factor levels	ebi-a-GCST90027164	Amyotrophic lateral sclerosis || id:ebi-a-GCST90027164	90274833	Simple mode	33	0.0426094	0.0744635	0.571172	1.04353	0.901821	1.20751	21.085	31	0.909651	0.000333508	0.951941	0.349
175	Stem cell factor levels	ebi-a-GCST90027164	Amyotrophic lateral sclerosis || id:ebi-a-GCST90027164	90274833	Weighted mode	33	-0.0262431	0.0410835	0.527515	0.974098	0.898735	1.05578	21.085	31	0.909651	0.000333508	0.951941	0.349
176	Stem cell factor levels	ebi-a-GCST90027164	Amyotrophic lateral sclerosis || id:ebi-a-GCST90027164	90274781	MR Egger	21	0.0861591	0.0674117	0.216607	1.08998	0.955073	1.24394	23.9983	19	0.196216	-0.0120769	0.117338	0.242
177	C-X-C motif chemokine 11 levels	ebi-a-GCST90027164	Amyotrophic lateral sclerosis || id:ebi-a-GCST90027164	90274781	Weighted median	21	-0.0342964	0.048868	0.482793	0.966285	0.878027	1.06341	23.9983	19	0.196216	-0.0120769	0.117338	0.242
178	C-X-C motif chemokine 11 levels	ebi-a-GCST90027164	Amyotrophic lateral sclerosis || id:ebi-a-GCST90027164	90274781	Inverse variance weighted	21	-0.00754629	0.037287	0.839616	0.992482	0.922536	1.06773	23.9983	19	0.196216	-0.0120769	0.117338	0.242
179	C-X-C motif chemokine 11 levels	ebi-a-GCST90027164	Amyotrophic lateral sclerosis || id:ebi-a-GCST90027164	90274781	Simple mode	21	0.00164944	0.0844214	0.984605	1.00165	0.848898	1.18189	23.9983	19	0.196216	-0.0120769	0.117338	0.242
180	C-X-C motif chemokine 11 levels	ebi-a-GCST90027164	Amyotrophic lateral sclerosis || id:ebi-a-GCST90027164	90274781	Weighted mode	21	-0.0134799	0.0601377	0.824915	0.986611	0.876911	1.11003	23.9983	19	0.196216	-0.0120769	0.117338	0.242
181	C-X-C motif chemokine 11 levels	ebi-a-GCST90027164	Amyotrophic lateral sclerosis || id:ebi-a-GCST90027164	90274764	MR Egger	20	0.0566624	0.0779825	0.476813	1.0583	0.908297	1.23307	20.562	18	0.302081	-0.00425906	0.642564	0.555
182	Eotaxin levels	ebi-a-GCST90027164	Amyotrophic lateral sclerosis || id:ebi-a-GCST90027164	90274764	Weighted median	20	0.0168051	0.0523257	0.748086	1.01695	0.917821	1.12678	20.562	18	0.302081	-0.00425906	0.642564	0.555
183	Eotaxin levels	ebi-a-GCST90027164	Amyotrophic lateral sclerosis || id:ebi-a-GCST90027164	90274764	Inverse variance weighted	20	0.0240095	0.0352617	0.495938	1.0243	0.955899	1.0976	20.562	18	0.302081	-0.00425906	0.642564	0.555
184	Eotaxin levels	ebi-a-GCST90027164	Amyotrophic lateral sclerosis || id:ebi-a-GCST90027164	90274764	Simple mode	20	-0.0231832	0.091528	0.802764	0.977083	0.816623	1.16907	20.562	18	0.302081	-0.00425906	0.642564	0.555
185	Eotaxin levels	ebi-a-GCST90027164	Amyotrophic lateral sclerosis || id:ebi-a-GCST90027164	90274764	Weighted mode	20	0.00679305	0.0596025	0.910455	1.00682	0.895809	1.13158	20.562	18	0.302081	-0.00425906	0.642564	0.555
186	Eotaxin levels	ebi-a-GCST90027164	Amyotrophic lateral sclerosis || id:ebi-a-GCST90027164	90274759	MR Egger	14	0.0604707	0.0422621	0.177996	1.06234	0.977885	1.15408	29.2245	12	0.00364852	0.00328289	0.734957	0.389
187	Adenosine Deaminase levels	ebi-a-GCST90027164	Amyotrophic lateral sclerosis || id:ebi-a-GCST90027164	90274759	Weighted median	14	0.0754451	0.0281202	0.0072976	1.07836	1.02054	1.13947	29.2245	12	0.00364852	0.00328289	0.734957	0.389
188	Adenosine Deaminase levels	ebi-a-GCST90027164	Amyotrophic lateral sclerosis || id:ebi-a-GCST90027164	90274759	Inverse variance weighted	14	0.0690681	0.0330343	0.0365464	1.07151	1.00433	1.14318	29.2245	12	0.00364852	0.00328289	0.734957	0.389
189	Adenosine Deaminase levels	ebi-a-GCST90027164	Amyotrophic lateral sclerosis || id:ebi-a-GCST90027164	90274759	Simple mode	14	-0.0262616	0.0641915	0.689117	0.97408	0.858922	1.10468	29.2245	12	0.00364852	0.00328289	0.734957	0.389
190	Adenosine Deaminase levels	ebi-a-GCST90027164	Amyotrophic lateral sclerosis || id:ebi-a-GCST90027164	90274759	Weighted mode	14	0.0873434	0.0276193	0.00749059	1.09127	1.03377	1.15197	29.2245	12	0.00364852	0.00328289	0.734957	0.389
191	Adenosine Deaminase levels	ebi-a-GCST90027164	Amyotrophic lateral sclerosis || id:ebi-a-GCST90027164	90274789	MR Egger	11	0.202	0.171767	0.269758	1.22385	0.874011	1.71371	9.16607	9	0.422088	-0.0106934	0.497006	0.289
192	Fibroblast growth factor 23 levels	ebi-a-GCST90027164	Amyotrophic lateral sclerosis || id:ebi-a-GCST90027164	90274789	Weighted median	11	0.0431411	0.0725856	0.55228	1.04409	0.905628	1.20371	9.16607	9	0.422088	-0.0106934	0.497006	0.289
193	Fibroblast growth factor 23 levels	ebi-a-GCST90027164	Amyotrophic lateral sclerosis || id:ebi-a-GCST90027164	90274789	Inverse variance weighted	11	0.0862898	0.0522089	0.0983753	1.09012	0.984088	1.20758	9.16607	9	0.422088	-0.0106934	0.497006	0.289
194	Fibroblast growth factor 23 levels	ebi-a-GCST90027164	Amyotrophic lateral sclerosis || id:ebi-a-GCST90027164	90274789	Simple mode	11	-0.017184	0.11627	0.885443	0.982963	0.782647	1.23455	9.16607	9	0.422088	-0.0106934	0.497006	0.289
195	Fibroblast growth factor 23 levels	ebi-a-GCST90027164	Amyotrophic lateral sclerosis || id:ebi-a-GCST90027164	90274789	Weighted mode	11	0.0177517	0.0928909	0.852269	1.01791	0.848475	1.22118	9.16607	9	0.422088	-0.0106934	0.497006	0.289
196	Fibroblast growth factor 23 levels	ebi-a-GCST90027164	Amyotrophic lateral sclerosis || id:ebi-a-GCST90027164	90274838	MR Egger	13	0.128283	0.217778	0.567724	1.13687	0.741885	1.74216	26.6	11	0.00527895	-0.0112462	0.589498	0.019
197	Transforming growth factor-alpha levels	ebi-a-GCST90027164	Amyotrophic lateral sclerosis || id:ebi-a-GCST90027164	90274838	Weighted median	13	0.0614456	0.0764611	0.421617	1.06337	0.915378	1.23529	26.6	11	0.00527895	-0.0112462	0.589498	0.019
198	Transforming growth factor-alpha levels	ebi-a-GCST90027164	Amyotrophic lateral sclerosis || id:ebi-a-GCST90027164	90274838	Inverse variance weighted	13	0.015261	0.0756338	0.840093	1.01538	0.875481	1.17763	26.6	11	0.00527895	-0.0112462	0.589498	0.019
199	Transforming growth factor-alpha levels	ebi-a-GCST90027164	Amyotrophic lateral sclerosis || id:ebi-a-GCST90027164	90274838	Simple mode	13	0.139531	0.14859	0.366234	1.14973	0.85924	1.53844	26.6	11	0.00527895	-0.0112462	0.589498	0.019
200	Transforming growth factor-alpha levels	ebi-a-GCST90027164	Amyotrophic lateral sclerosis || id:ebi-a-GCST90027164	90274838	Weighted mode	13	0.108303	0.121336	0.389625	1.11439	0.878522	1.41357	26.6	11	0.00527895	-0.0112462	0.589498	0.019
201	Transforming growth factor-alpha levels	ebi-a-GCST90027164	Amyotrophic lateral sclerosis || id:ebi-a-GCST90027164	90274832	MR Egger	15	0.0697341	0.107976	0.529624	1.07222	0.867709	1.32494	12.3904	13	0.495919	-0.00772421	0.427107	0.03
202	Programmed cell death 1 ligand 1 levels	ebi-a-GCST90027164	Amyotrophic lateral sclerosis || id:ebi-a-GCST90027164	90274832	Weighted median	15	-0.00772591	0.0647187	0.904977	0.992304	0.874088	1.12651	12.3904	13	0.495919	-0.00772421	0.427107	0.03
203	Programmed cell death 1 ligand 1 levels	ebi-a-GCST90027164	Amyotrophic lateral sclerosis || id:ebi-a-GCST90027164	90274832	Inverse variance weighted	15	-0.0101971	0.0463929	0.826028	0.989855	0.903818	1.08408	12.3904	13	0.495919	-0.00772421	0.427107	0.03
204	Programmed cell death 1 ligand 1 levels	ebi-a-GCST90027164	Amyotrophic lateral sclerosis || id:ebi-a-GCST90027164	90274832	Simple mode	15	-0.00555634	0.10934	0.960189	0.994459	0.802628	1.23214	12.3904	13	0.495919	-0.00772421	0.427107	0.03
205	Programmed cell death 1 ligand 1 levels	ebi-a-GCST90027164	Amyotrophic lateral sclerosis || id:ebi-a-GCST90027164	90274832	Weighted mode	15	-0.00784378	0.0816149	0.924798	0.992187	0.845515	1.1643	12.3904	13	0.495919	-0.00772421	0.427107	0.03
206	Programmed cell death 1 ligand 1 levels	ebi-a-GCST90027164	Amyotrophic lateral sclerosis || id:ebi-a-GCST90027164	90274829	MR Egger	13	0.180477	0.136862	0.214072	1.19779	0.915969	1.56632	12.2821	11	0.342819	-0.0145813	0.250985	0.686
207	Neurotrophin-3 levels	ebi-a-GCST90027164	Amyotrophic lateral sclerosis || id:ebi-a-GCST90027164	90274829	Weighted median	13	0.0196983	0.0744407	0.791304	1.01989	0.881434	1.1801	12.2821	11	0.342819	-0.0145813	0.250985	0.686
208	Neurotrophin-3 levels	ebi-a-GCST90027164	Amyotrophic lateral sclerosis || id:ebi-a-GCST90027164	90274829	Inverse variance weighted	13	0.0297219	0.0581448	0.609232	1.03017	0.919209	1.15452	12.2821	11	0.342819	-0.0145813	0.250985	0.686
209	Neurotrophin-3 levels	ebi-a-GCST90027164	Amyotrophic lateral sclerosis || id:ebi-a-GCST90027164	90274829	Simple mode	13	0.0874594	0.125784	0.500103	1.0914	0.85293	1.39654	12.2821	11	0.342819	-0.0145813	0.250985	0.686
210	Neurotrophin-3 levels	ebi-a-GCST90027164	Amyotrophic lateral sclerosis || id:ebi-a-GCST90027164	90274829	Weighted mode	13	0.055803	0.112271	0.628143	1.05739	0.848531	1.31766	12.2821	11	0.342819	-0.0145813	0.250985	0.686
211	Neurotrophin-3 levels	ebi-a-GCST90027164	Amyotrophic lateral sclerosis || id:ebi-a-GCST90027164	90274815	MR Egger	9	0.0314389	0.101358	0.765458	1.03194	0.846011	1.25873	5.68274	7	0.577243	-0.00452923	0.697134	0.115
212	Interleukin-6 levels	ebi-a-GCST90027164	Amyotrophic lateral sclerosis || id:ebi-a-GCST90027164	90274815	Weighted median	9	0.0277044	0.0605542	0.647302	1.02809	0.913034	1.15765	5.68274	7	0.577243	-0.00452923	0.697134	0.115
213	Interleukin-6 levels	ebi-a-GCST90027164	Amyotrophic lateral sclerosis || id:ebi-a-GCST90027164	90274815	Inverse variance weighted	9	-0.00453636	0.0490633	0.926333	0.995474	0.904204	1.09596	5.68274	7	0.577243	-0.00452923	0.697134	0.115
214	Interleukin-6 levels	ebi-a-GCST90027164	Amyotrophic lateral sclerosis || id:ebi-a-GCST90027164	90274815	Simple mode	9	-0.0956671	0.125093	0.466369	0.908766	0.711165	1.16127	5.68274	7	0.577243	-0.00452923	0.697134	0.115
215	Interleukin-6 levels	ebi-a-GCST90027164	Amyotrophic lateral sclerosis || id:ebi-a-GCST90027164	90274815	Weighted mode	9	0.0504716	0.0651335	0.46069	1.05177	0.925714	1.19498	5.68274	7	0.577243	-0.00452923	0.697134	0.115
216	Interleukin-6 levels	ebi-a-GCST90027164	Amyotrophic lateral sclerosis || id:ebi-a-GCST90027164	90274760	MR Egger	18	0.252962	0.132569	0.0744801	1.28783	0.993151	1.66995	14.0269	16	0.596709	-0.0217162	0.0706592	0.003
217	Artemin levels	ebi-a-GCST90027164	Amyotrophic lateral sclerosis || id:ebi-a-GCST90027164	90274760	Weighted median	18	0.0348459	0.0579611	0.54771	1.03546	0.924264	1.16003	14.0269	16	0.596709	-0.0217162	0.0706592	0.003
218	Artemin levels	ebi-a-GCST90027164	Amyotrophic lateral sclerosis || id:ebi-a-GCST90027164	90274760	Inverse variance weighted	18	0.0102168	0.0441378	0.816945	1.01027	0.926544	1.10156	14.0269	16	0.596709	-0.0217162	0.0706592	0.003
219	Artemin levels	ebi-a-GCST90027164	Amyotrophic lateral sclerosis || id:ebi-a-GCST90027164	90274760	Simple mode	18	0.0946371	0.104373	0.377227	1.09926	0.895894	1.34879	14.0269	16	0.596709	-0.0217162	0.0706592	0.003
220	Artemin levels	ebi-a-GCST90027164	Amyotrophic lateral sclerosis || id:ebi-a-GCST90027164	90274760	Weighted mode	18	0.105147	0.11699	0.381327	1.11087	0.883245	1.39717	14.0269	16	0.596709	-0.0217162	0.0706592	0.003
221	Artemin levels	ebi-a-GCST90027164	Amyotrophic lateral sclerosis || id:ebi-a-GCST90027164	90274768	MR Egger	30	-0.0173757	0.0271898	0.527983	0.982774	0.931771	1.03657	32.62	28	0.250019	-0.000646148	0.898217	0.103
222	C-C motif chemokine 25 levels	ebi-a-GCST90027164	Amyotrophic lateral sclerosis || id:ebi-a-GCST90027164	90274768	Weighted median	30	-0.0282487	0.0213094	0.184956	0.972147	0.93238	1.01361	32.62	28	0.250019	-0.000646148	0.898217	0.103
223	C-C motif chemokine 25 levels	ebi-a-GCST90027164	Amyotrophic lateral sclerosis || id:ebi-a-GCST90027164	90274768	Inverse variance weighted	30	-0.0201031	0.0168195	0.232	0.980098	0.948314	1.01295	32.62	28	0.250019	-0.000646148	0.898217	0.103
224	C-C motif chemokine 25 levels	ebi-a-GCST90027164	Amyotrophic lateral sclerosis || id:ebi-a-GCST90027164	90274768	Simple mode	30	-0.00973847	0.039061	0.804875	0.990309	0.917321	1.0691	32.62	28	0.250019	-0.000646148	0.898217	0.103
225	C-C motif chemokine 25 levels	ebi-a-GCST90027164	Amyotrophic lateral sclerosis || id:ebi-a-GCST90027164	90274768	Weighted mode	30	-0.0173867	0.0192409	0.373634	0.982764	0.946392	1.02053	32.62	28	0.250019	-0.000646148	0.898217	0.103
226	C-C motif chemokine 25 levels	ebi-a-GCST90027164	Amyotrophic lateral sclerosis || id:ebi-a-GCST90027164	90274809	MR Egger	11	-0.0635276	0.1208	0.611676	0.938448	0.740599	1.18915	12.0086	9	0.212827	0.0102956	0.461513	0.289
227	Interleukin-22 receptor subunit alpha-1 levels	ebi-a-GCST90027164	Amyotrophic lateral sclerosis || id:ebi-a-GCST90027164	90274809	Weighted median	11	0.0307523	0.0768731	0.689127	1.03123	0.886992	1.19892	12.0086	9	0.212827	0.0102956	0.461513	0.289
228	Interleukin-22 receptor subunit alpha-1 levels	ebi-a-GCST90027164	Amyotrophic lateral sclerosis || id:ebi-a-GCST90027164	90274809	Inverse variance weighted	11	0.0154671	0.0622844	0.803879	1.01559	0.898876	1.14745	12.0086	9	0.212827	0.0102956	0.461513	0.289
229	Interleukin-22 receptor subunit alpha-1 levels	ebi-a-GCST90027164	Amyotrophic lateral sclerosis || id:ebi-a-GCST90027164	90274809	Simple mode	11	0.0603981	0.1267	0.643821	1.06226	0.828669	1.3617	12.0086	9	0.212827	0.0102956	0.461513	0.289
230	Interleukin-22 receptor subunit alpha-1 levels	ebi-a-GCST90027164	Amyotrophic lateral sclerosis || id:ebi-a-GCST90027164	90274809	Weighted mode	11	0.0580984	0.113914	0.621104	1.05982	0.847747	1.32494	12.0086	9	0.212827	0.0102956	0.461513	0.289
231	Interleukin-22 receptor subunit alpha-1 levels	ebi-a-GCST90027164	Amyotrophic lateral sclerosis || id:ebi-a-GCST90027164	90274797	MR Egger	20	-0.0111366	0.0456566	0.81005	0.988925	0.904273	1.0815	32.3259	18	0.0201119	-0.000520393	0.945782	0.77
232	Interleukin-10 receptor subunit beta levels	ebi-a-GCST90027164	Amyotrophic lateral sclerosis || id:ebi-a-GCST90027164	90274797	Weighted median	20	-0.0021704	0.0260668	0.933642	0.997832	0.948132	1.05014	32.3259	18	0.0201119	-0.000520393	0.945782	0.77
233	Interleukin-10 receptor subunit beta levels	ebi-a-GCST90027164	Amyotrophic lateral sclerosis || id:ebi-a-GCST90027164	90274797	Inverse variance weighted	20	-0.01347	0.0298396	0.651692	0.98662	0.930572	1.04604	32.3259	18	0.0201119	-0.000520393	0.945782	0.77
234	Interleukin-10 receptor subunit beta levels	ebi-a-GCST90027164	Amyotrophic lateral sclerosis || id:ebi-a-GCST90027164	90274797	Simple mode	20	0.0383989	0.086572	0.662378	1.03915	0.87697	1.23131	32.3259	18	0.0201119	-0.000520393	0.945782	0.77
235	Interleukin-10 receptor subunit beta levels	ebi-a-GCST90027164	Amyotrophic lateral sclerosis || id:ebi-a-GCST90027164	90274797	Weighted mode	20	-0.00029563	0.0264853	0.991211	0.999704	0.949133	1.05297	32.3259	18	0.0201119	-0.000520393	0.945782	0.77
236	Interleukin-10 receptor subunit beta levels	ebi-a-GCST90027164	Amyotrophic lateral sclerosis || id:ebi-a-GCST90027164	90274774	MR Egger	20	-0.00277611	0.0356347	0.938763	0.997228	0.929954	1.06937	26.3651	18	0.0916983	0.000283918	0.971452	0.313
237	T-cell surface glycoprotein CD6 isoform levels	ebi-a-GCST90027164	Amyotrophic lateral sclerosis || id:ebi-a-GCST90027164	90274774	Weighted median	20	-0.0010196	0.0231108	0.964811	0.998981	0.954739	1.04527	26.3651	18	0.0916983	0.000283918	0.971452	0.313
238	T-cell surface glycoprotein CD6 isoform levels	ebi-a-GCST90027164	Amyotrophic lateral sclerosis || id:ebi-a-GCST90027164	90274774	Inverse variance weighted	20	-0.00180433	0.022883	0.937152	0.998197	0.954417	1.04399	26.3651	18	0.0916983	0.000283918	0.971452	0.313
239	T-cell surface glycoprotein CD6 isoform levels	ebi-a-GCST90027164	Amyotrophic lateral sclerosis || id:ebi-a-GCST90027164	90274774	Simple mode	20	-0.0552678	0.0633802	0.394092	0.946232	0.835694	1.07139	26.3651	18	0.0916983	0.000283918	0.971452	0.313
240	T-cell surface glycoprotein CD6 isoform levels	ebi-a-GCST90027164	Amyotrophic lateral sclerosis || id:ebi-a-GCST90027164	90274774	Weighted mode	20	-0.00681409	0.0216987	0.756918	0.993209	0.951854	1.03636	26.3651	18	0.0916983	0.000283918	0.971452	0.313
241	T-cell surface glycoprotein CD6 isoform levels	ebi-a-GCST90027164	Amyotrophic lateral sclerosis || id:ebi-a-GCST90027164	90274805	MR Egger	12	-0.197839	0.138639	0.184046	0.820502	0.62527	1.07669	9.57056	10	0.478942	0.0174224	0.221534	0.906
242	Interleukin-1-alpha levels	ebi-a-GCST90027164	Amyotrophic lateral sclerosis || id:ebi-a-GCST90027164	90274805	Weighted median	12	-0.0207458	0.0715521	0.771862	0.979468	0.851302	1.12693	9.57056	10	0.478942	0.0174224	0.221534	0.906
243	Interleukin-1-alpha levels	ebi-a-GCST90027164	Amyotrophic lateral sclerosis || id:ebi-a-GCST90027164	90274805	Inverse variance weighted	12	-0.0307383	0.0534962	0.565569	0.969729	0.8732	1.07693	9.57056	10	0.478942	0.0174224	0.221534	0.906
244	Interleukin-1-alpha levels	ebi-a-GCST90027164	Amyotrophic lateral sclerosis || id:ebi-a-GCST90027164	90274805	Simple mode	12	-0.00419784	0.130218	0.974861	0.995811	0.771495	1.28535	9.57056	10	0.478942	0.0174224	0.221534	0.906
245	Interleukin-1-alpha levels	ebi-a-GCST90027164	Amyotrophic lateral sclerosis || id:ebi-a-GCST90027164	90274805	Weighted mode	12	0.00236682	0.119684	0.984577	1.00237	0.792777	1.26737	9.57056	10	0.478942	0.0174224	0.221534	0.906
246	Interleukin-1-alpha levels	ebi-a-GCST90027164	Amyotrophic lateral sclerosis || id:ebi-a-GCST90027164	90274824	MR Egger	19	0.0632271	0.0555711	0.270999	1.06527	0.955336	1.18785	13.4769	17	0.703723	-0.0128718	0.132258	0.571
247	Monocyte chemoattractant protein-4 levels	ebi-a-GCST90027164	Amyotrophic lateral sclerosis || id:ebi-a-GCST90027164	90274824	Weighted median	19	0.0117996	0.0374556	0.75274	1.01187	0.940246	1.08895	13.4769	17	0.703723	-0.0128718	0.132258	0.571
248	Monocyte chemoattractant protein-4 levels	ebi-a-GCST90027164	Amyotrophic lateral sclerosis || id:ebi-a-GCST90027164	90274824	Inverse variance weighted	19	-0.0136407	0.0269235	0.612403	0.986452	0.935747	1.0399	13.4769	17	0.703723	-0.0128718	0.132258	0.571
249	Monocyte chemoattractant protein-4 levels	ebi-a-GCST90027164	Amyotrophic lateral sclerosis || id:ebi-a-GCST90027164	90274824	Simple mode	19	0.0294128	0.0610229	0.635617	1.02985	0.913756	1.16069	13.4769	17	0.703723	-0.0128718	0.132258	0.571
250	Monocyte chemoattractant protein-4 levels	ebi-a-GCST90027164	Amyotrophic lateral sclerosis || id:ebi-a-GCST90027164	90274824	Weighted mode	19	0.027438	0.0358216	0.453627	1.02782	0.958129	1.10257	13.4769	17	0.703723	-0.0128718	0.132258	0.571
251	Monocyte chemoattractant protein-4 levels	ebi-a-GCST90027164	Amyotrophic lateral sclerosis || id:ebi-a-GCST90027164	90274816	MR Egger	11	0.147336	0.158821	0.377778	1.15874	0.848782	1.5819	7.62143	9	0.5727	-0.0188143	0.173971	0.324
252	Interleukin-7 levels	ebi-a-GCST90027164	Amyotrophic lateral sclerosis || id:ebi-a-GCST90027164	90274816	Weighted median	11	-0.121025	0.0778644	0.120113	0.886012	0.760607	1.03209	7.62143	9	0.5727	-0.0188143	0.173971	0.324
253	Interleukin-7 levels	ebi-a-GCST90027164	Amyotrophic lateral sclerosis || id:ebi-a-GCST90027164	90274816	Inverse variance weighted	11	-0.0719805	0.056168	0.20001	0.930549	0.833543	1.03884	7.62143	9	0.5727	-0.0188143	0.173971	0.324
254	Interleukin-7 levels	ebi-a-GCST90027164	Amyotrophic lateral sclerosis || id:ebi-a-GCST90027164	90274816	Simple mode	11	-0.144128	0.127747	0.285561	0.865777	0.674009	1.11211	7.62143	9	0.5727	-0.0188143	0.173971	0.324
255	Interleukin-7 levels	ebi-a-GCST90027164	Amyotrophic lateral sclerosis || id:ebi-a-GCST90027164	90274816	Weighted mode	11	-0.139151	0.128288	0.303521	0.870097	0.676654	1.11884	7.62143	9	0.5727	-0.0188143	0.173971	0.324
256	Interleukin-7 levels	ebi-a-GCST90027164	Amyotrophic lateral sclerosis || id:ebi-a-GCST90027164	90274772	MR Egger	18	0.0397363	0.035056	0.2737	1.04054	0.971442	1.11454	14.0553	16	0.594598	-0.00272418	0.630997	0.917
257	CD40L receptor levels	ebi-a-GCST90027164	Amyotrophic lateral sclerosis || id:ebi-a-GCST90027164	90274772	Weighted median	18	0.0363183	0.0282163	0.198046	1.03699	0.981193	1.09595	14.0553	16	0.594598	-0.00272418	0.630997	0.917
258	CD40L receptor levels	ebi-a-GCST90027164	Amyotrophic lateral sclerosis || id:ebi-a-GCST90027164	90274772	Inverse variance weighted	18	0.0271795	0.0239039	0.255526	1.02755	0.98052	1.07684	14.0553	16	0.594598	-0.00272418	0.630997	0.917
259	CD40L receptor levels	ebi-a-GCST90027164	Amyotrophic lateral sclerosis || id:ebi-a-GCST90027164	90274772	Simple mode	18	0.0388378	0.0773075	0.621845	1.0396	0.893432	1.20969	14.0553	16	0.594598	-0.00272418	0.630997	0.917
260	CD40L receptor levels	ebi-a-GCST90027164	Amyotrophic lateral sclerosis || id:ebi-a-GCST90027164	90274772	Weighted mode	18	0.0371416	0.0305749	0.241056	1.03784	0.977473	1.10194	14.0553	16	0.594598	-0.00272418	0.630997	0.917
261	CD40L receptor levels	ebi-a-GCST90027164	Amyotrophic lateral sclerosis || id:ebi-a-GCST90027164	90274785	MR Egger	17	0.0379708	0.0758664	0.62399	1.0387	0.895183	1.20523	14.5774	15	0.482263	-0.00999863	0.222068	0.497
262	Delta and Notch-like epidermal growth factor-related receptor levels	ebi-a-GCST90027164	Amyotrophic lateral sclerosis || id:ebi-a-GCST90027164	90274785	Weighted median	17	-0.00112177	0.0492153	0.981815	0.998879	0.907026	1.10003	14.5774	15	0.482263	-0.00999863	0.222068	0.497
263	Delta and Notch-like epidermal growth factor-related receptor levels	ebi-a-GCST90027164	Amyotrophic lateral sclerosis || id:ebi-a-GCST90027164	90274785	Inverse variance weighted	17	-0.0482953	0.0344234	0.160623	0.952852	0.890684	1.01936	14.5774	15	0.482263	-0.00999863	0.222068	0.497
264	Delta and Notch-like epidermal growth factor-related receptor levels	ebi-a-GCST90027164	Amyotrophic lateral sclerosis || id:ebi-a-GCST90027164	90274785	Simple mode	17	0.0337036	0.0895568	0.71161	1.03428	0.867771	1.23273	14.5774	15	0.482263	-0.00999863	0.222068	0.497
265	Delta and Notch-like epidermal growth factor-related receptor levels	ebi-a-GCST90027164	Amyotrophic lateral sclerosis || id:ebi-a-GCST90027164	90274785	Weighted mode	17	0.0176839	0.0531248	0.74355	1.01784	0.91719	1.12954	14.5774	15	0.482263	-0.00999863	0.222068	0.497
266	Delta and Notch-like epidermal growth factor-related receptor levels	ebi-a-GCST90027164	Amyotrophic lateral sclerosis || id:ebi-a-GCST90027164	90274814	MR Egger	7	-0.01281	0.262797	0.96301	0.987272	0.589847	1.65247	7.49049	5	0.186642	0.00219148	0.928872	0.182
267	Interleukin-5 levels	ebi-a-GCST90027164	Amyotrophic lateral sclerosis || id:ebi-a-GCST90027164	90274814	Weighted median	7	-0.024542	0.0845409	0.771589	0.975757	0.826759	1.15161	7.49049	5	0.186642	0.00219148	0.928872	0.182
268	Interleukin-5 levels	ebi-a-GCST90027164	Amyotrophic lateral sclerosis || id:ebi-a-GCST90027164	90274814	Inverse variance weighted	7	0.0106828	0.0731081	0.883824	1.01074	0.875807	1.16646	7.49049	5	0.186642	0.00219148	0.928872	0.182
269	Interleukin-5 levels	ebi-a-GCST90027164	Amyotrophic lateral sclerosis || id:ebi-a-GCST90027164	90274814	Simple mode	7	-0.0349677	0.125417	0.78975	0.965637	0.755191	1.23473	7.49049	5	0.186642	0.00219148	0.928872	0.182
270	Interleukin-5 levels	ebi-a-GCST90027164	Amyotrophic lateral sclerosis || id:ebi-a-GCST90027164	90274814	Weighted mode	7	-0.0300899	0.113174	0.799236	0.970358	0.777314	1.21134	7.49049	5	0.186642	0.00219148	0.928872	0.182
271	Interleukin-5 levels	ebi-a-GCST90027164	Amyotrophic lateral sclerosis || id:ebi-a-GCST90027164	90274830	MR Egger	21	-0.148759	0.0878281	0.106644	0.861777	0.725494	1.02366	27.9153	19	0.085073	0.00771154	0.439993	0.125
272	Osteoprotegerin levels	ebi-a-GCST90027164	Amyotrophic lateral sclerosis || id:ebi-a-GCST90027164	90274830	Weighted median	21	-0.0660078	0.0521988	0.206034	0.936124	0.845086	1.03697	27.9153	19	0.085073	0.00771154	0.439993	0.125
273	Osteoprotegerin levels	ebi-a-GCST90027164	Amyotrophic lateral sclerosis || id:ebi-a-GCST90027164	90274830	Inverse variance weighted	21	-0.0874704	0.0405492	0.0309943	0.916246	0.846245	0.992038	27.9153	19	0.085073	0.00771154	0.439993	0.125
274	Osteoprotegerin levels	ebi-a-GCST90027164	Amyotrophic lateral sclerosis || id:ebi-a-GCST90027164	90274830	Simple mode	21	-0.178806	0.0946245	0.0733909	0.836268	0.694703	1.00668	27.9153	19	0.085073	0.00771154	0.439993	0.125
275	Osteoprotegerin levels	ebi-a-GCST90027164	Amyotrophic lateral sclerosis || id:ebi-a-GCST90027164	90274830	Weighted mode	21	-0.0580628	0.0659397	0.389023	0.943591	0.829191	1.07377	27.9153	19	0.085073	0.00771154	0.439993	0.125
276	Osteoprotegerin levels	ebi-a-GCST90027164	Amyotrophic lateral sclerosis || id:ebi-a-GCST90027164	90274776	MR Egger	15	-0.268762	0.104561	0.023277	0.764325	0.622692	0.938172	13.0174	13	0.446469	0.0319764	0.0119854	0.304
277	Macrophage colony-stimulating factor 1 levels	ebi-a-GCST90027164	Amyotrophic lateral sclerosis || id:ebi-a-GCST90027164	90274776	Weighted median	15	-0.045714	0.0593678	0.441291	0.955315	0.850378	1.0732	13.0174	13	0.446469	0.0319764	0.0119854	0.304
278	Macrophage colony-stimulating factor 1 levels	ebi-a-GCST90027164	Amyotrophic lateral sclerosis || id:ebi-a-GCST90027164	90274776	Inverse variance weighted	15	0.0102167	0.0524893	0.845671	1.01027	0.911501	1.11974	13.0174	13	0.446469	0.0319764	0.0119854	0.304
279	Macrophage colony-stimulating factor 1 levels	ebi-a-GCST90027164	Amyotrophic lateral sclerosis || id:ebi-a-GCST90027164	90274776	Simple mode	15	-0.107262	0.118801	0.381867	0.89829	0.71169	1.13382	13.0174	13	0.446469	0.0319764	0.0119854	0.304
280	Macrophage colony-stimulating factor 1 levels	ebi-a-GCST90027164	Amyotrophic lateral sclerosis || id:ebi-a-GCST90027164	90274776	Weighted mode	15	-0.0598	0.0615749	0.347943	0.941953	0.834864	1.06278	13.0174	13	0.446469	0.0319764	0.0119854	0.304
281	Macrophage colony-stimulating factor 1 levels	ebi-a-GCST90027164	Amyotrophic lateral sclerosis || id:ebi-a-GCST90027164	90274765	MR Egger	21	0.00521315	0.0809738	0.94934	1.00523	0.857705	1.17812	43.2891	19	0.00118335	0.000182239	0.985281	0.344
282	C-C motif chemokine 19 levels	ebi-a-GCST90027164	Amyotrophic lateral sclerosis || id:ebi-a-GCST90027164	90274765	Weighted median	21	-0.0275459	0.0496073	0.578704	0.97283	0.882694	1.07217	43.2891	19	0.00118335	0.000182239	0.985281	0.344
283	C-C motif chemokine 19 levels	ebi-a-GCST90027164	Amyotrophic lateral sclerosis || id:ebi-a-GCST90027164	90274765	Inverse variance weighted	21	0.00642878	0.0470267	0.891264	1.00645	0.917829	1.10363	43.2891	19	0.00118335	0.000182239	0.985281	0.344
284	C-C motif chemokine 19 levels	ebi-a-GCST90027164	Amyotrophic lateral sclerosis || id:ebi-a-GCST90027164	90274765	Simple mode	21	-0.112873	0.0957466	0.252285	0.893264	0.740421	1.07766	43.2891	19	0.00118335	0.000182239	0.985281	0.344
285	C-C motif chemokine 19 levels	ebi-a-GCST90027164	Amyotrophic lateral sclerosis || id:ebi-a-GCST90027164	90274765	Weighted mode	21	-0.0840437	0.0694156	0.240112	0.919391	0.80244	1.05339	43.2891	19	0.00118335	0.000182239	0.985281	0.344
286	C-C motif chemokine 19 levels	ebi-a-GCST90027164	Amyotrophic lateral sclerosis || id:ebi-a-GCST90027164	90274788	MR Egger	12	0.243804	0.14339	0.119914	1.27609	0.963445	1.6902	17.5712	10	0.062642	-0.0288271	0.0717877	0.954
287	Fibroblast growth factor 21 levels	ebi-a-GCST90027164	Amyotrophic lateral sclerosis || id:ebi-a-GCST90027164	90274788	Weighted median	12	0.0820084	0.0655234	0.210719	1.08546	0.954643	1.23421	17.5712	10	0.062642	-0.0288271	0.0717877	0.954
288	Fibroblast growth factor 21 levels	ebi-a-GCST90027164	Amyotrophic lateral sclerosis || id:ebi-a-GCST90027164	90274788	Inverse variance weighted	12	-0.0183615	0.0678447	0.786668	0.981806	0.859558	1.12144	17.5712	10	0.062642	-0.0288271	0.0717877	0.954
289	Fibroblast growth factor 21 levels	ebi-a-GCST90027164	Amyotrophic lateral sclerosis || id:ebi-a-GCST90027164	90274788	Simple mode	12	-0.121353	0.132084	0.377932	0.885722	0.683699	1.14744	17.5712	10	0.062642	-0.0288271	0.0717877	0.954
290	Fibroblast growth factor 21 levels	ebi-a-GCST90027164	Amyotrophic lateral sclerosis || id:ebi-a-GCST90027164	90274788	Weighted mode	12	0.0632281	0.0654714	0.354929	1.06527	0.936978	1.21113	17.5712	10	0.062642	-0.0288271	0.0717877	0.954
291	Fibroblast growth factor 21 levels	ebi-a-GCST90027164	Amyotrophic lateral sclerosis || id:ebi-a-GCST90027164	90274845	MR Egger	9	-0.0515446	0.203356	0.807188	0.949761	0.637551	1.41486	10.9722	7	0.139836	-0.00216492	0.917467	0.258
292	Thymic stromal lymphopoietin levels	ebi-a-GCST90027164	Amyotrophic lateral sclerosis || id:ebi-a-GCST90027164	90274845	Weighted median	9	-0.0760445	0.0900742	0.398533	0.926775	0.776786	1.10572	10.9722	7	0.139836	-0.00216492	0.917467	0.258
293	Thymic stromal lymphopoietin levels	ebi-a-GCST90027164	Amyotrophic lateral sclerosis || id:ebi-a-GCST90027164	90274845	Inverse variance weighted	9	-0.0717564	0.0722297	0.320492	0.930758	0.807892	1.07231	10.9722	7	0.139836	-0.00216492	0.917467	0.258
294	Thymic stromal lymphopoietin levels	ebi-a-GCST90027164	Amyotrophic lateral sclerosis || id:ebi-a-GCST90027164	90274845	Simple mode	9	-0.125857	0.153063	0.434754	0.881741	0.653207	1.19023	10.9722	7	0.139836	-0.00216492	0.917467	0.258
295	Thymic stromal lymphopoietin levels	ebi-a-GCST90027164	Amyotrophic lateral sclerosis || id:ebi-a-GCST90027164	90274845	Weighted mode	9	-0.114536	0.138836	0.433295	0.89178	0.679326	1.17068	10.9722	7	0.139836	-0.00216492	0.917467	0.258
296	Thymic stromal lymphopoietin levels	ebi-a-GCST90027164	Amyotrophic lateral sclerosis || id:ebi-a-GCST90027164	90274842	MR Egger	24	-0.0434296	0.0472796	0.368283	0.9575	0.872757	1.05047	22.2972	22	0.442275	0.00084946	0.888862	0.007
297	Tumor necrosis factor ligand superfamily member 14 levels	ebi-a-GCST90027164	Amyotrophic lateral sclerosis || id:ebi-a-GCST90027164	90274842	Weighted median	24	-0.0353044	0.0447329	0.429979	0.965312	0.884281	1.05377	22.2972	22	0.442275	0.00084946	0.888862	0.007
298	Tumor necrosis factor ligand superfamily member 14 levels	ebi-a-GCST90027164	Amyotrophic lateral sclerosis || id:ebi-a-GCST90027164	90274842	Inverse variance weighted	24	-0.0380458	0.027832	0.171631	0.962669	0.911561	1.01664	22.2972	22	0.442275	0.00084946	0.888862	0.007
299	Tumor necrosis factor ligand superfamily member 14 levels	ebi-a-GCST90027164	Amyotrophic lateral sclerosis || id:ebi-a-GCST90027164	90274842	Simple mode	24	-0.0354363	0.0872766	0.688479	0.965184	0.813427	1.14525	22.2972	22	0.442275	0.00084946	0.888862	0.007
300	Tumor necrosis factor ligand superfamily member 14 levels	ebi-a-GCST90027164	Amyotrophic lateral sclerosis || id:ebi-a-GCST90027164	90274842	Weighted mode	24	-0.0354363	0.0473514	0.461823	0.965184	0.879638	1.05905	22.2972	22	0.442275	0.00084946	0.888862	0.007
301	Tumor necrosis factor ligand superfamily member 14 levels	ebi-a-GCST90027164	Amyotrophic lateral sclerosis || id:ebi-a-GCST90027164	90274818	MR Egger	18	0.0520944	0.0734946	0.488637	1.05348	0.912146	1.2167	22.4501	16	0.129243	-0.00588654	0.472911	0.602
302	Latency-associated peptide transforming growth factor beta 1 levels	ebi-a-GCST90027164	Amyotrophic lateral sclerosis || id:ebi-a-GCST90027164	90274818	Weighted median	18	-0.00713169	0.0564106	0.899396	0.992894	0.888966	1.10897	22.4501	16	0.129243	-0.00588654	0.472911	0.602
303	Latency-associated peptide transforming growth factor beta 1 levels	ebi-a-GCST90027164	Amyotrophic lateral sclerosis || id:ebi-a-GCST90027164	90274818	Inverse variance weighted	18	0.00887429	0.0434988	0.838344	1.00891	0.926461	1.0987	22.4501	16	0.129243	-0.00588654	0.472911	0.602
304	Latency-associated peptide transforming growth factor beta 1 levels	ebi-a-GCST90027164	Amyotrophic lateral sclerosis || id:ebi-a-GCST90027164	90274818	Simple mode	18	-0.0595892	0.130479	0.65367	0.942151	0.72955	1.21671	22.4501	16	0.129243	-0.00588654	0.472911	0.602
305	Latency-associated peptide transforming growth factor beta 1 levels	ebi-a-GCST90027164	Amyotrophic lateral sclerosis || id:ebi-a-GCST90027164	90274818	Weighted mode	18	0.0677776	0.0834737	0.428036	1.07013	0.908618	1.26035	22.4501	16	0.129243	-0.00588654	0.472911	0.602
306	Latency-associated peptide transforming growth factor beta 1 levels	ebi-a-GCST90027164	Amyotrophic lateral sclerosis || id:ebi-a-GCST90027164	90274828	MR Egger	10	0.0878112	0.196545	0.666885	1.09178	0.742735	1.60486	22.2793	8	0.00442389	-0.0142437	0.47217	0.194
307	Neurturin levels	ebi-a-GCST90027164	Amyotrophic lateral sclerosis || id:ebi-a-GCST90027164	90274828	Weighted median	10	-0.0521135	0.0880002	0.553718	0.949221	0.798841	1.12791	22.2793	8	0.00442389	-0.0142437	0.47217	0.194
308	Neurturin levels	ebi-a-GCST90027164	Amyotrophic lateral sclerosis || id:ebi-a-GCST90027164	90274828	Inverse variance weighted	10	-0.0426668	0.0911415	0.639686	0.958231	0.801473	1.14565	22.2793	8	0.00442389	-0.0142437	0.47217	0.194
309	Neurturin levels	ebi-a-GCST90027164	Amyotrophic lateral sclerosis || id:ebi-a-GCST90027164	90274828	Simple mode	10	-0.122667	0.179934	0.512567	0.884558	0.621675	1.2586	22.2793	8	0.00442389	-0.0142437	0.47217	0.194
310	Neurturin levels	ebi-a-GCST90027164	Amyotrophic lateral sclerosis || id:ebi-a-GCST90027164	90274828	Weighted mode	10	0.103243	0.165962	0.549319	1.10876	0.800881	1.535	22.2793	8	0.00442389	-0.0142437	0.47217	0.194
311	Neurturin levels	ebi-a-GCST90027164	Amyotrophic lateral sclerosis || id:ebi-a-GCST90027164	90274763	MR Egger	11	-0.0341271	0.118152	0.779246	0.966449	0.766665	1.21829	5.57763	9	0.781333	0.00439246	0.751102	0.062
312	Caspase 8 levels	ebi-a-GCST90027164	Amyotrophic lateral sclerosis || id:ebi-a-GCST90027164	90274763	Weighted median	11	0.0241489	0.0650861	0.710615	1.02444	0.901748	1.16383	5.57763	9	0.781333	0.00439246	0.751102	0.062
313	Caspase 8 levels	ebi-a-GCST90027164	Amyotrophic lateral sclerosis || id:ebi-a-GCST90027164	90274763	Inverse variance weighted	11	0.0010073	0.0491912	0.983663	1.00101	0.909003	1.10233	5.57763	9	0.781333	0.00439246	0.751102	0.062
314	Caspase 8 levels	ebi-a-GCST90027164	Amyotrophic lateral sclerosis || id:ebi-a-GCST90027164	90274763	Simple mode	11	-0.00691994	0.100113	0.946255	0.993104	0.816164	1.2084	5.57763	9	0.781333	0.00439246	0.751102	0.062
315	Caspase 8 levels	ebi-a-GCST90027164	Amyotrophic lateral sclerosis || id:ebi-a-GCST90027164	90274763	Weighted mode	11	0.0254225	0.0754044	0.742974	1.02575	0.884821	1.18912	5.57763	9	0.781333	0.00439246	0.751102	0.062
316	Caspase 8 levels	ebi-a-GCST90027164	Amyotrophic lateral sclerosis || id:ebi-a-GCST90027164	90274846	MR Egger	27	0.15031	0.071797	0.0466055	1.16219	1.00963	1.33781	32.3769	25	0.147394	-0.0157268	0.0575943	0.033
317	Tumor necrosis factor ligand superfamily member 12 levels	ebi-a-GCST90027164	Amyotrophic lateral sclerosis || id:ebi-a-GCST90027164	90274846	Weighted median	27	0.0264726	0.0502802	0.59854	1.02683	0.93046	1.13317	32.3769	25	0.147394	-0.0157268	0.0575943	0.033
318	Tumor necrosis factor ligand superfamily member 12 levels	ebi-a-GCST90027164	Amyotrophic lateral sclerosis || id:ebi-a-GCST90027164	90274846	Inverse variance weighted	27	0.023922	0.0353598	0.498703	1.02421	0.955631	1.09771	32.3769	25	0.147394	-0.0157268	0.0575943	0.033
319	Tumor necrosis factor ligand superfamily member 12 levels	ebi-a-GCST90027164	Amyotrophic lateral sclerosis || id:ebi-a-GCST90027164	90274846	Simple mode	27	-0.00185437	0.104443	0.98597	0.998147	0.813375	1.22489	32.3769	25	0.147394	-0.0157268	0.0575943	0.033
320	Tumor necrosis factor ligand superfamily member 12 levels	ebi-a-GCST90027164	Amyotrophic lateral sclerosis || id:ebi-a-GCST90027164	90274846	Weighted mode	27	0.157767	0.0653519	0.0231124	1.17089	1.03012	1.3309	32.3769	25	0.147394	-0.0157268	0.0575943	0.033
321	Tumor necrosis factor ligand superfamily member 12 levels	ebi-a-GCST90027164	Amyotrophic lateral sclerosis || id:ebi-a-GCST90027164	90274819	MR Egger	8	0.400457	0.176119	0.0633373	1.49251	1.05682	2.10781	5.72762	6	0.454383	-0.0352883	0.074415	0.366
322	Leukemia inhibitory factor levels	ebi-a-GCST90027164	Amyotrophic lateral sclerosis || id:ebi-a-GCST90027164	90274819	Weighted median	8	0.0554236	0.0872405	0.525234	1.05699	0.89086	1.2541	5.72762	6	0.454383	-0.0352883	0.074415	0.366
323	Leukemia inhibitory factor levels	ebi-a-GCST90027164	Amyotrophic lateral sclerosis || id:ebi-a-GCST90027164	90274819	Inverse variance weighted	8	0.0474558	0.0791745	0.548918	1.0486	0.897873	1.22463	5.72762	6	0.454383	-0.0352883	0.074415	0.366
324	Leukemia inhibitory factor levels	ebi-a-GCST90027164	Amyotrophic lateral sclerosis || id:ebi-a-GCST90027164	90274819	Simple mode	8	0.0626093	0.116005	0.60613	1.06461	0.848096	1.3364	5.72762	6	0.454383	-0.0352883	0.074415	0.366
325	Leukemia inhibitory factor levels	ebi-a-GCST90027164	Amyotrophic lateral sclerosis || id:ebi-a-GCST90027164	90274819	Weighted mode	8	0.0602193	0.111423	0.605644	1.06207	0.853704	1.32129	5.72762	6	0.454383	-0.0352883	0.074415	0.366
326	Leukemia inhibitory factor levels	ebi-a-GCST90027164	Amyotrophic lateral sclerosis || id:ebi-a-GCST90027164	90274769	MR Egger	23	0.0986249	0.0896271	0.283616	1.10365	0.925849	1.3156	14.5336	21	0.845607	-0.013252	0.0946813	0.065
327	C-C motif chemokine 28 levels	ebi-a-GCST90027164	Amyotrophic lateral sclerosis || id:ebi-a-GCST90027164	90274769	Weighted median	23	-0.0314067	0.0560081	0.574966	0.969081	0.868331	1.08152	14.5336	21	0.845607	-0.013252	0.0946813	0.065
328	C-C motif chemokine 28 levels	ebi-a-GCST90027164	Amyotrophic lateral sclerosis || id:ebi-a-GCST90027164	90274769	Inverse variance weighted	23	-0.0410942	0.0407453	0.313184	0.959739	0.886074	1.03953	14.5336	21	0.845607	-0.013252	0.0946813	0.065
329	C-C motif chemokine 28 levels	ebi-a-GCST90027164	Amyotrophic lateral sclerosis || id:ebi-a-GCST90027164	90274769	Simple mode	23	-0.0336114	0.103878	0.749321	0.966947	0.788824	1.18529	14.5336	21	0.845607	-0.013252	0.0946813	0.065
330	C-C motif chemokine 28 levels	ebi-a-GCST90027164	Amyotrophic lateral sclerosis || id:ebi-a-GCST90027164	90274769	Weighted mode	23	-0.0336114	0.106594	0.755488	0.966947	0.784636	1.19162	14.5336	21	0.845607	-0.013252	0.0946813	0.065
331	C-C motif chemokine 28 levels	ebi-a-GCST90027164	Amyotrophic lateral sclerosis || id:ebi-a-GCST90027164	90274796	MR Egger	9	-0.217182	0.133925	0.148906	0.804784	0.618984	1.04635	4.44668	7	0.727128	0.0217004	0.136756	0.248
332	Interleukin-10 receptor subunit alpha levels	ebi-a-GCST90027164	Amyotrophic lateral sclerosis || id:ebi-a-GCST90027164	90274796	Weighted median	9	-0.0142856	0.0817102	0.861211	0.985816	0.839929	1.15704	4.44668	7	0.727128	0.0217004	0.136756	0.248
333	Interleukin-10 receptor subunit alpha levels	ebi-a-GCST90027164	Amyotrophic lateral sclerosis || id:ebi-a-GCST90027164	90274796	Inverse variance weighted	9	-0.0170455	0.0612542	0.780801	0.983099	0.87188	1.10851	4.44668	7	0.727128	0.0217004	0.136756	0.248
334	Interleukin-10 receptor subunit alpha levels	ebi-a-GCST90027164	Amyotrophic lateral sclerosis || id:ebi-a-GCST90027164	90274796	Simple mode	9	-0.0118967	0.125098	0.926575	0.988174	0.773299	1.26276	4.44668	7	0.727128	0.0217004	0.136756	0.248
335	Interleukin-10 receptor subunit alpha levels	ebi-a-GCST90027164	Amyotrophic lateral sclerosis || id:ebi-a-GCST90027164	90274796	Weighted mode	9	9.33e-05	0.127139	0.999433	1.00009	0.779503	1.28311	4.44668	7	0.727128	0.0217004	0.136756	0.248
336	Interleukin-10 receptor subunit alpha levels	ebi-a-GCST90027164	Amyotrophic lateral sclerosis || id:ebi-a-GCST90027164	90274813	MR Egger	9	-0.0970125	0.179712	0.606059	0.907545	0.638107	1.29075	12.3541	7	0.0894993	0.00762596	0.678466	0.653
337	Interleukin-4 levels	ebi-a-GCST90027164	Amyotrophic lateral sclerosis || id:ebi-a-GCST90027164	90274813	Weighted median	9	-0.0836264	0.0851941	0.326298	0.919775	0.778328	1.08693	12.3541	7	0.0894993	0.00762596	0.678466	0.653
338	Interleukin-4 levels	ebi-a-GCST90027164	Amyotrophic lateral sclerosis || id:ebi-a-GCST90027164	90274813	Inverse variance weighted	9	-0.0268077	0.0730152	0.713505	0.973548	0.843734	1.12334	12.3541	7	0.0894993	0.00762596	0.678466	0.653
339	Interleukin-4 levels	ebi-a-GCST90027164	Amyotrophic lateral sclerosis || id:ebi-a-GCST90027164	90274813	Simple mode	9	-0.138854	0.15944	0.409188	0.870355	0.636764	1.18964	12.3541	7	0.0894993	0.00762596	0.678466	0.653
340	Interleukin-4 levels	ebi-a-GCST90027164	Amyotrophic lateral sclerosis || id:ebi-a-GCST90027164	90274813	Weighted mode	9	-0.146555	0.154379	0.370251	0.863678	0.638177	1.16886	12.3541	7	0.0894993	0.00762596	0.678466	0.653
341	Interleukin-4 levels	ebi-a-GCST90027164	Amyotrophic lateral sclerosis || id:ebi-a-GCST90027164	90274793	MR Egger	17	-0.0271727	0.0980222	0.785403	0.973193	0.803084	1.17934	13.2523	15	0.582814	0.0128094	0.231948	0.242
342	Hepatocyte growth factor levels	ebi-a-GCST90027164	Amyotrophic lateral sclerosis || id:ebi-a-GCST90027164	90274793	Weighted median	17	0.120211	0.0629661	0.0562437	1.12774	0.996803	1.27587	13.2523	15	0.582814	0.0128094	0.231948	0.242
343	Hepatocyte growth factor levels	ebi-a-GCST90027164	Amyotrophic lateral sclerosis || id:ebi-a-GCST90027164	90274793	Inverse variance weighted	17	0.0824099	0.0432554	0.0567551	1.0859	0.997632	1.18198	13.2523	15	0.582814	0.0128094	0.231948	0.242
344	Hepatocyte growth factor levels	ebi-a-GCST90027164	Amyotrophic lateral sclerosis || id:ebi-a-GCST90027164	90274793	Simple mode	17	0.188694	0.124812	0.150078	1.20767	0.945598	1.54238	13.2523	15	0.582814	0.0128094	0.231948	0.242
345	Hepatocyte growth factor levels	ebi-a-GCST90027164	Amyotrophic lateral sclerosis || id:ebi-a-GCST90027164	90274793	Weighted mode	17	0.15728	0.113297	0.1841	1.17032	0.937272	1.46132	13.2523	15	0.582814	0.0128094	0.231948	0.242
346	Hepatocyte growth factor levels	ebi-a-GCST90027164	Amyotrophic lateral sclerosis || id:ebi-a-GCST90027164	90274791	MR Egger	29	-0.116199	0.098925	0.250405	0.890298	0.73338	1.08079	22.5039	27	0.711352	0.00610433	0.457838	0.84
347	Fms-related tyrosine kinase 3 ligand levels	ebi-a-GCST90027164	Amyotrophic lateral sclerosis || id:ebi-a-GCST90027164	90274791	Weighted median	29	-0.0435031	0.0459823	0.344106	0.95743	0.874915	1.04773	22.5039	27	0.711352	0.00610433	0.457838	0.84
348	Fms-related tyrosine kinase 3 ligand levels	ebi-a-GCST90027164	Amyotrophic lateral sclerosis || id:ebi-a-GCST90027164	90274791	Inverse variance weighted	29	-0.046103	0.03355	0.169393	0.954944	0.894169	1.01985	22.5039	27	0.711352	0.00610433	0.457838	0.84
349	Fms-related tyrosine kinase 3 ligand levels	ebi-a-GCST90027164	Amyotrophic lateral sclerosis || id:ebi-a-GCST90027164	90274791	Simple mode	29	-0.0150517	0.0891443	0.867131	0.985061	0.827146	1.17312	22.5039	27	0.711352	0.00610433	0.457838	0.84
350	Fms-related tyrosine kinase 3 ligand levels	ebi-a-GCST90027164	Amyotrophic lateral sclerosis || id:ebi-a-GCST90027164	90274791	Weighted mode	29	-0.0353386	0.0734992	0.634393	0.965279	0.835774	1.11485	22.5039	27	0.711352	0.00610433	0.457838	0.84
351	Fms-related tyrosine kinase 3 ligand levels	ebi-a-GCST90027164	Amyotrophic lateral sclerosis || id:ebi-a-GCST90027164	90274804	MR Egger	36	-0.0204821	0.0271328	0.455516	0.979726	0.928985	1.03324	48.7471	34	0.0485889	0.00510505	0.469633	0.266
352	interleukin-18 receptor 1 levels	ebi-a-GCST90027164	Amyotrophic lateral sclerosis || id:ebi-a-GCST90027164	90274804	Weighted median	36	0.00706223	0.0228007	0.75676	1.00709	0.963072	1.05311	48.7471	34	0.0485889	0.00510505	0.469633	0.266
353	interleukin-18 receptor 1 levels	ebi-a-GCST90027164	Amyotrophic lateral sclerosis || id:ebi-a-GCST90027164	90274804	Inverse variance weighted	36	-0.00508173	0.0169931	0.764905	0.994931	0.962339	1.02863	48.7471	34	0.0485889	0.00510505	0.469633	0.266
354	interleukin-18 receptor 1 levels	ebi-a-GCST90027164	Amyotrophic lateral sclerosis || id:ebi-a-GCST90027164	90274804	Simple mode	36	0.0431098	0.0453491	0.348316	1.04405	0.955257	1.1411	48.7471	34	0.0485889	0.00510505	0.469633	0.266
355	interleukin-18 receptor 1 levels	ebi-a-GCST90027164	Amyotrophic lateral sclerosis || id:ebi-a-GCST90027164	90274804	Weighted mode	36	-0.00300894	0.0161577	0.853345	0.996996	0.965916	1.02907	48.7471	34	0.0485889	0.00510505	0.469633	0.266
356	interleukin-18 receptor 1 levels	ebi-a-GCST90027164	Amyotrophic lateral sclerosis || id:ebi-a-GCST90027164	90274795	MR Egger	19	-0.131676	0.0931179	0.175393	0.876625	0.730383	1.05215	11.0615	17	0.853349	0.00291397	0.751465	0.056
357	Interleukin-10 levels	ebi-a-GCST90027164	Amyotrophic lateral sclerosis || id:ebi-a-GCST90027164	90274795	Weighted median	19	-0.0403643	0.0562976	0.473386	0.96044	0.860099	1.07249	11.0615	17	0.853349	0.00291397	0.751465	0.056
358	Interleukin-10 levels	ebi-a-GCST90027164	Amyotrophic lateral sclerosis || id:ebi-a-GCST90027164	90274795	Inverse variance weighted	19	-0.104794	0.0411867	0.0109479	0.90051	0.830673	0.97622	11.0615	17	0.853349	0.00291397	0.751465	0.056
359	Interleukin-10 levels	ebi-a-GCST90027164	Amyotrophic lateral sclerosis || id:ebi-a-GCST90027164	90274795	Simple mode	19	-0.247068	0.111714	0.0401674	0.781087	0.62749	0.972283	11.0615	17	0.853349	0.00291397	0.751465	0.056
360	Interleukin-10 levels	ebi-a-GCST90027164	Amyotrophic lateral sclerosis || id:ebi-a-GCST90027164	90274795	Weighted mode	19	-0.0043557	0.0821828	0.958316	0.995654	0.847526	1.16967	11.0615	17	0.853349	0.00291397	0.751465	0.056
361	Interleukin-10 levels	ebi-a-GCST90027164	Amyotrophic lateral sclerosis || id:ebi-a-GCST90027164	90274798	MR Egger	31	0.0198016	0.0683993	0.774259	1.02	0.892025	1.16633	49.3208	29	0.0106779	0.0029983	0.70312	1
362	Interleukin-12 subunit beta levels	ebi-a-GCST90027164	Amyotrophic lateral sclerosis || id:ebi-a-GCST90027164	90274798	Weighted median	31	0.0126784	0.0395142	0.748318	1.01276	0.937284	1.09431	49.3208	29	0.0106779	0.0029983	0.70312	1
363	Interleukin-12 subunit beta levels	ebi-a-GCST90027164	Amyotrophic lateral sclerosis || id:ebi-a-GCST90027164	90274798	Inverse variance weighted	31	0.043129	0.0312533	0.167592	1.04407	0.982036	1.11003	49.3208	29	0.0106779	0.0029983	0.70312	1
364	Interleukin-12 subunit beta levels	ebi-a-GCST90027164	Amyotrophic lateral sclerosis || id:ebi-a-GCST90027164	90274798	Simple mode	31	-0.00298317	0.0779459	0.969724	0.997021	0.855767	1.16159	49.3208	29	0.0106779	0.0029983	0.70312	1
365	Interleukin-12 subunit beta levels	ebi-a-GCST90027164	Amyotrophic lateral sclerosis || id:ebi-a-GCST90027164	90274798	Weighted mode	31	0.00614185	0.0406248	0.880842	1.00616	0.929152	1.08955	49.3208	29	0.0106779	0.0029983	0.70312	1
366	Interleukin-12 subunit beta levels	ebi-a-GCST90027164	Amyotrophic lateral sclerosis || id:ebi-a-GCST90027164	90274834	MR Egger	11	0.21063	0.110274	0.0884536	1.23446	0.994508	1.5323	7.69736	9	0.564909	-0.0174062	0.173411	0.946
367	SIR2-like protein 2 levels	ebi-a-GCST90027164	Amyotrophic lateral sclerosis || id:ebi-a-GCST90027164	90274834	Weighted median	11	0.125485	0.0789533	0.111979	1.1337	0.971161	1.32344	7.69736	9	0.564909	-0.0174062	0.173411	0.946
368	SIR2-like protein 2 levels	ebi-a-GCST90027164	Amyotrophic lateral sclerosis || id:ebi-a-GCST90027164	90274834	Inverse variance weighted	11	0.0702549	0.0560833	0.210319	1.07278	0.961108	1.19743	7.69736	9	0.564909	-0.0174062	0.173411	0.946
369	SIR2-like protein 2 levels	ebi-a-GCST90027164	Amyotrophic lateral sclerosis || id:ebi-a-GCST90027164	90274834	Simple mode	11	0.0604237	0.127269	0.645148	1.06229	0.827767	1.36325	7.69736	9	0.564909	-0.0174062	0.173411	0.946
370	SIR2-like protein 2 levels	ebi-a-GCST90027164	Amyotrophic lateral sclerosis || id:ebi-a-GCST90027164	90274834	Weighted mode	11	0.186261	0.103024	0.100741	1.20474	0.984456	1.47431	7.69736	9	0.564909	-0.0174062	0.173411	0.946
371	SIR2-like protein 2 levels	ebi-a-GCST90027164	Amyotrophic lateral sclerosis || id:ebi-a-GCST90027164	90274825	MR Egger	13	0.0370203	0.0480663	0.457408	1.03771	0.944415	1.14023	12.9932	11	0.293773	-0.0126228	0.0947844	0.385
372	Macrophage inflammatory protein 1a levels	ebi-a-GCST90027164	Amyotrophic lateral sclerosis || id:ebi-a-GCST90027164	90274825	Weighted median	13	-0.00206412	0.0340189	0.951618	0.997938	0.933568	1.06675	12.9932	11	0.293773	-0.0126228	0.0947844	0.385
373	Macrophage inflammatory protein 1a levels	ebi-a-GCST90027164	Amyotrophic lateral sclerosis || id:ebi-a-GCST90027164	90274825	Inverse variance weighted	13	-0.0284324	0.0350549	0.41732	0.971968	0.907429	1.0411	12.9932	11	0.293773	-0.0126228	0.0947844	0.385
374	Macrophage inflammatory protein 1a levels	ebi-a-GCST90027164	Amyotrophic lateral sclerosis || id:ebi-a-GCST90027164	90274825	Simple mode	13	0.0542146	0.0949183	0.578424	1.05571	0.876494	1.27157	12.9932	11	0.293773	-0.0126228	0.0947844	0.385
375	Macrophage inflammatory protein 1a levels	ebi-a-GCST90027164	Amyotrophic lateral sclerosis || id:ebi-a-GCST90027164	90274825	Weighted mode	13	0.00445512	0.0345883	0.899646	1.00447	0.938626	1.07492	12.9932	11	0.293773	-0.0126228	0.0947844	0.385
376	Macrophage inflammatory protein 1a levels	ebi-a-GCST90027164	Amyotrophic lateral sclerosis || id:ebi-a-GCST90027164	90274777	MR Egger	38	-0.0419855	0.033749	0.22152	0.958884	0.897508	1.02446	40.2172	36	0.288847	0.0080034	0.057489	0.709
377	Cystatin D levels	ebi-a-GCST90027164	Amyotrophic lateral sclerosis || id:ebi-a-GCST90027164	90274777	Weighted median	38	0.01194	0.0309427	0.69959	1.01201	0.952459	1.07529	40.2172	36	0.288847	0.0080034	0.057489	0.709
378	Cystatin D levels	ebi-a-GCST90027164	Amyotrophic lateral sclerosis || id:ebi-a-GCST90027164	90274777	Inverse variance weighted	38	0.00928538	0.02217	0.675342	1.00933	0.966409	1.05415	40.2172	36	0.288847	0.0080034	0.057489	0.709
379	Cystatin D levels	ebi-a-GCST90027164	Amyotrophic lateral sclerosis || id:ebi-a-GCST90027164	90274777	Simple mode	38	0.000628344	0.0641602	0.992239	1.00063	0.882386	1.13472	40.2172	36	0.288847	0.0080034	0.057489	0.709
380	Cystatin D levels	ebi-a-GCST90027164	Amyotrophic lateral sclerosis || id:ebi-a-GCST90027164	90274777	Weighted mode	38	0.0114625	0.0268655	0.672098	1.01153	0.959643	1.06622	40.2172	36	0.288847	0.0080034	0.057489	0.709
381	Cystatin D levels	ebi-a-GCST90027164	Amyotrophic lateral sclerosis || id:ebi-a-GCST90027164	90274806	MR Egger	13	-0.05529	0.126724	0.671058	0.946211	0.738105	1.21299	8.28071	11	0.68796	0.00441037	0.75011	0.496
382	Interleukin-2 levels	ebi-a-GCST90027164	Amyotrophic lateral sclerosis || id:ebi-a-GCST90027164	90274806	Weighted median	13	-0.0991738	0.072274	0.170004	0.905585	0.785975	1.0434	8.28071	11	0.68796	0.00441037	0.75011	0.496
383	Interleukin-2 levels	ebi-a-GCST90027164	Amyotrophic lateral sclerosis || id:ebi-a-GCST90027164	90274806	Inverse variance weighted	13	-0.0175186	0.051797	0.7352	0.982634	0.887772	1.08763	8.28071	11	0.68796	0.00441037	0.75011	0.496
384	Interleukin-2 levels	ebi-a-GCST90027164	Amyotrophic lateral sclerosis || id:ebi-a-GCST90027164	90274806	Simple mode	13	-0.128566	0.12658	0.329819	0.879355	0.686147	1.12697	8.28071	11	0.68796	0.00441037	0.75011	0.496
385	Interleukin-2 levels	ebi-a-GCST90027164	Amyotrophic lateral sclerosis || id:ebi-a-GCST90027164	90274806	Weighted mode	13	-0.130495	0.119979	0.298116	0.877661	0.693743	1.11034	8.28071	11	0.68796	0.00441037	0.75011	0.496
386	Interleukin-2 levels	ebi-a-GCST90027164	Amyotrophic lateral sclerosis || id:ebi-a-GCST90027164	90274822	MR Egger	31	-0.00321011	0.0204472	0.876336	0.996795	0.957637	1.03755	22.3428	29	0.805722	-0.00302189	0.532945	0.022
387	Monocyte chemoattractant protein 2 levels	ebi-a-GCST90027164	Amyotrophic lateral sclerosis || id:ebi-a-GCST90027164	90274822	Weighted median	31	-0.00122148	0.0216887	0.955088	0.998779	0.957211	1.04215	22.3428	29	0.805722	-0.00302189	0.532945	0.022
388	Monocyte chemoattractant protein 2 levels	ebi-a-GCST90027164	Amyotrophic lateral sclerosis || id:ebi-a-GCST90027164	90274822	Inverse variance weighted	31	-0.0115667	0.0155798	0.457837	0.9885	0.958771	1.01915	22.3428	29	0.805722	-0.00302189	0.532945	0.022
389	Monocyte chemoattractant protein 2 levels	ebi-a-GCST90027164	Amyotrophic lateral sclerosis || id:ebi-a-GCST90027164	90274822	Simple mode	31	-0.0131232	0.0462192	0.778412	0.986963	0.901484	1.08055	22.3428	29	0.805722	-0.00302189	0.532945	0.022
390	Monocyte chemoattractant protein 2 levels	ebi-a-GCST90027164	Amyotrophic lateral sclerosis || id:ebi-a-GCST90027164	90274822	Weighted mode	31	-0.0131232	0.0195101	0.506328	0.986963	0.949934	1.02543	22.3428	29	0.805722	-0.00302189	0.532945	0.022
391	Monocyte chemoattractant protein 2 levels	ebi-a-GCST90027164	Amyotrophic lateral sclerosis || id:ebi-a-GCST90027164	90274802	MR Egger	17	0.139964	0.119508	0.259798	1.15023	0.910036	1.45383	8.82388	15	0.886545	-0.0135659	0.259265	0.586
392	Interleukin-17C levels	ebi-a-GCST90027164	Amyotrophic lateral sclerosis || id:ebi-a-GCST90027164	90274802	Weighted median	17	-0.0171986	0.0593469	0.77197	0.982948	0.875011	1.1042	8.82388	15	0.886545	-0.0135659	0.259265	0.586
393	Interleukin-17C levels	ebi-a-GCST90027164	Amyotrophic lateral sclerosis || id:ebi-a-GCST90027164	90274802	Inverse variance weighted	17	0.00883249	0.0421302	0.833943	1.00887	0.928911	1.09572	8.82388	15	0.886545	-0.0135659	0.259265	0.586
394	Interleukin-17C levels	ebi-a-GCST90027164	Amyotrophic lateral sclerosis || id:ebi-a-GCST90027164	90274802	Simple mode	17	-0.0236863	0.105713	0.825544	0.976592	0.793832	1.20143	8.82388	15	0.886545	-0.0135659	0.259265	0.586
395	Interleukin-17C levels	ebi-a-GCST90027164	Amyotrophic lateral sclerosis || id:ebi-a-GCST90027164	90274802	Weighted mode	17	-0.0327803	0.111777	0.77309	0.967751	0.777351	1.20479	8.82388	15	0.886545	-0.0135659	0.259265	0.586
396	Interleukin-17C levels	ebi-a-GCST90027164	Amyotrophic lateral sclerosis || id:ebi-a-GCST90027164	90274775	MR Egger	27	-0.0347915	0.0548627	0.53174	0.965807	0.867342	1.07545	28.1368	25	0.301592	0.00293386	0.626248	0.568
397	CUB domain-containing protein 1 levels	ebi-a-GCST90027164	Amyotrophic lateral sclerosis || id:ebi-a-GCST90027164	90274775	Weighted median	27	-0.0130761	0.0423403	0.757449	0.987009	0.908407	1.07241	28.1368	25	0.301592	0.00293386	0.626248	0.568
398	CUB domain-containing protein 1 levels	ebi-a-GCST90027164	Amyotrophic lateral sclerosis || id:ebi-a-GCST90027164	90274775	Inverse variance weighted	27	-0.0120824	0.0293779	0.680871	0.98799	0.932708	1.04655	28.1368	25	0.301592	0.00293386	0.626248	0.568
399	CUB domain-containing protein 1 levels	ebi-a-GCST90027164	Amyotrophic lateral sclerosis || id:ebi-a-GCST90027164	90274775	Simple mode	27	-0.104905	0.0712927	0.153167	0.90041	0.782988	1.03544	28.1368	25	0.301592	0.00293386	0.626248	0.568
400	CUB domain-containing protein 1 levels	ebi-a-GCST90027164	Amyotrophic lateral sclerosis || id:ebi-a-GCST90027164	90274775	Weighted mode	27	-0.0517075	0.0391081	0.197626	0.949607	0.879537	1.02526	28.1368	25	0.301592	0.00293386	0.626248	0.568
401	CUB domain-containing protein 1 levels	ebi-a-GCST90027164	Amyotrophic lateral sclerosis || id:ebi-a-GCST90027164	90274831	MR Egger	14	-0.0930274	0.125831	0.473938	0.911169	0.712015	1.16603	11.8315	12	0.459306	0.00385118	0.753261	0.856
402	Oncostatin-M levels	ebi-a-GCST90027164	Amyotrophic lateral sclerosis || id:ebi-a-GCST90027164	90274831	Weighted median	14	-0.120514	0.0654416	0.0655408	0.886465	0.779752	1.00778	11.8315	12	0.459306	0.00385118	0.753261	0.856
403	Oncostatin-M levels	ebi-a-GCST90027164	Amyotrophic lateral sclerosis || id:ebi-a-GCST90027164	90274831	Inverse variance weighted	14	-0.0556134	0.0479825	0.246441	0.945905	0.861001	1.03918	11.8315	12	0.459306	0.00385118	0.753261	0.856
404	Oncostatin-M levels	ebi-a-GCST90027164	Amyotrophic lateral sclerosis || id:ebi-a-GCST90027164	90274831	Simple mode	14	-0.111583	0.123587	0.383023	0.894418	0.702006	1.13957	11.8315	12	0.459306	0.00385118	0.753261	0.856
405	Oncostatin-M levels	ebi-a-GCST90027164	Amyotrophic lateral sclerosis || id:ebi-a-GCST90027164	90274831	Weighted mode	14	-0.129893	0.0859494	0.15464	0.878189	0.742039	1.03932	11.8315	12	0.459306	0.00385118	0.753261	0.856
406	Oncostatin-M levels	ebi-a-GCST90027164	Amyotrophic lateral sclerosis || id:ebi-a-GCST90027164	90274801	MR Egger	12	0.167673	0.128053	0.219682	1.18255	0.920066	1.51992	7.96732	10	0.632029	-0.0153913	0.240464	0.065
407	Interleukin-17A levels	ebi-a-GCST90027164	Amyotrophic lateral sclerosis || id:ebi-a-GCST90027164	90274801	Weighted median	12	0.0517653	0.0724317	0.474808	1.05313	0.913748	1.21377	7.96732	10	0.632029	-0.0153913	0.240464	0.065
408	Interleukin-17A levels	ebi-a-GCST90027164	Amyotrophic lateral sclerosis || id:ebi-a-GCST90027164	90274801	Inverse variance weighted	12	0.0218584	0.0524029	0.676589	1.0221	0.922331	1.13266	7.96732	10	0.632029	-0.0153913	0.240464	0.065
409	Interleukin-17A levels	ebi-a-GCST90027164	Amyotrophic lateral sclerosis || id:ebi-a-GCST90027164	90274801	Simple mode	12	0.0677941	0.119484	0.581844	1.07014	0.846711	1.35254	7.96732	10	0.632029	-0.0153913	0.240464	0.065
410	Interleukin-17A levels	ebi-a-GCST90027164	Amyotrophic lateral sclerosis || id:ebi-a-GCST90027164	90274801	Weighted mode	12	0.0814903	0.117514	0.502405	1.0849	0.86171	1.3659	7.96732	10	0.632029	-0.0153913	0.240464	0.065
411	Interleukin-17A levels	ebi-a-GCST90027164	Amyotrophic lateral sclerosis || id:ebi-a-GCST90027164	90274790	MR Egger	24	0.0325742	0.0463281	0.489356	1.03311	0.943434	1.13131	40.7934	22	0.00872019	-0.000570578	0.943243	0.497
412	Fibroblast growth factor 5 levels	ebi-a-GCST90027164	Amyotrophic lateral sclerosis || id:ebi-a-GCST90027164	90274790	Weighted median	24	0.0370245	0.0272031	0.173501	1.03772	0.983838	1.09455	40.7934	22	0.00872019	-0.000570578	0.943243	0.497
413	Fibroblast growth factor 5 levels	ebi-a-GCST90027164	Amyotrophic lateral sclerosis || id:ebi-a-GCST90027164	90274790	Inverse variance weighted	24	0.0300461	0.0295687	0.30956	1.0305	0.972477	1.09199	40.7934	22	0.00872019	-0.000570578	0.943243	0.497
414	Fibroblast growth factor 5 levels	ebi-a-GCST90027164	Amyotrophic lateral sclerosis || id:ebi-a-GCST90027164	90274790	Simple mode	24	0.138547	0.100974	0.183266	1.1486	0.942365	1.39998	40.7934	22	0.00872019	-0.000570578	0.943243	0.497
415	Fibroblast growth factor 5 levels	ebi-a-GCST90027164	Amyotrophic lateral sclerosis || id:ebi-a-GCST90027164	90274790	Weighted mode	24	0.039254	0.0270924	0.160864	1.04003	0.986248	1.09675	40.7934	22	0.00872019	-0.000570578	0.943243	0.497
416	Fibroblast growth factor 5 levels	ebi-a-GCST90027164	Amyotrophic lateral sclerosis || id:ebi-a-GCST90027164	90274826	MR Egger	27	0.0561337	0.0594985	0.354481	1.05774	0.941309	1.18857	35.0169	25	0.0878978	-0.00951213	0.183769	0.298
417	Matrix metalloproteinase-1 levels	ebi-a-GCST90027164	Amyotrophic lateral sclerosis || id:ebi-a-GCST90027164	90274826	Weighted median	27	0.0338269	0.0446379	0.448567	1.03441	0.947751	1.12898	35.0169	25	0.0878978	-0.00951213	0.183769	0.298
418	Matrix metalloproteinase-1 levels	ebi-a-GCST90027164	Amyotrophic lateral sclerosis || id:ebi-a-GCST90027164	90274826	Inverse variance weighted	27	-0.0118216	0.0332395	0.722103	0.988248	0.925917	1.05478	35.0169	25	0.0878978	-0.00951213	0.183769	0.298
419	Matrix metalloproteinase-1 levels	ebi-a-GCST90027164	Amyotrophic lateral sclerosis || id:ebi-a-GCST90027164	90274826	Simple mode	27	0.066736	0.101763	0.517714	1.06901	0.875711	1.30498	35.0169	25	0.0878978	-0.00951213	0.183769	0.298
420	Matrix metalloproteinase-1 levels	ebi-a-GCST90027164	Amyotrophic lateral sclerosis || id:ebi-a-GCST90027164	90274826	Weighted mode	27	0.0966307	0.0652314	0.150531	1.10145	0.969259	1.25168	35.0169	25	0.0878978	-0.00951213	0.183769	0.298
421	Matrix metalloproteinase-1 levels	ebi-a-GCST90027164	Amyotrophic lateral sclerosis || id:ebi-a-GCST90027164	90274784	MR Egger	20	0.103859	0.108485	0.351068	1.10944	0.896936	1.3723	21.6864	18	0.246204	-0.00982438	0.329024	0.262
422	C-X-C motif chemokine 9 levels	ebi-a-GCST90027164	Amyotrophic lateral sclerosis || id:ebi-a-GCST90027164	90274784	Weighted median	20	-0.0183137	0.0629488	0.771105	0.981853	0.867887	1.11078	21.6864	18	0.246204	-0.00982438	0.329024	0.262
423	C-X-C motif chemokine 9 levels	ebi-a-GCST90027164	Amyotrophic lateral sclerosis || id:ebi-a-GCST90027164	90274784	Inverse variance weighted	20	0.00436063	0.0439806	0.92102	1.00437	0.921418	1.09479	21.6864	18	0.246204	-0.00982438	0.329024	0.262
424	C-X-C motif chemokine 9 levels	ebi-a-GCST90027164	Amyotrophic lateral sclerosis || id:ebi-a-GCST90027164	90274784	Simple mode	20	0.11119	0.109661	0.323348	1.11761	0.901455	1.38559	21.6864	18	0.246204	-0.00982438	0.329024	0.262
425	C-X-C motif chemokine 9 levels	ebi-a-GCST90027164	Amyotrophic lateral sclerosis || id:ebi-a-GCST90027164	90274784	Weighted mode	20	0.0255384	0.0793185	0.750989	1.02587	0.87816	1.19842	21.6864	18	0.246204	-0.00982438	0.329024	0.262
426	C-X-C motif chemokine 9 levels	ebi-a-GCST90027164	Amyotrophic lateral sclerosis || id:ebi-a-GCST90027164	90274821	MR Egger	22	-0.009689	0.0620167	0.877416	0.990358	0.877006	1.11836	18.7442	20	0.538506	0.00343749	0.666851	0.185
427	Monocyte chemoattractant protein-1 levels	ebi-a-GCST90027164	Amyotrophic lateral sclerosis || id:ebi-a-GCST90027164	90274821	Weighted median	22	0.0174507	0.0431548	0.685938	1.0176	0.935071	1.10742	18.7442	20	0.538506	0.00343749	0.666851	0.185
428	Monocyte chemoattractant protein-1 levels	ebi-a-GCST90027164	Amyotrophic lateral sclerosis || id:ebi-a-GCST90027164	90274821	Inverse variance weighted	22	0.0136449	0.0315264	0.665153	1.01374	0.952994	1.07835	18.7442	20	0.538506	0.00343749	0.666851	0.185
429	Monocyte chemoattractant protein-1 levels	ebi-a-GCST90027164	Amyotrophic lateral sclerosis || id:ebi-a-GCST90027164	90274821	Simple mode	22	0.0222407	0.0701662	0.754395	1.02249	0.891112	1.17324	18.7442	20	0.538506	0.00343749	0.666851	0.185
430	Monocyte chemoattractant protein-1 levels	ebi-a-GCST90027164	Amyotrophic lateral sclerosis || id:ebi-a-GCST90027164	90274821	Weighted mode	22	0.0276221	0.0469522	0.562604	1.02801	0.937626	1.1271	18.7442	20	0.538506	0.00343749	0.666851	0.185
431	Monocyte chemoattractant protein-1 levels	ebi-a-GCST90027164	Amyotrophic lateral sclerosis || id:ebi-a-GCST90027164	90274827	MR Egger	21	0.0232702	0.0299984	0.447466	1.02354	0.965097	1.08553	16.9208	19	0.595233	0.000376986	0.945597	0.114
432	Matrix metalloproteinase-10 levels	ebi-a-GCST90027164	Amyotrophic lateral sclerosis || id:ebi-a-GCST90027164	90274827	Weighted median	21	0.0209916	0.0278695	0.451324	1.02121	0.966927	1.07855	16.9208	19	0.595233	0.000376986	0.945597	0.114
433	Matrix metalloproteinase-10 levels	ebi-a-GCST90027164	Amyotrophic lateral sclerosis || id:ebi-a-GCST90027164	90274827	Inverse variance weighted	21	0.0247141	0.0215365	0.251156	1.02502	0.982655	1.06922	16.9208	19	0.595233	0.000376986	0.945597	0.114
434	Matrix metalloproteinase-10 levels	ebi-a-GCST90027164	Amyotrophic lateral sclerosis || id:ebi-a-GCST90027164	90274827	Simple mode	21	0.00683986	0.0545571	0.901482	1.00686	0.904754	1.1205	16.9208	19	0.595233	0.000376986	0.945597	0.114
435	Matrix metalloproteinase-10 levels	ebi-a-GCST90027164	Amyotrophic lateral sclerosis || id:ebi-a-GCST90027164	90274827	Weighted mode	21	0.0258281	0.0270086	0.350342	1.02616	0.973255	1.08195	16.9208	19	0.595233	0.000376986	0.945597	0.114
436	Matrix metalloproteinase-10 levels	ebi-a-GCST90027164	Amyotrophic lateral sclerosis || id:ebi-a-GCST90027164	90274808	MR Egger	7	-0.0162444	0.143519	0.914287	0.983887	0.742641	1.3035	2.21117	5	0.819221	-0.00134722	0.925698	0.017
437	Interleukin-20 receptor subunit alpha levels	ebi-a-GCST90027164	Amyotrophic lateral sclerosis || id:ebi-a-GCST90027164	90274808	Weighted median	7	-0.0103565	0.0785	0.89504	0.989697	0.848558	1.15431	2.21117	5	0.819221	-0.00134722	0.925698	0.017
438	Interleukin-20 receptor subunit alpha levels	ebi-a-GCST90027164	Amyotrophic lateral sclerosis || id:ebi-a-GCST90027164	90274808	Inverse variance weighted	7	-0.0288374	0.0640639	0.652613	0.971574	0.856927	1.10156	2.21117	5	0.819221	-0.00134722	0.925698	0.017
439	Interleukin-20 receptor subunit alpha levels	ebi-a-GCST90027164	Amyotrophic lateral sclerosis || id:ebi-a-GCST90027164	90274808	Simple mode	7	-0.0073944	0.114789	0.950731	0.992633	0.792643	1.24308	2.21117	5	0.819221	-0.00134722	0.925698	0.017
440	Interleukin-20 receptor subunit alpha levels	ebi-a-GCST90027164	Amyotrophic lateral sclerosis || id:ebi-a-GCST90027164	90274808	Weighted mode	7	-0.00878579	0.115548	0.941863	0.991253	0.790365	1.2432	2.21117	5	0.819221	-0.00134722	0.925698	0.017
441	Interleukin-20 receptor subunit alpha levels	ebi-a-GCST90027164	Amyotrophic lateral sclerosis || id:ebi-a-GCST90027164	90274780	MR Egger	23	0.0789949	0.0580475	0.187983	1.0822	0.96582	1.2126	15.7061	21	0.785929	-0.0141098	0.0246611	0.32
442	C-X-C motif chemokine 10 levels	ebi-a-GCST90027164	Amyotrophic lateral sclerosis || id:ebi-a-GCST90027164	90274780	Weighted median	23	0.00187703	0.0499122	0.970001	1.00188	0.908509	1.10484	15.7061	21	0.785929	-0.0141098	0.0246611	0.32
443	C-X-C motif chemokine 10 levels	ebi-a-GCST90027164	Amyotrophic lateral sclerosis || id:ebi-a-GCST90027164	90274780	Inverse variance weighted	23	-0.0349982	0.0339279	0.302285	0.965607	0.903484	1.032	15.7061	21	0.785929	-0.0141098	0.0246611	0.32
444	C-X-C motif chemokine 10 levels	ebi-a-GCST90027164	Amyotrophic lateral sclerosis || id:ebi-a-GCST90027164	90274780	Simple mode	23	-0.0133816	0.0914036	0.884938	0.986708	0.824867	1.1803	15.7061	21	0.785929	-0.0141098	0.0246611	0.32
445	C-X-C motif chemokine 10 levels	ebi-a-GCST90027164	Amyotrophic lateral sclerosis || id:ebi-a-GCST90027164	90274780	Weighted mode	23	0.0364122	0.064164	0.57613	1.03708	0.914526	1.17606	15.7061	21	0.785929	-0.0141098	0.0246611	0.32
446	C-X-C motif chemokine 10 levels	ebi-a-GCST90027164	Amyotrophic lateral sclerosis || id:ebi-a-GCST90027164	90274848	MR Egger	27	0.0140906	0.0397264	0.725795	1.01419	0.938218	1.09631	25.3231	25	0.44439	-0.00171243	0.753324	0.001
447	Vascular endothelial growth factor A levels	ebi-a-GCST90027164	Amyotrophic lateral sclerosis || id:ebi-a-GCST90027164	90274848	Weighted median	27	0.0103294	0.03047	0.734609	1.01038	0.951808	1.07256	25.3231	25	0.44439	-0.00171243	0.753324	0.001
448	Vascular endothelial growth factor A levels	ebi-a-GCST90027164	Amyotrophic lateral sclerosis || id:ebi-a-GCST90027164	90274848	Inverse variance weighted	27	0.00389444	0.0232681	0.867077	1.0039	0.959147	1.05075	25.3231	25	0.44439	-0.00171243	0.753324	0.001
449	Vascular endothelial growth factor A levels	ebi-a-GCST90027164	Amyotrophic lateral sclerosis || id:ebi-a-GCST90027164	90274848	Simple mode	27	0.0360253	0.0646961	0.582399	1.03668	0.91322	1.17684	25.3231	25	0.44439	-0.00171243	0.753324	0.001
450	Vascular endothelial growth factor A levels	ebi-a-GCST90027164	Amyotrophic lateral sclerosis || id:ebi-a-GCST90027164	90274848	Weighted mode	27	0.0126848	0.0304007	0.679918	1.01277	0.954182	1.07495	25.3231	25	0.44439	-0.00171243	0.753324	0.001
451	Vascular endothelial growth factor A levels	ebi-a-GCST90027164	Amyotrophic lateral sclerosis || id:ebi-a-GCST90027164	90274820	MR Egger	12	-0.141594	0.0586787	0.0364928	0.867973	0.773674	0.973766	10.6132	10	0.388433	0.0137154	0.121096	0.236
452	Leukemia inhibitory factor receptor levels	ebi-a-GCST90027164	Amyotrophic lateral sclerosis || id:ebi-a-GCST90027164	90274820	Weighted median	12	-0.0799139	0.0433752	0.0654187	0.923196	0.847954	1.00511	10.6132	10	0.388433	0.0137154	0.121096	0.236
453	Leukemia inhibitory factor receptor levels	ebi-a-GCST90027164	Amyotrophic lateral sclerosis || id:ebi-a-GCST90027164	90274820	Inverse variance weighted	12	-0.0614158	0.037524	0.101692	0.940432	0.873748	1.01221	10.6132	10	0.388433	0.0137154	0.121096	0.236
454	Leukemia inhibitory factor receptor levels	ebi-a-GCST90027164	Amyotrophic lateral sclerosis || id:ebi-a-GCST90027164	90274820	Simple mode	12	0.062527	0.0917609	0.509702	1.06452	0.889297	1.27428	10.6132	10	0.388433	0.0137154	0.121096	0.236
455	Leukemia inhibitory factor receptor levels	ebi-a-GCST90027164	Amyotrophic lateral sclerosis || id:ebi-a-GCST90027164	90274820	Weighted mode	12	-0.0876447	0.0476673	0.0930915	0.916086	0.834375	1.0058	10.6132	10	0.388433	0.0137154	0.121096	0.236
456	Leukemia inhibitory factor receptor levels

## Sheet: S6
Results of Reverse Mendelian Randomization Analysis between 91 inflammatory proteins and ALS
Select snp p_value < 5e-8, clump_kb = 5000, clump_r2 = 0.01
	id.exposure	id.outcome	outcome	exposure	method	nsnp	b	se	pval	OR	lower	upper	Q	Q_df	Q_pval(MR Egger)	egger_intercept	pval(egger_intercept)	p mr_presso
1	Amyotrophic lateral sclerosis	Eukaryotic translation initiation factor 4E-binding protein 1 levels	90274758	|| id:ebi-a-GCST90027164	MR Egger	14	-0.040706	0.0761404	0.602679	0.960111	0.827008	1.11464	11.7679	12	0.464492	0.00358334	0.687931	0.514
2	Amyotrophic lateral sclerosis	Eukaryotic translation initiation factor 4E-binding protein 1 levels	90274758	|| id:ebi-a-GCST90027164	Weighted median	14	-0.0147384	0.0531084	0.781385	0.98537	0.887958	1.09347	11.7679	12	0.464492	0.00358334	0.687931	0.514
3	Amyotrophic lateral sclerosis	Eukaryotic translation initiation factor 4E-binding protein 1 levels	90274758	|| id:ebi-a-GCST90027164	Inverse variance weighted	14	-0.0132185	0.0365546	0.717643	0.986868	0.918636	1.06017	11.7679	12	0.464492	0.00358334	0.687931	0.514
4	Amyotrophic lateral sclerosis	Eukaryotic translation initiation factor 4E-binding protein 1 levels	90274758	|| id:ebi-a-GCST90027164	Simple mode	14	-0.011387	0.0886113	0.899716	0.988678	0.83105	1.1762	11.7679	12	0.464492	0.00358334	0.687931	0.514
5	Amyotrophic lateral sclerosis	Eukaryotic translation initiation factor 4E-binding protein 1 levels	90274758	|| id:ebi-a-GCST90027164	Weighted mode	14	-0.0218838	0.0751957	0.775624	0.978354	0.844283	1.13371	11.7679	12	0.464492	0.00358334	0.687931	0.514
6	Amyotrophic lateral sclerosis	Adenosine Deaminase levels	90274759	|| id:ebi-a-GCST90027164	MR Egger	14	0.0263622	0.0816781	0.752433	1.02671	0.874829	1.20497	14.1759	12	0.289615	-0.00400676	0.675339	0.266
7	Amyotrophic lateral sclerosis	Adenosine Deaminase levels	90274759	|| id:ebi-a-GCST90027164	Weighted median	14	-0.00028145	3	0.995888	0.999719	0.898231	1.11267	14.1759	12	0.289615	-0.00400676	0.675339	0.266
8	Amyotrophic lateral sclerosis	Adenosine Deaminase levels	90274759	|| id:ebi-a-GCST90027164	Inverse variance weighted	14	-0.00444455	0.0377542	0.906287	0.995565	0.924555	1.07203	14.1759	12	0.289615	-0.00400676	0.675339	0.266
9	Amyotrophic lateral sclerosis	Adenosine Deaminase levels	90274759	|| id:ebi-a-GCST90027164	Simple mode	14	0.0163976	0.112661	0.886511	1.01653	0.815121	1.26771	14.1759	12	0.289615	-0.00400676	0.675339	0.266
10	Amyotrophic lateral sclerosis	Adenosine Deaminase levels	90274759	|| id:ebi-a-GCST90027164	Weighted mode	14	-0.132576	0.092902	0.17714	0.875836	0.730034	1.05076	14.1759	12	0.289615	-0.00400676	0.675339	0.266
11	Amyotrophic lateral sclerosis	Artemin levels	90274760	|| id:ebi-a-GCST90027164	MR Egger	14	-0.0426832	0.0856669	0.627317	0.958215	0.810106	1.1334	12.364	12	0.416906	0.0127292	0.219532	0.389
12	Amyotrophic lateral sclerosis	Artemin levels	90274760	|| id:ebi-a-GCST90027164	Weighted median	14	0.044272	0.0570796	0.437974	1.04527	0.934631	1.169	12.364	12	0.416906	0.0127292	0.219532	0.389
13	Amyotrophic lateral sclerosis	Artemin levels	90274760	|| id:ebi-a-GCST90027164	Inverse variance weighted	14	0.0547267	0.042102	0.193648	1.05625	0.97259	1.14711	12.364	12	0.416906	0.0127292	0.219532	0.389
14	Amyotrophic lateral sclerosis	Artemin levels	90274760	|| id:ebi-a-GCST90027164	Simple mode	14	0.189743	0.101664	0.0847065	1.20894	0.990526	1.47551	12.364	12	0.416906	0.0127292	0.219532	0.389
15	Amyotrophic lateral sclerosis	Artemin levels	90274760	|| id:ebi-a-GCST90027164	Weighted mode	14	0.0499031	0.0746265	0.515383	1.05117	0.908133	1.21673	12.364	12	0.416906	0.0127292	0.219532	0.389
16	Amyotrophic lateral sclerosis	Axin-1 levels	90274761	|| id:ebi-a-GCST90027164	MR Egger	14	-0.0557338	0.0847717	0.523298	0.945791	0.801006	1.11675	6.85837	12	0.86683	0.000370385	0.970248	0.906
17	Amyotrophic lateral sclerosis	Axin-1 levels	90274761	|| id:ebi-a-GCST90027164	Weighted median	14	-0.0247177	0.0559414	0.658599	0.975585	0.874273	1.08864	6.85837	12	0.86683	0.000370385	0.970248	0.906
18	Amyotrophic lateral sclerosis	Axin-1 levels	90274761	|| id:ebi-a-GCST90027164	Inverse variance weighted	14	-0.0529024	0.0407261	0.19395	0.948473	0.875705	1.02729	6.85837	12	0.86683	0.000370385	0.970248	0.906
19	Amyotrophic lateral sclerosis	Axin-1 levels	90274761	|| id:ebi-a-GCST90027164	Simple mode	14	-0.159532	0.0993109	0.132194	0.852543	0.701748	1.03574	6.85837	12	0.86683	0.000370385	0.970248	0.906
20	Amyotrophic lateral sclerosis	Axin-1 levels	90274761	|| id:ebi-a-GCST90027164	Weighted mode	14	0.0287325	0.0719281	0.696039	1.02915	0.893824	1.18496	6.85837	12	0.86683	0.000370385	0.970248	0.906
21	Amyotrophic lateral sclerosis	beta-nerve growth factor levels	90274762	|| id:ebi-a-GCST90027164	MR Egger	14	0.0864805	0.11791	0.477373	1.09033	0.865348	1.37381	30.9012	12	0.00203953	-0.00389364	0.777259	0.003
22	Amyotrophic lateral sclerosis	beta-nerve growth factor levels	90274762	|| id:ebi-a-GCST90027164	Weighted median	14	0.0234119	0.0529719	0.658511	1.02369	0.922735	1.13569	30.9012	12	0.00203953	-0.00389364	0.777259	0.003
23	Amyotrophic lateral sclerosis	beta-nerve growth factor levels	90274762	|| id:ebi-a-GCST90027164	Inverse variance weighted	14	0.0564645	0.0540328	0.296021	1.05809	0.951762	1.17629	30.9012	12	0.00203953	-0.00389364	0.777259	0.003
24	Amyotrophic lateral sclerosis	beta-nerve growth factor levels	90274762	|| id:ebi-a-GCST90027164	Simple mode	14	-0.029379	0.0874492	0.742265	0.971048	0.818093	1.1526	30.9012	12	0.00203953	-0.00389364	0.777259	0.003
25	Amyotrophic lateral sclerosis	beta-nerve growth factor levels	90274762	|| id:ebi-a-GCST90027164	Weighted mode	14	0.00810159	0.0721488	0.912309	1.00813	0.875194	1.16127	30.9012	12	0.00203953	-0.00389364	0.777259	0.003
26	Amyotrophic lateral sclerosis	Caspase 8 levels	90274763	|| id:ebi-a-GCST90027164	MR Egger	14	-0.103639	0.0759681	0.197531	0.901551	0.776828	1.0463	10.2839	12	0.591074	0.0127308	0.168099	0.496
27	Amyotrophic lateral sclerosis	Caspase 8 levels	90274763	|| id:ebi-a-GCST90027164	Weighted median	14	-0.0240897	0.0525135	0.646426	0.976198	0.880719	1.08203	10.2839	12	0.591074	0.0127308	0.168099	0.496
28	Amyotrophic lateral sclerosis	Caspase 8 levels	90274763	|| id:ebi-a-GCST90027164	Inverse variance weighted	14	-0.00586272	0.0364504	0.872219	0.994154	0.925607	1.06778	10.2839	12	0.591074	0.0127308	0.168099	0.496
29	Amyotrophic lateral sclerosis	Caspase 8 levels	90274763	|| id:ebi-a-GCST90027164	Simple mode	14	-0.0561534	0.0865016	0.527538	0.945394	0.79796	1.12007	10.2839	12	0.591074	0.0127308	0.168099	0.496
30	Amyotrophic lateral sclerosis	Caspase 8 levels	90274763	|| id:ebi-a-GCST90027164	Weighted mode	14	-0.0404683	0.0750751	0.598972	0.96034	0.828933	1.11258	10.2839	12	0.591074	0.0127308	0.168099	0.496
31	Amyotrophic lateral sclerosis	Eotaxin levels	90274764	|| id:ebi-a-GCST90027164	MR Egger	14	0.00644411	0.0845667	0.940514	1.00646	0.852735	1.18791	15.304	12	0.225233	0.00646771	0.516443	0.262
32	Amyotrophic lateral sclerosis	Eotaxin levels	90274764	|| id:ebi-a-GCST90027164	Weighted median	14	0.048039	0.0488233	0.325147	1.04921	0.953463	1.15458	15.304	12	0.225233	0.00646771	0.516443	0.262
33	Amyotrophic lateral sclerosis	Eotaxin levels	90274764	|| id:ebi-a-GCST90027164	Inverse variance weighted	14	0.0560503	0.0396958	0.157951	1.05765	0.978481	1.14323	15.304	12	0.225233	0.00646771	0.516443	0.262
34	Amyotrophic lateral sclerosis	Eotaxin levels	90274764	|| id:ebi-a-GCST90027164	Simple mode	14	0.043722	0.0780877	0.585061	1.04469	0.896435	1.21747	15.304	12	0.225233	0.00646771	0.516443	0.262
35	Amyotrophic lateral sclerosis	Eotaxin levels	90274764	|| id:ebi-a-GCST90027164	Weighted mode	14	0.0356803	0.0599416	0.561894	1.03632	0.921451	1.16552	15.304	12	0.225233	0.00646771	0.516443	0.262
36	Amyotrophic lateral sclerosis	C-C motif chemokine 19 levels	90274765	|| id:ebi-a-GCST90027164	MR Egger	14	0.215552	0.114797	0.0849364	1.24055	0.990595	1.55357	26.9966	12	0.00773584	-0.018131	0.191589	0.005
37	Amyotrophic lateral sclerosis	C-C motif chemokine 19 levels	90274765	|| id:ebi-a-GCST90027164	Weighted median	14	0.0301076	0.0477628	0.528462	1.03057	0.938467	1.1317	26.9966	12	0.00773584	-0.018131	0.191589	0.005
38	Amyotrophic lateral sclerosis	C-C motif chemokine 19 levels	90274765	|| id:ebi-a-GCST90027164	Inverse variance weighted	14	0.076151	0.0569657	0.181292	1.07913	0.965121	1.2066	26.9966	12	0.00773584	-0.018131	0.191589	0.005
39	Amyotrophic lateral sclerosis	C-C motif chemokine 19 levels	90274765	|| id:ebi-a-GCST90027164	Simple mode	14	0.0210454	0.0768016	0.788373	1.02127	0.878547	1.18718	26.9966	12	0.00773584	-0.018131	0.191589	0.005
40	Amyotrophic lateral sclerosis	C-C motif chemokine 19 levels	90274765	|| id:ebi-a-GCST90027164	Weighted mode	14	0.0269701	0.0590183	0.655229	1.02734	0.915115	1.15332	26.9966	12	0.00773584	-0.018131	0.191589	0.005
41	Amyotrophic lateral sclerosis	C-C motif chemokine 20 levels	90274766	|| id:ebi-a-GCST90027164	MR Egger	14	0.0624189	0.0760195	0.427606	1.06441	0.917063	1.23543	9.8839	12	0.626146	0.00292969	0.741854	0.725
42	Amyotrophic lateral sclerosis	C-C motif chemokine 20 levels	90274766	|| id:ebi-a-GCST90027164	Weighted median	14	0.0738822	0.0491908	0.133109	1.07668	0.97772	1.18566	9.8839	12	0.626146	0.00292969	0.741854	0.725
43	Amyotrophic lateral sclerosis	C-C motif chemokine 20 levels	90274766	|| id:ebi-a-GCST90027164	Inverse variance weighted	14	0.0849039	0.0364725	0.019918	1.08861	1.01351	1.16928	9.8839	12	0.626146	0.00292969	0.741854	0.725
44	Amyotrophic lateral sclerosis	C-C motif chemokine 20 levels	90274766	|| id:ebi-a-GCST90027164	Simple mode	14	0.0319906	0.0708088	0.658867	1.03251	0.89871	1.18622	9.8839	12	0.626146	0.00292969	0.741854	0.725
45	Amyotrophic lateral sclerosis	C-C motif chemokine 20 levels	90274766	|| id:ebi-a-GCST90027164	Weighted mode	14	0.0659765	0.0649603	0.32833	1.0682	0.940498	1.21325	9.8839	12	0.626146	0.00292969	0.741854	0.725
46	Amyotrophic lateral sclerosis	C-C motif chemokine 23 levels	90274767	|| id:ebi-a-GCST90027164	MR Egger	14	-0.000736785	0.114292	0.994962	0.999263	0.798717	1.25017	27.7361	12	0.00604524	-0.00214729	0.872193	0.017
47	Amyotrophic lateral sclerosis	C-C motif chemokine 23 levels	90274767	|| id:ebi-a-GCST90027164	Weighted median	14	-0.0304248	0.0492587	0.536803	0.970033	0.880758	1.06836	27.7361	12	0.00604524	-0.00214729	0.872193	0.017
48	Amyotrophic lateral sclerosis	C-C motif chemokine 23 levels	90274767	|| id:ebi-a-GCST90027164	Inverse variance weighted	14	-0.0172179	0.0527377	0.74406	0.98293	0.886403	1.08997	27.7361	12	0.00604524	-0.00214729	0.872193	0.017
49	Amyotrophic lateral sclerosis	C-C motif chemokine 23 levels	90274767	|| id:ebi-a-GCST90027164	Simple mode	14	-0.00797449	0.0856298	0.927222	0.992057	0.838778	1.17335	27.7361	12	0.00604524	-0.00214729	0.872193	0.017
50	Amyotrophic lateral sclerosis	C-C motif chemokine 23 levels	90274767	|| id:ebi-a-GCST90027164	Weighted mode	14	-0.0412096	0.0639271	0.530376	0.959628	0.846617	1.08772	27.7361	12	0.00604524	-0.00214729	0.872193	0.017
51	Amyotrophic lateral sclerosis	C-C motif chemokine 25 levels	90274768	|| id:ebi-a-GCST90027164	MR Egger	14	0.218593	0.0751611	0.013122	1.24432	1.07388	1.44182	11.4085	12	0.49427	-0.0287941	0.00573486	0.062
52	Amyotrophic lateral sclerosis	C-C motif chemokine 25 levels	90274768	|| id:ebi-a-GCST90027164	Weighted median	14	-0.015385	0.0523665	0.768915	0.984733	0.888675	1.09117	11.4085	12	0.49427	-0.0287941	0.00573486	0.062
53	Amyotrophic lateral sclerosis	C-C motif chemokine 25 levels	90274768	|| id:ebi-a-GCST90027164	Inverse variance weighted	14	-0.00273056	0.0475188	0.954177	0.997273	0.908584	1.09462	11.4085	12	0.49427	-0.0287941	0.00573486	0.062
54	Amyotrophic lateral sclerosis	C-C motif chemokine 25 levels	90274768	|| id:ebi-a-GCST90027164	Simple mode	14	-0.0315846	0.0973226	0.750696	0.968909	0.800646	1.17253	11.4085	12	0.49427	-0.0287941	0.00573486	0.062
55	Amyotrophic lateral sclerosis	C-C motif chemokine 25 levels	90274768	|| id:ebi-a-GCST90027164	Weighted mode	14	-0.043881	0.0667828	0.522599	0.957068	0.839646	1.09091	11.4085	12	0.49427	-0.0287941	0.00573486	0.062
56	Amyotrophic lateral sclerosis	C-C motif chemokine 28 levels	90274769	|| id:ebi-a-GCST90027164	MR Egger	14	0.0559365	0.0833604	0.514917	1.05753	0.898122	1.24523	15.6679	12	0.206926	-0.000186177	0.984738	0.289
57	Amyotrophic lateral sclerosis	C-C motif chemokine 28 levels	90274769	|| id:ebi-a-GCST90027164	Weighted median	14	0.056454	0.0482463	0.241953	1.05808	0.962608	1.16302	15.6679	12	0.206926	-0.000186177	0.984738	0.289
58	Amyotrophic lateral sclerosis	C-C motif chemokine 28 levels	90274769	|| id:ebi-a-GCST90027164	Inverse variance weighted	14	0.054507	0.0383434	0.155158	1.05602	0.979565	1.13844	15.6679	12	0.206926	-0.000186177	0.984738	0.289
59	Amyotrophic lateral sclerosis	C-C motif chemokine 28 levels	90274769	|| id:ebi-a-GCST90027164	Simple mode	14	0.0277645	0.0714804	0.703991	1.02815	0.893743	1.18278	15.6679	12	0.206926	-0.000186177	0.984738	0.289
60	Amyotrophic lateral sclerosis	C-C motif chemokine 28 levels	90274769	|| id:ebi-a-GCST90027164	Weighted mode	14	0.0421045	0.0586307	0.485383	1.043	0.929776	1.17002	15.6679	12	0.206926	-0.000186177	0.984738	0.289
61	Amyotrophic lateral sclerosis	C-C motif chemokine 4 levels	90274770	|| id:ebi-a-GCST90027164	MR Egger	14	-0.128821	0.0764583	0.117826	0.879132	0.756783	1.02126	9.82506	12	0.631305	0.0119289	0.197164	0.555
62	Amyotrophic lateral sclerosis	C-C motif chemokine 4 levels	90274770	|| id:ebi-a-GCST90027164	Weighted median	14	-0.0619359	0.0506581	0.221471	0.939943	0.8511	1.03806	9.82506	12	0.631305	0.0119289	0.197164	0.555
63	Amyotrophic lateral sclerosis	C-C motif chemokine 4 levels	90274770	|| id:ebi-a-GCST90027164	Inverse variance weighted	14	-0.0371424	0.0365769	0.309886	0.963539	0.89688	1.03515	9.82506	12	0.631305	0.0119289	0.197164	0.555
64	Amyotrophic lateral sclerosis	C-C motif chemokine 4 levels	90274770	|| id:ebi-a-GCST90027164	Simple mode	14	-0.114905	0.0867012	0.207893	0.891451	0.752135	1.05657	9.82506	12	0.631305	0.0119289	0.197164	0.555
65	Amyotrophic lateral sclerosis	C-C motif chemokine 4 levels	90274770	|| id:ebi-a-GCST90027164	Weighted mode	14	-0.0816849	0.0691632	0.258741	0.921562	0.804733	1.05535	9.82506	12	0.631305	0.0119289	0.197164	0.555
66	Amyotrophic lateral sclerosis	Natural killer cell receptor 2B4 levels	90274771	|| id:ebi-a-GCST90027164	MR Egger	14	-0.0506455	0.0947111	0.602599	0.950616	0.78956	1.14452	19.0188	12	0.0880761	0.0116174	0.304111	0.07
67	Amyotrophic lateral sclerosis	Natural killer cell receptor 2B4 levels	90274771	|| id:ebi-a-GCST90027164	Weighted median	14	0.0443139	0.0545469	0.416563	1.04531	0.939321	1.16326	19.0188	12	0.0880761	0.0116174	0.304111	0.07
68	Amyotrophic lateral sclerosis	Natural killer cell receptor 2B4 levels	90274771	|| id:ebi-a-GCST90027164	Inverse variance weighted	14	0.0386469	0.0455748	0.396444	1.0394	0.950583	1.13652	19.0188	12	0.0880761	0.0116174	0.304111	0.07
69	Amyotrophic lateral sclerosis	Natural killer cell receptor 2B4 levels	90274771	|| id:ebi-a-GCST90027164	Simple mode	14	0.0767874	0.0935026	0.426318	1.07981	0.898995	1.297	19.0188	12	0.0880761	0.0116174	0.304111	0.07
70	Amyotrophic lateral sclerosis	Natural killer cell receptor 2B4 levels	90274771	|| id:ebi-a-GCST90027164	Weighted mode	14	0.0524544	0.0824109	0.535499	1.05385	0.896667	1.2386	19.0188	12	0.0880761	0.0116174	0.304111	0.07
71	Amyotrophic lateral sclerosis	CD40L receptor levels	90274772	|| id:ebi-a-GCST90027164	MR Egger	14	0.0920017	0.0788002	0.265672	1.09637	0.939463	1.27948	13.6335	12	0.324723	-0.00832682	0.373205	0.344
72	Amyotrophic lateral sclerosis	CD40L receptor levels	90274772	|| id:ebi-a-GCST90027164	Weighted median	14	0.0669195	0.0501525	0.182099	1.06921	0.969108	1.17965	13.6335	12	0.324723	-0.00832682	0.373205	0.344
73	Amyotrophic lateral sclerosis	CD40L receptor levels	90274772	|| id:ebi-a-GCST90027164	Inverse variance weighted	14	0.0279654	0.0374292	0.454969	1.02836	0.955619	1.10664	13.6335	12	0.324723	-0.00832682	0.373205	0.344
74	Amyotrophic lateral sclerosis	CD40L receptor levels	90274772	|| id:ebi-a-GCST90027164	Simple mode	14	0.0864593	0.0891337	0.34975	1.09031	0.915539	1.29844	13.6335	12	0.324723	-0.00832682	0.373205	0.344
75	Amyotrophic lateral sclerosis	CD40L receptor levels	90274772	|| id:ebi-a-GCST90027164	Weighted mode	14	0.0823423	0.0856897	0.354118	1.08583	0.917953	1.2844	13.6335	12	0.324723	-0.00832682	0.373205	0.344
76	Amyotrophic lateral sclerosis	T-cell surface glycoprotein CD5 levels	90274773	|| id:ebi-a-GCST90027164	MR Egger	14	0.00489413	0.0850065	0.955036	1.00491	0.850681	1.18709	15.4692	12	0.216772	0.00212863	0.830038	0.188
77	Amyotrophic lateral sclerosis	T-cell surface glycoprotein CD5 levels	90274773	|| id:ebi-a-GCST90027164	Weighted median	14	0.03419	0.0546848	0.531827	1.03478	0.929608	1.15185	15.4692	12	0.216772	0.00212863	0.830038	0.188
78	Amyotrophic lateral sclerosis	T-cell surface glycoprotein CD5 levels	90274773	|| id:ebi-a-GCST90027164	Inverse variance weighted	14	0.0212747	0.0391174	0.586532	1.0215	0.946111	1.1029	15.4692	12	0.216772	0.00212863	0.830038	0.188
79	Amyotrophic lateral sclerosis	T-cell surface glycoprotein CD5 levels	90274773	|| id:ebi-a-GCST90027164	Simple mode	14	0.075649	0.0899227	0.415406	1.07858	0.904295	1.28646	15.4692	12	0.216772	0.00212863	0.830038	0.188
80	Amyotrophic lateral sclerosis	T-cell surface glycoprotein CD5 levels	90274773	|| id:ebi-a-GCST90027164	Weighted mode	14	0.0529745	0.110204	0.638722	1.0544	0.84957	1.30862	15.4692	12	0.216772	0.00212863	0.830038	0.188
81	Amyotrophic lateral sclerosis	T-cell surface glycoprotein CD6 isoform levels	90274774	|| id:ebi-a-GCST90027164	MR Egger	14	-0.0244254	0.0934584	0.798254	0.975871	0.812529	1.17205	18.378	12	0.104686	0.00900871	0.415178	0.103
82	Amyotrophic lateral sclerosis	T-cell surface glycoprotein CD6 isoform levels	90274774	|| id:ebi-a-GCST90027164	Weighted median	14	0.037633	0.0548655	0.492767	1.03835	0.932484	1.15624	18.378	12	0.104686	0.00900871	0.415178	0.103
83	Amyotrophic lateral sclerosis	T-cell surface glycoprotein CD6 isoform levels	90274774	|| id:ebi-a-GCST90027164	Inverse variance weighted	14	0.0447971	0.0443085	0.312004	1.04582	0.958824	1.1407	18.378	12	0.104686	0.00900871	0.415178	0.103
84	Amyotrophic lateral sclerosis	T-cell surface glycoprotein CD6 isoform levels	90274774	|| id:ebi-a-GCST90027164	Simple mode	14	0.0498902	0.105954	0.645538	1.05116	0.854039	1.29377	18.378	12	0.104686	0.00900871	0.415178	0.103
85	Amyotrophic lateral sclerosis	T-cell surface glycoprotein CD6 isoform levels	90274774	|| id:ebi-a-GCST90027164	Weighted mode	14	-0.0366762	0.101729	0.724242	0.963988	0.789729	1.1767	18.378	12	0.104686	0.00900871	0.415178	0.103
86	Amyotrophic lateral sclerosis	CUB domain-containing protein 1 levels	90274775	|| id:ebi-a-GCST90027164	MR Egger	14	0.0227229	0.102971	0.829057	1.02298	0.836022	1.25175	23.7168	12	0.0222215	-0.00495054	0.681376	0.036
87	Amyotrophic lateral sclerosis	CUB domain-containing protein 1 levels	90274775	|| id:ebi-a-GCST90027164	Weighted median	14	-0.0407411	0.0579799	0.482257	0.960078	0.856945	1.07562	23.7168	12	0.0222215	-0.00495054	0.681376	0.036
88	Amyotrophic lateral sclerosis	CUB domain-containing protein 1 levels	90274775	|| id:ebi-a-GCST90027164	Inverse variance weighted	14	-0.0153097	0.0477306	0.748397	0.984807	0.896854	1.08138	23.7168	12	0.0222215	-0.00495054	0.681376	0.036
89	Amyotrophic lateral sclerosis	CUB domain-containing protein 1 levels	90274775	|| id:ebi-a-GCST90027164	Simple mode	14	0.121773	0.136621	0.388957	1.1295	0.864154	1.47632	23.7168	12	0.0222215	-0.00495054	0.681376	0.036
90	Amyotrophic lateral sclerosis	CUB domain-containing protein 1 levels	90274775	|| id:ebi-a-GCST90027164	Weighted mode	14	0.12646	0.122102	0.319229	1.1348	0.893275	1.44164	23.7168	12	0.0222215	-0.00495054	0.681376	0.036
91	Amyotrophic lateral sclerosis	Macrophage colony-stimulating factor 1 levels	90274776	|| id:ebi-a-GCST90027164	MR Egger	14	0.116069	0.0985278	0.261619	1.12307	0.925847	1.36231	21.0479	12	0.049684	-0.0105181	0.367853	0.04
92	Amyotrophic lateral sclerosis	Macrophage colony-stimulating factor 1 levels	90274776	|| id:ebi-a-GCST90027164	Weighted median	14	0.0253166	0.055214	0.64658	1.02564	0.920441	1.14286	21.0479	12	0.049684	-0.0105181	0.367853	0.04
93	Amyotrophic lateral sclerosis	Macrophage colony-stimulating factor 1 levels	90274776	|| id:ebi-a-GCST90027164	Inverse variance weighted	14	0.0350105	0.046722	0.453655	1.03563	0.945005	1.13495	21.0479	12	0.049684	-0.0105181	0.367853	0.04
94	Amyotrophic lateral sclerosis	Macrophage colony-stimulating factor 1 levels	90274776	|| id:ebi-a-GCST90027164	Simple mode	14	0.0526373	0.112584	0.647855	1.05405	0.845331	1.3143	21.0479	12	0.049684	-0.0105181	0.367853	0.04
95	Amyotrophic lateral sclerosis	Macrophage colony-stimulating factor 1 levels	90274776	|| id:ebi-a-GCST90027164	Weighted mode	14	0.0253802	0.106055	0.814596	1.0257	0.833195	1.2627	21.0479	12	0.049684	-0.0105181	0.367853	0.04
96	Amyotrophic lateral sclerosis	Cystatin D levels	90274777	|| id:ebi-a-GCST90027164	MR Egger	14	-0.00367157	0.0744515	0.96148	0.996335	0.861055	1.15287	9.78304	12	0.634988	0.00290867	0.738226	0.653
97	Amyotrophic lateral sclerosis	Cystatin D levels	90274777	|| id:ebi-a-GCST90027164	Weighted median	14	0.00440846	0.0501317	0.929926	1.00442	0.91042	1.10812	9.78304	12	0.634988	0.00290867	0.738226	0.653
98	Amyotrophic lateral sclerosis	Cystatin D levels	90274777	|| id:ebi-a-GCST90027164	Inverse variance weighted	14	0.0186783	0.0356888	0.600719	1.01885	0.950021	1.09267	9.78304	12	0.634988	0.00290867	0.738226	0.653
99	Amyotrophic lateral sclerosis	Cystatin D levels	90274777	|| id:ebi-a-GCST90027164	Simple mode	14	0.00636292	0.0800192	0.937832	1.00638	0.860299	1.17727	9.78304	12	0.634988	0.00290867	0.738226	0.653
100	Amyotrophic lateral sclerosis	Cystatin D levels	90274777	|| id:ebi-a-GCST90027164	Weighted mode	14	-0.00969505	0.0698551	0.891745	0.990352	0.86363	1.13567	9.78304	12	0.634988	0.00290867	0.738226	0.653
101	Amyotrophic lateral sclerosis	Fractalkine levels	90274778	|| id:ebi-a-GCST90027164	MR Egger	14	0.0498187	0.0957281	0.612239	1.05108	0.871266	1.26801	19.4063	12	0.0791827	-0.00502417	0.653522	0.103
102	Amyotrophic lateral sclerosis	Fractalkine levels	90274778	|| id:ebi-a-GCST90027164	Weighted median	14	0.0149866	0.0539137	0.781033	1.0151	0.913306	1.12824	19.4063	12	0.0791827	-0.00502417	0.653522	0.103
103	Amyotrophic lateral sclerosis	Fractalkine levels	90274778	|| id:ebi-a-GCST90027164	Inverse variance weighted	14	0.0110762	0.0442024	0.80214	1.01114	0.927224	1.10265	19.4063	12	0.0791827	-0.00502417	0.653522	0.103
104	Amyotrophic lateral sclerosis	Fractalkine levels	90274778	|| id:ebi-a-GCST90027164	Simple mode	14	0.0251397	0.108891	0.82101	1.02546	0.828376	1.26943	19.4063	12	0.0791827	-0.00502417	0.653522	0.103
105	Amyotrophic lateral sclerosis	Fractalkine levels	90274778	|| id:ebi-a-GCST90027164	Weighted mode	14	-0.0250039	0.0754968	0.745778	0.975306	0.841156	1.13085	19.4063	12	0.0791827	-0.00502417	0.653522	0.103
106	Amyotrophic lateral sclerosis	C-X-C motif chemokine 1 levels	90274779	|| id:ebi-a-GCST90027164	MR Egger	14	-0.0818673	0.0891146	0.376362	0.921394	0.77373	1.09724	16.4901	12	0.169805	0.00908773	0.389469	0.182
107	Amyotrophic lateral sclerosis	C-X-C motif chemokine 1 levels	90274779	|| id:ebi-a-GCST90027164	Weighted median	14	-0.00116337	0.0512687	0.981896	0.998837	0.903346	1.10442	16.4901	12	0.169805	0.00908773	0.389469	0.182
108	Amyotrophic lateral sclerosis	C-X-C motif chemokine 1 levels	90274779	|| id:ebi-a-GCST90027164	Inverse variance weighted	14	-0.0120062	0.0423243	0.776663	0.988066	0.909408	1.07353	16.4901	12	0.169805	0.00908773	0.389469	0.182
109	Amyotrophic lateral sclerosis	C-X-C motif chemokine 1 levels	90274779	|| id:ebi-a-GCST90027164	Simple mode	14	-0.00494759	0.0963427	0.959824	0.995065	0.82384	1.20188	16.4901	12	0.169805	0.00908773	0.389469	0.182
110	Amyotrophic lateral sclerosis	C-X-C motif chemokine 1 levels	90274779	|| id:ebi-a-GCST90027164	Weighted mode	14	-0.025265	0.0735116	0.736577	0.975052	0.844215	1.12616	16.4901	12	0.169805	0.00908773	0.389469	0.182
111	Amyotrophic lateral sclerosis	C-X-C motif chemokine 10 levels	90274780	|| id:ebi-a-GCST90027164	MR Egger	14	0.0140362	0.103172	0.89404	1.01414	0.828465	1.24142	22.4132	12	0.0331411	-0.00186777	0.876853	0.065
112	Amyotrophic lateral sclerosis	C-X-C motif chemokine 10 levels	90274780	|| id:ebi-a-GCST90027164	Weighted median	14	-0.0493165	0.0542167	0.363024	0.95188	0.855917	1.0586	22.4132	12	0.0331411	-0.00186777	0.876853	0.065
113	Amyotrophic lateral sclerosis	C-X-C motif chemokine 10 levels	90274780	|| id:ebi-a-GCST90027164	Inverse variance weighted	14	-0.000292466	0.0476185	0.9951	0.999708	0.910624	1.09751	22.4132	12	0.0331411	-0.00186777	0.876853	0.065
114	Amyotrophic lateral sclerosis	C-X-C motif chemokine 10 levels	90274780	|| id:ebi-a-GCST90027164	Simple mode	14	-0.0948917	0.0746872	0.226166	0.909471	0.785623	1.05284	22.4132	12	0.0331411	-0.00186777	0.876853	0.065
115	Amyotrophic lateral sclerosis	C-X-C motif chemokine 10 levels	90274780	|| id:ebi-a-GCST90027164	Weighted mode	14	-0.0710487	0.0587294	0.24791	0.931417	0.830142	1.04505	22.4132	12	0.0331411	-0.00186777	0.876853	0.065
116	Amyotrophic lateral sclerosis	C-X-C motif chemokine 11 levels	90274781	|| id:ebi-a-GCST90027164	MR Egger	14	0.00240509	0.0983849	0.980899	1.00241	0.826604	1.2156	20.1196	12	0.0648569	0.00612151	0.595841	0.115
117	Amyotrophic lateral sclerosis	C-X-C motif chemokine 11 levels	90274781	|| id:ebi-a-GCST90027164	Weighted median	14	0.0101771	0.0528861	0.847403	1.01023	0.910756	1.12057	20.1196	12	0.0648569	0.00612151	0.595841	0.115
118	Amyotrophic lateral sclerosis	C-X-C motif chemokine 11 levels	90274781	|| id:ebi-a-GCST90027164	Inverse variance weighted	14	0.0494451	0.0458828	0.281195	1.05069	0.960323	1.14956	20.1196	12	0.0648569	0.00612151	0.595841	0.115
119	Amyotrophic lateral sclerosis	C-X-C motif chemokine 11 levels	90274781	|| id:ebi-a-GCST90027164	Simple mode	14	-0.0364957	0.0873102	0.682769	0.964162	0.812513	1.14412	20.1196	12	0.0648569	0.00612151	0.595841	0.115
120	Amyotrophic lateral sclerosis	C-X-C motif chemokine 11 levels	90274781	|| id:ebi-a-GCST90027164	Weighted mode	14	0.0196393	0.0619942	0.756431	1.01983	0.903148	1.15159	20.1196	12	0.0648569	0.00612151	0.595841	0.115
121	Amyotrophic lateral sclerosis	C-X-C motif chemokine 5 levels	90274782	|| id:ebi-a-GCST90027164	MR Egger	14	-0.105469	0.0919094	0.273524	0.899902	0.751554	1.07753	17.3431	12	0.137141	0.0138269	0.212156	0.099
122	Amyotrophic lateral sclerosis	C-X-C motif chemokine 5 levels	90274782	|| id:ebi-a-GCST90027164	Weighted median	14	-0.0344443	0.0519643	0.507429	0.966142	0.872586	1.06973	17.3431	12	0.137141	0.0138269	0.212156	0.099
123	Amyotrophic lateral sclerosis	C-X-C motif chemokine 5 levels	90274782	|| id:ebi-a-GCST90027164	Inverse variance weighted	14	0.000911283	0.045174	0.983906	1.00091	0.9161	1.09358	17.3431	12	0.137141	0.0138269	0.212156	0.099
124	Amyotrophic lateral sclerosis	C-X-C motif chemokine 5 levels	90274782	|| id:ebi-a-GCST90027164	Simple mode	14	0.0016054	0.093025	0.986493	1.00161	0.834666	1.20194	17.3431	12	0.137141	0.0138269	0.212156	0.099
125	Amyotrophic lateral sclerosis	C-X-C motif chemokine 5 levels	90274782	|| id:ebi-a-GCST90027164	Weighted mode	14	-0.0509799	0.065231	0.448491	0.950298	0.836246	1.0799	17.3431	12	0.137141	0.0138269	0.212156	0.099
126	Amyotrophic lateral sclerosis	C-X-C motif chemokine 6 levels	90274783	|| id:ebi-a-GCST90027164	MR Egger	14	-0.00898953	0.0865674	0.919008	0.991051	0.836389	1.17431	15.4152	12	0.219509	0.00620727	0.541896	0.324
127	Amyotrophic lateral sclerosis	C-X-C motif chemokine 6 levels	90274783	|| id:ebi-a-GCST90027164	Weighted median	14	0.011498	0.0515012	0.823335	1.01156	0.914439	1.11901	15.4152	12	0.219509	0.00620727	0.541896	0.324
128	Amyotrophic lateral sclerosis	C-X-C motif chemokine 6 levels	90274783	|| id:ebi-a-GCST90027164	Inverse variance weighted	14	0.0387293	0.0404537	0.338378	1.03949	0.960252	1.12527	15.4152	12	0.219509	0.00620727	0.541896	0.324
129	Amyotrophic lateral sclerosis	C-X-C motif chemokine 6 levels	90274783	|| id:ebi-a-GCST90027164	Simple mode	14	-0.0406819	0.0763283	0.603036	0.960135	0.826723	1.11507	15.4152	12	0.219509	0.00620727	0.541896	0.324
130	Amyotrophic lateral sclerosis	C-X-C motif chemokine 6 levels	90274783	|| id:ebi-a-GCST90027164	Weighted mode	14	-0.00935769	0.0628394	0.883906	0.990686	0.875883	1.12054	15.4152	12	0.219509	0.00620727	0.541896	0.324
131	Amyotrophic lateral sclerosis	C-X-C motif chemokine 9 levels	90274784	|| id:ebi-a-GCST90027164	MR Egger	14	0.139002	0.0783883	0.101546	1.14913	0.985467	1.33996	13.8274	12	0.311864	-0.014682	0.127417	0.244
132	Amyotrophic lateral sclerosis	C-X-C motif chemokine 9 levels	90274784	|| id:ebi-a-GCST90027164	Weighted median	14	0.027536	0.0532093	0.604805	1.02792	0.926117	1.14091	13.8274	12	0.311864	-0.014682	0.127417	0.244
133	Amyotrophic lateral sclerosis	C-X-C motif chemokine 9 levels	90274784	|| id:ebi-a-GCST90027164	Inverse variance weighted	14	0.0264352	0.0400522	0.509242	1.02679	0.949265	1.11064	13.8274	12	0.311864	-0.014682	0.127417	0.244
134	Amyotrophic lateral sclerosis	C-X-C motif chemokine 9 levels	90274784	|| id:ebi-a-GCST90027164	Simple mode	14	0.00355982	0.0806911	0.965482	1.00357	0.856762	1.17552	13.8274	12	0.311864	-0.014682	0.127417	0.244
135	Amyotrophic lateral sclerosis	C-X-C motif chemokine 9 levels	90274784	|| id:ebi-a-GCST90027164	Weighted mode	14	0.0188054	0.0648568	0.776426	1.01898	0.897346	1.15711	13.8274	12	0.311864	-0.014682	0.127417	0.244
136	Amyotrophic lateral sclerosis	Delta and Notch-like epidermal growth factor-related receptor levels	90274785	|| id:ebi-a-GCST90027164	MR Egger	14	-0.0677092	0.0750482	0.384697	0.934532	0.8067	1.08262	12.4581	12	0.409627	0.012262	0.178676	0.322
137	Amyotrophic lateral sclerosis	Delta and Notch-like epidermal growth factor-related receptor levels	90274785	|| id:ebi-a-GCST90027164	Weighted median	14	-0.00912515	0.0475473	0.847807	0.990916	0.902743	1.0877	12.4581	12	0.409627	0.012262	0.178676	0.322
138	Amyotrophic lateral sclerosis	Delta and Notch-like epidermal growth factor-related receptor levels	90274785	|| id:ebi-a-GCST90027164	Inverse variance weighted	14	0.0263704	0.0373899	0.480636	1.02672	0.95417	1.10479	12.4581	12	0.409627	0.012262	0.178676	0.322
139	Amyotrophic lateral sclerosis	Delta and Notch-like epidermal growth factor-related receptor levels	90274785	|| id:ebi-a-GCST90027164	Simple mode	14	-0.0112859	0.0746304	0.882121	0.988778	0.854224	1.14453	12.4581	12	0.409627	0.012262	0.178676	0.322
140	Amyotrophic lateral sclerosis	Delta and Notch-like epidermal growth factor-related receptor levels	90274785	|| id:ebi-a-GCST90027164	Weighted mode	14	-0.0347037	0.0582198	0.561357	0.965892	0.861729	1.08265	12.4581	12	0.409627	0.012262	0.178676	0.322
141	Amyotrophic lateral sclerosis	Protein S100-A12 levels	90274786	|| id:ebi-a-GCST90027164	MR Egger	14	-0.126072	0.0761932	0.123898	0.881552	0.75926	1.02354	4.82139	12	0.96368	0.0116028	0.207435	0.917
142	Amyotrophic lateral sclerosis	Protein S100-A12 levels	90274786	|| id:ebi-a-GCST90027164	Weighted median	14	-0.0629701	0.0480042	0.1896	0.938972	0.854654	1.03161	4.82139	12	0.96368	0.0116028	0.207435	0.917
143	Amyotrophic lateral sclerosis	Protein S100-A12 levels	90274786	|| id:ebi-a-GCST90027164	Inverse variance weighted	14	-0.0369594	0.0365136	0.311438	0.963715	0.897155	1.03521	4.82139	12	0.96368	0.0116028	0.207435	0.917
144	Amyotrophic lateral sclerosis	Protein S100-A12 levels	90274786	|| id:ebi-a-GCST90027164	Simple mode	14	-0.0363713	0.0799511	0.656671	0.964282	0.82442	1.12787	4.82139	12	0.96368	0.0116028	0.207435	0.917
145	Amyotrophic lateral sclerosis	Protein S100-A12 levels	90274786	|| id:ebi-a-GCST90027164	Weighted mode	14	-0.0805107	0.069143	0.265183	0.922645	0.80571	1.05655	4.82139	12	0.96368	0.0116028	0.207435	0.917
146	Amyotrophic lateral sclerosis	Fibroblast growth factor 19 levels	90274787	|| id:ebi-a-GCST90027164	MR Egger	14	0.0432248	0.0768756	0.584283	1.04417	0.89812	1.21398	11.2354	12	0.508862	-0.00407261	0.650272	0.602
147	Amyotrophic lateral sclerosis	Fibroblast growth factor 19 levels	90274787	|| id:ebi-a-GCST90027164	Weighted median	14	0.0428813	0.0522164	0.41152	1.04381	0.942271	1.1563	11.2354	12	0.508862	-0.00407261	0.650272	0.602
148	Amyotrophic lateral sclerosis	Fibroblast growth factor 19 levels	90274787	|| id:ebi-a-GCST90027164	Inverse variance weighted	14	0.0118228	0.036728	0.747527	1.01189	0.94161	1.08742	11.2354	12	0.508862	-0.00407261	0.650272	0.602
149	Amyotrophic lateral sclerosis	Fibroblast growth factor 19 levels	90274787	|| id:ebi-a-GCST90027164	Simple mode	14	-0.0929974	0.0819231	0.276797	0.911196	0.776028	1.06991	11.2354	12	0.508862	-0.00407261	0.650272	0.602
150	Amyotrophic lateral sclerosis	Fibroblast growth factor 19 levels	90274787	|| id:ebi-a-GCST90027164	Weighted mode	14	0.0476527	0.0653505	0.47882	1.04881	0.922716	1.19213	11.2354	12	0.508862	-0.00407261	0.650272	0.602
151	Amyotrophic lateral sclerosis	Fibroblast growth factor 21 levels	90274788	|| id:ebi-a-GCST90027164	MR Egger	14	0.0120798	0.0837098	0.887655	1.01215	0.858996	1.19262	14.3592	12	0.278361	-0.000423569	0.965358	0.359
152	Amyotrophic lateral sclerosis	Fibroblast growth factor 21 levels	90274788	|| id:ebi-a-GCST90027164	Weighted median	14	0.0595653	0.0504964	0.238161	1.06138	0.961359	1.1718	14.3592	12	0.278361	-0.000423569	0.965358	0.359
153	Amyotrophic lateral sclerosis	Fibroblast growth factor 21 levels	90274788	|| id:ebi-a-GCST90027164	Inverse variance weighted	14	0.00882156	0.0385445	0.818972	1.00886	0.935452	1.08803	14.3592	12	0.278361	-0.000423569	0.965358	0.359
154	Amyotrophic lateral sclerosis	Fibroblast growth factor 21 levels	90274788	|| id:ebi-a-GCST90027164	Simple mode	14	0.0929623	0.080383	0.268291	1.09742	0.937453	1.28468	14.3592	12	0.278361	-0.000423569	0.965358	0.359
155	Amyotrophic lateral sclerosis	Fibroblast growth factor 21 levels	90274788	|| id:ebi-a-GCST90027164	Weighted mode	14	0.0854778	0.0661904	0.219058	1.08924	0.95671	1.24012	14.3592	12	0.278361	-0.000423569	0.965358	0.359
156	Amyotrophic lateral sclerosis	Fibroblast growth factor 23 levels	90274789	|| id:ebi-a-GCST90027164	MR Egger	14	0.00745448	0.07868	0.926082	1.00748	0.863503	1.17547	13.4717	12	0.335707	0.00175805	0.848082	0.366
157	Amyotrophic lateral sclerosis	Fibroblast growth factor 23 levels	90274789	|| id:ebi-a-GCST90027164	Weighted median	14	-0.00417315	0.0518136	0.935807	0.995836	0.89967	1.10228	13.4717	12	0.335707	0.00175805	0.848082	0.366
158	Amyotrophic lateral sclerosis	Fibroblast growth factor 23 levels	90274789	|| id:ebi-a-GCST90027164	Inverse variance weighted	14	0.0209963	0.0360671	0.560469	1.02122	0.951519	1.09602	13.4717	12	0.335707	0.00175805	0.848082	0.366
159	Amyotrophic lateral sclerosis	Fibroblast growth factor 23 levels	90274789	|| id:ebi-a-GCST90027164	Simple mode	14	-0.0641724	0.0975009	0.521913	0.937843	0.774704	1.13534	13.4717	12	0.335707	0.00175805	0.848082	0.366
160	Amyotrophic lateral sclerosis	Fibroblast growth factor 23 levels	90274789	|| id:ebi-a-GCST90027164	Weighted mode	14	-0.0736717	0.0820942	0.385822	0.928977	0.790906	1.09115	13.4717	12	0.335707	0.00175805	0.848082	0.366
161	Amyotrophic lateral sclerosis	Fibroblast growth factor 5 levels	90274790	|| id:ebi-a-GCST90027164	MR Egger	14	0.00318498	0.09256	0.973116	1.00319	0.836748	1.20274	15.3252	12	0.224132	0.00212348	0.844755	0.313
162	Amyotrophic lateral sclerosis	Fibroblast growth factor 5 levels	90274790	|| id:ebi-a-GCST90027164	Weighted median	14	-0.0128662	0.055284	0.815972	0.987216	0.885836	1.1002	15.3252	12	0.224132	0.00212348	0.844755	0.313
163	Amyotrophic lateral sclerosis	Fibroblast growth factor 5 levels	90274790	|| id:ebi-a-GCST90027164	Inverse variance weighted	14	0.019459	0.0425267	0.64726	1.01965	0.938105	1.10828	15.3252	12	0.224132	0.00212348	0.844755	0.313
164	Amyotrophic lateral sclerosis	Fibroblast growth factor 5 levels	90274790	|| id:ebi-a-GCST90027164	Simple mode	14	-0.0424341	0.089837	0.644511	0.958454	0.803712	1.14299	15.3252	12	0.224132	0.00212348	0.844755	0.313
165	Amyotrophic lateral sclerosis	Fibroblast growth factor 5 levels	90274790	|| id:ebi-a-GCST90027164	Weighted mode	14	-0.0469033	0.0671766	0.497347	0.95418	0.836466	1.08846	15.3252	12	0.224132	0.00212348	0.844755	0.313
166	Amyotrophic lateral sclerosis	Fms-related tyrosine kinase 3 ligand levels	90274791	|| id:ebi-a-GCST90027164	MR Egger	14	-0.00256463	0.0871024	0.976995	0.997439	0.840898	1.18312	15.8941	12	0.196133	-0.00147105	0.884844	0.236
167	Amyotrophic lateral sclerosis	Fms-related tyrosine kinase 3 ligand levels	90274791	|| id:ebi-a-GCST90027164	Weighted median	14	-0.0381843	0.0536597	0.476712	0.962536	0.866444	1.06928	15.8941	12	0.196133	-0.00147105	0.884844	0.236
168	Amyotrophic lateral sclerosis	Fms-related tyrosine kinase 3 ligand levels	90274791	|| id:ebi-a-GCST90027164	Inverse variance weighted	14	-0.0138801	0.0400784	0.7291	0.986216	0.91171	1.06681	15.8941	12	0.196133	-0.00147105	0.884844	0.236
169	Amyotrophic lateral sclerosis	Fms-related tyrosine kinase 3 ligand levels	90274791	|| id:ebi-a-GCST90027164	Simple mode	14	-0.0527631	0.0921959	0.576887	0.948605	0.791784	1.13649	15.8941	12	0.196133	-0.00147105	0.884844	0.236
170	Amyotrophic lateral sclerosis	Fms-related tyrosine kinase 3 ligand levels	90274791	|| id:ebi-a-GCST90027164	Weighted mode	14	-0.0041169	0.0961319	0.966491	0.995892	0.824865	1.20238	15.8941	12	0.196133	-0.00147105	0.884844	0.236
171	Amyotrophic lateral sclerosis	Glial cell line-derived neurotrophic factor levels	90274792	|| id:ebi-a-GCST90027164	MR Egger	14	0.0413021	0.0749333	0.591622	1.04217	0.899814	1.20704	11.6831	12	0.471455	0.00290729	0.739732	0.568
172	Amyotrophic lateral sclerosis	Glial cell line-derived neurotrophic factor levels	90274792	|| id:ebi-a-GCST90027164	Weighted median	14	0.0263674	0.0498625	0.596943	1.02672	0.931124	1.13213	11.6831	12	0.471455	0.00290729	0.739732	0.568
173	Amyotrophic lateral sclerosis	Glial cell line-derived neurotrophic factor levels	90274792	|| id:ebi-a-GCST90027164	Inverse variance weighted	14	0.0636863	0.0357871	0.0751438	1.06576	0.993564	1.1432	11.6831	12	0.471455	0.00290729	0.739732	0.568
174	Amyotrophic lateral sclerosis	Glial cell line-derived neurotrophic factor levels	90274792	|| id:ebi-a-GCST90027164	Simple mode	14	0.0118456	0.084364	0.890488	1.01192	0.857694	1.19387	11.6831	12	0.471455	0.00290729	0.739732	0.568
175	Amyotrophic lateral sclerosis	Glial cell line-derived neurotrophic factor levels	90274792	|| id:ebi-a-GCST90027164	Weighted mode	14	0.0339892	0.0620868	0.593346	1.03457	0.916035	1.16845	11.6831	12	0.471455	0.00290729	0.739732	0.568
176	Amyotrophic lateral sclerosis	Hepatocyte growth factor levels	90274793	|| id:ebi-a-GCST90027164	MR Egger	14	-0.0213752	0.0880166	0.81222	0.978852	0.82375	1.16316	16.8834	12	0.154034	0.00466966	0.651089	0.185
177	Amyotrophic lateral sclerosis	Hepatocyte growth factor levels	90274793	|| id:ebi-a-GCST90027164	Weighted median	14	-0.00264532	0.049395	0.95729	0.997358	0.905327	1.09875	16.8834	12	0.154034	0.00466966	0.651089	0.185
178	Amyotrophic lateral sclerosis	Hepatocyte growth factor levels	90274793	|| id:ebi-a-GCST90027164	Inverse variance weighted	14	0.0144372	0.0409521	0.724435	1.01454	0.936291	1.09933	16.8834	12	0.154034	0.00466966	0.651089	0.185
179	Amyotrophic lateral sclerosis	Hepatocyte growth factor levels	90274793	|| id:ebi-a-GCST90027164	Simple mode	14	-0.00764968	0.0778623	0.923235	0.99238	0.851922	1.15599	16.8834	12	0.154034	0.00466966	0.651089	0.185
180	Amyotrophic lateral sclerosis	Hepatocyte growth factor levels	90274793	|| id:ebi-a-GCST90027164	Weighted mode	14	-0.0226444	0.0676559	0.74319	0.97761	0.856201	1.11623	16.8834	12	0.154034	0.00466966	0.651089	0.185
181	Amyotrophic lateral sclerosis	Interferon gamma levels	90274794	|| id:ebi-a-GCST90027164	MR Egger	14	-0.07983	0.0878291	0.381283	0.923273	0.777264	1.09671	13.2906	12	0.348279	0.0112641	0.284567	0.304
182	Amyotrophic lateral sclerosis	Interferon gamma levels	90274794	|| id:ebi-a-GCST90027164	Weighted median	14	0.0128017	0.0565706	0.820971	1.01288	0.906579	1.13165	13.2906	12	0.348279	0.0112641	0.284567	0.304
183	Amyotrophic lateral sclerosis	Interferon gamma levels	90274794	|| id:ebi-a-GCST90027164	Inverse variance weighted	14	0.00657218	0.0424126	0.876854	1.00659	0.926301	1.09385	13.2906	12	0.348279	0.0112641	0.284567	0.304
184	Amyotrophic lateral sclerosis	Interferon gamma levels	90274794	|| id:ebi-a-GCST90027164	Simple mode	14	0.0435666	0.0975705	0.662574	1.04453	0.862714	1.26466	13.2906	12	0.348279	0.0112641	0.284567	0.304
185	Amyotrophic lateral sclerosis	Interferon gamma levels	90274794	|| id:ebi-a-GCST90027164	Weighted mode	14	-0.00505996	0.0746759	0.947009	0.994953	0.859483	1.15178	13.2906	12	0.348279	0.0112641	0.284567	0.304
186	Amyotrophic lateral sclerosis	Interleukin-10 levels	90274795	|| id:ebi-a-GCST90027164	MR Egger	14	0.179687	0.101119	0.100903	1.19684	0.981664	1.45919	21.1808	12	0.0477941	-0.0187232	0.130589	0.022
187	Amyotrophic lateral sclerosis	Interleukin-10 levels	90274795	|| id:ebi-a-GCST90027164	Weighted median	14	0.0149116	0.0509227	0.769654	1.01502	0.918607	1.12156	21.1808	12	0.0477941	-0.0187232	0.130589	0.022
188	Amyotrophic lateral sclerosis	Interleukin-10 levels	90274795	|| id:ebi-a-GCST90027164	Inverse variance weighted	14	0.0356336	0.0513814	0.487988	1.03628	0.936998	1.14607	21.1808	12	0.0477941	-0.0187232	0.130589	0.022
189	Amyotrophic lateral sclerosis	Interleukin-10 levels	90274795	|| id:ebi-a-GCST90027164	Simple mode	14	0.104641	0.0767894	0.196118	1.11031	0.95517	1.29065	21.1808	12	0.0477941	-0.0187232	0.130589	0.022
190	Amyotrophic lateral sclerosis	Interleukin-10 levels	90274795	|| id:ebi-a-GCST90027164	Weighted mode	14	0.0585417	0.0661691	0.392373	1.06029	0.931322	1.20711	21.1808	12	0.0477941	-0.0187232	0.130589	0.022
191	Amyotrophic lateral sclerosis	Interleukin-10 receptor subunit alpha levels	90274796	|| id:ebi-a-GCST90027164	MR Egger	14	-0.0732229	0.0843964	0.402627	0.929394	0.787698	1.09658	8.2439	12	0.765792	0.0105803	0.295866	0.709
192	Amyotrophic lateral sclerosis	Interleukin-10 receptor subunit alpha levels	90274796	|| id:ebi-a-GCST90027164	Weighted median	14	0.0218224	0.0554113	0.693709	1.02206	0.916875	1.13932	8.2439	12	0.765792	0.0105803	0.295866	0.709
193	Amyotrophic lateral sclerosis	Interleukin-10 receptor subunit alpha levels	90274796	|| id:ebi-a-GCST90027164	Inverse variance weighted	14	0.00774248	0.0404363	0.848154	1.00777	0.930985	1.09089	8.2439	12	0.765792	0.0105803	0.295866	0.709
194	Amyotrophic lateral sclerosis	Interleukin-10 receptor subunit alpha levels	90274796	|| id:ebi-a-GCST90027164	Simple mode	14	0.0060467	0.0902631	0.947609	1.00607	0.842932	1.20077	8.2439	12	0.765792	0.0105803	0.295866	0.709
195	Amyotrophic lateral sclerosis	Interleukin-10 receptor subunit alpha levels	90274796	|| id:ebi-a-GCST90027164	Weighted mode	14	0.0473545	0.0730953	0.528361	1.04849	0.908544	1.21	8.2439	12	0.765792	0.0105803	0.295866	0.709
196	Amyotrophic lateral sclerosis	Interleukin-10 receptor subunit beta levels	90274797	|| id:ebi-a-GCST90027164	MR Egger	14	0.0452403	0.116197	0.703846	1.04628	0.833179	1.31388	29.2809	12	0.00357859	-0.00568375	0.675952	0.001
197	Amyotrophic lateral sclerosis	Interleukin-10 receptor subunit beta levels	90274797	|| id:ebi-a-GCST90027164	Weighted median	14	-0.00172058	0.053029	0.974116	0.998281	0.899733	1.10762	29.2809	12	0.00357859	-0.00568375	0.675952	0.001
198	Amyotrophic lateral sclerosis	Interleukin-10 receptor subunit beta levels	90274797	|| id:ebi-a-GCST90027164	Inverse variance weighted	14	0.00146881	0.0535694	0.978126	1.00147	0.901652	1.11234	29.2809	12	0.00357859	-0.00568375	0.675952	0.001
199	Amyotrophic lateral sclerosis	Interleukin-10 receptor subunit beta levels	90274797	|| id:ebi-a-GCST90027164	Simple mode	14	-0.0707221	0.0962482	0.475515	0.931721	0.771539	1.12516	29.2809	12	0.00357859	-0.00568375	0.675952	0.001
200	Amyotrophic lateral sclerosis	Interleukin-10 receptor subunit beta levels	90274797	|| id:ebi-a-GCST90027164	Weighted mode	14	-0.0949924	0.0820284	0.267679	0.90938	0.774322	1.068	29.2809	12	0.00357859	-0.00568375	0.675952	0.001
201	Amyotrophic lateral sclerosis	Interleukin-12 subunit beta levels	90274798	|| id:ebi-a-GCST90027164	MR Egger	14	0.178723	0.0902853	0.0711608	1.19569	1.00177	1.42715	17.0566	12	0.147482	-0.0125081	0.248748	0.127
202	Amyotrophic lateral sclerosis	Interleukin-12 subunit beta levels	90274798	|| id:ebi-a-GCST90027164	Weighted median	14	0.001245	0.055103	0.981974	1.00125	0.898744	1.11544	17.0566	12	0.147482	-0.0125081	0.248748	0.127
203	Amyotrophic lateral sclerosis	Interleukin-12 subunit beta levels	90274798	|| id:ebi-a-GCST90027164	Inverse variance weighted	14	0.0826619	0.0440411	0.0605285	1.08617	0.996348	1.1841	17.0566	12	0.147482	-0.0125081	0.248748	0.127
204	Amyotrophic lateral sclerosis	Interleukin-12 subunit beta levels	90274798	|| id:ebi-a-GCST90027164	Simple mode	14	-0.0252241	0.0837811	0.768121	0.975091	0.827426	1.14911	17.0566	12	0.147482	-0.0125081	0.248748	0.127
205	Amyotrophic lateral sclerosis	Interleukin-12 subunit beta levels	90274798	|| id:ebi-a-GCST90027164	Weighted mode	14	-0.0199113	0.0642124	0.761412	0.980286	0.864359	1.11176	17.0566	12	0.147482	-0.0125081	0.248748	0.127
206	Amyotrophic lateral sclerosis	Interleukin-13 levels	90274799	|| id:ebi-a-GCST90027164	MR Egger	14	0.0100643	0.0844189	0.907075	1.01012	0.856076	1.19187	11.1039	12	0.520035	0.00641045	0.520377	0.571
207	Amyotrophic lateral sclerosis	Interleukin-13 levels	90274799	|| id:ebi-a-GCST90027164	Weighted median	14	0.0236762	0.0556215	0.670351	1.02396	0.918198	1.1419	11.1039	12	0.520035	0.00641045	0.520377	0.571
208	Amyotrophic lateral sclerosis	Interleukin-13 levels	90274799	|| id:ebi-a-GCST90027164	Inverse variance weighted	14	0.0591273	0.0404546	0.143858	1.06091	0.980038	1.14846	11.1039	12	0.520035	0.00641045	0.520377	0.571
209	Amyotrophic lateral sclerosis	Interleukin-13 levels	90274799	|| id:ebi-a-GCST90027164	Simple mode	14	-0.0121519	0.0983512	0.903557	0.987922	0.814712	1.19796	11.1039	12	0.520035	0.00641045	0.520377	0.571
210	Amyotrophic lateral sclerosis	Interleukin-13 levels	90274799	|| id:ebi-a-GCST90027164	Weighted mode	14	0.00112022	0.0789701	0.988897	1.00112	0.857562	1.16871	11.1039	12	0.520035	0.00641045	0.520377	0.571
211	Amyotrophic lateral sclerosis	Interleukin-15 receptor subunit alpha levels	90274800	|| id:ebi-a-GCST90027164	MR Egger	14	-0.132587	0.106961	0.238826	0.875827	0.710184	1.0801	20.2682	12	0.0621804	0.0169001	0.193582	0.027
212	Amyotrophic lateral sclerosis	Interleukin-15 receptor subunit alpha levels	90274800	|| id:ebi-a-GCST90027164	Weighted median	14	0.0360561	0.0614256	0.557211	1.03671	0.919121	1.16935	20.2682	12	0.0621804	0.0169001	0.193582	0.027
213	Amyotrophic lateral sclerosis	Interleukin-15 receptor subunit alpha levels	90274800	|| id:ebi-a-GCST90027164	Inverse variance weighted	14	-0.00314692	0.0527972	0.952471	0.996858	0.898859	1.10554	20.2682	12	0.0621804	0.0169001	0.193582	0.027
214	Amyotrophic lateral sclerosis	Interleukin-15 receptor subunit alpha levels	90274800	|| id:ebi-a-GCST90027164	Simple mode	14	0.114873	0.122911	0.367029	1.12173	0.881586	1.42729	20.2682	12	0.0621804	0.0169001	0.193582	0.027
215	Amyotrophic lateral sclerosis	Interleukin-15 receptor subunit alpha levels	90274800	|| id:ebi-a-GCST90027164	Weighted mode	14	0.0742354	0.144209	0.61535	1.07706	0.81187	1.42887	20.2682	12	0.0621804	0.0169001	0.193582	0.027
216	Amyotrophic lateral sclerosis	Interleukin-17A levels	90274801	|| id:ebi-a-GCST90027164	MR Egger	14	-0.162363	0.0842879	0.0780825	0.850132	0.720675	1.00284	9.92179	12	0.622822	0.019294	0.069272	0.385
217	Amyotrophic lateral sclerosis	Interleukin-17A levels	90274801	|| id:ebi-a-GCST90027164	Weighted median	14	-0.0197831	0.0584385	0.734965	0.980411	0.874308	1.09939	9.92179	12	0.622822	0.019294	0.069272	0.385
218	Amyotrophic lateral sclerosis	Interleukin-17A levels	90274801	|| id:ebi-a-GCST90027164	Inverse variance weighted	14	-0.0148016	0.0417874	0.72318	0.985307	0.907824	1.0694	9.92179	12	0.622822	0.019294	0.069272	0.385
219	Amyotrophic lateral sclerosis	Interleukin-17A levels	90274801	|| id:ebi-a-GCST90027164	Simple mode	14	0.0131323	0.104231	0.901666	1.01322	0.826	1.24287	9.92179	12	0.622822	0.019294	0.069272	0.385
220	Amyotrophic lateral sclerosis	Interleukin-17A levels	90274801	|| id:ebi-a-GCST90027164	Weighted mode	14	0.00440366	0.072149	0.952259	1.00441	0.871963	1.15698	9.92179	12	0.622822	0.019294	0.069272	0.385
221	Amyotrophic lateral sclerosis	Interleukin-17C levels	90274802	|| id:ebi-a-GCST90027164	MR Egger	14	-0.0837128	0.0862464	0.350894	0.919695	0.776657	1.08908	12.6256	12	0.396831	0.0164615	0.121819	0.32
222	Amyotrophic lateral sclerosis	Interleukin-17C levels	90274802	|| id:ebi-a-GCST90027164	Weighted median	14	0.00767369	0.0565268	0.892016	1.0077	0.90202	1.12577	12.6256	12	0.396831	0.0164615	0.121819	0.32
223	Amyotrophic lateral sclerosis	Interleukin-17C levels	90274802	|| id:ebi-a-GCST90027164	Inverse variance weighted	14	0.0422613	0.044116	0.338084	1.04317	0.956757	1.13738	12.6256	12	0.396831	0.0164615	0.121819	0.32
224	Amyotrophic lateral sclerosis	Interleukin-17C levels	90274802	|| id:ebi-a-GCST90027164	Simple mode	14	-0.00607116	0.085993	0.94479	0.993947	0.839778	1.17642	12.6256	12	0.396831	0.0164615	0.121819	0.32
225	Amyotrophic lateral sclerosis	Interleukin-17C levels	90274802	|| id:ebi-a-GCST90027164	Weighted mode	14	-0.00348975	0.0761196	0.96413	0.996516	0.858401	1.15685	12.6256	12	0.396831	0.0164615	0.121819	0.32
226	Amyotrophic lateral sclerosis	Interleukin-18 levels	90274803	|| id:ebi-a-GCST90027164	MR Egger	14	0.00728184	0.0821298	0.930813	1.00731	0.857536	1.18324	14.1298	12	0.292497	-0.00397534	0.679436	0.298
227	Amyotrophic lateral sclerosis	Interleukin-18 levels	90274803	|| id:ebi-a-GCST90027164	Weighted median	14	-0.0298717	0.0543777	0.582774	0.97057	0.872448	1.07973	14.1298	12	0.292497	-0.00397534	0.679436	0.298
228	Amyotrophic lateral sclerosis	Interleukin-18 levels	90274803	|| id:ebi-a-GCST90027164	Inverse variance weighted	14	-0.0232432	0.0381017	0.541841	0.977025	0.906719	1.05278	14.1298	12	0.292497	-0.00397534	0.679436	0.298
229	Amyotrophic lateral sclerosis	Interleukin-18 levels	90274803	|| id:ebi-a-GCST90027164	Simple mode	14	-0.0326725	0.102012	0.753844	0.967855	0.792458	1.18207	14.1298	12	0.292497	-0.00397534	0.679436	0.298
230	Amyotrophic lateral sclerosis	Interleukin-18 levels	90274803	|| id:ebi-a-GCST90027164	Weighted mode	14	-0.0882362	0.105865	0.419625	0.915545	0.743988	1.12666	14.1298	12	0.292497	-0.00397534	0.679436	0.298
231	Amyotrophic lateral sclerosis	interleukin-18 receptor 1 levels	90274804	|| id:ebi-a-GCST90027164	MR Egger	14	0.0870341	0.0886741	0.345719	1.09093	0.916891	1.29801	16.4737	12	0.17049	-0.00640391	0.539044	0.242
232	Amyotrophic lateral sclerosis	interleukin-18 receptor 1 levels	90274804	|| id:ebi-a-GCST90027164	Weighted median	14	0.0186283	0.0516724	0.718468	1.0188	0.920674	1.12739	16.4737	12	0.17049	-0.00640391	0.539044	0.242
233	Amyotrophic lateral sclerosis	interleukin-18 receptor 1 levels	90274804	|| id:ebi-a-GCST90027164	Inverse variance weighted	14	0.0378096	0.0414669	0.361873	1.03853	0.957466	1.12647	16.4737	12	0.17049	-0.00640391	0.539044	0.242
234	Amyotrophic lateral sclerosis	interleukin-18 receptor 1 levels	90274804	|| id:ebi-a-GCST90027164	Simple mode	14	0.043081	0.0939181	0.654019	1.04402	0.868491	1.25503	16.4737	12	0.17049	-0.00640391	0.539044	0.242
235	Amyotrophic lateral sclerosis	interleukin-18 receptor 1 levels	90274804	|| id:ebi-a-GCST90027164	Weighted mode	14	0.00594874	0.0692059	0.93281	1.00597	0.878363	1.15211	16.4737	12	0.17049	-0.00640391	0.539044	0.242
236	Amyotrophic lateral sclerosis	Interleukin-1-alpha levels	90274805	|| id:ebi-a-GCST90027164	MR Egger	14	0.0906909	0.105585	0.407205	1.09493	0.890248	1.34667	18.7926	12	0.0936579	-0.0066107	0.594921	0.114
237	Amyotrophic lateral sclerosis	Interleukin-1-alpha levels	90274805	|| id:ebi-a-GCST90027164	Weighted median	14	0.0828104	0.0597436	0.165717	1.08634	0.966294	1.22129	18.7926	12	0.0936579	-0.0066107	0.594921	0.114
238	Amyotrophic lateral sclerosis	Interleukin-1-alpha levels	90274805	|| id:ebi-a-GCST90027164	Inverse variance weighted	14	0.040065	0.0491924	0.415385	1.04088	0.945206	1.14623	18.7926	12	0.0936579	-0.0066107	0.594921	0.114
239	Amyotrophic lateral sclerosis	Interleukin-1-alpha levels	90274805	|| id:ebi-a-GCST90027164	Simple mode	14	0.0151943	0.0938304	0.873848	1.01531	0.844751	1.22031	18.7926	12	0.0936579	-0.0066107	0.594921	0.114
240	Amyotrophic lateral sclerosis	Interleukin-1-alpha levels	90274805	|| id:ebi-a-GCST90027164	Weighted mode	14	0.116845	0.0757062	0.146718	1.12395	0.968953	1.30373	18.7926	12	0.0936579	-0.0066107	0.594921	0.114
241	Amyotrophic lateral sclerosis	Interleukin-2 levels	90274806	|| id:ebi-a-GCST90027164	MR Egger	14	-0.080901	0.0840163	0.354591	0.922285	0.782256	1.08738	8.0514	12	0.781101	0.0193412	0.0678059	0.57
242	Amyotrophic lateral sclerosis	Interleukin-2 levels	90274806	|| id:ebi-a-GCST90027164	Weighted median	14	0.0695349	0.0593547	0.241393	1.07201	0.954278	1.20427	8.0514	12	0.781101	0.0193412	0.0678059	0.57
243	Amyotrophic lateral sclerosis	Interleukin-2 levels	90274806	|| id:ebi-a-GCST90027164	Inverse variance weighted	14	0.067161	0.0402094	0.0948641	1.06947	0.988418	1.15716	8.0514	12	0.781101	0.0193412	0.0678059	0.57
244	Amyotrophic lateral sclerosis	Interleukin-2 levels	90274806	|| id:ebi-a-GCST90027164	Simple mode	14	0.140047	0.0902569	0.144742	1.15033	0.963815	1.37294	8.0514	12	0.781101	0.0193412	0.0678059	0.57
245	Amyotrophic lateral sclerosis	Interleukin-2 levels	90274806	|| id:ebi-a-GCST90027164	Weighted mode	14	0.106777	0.0752565	0.179474	1.11269	0.960092	1.28953	8.0514	12	0.781101	0.0193412	0.0678059	0.57
246	Amyotrophic lateral sclerosis	Interleukin-20 levels	90274807	|| id:ebi-a-GCST90027164	MR Egger	14	0.0460152	0.0995204	0.652088	1.04709	0.861531	1.27262	17.0253	12	0.148649	-0.00626528	0.592848	0.194
247	Amyotrophic lateral sclerosis	Interleukin-20 levels	90274807	|| id:ebi-a-GCST90027164	Weighted median	14	0.0570607	0.0576232	0.322058	1.05872	0.945652	1.18531	17.0253	12	0.148649	-0.00626528	0.592848	0.194
248	Amyotrophic lateral sclerosis	Interleukin-20 levels	90274807	|| id:ebi-a-GCST90027164	Inverse variance weighted	14	-0.00200577	0.0462736	0.965426	0.997996	0.911465	1.09274	17.0253	12	0.148649	-0.00626528	0.592848	0.194
249	Amyotrophic lateral sclerosis	Interleukin-20 levels	90274807	|| id:ebi-a-GCST90027164	Simple mode	14	0.113591	0.112998	0.333122	1.12029	0.897731	1.39803	17.0253	12	0.148649	-0.00626528	0.592848	0.194
250	Amyotrophic lateral sclerosis	Interleukin-20 levels	90274807	|| id:ebi-a-GCST90027164	Weighted mode	14	0.0840955	0.0868194	0.350409	1.08773	0.917529	1.28951	17.0253	12	0.148649	-0.00626528	0.592848	0.194
251	Amyotrophic lateral sclerosis	Interleukin-20 receptor subunit alpha levels	90274808	|| id:ebi-a-GCST90027164	MR Egger	14	0.0376528	0.0848859	0.665246	1.03837	0.879217	1.22633	5.0507	12	0.956264	-0.00211655	0.831541	0.98
252	Amyotrophic lateral sclerosis	Interleukin-20 receptor subunit alpha levels	90274808	|| id:ebi-a-GCST90027164	Weighted median	14	-0.00579319	0.052696	0.91246	0.994224	0.896661	1.1024	5.0507	12	0.956264	-0.00211655	0.831541	0.98
253	Amyotrophic lateral sclerosis	Interleukin-20 receptor subunit alpha levels	90274808	|| id:ebi-a-GCST90027164	Inverse variance weighted	14	0.0214586	0.0407108	0.598125	1.02169	0.943334	1.10656	5.0507	12	0.956264	-0.00211655	0.831541	0.98
254	Amyotrophic lateral sclerosis	Interleukin-20 receptor subunit alpha levels	90274808	|| id:ebi-a-GCST90027164	Simple mode	14	-0.0328633	0.0844213	0.703373	0.967671	0.8201	1.1418	5.0507	12	0.956264	-0.00211655	0.831541	0.98
255	Amyotrophic lateral sclerosis	Interleukin-20 receptor subunit alpha levels	90274808	|| id:ebi-a-GCST90027164	Weighted mode	14	-0.0178547	0.0679221	0.79677	0.982304	0.859863	1.12218	5.0507	12	0.956264	-0.00211655	0.831541	0.98
256	Amyotrophic lateral sclerosis	Interleukin-22 receptor subunit alpha-1 levels	90274809	|| id:ebi-a-GCST90027164	MR Egger	14	-0.122947	0.085591	0.176431	0.884311	0.747736	1.04583	6.89165	12	0.86469	0.0192558	0.073314	0.686
257	Amyotrophic lateral sclerosis	Interleukin-22 receptor subunit alpha-1 levels	90274809	|| id:ebi-a-GCST90027164	Weighted median	14	0.00115165	0.0579527	0.984145	1.00115	0.893655	1.12158	6.89165	12	0.86469	0.0192558	0.073314	0.686
258	Amyotrophic lateral sclerosis	Interleukin-22 receptor subunit alpha-1 levels	90274809	|| id:ebi-a-GCST90027164	Inverse variance weighted	14	0.0243611	0.0411283	0.553636	1.02466	0.945303	1.11068	6.89165	12	0.86469	0.0192558	0.073314	0.686
259	Amyotrophic lateral sclerosis	Interleukin-22 receptor subunit alpha-1 levels	90274809	|| id:ebi-a-GCST90027164	Simple mode	14	-0.0517673	0.087304	0.563385	0.94955	0.800208	1.12676	6.89165	12	0.86469	0.0192558	0.073314	0.686
260	Amyotrophic lateral sclerosis	Interleukin-22 receptor subunit alpha-1 levels	90274809	|| id:ebi-a-GCST90027164	Weighted mode	14	-0.00540866	0.0724444	0.941622	0.994606	0.862949	1.14635	6.89165	12	0.86469	0.0192558	0.073314	0.686
261	Amyotrophic lateral sclerosis	Interleukin-24 levels	90274810	|| id:ebi-a-GCST90027164	MR Egger	14	0.00565919	0.0966256	0.95426	1.00568	0.832163	1.21537	15.4139	12	0.219576	0.00215629	0.848969	0.262
262	Amyotrophic lateral sclerosis	Interleukin-24 levels	90274810	|| id:ebi-a-GCST90027164	Weighted median	14	0.0301526	0.0603124	0.617117	1.03061	0.915706	1.15994	15.4139	12	0.219576	0.00215629	0.848969	0.262
263	Amyotrophic lateral sclerosis	Interleukin-24 levels	90274810	|| id:ebi-a-GCST90027164	Inverse variance weighted	14	0.0221484	0.0446816	0.62011	1.0224	0.936667	1.11597	15.4139	12	0.219576	0.00215629	0.848969	0.262
264	Amyotrophic lateral sclerosis	Interleukin-24 levels	90274810	|| id:ebi-a-GCST90027164	Simple mode	14	0.0163045	0.11186	0.886348	1.01644	0.816326	1.26561	15.4139	12	0.219576	0.00215629	0.848969	0.262
265	Amyotrophic lateral sclerosis	Interleukin-24 levels	90274810	|| id:ebi-a-GCST90027164	Weighted mode	14	0.0356953	0.0832081	0.674955	1.03634	0.880388	1.21992	15.4139	12	0.219576	0.00215629	0.848969	0.262
266	Amyotrophic lateral sclerosis	Interleukin-2 receptor subunit beta levels	90274811	|| id:ebi-a-GCST90027164	MR Egger	14	-0.008129	0.103385	0.938624	0.991904	0.809966	1.21471	18.1875	12	0.110114	0.00942139	0.442005	0.125
267	Amyotrophic lateral sclerosis	Interleukin-2 receptor subunit beta levels	90274811	|| id:ebi-a-GCST90027164	Weighted median	14	0.0391439	0.0600055	0.514184	1.03992	0.924533	1.16971	18.1875	12	0.110114	0.00942139	0.442005	0.125
268	Amyotrophic lateral sclerosis	Interleukin-2 receptor subunit beta levels	90274811	|| id:ebi-a-GCST90027164	Inverse variance weighted	14	0.0640414	0.0487842	0.189267	1.06614	0.968918	1.17311	18.1875	12	0.110114	0.00942139	0.442005	0.125
269	Amyotrophic lateral sclerosis	Interleukin-2 receptor subunit beta levels	90274811	|| id:ebi-a-GCST90027164	Simple mode	14	0.0570058	0.120523	0.644066	1.05866	0.835922	1.34075	18.1875	12	0.110114	0.00942139	0.442005	0.125
270	Amyotrophic lateral sclerosis	Interleukin-2 receptor subunit beta levels	90274811	|| id:ebi-a-GCST90027164	Weighted mode	14	0.00238135	0.0861828	0.978376	1.00238	0.846591	1.18685	18.1875	12	0.110114	0.00942139	0.442005	0.125
271	Amyotrophic lateral sclerosis	Interleukin-33 levels	90274812	|| id:ebi-a-GCST90027164	MR Egger	14	0.0812891	0.0858744	0.362513	1.08468	0.916654	1.28352	12.5735	12	0.400788	-0.000890919	0.929318	0.497
272	Amyotrophic lateral sclerosis	Interleukin-33 levels	90274812	|| id:ebi-a-GCST90027164	Weighted median	14	0.0798622	0.0564463	0.157117	1.08314	0.969696	1.20985	12.5735	12	0.400788	-0.000890919	0.929318	0.497
273	Amyotrophic lateral sclerosis	Interleukin-33 levels	90274812	|| id:ebi-a-GCST90027164	Inverse variance weighted	14	0.074459	0.0401504	0.0636675	1.0773	0.995773	1.1655	12.5735	12	0.400788	-0.000890919	0.929318	0.497
274	Amyotrophic lateral sclerosis	Interleukin-33 levels	90274812	|| id:ebi-a-GCST90027164	Simple mode	14	0.0570683	0.0956774	0.561108	1.05873	0.877692	1.27711	12.5735	12	0.400788	-0.000890919	0.929318	0.497
275	Amyotrophic lateral sclerosis	Interleukin-33 levels	90274812	|| id:ebi-a-GCST90027164	Weighted mode	14	0.093297	0.0731845	0.224688	1.09779	0.951092	1.26711	12.5735	12	0.400788	-0.000890919	0.929318	0.497
276	Amyotrophic lateral sclerosis	Interleukin-4 levels	90274813	|| id:ebi-a-GCST90027164	MR Egger	14	-0.050825	0.0852081	0.561938	0.950445	0.80426	1.1232	7.13905	12	0.848289	0.00607058	0.546176	0.856
277	Amyotrophic lateral sclerosis	Interleukin-4 levels	90274813	|| id:ebi-a-GCST90027164	Weighted median	14	-0.000401013	0.0534444	0.994013	0.999599	0.900188	1.10999	7.13905	12	0.848289	0.00607058	0.546176	0.856
278	Amyotrophic lateral sclerosis	Interleukin-4 levels	90274813	|| id:ebi-a-GCST90027164	Inverse variance weighted	14	-0.00441689	0.0409479	0.914102	0.995593	0.918811	1.07879	7.13905	12	0.848289	0.00607058	0.546176	0.856
279	Amyotrophic lateral sclerosis	Interleukin-4 levels	90274813	|| id:ebi-a-GCST90027164	Simple mode	14	-0.00350333	0.0809515	0.966138	0.996503	0.850298	1.16785	7.13905	12	0.848289	0.00607058	0.546176	0.856
280	Amyotrophic lateral sclerosis	Interleukin-4 levels	90274813	|| id:ebi-a-GCST90027164	Weighted mode	14	0.00595463	0.0693813	0.932914	1.00597	0.878067	1.15251	7.13905	12	0.848289	0.00607058	0.546176	0.856
281	Amyotrophic lateral sclerosis	Interleukin-5 levels	90274814	|| id:ebi-a-GCST90027164	MR Egger	14	-0.0788079	0.0852081	0.37325	0.924217	0.782066	1.09221	10.2717	12	0.592142	-0.00127387	0.898468	0.686
282	Amyotrophic lateral sclerosis	Interleukin-5 levels	90274814	|| id:ebi-a-GCST90027164	Weighted median	14	-0.0467503	0.0546493	0.392296	0.954326	0.85739	1.06222	10.2717	12	0.592142	-0.00127387	0.898468	0.686
283	Amyotrophic lateral sclerosis	Interleukin-5 levels	90274814	|| id:ebi-a-GCST90027164	Inverse variance weighted	14	-0.0885463	0.0409479	0.0305861	0.915261	0.844674	0.991746	10.2717	12	0.592142	-0.00127387	0.898468	0.686
284	Amyotrophic lateral sclerosis	Interleukin-5 levels	90274814	|| id:ebi-a-GCST90027164	Simple mode	14	-0.0382184	0.0932824	0.688692	0.962503	0.801675	1.15559	10.2717	12	0.592142	-0.00127387	0.898468	0.686
285	Amyotrophic lateral sclerosis	Interleukin-5 levels	90274814	|| id:ebi-a-GCST90027164	Weighted mode	14	-0.0291354	0.0779966	0.714762	0.971285	0.833594	1.13172	10.2717	12	0.592142	-0.00127387	0.898468	0.686
286	Amyotrophic lateral sclerosis	Interleukin-6 levels	90274815	|| id:ebi-a-GCST90027164	MR Egger	14	0.116644	0.0977962	0.256027	1.12372	0.92771	1.36114	19.9954	12	0.0671722	-0.0183951	0.125603	0.03
287	Amyotrophic lateral sclerosis	Interleukin-6 levels	90274815	|| id:ebi-a-GCST90027164	Weighted median	14	-0.00577415	0.0523287	0.912137	0.994242	0.897324	1.10163	19.9954	12	0.0671722	-0.0183951	0.125603	0.03
288	Amyotrophic lateral sclerosis	Interleukin-6 levels	90274815	|| id:ebi-a-GCST90027164	Inverse variance weighted	14	-0.0245987	0.049943	0.622341	0.975701	0.884717	1.07604	19.9954	12	0.0671722	-0.0183951	0.125603	0.03
289	Amyotrophic lateral sclerosis	Interleukin-6 levels	90274815	|| id:ebi-a-GCST90027164	Simple mode	14	-0.0571032	0.0899689	0.536635	0.944497	0.791803	1.12664	19.9954	12	0.0671722	-0.0183951	0.125603	0.03
290	Amyotrophic lateral sclerosis	Interleukin-6 levels	90274815	|| id:ebi-a-GCST90027164	Weighted mode	14	-0.000589017	0.0662379	0.99304	0.999411	0.877731	1.13796	19.9954	12	0.0671722	-0.0183951	0.125603	0.03
291	Amyotrophic lateral sclerosis	Interleukin-7 levels	90274816	|| id:ebi-a-GCST90027164	MR Egger	14	-0.0773067	0.0925277	0.419762	0.925606	0.772085	1.10965	17.6399	12	0.12707	0.0127996	0.248345	0.148
292	Amyotrophic lateral sclerosis	Interleukin-7 levels	90274816	|| id:ebi-a-GCST90027164	Weighted median	14	0.00224166	0.0505921	0.964659	1.00224	0.90763	1.10672	17.6399	12	0.12707	0.0127996	0.248345	0.148
293	Amyotrophic lateral sclerosis	Interleukin-7 levels	90274816	|| id:ebi-a-GCST90027164	Inverse variance weighted	14	0.0213035	0.0450252	0.636109	1.02153	0.935246	1.11578	17.6399	12	0.12707	0.0127996	0.248345	0.148
294	Amyotrophic lateral sclerosis	Interleukin-7 levels	90274816	|| id:ebi-a-GCST90027164	Simple mode	14	0.0109069	0.0778592	0.89074	1.01097	0.867884	1.17764	17.6399	12	0.12707	0.0127996	0.248345	0.148
295	Amyotrophic lateral sclerosis	Interleukin-7 levels	90274816	|| id:ebi-a-GCST90027164	Weighted mode	14	0.00385498	0.0615463	0.95101	1.00386	0.889785	1.13257	17.6399	12	0.12707	0.0127996	0.248345	0.148
296	Amyotrophic lateral sclerosis	Interleukin-8 levels	90274817	|| id:ebi-a-GCST90027164	MR Egger	14	-0.0638088	0.0796043	0.438384	0.938184	0.802653	1.0966	13.2476	12	0.351304	0.0113457	0.235671	0.349
297	Amyotrophic lateral sclerosis	Interleukin-8 levels	90274817	|| id:ebi-a-GCST90027164	Weighted median	14	-0.0162907	0.0504094	0.746569	0.983841	0.891283	1.08601	13.2476	12	0.351304	0.0113457	0.235671	0.349
298	Amyotrophic lateral sclerosis	Interleukin-8 levels	90274817	|| id:ebi-a-GCST90027164	Inverse variance weighted	14	0.023383	0.0390131	0.548931	1.02366	0.948302	1.105	13.2476	12	0.351304	0.0113457	0.235671	0.349
299	Amyotrophic lateral sclerosis	Interleukin-8 levels	90274817	|| id:ebi-a-GCST90027164	Simple mode	14	-0.0557516	0.0726966	0.456839	0.945774	0.820175	1.09061	13.2476	12	0.351304	0.0113457	0.235671	0.349
300	Amyotrophic lateral sclerosis	Interleukin-8 levels	90274817	|| id:ebi-a-GCST90027164	Weighted mode	14	-0.0321123	0.0594746	0.598371	0.968398	0.861843	1.08813	13.2476	12	0.351304	0.0113457	0.235671	0.349
301	Amyotrophic lateral sclerosis	Latency-associated peptide transforming growth factor beta 1 levels	90274818	|| id:ebi-a-GCST90027164	MR Egger	14	-0.0581304	0.0753547	0.455379	0.943527	0.813975	1.0937	3.78298	12	0.987042	0.0133881	0.145669	0.954
302	Amyotrophic lateral sclerosis	Latency-associated peptide transforming growth factor beta 1 levels	90274818	|| id:ebi-a-GCST90027164	Weighted median	14	0.0325785	0.0464365	0.482947	1.03312	0.943238	1.13156	3.78298	12	0.987042	0.0133881	0.145669	0.954
303	Amyotrophic lateral sclerosis	Latency-associated peptide transforming growth factor beta 1 levels	90274818	|| id:ebi-a-GCST90027164	Inverse variance weighted	14	0.0448519	0.0360303	0.213191	1.04587	0.974562	1.1224	3.78298	12	0.987042	0.0133881	0.145669	0.954
304	Amyotrophic lateral sclerosis	Latency-associated peptide transforming growth factor beta 1 levels	90274818	|| id:ebi-a-GCST90027164	Simple mode	14	0.0102569	0.0774556	0.896677	1.01031	0.868007	1.17594	3.78298	12	0.987042	0.0133881	0.145669	0.954
305	Amyotrophic lateral sclerosis	Latency-associated peptide transforming growth factor beta 1 levels	90274818	|| id:ebi-a-GCST90027164	Weighted mode	14	-0.000275844	0.0637719	0.996614	0.999724	0.88226	1.13283	3.78298	12	0.987042	0.0133881	0.145669	0.954
306	Amyotrophic lateral sclerosis	Leukemia inhibitory factor levels	90274819	|| id:ebi-a-GCST90027164	MR Egger	14	0.048419	0.0843831	0.5767	1.04961	0.88961	1.23839	5.78847	12	0.926367	-0.00356504	0.718618	0.946
307	Amyotrophic lateral sclerosis	Leukemia inhibitory factor levels	90274819	|| id:ebi-a-GCST90027164	Weighted median	14	0.0257514	0.0532061	0.628391	1.02609	0.924472	1.13887	5.78847	12	0.926367	-0.00356504	0.718618	0.946
308	Amyotrophic lateral sclerosis	Leukemia inhibitory factor levels	90274819	|| id:ebi-a-GCST90027164	Inverse variance weighted	14	0.0210936	0.0404252	0.601815	1.02132	0.943518	1.10553	5.78847	12	0.926367	-0.00356504	0.718618	0.946
309	Amyotrophic lateral sclerosis	Leukemia inhibitory factor levels	90274819	|| id:ebi-a-GCST90027164	Simple mode	14	0.0253811	0.0870431	0.775199	1.02571	0.864829	1.21651	5.78847	12	0.926367	-0.00356504	0.718618	0.946
310	Amyotrophic lateral sclerosis	Leukemia inhibitory factor levels	90274819	|| id:ebi-a-GCST90027164	Weighted mode	14	0.0398217	0.0741534	0.600326	1.04063	0.899857	1.20341	5.78847	12	0.926367	-0.00356504	0.718618	0.946
311	Amyotrophic lateral sclerosis	Leukemia inhibitory factor receptor levels	90274820	|| id:ebi-a-GCST90027164	MR Egger	14	-0.108828	0.0873011	0.236338	0.896885	0.755831	1.06426	13.7886	12	0.314412	0.0121003	0.249102	0.289
312	Amyotrophic lateral sclerosis	Leukemia inhibitory factor receptor levels	90274820	|| id:ebi-a-GCST90027164	Weighted median	14	-0.0340122	0.0567109	0.548675	0.96656	0.864879	1.08019	13.7886	12	0.314412	0.0121003	0.249102	0.289
313	Amyotrophic lateral sclerosis	Leukemia inhibitory factor receptor levels	90274820	|| id:ebi-a-GCST90027164	Inverse variance weighted	14	-0.0157845	0.0422256	0.708543	0.984339	0.906153	1.06927	13.7886	12	0.314412	0.0121003	0.249102	0.289
314	Amyotrophic lateral sclerosis	Leukemia inhibitory factor receptor levels	90274820	|| id:ebi-a-GCST90027164	Simple mode	14	-0.0122163	0.0981032	0.902805	0.987858	0.815056	1.1973	13.7886	12	0.314412	0.0121003	0.249102	0.289
315	Amyotrophic lateral sclerosis	Leukemia inhibitory factor receptor levels	90274820	|| id:ebi-a-GCST90027164	Weighted mode	14	-0.0435624	0.0628569	0.500479	0.957373	0.846401	1.08289	13.7886	12	0.314412	0.0121003	0.249102	0.289
316	Amyotrophic lateral sclerosis	Monocyte chemoattractant protein-1 levels	90274821	|| id:ebi-a-GCST90027164	MR Egger	14	-0.0024622	0.0927774	0.979264	0.997541	0.831681	1.19648	18.0583	12	0.113931	0.00480996	0.657849	0.166
317	Amyotrophic lateral sclerosis	Monocyte chemoattractant protein-1 levels	90274821	|| id:ebi-a-GCST90027164	Weighted median	14	0.000869745	0.0500247	0.986128	1.00087	0.907394	1.10398	18.0583	12	0.113931	0.00480996	0.657849	0.166
318	Amyotrophic lateral sclerosis	Monocyte chemoattractant protein-1 levels	90274821	|| id:ebi-a-GCST90027164	Inverse variance weighted	14	0.0345236	0.0430545	0.422635	1.03513	0.95136	1.12627	18.0583	12	0.113931	0.00480996	0.657849	0.166
319	Amyotrophic lateral sclerosis	Monocyte chemoattractant protein-1 levels	90274821	|| id:ebi-a-GCST90027164	Simple mode	14	0.0151222	0.0862847	0.863576	1.01524	0.857276	1.2023	18.0583	12	0.113931	0.00480996	0.657849	0.166
320	Amyotrophic lateral sclerosis	Monocyte chemoattractant protein-1 levels	90274821	|| id:ebi-a-GCST90027164	Weighted mode	14	-0.0132539	0.0666038	0.845345	0.986834	0.866063	1.12445	18.0583	12	0.113931	0.00480996	0.657849	0.166
321	Amyotrophic lateral sclerosis	Monocyte chemoattractant protein 2 levels	90274822	|| id:ebi-a-GCST90027164	MR Egger	14	-0.035799	0.0780532	0.654682	0.964834	0.827966	1.12433	12.5228	12	0.404654	0.00479027	0.600787	0.497
322	Amyotrophic lateral sclerosis	Monocyte chemoattractant protein 2 levels	90274822	|| id:ebi-a-GCST90027164	Weighted median	14	0.00218246	0.0484165	0.964046	1.00218	0.911454	1.10195	12.5228	12	0.404654	0.00479027	0.600787	0.497
323	Amyotrophic lateral sclerosis	Monocyte chemoattractant protein 2 levels	90274822	|| id:ebi-a-GCST90027164	Inverse variance weighted	14	0.00103299	0.0365702	0.977465	1.00103	0.931793	1.07542	12.5228	12	0.404654	0.00479027	0.600787	0.497
324	Amyotrophic lateral sclerosis	Monocyte chemoattractant protein 2 levels	90274822	|| id:ebi-a-GCST90027164	Simple mode	14	0.0107799	0.0718602	0.883058	1.01084	0.878037	1.16372	12.5228	12	0.404654	0.00479027	0.600787	0.497
325	Amyotrophic lateral sclerosis	Monocyte chemoattractant protein 2 levels	90274822	|| id:ebi-a-GCST90027164	Weighted mode	14	-0.00270591	0.0630083	0.966398	0.997298	0.881437	1.12839	12.5228	12	0.404654	0.00479027	0.600787	0.497
326	Amyotrophic lateral sclerosis	Monocyte chemoattractant protein-3 levels	90274823	|| id:ebi-a-GCST90027164	MR Egger	14	-0.131225	0.0965256	0.198993	0.877021	0.725848	1.05968	15.6337	12	0.208597	0.0132781	0.254217	0.198
327	Amyotrophic lateral sclerosis	Monocyte chemoattractant protein-3 levels	90274823	|| id:ebi-a-GCST90027164	Weighted median	14	-0.0495171	0.0584619	0.396997	0.951689	0.848655	1.06723	15.6337	12	0.208597	0.0132781	0.254217	0.198
328	Amyotrophic lateral sclerosis	Monocyte chemoattractant protein-3 levels	90274823	|| id:ebi-a-GCST90027164	Inverse variance weighted	14	-0.0299347	0.0472793	0.526637	0.970509	0.884616	1.06474	15.6337	12	0.208597	0.0132781	0.254217	0.198
329	Amyotrophic lateral sclerosis	Monocyte chemoattractant protein-3 levels	90274823	|| id:ebi-a-GCST90027164	Simple mode	14	-0.0579252	0.103804	0.58631	0.94372	0.769987	1.15665	15.6337	12	0.208597	0.0132781	0.254217	0.198
330	Amyotrophic lateral sclerosis	Monocyte chemoattractant protein-3 levels	90274823	|| id:ebi-a-GCST90027164	Weighted mode	14	-0.0737877	0.0749086	0.342585	0.928869	0.802031	1.07577	15.6337	12	0.208597	0.0132781	0.254217	0.198
331	Amyotrophic lateral sclerosis	Monocyte chemoattractant protein-4 levels	90274824	|| id:ebi-a-GCST90027164	MR Egger	14	-0.0442404	0.0757348	0.569939	0.956724	0.824745	1.10982	7.57057	12	0.817725	0.00769015	0.39172	0.84
332	Amyotrophic lateral sclerosis	Monocyte chemoattractant protein-4 levels	90274824	|| id:ebi-a-GCST90027164	Weighted median	14	0.010832	0.0475389	0.819759	1.01089	0.920955	1.10961	7.57057	12	0.817725	0.00769015	0.39172	0.84
333	Amyotrophic lateral sclerosis	Monocyte chemoattractant protein-4 levels	90274824	|| id:ebi-a-GCST90027164	Inverse variance weighted	14	0.0148371	0.0362622	0.682421	1.01495	0.945315	1.08971	7.57057	12	0.817725	0.00769015	0.39172	0.84
334	Amyotrophic lateral sclerosis	Monocyte chemoattractant protein-4 levels	90274824	|| id:ebi-a-GCST90027164	Simple mode	14	0.0195693	0.0685143	0.779667	1.01976	0.891617	1.16632	7.57057	12	0.817725	0.00769015	0.39172	0.84
335	Amyotrophic lateral sclerosis	Monocyte chemoattractant protein-4 levels	90274824	|| id:ebi-a-GCST90027164	Weighted mode	14	0.0132711	0.0578652	0.82217	1.01336	0.904706	1.13506	7.57057	12	0.817725	0.00769015	0.39172	0.84
336	Amyotrophic lateral sclerosis	Macrophage inflammatory protein 1a levels	90274825	|| id:ebi-a-GCST90027164	MR Egger	14	0.0225537	0.0755356	0.770365	1.02281	0.882059	1.18602	10.7202	12	0.553041	-0.00254697	0.773071	0.59
337	Amyotrophic lateral sclerosis	Macrophage inflammatory protein 1a levels	90274825	|| id:ebi-a-GCST90027164	Weighted median	14	-0.00487053	0.0509894	0.923901	0.995141	0.900496	1.09973	10.7202	12	0.553041	-0.00254697	0.773071	0.59
338	Amyotrophic lateral sclerosis	Macrophage inflammatory protein 1a levels	90274825	|| id:ebi-a-GCST90027164	Inverse variance weighted	14	0.00300001	0.0362034	0.933959	1.003	0.934299	1.07676	10.7202	12	0.553041	-0.00254697	0.773071	0.59
339	Amyotrophic lateral sclerosis	Macrophage inflammatory protein 1a levels	90274825	|| id:ebi-a-GCST90027164	Simple mode	14	-0.0108197	0.0960039	0.91199	0.989239	0.81956	1.19405	10.7202	12	0.553041	-0.00254697	0.773071	0.59
340	Amyotrophic lateral sclerosis	Macrophage inflammatory protein 1a levels	90274825	|| id:ebi-a-GCST90027164	Weighted mode	14	-0.0601993	0.0778571	0.453233	0.941577	0.808318	1.0968	10.7202	12	0.553041	-0.00254697	0.773071	0.59
341	Amyotrophic lateral sclerosis	Matrix metalloproteinase-1 levels	90274826	|| id:ebi-a-GCST90027164	MR Egger	14	-0.154582	0.0852114	0.0947272	0.856773	0.724991	1.01251	14.8268	12	0.251043	0.0137874	0.181852	0.168
342	Amyotrophic lateral sclerosis	Matrix metalloproteinase-1 levels	90274826	|| id:ebi-a-GCST90027164	Weighted median	14	7.64242e-05	0.0530384	0.99885	1.00008	0.901335	1.10964	14.8268	12	0.251043	0.0137874	0.181852	0.168
343	Amyotrophic lateral sclerosis	Matrix metalloproteinase-1 levels	90274826	|| id:ebi-a-GCST90027164	Inverse variance weighted	14	-0.0485865	0.0423876	0.251695	0.952575	0.876633	1.0351	14.8268	12	0.251043	0.0137874	0.181852	0.168
344	Amyotrophic lateral sclerosis	Matrix metalloproteinase-1 levels	90274826	|| id:ebi-a-GCST90027164	Simple mode	14	-0.0275799	0.100108	0.787261	0.972797	0.799482	1.18368	14.8268	12	0.251043	0.0137874	0.181852	0.168
345	Amyotrophic lateral sclerosis	Matrix metalloproteinase-1 levels	90274826	|| id:ebi-a-GCST90027164	Weighted mode	14	-0.0987841	0.0863592	0.273302	0.905938	0.764871	1.07302	14.8268	12	0.251043	0.0137874	0.181852	0.168
346	Amyotrophic lateral sclerosis	Matrix metalloproteinase-10 levels	90274827	|| id:ebi-a-GCST90027164	MR Egger	14	-0.0766735	0.105862	0.482777	0.926192	0.752644	1.13976	23.3321	12	0.0250351	0.0133805	0.290055	0.019
347	Amyotrophic lateral sclerosis	Matrix metalloproteinase-10 levels	90274827	|| id:ebi-a-GCST90027164	Weighted median	14	0.00435069	0.0505823	0.931457	1.00436	0.909563	1.10904	23.3321	12	0.0250351	0.0133805	0.290055	0.019
348	Amyotrophic lateral sclerosis	Matrix metalloproteinase-10 levels	90274827	|| id:ebi-a-GCST90027164	Inverse variance weighted	14	0.0261368	0.0512211	0.60986	1.02648	0.928433	1.13488	23.3321	12	0.0250351	0.0133805	0.290055	0.019
349	Amyotrophic lateral sclerosis	Matrix metalloproteinase-10 levels	90274827	|| id:ebi-a-GCST90027164	Simple mode	14	0.109965	0.0816883	0.20126	1.11624	0.951092	1.31006	23.3321	12	0.0250351	0.0133805	0.290055	0.019
350	Amyotrophic lateral sclerosis	Matrix metalloproteinase-10 levels	90274827	|| id:ebi-a-GCST90027164	Weighted mode	14	0.00644494	0.0652201	0.92279	1.00647	0.885692	1.14371	23.3321	12	0.0250351	0.0133805	0.290055	0.019
351	Amyotrophic lateral sclerosis	Neurturin levels	90274828	|| id:ebi-a-GCST90027164	MR Egger	14	0.0522339	0.096212	0.597136	1.05362	0.872544	1.27228	15.7922	12	0.20094	-0.00232416	0.836506	0.242
352	Amyotrophic lateral sclerosis	Neurturin levels	90274828	|| id:ebi-a-GCST90027164	Weighted median	14	0.0259351	0.0568	0.647956	1.02627	0.918151	1.14713	15.7922	12	0.20094	-0.00232416	0.836506	0.242
353	Amyotrophic lateral sclerosis	Neurturin levels	90274828	|| id:ebi-a-GCST90027164	Inverse variance weighted	14	0.0344188	0.0443303	0.437503	1.03502	0.948884	1.12897	15.7922	12	0.20094	-0.00232416	0.836506	0.242
354	Amyotrophic lateral sclerosis	Neurturin levels	90274828	|| id:ebi-a-GCST90027164	Simple mode	14	-0.0137962	0.109846	0.901973	0.986298	0.795253	1.22324	15.7922	12	0.20094	-0.00232416	0.836506	0.242
355	Amyotrophic lateral sclerosis	Neurturin levels	90274828	|| id:ebi-a-GCST90027164	Weighted mode	14	0.0736218	0.0871093	0.413304	1.0764	0.907454	1.2768	15.7922	12	0.20094	-0.00232416	0.836506	0.242
356	Amyotrophic lateral sclerosis	Neurotrophin-3 levels	90274829	|| id:ebi-a-GCST90027164	MR Egger	14	0.0401223	0.0753401	0.604068	1.04094	0.898037	1.20658	6.39164	12	0.895068	0.00292509	0.739568	0.92
357	Amyotrophic lateral sclerosis	Neurotrophin-3 levels	90274829	|| id:ebi-a-GCST90027164	Weighted median	14	0.0430458	0.0498198	0.387571	1.04399	0.946863	1.15107	6.39164	12	0.895068	0.00292509	0.739568	0.92
358	Amyotrophic lateral sclerosis	Neurotrophin-3 levels	90274829	|| id:ebi-a-GCST90027164	Inverse variance weighted	14	0.0626469	0.0359584	0.0814723	1.06465	0.992199	1.14239	6.39164	12	0.895068	0.00292509	0.739568	0.92
359	Amyotrophic lateral sclerosis	Neurotrophin-3 levels	90274829	|| id:ebi-a-GCST90027164	Simple mode	14	0.0312353	0.0799254	0.70227	1.03173	0.882128	1.2067	6.39164	12	0.895068	0.00292509	0.739568	0.92
360	Amyotrophic lateral sclerosis	Neurotrophin-3 levels	90274829	|| id:ebi-a-GCST90027164	Weighted mode	14	0.0347128	0.0740744	0.647101	1.03532	0.895411	1.1971	6.39164	12	0.895068	0.00292509	0.739568	0.92
361	Amyotrophic lateral sclerosis	Osteoprotegerin levels	90274830	|| id:ebi-a-GCST90027164	MR Egger	14	0.0605533	0.07786	0.451796	1.06242	0.912057	1.23758	13.9575	12	0.303431	-0.0034241	0.707314	0.297
362	Amyotrophic lateral sclerosis	Osteoprotegerin levels	90274830	|| id:ebi-a-GCST90027164	Weighted median	14	0.0892514	0.0514079	0.0825388	1.09336	0.988558	1.20926	13.9575	12	0.303431	-0.0034241	0.707314	0.297
363	Amyotrophic lateral sclerosis	Osteoprotegerin levels	90274830	|| id:ebi-a-GCST90027164	Inverse variance weighted	14	0.0342741	0.0360618	0.341896	1.03487	0.964248	1.11066	13.9575	12	0.303431	-0.0034241	0.707314	0.297
364	Amyotrophic lateral sclerosis	Osteoprotegerin levels	90274830	|| id:ebi-a-GCST90027164	Simple mode	14	0.132273	0.0964377	0.193399	1.14142	0.944835	1.37891	13.9575	12	0.303431	-0.0034241	0.707314	0.297
365	Amyotrophic lateral sclerosis	Osteoprotegerin levels	90274830	|| id:ebi-a-GCST90027164	Weighted mode	14	0.114341	0.0884058	0.218395	1.12113	0.942769	1.33325	13.9575	12	0.303431	-0.0034241	0.707314	0.297
366	Amyotrophic lateral sclerosis	Oncostatin-M levels	90274831	|| id:ebi-a-GCST90027164	MR Egger	14	-0.0397413	0.0762036	0.611499	0.961038	0.827703	1.11585	9.64014	12	0.647497	0.00125372	0.887969	0.723
367	Amyotrophic lateral sclerosis	Oncostatin-M levels	90274831	|| id:ebi-a-GCST90027164	Weighted median	14	-0.0525336	0.0496738	0.290251	0.948822	0.860799	1.04585	9.64014	12	0.647497	0.00125372	0.887969	0.723
368	Amyotrophic lateral sclerosis	Oncostatin-M levels	90274831	|| id:ebi-a-GCST90027164	Inverse variance weighted	14	-0.0301178	0.0365292	0.409665	0.970331	0.903287	1.04235	9.64014	12	0.647497	0.00125372	0.887969	0.723
369	Amyotrophic lateral sclerosis	Oncostatin-M levels	90274831	|| id:ebi-a-GCST90027164	Simple mode	14	-0.0297224	0.0780238	0.709401	0.970715	0.83306	1.13112	9.64014	12	0.647497	0.00125372	0.887969	0.723
370	Amyotrophic lateral sclerosis	Oncostatin-M levels	90274831	|| id:ebi-a-GCST90027164	Weighted mode	14	-0.0535229	0.0670399	0.438995	0.947884	0.83117	1.08099	9.64014	12	0.647497	0.00125372	0.887969	0.723
371	Amyotrophic lateral sclerosis	Programmed cell death 1 ligand 1 levels	90274832	|| id:ebi-a-GCST90027164	MR Egger	14	0.0543033	0.100965	0.60052	1.0558	0.866244	1.28685	21.8209	12	0.0395769	-0.00550138	0.641685	0.056
372	Amyotrophic lateral sclerosis	Programmed cell death 1 ligand 1 levels	90274832	|| id:ebi-a-GCST90027164	Weighted median	14	0.0469173	0.0574888	0.414436	1.04804	0.936355	1.17304	21.8209	12	0.0395769	-0.00550138	0.641685	0.056
373	Amyotrophic lateral sclerosis	Programmed cell death 1 ligand 1 levels	90274832	|| id:ebi-a-GCST90027164	Inverse variance weighted	14	0.0119662	0.0467941	0.798167	1.01204	0.923347	1.10925	21.8209	12	0.0395769	-0.00550138	0.641685	0.056
374	Amyotrophic lateral sclerosis	Programmed cell death 1 ligand 1 levels	90274832	|| id:ebi-a-GCST90027164	Simple mode	14	0.132167	0.127839	0.320056	1.1413	0.888342	1.46628	21.8209	12	0.0395769	-0.00550138	0.641685	0.056
375	Amyotrophic lateral sclerosis	Programmed cell death 1 ligand 1 levels	90274832	|| id:ebi-a-GCST90027164	Weighted mode	14	-0.149546	0.106269	0.182815	0.861099	0.69919	1.0605	21.8209	12	0.0395769	-0.00550138	0.641685	0.056
376	Amyotrophic lateral sclerosis	Stem cell factor levels	90274833	|| id:ebi-a-GCST90027164	MR Egger	14	-0.156525	0.0966091	0.131156	0.85511	0.707598	1.03337	19.6519	12	0.0739651	0.0302646	0.0178086	0.004
377	Amyotrophic lateral sclerosis	Stem cell factor levels	90274833	|| id:ebi-a-GCST90027164	Weighted median	14	0.0447376	0.0597308	0.453864	1.04575	0.93022	1.17564	19.6519	12	0.0739651	0.0302646	0.0178086	0.004
378	Amyotrophic lateral sclerosis	Stem cell factor levels	90274833	|| id:ebi-a-GCST90027164	Inverse variance weighted	14	0.0761302	0.0567369	0.179657	1.0791	0.965534	1.20603	19.6519	12	0.0739651	0.0302646	0.0178086	0.004
379	Amyotrophic lateral sclerosis	Stem cell factor levels	90274833	|| id:ebi-a-GCST90027164	Simple mode	14	-0.0131763	0.115873	0.911203	0.98691	0.786402	1.23854	19.6519	12	0.0739651	0.0302646	0.0178086	0.004
380	Amyotrophic lateral sclerosis	Stem cell factor levels	90274833	|| id:ebi-a-GCST90027164	Weighted mode	14	-0.0483294	0.0837479	0.573742	0.95282	0.80858	1.12279	19.6519	12	0.0739651	0.0302646	0.0178086	0.004
381	Amyotrophic lateral sclerosis	SIR2-like protein 2 levels	90274834	|| id:ebi-a-GCST90027164	MR Egger	14	-0.0788666	0.0855421	0.374713	0.924163	0.781509	1.09286	15.2213	12	0.229557	0.00794153	0.432311	0.248
382	Amyotrophic lateral sclerosis	SIR2-like protein 2 levels	90274834	|| id:ebi-a-GCST90027164	Weighted median	14	-0.0240131	0.0521163	0.644971	0.976273	0.881473	1.08127	15.2213	12	0.229557	0.00794153	0.432311	0.248
383	Amyotrophic lateral sclerosis	SIR2-like protein 2 levels	90274834	|| id:ebi-a-GCST90027164	Inverse variance weighted	14	-0.0178453	0.0404176	0.658834	0.982313	0.907498	1.0633	15.2213	12	0.229557	0.00794153	0.432311	0.248
384	Amyotrophic lateral sclerosis	SIR2-like protein 2 levels	90274834	|| id:ebi-a-GCST90027164	Simple mode	14	-0.15124	0.102286	0.163067	0.859641	0.703476	1.05047	15.2213	12	0.229557	0.00794153	0.432311	0.248
385	Amyotrophic lateral sclerosis	SIR2-like protein 2 levels	90274834	|| id:ebi-a-GCST90027164	Weighted mode	14	-0.0689801	0.0831116	0.421536	0.933345	0.793042	1.09847	15.2213	12	0.229557	0.00794153	0.432311	0.248
386	Amyotrophic lateral sclerosis	Signaling lymphocytic activation molecule levels	90274835	|| id:ebi-a-GCST90027164	MR Egger	14	-0.0530067	0.119515	0.665283	0.948374	0.75032	1.1987	29.7569	12	0.00303753	0.00673858	0.630501	0.007
387	Amyotrophic lateral sclerosis	Signaling lymphocytic activation molecule levels	90274835	|| id:ebi-a-GCST90027164	Weighted median	14	-0.0280516	0.0537711	0.60189	0.972338	0.875077	1.08041	29.7569	12	0.00303753	0.00673858	0.630501	0.007
388	Amyotrophic lateral sclerosis	Signaling lymphocytic activation molecule levels	90274835	|| id:ebi-a-GCST90027164	Inverse variance weighted	14	-0.00120673	0.0554998	0.982653	0.998794	0.895846	1.11357	29.7569	12	0.00303753	0.00673858	0.630501	0.007
389	Amyotrophic lateral sclerosis	Signaling lymphocytic activation molecule levels	90274835	|| id:ebi-a-GCST90027164	Simple mode	14	-0.024607	0.0913291	0.791826	0.975693	0.815779	1.16696	29.7569	12	0.00303753	0.00673858	0.630501	0.007
390	Amyotrophic lateral sclerosis	Signaling lymphocytic activation molecule levels	90274835	|| id:ebi-a-GCST90027164	Weighted mode	14	-0.0524311	0.0625258	0.416874	0.94892	0.839472	1.07264	29.7569	12	0.00303753	0.00673858	0.630501	0.007
391	Amyotrophic lateral sclerosis	Sulfotransferase 1A1 levels	90274836	|| id:ebi-a-GCST90027164	MR Egger	14	-0.182458	0.0858998	0.0551331	0.83322	0.704109	0.986004	6.68293	12	0.877836	0.0154557	0.142783	0.77
392	Amyotrophic lateral sclerosis	Sulfotransferase 1A1 levels	90274836	|| id:ebi-a-GCST90027164	Weighted median	14	-0.0755444	0.0556597	0.1747	0.927239	0.831406	1.03412	6.68293	12	0.877836	0.0154557	0.142783	0.77
393	Amyotrophic lateral sclerosis	Sulfotransferase 1A1 levels	90274836	|| id:ebi-a-GCST90027164	Inverse variance weighted	14	-0.0643654	0.0413392	0.119469	0.937662	0.864685	1.0168	6.68293	12	0.877836	0.0154557	0.142783	0.77
394	Amyotrophic lateral sclerosis	Sulfotransferase 1A1 levels	90274836	|| id:ebi-a-GCST90027164	Simple mode	14	0.00549403	0.0885141	0.951452	1.00551	0.845359	1.196	6.68293	12	0.877836	0.0154557	0.142783	0.77
395	Amyotrophic lateral sclerosis	Sulfotransferase 1A1 levels	90274836	|| id:ebi-a-GCST90027164	Weighted mode	14	-0.0480917	0.0703899	0.506464	0.953046	0.830227	1.09403	6.68293	12	0.877836	0.0154557	0.142783	0.77
396	Amyotrophic lateral sclerosis	STAM binding protein levels	90274837	|| id:ebi-a-GCST90027164	MR Egger	14	-0.0380858	0.0839054	0.657991	0.96263	0.816653	1.1347	14.888	12	0.247619	0.00423415	0.666498	0.329
397	Amyotrophic lateral sclerosis	STAM binding protein levels	90274837	|| id:ebi-a-GCST90027164	Weighted median	14	0.044946	0.0506284	0.374669	1.04597	0.947161	1.15509	14.888	12	0.247619	0.00423415	0.666498	0.329
398	Amyotrophic lateral sclerosis	STAM binding protein levels	90274837	|| id:ebi-a-GCST90027164	Inverse variance weighted	14	-0.00553609	0.0388849	0.886787	0.994479	0.921502	1.07324	14.888	12	0.247619	0.00423415	0.666498	0.329
399	Amyotrophic lateral sclerosis	STAM binding protein levels	90274837	|| id:ebi-a-GCST90027164	Simple mode	14	0.0407271	0.101456	0.694628	1.04157	0.853741	1.27072	14.888	12	0.247619	0.00423415	0.666498	0.329
400	Amyotrophic lateral sclerosis	STAM binding protein levels	90274837	|| id:ebi-a-GCST90027164	Weighted mode	14	0.0539108	0.070134	0.45582	1.05539	0.919843	1.21091	14.888	12	0.247619	0.00423415	0.666498	0.329
401	Amyotrophic lateral sclerosis	Transforming growth factor-alpha levels	90274838	|| id:ebi-a-GCST90027164	MR Egger	14	-0.0613332	0.0756953	0.433564	0.94051	0.810831	1.09093	2.34892	12	0.998653	0.00456932	0.606995	1
402	Amyotrophic lateral sclerosis	Transforming growth factor-alpha levels	90274838	|| id:ebi-a-GCST90027164	Weighted median	14	-0.0323047	0.0441292	0.46414	0.968212	0.887987	1.05568	2.34892	12	0.998653	0.00456932	0.606995	1
403	Amyotrophic lateral sclerosis	Transforming growth factor-alpha levels	90274838	|| id:ebi-a-GCST90027164	Inverse variance weighted	14	-0.0262346	0.0362513	0.469258	0.974107	0.907295	1.04584	2.34892	12	0.998653	0.00456932	0.606995	1
404	Amyotrophic lateral sclerosis	Transforming growth factor-alpha levels	90274838	|| id:ebi-a-GCST90027164	Simple mode	14	-0.0456221	0.072271	0.538809	0.955403	0.829217	1.10079	2.34892	12	0.998653	0.00456932	0.606995	1
405	Amyotrophic lateral sclerosis	Transforming growth factor-alpha levels	90274838	|| id:ebi-a-GCST90027164	Weighted mode	14	-0.0381548	0.063786	0.560005	0.962564	0.849442	1.09075	2.34892	12	0.998653	0.00456932	0.606995	1
406	Amyotrophic lateral sclerosis	Tumor necrosis factor levels	90274839	|| id:ebi-a-GCST90027164	MR Egger	14	-0.00512187	0.0844213	0.952621	0.994891	0.843169	1.17391	12.0091	12	0.444947	-0.00453142	0.648169	0.505
407	Amyotrophic lateral sclerosis	Tumor necrosis factor levels	90274839	|| id:ebi-a-GCST90027164	Weighted median	14	-0.0464236	0.0599008	0.438335	0.954637	0.848887	1.07356	12.0091	12	0.444947	-0.00453142	0.648169	0.505
408	Amyotrophic lateral sclerosis	Tumor necrosis factor levels	90274839	|| id:ebi-a-GCST90027164	Inverse variance weighted	14	-0.0397969	0.0404491	0.325177	0.960985	0.887739	1.04027	12.0091	12	0.444947	-0.00453142	0.648169	0.505
409	Amyotrophic lateral sclerosis	Tumor necrosis factor levels	90274839	|| id:ebi-a-GCST90027164	Simple mode	14	-0.00918904	0.105376	0.93184	0.990853	0.805956	1.21817	12.0091	12	0.444947	-0.00453142	0.648169	0.505
410	Amyotrophic lateral sclerosis	Tumor necrosis factor levels	90274839	|| id:ebi-a-GCST90027164	Weighted mode	14	-0.0310509	0.0816752	0.709954	0.969426	0.826022	1.13773	12.0091	12	0.444947	-0.00453142	0.648169	0.505
411	Amyotrophic lateral sclerosis	TNF-beta levels	90274840	|| id:ebi-a-GCST90027164	MR Egger	14	0.151976	0.209349	0.48179	1.16413	0.772327	1.7547	72.634	12	1.02651e-10	-0.0288772	0.251768	<0.001
412	Amyotrophic lateral sclerosis	TNF-beta levels	90274840	|| id:ebi-a-GCST90027164	Weighted median	14	-0.0271848	0.0597521	0.649138	0.973181	0.865629	1.0941	72.634	12	1.02651e-10	-0.0288772	0.251768	<0.001
413	Amyotrophic lateral sclerosis	TNF-beta levels	90274840	|| id:ebi-a-GCST90027164	Inverse variance weighted	14	-0.0691498	0.102228	0.498771	0.933187	0.763748	1.14022	72.634	12	1.02651e-10	-0.0288772	0.251768	<0.001
414	Amyotrophic lateral sclerosis	TNF-beta levels	90274840	|| id:ebi-a-GCST90027164	Simple mode	14	-0.0341972	0.0902613	0.710901	0.966381	0.809685	1.1534	72.634	12	1.02651e-10	-0.0288772	0.251768	<0.001
415	Amyotrophic lateral sclerosis	TNF-beta levels	90274840	|| id:ebi-a-GCST90027164	Weighted mode	14	-0.056739	0.068363	0.421538	0.944841	0.826355	1.08031	72.634	12	1.02651e-10	-0.0288772	0.251768	<0.001
416	Amyotrophic lateral sclerosis	Tumor necrosis factor receptor superfamily member 9 levels	90274841	|| id:ebi-a-GCST90027164	MR Egger	14	0.0859379	0.0952483	0.384676	1.08974	0.90416	1.31341	15.2417	12	0.228485	-0.00823286	0.465271	0.258
417	Amyotrophic lateral sclerosis	Tumor necrosis factor receptor superfamily member 9 levels	90274841	|| id:ebi-a-GCST90027164	Weighted median	14	0.0405213	0.0600671	0.49993	1.04135	0.925695	1.17146	15.2417	12	0.228485	-0.00823286	0.465271	0.258
418	Amyotrophic lateral sclerosis	Tumor necrosis factor receptor superfamily member 9 levels	90274841	|| id:ebi-a-GCST90027164	Inverse variance weighted	14	0.022924	0.0449688	0.610209	1.02319	0.936866	1.11747	15.2417	12	0.228485	-0.00823286	0.465271	0.258
419	Amyotrophic lateral sclerosis	Tumor necrosis factor receptor superfamily member 9 levels	90274841	|| id:ebi-a-GCST90027164	Simple mode	14	0.0762363	0.0938192	0.431084	1.07922	0.897943	1.29709	15.2417	12	0.228485	-0.00823286	0.465271	0.258
420	Amyotrophic lateral sclerosis	Tumor necrosis factor receptor superfamily member 9 levels	90274841	|| id:ebi-a-GCST90027164	Weighted mode	14	0.0635795	0.0845576	0.465503	1.06564	0.902891	1.25773	15.2417	12	0.228485	-0.00823286	0.465271	0.258
421	Amyotrophic lateral sclerosis	Tumor necrosis factor ligand superfamily member 14 levels	90274842	|| id:ebi-a-GCST90027164	MR Egger	14	-0.0443795	0.0851007	0.611512	0.956591	0.809631	1.13023	8.83812	12	0.716691	0.00575786	0.566504	0.801
422	Amyotrophic lateral sclerosis	Tumor necrosis factor ligand superfamily member 14 levels	90274842	|| id:ebi-a-GCST90027164	Weighted median	14	-0.0110318	0.0569968	0.846528	0.989029	0.884489	1.10592	8.83812	12	0.716691	0.00575786	0.566504	0.801
423	Amyotrophic lateral sclerosis	Tumor necrosis factor ligand superfamily member 14 levels	90274842	|| id:ebi-a-GCST90027164	Inverse variance weighted	14	-0.000383887	0.0408762	0.992507	0.999616	0.922654	1.083	8.83812	12	0.716691	0.00575786	0.566504	0.801
424	Amyotrophic lateral sclerosis	Tumor necrosis factor ligand superfamily member 14 levels	90274842	|| id:ebi-a-GCST90027164	Simple mode	14	-0.0187969	0.0865047	0.831353	0.981379	0.828328	1.16271	8.83812	12	0.716691	0.00575786	0.566504	0.801
425	Amyotrophic lateral sclerosis	Tumor necrosis factor ligand superfamily member 14 levels	90274842	|| id:ebi-a-GCST90027164	Weighted mode	14	-0.00807356	0.0727287	0.913305	0.991959	0.860173	1.14394	8.83812	12	0.716691	0.00575786	0.566504	0.801
426	Amyotrophic lateral sclerosis	TNF-related apoptosis-inducing ligand levels	90274843	|| id:ebi-a-GCST90027164	MR Egger	14	0.010001	0.104485	0.925325	1.01005	0.823008	1.2396	22.9455	12	0.0281924	-0.00432815	0.723039	0.033
427	Amyotrophic lateral sclerosis	TNF-related apoptosis-inducing ligand levels	90274843	|| id:ebi-a-GCST90027164	Weighted median	14	-0.00307092	0.0557184	0.956047	0.996934	0.893795	1.11197	22.9455	12	0.0281924	-0.00432815	0.723039	0.033
428	Amyotrophic lateral sclerosis	TNF-related apoptosis-inducing ligand levels	90274843	|| id:ebi-a-GCST90027164	Inverse variance weighted	14	-0.0233045	0.0482167	0.628863	0.976965	0.888866	1.0738	22.9455	12	0.0281924	-0.00432815	0.723039	0.033
429	Amyotrophic lateral sclerosis	TNF-related apoptosis-inducing ligand levels	90274843	|| id:ebi-a-GCST90027164	Simple mode	14	0.0814343	0.105084	0.452237	1.08484	0.882912	1.33296	22.9455	12	0.0281924	-0.00432815	0.723039	0.033
430	Amyotrophic lateral sclerosis	TNF-related apoptosis-inducing ligand levels	90274843	|| id:ebi-a-GCST90027164	Weighted mode	14	0.0492046	0.111714	0.666845	1.05044	0.843872	1.30756	22.9455	12	0.0281924	-0.00432815	0.723039	0.033
431	Amyotrophic lateral sclerosis	TNF-related activation-induced cytokine levels	90274844	|| id:ebi-a-GCST90027164	MR Egger	14	0.00963924	0.0980885	0.92334	1.00969	0.833089	1.22372	20.0363	12	0.0664033	-0.00309854	0.786803	0.065
432	Amyotrophic lateral sclerosis	TNF-related activation-induced cytokine levels	90274844	|| id:ebi-a-GCST90027164	Weighted median	14	-0.110605	0.0539973	0.0405262	0.895292	0.805381	0.995241	20.0363	12	0.0664033	-0.00309854	0.786803	0.065
433	Amyotrophic lateral sclerosis	TNF-related activation-induced cytokine levels	90274844	|| id:ebi-a-GCST90027164	Inverse variance weighted	14	-0.0141839	0.0452342	0.753851	0.985916	0.902269	1.07732	20.0363	12	0.0664033	-0.00309854	0.786803	0.065
434	Amyotrophic lateral sclerosis	TNF-related activation-induced cytokine levels	90274844	|| id:ebi-a-GCST90027164	Simple mode	14	-0.130324	0.0927102	0.183258	0.877811	0.731955	1.05273	20.0363	12	0.0664033	-0.00309854	0.786803	0.065
435	Amyotrophic lateral sclerosis	TNF-related activation-induced cytokine levels	90274844	|| id:ebi-a-GCST90027164	Weighted mode	14	-0.130324	0.0788168	0.12216	0.877811	0.752161	1.02445	20.0363	12	0.0664033	-0.00309854	0.786803	0.065
436	Amyotrophic lateral sclerosis	Thymic stromal lymphopoietin levels	90274845	|| id:ebi-a-GCST90027164	MR Egger	14	0.0445928	0.085265	0.610502	1.0456	0.884682	1.23579	10.0043	12	0.615583	-0.000106356	0.991505	0.702
437	Amyotrophic lateral sclerosis	Thymic stromal lymphopoietin levels	90274845	|| id:ebi-a-GCST90027164	Weighted median	14	0.0731854	0.0586269	0.211912	1.07593	0.959135	1.20695	10.0043	12	0.615583	-0.000106356	0.991505	0.702
438	Amyotrophic lateral sclerosis	Thymic stromal lymphopoietin levels	90274845	|| id:ebi-a-GCST90027164	Inverse variance weighted	14	0.0437797	0.0409474	0.284993	1.04475	0.96418	1.13206	10.0043	12	0.615583	-0.000106356	0.991505	0.702
439	Amyotrophic lateral sclerosis	Thymic stromal lymphopoietin levels	90274845	|| id:ebi-a-GCST90027164	Simple mode	14	0.127	0.0922107	0.191678	1.13542	0.947685	1.36034	10.0043	12	0.615583	-0.000106356	0.991505	0.702
440	Amyotrophic lateral sclerosis	Thymic stromal lymphopoietin levels	90274845	|| id:ebi-a-GCST90027164	Weighted mode	14	0.10468	0.0739324	0.180318	1.11036	0.960571	1.2835	10.0043	12	0.615583	-0.000106356	0.991505	0.702
441	Amyotrophic lateral sclerosis	Tumor necrosis factor ligand superfamily member 12 levels	90274846	|| id:ebi-a-GCST90027164	MR Egger	14	-0.015512	0.0752088	0.840052	0.984608	0.849658	1.14099	7.78698	12	0.801547	0.0140855	0.127064	0.586
442	Amyotrophic lateral sclerosis	Tumor necrosis factor ligand superfamily member 12 levels	90274846	|| id:ebi-a-GCST90027164	Weighted median	14	0.0849339	0.055217	0.124004	1.08865	0.976978	1.21308	7.78698	12	0.801547	0.0140855	0.127064	0.586
443	Amyotrophic lateral sclerosis	Tumor necrosis factor ligand superfamily member 12 levels	90274846	|| id:ebi-a-GCST90027164	Inverse variance weighted	14	0.0928368	0.0358941	0.00969816	1.09728	1.02274	1.17726	7.78698	12	0.801547	0.0140855	0.127064	0.586
444	Amyotrophic lateral sclerosis	Tumor necrosis factor ligand superfamily member 12 levels	90274846	|| id:ebi-a-GCST90027164	Simple mode	14	0.143704	0.101825	0.181645	1.15454	0.945658	1.40957	7.78698	12	0.801547	0.0140855	0.127064	0.586
445	Amyotrophic lateral sclerosis	Tumor necrosis factor ligand superfamily member 12 levels	90274846	|| id:ebi-a-GCST90027164	Weighted mode	14	-0.015734	0.0887636	0.862038	0.984389	0.827198	1.17145	7.78698	12	0.801547	0.0140855	0.127064	0.586
446	Amyotrophic lateral sclerosis	Urokinase-type plasminogen activator levels	90274847	|| id:ebi-a-GCST90027164	MR Egger	14	-0.0786666	0.117824	0.516984	0.924348	0.733739	1.16447	29.4768	12	0.00334548	0.0158776	0.260702	0.001
447	Amyotrophic lateral sclerosis	Urokinase-type plasminogen activator levels	90274847	|| id:ebi-a-GCST90027164	Weighted median	14	0.108186	0.0600217	0.0714764	1.11425	0.990587	1.25336	29.4768	12	0.00334548	0.0158776	0.260702	0.001
448	Amyotrophic lateral sclerosis	Urokinase-type plasminogen activator levels	90274847	|| id:ebi-a-GCST90027164	Inverse variance weighted	14	0.0435617	0.0570643	0.445237	1.04452	0.933995	1.16813	29.4768	12	0.00334548	0.0158776	0.260702	0.001
449	Amyotrophic lateral sclerosis	Urokinase-type plasminogen activator levels	90274847	|| id:ebi-a-GCST90027164	Simple mode	14	0.117264	0.0933583	0.231198	1.12442	0.936395	1.35019	29.4768	12	0.00334548	0.0158776	0.260702	0.001
450	Amyotrophic lateral sclerosis	Urokinase-type plasminogen activator levels	90274847	|| id:ebi-a-GCST90027164	Weighted mode	14	0.119665	0.110809	0.299805	1.12712	0.907084	1.40053	29.4768	12	0.00334548	0.0158776	0.260702	0.001
451	Amyotrophic lateral sclerosis	Vascular endothelial growth factor A levels	90274848	|| id:ebi-a-GCST90027164	MR Egger	14	0.0356536	0.0753662	0.644651	1.0363	0.893987	1.20126	10.025	12	0.613765	-0.00085646	0.922408	0.713
452	Amyotrophic lateral sclerosis	Vascular endothelial growth factor A levels	90274848	|| id:ebi-a-GCST90027164	Weighted median	14	0.0268601	0.0471549	0.56894	1.02722	0.93654	1.12669	10.025	12	0.613765	-0.00085646	0.922408	0.713
453	Amyotrophic lateral sclerosis	Vascular endothelial growth factor A levels	90274848	|| id:ebi-a-GCST90027164	Inverse variance weighted	14	0.029076	0.0361572	0.421307	1.0295	0.959069	1.10511	10.025	12	0.613765	-0.00085646	0.922408	0.713
454	Amyotrophic lateral sclerosis	Vascular endothelial growth factor A levels	90274848	|| id:ebi-a-GCST90027164	Simple mode	14	0.0372271	0.0698222	0.602912	1.03793	0.905177	1.19015	10.025	12	0.613765	-0.00085646	0.922408	0.713
455	Amyotrophic lateral sclerosis	Vascular endothelial growth factor A levels	90274848	|| id:ebi-a-GCST90027164	Weighted mode	14	0.0259377	0.0616335	0.680747	1.02628	0.909497	1.15805	10.025	12	0.613765	-0.00085646	0.922408	0.713

## Sheet: S7
Exclude rs112665079 and reperform the Mendelian randomization analysis
SNP（P < 5×10 -8）	id.exposure	id.outcome	outcome	exposure	method	nsnp	b	se	pval	OR	lower	upper
1	Adenosine Deaminase levels	ebi-a-GCST90027164	Amyotrophic lateral sclerosis || id:ebi-a-GCST90027164	90274759	MR Egger	3	-0.0413522	0.0617065	0.624136	0.959491	0.850189	1.08285
2	Adenosine Deaminase levels	ebi-a-GCST90027164	Amyotrophic lateral sclerosis || id:ebi-a-GCST90027164	90274759	Weighted median	3	-0.0274654	0.0410568	0.503521	0.972908	0.897684	1.05444
3	Adenosine Deaminase levels	ebi-a-GCST90027164	Amyotrophic lateral sclerosis || id:ebi-a-GCST90027164	90274759	Inverse variance weighted	3	-0.0083052	0.0396983	0.834286	0.991729	0.91749	1.07198
4	Adenosine Deaminase levels	ebi-a-GCST90027164	Amyotrophic lateral sclerosis || id:ebi-a-GCST90027164	90274759	Simple mode	3	-0.0273826	0.0611135	0.69797	0.972989	0.863152	1.0968
5	Adenosine Deaminase levels	ebi-a-GCST90027164	Amyotrophic lateral sclerosis || id:ebi-a-GCST90027164	90274759	Weighted mode	3	-0.0278679	0.0498658	0.632483	0.972517	0.881963	1.07237
SNP（P < 5×10 -7）	id.exposure	id.outcome	outcome	exposure	method	nsnp	b	se	pval	OR	lower	upper
1	Adenosine Deaminase levels	ebi-a-GCST90027164	Amyotrophic lateral sclerosis || id:ebi-a-GCST90027164	90274759	MR Egger	4	-0.0529186	0.0546597	0.435107	0.948457	0.8521	1.05571
2	Adenosine Deaminase levels	ebi-a-GCST90027164	Amyotrophic lateral sclerosis || id:ebi-a-GCST90027164	90274759	Weighted median	4	-0.0274048	0.0409245	0.503086	0.972967	0.897972	1.05423
3	Adenosine Deaminase levels	ebi-a-GCST90027164	Amyotrophic lateral sclerosis || id:ebi-a-GCST90027164	90274759	Inverse variance weighted	4	0.00372439	0.038687	0.923306	1.00373	0.930436	1.0828
4	Adenosine Deaminase levels	ebi-a-GCST90027164	Amyotrophic lateral sclerosis || id:ebi-a-GCST90027164	90274759	Simple mode	4	-0.0202759	0.0684018	0.786243	0.979928	0.856978	1.12052
5	Adenosine Deaminase levels	ebi-a-GCST90027164	Amyotrophic lateral sclerosis || id:ebi-a-GCST90027164	90274759	Weighted mode	4	-0.0231638	0.0455743	0.646285	0.977102	0.893607	1.0684
SNP（P < 5×10 -6）	id.exposure	id.outcome	outcome	exposure	method	nsnp	b	se	pval	OR	lower	upper
1	Adenosine Deaminase levels	ebi-a-GCST90027164	Amyotrophic lateral sclerosis || id:ebi-a-GCST90027164	90274759	MR Egger	13	-0.0300043	0.0682767	0.668842	0.970441	0.848889	1.1094
2	Adenosine Deaminase levels	ebi-a-GCST90027164	Amyotrophic lateral sclerosis || id:ebi-a-GCST90027164	90274759	Weighted median	13	-0.0274878	0.0449089	0.540485	0.972887	0.890912	1.0624
3	Adenosine Deaminase levels	ebi-a-GCST90027164	Amyotrophic lateral sclerosis || id:ebi-a-GCST90027164	90274759	Inverse variance weighted	13	0.0225049	0.0497486	0.651001	1.02276	0.927741	1.12751
4	Adenosine Deaminase levels	ebi-a-GCST90027164	Amyotrophic lateral sclerosis || id:ebi-a-GCST90027164	90274759	Simple mode	13	-0.0299107	0.074484	0.695059	0.970532	0.838702	1.12308
5	Adenosine Deaminase levels	ebi-a-GCST90027164	Amyotrophic lateral sclerosis || id:ebi-a-GCST90027164	90274759	Weighted mode	13	-0.0181116	0.0420289	0.674157	0.982051	0.904396	1.06637

## Sheet: S8
Details of Forward Mendelian randomization snp
Select snp p_value < 5e-8
	SNP	effect_allele.exposure	other_allele.exposure	effect_allele.outcome	other_allele.outcome	beta.exposure	beta.outcome	eaf.exposure	eaf.outcome	remove	palindromic	ambiguous	id.outcome	chr	pos	se.outcome	samplesize.outcome	pval.outcome	outcome	originalname.outcome	outcome.deprecated	mr_keep.outcome	data_source.outcome	proxy.outcome	target_snp.outcome	proxy_snp.outcome	target_a1.outcome	target_a2.outcome	proxy_a1.outcome	proxy_a2.outcome	V1	se.exposure	pval.exposure	samplesize.exposure	exposure	mr_keep.exposure	pval_origin.exposure	id.exposure	group	action	mr_keep	units.outcome	units.exposure	rsq.exposure	effective_n.exposure	rsq.outcome	effective_n.outcome	steiger_dir	steiger_pval
1	rs3128517	T	C	T	C	-0.0775	0.0014	0.4965	0.4997	FALSE	FALSE	FALSE	ebi-a-GCST90027164	9	90362040	0.0111	138086	0.9011	Amyotrophic lateral sclerosis || id:ebi-a-GCST90027164	Amyotrophic lateral sclerosis	Amyotrophic lateral sclerosis || ||	TRUE	igd	NA	NA	NA	NA	NA	NA	NA	41	0.0118	5.11e-11	14295	90274762	TRUE	reported	beta-nerve growth factor levels	90274762	2	TRUE	NA	NA	0.0030089	14295	1.15204e-07	138086	TRUE	5.29122e-10
2	rs6328	A	C	A	C	-0.0797	0.002	0.3498	0.3474	FALSE	FALSE	FALSE	ebi-a-GCST90027164	1	115829943	0.0116	138086	0.8658	Amyotrophic lateral sclerosis || id:ebi-a-GCST90027164	Amyotrophic lateral sclerosis	Amyotrophic lateral sclerosis || ||	TRUE	igd	NA	NA	NA	NA	NA	NA	NA	6	0.0122	6.46e-11	13224	90274762	TRUE	reported	beta-nerve growth factor levels	90274762	2	TRUE	NA	NA	0.00321736	13224	2.15278e-07	138086	TRUE	6.15963e-10
3	rs149278	T	C	T	C	-0.1882	-0.034	0.5314	0.5366	FALSE	FALSE	FALSE	ebi-a-GCST90027164	16	28561581	0.0113	138086	0.00260501	Amyotrophic lateral sclerosis || id:ebi-a-GCST90027164	Amyotrophic lateral sclerosis	Amyotrophic lateral sclerosis || ||	TRUE	igd	NA	NA	NA	NA	NA	NA	NA	331	0.0135	3.58e-44	11344	90274836	TRUE	reported	Sulfotransferase 1A1 levels	90274836	2	TRUE	NA	NA	0.0168463	11344	6.55585e-05	138086	TRUE	4.87801e-36
4	rs2731674	T	G	T	G	-0.083	0.0271	0.2653	0.2559	FALSE	FALSE	FALSE	ebi-a-GCST90027164	5	176839890	0.0185	138086	0.1433	Amyotrophic lateral sclerosis || id:ebi-a-GCST90027164	Amyotrophic lateral sclerosis	Amyotrophic lateral sclerosis || ||	TRUE	igd	NA	NA	NA	NA	NA	NA	NA	166	0.0152	4.75e-08	11790	90274836	TRUE	reported	Sulfotransferase 1A1 levels	90274836	2	TRUE	NA	NA	0.00252308	11790	1.55398e-05	138086	TRUE	1.37799e-06
5	rs66530140	T	C	T	C	-0.1678	-0.0082	0.4926	0.4975	FALSE	FALSE	FALSE	ebi-a-GCST90027164	4	187161211	0.011	138086	0.4572	Amyotrophic lateral sclerosis || id:ebi-a-GCST90027164	Amyotrophic lateral sclerosis	Amyotrophic lateral sclerosis || ||	TRUE	igd	NA	NA	NA	NA	NA	NA	NA	94	0.0136	5.64e-35	10913	90274836	TRUE	reported	Sulfotransferase 1A1 levels	90274836	2	TRUE	NA	NA	0.0137602	10913	4.02436e-06	138086	TRUE	2.34346e-31
6	rs11220462	A	G	A	G	-0.1024	-0.0274	0.1509	0.1344	FALSE	FALSE	FALSE	ebi-a-GCST90027164	11	126243952	0.0163	138086	0.0936699	Amyotrophic lateral sclerosis || id:ebi-a-GCST90027164	Amyotrophic lateral sclerosis	Amyotrophic lateral sclerosis || ||	TRUE	igd	NA	NA	NA	NA	NA	NA	NA	284	0.0161	2.01e-10	14731	90274847	TRUE	reported	Urokinase-type plasminogen activator levels	90274847	2	TRUE	NA	NA	0.00273895	14731	2.04632e-05	138086	TRUE	3.36783e-08
7	rs13299342	A	G	A	G	0.1	-0.0282	0.1744	0.1396	FALSE	FALSE	FALSE	ebi-a-GCST90027164	9	136141504	0.0159	138086	0.0769999	Amyotrophic lateral sclerosis || id:ebi-a-GCST90027164	Amyotrophic lateral sclerosis	Amyotrophic lateral sclerosis || ||	TRUE	igd	NA	NA	NA	NA	NA	NA	NA	129	0.017	4.04e-09	11781	90274847	TRUE	reported	Urokinase-type plasminogen activator levels	90274847	2	TRUE	NA	NA	0.002929	11781	2.27798e-05	138086	TRUE	2.65735e-07
8	rs2227575	A	C	A	C	-0.0946	0.0199	0.5624	0.5945	FALSE	FALSE	FALSE	ebi-a-GCST90027164	10	75677840	0.0113	138086	0.0789696	Amyotrophic lateral sclerosis || id:ebi-a-GCST90027164	Amyotrophic lateral sclerosis	Amyotrophic lateral sclerosis || ||	TRUE	igd	NA	NA	NA	NA	NA	NA	NA	200	0.0115	1.93e-16	14729	90274847	TRUE	reported	Urokinase-type plasminogen activator levels	90274847	2	TRUE	NA	NA	0.00457384	14729	2.24593e-05	138086	TRUE	3.68239e-13
[truncated: 394 more rows]
[truncated: 1 more columns]

## Sheet: S9
Details of Forward Mendelian randomization snp
Select snp p_value < 5e-7
[truncated: 589 more rows]
[truncated: 1 more columns]

[truncated: 2 more sheets: S10, S11]
