# Supplementary material for: Two-sample Mendelian randomization analysis of 91 circulating inflammatory protein levels and amyotrophic lateral sclerosis
Source: Front Aging Neurosci. 2024 Mar 27;16:1367106. doi: 10.3389/fnagi.2024.1367106 (PMC11004327; doi:10.3389/fnagi.2024.1367106)
Supplement: Supplementary file 2 [file Table_2.XLS]

## Sheet: content
content	Supplementary table
Source of validation group data	S1
Results of validation group Mendelian Randomization Analysis between 91 inflammatory proteins and ALS (snp p < 5e-8)	S2
Results of validation group Mendelian Randomization Analysis between 91 inflammatory proteins and ALS (snp p < 5e-7)	S3
Results of validation group Mendelian Randomization Analysis between 91 inflammatory proteins and ALS (snp p < 5e-6)	S4
Results of validation group Mendelian Randomization Analysis between ALS and 91 inflammatory proteins(snp p < 5e-8)	S5
SNP details for the forward Mendelian randomization validation group (p<5e-8)	S6
SNP details for the forward Mendelian randomization validation group (p<5e-7)	S7
SNP details for the forward Mendelian randomization validation group (p<5e-6)	S8
SNP details for the reverse Mendelian randomization validation group	S9

## Sheet: S1
Source of validation group data
TRIT	PMID/Source	Year	Samplesize	Ancestry
Amyotrophic lateral sclerosis(sporadic)	27455348	2016	36052	EUR
Amyotrophic lateral sclerosis(mixed)	29566793	2018	80610	EUR

## Sheet: S2
Results of validation group Mendelian Randomization Analysis between 91 inflammatory proteins and ALS (snp p < 5e-8)
	id.exposure	id.outcome	outcome	exposure	method	nsnp	b	se	pval	lo_ci	up_ci	or	or_lci95	or_uci95	Q	Q_df	Q_pval	egger_intercept	pval(egger_intercept)
1	Adenosine Deaminase levels	ebi-a-GCST004692	Amyotrophic lateral sclerosis || id:ebi-a-GCST004692	90274759	MR Egger	4	0.0677961	0.12401	0.639431	-0.175264	0.310857	1.07015	0.839235	1.36459	9.74168	2	0.00766692	-0.0271212	0.700908
2	Adenosine Deaminase levels	ebi-a-GCST004692	Amyotrophic lateral sclerosis || id:ebi-a-GCST004692	90274759	Weighted median	4	0.0391582	0.0406252	0.335102	-0.0404673	0.118784	1.03994	0.960341	1.12613	9.74168	2	0.00766692	-0.0271212	0.700908
3	Adenosine Deaminase levels	ebi-a-GCST004692	Amyotrophic lateral sclerosis || id:ebi-a-GCST004692	90274759	Inverse variance weighted	4	0.0259371	0.0687794	0.706096	-0.108871	0.160745	1.02628	0.896846	1.17439	9.74168	2	0.00766692	-0.0271212	0.700908
4	Adenosine Deaminase levels	ebi-a-GCST004692	Amyotrophic lateral sclerosis || id:ebi-a-GCST004692	90274759	Simple mode	4	-0.0222815	0.0812887	0.801795	-0.181607	0.137044	0.977965	0.833929	1.14688	9.74168	2	0.00766692	-0.0271212	0.700908
5	Adenosine Deaminase levels	ebi-a-GCST004692	Amyotrophic lateral sclerosis || id:ebi-a-GCST004692	90274759	Weighted mode	4	0.0725569	0.0411061	0.175729	-0.00801111	0.153125	1.07525	0.992021	1.16547	9.74168	2	0.00766692	-0.0271212	0.700908
6	TNF-beta levels	ebi-a-GCST004692	Amyotrophic lateral sclerosis || id:ebi-a-GCST004692	90274840	MR Egger	11	0.025287	0.0921644	0.789995	-0.155355	0.205929	1.02561	0.856111	1.22867	19.031	9	0.0249306	-0.0155329	0.616688
7	TNF-beta levels	ebi-a-GCST004692	Amyotrophic lateral sclerosis || id:ebi-a-GCST004692	90274840	Weighted median	11	-0.00253111	0.0377341	0.94652	-0.0764899	0.0714277	0.997472	0.926362	1.07404	19.031	9	0.0249306	-0.0155329	0.616688
8	TNF-beta levels	ebi-a-GCST004692	Amyotrophic lateral sclerosis || id:ebi-a-GCST004692	90274840	Inverse variance weighted	11	-0.01602	0.0445877	0.719378	-0.103412	0.0713719	0.984108	0.901756	1.07398	19.031	9	0.0249306	-0.0155329	0.616688
9	TNF-beta levels	ebi-a-GCST004692	Amyotrophic lateral sclerosis || id:ebi-a-GCST004692	90274840	Simple mode	11	-0.190586	0.1033	0.0948218	-0.393054	0.0118814	0.826474	0.674992	1.01195	19.031	9	0.0249306	-0.0155329	0.616688
10	TNF-beta levels	ebi-a-GCST004692	Amyotrophic lateral sclerosis || id:ebi-a-GCST004692	90274840	Weighted mode	11	-0.00330383	0.0439187	0.941519	-0.0893844	0.0827768	0.996702	0.914494	1.0863	19.031	9	0.0249306	-0.0155329	0.616688
11	Oncostatin-M levels	ebi-a-GCST004692	Amyotrophic lateral sclerosis || id:ebi-a-GCST004692	90274831	MR Egger	4	0.517708	0.452128	0.370732	-0.368461	1.40388	1.67818	0.691798	4.07096	2.87859	2	0.237095	-0.0712894	0.272018
12	Oncostatin-M levels	ebi-a-GCST004692	Amyotrophic lateral sclerosis || id:ebi-a-GCST004692	90274831	Weighted median	4	-0.0737384	0.129182	0.568129	-0.326936	0.179459	0.928915	0.72113	1.19657	2.87859	2	0.237095	-0.0712894	0.272018
13	Oncostatin-M levels	ebi-a-GCST004692	Amyotrophic lateral sclerosis || id:ebi-a-GCST004692	90274831	Inverse variance weighted	4	-0.135025	0.148142	0.362055	-0.425385	0.155334	0.873694	0.653518	1.16805	2.87859	2	0.237095	-0.0712894	0.272018
14	Oncostatin-M levels	ebi-a-GCST004692	Amyotrophic lateral sclerosis || id:ebi-a-GCST004692	90274831	Simple mode	4	-0.0222718	0.180081	0.909392	-0.37523	0.330686	0.977974	0.687131	1.39192	2.87859	2	0.237095	-0.0712894	0.272018
15	Oncostatin-M levels	ebi-a-GCST004692	Amyotrophic lateral sclerosis || id:ebi-a-GCST004692	90274831	Weighted mode	4	-0.0592532	0.147916	0.715547	-0.349169	0.230662	0.942468	0.705274	1.25943	2.87859	2	0.237095	-0.0712894	0.272018
16	Osteoprotegerin levels	ebi-a-GCST004692	Amyotrophic lateral sclerosis || id:ebi-a-GCST004692	90274830	MR Egger	5	-0.10848	0.213812	0.646846	-0.527551	0.31059	0.897196	0.590048	1.36423	2.8271	3	0.419058	-0.0128646	0.69957
17	Osteoprotegerin levels	ebi-a-GCST004692	Amyotrophic lateral sclerosis || id:ebi-a-GCST004692	90274830	Weighted median	5	-0.16529	0.0825828	0.0453374	-0.327153	-0.00342805	0.847648	0.720974	0.996578	2.8271	3	0.419058	-0.0128646	0.69957
18	Osteoprotegerin levels	ebi-a-GCST004692	Amyotrophic lateral sclerosis || id:ebi-a-GCST004692	90274830	Inverse variance weighted	5	-0.19391	0.0726877	0.00763705	-0.336378	-0.0514417	0.823732	0.714353	0.949859	2.8271	3	0.419058	-0.0128646	0.69957
19	Osteoprotegerin levels	ebi-a-GCST004692	Amyotrophic lateral sclerosis || id:ebi-a-GCST004692	90274830	Simple mode	5	-0.23555	0.127712	0.13889	-0.485865	0.0147652	0.790136	0.615165	1.01487	2.8271	3	0.419058	-0.0128646	0.69957
20	Osteoprotegerin levels	ebi-a-GCST004692	Amyotrophic lateral sclerosis || id:ebi-a-GCST004692	90274830	Weighted mode	5	-0.154276	0.0834205	0.138089	-0.317781	0.00922804	0.857035	0.727763	1.00927	2.8271	3	0.419058	-0.0128646	0.69957
21	Leukemia inhibitory factor receptor levels	ebi-a-GCST004692	Amyotrophic lateral sclerosis || id:ebi-a-GCST004692	90274820	Wald ratio	1	0.0418782	0.227157	0.853733	-0.40335	0.487107	1.04277	0.668078	1.6276	#N/A	#N/A	#N/A	#N/A	#N/A
22	Interleukin-17C levels	ebi-a-GCST004692	Amyotrophic lateral sclerosis || id:ebi-a-GCST004692	90274802	Wald ratio	1	0.202857	0.178095	0.254688	-0.14621	0.551924	1.2249	0.863977	1.73659	#N/A	#N/A	#N/A	#N/A	#N/A
23	Tumor necrosis factor ligand superfamily member 12 levels	ebi-a-GCST004692	Amyotrophic lateral sclerosis || id:ebi-a-GCST004692	90274846	MR Egger	5	0.33742	0.157524	0.12162	0.0286734	0.646167	1.40133	1.02909	1.90821	2.08426	3	0.555103	-0.0310555	0.305931
24	Tumor necrosis factor ligand superfamily member 12 levels	ebi-a-GCST004692	Amyotrophic lateral sclerosis || id:ebi-a-GCST004692	90274846	Weighted median	5	0.201106	0.0779645	0.0098956	0.0482956	0.353916	1.22275	1.04948	1.42464	2.08426	3	0.555103	-0.0310555	0.305931
25	Tumor necrosis factor ligand superfamily member 12 levels	ebi-a-GCST004692	Amyotrophic lateral sclerosis || id:ebi-a-GCST004692	90274846	Inverse variance weighted	5	0.162853	0.0686581	0.017695	0.0282829	0.297422	1.17686	1.02869	1.34638	2.08426	3	0.555103	-0.0310555	0.305931
26	Tumor necrosis factor ligand superfamily member 12 levels	ebi-a-GCST004692	Amyotrophic lateral sclerosis || id:ebi-a-GCST004692	90274846	Simple mode	5	0.174075	0.121209	0.224303	-0.0634936	0.411644	1.19014	0.93848	1.5093	2.08426	3	0.555103	-0.0310555	0.305931
27	Tumor necrosis factor ligand superfamily member 12 levels	ebi-a-GCST004692	Amyotrophic lateral sclerosis || id:ebi-a-GCST004692	90274846	Weighted mode	5	0.221418	0.086481	0.0626174	0.0519156	0.390921	1.24785	1.05329	1.47834	2.08426	3	0.555103	-0.0310555	0.305931
28	C-C motif chemokine 20 levels	ebi-a-GCST004692	Amyotrophic lateral sclerosis || id:ebi-a-GCST004692	90274766	Inverse variance weighted	2	-0.110453	0.323447	0.732737	-0.74441	0.523504	0.895428	0.475015	1.68793	#N/A	#N/A	#N/A	NA	NA
29	Interleukin-10 levels	ebi-a-GCST004692	Amyotrophic lateral sclerosis || id:ebi-a-GCST004692	90274795	MR Egger	4	0.390607	0.511559	0.524906	-0.612049	1.39326	1.47788	0.542239	4.02797	0.714965	2	0.699435	-0.0541518	0.516384
30	Interleukin-10 levels	ebi-a-GCST004692	Amyotrophic lateral sclerosis || id:ebi-a-GCST004692	90274795	Weighted median	4	0.0571662	0.112214	0.610446	-0.162774	0.277106	1.05883	0.849783	1.31931	0.714965	2	0.699435	-0.0541518	0.516384
31	Interleukin-10 levels	ebi-a-GCST004692	Amyotrophic lateral sclerosis || id:ebi-a-GCST004692	90274795	Inverse variance weighted	4	-0.00170492	0.0980823	0.986131	-0.193946	0.190536	0.998297	0.823702	1.2099	0.714965	2	0.699435	-0.0541518	0.516384
32	Interleukin-10 levels	ebi-a-GCST004692	Amyotrophic lateral sclerosis || id:ebi-a-GCST004692	90274795	Simple mode	4	0.055405	0.170488	0.766542	-0.278752	0.389562	1.05697	0.756727	1.47633	0.714965	2	0.699435	-0.0541518	0.516384
33	Interleukin-10 levels	ebi-a-GCST004692	Amyotrophic lateral sclerosis || id:ebi-a-GCST004692	90274795	Weighted mode	4	0.0650609	0.129987	0.651124	-0.189714	0.319836	1.06722	0.827195	1.3769	0.714965	2	0.699435	-0.0541518	0.516384
34	Adenosine Deaminase levels	ebi-a-GCST005647	Amyotrophic lateral sclerosis || id:ebi-a-GCST005647	90274759	MR Egger	6	0.0112696	0.0698369	0.879624	-0.125611	0.14815	1.01133	0.881958	1.15969	10.1941	4	0.0372824	0.0216999	0.51734
35	Adenosine Deaminase levels	ebi-a-GCST005647	Amyotrophic lateral sclerosis || id:ebi-a-GCST005647	90274759	Weighted median	6	0.0740131	0.0344933	0.0318953	0.00640612	0.14162	1.07682	1.00643	1.15214	10.1941	4	0.0372824	0.0216999	0.51734
36	Adenosine Deaminase levels	ebi-a-GCST005647	Amyotrophic lateral sclerosis || id:ebi-a-GCST005647	90274759	Inverse variance weighted	6	0.0479576	0.0445239	0.281426	-0.0393092	0.135224	1.04913	0.961453	1.14479	10.1941	4	0.0372824	0.0216999	0.51734
37	Adenosine Deaminase levels	ebi-a-GCST005647	Amyotrophic lateral sclerosis || id:ebi-a-GCST005647	90274759	Simple mode	6	0.0725527	0.0675506	0.331877	-0.0598465	0.204952	1.07525	0.941909	1.22747	10.1941	4	0.0372824	0.0216999	0.51734
38	Adenosine Deaminase levels	ebi-a-GCST005647	Amyotrophic lateral sclerosis || id:ebi-a-GCST005647	90274759	Weighted mode	6	0.0509816	0.0347244	0.201986	-0.0170782	0.119041	1.0523	0.983067	1.12642	10.1941	4	0.0372824	0.0216999	0.51734
39	TNF-beta levels	ebi-a-GCST005647	Amyotrophic lateral sclerosis || id:ebi-a-GCST005647	90274840	MR Egger	12	-0.0722495	0.0493708	0.174067	-0.169016	0.0245173	0.930299	0.844495	1.02482	13.6013	10	0.191966	0.0132958	0.376859
40	TNF-beta levels	ebi-a-GCST005647	Amyotrophic lateral sclerosis || id:ebi-a-GCST005647	90274840	Weighted median	12	-0.0328606	0.030276	0.27776	-0.0922016	0.0264805	0.967673	0.911921	1.02683	13.6013	10	0.191966	0.0132958	0.376859
41	TNF-beta levels	ebi-a-GCST005647	Amyotrophic lateral sclerosis || id:ebi-a-GCST005647	90274840	Inverse variance weighted	12	-0.0349572	0.0282955	0.216668	-0.0904163	0.0205019	0.965647	0.913551	1.02071	13.6013	10	0.191966	0.0132958	0.376859
42	TNF-beta levels	ebi-a-GCST005647	Amyotrophic lateral sclerosis || id:ebi-a-GCST005647	90274840	Simple mode	12	-0.116958	0.0673147	0.11018	-0.248895	0.0149788	0.889622	0.779662	1.01509	13.6013	10	0.191966	0.0132958	0.376859
43	TNF-beta levels	ebi-a-GCST005647	Amyotrophic lateral sclerosis || id:ebi-a-GCST005647	90274840	Weighted mode	12	-0.0349332	0.0359055	0.351501	-0.105308	0.0354415	0.96567	0.900047	1.03608	13.6013	10	0.191966	0.0132958	0.376859
44	Oncostatin-M levels	ebi-a-GCST005647	Amyotrophic lateral sclerosis || id:ebi-a-GCST005647	90274831	MR Egger	5	0.51704	0.39973	0.286437	-0.26643	1.30051	1.67706	0.76611	3.67117	5.81044	3	0.121206	-0.0685819	0.202552
45	Oncostatin-M levels	ebi-a-GCST005647	Amyotrophic lateral sclerosis || id:ebi-a-GCST005647	90274831	Weighted median	5	-0.04295	0.0966964	0.656917	-0.232475	0.146575	0.957959	0.79257	1.15786	5.81044	3	0.121206	-0.0685819	0.202552
46	Oncostatin-M levels	ebi-a-GCST005647	Amyotrophic lateral sclerosis || id:ebi-a-GCST005647	90274831	Inverse variance weighted	5	-0.109257	0.1263	0.387005	-0.356805	0.138291	0.8965	0.699909	1.14831	5.81044	3	0.121206	-0.0685819	0.202552
47	Oncostatin-M levels	ebi-a-GCST005647	Amyotrophic lateral sclerosis || id:ebi-a-GCST005647	90274831	Simple mode	5	0.0394556	0.120253	0.759289	-0.196241	0.275152	1.04024	0.821814	1.31673	5.81044	3	0.121206	-0.0685819	0.202552
48	Oncostatin-M levels	ebi-a-GCST005647	Amyotrophic lateral sclerosis || id:ebi-a-GCST005647	90274831	Weighted mode	5	-0.0135387	0.103369	0.902119	-0.216141	0.189064	0.986553	0.805621	1.20812	5.81044	3	0.121206	-0.0685819	0.202552
49	Osteoprotegerin levels	ebi-a-GCST005647	Amyotrophic lateral sclerosis || id:ebi-a-GCST005647	90274830	MR Egger	6	0.0982066	0.225569	0.685754	-0.343908	0.540321	1.10319	0.708994	1.71656	7.63555	4	0.105879	-0.0300692	0.401825
50	Osteoprotegerin levels	ebi-a-GCST005647	Amyotrophic lateral sclerosis || id:ebi-a-GCST005647	90274830	Weighted median	6	-0.0876207	0.066636	0.188538	-0.218227	0.0429858	0.916108	0.803943	1.04392	7.63555	4	0.105879	-0.0300692	0.401825
51	Osteoprotegerin levels	ebi-a-GCST005647	Amyotrophic lateral sclerosis || id:ebi-a-GCST005647	90274830	Inverse variance weighted	6	-0.100445	0.0760613	0.186642	-0.249525	0.0486353	0.904435	0.779171	1.04984	7.63555	4	0.105879	-0.0300692	0.401825
52	Osteoprotegerin levels	ebi-a-GCST005647	Amyotrophic lateral sclerosis || id:ebi-a-GCST005647	90274830	Simple mode	6	-0.154544	0.123331	0.265582	-0.396274	0.0871846	0.856805	0.672823	1.0911	7.63555	4	0.105879	-0.0300692	0.401825
53	Osteoprotegerin levels	ebi-a-GCST005647	Amyotrophic lateral sclerosis || id:ebi-a-GCST005647	90274830	Weighted mode	6	-0.0786418	0.0687078	0.304199	-0.213309	0.0560255	0.924371	0.807906	1.05762	7.63555	4	0.105879	-0.0300692	0.401825
54	Leukemia inhibitory factor receptor levels	ebi-a-GCST005647	Amyotrophic lateral sclerosis || id:ebi-a-GCST005647	90274820	Inverse variance weighted	2	-0.212626	0.13432	0.113426	-0.475893	0.0506414	0.808459	0.62133	1.05195	#N/A	#N/A	#N/A	NA	NA
55	Interleukin-17C levels	ebi-a-GCST005647	Amyotrophic lateral sclerosis || id:ebi-a-GCST005647	90274802	Inverse variance weighted	2	0.174604	0.11094	0.11552	-0.0428386	0.392047	1.19077	0.958066	1.48001	#N/A	#N/A	#N/A	NA	NA
56	Tumor necrosis factor ligand superfamily member 12 levels	ebi-a-GCST005647	Amyotrophic lateral sclerosis || id:ebi-a-GCST005647	90274846	MR Egger	6	0.274305	0.123666	0.090802	0.0319204	0.51669	1.31562	1.03244	1.67647	4.2042	4	0.379075	-0.0344267	0.141011
57	Tumor necrosis factor ligand superfamily member 12 levels	ebi-a-GCST005647	Amyotrophic lateral sclerosis || id:ebi-a-GCST005647	90274846	Weighted median	6	0.0954059	0.0606778	0.115872	-0.0235225	0.214334	1.10011	0.976752	1.23904	4.2042	4	0.379075	-0.0344267	0.141011
58	Tumor necrosis factor ligand superfamily member 12 levels	ebi-a-GCST005647	Amyotrophic lateral sclerosis || id:ebi-a-GCST005647	90274846	Inverse variance weighted	6	0.0675223	0.0611623	0.269599	-0.0523558	0.1874	1.06985	0.948991	1.20611	4.2042	4	0.379075	-0.0344267	0.141011
59	Tumor necrosis factor ligand superfamily member 12 levels	ebi-a-GCST005647	Amyotrophic lateral sclerosis || id:ebi-a-GCST005647	90274846	Simple mode	6	-0.0508469	0.13155	0.715012	-0.308685	0.206991	0.950424	0.734412	1.22997	4.2042	4	0.379075	-0.0344267	0.141011
60	Tumor necrosis factor ligand superfamily member 12 levels	ebi-a-GCST005647	Amyotrophic lateral sclerosis || id:ebi-a-GCST005647	90274846	Weighted mode	6	0.140961	0.0660715	0.0860257	0.0114612	0.270461	1.15138	1.01153	1.31057	4.2042	4	0.379075	-0.0344267	0.141011
61	C-C motif chemokine 20 levels	ebi-a-GCST005647	Amyotrophic lateral sclerosis || id:ebi-a-GCST005647	90274766	Inverse variance weighted	2	-0.192529	0.17548	0.272572	-0.53647	0.151411	0.82487	0.584809	1.16348	#N/A	#N/A	#N/A	NA	NA
62	Interleukin-10 levels	ebi-a-GCST005647	Amyotrophic lateral sclerosis || id:ebi-a-GCST005647	90274795	MR Egger	4	0.630551	0.398355	0.254278	-0.150225	1.41133	1.87865	0.860514	4.1014	0.445561	2	0.80029	-0.0809868	0.272616
63	Interleukin-10 levels	ebi-a-GCST005647	Amyotrophic lateral sclerosis || id:ebi-a-GCST005647	90274795	Weighted median	4	0.089481	0.0924622	0.333165	-0.0917448	0.270707	1.09361	0.912338	1.31089	0.445561	2	0.80029	-0.0809868	0.272616
64	Interleukin-10 levels	ebi-a-GCST005647	Amyotrophic lateral sclerosis || id:ebi-a-GCST005647	90274795	Inverse variance weighted	4	0.0447803	0.0773769	0.562772	-0.106878	0.196439	1.0458	0.898635	1.21706	0.445561	2	0.80029	-0.0809868	0.272616
65	Interleukin-10 levels	ebi-a-GCST005647	Amyotrophic lateral sclerosis || id:ebi-a-GCST005647	90274795	Simple mode	4	-0.109554	0.143742	0.501408	-0.391288	0.172179	0.896234	0.676186	1.18789	0.445561	2	0.80029	-0.0809868	0.272616
66	Interleukin-10 levels	ebi-a-GCST005647	Amyotrophic lateral sclerosis || id:ebi-a-GCST005647	90274795	Weighted mode	4	0.121967	0.108525	0.342885	-0.090741	0.334675	1.12972	0.913254	1.39749	0.445561	2	0.80029	-0.0809868	0.272616

## Sheet: S3
Results of validation group Mendelian Randomization Analysis between 91 inflammatory proteins and ALS (snp p < 5e-7)
	id.exposure	id.outcome	outcome	exposure	method	nsnp	b	se	pval	lo_ci	up_ci	or	or_lci95	or_uci95	Q	Q_df	Q_pval	egger_intercept	pval(egger_intercept)
1	C-C motif chemokine 20 levels	ebi-a-GCST004692	Amyotrophic lateral sclerosis || id:ebi-a-GCST004692	90274766	MR Egger	3	-0.0206881	1.56612	0.991591	-3.09029	3.04891	0.979524	0.0454888	21.0924	9.71246	1	0.00183022	0.00248268	0.990328
2	C-C motif chemokine 20 levels	ebi-a-GCST004692	Amyotrophic lateral sclerosis || id:ebi-a-GCST004692	90274766	Weighted median	3	0.0336758	0.169801	0.842791	-0.299135	0.366486	1.03425	0.741459	1.44266	9.71246	1	0.00183022	0.00248268	0.990328
3	C-C motif chemokine 20 levels	ebi-a-GCST004692	Amyotrophic lateral sclerosis || id:ebi-a-GCST004692	90274766	Inverse variance weighted	3	0.00240143	0.2677	0.992843	-0.522291	0.527093	1.0024	0.59316	1.694	9.71246	1	0.00183022	0.00248268	0.990328
4	C-C motif chemokine 20 levels	ebi-a-GCST004692	Amyotrophic lateral sclerosis || id:ebi-a-GCST004692	90274766	Simple mode	3	0.329453	0.234117	0.294649	-0.129416	0.788323	1.39021	0.878608	2.1997	9.71246	1	0.00183022	0.00248268	0.990328
5	C-C motif chemokine 20 levels	ebi-a-GCST004692	Amyotrophic lateral sclerosis || id:ebi-a-GCST004692	90274766	Weighted mode	3	0.20568	0.28347	0.543513	-0.349921	0.761281	1.22836	0.704744	2.14102	9.71246	1	0.00183022	0.00248268	0.990328
6	Interleukin-10 levels	ebi-a-GCST004692	Amyotrophic lateral sclerosis || id:ebi-a-GCST004692	90274795	MR Egger	6	0.2376	0.333684	0.515762	-0.416421	0.891621	1.2682	0.659402	2.43908	0.875528	4	0.928045	-0.0324109	0.474476
7	Interleukin-10 levels	ebi-a-GCST004692	Amyotrophic lateral sclerosis || id:ebi-a-GCST004692	90274795	Weighted median	6	0.0195683	0.106653	0.854424	-0.189471	0.228607	1.01976	0.827397	1.25685	0.875528	4	0.928045	-0.0324109	0.474476
8	Interleukin-10 levels	ebi-a-GCST004692	Amyotrophic lateral sclerosis || id:ebi-a-GCST004692	90274795	Inverse variance weighted	6	-0.0156297	0.0906717	0.863141	-0.193346	0.162087	0.984492	0.824196	1.17596	0.875528	4	0.928045	-0.0324109	0.474476
9	Interleukin-10 levels	ebi-a-GCST004692	Amyotrophic lateral sclerosis || id:ebi-a-GCST004692	90274795	Simple mode	6	-0.082663	0.15724	0.621561	-0.390853	0.225527	0.920661	0.67648	1.25298	0.875528	4	0.928045	-0.0324109	0.474476
10	Interleukin-10 levels	ebi-a-GCST004692	Amyotrophic lateral sclerosis || id:ebi-a-GCST004692	90274795	Weighted mode	6	0.0634446	0.129566	0.645095	-0.190506	0.317395	1.0655	0.826541	1.37354	0.875528	4	0.928045	-0.0324109	0.474476
11	Interleukin-5 levels	ebi-a-GCST004692	Amyotrophic lateral sclerosis || id:ebi-a-GCST004692	90274814	Inverse variance weighted	2	0.0680002	0.43906	0.876919	-0.792558	0.928559	1.07037	0.452685	2.53086	#N/A	#N/A	#N/A	NA	NA
12	Interleukin-17C levels	ebi-a-GCST004692	Amyotrophic lateral sclerosis || id:ebi-a-GCST004692	90274802	MR Egger	3	0.0445467	0.301287	0.90655	-0.545975	0.635069	1.04555	0.579277	1.88715	0.417588	1	0.518143	0.015912	0.773721
13	Interleukin-17C levels	ebi-a-GCST004692	Amyotrophic lateral sclerosis || id:ebi-a-GCST004692	90274802	Weighted median	3	0.202114	0.134648	0.133341	-0.0617958	0.466024	1.22399	0.940075	1.59364	0.417588	1	0.518143	0.015912	0.773721
14	Interleukin-17C levels	ebi-a-GCST004692	Amyotrophic lateral sclerosis || id:ebi-a-GCST004692	90274802	Inverse variance weighted	3	0.147217	0.119472	0.217864	-0.0869482	0.381381	1.1586	0.916725	1.46431	0.417588	1	0.518143	0.015912	0.773721
15	Interleukin-17C levels	ebi-a-GCST004692	Amyotrophic lateral sclerosis || id:ebi-a-GCST004692	90274802	Simple mode	3	0.202345	0.172991	0.362659	-0.136718	0.541408	1.22427	0.872216	1.71842	0.417588	1	0.518143	0.015912	0.773721
16	Interleukin-17C levels	ebi-a-GCST004692	Amyotrophic lateral sclerosis || id:ebi-a-GCST004692	90274802	Weighted mode	3	0.202345	0.170218	0.356554	-0.131282	0.535972	1.22427	0.87697	1.70911	0.417588	1	0.518143	0.015912	0.773721
17	Tumor necrosis factor ligand superfamily member 12 levels	ebi-a-GCST004692	Amyotrophic lateral sclerosis || id:ebi-a-GCST004692	90274846	MR Egger	9	0.410642	0.133891	0.0181439	0.148217	0.673068	1.50779	1.15976	1.96024	6.45026	7	0.488265	-0.0430248	0.0632847
18	Tumor necrosis factor ligand superfamily member 12 levels	ebi-a-GCST004692	Amyotrophic lateral sclerosis || id:ebi-a-GCST004692	90274846	Weighted median	9	0.209339	0.081312	0.0100379	0.049968	0.368711	1.23286	1.05124	1.44587	6.45026	7	0.488265	-0.0430248	0.0632847
19	Tumor necrosis factor ligand superfamily member 12 levels	ebi-a-GCST004692	Amyotrophic lateral sclerosis || id:ebi-a-GCST004692	90274846	Inverse variance weighted	9	0.149579	0.0743146	0.0441384	0.00392186	0.295235	1.16134	1.00393	1.34344	6.45026	7	0.488265	-0.0430248	0.0632847
20	Tumor necrosis factor ligand superfamily member 12 levels	ebi-a-GCST004692	Amyotrophic lateral sclerosis || id:ebi-a-GCST004692	90274846	Simple mode	9	0.135465	0.1523	0.399709	-0.163042	0.433973	1.14507	0.849555	1.54338	6.45026	7	0.488265	-0.0430248	0.0632847
21	Tumor necrosis factor ligand superfamily member 12 levels	ebi-a-GCST004692	Amyotrophic lateral sclerosis || id:ebi-a-GCST004692	90274846	Weighted mode	9	0.207552	0.0839142	0.0385065	0.0430805	0.372024	1.23066	1.04402	1.45067	6.45026	7	0.488265	-0.0430248	0.0632847
22	TNF-beta levels	ebi-a-GCST004692	Amyotrophic lateral sclerosis || id:ebi-a-GCST004692	90274840	MR Egger	14	0.0176018	0.0833985	0.836384	-0.145859	0.181063	1.01776	0.864279	1.19849	22.3623	12	0.0336539	-0.0145766	0.580977
23	TNF-beta levels	ebi-a-GCST004692	Amyotrophic lateral sclerosis || id:ebi-a-GCST004692	90274840	Weighted median	14	-0.00254331	0.0412541	0.950842	-0.0834013	0.0783147	0.99746	0.919982	1.08146	22.3623	12	0.0336539	-0.0145766	0.580977
24	TNF-beta levels	ebi-a-GCST004692	Amyotrophic lateral sclerosis || id:ebi-a-GCST004692	90274840	Inverse variance weighted	14	-0.023144	0.0412632	0.574876	-0.10402	0.057732	0.977122	0.901207	1.05943	22.3623	12	0.0336539	-0.0145766	0.580977
25	TNF-beta levels	ebi-a-GCST004692	Amyotrophic lateral sclerosis || id:ebi-a-GCST004692	90274840	Simple mode	14	-0.212127	0.111485	0.0794562	-0.430638	0.00638347	0.808862	0.650094	1.0064	22.3623	12	0.0336539	-0.0145766	0.580977
26	TNF-beta levels	ebi-a-GCST004692	Amyotrophic lateral sclerosis || id:ebi-a-GCST004692	90274840	Weighted mode	14	-0.000716398	0.0466687	0.987985	-0.0921871	0.0907543	0.999284	0.911934	1.095	22.3623	12	0.0336539	-0.0145766	0.580977
27	SIR2-like protein 2 levels	ebi-a-GCST004692	Amyotrophic lateral sclerosis || id:ebi-a-GCST004692	90274834	Wald ratio	1	0.0973684	0.285526	0.733093	-0.462263	0.657	1.10227	0.629857	1.929	#N/A	#N/A	#N/A	#N/A	#N/A
28	Neurturin levels	ebi-a-GCST004692	Amyotrophic lateral sclerosis || id:ebi-a-GCST004692	90274828	Wald ratio	1	0.0811502	0.227476	0.721285	-0.364703	0.527003	1.08453	0.694403	1.69385	#N/A	#N/A	#N/A	#N/A	#N/A
29	Oncostatin-M levels	ebi-a-GCST004692	Amyotrophic lateral sclerosis || id:ebi-a-GCST004692	90274831	MR Egger	6	0.261472	0.390604	0.539894	-0.504112	1.02706	1.29884	0.604042	2.79283	6.64886	4	0.155649	-0.0347704	0.415502
30	Oncostatin-M levels	ebi-a-GCST004692	Amyotrophic lateral sclerosis || id:ebi-a-GCST004692	90274831	Weighted median	6	-0.0485874	0.124886	0.697235	-0.293364	0.196189	0.952574	0.745751	1.21676	6.64886	4	0.155649	-0.0347704	0.415502
31	Oncostatin-M levels	ebi-a-GCST004692	Amyotrophic lateral sclerosis || id:ebi-a-GCST004692	90274831	Inverse variance weighted	6	-0.075883	0.117698	0.519106	-0.306572	0.154806	0.926925	0.735966	1.16743	6.64886	4	0.155649	-0.0347704	0.415502
32	Oncostatin-M levels	ebi-a-GCST004692	Amyotrophic lateral sclerosis || id:ebi-a-GCST004692	90274831	Simple mode	6	0.0696544	0.169406	0.697979	-0.262381	0.40169	1.07214	0.769218	1.49435	6.64886	4	0.155649	-0.0347704	0.415502
33	Oncostatin-M levels	ebi-a-GCST004692	Amyotrophic lateral sclerosis || id:ebi-a-GCST004692	90274831	Weighted mode	6	-0.0365024	0.126735	0.784888	-0.284904	0.211899	0.964156	0.752087	1.23602	6.64886	4	0.155649	-0.0347704	0.415502
34	Leukemia inhibitory factor receptor levels	ebi-a-GCST004692	Amyotrophic lateral sclerosis || id:ebi-a-GCST004692	90274820	Inverse variance weighted	2	0.167876	0.17259	0.33071	-0.170401	0.506153	1.18279	0.843327	1.6589	#N/A	#N/A	#N/A	NA	NA
35	Osteoprotegerin levels	ebi-a-GCST004692	Amyotrophic lateral sclerosis || id:ebi-a-GCST004692	90274830	MR Egger	9	-0.107538	0.153177	0.505315	-0.407765	0.192689	0.898043	0.665135	1.21251	5.2122	7	0.634085	-0.0123	0.51152
36	Osteoprotegerin levels	ebi-a-GCST004692	Amyotrophic lateral sclerosis || id:ebi-a-GCST004692	90274830	Weighted median	9	-0.176057	0.0862361	0.0411939	-0.34508	-0.00703455	0.83857	0.708164	0.99299	5.2122	7	0.634085	-0.0123	0.51152
37	Osteoprotegerin levels	ebi-a-GCST004692	Amyotrophic lateral sclerosis || id:ebi-a-GCST004692	90274830	Inverse variance weighted	9	-0.203368	0.0652583	0.00183104	-0.331274	-0.0754616	0.815978	0.718008	0.927315	5.2122	7	0.634085	-0.0123	0.51152
38	Osteoprotegerin levels	ebi-a-GCST004692	Amyotrophic lateral sclerosis || id:ebi-a-GCST004692	90274830	Simple mode	9	-0.280015	0.129783	0.0630275	-0.53439	-0.0256412	0.755772	0.586027	0.974685	5.2122	7	0.634085	-0.0123	0.51152
39	Osteoprotegerin levels	ebi-a-GCST004692	Amyotrophic lateral sclerosis || id:ebi-a-GCST004692	90274830	Weighted mode	9	-0.161376	0.0845637	0.0927679	-0.327121	0.00436837	0.850972	0.720996	1.00438	5.2122	7	0.634085	-0.0123	0.51152
40	Adenosine Deaminase levels	ebi-a-GCST004692	Amyotrophic lateral sclerosis || id:ebi-a-GCST004692	90274759	MR Egger	6	0.0364978	0.0795053	0.670028	-0.119333	0.192328	1.03717	0.887513	1.21207	10.9657	4	0.0269526	-0.00389076	0.901386
41	Adenosine Deaminase levels	ebi-a-GCST004692	Amyotrophic lateral sclerosis || id:ebi-a-GCST004692	90274759	Weighted median	6	0.0442323	0.0433378	0.307425	-0.0407099	0.129174	1.04523	0.960108	1.13789	10.9657	4	0.0269526	-0.00389076	0.901386
42	Adenosine Deaminase levels	ebi-a-GCST004692	Amyotrophic lateral sclerosis || id:ebi-a-GCST004692	90274759	Inverse variance weighted	6	0.0295172	0.0532024	0.579026	-0.0747596	0.133794	1.02996	0.927967	1.14316	10.9657	4	0.0269526	-0.00389076	0.901386
43	Adenosine Deaminase levels	ebi-a-GCST004692	Amyotrophic lateral sclerosis || id:ebi-a-GCST004692	90274759	Simple mode	6	0.0898671	0.0833726	0.330313	-0.0735433	0.253277	1.09403	0.929096	1.28824	10.9657	4	0.0269526	-0.00389076	0.901386
44	Adenosine Deaminase levels	ebi-a-GCST004692	Amyotrophic lateral sclerosis || id:ebi-a-GCST004692	90274759	Weighted mode	6	0.0742175	0.0439569	0.152132	-0.011938	0.160373	1.07704	0.988133	1.17395	10.9657	4	0.0269526	-0.00389076	0.901386
45	C-C motif chemokine 20 levels	ebi-a-GCST005647	Amyotrophic lateral sclerosis || id:ebi-a-GCST005647	90274766	MR Egger	5	0.131349	0.512635	0.814344	-0.873415	1.13611	1.14037	0.417523	3.11464	9.9063	3	0.0193797	-0.0211793	0.751339
46	C-C motif chemokine 20 levels	ebi-a-GCST005647	Amyotrophic lateral sclerosis || id:ebi-a-GCST005647	90274766	Weighted median	5	-0.00986771	0.126689	0.937916	-0.258178	0.238442	0.990181	0.772458	1.26927	9.9063	3	0.0193797	-0.0211793	0.751339
47	C-C motif chemokine 20 levels	ebi-a-GCST005647	Amyotrophic lateral sclerosis || id:ebi-a-GCST005647	90274766	Inverse variance weighted	5	-0.0383229	0.136961	0.779624	-0.306766	0.23012	0.962402	0.735823	1.25875	9.9063	3	0.0193797	-0.0211793	0.751339
48	C-C motif chemokine 20 levels	ebi-a-GCST005647	Amyotrophic lateral sclerosis || id:ebi-a-GCST005647	90274766	Simple mode	5	0.144701	0.21273	0.533704	-0.272249	0.561651	1.15569	0.761664	1.75357	9.9063	3	0.0193797	-0.0211793	0.751339
49	C-C motif chemokine 20 levels	ebi-a-GCST005647	Amyotrophic lateral sclerosis || id:ebi-a-GCST005647	90274766	Weighted mode	5	0.0265482	0.163504	0.878887	-0.29392	0.347016	1.0269	0.745336	1.41484	9.9063	3	0.0193797	-0.0211793	0.751339
50	Interleukin-10 levels	ebi-a-GCST005647	Amyotrophic lateral sclerosis || id:ebi-a-GCST005647	90274795	MR Egger	6	0.260244	0.261627	0.376176	-0.252545	0.773032	1.29725	0.776822	2.16633	1.98432	4	0.738643	-0.0278133	0.435616
51	Interleukin-10 levels	ebi-a-GCST005647	Amyotrophic lateral sclerosis || id:ebi-a-GCST005647	90274795	Weighted median	6	0.0731841	0.0888493	0.410117	-0.100961	0.247329	1.07593	0.903969	1.2806	1.98432	4	0.738643	-0.0278133	0.435616
52	Interleukin-10 levels	ebi-a-GCST005647	Amyotrophic lateral sclerosis || id:ebi-a-GCST005647	90274795	Inverse variance weighted	6	0.0426038	0.0721603	0.554919	-0.0988304	0.184038	1.04352	0.905896	1.20206	1.98432	4	0.738643	-0.0278133	0.435616
53	Interleukin-10 levels	ebi-a-GCST005647	Amyotrophic lateral sclerosis || id:ebi-a-GCST005647	90274795	Simple mode	6	0.0465759	0.139923	0.752737	-0.227673	0.320824	1.04768	0.796385	1.37826	1.98432	4	0.738643	-0.0278133	0.435616
54	Interleukin-10 levels	ebi-a-GCST005647	Amyotrophic lateral sclerosis || id:ebi-a-GCST005647	90274795	Weighted mode	6	0.11611	0.109418	0.337163	-0.0983496	0.330569	1.12312	0.906332	1.39176	1.98432	4	0.738643	-0.0278133	0.435616
55	Interleukin-5 levels	ebi-a-GCST005647	Amyotrophic lateral sclerosis || id:ebi-a-GCST005647	90274814	Inverse variance weighted	2	0.187587	0.36567	0.607955	-0.529127	0.9043	1.20633	0.589119	2.4702	#N/A	#N/A	#N/A	NA	NA
56	Interleukin-17C levels	ebi-a-GCST005647	Amyotrophic lateral sclerosis || id:ebi-a-GCST005647	90274802	MR Egger	4	0.0597889	0.189816	0.7826	-0.312251	0.431829	1.06161	0.731798	1.54007	0.646869	2	0.723659	0.0108235	0.746982
57	Interleukin-17C levels	ebi-a-GCST005647	Amyotrophic lateral sclerosis || id:ebi-a-GCST005647	90274802	Weighted median	4	0.15432	0.0956286	0.106582	-0.0331117	0.341753	1.16686	0.967431	1.40741	0.646869	2	0.723659	0.0108235	0.746982
58	Interleukin-17C levels	ebi-a-GCST005647	Amyotrophic lateral sclerosis || id:ebi-a-GCST005647	90274802	Inverse variance weighted	4	0.122898	0.083157	0.139434	-0.0400898	0.285886	1.13077	0.960703	1.33094	0.646869	2	0.723659	0.0108235	0.746982
59	Interleukin-17C levels	ebi-a-GCST005647	Amyotrophic lateral sclerosis || id:ebi-a-GCST005647	90274802	Simple mode	4	0.170555	0.130464	0.282284	-0.0851553	0.426265	1.18596	0.91837	1.53153	0.646869	2	0.723659	0.0108235	0.746982
60	Interleukin-17C levels	ebi-a-GCST005647	Amyotrophic lateral sclerosis || id:ebi-a-GCST005647	90274802	Weighted mode	4	0.171817	0.121514	0.252279	-0.0663498	0.409983	1.18746	0.935803	1.50679	0.646869	2	0.723659	0.0108235	0.746982
61	Tumor necrosis factor ligand superfamily member 12 levels	ebi-a-GCST005647	Amyotrophic lateral sclerosis || id:ebi-a-GCST005647	90274846	MR Egger	12	0.241328	0.09969	0.0360134	0.0459354	0.43672	1.27294	1.04701	1.54762	9.66797	10	0.470091	-0.025135	0.0906821
62	Tumor necrosis factor ligand superfamily member 12 levels	ebi-a-GCST005647	Amyotrophic lateral sclerosis || id:ebi-a-GCST005647	90274846	Weighted median	12	0.0703289	0.0627979	0.262746	-0.0527549	0.193413	1.07286	0.948612	1.21338	9.66797	10	0.470091	-0.025135	0.0906821
63	Tumor necrosis factor ligand superfamily member 12 levels	ebi-a-GCST005647	Amyotrophic lateral sclerosis || id:ebi-a-GCST005647	90274846	Inverse variance weighted	12	0.0742489	0.0486182	0.126715	-0.0210427	0.169541	1.07707	0.979177	1.18476	9.66797	10	0.470091	-0.025135	0.0906821
64	Tumor necrosis factor ligand superfamily member 12 levels	ebi-a-GCST005647	Amyotrophic lateral sclerosis || id:ebi-a-GCST005647	90274846	Simple mode	12	-0.0310595	0.118583	0.798221	-0.263481	0.201362	0.969418	0.768372	1.22307	9.66797	10	0.470091	-0.025135	0.0906821
65	Tumor necrosis factor ligand superfamily member 12 levels	ebi-a-GCST005647	Amyotrophic lateral sclerosis || id:ebi-a-GCST005647	90274846	Weighted mode	12	0.147563	0.0715297	0.0635393	0.00736529	0.287762	1.15901	1.00739	1.33344	9.66797	10	0.470091	-0.025135	0.0906821
66	TNF-beta levels	ebi-a-GCST005647	Amyotrophic lateral sclerosis || id:ebi-a-GCST005647	90274840	MR Egger	15	-0.074031	0.0462556	0.133503	-0.164692	0.01663	0.928643	0.848155	1.01677	15.7818	13	0.261116	0.01221	0.369466
67	TNF-beta levels	ebi-a-GCST005647	Amyotrophic lateral sclerosis || id:ebi-a-GCST005647	90274840	Weighted median	15	-0.0339899	0.03049	0.264942	-0.0937504	0.0257706	0.966581	0.91051	1.02611	15.7818	13	0.261116	0.01221	0.369466
68	TNF-beta levels	ebi-a-GCST005647	Amyotrophic lateral sclerosis || id:ebi-a-GCST005647	90274840	Inverse variance weighted	15	-0.0387058	0.0262514	0.140367	-0.0901586	0.012747	0.962034	0.913786	1.01283	15.7818	13	0.261116	0.01221	0.369466
69	TNF-beta levels	ebi-a-GCST005647	Amyotrophic lateral sclerosis || id:ebi-a-GCST005647	90274840	Simple mode	15	-0.134181	0.0751705	0.0959339	-0.281515	0.0131536	0.874432	0.75464	1.01324	15.7818	13	0.261116	0.01221	0.369466
70	TNF-beta levels	ebi-a-GCST005647	Amyotrophic lateral sclerosis || id:ebi-a-GCST005647	90274840	Weighted mode	15	-0.0336008	0.0341113	0.341327	-0.100459	0.0332575	0.966957	0.904422	1.03382	15.7818	13	0.261116	0.01221	0.369466
71	SIR2-like protein 2 levels	ebi-a-GCST005647	Amyotrophic lateral sclerosis || id:ebi-a-GCST005647	90274834	Inverse variance weighted	2	-0.0225168	0.157048	0.885994	-0.330331	0.285297	0.977735	0.718686	1.33016	#N/A	#N/A	#N/A	NA	NA
72	Neurturin levels	ebi-a-GCST005647	Amyotrophic lateral sclerosis || id:ebi-a-GCST005647	90274828	Wald ratio	1	0.120128	0.171885	0.484624	-0.216767	0.457022	1.12764	0.805118	1.57936	#N/A	#N/A	#N/A	#N/A	#N/A
73	Oncostatin-M levels	ebi-a-GCST005647	Amyotrophic lateral sclerosis || id:ebi-a-GCST005647	90274831	MR Egger	8	0.32966	0.293466	0.304222	-0.245532	0.904853	1.3905	0.782288	2.47157	9.55739	6	0.144572	-0.0418259	0.196971
74	Oncostatin-M levels	ebi-a-GCST005647	Amyotrophic lateral sclerosis || id:ebi-a-GCST005647	90274831	Weighted median	8	-0.0440743	0.0919514	0.63171	-0.224299	0.136151	0.956883	0.799076	1.14585	9.55739	6	0.144572	-0.0418259	0.196971
75	Oncostatin-M levels	ebi-a-GCST005647	Amyotrophic lateral sclerosis || id:ebi-a-GCST005647	90274831	Inverse variance weighted	8	-0.0772844	0.0929833	0.405881	-0.259532	0.104963	0.925627	0.771413	1.11067	9.55739	6	0.144572	-0.0418259	0.196971
76	Oncostatin-M levels	ebi-a-GCST005647	Amyotrophic lateral sclerosis || id:ebi-a-GCST005647	90274831	Simple mode	8	0.143677	0.12077	0.272958	-0.0930332	0.380387	1.15451	0.911163	1.46285	9.55739	6	0.144572	-0.0418259	0.196971
77	Oncostatin-M levels	ebi-a-GCST005647	Amyotrophic lateral sclerosis || id:ebi-a-GCST005647	90274831	Weighted mode	8	-0.0381002	0.104421	0.725983	-0.242766	0.166565	0.962617	0.784455	1.18124	9.55739	6	0.144572	-0.0418259	0.196971
78	Leukemia inhibitory factor receptor levels	ebi-a-GCST005647	Amyotrophic lateral sclerosis || id:ebi-a-GCST005647	90274820	MR Egger	3	-0.399144	0.56171	0.606698	-1.50009	0.701807	0.670894	0.223109	2.01739	5.95007	1	0.0147167	0.0404405	0.659609
79	Leukemia inhibitory factor receptor levels	ebi-a-GCST005647	Amyotrophic lateral sclerosis || id:ebi-a-GCST005647	90274820	Weighted median	3	-0.140796	0.111921	0.208395	-0.360162	0.0785697	0.868666	0.697563	1.08174	5.95007	1	0.0147167	0.0404405	0.659609
80	Leukemia inhibitory factor receptor levels	ebi-a-GCST005647	Amyotrophic lateral sclerosis || id:ebi-a-GCST005647	90274820	Inverse variance weighted	3	-0.0944642	0.185309	0.610215	-0.457669	0.268741	0.90986	0.632757	1.30832	5.95007	1	0.0147167	0.0404405	0.659609
81	Leukemia inhibitory factor receptor levels	ebi-a-GCST005647	Amyotrophic lateral sclerosis || id:ebi-a-GCST005647	90274820	Simple mode	3	-0.0899657	0.208029	0.707567	-0.497702	0.317771	0.913963	0.607926	1.37406	5.95007	1	0.0147167	0.0404405	0.659609
82	Leukemia inhibitory factor receptor levels	ebi-a-GCST005647	Amyotrophic lateral sclerosis || id:ebi-a-GCST005647	90274820	Weighted mode	3	-0.215315	0.1207	0.216374	-0.451886	0.0212556	0.806287	0.636426	1.02148	5.95007	1	0.0147167	0.0404405	0.659609
83	Osteoprotegerin levels	ebi-a-GCST005647	Amyotrophic lateral sclerosis || id:ebi-a-GCST005647	90274830	MR Egger	11	-0.0654334	0.128136	0.621881	-0.31658	0.185713	0.936661	0.728637	1.20408	11.5532	9	0.239686	-0.00297254	0.839954
84	Osteoprotegerin levels	ebi-a-GCST005647	Amyotrophic lateral sclerosis || id:ebi-a-GCST005647	90274830	Weighted median	11	-0.101323	0.0646809	0.117231	-0.228097	0.0254518	0.903641	0.796047	1.02578	11.5532	9	0.239686	-0.00297254	0.839954
85	Osteoprotegerin levels	ebi-a-GCST005647	Amyotrophic lateral sclerosis || id:ebi-a-GCST005647	90274830	Inverse variance weighted	11	-0.0894377	0.0528138	0.0903694	-0.192953	0.0140774	0.914445	0.824521	1.01418	11.5532	9	0.239686	-0.00297254	0.839954
86	Osteoprotegerin levels	ebi-a-GCST005647	Amyotrophic lateral sclerosis || id:ebi-a-GCST005647	90274830	Simple mode	11	-0.134097	0.114038	0.266872	-0.357612	0.0894178	0.874505	0.699345	1.09354	11.5532	9	0.239686	-0.00297254	0.839954
87	Osteoprotegerin levels	ebi-a-GCST005647	Amyotrophic lateral sclerosis || id:ebi-a-GCST005647	90274830	Weighted mode	11	-0.078107	0.0701491	0.291566	-0.215599	0.0593852	0.924865	0.806058	1.06118	11.5532	9	0.239686	-0.00297254	0.839954
88	Adenosine Deaminase levels	ebi-a-GCST005647	Amyotrophic lateral sclerosis || id:ebi-a-GCST005647	90274759	MR Egger	8	0.0120807	0.0531978	0.827893	-0.092187	0.116348	1.01215	0.911935	1.12339	11.2307	6	0.0815034	0.0196202	0.324769
89	Adenosine Deaminase levels	ebi-a-GCST005647	Amyotrophic lateral sclerosis || id:ebi-a-GCST005647	90274759	Weighted median	8	0.0740472	0.0347197	0.0329481	0.0059966	0.142098	1.07686	1.00601	1.15269	11.2307	6	0.0815034	0.0196202	0.324769
90	Adenosine Deaminase levels	ebi-a-GCST005647	Amyotrophic lateral sclerosis || id:ebi-a-GCST005647	90274759	Inverse variance weighted	8	0.0502059	0.0399959	0.209378	-0.028186	0.128598	1.05149	0.972208	1.13723	11.2307	6	0.0815034	0.0196202	0.324769
91	Adenosine Deaminase levels	ebi-a-GCST005647	Amyotrophic lateral sclerosis || id:ebi-a-GCST005647	90274759	Simple mode	8	0.0292886	0.0793508	0.722963	-0.126239	0.184816	1.02972	0.881404	1.203	11.2307	6	0.0815034	0.0196202	0.324769
92	Adenosine Deaminase levels	ebi-a-GCST005647	Amyotrophic lateral sclerosis || id:ebi-a-GCST005647	90274759	Weighted mode	8	0.0493966	0.0347019	0.197611	-0.0186192	0.117412	1.05064	0.981553	1.12458	11.2307	6	0.0815034	0.0196202	0.324769

## Sheet: S4
Results of validation group Mendelian Randomization Analysis between 91 inflammatory proteins and ALS (snp p < 5e-6)
	id.exposure	id.outcome	outcome	exposure	method	nsnp	b	se	pval	lo_ci	up_ci	or	or_lci95	or_uci95	Q	Q_df	Q_pval	egger_intercept	pval(egger_intercept)
1	C-C motif chemokine 20 levels	ebi-a-GCST004692	Amyotrophic lateral sclerosis || id:ebi-a-GCST004692	90274766	MR Egger	17	-0.21377	0.245733	0.398046	-0.695407	0.267866	0.807534	0.498871	1.30717	26.1539	15	0.0364354	0.0290705	0.219037
2	C-C motif chemokine 20 levels	ebi-a-GCST004692	Amyotrophic lateral sclerosis || id:ebi-a-GCST004692	90274766	Weighted median	17	0.161811	0.106724	0.129476	-0.0473671	0.37099	1.17564	0.953737	1.44917	26.1539	15	0.0364354	0.0290705	0.219037
3	C-C motif chemokine 20 levels	ebi-a-GCST004692	Amyotrophic lateral sclerosis || id:ebi-a-GCST004692	90274766	Inverse variance weighted	17	0.0794407	0.0920145	0.387945	-0.100908	0.259789	1.08268	0.904016	1.29666	26.1539	15	0.0364354	0.0290705	0.219037
4	C-C motif chemokine 20 levels	ebi-a-GCST004692	Amyotrophic lateral sclerosis || id:ebi-a-GCST004692	90274766	Simple mode	17	0.30356	0.22475	0.195601	-0.136951	0.744071	1.35467	0.872013	2.10448	26.1539	15	0.0364354	0.0290705	0.219037
5	C-C motif chemokine 20 levels	ebi-a-GCST004692	Amyotrophic lateral sclerosis || id:ebi-a-GCST004692	90274766	Weighted mode	17	0.258178	0.208818	0.234161	-0.151105	0.667462	1.29457	0.859757	1.94928	26.1539	15	0.0364354	0.0290705	0.219037
6	TNF-beta levels	ebi-a-GCST004692	Amyotrophic lateral sclerosis || id:ebi-a-GCST004692	90274840	MR Egger	30	-0.0152161	0.0555736	0.786247	-0.12414	0.0937081	0.984899	0.883256	1.09824	40.7257	28	0.0568937	0.00194007	0.874288
7	TNF-beta levels	ebi-a-GCST004692	Amyotrophic lateral sclerosis || id:ebi-a-GCST004692	90274840	Weighted median	30	0.00564615	0.0411403	0.89084	-0.0749888	0.0862811	1.00566	0.927754	1.09011	40.7257	28	0.0568937	0.00194007	0.874288
8	TNF-beta levels	ebi-a-GCST004692	Amyotrophic lateral sclerosis || id:ebi-a-GCST004692	90274840	Inverse variance weighted	30	-0.00823953	0.0337582	0.807173	-0.0744056	0.0579265	0.991794	0.928295	1.05964	40.7257	28	0.0568937	0.00194007	0.874288
9	TNF-beta levels	ebi-a-GCST004692	Amyotrophic lateral sclerosis || id:ebi-a-GCST004692	90274840	Simple mode	30	0.103087	0.118784	0.392603	-0.129731	0.335904	1.10859	0.878332	1.3992	40.7257	28	0.0568937	0.00194007	0.874288
10	TNF-beta levels	ebi-a-GCST004692	Amyotrophic lateral sclerosis || id:ebi-a-GCST004692	90274840	Weighted mode	30	0.00611588	0.0431546	0.888281	-0.0784672	0.090699	1.00613	0.924532	1.09494	40.7257	28	0.0568937	0.00194007	0.874288
11	Adenosine Deaminase levels	ebi-a-GCST004692	Amyotrophic lateral sclerosis || id:ebi-a-GCST004692	90274759	MR Egger	14	0.0230269	0.051727	0.664126	-0.0783579	0.124412	1.02329	0.924633	1.13248	18.1041	12	0.112565	0.00615222	0.586456
12	Adenosine Deaminase levels	ebi-a-GCST004692	Amyotrophic lateral sclerosis || id:ebi-a-GCST004692	90274759	Weighted median	14	0.0496785	0.0445492	0.264791	-0.037638	0.136995	1.05093	0.963062	1.14682	18.1041	12	0.112565	0.00615222	0.586456
13	Adenosine Deaminase levels	ebi-a-GCST004692	Amyotrophic lateral sclerosis || id:ebi-a-GCST004692	90274759	Inverse variance weighted	14	0.0400283	0.0407188	0.325587	-0.0397805	0.119837	1.04084	0.961	1.12731	18.1041	12	0.112565	0.00615222	0.586456
14	Adenosine Deaminase levels	ebi-a-GCST004692	Amyotrophic lateral sclerosis || id:ebi-a-GCST004692	90274759	Simple mode	14	0.0887949	0.0971047	0.377143	-0.10153	0.27912	1.09286	0.903454	1.32197	18.1041	12	0.112565	0.00615222	0.586456
15	Adenosine Deaminase levels	ebi-a-GCST004692	Amyotrophic lateral sclerosis || id:ebi-a-GCST004692	90274759	Weighted mode	14	0.0563663	0.0430237	0.212832	-0.0279602	0.140693	1.05799	0.972427	1.15107	18.1041	12	0.112565	0.00615222	0.586456
16	Interleukin-5 levels	ebi-a-GCST004692	Amyotrophic lateral sclerosis || id:ebi-a-GCST004692	90274814	MR Egger	10	0.00427136	0.258472	0.98722	-0.502334	0.510877	1.00428	0.605117	1.66675	11.4716	8	0.176381	0.0020906	0.938319
17	Interleukin-5 levels	ebi-a-GCST004692	Amyotrophic lateral sclerosis || id:ebi-a-GCST004692	90274814	Weighted median	10	0.0362426	0.124983	0.771831	-0.208724	0.281209	1.03691	0.81162	1.32473	11.4716	8	0.176381	0.0020906	0.938319
18	Interleukin-5 levels	ebi-a-GCST004692	Amyotrophic lateral sclerosis || id:ebi-a-GCST004692	90274814	Inverse variance weighted	10	0.0231518	0.0984652	0.81411	-0.16984	0.216144	1.02342	0.8438	1.24128	11.4716	8	0.176381	0.0020906	0.938319
19	Interleukin-5 levels	ebi-a-GCST004692	Amyotrophic lateral sclerosis || id:ebi-a-GCST004692	90274814	Simple mode	10	0.0976446	0.213823	0.658735	-0.321448	0.516737	1.10257	0.725099	1.67655	11.4716	8	0.176381	0.0020906	0.938319
20	Interleukin-5 levels	ebi-a-GCST004692	Amyotrophic lateral sclerosis || id:ebi-a-GCST004692	90274814	Weighted mode	10	0.059653	0.229326	0.800622	-0.389827	0.509133	1.06147	0.677174	1.66385	11.4716	8	0.176381	0.0020906	0.938319
21	Osteoprotegerin levels	ebi-a-GCST004692	Amyotrophic lateral sclerosis || id:ebi-a-GCST004692	90274830	MR Egger	18	-0.131877	0.137158	0.35061	-0.400708	0.136953	0.876449	0.669846	1.14677	21.2816	16	0.167939	-0.00371951	0.813402
22	Osteoprotegerin levels	ebi-a-GCST004692	Amyotrophic lateral sclerosis || id:ebi-a-GCST004692	90274830	Weighted median	18	-0.179387	0.0752896	0.0171898	-0.326955	-0.0318192	0.835782	0.721116	0.968682	21.2816	16	0.167939	-0.00371951	0.813402
23	Osteoprotegerin levels	ebi-a-GCST004692	Amyotrophic lateral sclerosis || id:ebi-a-GCST004692	90274830	Inverse variance weighted	18	-0.161016	0.0619881	0.00938983	-0.282512	-0.039519	0.851279	0.753887	0.961252	21.2816	16	0.167939	-0.00371951	0.813402
24	Osteoprotegerin levels	ebi-a-GCST004692	Amyotrophic lateral sclerosis || id:ebi-a-GCST004692	90274830	Simple mode	18	-0.23024	0.121607	0.0754674	-0.46859	0.00811078	0.794343	0.625884	1.00814	21.2816	16	0.167939	-0.00371951	0.813402
25	Osteoprotegerin levels	ebi-a-GCST004692	Amyotrophic lateral sclerosis || id:ebi-a-GCST004692	90274830	Weighted mode	18	-0.165156	0.0807529	0.0566341	-0.323431	-0.00688001	0.847762	0.723662	0.993144	21.2816	16	0.167939	-0.00371951	0.813402
26	Neurturin levels	ebi-a-GCST004692	Amyotrophic lateral sclerosis || id:ebi-a-GCST004692	90274828	MR Egger	9	-0.178805	0.268624	0.526963	-0.705308	0.347698	0.836269	0.493956	1.4158	9.11726	7	0.244347	-0.000341454	0.990735
27	Neurturin levels	ebi-a-GCST004692	Amyotrophic lateral sclerosis || id:ebi-a-GCST004692	90274828	Weighted median	9	-0.14801	0.127024	0.243935	-0.396977	0.100958	0.862423	0.67235	1.10623	9.11726	7	0.244347	-0.000341454	0.990735
28	Neurturin levels	ebi-a-GCST004692	Amyotrophic lateral sclerosis || id:ebi-a-GCST004692	90274828	Inverse variance weighted	9	-0.181757	0.102385	0.0758595	-0.382431	0.0189174	0.833804	0.682201	1.0191	9.11726	7	0.244347	-0.000341454	0.990735
29	Neurturin levels	ebi-a-GCST004692	Amyotrophic lateral sclerosis || id:ebi-a-GCST004692	90274828	Simple mode	9	-0.175092	0.222578	0.454154	-0.611346	0.261161	0.83938	0.54262	1.29844	9.11726	7	0.244347	-0.000341454	0.990735
30	Neurturin levels	ebi-a-GCST004692	Amyotrophic lateral sclerosis || id:ebi-a-GCST004692	90274828	Weighted mode	9	-0.141148	0.205553	0.511698	-0.544033	0.261737	0.868361	0.580403	1.29918	9.11726	7	0.244347	-0.000341454	0.990735
31	Tumor necrosis factor ligand superfamily member 12 levels	ebi-a-GCST004692	Amyotrophic lateral sclerosis || id:ebi-a-GCST004692	90274846	MR Egger	21	0.326317	0.104673	0.00566963	0.121158	0.531476	1.38585	1.1288	1.70144	15.4888	19	0.691066	-0.024883	0.0422652
32	Tumor necrosis factor ligand superfamily member 12 levels	ebi-a-GCST004692	Amyotrophic lateral sclerosis || id:ebi-a-GCST004692	90274846	Weighted median	21	0.195626	0.0731169	0.00746132	0.0523167	0.338935	1.21607	1.05371	1.40345	15.4888	19	0.691066	-0.024883	0.0422652
33	Tumor necrosis factor ligand superfamily member 12 levels	ebi-a-GCST004692	Amyotrophic lateral sclerosis || id:ebi-a-GCST004692	90274846	Inverse variance weighted	21	0.12844	0.052232	0.0139314	0.0260652	0.230815	1.13705	1.02641	1.25963	15.4888	19	0.691066	-0.024883	0.0422652
34	Tumor necrosis factor ligand superfamily member 12 levels	ebi-a-GCST004692	Amyotrophic lateral sclerosis || id:ebi-a-GCST004692	90274846	Simple mode	21	0.183578	0.143261	0.214704	-0.0972139	0.464369	1.20151	0.907362	1.59101	15.4888	19	0.691066	-0.024883	0.0422652
35	Tumor necrosis factor ligand superfamily member 12 levels	ebi-a-GCST004692	Amyotrophic lateral sclerosis || id:ebi-a-GCST004692	90274846	Weighted mode	21	0.211193	0.0823962	0.018545	0.0496963	0.372689	1.23515	1.05095	1.45163	15.4888	19	0.691066	-0.024883	0.0422652
36	Interleukin-10 levels	ebi-a-GCST004692	Amyotrophic lateral sclerosis || id:ebi-a-GCST004692	90274795	MR Egger	21	0.0847266	0.138674	0.548454	-0.187073	0.356527	1.08842	0.829383	1.42836	8.53486	19	0.980433	-0.0144959	0.280318
37	Interleukin-10 levels	ebi-a-GCST004692	Amyotrophic lateral sclerosis || id:ebi-a-GCST004692	90274795	Weighted median	21	-0.00716488	0.0802981	0.9289	-0.164549	0.150219	0.992861	0.848276	1.16209	8.53486	19	0.980433	-0.0144959	0.280318
38	Interleukin-10 levels	ebi-a-GCST004692	Amyotrophic lateral sclerosis || id:ebi-a-GCST004692	90274795	Inverse variance weighted	21	-0.0545314	0.0593851	0.358479	-0.170926	0.0618634	0.946929	0.842884	1.06382	8.53486	19	0.980433	-0.0144959	0.280318
39	Interleukin-10 levels	ebi-a-GCST004692	Amyotrophic lateral sclerosis || id:ebi-a-GCST004692	90274795	Simple mode	21	0.0747413	0.147854	0.618728	-0.215052	0.364535	1.07761	0.806499	1.43984	8.53486	19	0.980433	-0.0144959	0.280318
40	Interleukin-10 levels	ebi-a-GCST004692	Amyotrophic lateral sclerosis || id:ebi-a-GCST004692	90274795	Weighted mode	21	0.0772289	0.12345	0.538658	-0.164733	0.319191	1.08029	0.84812	1.37601	8.53486	19	0.980433	-0.0144959	0.280318
41	SIR2-like protein 2 levels	ebi-a-GCST004692	Amyotrophic lateral sclerosis || id:ebi-a-GCST004692	90274834	MR Egger	8	-0.268234	0.579167	0.659589	-1.4034	0.866933	0.764729	0.24576	2.3796	3.22787	6	0.779751	0.027108	0.642871
42	SIR2-like protein 2 levels	ebi-a-GCST004692	Amyotrophic lateral sclerosis || id:ebi-a-GCST004692	90274834	Weighted median	8	0.0292472	0.145409	0.840591	-0.255755	0.314249	1.02968	0.774332	1.36923	3.22787	6	0.779751	0.027108	0.642871
43	SIR2-like protein 2 levels	ebi-a-GCST004692	Amyotrophic lateral sclerosis || id:ebi-a-GCST004692	90274834	Inverse variance weighted	8	0.0089709	0.112952	0.936697	-0.212414	0.230356	1.00901	0.80863	1.25905	3.22787	6	0.779751	0.027108	0.642871
44	SIR2-like protein 2 levels	ebi-a-GCST004692	Amyotrophic lateral sclerosis || id:ebi-a-GCST004692	90274834	Simple mode	8	-0.142374	0.229093	0.553984	-0.591397	0.306649	0.867297	0.553553	1.35886	3.22787	6	0.779751	0.027108	0.642871
45	SIR2-like protein 2 levels	ebi-a-GCST004692	Amyotrophic lateral sclerosis || id:ebi-a-GCST004692	90274834	Weighted mode	8	0.102437	0.225649	0.663593	-0.339836	0.54471	1.10787	0.711887	1.72411	3.22787	6	0.779751	0.027108	0.642871
46	Interleukin-17C levels	ebi-a-GCST004692	Amyotrophic lateral sclerosis || id:ebi-a-GCST004692	90274802	MR Egger	15	0.0537098	0.174008	0.762468	-0.287345	0.394765	1.05518	0.750253	1.48404	7.98011	13	0.844894	-0.00476151	0.802372
47	Interleukin-17C levels	ebi-a-GCST004692	Amyotrophic lateral sclerosis || id:ebi-a-GCST004692	90274802	Weighted median	15	0.0937379	0.0896267	0.295621	-0.0819305	0.269406	1.09827	0.921336	1.30919	7.98011	13	0.844894	-0.00476151	0.802372
48	Interleukin-17C levels	ebi-a-GCST004692	Amyotrophic lateral sclerosis || id:ebi-a-GCST004692	90274802	Inverse variance weighted	15	0.012857	0.0685778	0.851283	-0.121555	0.147269	1.01294	0.885542	1.15867	7.98011	13	0.844894	-0.00476151	0.802372
49	Interleukin-17C levels	ebi-a-GCST004692	Amyotrophic lateral sclerosis || id:ebi-a-GCST004692	90274802	Simple mode	15	0.10515	0.163481	0.530492	-0.215273	0.425573	1.11088	0.806322	1.53047	7.98011	13	0.844894	-0.00476151	0.802372
50	Interleukin-17C levels	ebi-a-GCST004692	Amyotrophic lateral sclerosis || id:ebi-a-GCST004692	90274802	Weighted mode	15	0.1275	0.147115	0.400734	-0.160845	0.415845	1.13598	0.851424	1.51565	7.98011	13	0.844894	-0.00476151	0.802372
51	Oncostatin-M levels	ebi-a-GCST004692	Amyotrophic lateral sclerosis || id:ebi-a-GCST004692	90274831	MR Egger	13	-0.0187947	0.298612	0.950943	-0.604074	0.566485	0.981381	0.54658	1.76206	22.121	11	0.0234528	0.00442842	0.877083
52	Oncostatin-M levels	ebi-a-GCST004692	Amyotrophic lateral sclerosis || id:ebi-a-GCST004692	90274831	Weighted median	13	-0.0213768	0.10596	0.840116	-0.229058	0.186304	0.97885	0.795283	1.20479	22.121	11	0.0234528	0.00442842	0.877083
53	Oncostatin-M levels	ebi-a-GCST004692	Amyotrophic lateral sclerosis || id:ebi-a-GCST004692	90274831	Inverse variance weighted	13	0.0256017	0.098312	0.794545	-0.16709	0.218293	1.02593	0.846124	1.24395	22.121	11	0.0234528	0.00442842	0.877083
54	Oncostatin-M levels	ebi-a-GCST004692	Amyotrophic lateral sclerosis || id:ebi-a-GCST004692	90274831	Simple mode	13	0.044286	0.164028	0.791755	-0.277209	0.365781	1.04528	0.757896	1.44164	22.121	11	0.0234528	0.00442842	0.877083
55	Oncostatin-M levels	ebi-a-GCST004692	Amyotrophic lateral sclerosis || id:ebi-a-GCST004692	90274831	Weighted mode	13	-0.032537	0.132231	0.809792	-0.291709	0.226635	0.967987	0.746986	1.25437	22.121	11	0.0234528	0.00442842	0.877083
56	Leukemia inhibitory factor receptor levels	ebi-a-GCST004692	Amyotrophic lateral sclerosis || id:ebi-a-GCST004692	90274820	MR Egger	12	0.0613235	0.220418	0.786516	-0.370696	0.493343	1.06324	0.690254	1.63778	5.45221	10	0.858999	-0.00306324	0.878585
57	Leukemia inhibitory factor receptor levels	ebi-a-GCST004692	Amyotrophic lateral sclerosis || id:ebi-a-GCST004692	90274820	Weighted median	12	0.0283214	0.106104	0.78953	-0.179643	0.236285	1.02873	0.835569	1.26654	5.45221	10	0.858999	-0.00306324	0.878585
58	Leukemia inhibitory factor receptor levels	ebi-a-GCST004692	Amyotrophic lateral sclerosis || id:ebi-a-GCST004692	90274820	Inverse variance weighted	12	0.029231	0.0815508	0.720015	-0.130609	0.189071	1.02966	0.877561	1.20813	5.45221	10	0.858999	-0.00306324	0.878585
59	Leukemia inhibitory factor receptor levels	ebi-a-GCST004692	Amyotrophic lateral sclerosis || id:ebi-a-GCST004692	90274820	Simple mode	12	-0.0389416	0.173237	0.826266	-0.378487	0.300604	0.961807	0.684897	1.35067	5.45221	10	0.858999	-0.00306324	0.878585
60	Leukemia inhibitory factor receptor levels	ebi-a-GCST004692	Amyotrophic lateral sclerosis || id:ebi-a-GCST004692	90274820	Weighted mode	12	-0.00537423	0.168326	0.975102	-0.335293	0.324544	0.99464	0.715129	1.3834	5.45221	10	0.858999	-0.00306324	0.878585
61	C-C motif chemokine 20 levels	ebi-a-GCST005647	Amyotrophic lateral sclerosis || id:ebi-a-GCST005647	90274766	MR Egger	20	0.0874898	0.153765	0.576399	-0.21389	0.38887	1.09143	0.807437	1.47531	25.1952	18	0.119633	-0.00601197	0.689998
62	C-C motif chemokine 20 levels	ebi-a-GCST005647	Amyotrophic lateral sclerosis || id:ebi-a-GCST005647	90274766	Weighted median	20	0.0737246	0.0779406	0.344196	-0.079039	0.226488	1.07651	0.924004	1.25419	25.1952	18	0.119633	-0.00601197	0.689998
63	C-C motif chemokine 20 levels	ebi-a-GCST005647	Amyotrophic lateral sclerosis || id:ebi-a-GCST005647	90274766	Inverse variance weighted	20	0.0301927	0.0591793	0.609918	-0.0857988	0.146184	1.03065	0.917779	1.15741	25.1952	18	0.119633	-0.00601197	0.689998
64	C-C motif chemokine 20 levels	ebi-a-GCST005647	Amyotrophic lateral sclerosis || id:ebi-a-GCST005647	90274766	Simple mode	20	0.16628	0.145986	0.268857	-0.119853	0.452412	1.1809	0.887051	1.5721	25.1952	18	0.119633	-0.00601197	0.689998
65	C-C motif chemokine 20 levels	ebi-a-GCST005647	Amyotrophic lateral sclerosis || id:ebi-a-GCST005647	90274766	Weighted mode	20	0.14253	0.138179	0.315264	-0.128301	0.413362	1.15319	0.879588	1.51189	25.1952	18	0.119633	-0.00601197	0.689998
66	TNF-beta levels	ebi-a-GCST005647	Amyotrophic lateral sclerosis || id:ebi-a-GCST005647	90274840	MR Egger	35	-0.065822	0.0383019	0.0950751	-0.140894	0.00924982	0.936298	0.868582	1.00929	39.7379	33	0.194978	0.00879075	0.291858
67	TNF-beta levels	ebi-a-GCST005647	Amyotrophic lateral sclerosis || id:ebi-a-GCST005647	90274840	Weighted median	35	-0.0313913	0.0314302	0.31791	-0.0929945	0.0302119	0.969096	0.911198	1.03067	39.7379	33	0.194978	0.00879075	0.291858
68	TNF-beta levels	ebi-a-GCST005647	Amyotrophic lateral sclerosis || id:ebi-a-GCST005647	90274840	Inverse variance weighted	35	-0.0338608	0.0240683	0.159468	-0.0810347	0.0133131	0.966706	0.922162	1.0134	39.7379	33	0.194978	0.00879075	0.291858
69	TNF-beta levels	ebi-a-GCST005647	Amyotrophic lateral sclerosis || id:ebi-a-GCST005647	90274840	Simple mode	35	-0.0276243	0.0762502	0.719382	-0.177075	0.121826	0.972754	0.837717	1.12956	39.7379	33	0.194978	0.00879075	0.291858
70	TNF-beta levels	ebi-a-GCST005647	Amyotrophic lateral sclerosis || id:ebi-a-GCST005647	90274840	Weighted mode	35	-0.034177	0.0309065	0.276568	-0.0947536	0.0263997	0.9664	0.909597	1.02675	39.7379	33	0.194978	0.00879075	0.291858
71	Adenosine Deaminase levels	ebi-a-GCST005647	Amyotrophic lateral sclerosis || id:ebi-a-GCST005647	90274759	MR Egger	17	0.0343517	0.0386112	0.387683	-0.0413263	0.11003	1.03495	0.959516	1.11631	18.7906	15	0.22338	0.00585277	0.497054
72	Adenosine Deaminase levels	ebi-a-GCST005647	Amyotrophic lateral sclerosis || id:ebi-a-GCST005647	90274759	Weighted median	17	0.0735499	0.0353741	0.0375986	0.00421674	0.142883	1.07632	1.00423	1.15359	18.7906	15	0.22338	0.00585277	0.497054
73	Adenosine Deaminase levels	ebi-a-GCST005647	Amyotrophic lateral sclerosis || id:ebi-a-GCST005647	90274759	Inverse variance weighted	17	0.0504828	0.0303806	0.0965773	-0.00906319	0.110029	1.05178	0.990978	1.11631	18.7906	15	0.22338	0.00585277	0.497054
74	Adenosine Deaminase levels	ebi-a-GCST005647	Amyotrophic lateral sclerosis || id:ebi-a-GCST005647	90274759	Simple mode	17	-0.061902	0.097349	0.533847	-0.252706	0.128902	0.939975	0.776696	1.13758	18.7906	15	0.22338	0.00585277	0.497054
75	Adenosine Deaminase levels	ebi-a-GCST005647	Amyotrophic lateral sclerosis || id:ebi-a-GCST005647	90274759	Weighted mode	17	0.0633758	0.0352259	0.0908871	-0.00566706	0.132419	1.06543	0.994349	1.14159	18.7906	15	0.22338	0.00585277	0.497054
76	Interleukin-5 levels	ebi-a-GCST005647	Amyotrophic lateral sclerosis || id:ebi-a-GCST005647	90274814	MR Egger	12	-0.0163974	0.188675	0.93246	-0.386201	0.353406	0.983736	0.679634	1.42391	14.587	10	0.147861	0.00466794	0.816366
77	Interleukin-5 levels	ebi-a-GCST005647	Amyotrophic lateral sclerosis || id:ebi-a-GCST005647	90274814	Weighted median	12	-0.0417134	0.0900944	0.643367	-0.218299	0.134872	0.959145	0.803885	1.14439	14.587	10	0.147861	0.00466794	0.816366
78	Interleukin-5 levels	ebi-a-GCST005647	Amyotrophic lateral sclerosis || id:ebi-a-GCST005647	90274814	Inverse variance weighted	12	0.0244634	0.0754591	0.745791	-0.123436	0.172363	1.02477	0.883878	1.18811	14.587	10	0.147861	0.00466794	0.816366
79	Interleukin-5 levels	ebi-a-GCST005647	Amyotrophic lateral sclerosis || id:ebi-a-GCST005647	90274814	Simple mode	12	-0.107305	0.1449	0.474482	-0.391309	0.1767	0.898252	0.676171	1.19327	14.587	10	0.147861	0.00466794	0.816366
80	Interleukin-5 levels	ebi-a-GCST005647	Amyotrophic lateral sclerosis || id:ebi-a-GCST005647	90274814	Weighted mode	12	-0.114445	0.145015	0.446673	-0.398674	0.169783	0.891861	0.671209	1.18505	14.587	10	0.147861	0.00466794	0.816366
81	Osteoprotegerin levels	ebi-a-GCST005647	Amyotrophic lateral sclerosis || id:ebi-a-GCST005647	90274830	MR Egger	21	-0.139395	0.105856	0.203557	-0.346874	0.0680833	0.869884	0.706895	1.07045	25.7424	19	0.137527	0.0116199	0.341019
82	Osteoprotegerin levels	ebi-a-GCST005647	Amyotrophic lateral sclerosis || id:ebi-a-GCST005647	90274830	Weighted median	21	-0.070876	0.0609962	0.245246	-0.190428	0.0486766	0.931577	0.826605	1.04988	25.7424	19	0.137527	0.0116199	0.341019
83	Osteoprotegerin levels	ebi-a-GCST005647	Amyotrophic lateral sclerosis || id:ebi-a-GCST005647	90274830	Inverse variance weighted	21	-0.0478961	0.04922	0.330503	-0.144367	0.0485751	0.953233	0.86557	1.04977	25.7424	19	0.137527	0.0116199	0.341019
84	Osteoprotegerin levels	ebi-a-GCST005647	Amyotrophic lateral sclerosis || id:ebi-a-GCST005647	90274830	Simple mode	21	-0.118079	0.101981	0.260565	-0.317963	0.0818042	0.888626	0.72763	1.08524	25.7424	19	0.137527	0.0116199	0.341019
85	Osteoprotegerin levels	ebi-a-GCST005647	Amyotrophic lateral sclerosis || id:ebi-a-GCST005647	90274830	Weighted mode	21	-0.083001	0.062962	0.202312	-0.206407	0.0404046	0.92035	0.813502	1.04123	25.7424	19	0.137527	0.0116199	0.341019
86	Neurturin levels	ebi-a-GCST005647	Amyotrophic lateral sclerosis || id:ebi-a-GCST005647	90274828	MR Egger	14	-0.0472523	0.181979	0.799529	-0.403931	0.309426	0.953847	0.66769	1.36264	13.0072	12	0.36852	-0.0067867	0.689803
87	Neurturin levels	ebi-a-GCST005647	Amyotrophic lateral sclerosis || id:ebi-a-GCST005647	90274828	Weighted median	14	-0.146745	0.0863837	0.0893648	-0.316057	0.0225671	0.863514	0.729018	1.02282	13.0072	12	0.36852	-0.0067867	0.689803
88	Neurturin levels	ebi-a-GCST005647	Amyotrophic lateral sclerosis || id:ebi-a-GCST005647	90274828	Inverse variance weighted	14	-0.116888	0.0620733	0.0596918	-0.238552	0.0047757	0.889685	0.787768	1.00479	13.0072	12	0.36852	-0.0067867	0.689803
89	Neurturin levels	ebi-a-GCST005647	Amyotrophic lateral sclerosis || id:ebi-a-GCST005647	90274828	Simple mode	14	-0.116191	0.155827	0.469153	-0.421613	0.189231	0.890305	0.655988	1.20832	13.0072	12	0.36852	-0.0067867	0.689803
90	Neurturin levels	ebi-a-GCST005647	Amyotrophic lateral sclerosis || id:ebi-a-GCST005647	90274828	Weighted mode	14	-0.0935497	0.137886	0.50938	-0.363806	0.176707	0.910693	0.695026	1.19328	13.0072	12	0.36852	-0.0067867	0.689803
91	Tumor necrosis factor ligand superfamily member 12 levels	ebi-a-GCST005647	Amyotrophic lateral sclerosis || id:ebi-a-GCST005647	90274846	MR Egger	28	0.182086	0.0786598	0.0287779	0.0279131	0.33626	1.19972	1.02831	1.3997	26.3425	26	0.444409	-0.0126412	0.151504
92	Tumor necrosis factor ligand superfamily member 12 levels	ebi-a-GCST005647	Amyotrophic lateral sclerosis || id:ebi-a-GCST005647	90274846	Weighted median	28	0.117276	0.054719	0.0320938	0.0100267	0.224525	1.12443	1.01008	1.25173	26.3425	26	0.444409	-0.0126412	0.151504
93	Tumor necrosis factor ligand superfamily member 12 levels	ebi-a-GCST005647	Amyotrophic lateral sclerosis || id:ebi-a-GCST005647	90274846	Inverse variance weighted	28	0.0797654	0.038127	0.0364298	0.00503647	0.154494	1.08303	1.00505	1.16707	26.3425	26	0.444409	-0.0126412	0.151504
94	Tumor necrosis factor ligand superfamily member 12 levels	ebi-a-GCST005647	Amyotrophic lateral sclerosis || id:ebi-a-GCST005647	90274846	Simple mode	28	0.0457249	0.107184	0.673053	-0.164357	0.255807	1.04679	0.848439	1.2915	26.3425	26	0.444409	-0.0126412	0.151504
95	Tumor necrosis factor ligand superfamily member 12 levels	ebi-a-GCST005647	Amyotrophic lateral sclerosis || id:ebi-a-GCST005647	90274846	Weighted mode	28	0.125075	0.062613	0.0559282	0.00235372	0.247797	1.13323	1.00236	1.2812	26.3425	26	0.444409	-0.0126412	0.151504
96	Interleukin-10 levels	ebi-a-GCST005647	Amyotrophic lateral sclerosis || id:ebi-a-GCST005647	90274795	MR Egger	26	-0.0147245	0.109197	0.893861	-0.228751	0.199302	0.985383	0.795526	1.22055	21.4489	24	0.612126	6.53338e-05	0.994979
97	Interleukin-10 levels	ebi-a-GCST005647	Amyotrophic lateral sclerosis || id:ebi-a-GCST005647	90274795	Weighted median	26	0.0431153	0.0685487	0.529366	-0.0912401	0.177471	1.04406	0.912798	1.19419	21.4489	24	0.612126	6.53338e-05	0.994979
98	Interleukin-10 levels	ebi-a-GCST005647	Amyotrophic lateral sclerosis || id:ebi-a-GCST005647	90274795	Inverse variance weighted	26	-0.0140953	0.0462016	0.760303	-0.10465	0.0764598	0.986004	0.900639	1.07946	21.4489	24	0.612126	6.53338e-05	0.994979
99	Interleukin-10 levels	ebi-a-GCST005647	Amyotrophic lateral sclerosis || id:ebi-a-GCST005647	90274795	Simple mode	26	-0.0507589	0.125025	0.688203	-0.295807	0.194289	0.950508	0.743931	1.21445	21.4489	24	0.612126	6.53338e-05	0.994979
100	Interleukin-10 levels	ebi-a-GCST005647	Amyotrophic lateral sclerosis || id:ebi-a-GCST005647	90274795	Weighted mode	26	0.0788544	0.0957276	0.417878	-0.108772	0.26648	1.08205	0.896935	1.30536	21.4489	24	0.612126	6.53338e-05	0.994979
101	SIR2-like protein 2 levels	ebi-a-GCST005647	Amyotrophic lateral sclerosis || id:ebi-a-GCST005647	90274834	MR Egger	12	-0.0206955	0.288906	0.944305	-0.58695	0.545559	0.979517	0.55602	1.72557	1.95555	10	0.99667	-0.00209623	0.938113
102	SIR2-like protein 2 levels	ebi-a-GCST005647	Amyotrophic lateral sclerosis || id:ebi-a-GCST005647	90274834	Weighted median	12	-0.0258891	0.0961341	0.787697	-0.214312	0.162534	0.974443	0.807097	1.17649	1.95555	10	0.99667	-0.00209623	0.938113
103	SIR2-like protein 2 levels	ebi-a-GCST005647	Amyotrophic lateral sclerosis || id:ebi-a-GCST005647	90274834	Inverse variance weighted	12	-0.0429177	0.0745778	0.564969	-0.18909	0.103255	0.95799	0.827712	1.10877	1.95555	10	0.99667	-0.00209623	0.938113
104	SIR2-like protein 2 levels	ebi-a-GCST005647	Amyotrophic lateral sclerosis || id:ebi-a-GCST005647	90274834	Simple mode	12	-0.0267918	0.143255	0.855049	-0.307572	0.253988	0.973564	0.73523	1.28916	1.95555	10	0.99667	-0.00209623	0.938113
105	SIR2-like protein 2 levels	ebi-a-GCST005647	Amyotrophic lateral sclerosis || id:ebi-a-GCST005647	90274834	Weighted mode	12	-0.0251681	0.143926	0.86436	-0.307264	0.256928	0.975146	0.735456	1.29295	1.95555	10	0.99667	-0.00209623	0.938113
106	Interleukin-17C levels	ebi-a-GCST005647	Amyotrophic lateral sclerosis || id:ebi-a-GCST005647	90274802	MR Egger	20	0.110703	0.117917	0.360253	-0.120415	0.341821	1.11706	0.886552	1.40751	12.5604	18	0.816999	-0.015288	0.229141
107	Interleukin-17C levels	ebi-a-GCST005647	Amyotrophic lateral sclerosis || id:ebi-a-GCST005647	90274802	Weighted median	20	-0.0053067	0.0636709	0.933577	-0.130102	0.119488	0.994707	0.878006	1.12692	12.5604	18	0.816999	-0.015288	0.229141
108	Interleukin-17C levels	ebi-a-GCST005647	Amyotrophic lateral sclerosis || id:ebi-a-GCST005647	90274802	Inverse variance weighted	20	-0.0238351	0.0471664	0.613319	-0.116281	0.068611	0.976447	0.890225	1.07102	12.5604	18	0.816999	-0.015288	0.229141
109	Interleukin-17C levels	ebi-a-GCST005647	Amyotrophic lateral sclerosis || id:ebi-a-GCST005647	90274802	Simple mode	20	-0.0630082	0.125034	0.620105	-0.308075	0.182059	0.938936	0.73486	1.19968	12.5604	18	0.816999	-0.015288	0.229141
110	Interleukin-17C levels	ebi-a-GCST005647	Amyotrophic lateral sclerosis || id:ebi-a-GCST005647	90274802	Weighted mode	20	-0.040628	0.115009	0.727783	-0.266046	0.18479	0.960186	0.766404	1.20297	12.5604	18	0.816999	-0.015288	0.229141
111	Oncostatin-M levels	ebi-a-GCST005647	Amyotrophic lateral sclerosis || id:ebi-a-GCST005647	90274831	MR Egger	17	0.0718626	0.223038	0.751749	-0.365292	0.509017	1.07451	0.693994	1.66365	30.4769	15	0.0103135	-0.0107139	0.618781
112	Oncostatin-M levels	ebi-a-GCST005647	Amyotrophic lateral sclerosis || id:ebi-a-GCST005647	90274831	Weighted median	17	-0.0456334	0.0812604	0.574409	-0.204904	0.113637	0.955392	0.814726	1.12035	30.4769	15	0.0103135	-0.0107139	0.618781
113	Oncostatin-M levels	ebi-a-GCST005647	Amyotrophic lateral sclerosis || id:ebi-a-GCST005647	90274831	Inverse variance weighted	17	-0.0345118	0.0750946	0.645819	-0.181697	0.112674	0.966077	0.833854	1.11927	30.4769	15	0.0103135	-0.0107139	0.618781
114	Oncostatin-M levels	ebi-a-GCST005647	Amyotrophic lateral sclerosis || id:ebi-a-GCST005647	90274831	Simple mode	17	-0.0499131	0.130312	0.706741	-0.305325	0.205499	0.951312	0.736884	1.22814	30.4769	15	0.0103135	-0.0107139	0.618781
115	Oncostatin-M levels	ebi-a-GCST005647	Amyotrophic lateral sclerosis || id:ebi-a-GCST005647	90274831	Weighted mode	17	-0.0453272	0.0991915	0.653838	-0.239743	0.149088	0.955685	0.78683	1.16078	30.4769	15	0.0103135	-0.0107139	0.618781
116	Leukemia inhibitory factor receptor levels	ebi-a-GCST005647	Amyotrophic lateral sclerosis || id:ebi-a-GCST005647	90274820	MR Egger	17	-0.077645	0.132803	0.567465	-0.337939	0.182649	0.925293	0.713239	1.20039	19.47	15	0.193218	0.00483096	0.721461
117	Leukemia inhibitory factor receptor levels	ebi-a-GCST005647	Amyotrophic lateral sclerosis || id:ebi-a-GCST005647	90274820	Weighted median	17	-0.0198541	0.0806969	0.805657	-0.17802	0.138312	0.980342	0.836926	1.14833	19.47	15	0.193218	0.00483096	0.721461
118	Leukemia inhibitory factor receptor levels	ebi-a-GCST005647	Amyotrophic lateral sclerosis || id:ebi-a-GCST005647	90274820	Inverse variance weighted	17	-0.0346301	0.0584851	0.553771	-0.149261	0.0800007	0.965963	0.861344	1.08329	19.47	15	0.193218	0.00483096	0.721461
119	Leukemia inhibitory factor receptor levels	ebi-a-GCST005647	Amyotrophic lateral sclerosis || id:ebi-a-GCST005647	90274820	Simple mode	17	0.0620361	0.158026	0.699818	-0.247694	0.371766	1.064	0.780599	1.45029	19.47	15	0.193218	0.00483096	0.721461
120	Leukemia inhibitory factor receptor levels	ebi-a-GCST005647	Amyotrophic lateral sclerosis || id:ebi-a-GCST005647	90274820	Weighted mode	17	0.0697046	0.167597	0.683003	-0.258785	0.398194	1.07219	0.771989	1.48913	19.47	15	0.193218	0.00483096	0.721461

## Sheet: S5
Results of validation group Mendelian Randomization Analysis between ALS and 91 inflammatory proteins(snp p < 5e-8)
	id.exposure	id.outcome	outcome	exposure	method	nsnp	b	se	pval	lo_ci	up_ci	or	or_lci95	or_uci95	Q	Q_df	Q_pval	egger_intercept	pval(egger_intercept)
1	ebi-a-GCST004692	Adenosine Deaminase levels	90274759	|| id:ebi-a-GCST004692	MR Egger	5	-0.105287	0.25827	0.710867	-0.611496	0.400922	0.900066	0.542538	1.4932	12.8233	3	0.0050348	0.00985028	0.83134
2	ebi-a-GCST004692	Adenosine Deaminase levels	90274759	|| id:ebi-a-GCST004692	Weighted median	5	-0.0799801	0.0683785	0.242135	-0.214002	0.0540419	0.923135	0.807347	1.05553	12.8233	3	0.0050348	0.00985028	0.83134
3	ebi-a-GCST004692	Adenosine Deaminase levels	90274759	|| id:ebi-a-GCST004692	Inverse variance weighted	5	-0.0499349	0.0867798	0.565006	-0.220023	0.120153	0.951291	0.8025	1.12767	12.8233	3	0.0050348	0.00985028	0.83134
4	ebi-a-GCST004692	Adenosine Deaminase levels	90274759	|| id:ebi-a-GCST004692	Simple mode	5	-0.040158	0.130217	0.773177	-0.295384	0.215068	0.960638	0.744246	1.23995	12.8233	3	0.0050348	0.00985028	0.83134
5	ebi-a-GCST004692	Adenosine Deaminase levels	90274759	|| id:ebi-a-GCST004692	Weighted mode	5	-0.12584	0.0753711	0.17032	-0.273568	0.0218873	0.881756	0.760661	1.02213	12.8233	3	0.0050348	0.00985028	0.83134
6	ebi-a-GCST005647	Adenosine Deaminase levels	90274759	|| id:ebi-a-GCST005647	MR Egger	7	-0.0617615	0.133221	0.662414	-0.322874	0.199351	0.940107	0.724065	1.22061	9.69132	5	0.0844693	0.0142092	0.543029
7	ebi-a-GCST005647	Adenosine Deaminase levels	90274759	|| id:ebi-a-GCST005647	Weighted median	7	0.0123458	0.0667957	0.853363	-0.118574	0.143265	1.01242	0.888186	1.15404	9.69132	5	0.0844693	0.0142092	0.543029
8	ebi-a-GCST005647	Adenosine Deaminase levels	90274759	|| id:ebi-a-GCST005647	Inverse variance weighted	7	0.0155379	0.0578647	0.788298	-0.0978768	0.128953	1.01566	0.906761	1.13764	9.69132	5	0.0844693	0.0142092	0.543029
9	ebi-a-GCST005647	Adenosine Deaminase levels	90274759	|| id:ebi-a-GCST005647	Simple mode	7	0.0396552	0.120109	0.752503	-0.195759	0.275069	1.04045	0.822211	1.31662	9.69132	5	0.0844693	0.0142092	0.543029
10	ebi-a-GCST005647	Adenosine Deaminase levels	90274759	|| id:ebi-a-GCST005647	Weighted mode	7	-0.100714	0.0952081	0.33085	-0.287322	0.0858937	0.904191	0.75027	1.08969	9.69132	5	0.0844693	0.0142092	0.543029
11	ebi-a-GCST004692	C-C motif chemokine 20 levels	90274766	|| id:ebi-a-GCST004692	MR Egger	5	0.148182	0.124897	0.320849	-0.0966167	0.392981	1.15972	0.907904	1.48139	2.44005	3	0.486222	-0.0121588	0.595598
12	ebi-a-GCST004692	C-C motif chemokine 20 levels	90274766	|| id:ebi-a-GCST004692	Weighted median	5	0.110721	0.0579565	0.0560785	-0.00287317	0.224316	1.11708	0.997131	1.25147	2.44005	3	0.486222	-0.0121588	0.595598
13	ebi-a-GCST004692	C-C motif chemokine 20 levels	90274766	|| id:ebi-a-GCST004692	Inverse variance weighted	5	0.0801016	0.0486506	0.0996677	-0.0152536	0.175457	1.0834	0.984862	1.19179	2.44005	3	0.486222	-0.0121588	0.595598
14	ebi-a-GCST004692	C-C motif chemokine 20 levels	90274766	|| id:ebi-a-GCST004692	Simple mode	5	0.125939	0.0862369	0.217971	-0.0430856	0.294963	1.13421	0.957829	1.34308	2.44005	3	0.486222	-0.0121588	0.595598
15	ebi-a-GCST004692	C-C motif chemokine 20 levels	90274766	|| id:ebi-a-GCST004692	Weighted mode	5	0.120358	0.0772004	0.193997	-0.0309552	0.27167	1.1279	0.969519	1.31215	2.44005	3	0.486222	-0.0121588	0.595598
16	ebi-a-GCST005647	C-C motif chemokine 20 levels	90274766	|| id:ebi-a-GCST005647	MR Egger	7	0.0461856	0.110601	0.693574	-0.170592	0.262963	1.04727	0.843166	1.30078	6.59774	5	0.252317	0.00870834	0.650269
17	ebi-a-GCST005647	C-C motif chemokine 20 levels	90274766	|| id:ebi-a-GCST005647	Weighted median	7	0.108531	0.057926	0.0609841	-0.0050042	0.222066	1.11464	0.995008	1.24865	6.59774	5	0.252317	0.00870834	0.650269
18	ebi-a-GCST005647	C-C motif chemokine 20 levels	90274766	|| id:ebi-a-GCST005647	Inverse variance weighted	7	0.0935322	0.0474058	0.0484941	0.000616903	0.186447	1.09805	1.00062	1.20496	6.59774	5	0.252317	0.00870834	0.650269
19	ebi-a-GCST005647	C-C motif chemokine 20 levels	90274766	|| id:ebi-a-GCST005647	Simple mode	7	0.108815	0.0901459	0.272817	-0.0678707	0.285501	1.11496	0.934381	1.33043	6.59774	5	0.252317	0.00870834	0.650269
20	ebi-a-GCST005647	C-C motif chemokine 20 levels	90274766	|| id:ebi-a-GCST005647	Weighted mode	7	0.111937	0.0756116	0.189261	-0.0362622	0.260135	1.11844	0.964387	1.29711	6.59774	5	0.252317	0.00870834	0.650269
21	ebi-a-GCST004692	Interleukin-10 levels	90274795	|| id:ebi-a-GCST004692	MR Egger	5	-0.0500961	0.124837	0.715079	-0.294776	0.194584	0.951138	0.744698	1.21481	0.551445	3	0.907452	0.0125337	0.584612
22	ebi-a-GCST004692	Interleukin-10 levels	90274795	|| id:ebi-a-GCST004692	Weighted median	5	0.0101934	0.0578595	0.860156	-0.103211	0.123598	1.01025	0.901936	1.13156	0.551445	3	0.907452	0.0125337	0.584612
23	ebi-a-GCST004692	Interleukin-10 levels	90274795	|| id:ebi-a-GCST004692	Inverse variance weighted	5	0.0201197	0.0485853	0.678793	-0.0751074	0.115347	1.02032	0.927644	1.12226	0.551445	3	0.907452	0.0125337	0.584612
24	ebi-a-GCST004692	Interleukin-10 levels	90274795	|| id:ebi-a-GCST004692	Simple mode	5	-0.0138501	0.0778424	0.86743	-0.166421	0.138721	0.986245	0.84669	1.1488	0.551445	3	0.907452	0.0125337	0.584612
25	ebi-a-GCST004692	Interleukin-10 levels	90274795	|| id:ebi-a-GCST004692	Weighted mode	5	0.00927399	0.0751576	0.907747	-0.138035	0.156583	1.00932	0.871068	1.16951	0.551445	3	0.907452	0.0125337	0.584612
26	ebi-a-GCST005647	Interleukin-10 levels	90274795	|| id:ebi-a-GCST005647	MR Egger	7	-0.0953427	0.0962304	0.367289	-0.283954	0.0932689	0.909061	0.752801	1.09776	0.496443	5	0.992253	0.0234025	0.197437
27	ebi-a-GCST005647	Interleukin-10 levels	90274795	|| id:ebi-a-GCST005647	Weighted median	7	0.0193327	0.0530644	0.715616	-0.0846735	0.123339	1.01952	0.918812	1.13127	0.496443	5	0.992253	0.0234025	0.197437
28	ebi-a-GCST005647	Interleukin-10 levels	90274795	|| id:ebi-a-GCST005647	Inverse variance weighted	7	0.0316619	0.0442149	0.473936	-0.0549994	0.118323	1.03217	0.946486	1.12561	0.496443	5	0.992253	0.0234025	0.197437
29	ebi-a-GCST005647	Interleukin-10 levels	90274795	|| id:ebi-a-GCST005647	Simple mode	7	0.0039776	0.0794227	0.961683	-0.151691	0.159646	1.00399	0.859254	1.1731	0.496443	5	0.992253	0.0234025	0.197437
30	ebi-a-GCST005647	Interleukin-10 levels	90274795	|| id:ebi-a-GCST005647	Weighted mode	7	0.0117399	0.0717545	0.875408	-0.128899	0.152379	1.01181	0.879063	1.1646	0.496443	5	0.992253	0.0234025	0.197437
31	ebi-a-GCST004692	Interleukin-17C levels	90274802	|| id:ebi-a-GCST004692	MR Egger	5	-0.135792	0.137671	0.396686	-0.405627	0.134044	0.873025	0.666559	1.14344	1.10728	3	0.775318	0.0319963	0.252662
32	ebi-a-GCST004692	Interleukin-17C levels	90274802	|| id:ebi-a-GCST004692	Weighted median	5	0.0306638	0.0634216	0.628747	-0.0936426	0.15497	1.03114	0.910608	1.16762	1.10728	3	0.775318	0.0319963	0.252662
33	ebi-a-GCST004692	Interleukin-17C levels	90274802	|| id:ebi-a-GCST004692	Inverse variance weighted	5	0.0433922	0.053494	0.417274	-0.0614561	0.14824	1.04435	0.940394	1.15979	1.10728	3	0.775318	0.0319963	0.252662
34	ebi-a-GCST004692	Interleukin-17C levels	90274802	|| id:ebi-a-GCST004692	Simple mode	5	0.00378623	0.0895017	0.968284	-0.171637	0.179209	1.00379	0.842285	1.19627	1.10728	3	0.775318	0.0319963	0.252662
35	ebi-a-GCST004692	Interleukin-17C levels	90274802	|| id:ebi-a-GCST004692	Weighted mode	5	0.0217697	0.0862987	0.813272	-0.147376	0.190915	1.02201	0.86297	1.21036	1.10728	3	0.775318	0.0319963	0.252662
36	ebi-a-GCST005647	Interleukin-17C levels	90274802	|| id:ebi-a-GCST005647	MR Egger	7	-0.116573	0.10548	0.319411	-0.323315	0.0901688	0.889965	0.723746	1.09436	0.655897	5	0.985301	0.0228263	0.246299
37	ebi-a-GCST005647	Interleukin-17C levels	90274802	|| id:ebi-a-GCST005647	Weighted median	7	0.00102185	0.0599943	0.986411	-0.116567	0.118611	1.00102	0.88997	1.12593	0.655897	5	0.985301	0.0228263	0.246299
38	ebi-a-GCST005647	Interleukin-17C levels	90274802	|| id:ebi-a-GCST005647	Inverse variance weighted	7	0.0064379	0.0484266	0.89424	-0.0884782	0.101354	1.00646	0.915323	1.10667	0.655897	5	0.985301	0.0228263	0.246299
39	ebi-a-GCST005647	Interleukin-17C levels	90274802	|| id:ebi-a-GCST005647	Simple mode	7	-0.0595322	0.100986	0.577027	-0.257465	0.1384	0.942205	0.773009	1.14843	0.655897	5	0.985301	0.0228263	0.246299
40	ebi-a-GCST005647	Interleukin-17C levels	90274802	|| id:ebi-a-GCST005647	Weighted mode	7	-0.00632216	0.0825329	0.941431	-0.168087	0.155442	0.993698	0.845281	1.16817	0.655897	5	0.985301	0.0228263	0.246299
41	ebi-a-GCST004692	Interleukin-5 levels	90274814	|| id:ebi-a-GCST004692	MR Egger	5	-0.132024	0.175102	0.505643	-0.475224	0.211177	0.87632	0.621746	1.23513	4.81409	3	0.185928	0.0240754	0.46458
42	ebi-a-GCST004692	Interleukin-5 levels	90274814	|| id:ebi-a-GCST004692	Weighted median	5	-0.00574989	0.0687466	0.933344	-0.140493	0.128994	0.994267	0.868929	1.13768	4.81409	3	0.185928	0.0240754	0.46458
43	ebi-a-GCST004692	Interleukin-5 levels	90274814	|| id:ebi-a-GCST004692	Inverse variance weighted	5	0.00270983	0.0657657	0.967133	-0.126191	0.131611	1.00271	0.881447	1.14066	4.81409	3	0.185928	0.0240754	0.46458
44	ebi-a-GCST004692	Interleukin-5 levels	90274814	|| id:ebi-a-GCST004692	Simple mode	5	-0.0214869	0.0956624	0.833289	-0.208985	0.166011	0.978742	0.811407	1.18059	4.81409	3	0.185928	0.0240754	0.46458
45	ebi-a-GCST004692	Interleukin-5 levels	90274814	|| id:ebi-a-GCST004692	Weighted mode	5	-0.012444	0.0782063	0.881287	-0.165728	0.14084	0.987633	0.847276	1.15124	4.81409	3	0.185928	0.0240754	0.46458
46	ebi-a-GCST005647	Interleukin-5 levels	90274814	|| id:ebi-a-GCST005647	MR Egger	7	-0.0824912	0.106534	0.473746	-0.291297	0.126315	0.92082	0.747294	1.13464	4.76149	5	0.445677	0.00806912	0.665812
47	ebi-a-GCST005647	Interleukin-5 levels	90274814	|| id:ebi-a-GCST005647	Weighted median	7	-0.0169592	0.0606144	0.77964	-0.135763	0.101845	0.983184	0.873049	1.10721	4.76149	5	0.445677	0.00806912	0.665812
48	ebi-a-GCST005647	Interleukin-5 levels	90274814	|| id:ebi-a-GCST005647	Inverse variance weighted	7	-0.0391089	0.0489703	0.424508	-0.135091	0.0568729	0.961646	0.873637	1.05852	4.76149	5	0.445677	0.00806912	0.665812
49	ebi-a-GCST005647	Interleukin-5 levels	90274814	|| id:ebi-a-GCST005647	Simple mode	7	-0.0302427	0.0934345	0.757166	-0.213374	0.152889	0.97021	0.807854	1.1652	4.76149	5	0.445677	0.00806912	0.665812
50	ebi-a-GCST005647	Interleukin-5 levels	90274814	|| id:ebi-a-GCST005647	Weighted mode	7	-0.0163487	0.0781767	0.84127	-0.169575	0.136878	0.983784	0.844023	1.14669	4.76149	5	0.445677	0.00806912	0.665812
51	ebi-a-GCST004692	Leukemia inhibitory factor receptor levels	90274820	|| id:ebi-a-GCST004692	MR Egger	5	-0.10682	0.137517	0.493913	-0.376353	0.162713	0.898687	0.68636	1.1767	1.71626	3	0.633325	-0.00376821	0.878279
52	ebi-a-GCST004692	Leukemia inhibitory factor receptor levels	90274820	|| id:ebi-a-GCST004692	Weighted median	5	-0.109696	0.0636007	0.0845714	-0.234353	0.0149617	0.896107	0.791082	1.01507	1.71626	3	0.633325	-0.00376821	0.878279
53	ebi-a-GCST004692	Leukemia inhibitory factor receptor levels	90274820	|| id:ebi-a-GCST004692	Inverse variance weighted	5	-0.128036	0.0519105	0.0136452	-0.22978	-0.0262911	0.879822	0.794708	0.974052	1.71626	3	0.633325	-0.00376821	0.878279
54	ebi-a-GCST004692	Leukemia inhibitory factor receptor levels	90274820	|| id:ebi-a-GCST004692	Simple mode	5	-0.115393	0.0943411	0.288407	-0.300301	0.069516	0.891016	0.740595	1.07199	1.71626	3	0.633325	-0.00376821	0.878279
55	ebi-a-GCST004692	Leukemia inhibitory factor receptor levels	90274820	|| id:ebi-a-GCST004692	Weighted mode	5	-0.0869643	0.0761723	0.317291	-0.236262	0.0623335	0.91671	0.789574	1.06432	1.71626	3	0.633325	-0.00376821	0.878279
56	ebi-a-GCST005647	Leukemia inhibitory factor receptor levels	90274820	|| id:ebi-a-GCST005647	MR Egger	7	-0.1489	0.121885	0.276295	-0.387795	0.0899953	0.861655	0.678551	1.09417	6.95543	5	0.223976	0.0170232	0.433906
57	ebi-a-GCST005647	Leukemia inhibitory factor receptor levels	90274820	|| id:ebi-a-GCST005647	Weighted median	7	-0.0786443	0.0620871	0.20527	-0.200335	0.0430463	0.924369	0.818457	1.04399	6.95543	5	0.223976	0.0170232	0.433906
58	ebi-a-GCST005647	Leukemia inhibitory factor receptor levels	90274820	|| id:ebi-a-GCST005647	Inverse variance weighted	7	-0.0565473	0.0540563	0.295524	-0.162498	0.0494032	0.945022	0.850018	1.05064	6.95543	5	0.223976	0.0170232	0.433906
59	ebi-a-GCST005647	Leukemia inhibitory factor receptor levels	90274820	|| id:ebi-a-GCST005647	Simple mode	7	-0.1213	0.0917471	0.234294	-0.301125	0.0585238	0.885768	0.739985	1.06027	6.95543	5	0.223976	0.0170232	0.433906
60	ebi-a-GCST005647	Leukemia inhibitory factor receptor levels	90274820	|| id:ebi-a-GCST005647	Weighted mode	7	-0.100384	0.0717904	0.211528	-0.241093	0.0403251	0.90449	0.785768	1.04115	6.95543	5	0.223976	0.0170232	0.433906
61	ebi-a-GCST004692	Neurturin levels	90274828	|| id:ebi-a-GCST004692	MR Egger	5	0.136864	0.137977	0.394353	-0.133572	0.407299	1.14667	0.874965	1.50275	1.7833	3	0.618577	-0.00710697	0.774555
62	ebi-a-GCST004692	Neurturin levels	90274828	|| id:ebi-a-GCST004692	Weighted median	5	0.0930685	0.0700651	0.184074	-0.0442591	0.230396	1.09754	0.956706	1.2591	1.7833	3	0.618577	-0.00710697	0.774555
63	ebi-a-GCST004692	Neurturin levels	90274828	|| id:ebi-a-GCST004692	Inverse variance weighted	5	0.0969939	0.0533466	0.0690358	-0.00756533	0.201553	1.10185	0.992463	1.2233	1.7833	3	0.618577	-0.00710697	0.774555
64	ebi-a-GCST004692	Neurturin levels	90274828	|| id:ebi-a-GCST004692	Simple mode	5	0.0784276	0.103658	0.491406	-0.124742	0.281597	1.08159	0.882725	1.32524	1.7833	3	0.618577	-0.00710697	0.774555
65	ebi-a-GCST004692	Neurturin levels	90274828	|| id:ebi-a-GCST004692	Weighted mode	5	0.142347	0.0867181	0.176041	-0.0276208	0.312314	1.15298	0.972757	1.36658	1.7833	3	0.618577	-0.00710697	0.774555
66	ebi-a-GCST005647	Neurturin levels	90274828	|| id:ebi-a-GCST005647	MR Egger	7	0.0583179	0.109952	0.61854	-0.157188	0.273824	1.06005	0.854544	1.31498	5.43572	5	0.365046	0.00348159	0.855194
67	ebi-a-GCST005647	Neurturin levels	90274828	|| id:ebi-a-GCST005647	Weighted median	7	0.0857641	0.0651409	0.187975	-0.0419121	0.21344	1.08955	0.958954	1.23793	5.43572	5	0.365046	0.00348159	0.855194
68	ebi-a-GCST005647	Neurturin levels	90274828	|| id:ebi-a-GCST005647	Inverse variance weighted	7	0.0770955	0.04832	0.110596	-0.0176117	0.171803	1.08015	0.982542	1.18744	5.43572	5	0.365046	0.00348159	0.855194
69	ebi-a-GCST005647	Neurturin levels	90274828	|| id:ebi-a-GCST005647	Simple mode	7	0.0853623	0.0963924	0.409933	-0.103567	0.274292	1.08911	0.901616	1.3156	5.43572	5	0.365046	0.00348159	0.855194
70	ebi-a-GCST005647	Neurturin levels	90274828	|| id:ebi-a-GCST005647	Weighted mode	7	0.133601	0.0904038	0.189928	-0.0435904	0.310792	1.14294	0.957346	1.36451	5.43572	5	0.365046	0.00348159	0.855194
71	ebi-a-GCST004692	Osteoprotegerin levels	90274830	|| id:ebi-a-GCST004692	MR Egger	5	0.0138454	0.216581	0.95305	-0.410654	0.438344	1.01394	0.663217	1.55014	9.81253	3	0.0202288	-0.0270299	0.503074
72	ebi-a-GCST004692	Osteoprotegerin levels	90274830	|| id:ebi-a-GCST004692	Weighted median	5	-0.12514	0.061278	0.0411344	-0.245245	-0.00503537	0.882373	0.782513	0.994977	9.81253	3	0.0202288	-0.0270299	0.503074
73	ebi-a-GCST004692	Osteoprotegerin levels	90274830	|| id:ebi-a-GCST004692	Inverse variance weighted	5	-0.13771	0.0792736	0.0823612	-0.293086	0.0176663	0.871351	0.745958	1.01782	9.81253	3	0.0202288	-0.0270299	0.503074
74	ebi-a-GCST004692	Osteoprotegerin levels	90274830	|| id:ebi-a-GCST004692	Simple mode	5	-0.0831522	0.084477	0.380686	-0.248727	0.0824226	0.920211	0.779793	1.08591	9.81253	3	0.0202288	-0.0270299	0.503074
75	ebi-a-GCST004692	Osteoprotegerin levels	90274830	|| id:ebi-a-GCST004692	Weighted mode	5	-0.10406	0.0705253	0.214109	-0.24229	0.0341692	0.901171	0.784829	1.03476	9.81253	3	0.0202288	-0.0270299	0.503074
76	ebi-a-GCST005647	Osteoprotegerin levels	90274830	|| id:ebi-a-GCST005647	MR Egger	7	-0.0511636	0.120871	0.689673	-0.28807	0.185743	0.950123	0.749709	1.20411	8.69045	5	0.122067	0.00880529	0.674638
77	ebi-a-GCST005647	Osteoprotegerin levels	90274830	|| id:ebi-a-GCST005647	Weighted median	7	-0.0306999	0.0610646	0.615144	-0.150386	0.0889867	0.969767	0.860375	1.09307	8.69045	5	0.122067	0.00880529	0.674638
78	ebi-a-GCST005647	Osteoprotegerin levels	90274830	|| id:ebi-a-GCST005647	Inverse variance weighted	7	-0.00330616	0.0515382	0.948851	-0.104321	0.0977088	0.996699	0.900936	1.10264	8.69045	5	0.122067	0.00880529	0.674638
79	ebi-a-GCST005647	Osteoprotegerin levels	90274830	|| id:ebi-a-GCST005647	Simple mode	7	0.0985587	0.105283	0.385336	-0.107796	0.304913	1.10358	0.897811	1.35651	8.69045	5	0.122067	0.00880529	0.674638
80	ebi-a-GCST005647	Osteoprotegerin levels	90274830	|| id:ebi-a-GCST005647	Weighted mode	7	-0.0924532	0.0724957	0.249357	-0.234545	0.0496385	0.911692	0.790931	1.05089	8.69045	5	0.122067	0.00880529	0.674638
81	ebi-a-GCST004692	Oncostatin-M levels	90274831	|| id:ebi-a-GCST004692	MR Egger	5	0.0488257	0.125008	0.72219	-0.196189	0.293841	1.05004	0.821857	1.34157	1.36418	3	0.713953	-0.0276588	0.271138
82	ebi-a-GCST004692	Oncostatin-M levels	90274831	|| id:ebi-a-GCST004692	Weighted median	5	-0.103118	0.0605054	0.0883305	-0.221708	0.015473	0.902021	0.801149	1.01559	1.36418	3	0.713953	-0.0276588	0.271138
83	ebi-a-GCST004692	Oncostatin-M levels	90274831	|| id:ebi-a-GCST004692	Inverse variance weighted	5	-0.106098	0.0486635	0.0292396	-0.201479	-0.0107177	0.899336	0.817521	0.98934	1.36418	3	0.713953	-0.0276588	0.271138
84	ebi-a-GCST004692	Oncostatin-M levels	90274831	|| id:ebi-a-GCST004692	Simple mode	5	-0.13869	0.0855457	0.180285	-0.306359	0.0289799	0.870498	0.736122	1.0294	1.36418	3	0.713953	-0.0276588	0.271138
85	ebi-a-GCST004692	Oncostatin-M levels	90274831	|| id:ebi-a-GCST004692	Weighted mode	5	-0.0984107	0.0746224	0.257677	-0.244671	0.0478493	0.906277	0.782962	1.04901	1.36418	3	0.713953	-0.0276588	0.271138
86	ebi-a-GCST005647	Oncostatin-M levels	90274831	|| id:ebi-a-GCST005647	MR Egger	7	-0.0792048	0.118649	0.533986	-0.311757	0.153347	0.923851	0.73216	1.16573	7.55087	5	0.182787	0.00781874	0.704007
87	ebi-a-GCST005647	Oncostatin-M levels	90274831	|| id:ebi-a-GCST005647	Weighted median	7	-0.0855771	0.0593825	0.149552	-0.201967	0.0308126	0.917982	0.817122	1.03129	7.55087	5	0.182787	0.00781874	0.704007
88	ebi-a-GCST005647	Oncostatin-M levels	90274831	|| id:ebi-a-GCST005647	Inverse variance weighted	7	-0.0367886	0.0505267	0.466551	-0.135821	0.0622437	0.96388	0.872999	1.06422	7.55087	5	0.182787	0.00781874	0.704007
89	ebi-a-GCST005647	Oncostatin-M levels	90274831	|| id:ebi-a-GCST005647	Simple mode	7	-0.124853	0.0864958	0.199	-0.294384	0.044679	0.882627	0.74499	1.04569	7.55087	5	0.182787	0.00781874	0.704007
90	ebi-a-GCST005647	Oncostatin-M levels	90274831	|| id:ebi-a-GCST005647	Weighted mode	7	-0.108233	0.0684725	0.165034	-0.242439	0.025973	0.897418	0.784712	1.02631	7.55087	5	0.182787	0.00781874	0.704007
91	ebi-a-GCST004692	SIR2-like protein 2 levels	90274834	|| id:ebi-a-GCST004692	MR Egger	5	-0.0320854	0.139097	0.832407	-0.304715	0.240544	0.968424	0.737334	1.27194	3.74262	3	0.290631	0.00807372	0.747689
92	ebi-a-GCST004692	SIR2-like protein 2 levels	90274834	|| id:ebi-a-GCST004692	Weighted median	5	0.0194596	0.0636341	0.759754	-0.105263	0.144182	1.01965	0.900088	1.15509	3.74262	3	0.290631	0.00807372	0.747689
93	ebi-a-GCST004692	SIR2-like protein 2 levels	90274834	|| id:ebi-a-GCST004692	Inverse variance weighted	5	0.0131059	0.0484106	0.786603	-0.0817789	0.107991	1.01319	0.921476	1.11404	3.74262	3	0.290631	0.00807372	0.747689
94	ebi-a-GCST004692	SIR2-like protein 2 levels	90274834	|| id:ebi-a-GCST004692	Simple mode	5	0.0186119	0.0886329	0.843938	-0.155108	0.192332	1.01879	0.856322	1.21207	3.74262	3	0.290631	0.00807372	0.747689
95	ebi-a-GCST004692	SIR2-like protein 2 levels	90274834	|| id:ebi-a-GCST004692	Weighted mode	5	0.0197666	0.078173	0.812841	-0.133452	0.172986	1.01996	0.875069	1.18885	3.74262	3	0.290631	0.00807372	0.747689
96	ebi-a-GCST005647	SIR2-like protein 2 levels	90274834	|| id:ebi-a-GCST005647	MR Egger	7	-0.119824	0.0959679	0.267092	-0.307921	0.0682731	0.887077	0.734973	1.07066	2.07021	5	0.839348	0.030573	0.109525
97	ebi-a-GCST005647	SIR2-like protein 2 levels	90274834	|| id:ebi-a-GCST005647	Weighted median	7	0.0242619	0.0590547	0.681191	-0.0914852	0.140009	1.02456	0.912575	1.15028	2.07021	5	0.839348	0.030573	0.109525
98	ebi-a-GCST005647	SIR2-like protein 2 levels	90274834	|| id:ebi-a-GCST005647	Inverse variance weighted	7	0.0459079	0.0440555	0.29739	-0.040441	0.132257	1.04698	0.960366	1.1414	2.07021	5	0.839348	0.030573	0.109525
99	ebi-a-GCST005647	SIR2-like protein 2 levels	90274834	|| id:ebi-a-GCST005647	Simple mode	7	0.0159586	0.0924748	0.868661	-0.165292	0.197209	1.01609	0.847646	1.218	2.07021	5	0.839348	0.030573	0.109525
100	ebi-a-GCST005647	SIR2-like protein 2 levels	90274834	|| id:ebi-a-GCST005647	Weighted mode	7	0.0172617	0.0721218	0.818808	-0.124097	0.15862	1.01741	0.883294	1.17189	2.07021	5	0.839348	0.030573	0.109525
101	ebi-a-GCST004692	TNF-beta levels	90274840	|| id:ebi-a-GCST004692	MR Egger	5	-0.217123	0.13814	0.214048	-0.487877	0.0536312	0.804831	0.613928	1.0551	2.09891	3	0.552133	0.0248025	0.354737
102	ebi-a-GCST004692	TNF-beta levels	90274840	|| id:ebi-a-GCST004692	Weighted median	5	-0.108407	0.0662687	0.101867	-0.238293	0.0214799	0.897263	0.787971	1.02171	2.09891	3	0.552133	0.0248025	0.354737
103	ebi-a-GCST004692	TNF-beta levels	90274840	|| id:ebi-a-GCST004692	Inverse variance weighted	5	-0.0782614	0.0539258	0.146702	-0.183956	0.0274332	0.924723	0.831972	1.02781	2.09891	3	0.552133	0.0248025	0.354737
104	ebi-a-GCST004692	TNF-beta levels	90274840	|| id:ebi-a-GCST004692	Simple mode	5	-0.114914	0.10617	0.33998	-0.323006	0.0931784	0.891443	0.723969	1.09766	2.09891	3	0.552133	0.0248025	0.354737
105	ebi-a-GCST004692	TNF-beta levels	90274840	|| id:ebi-a-GCST004692	Weighted mode	5	-0.148076	0.0901447	0.175801	-0.324759	0.0286077	0.862366	0.722701	1.02902	2.09891	3	0.552133	0.0248025	0.354737
106	ebi-a-GCST005647	TNF-beta levels	90274840	|| id:ebi-a-GCST005647	MR Egger	7	-0.112539	0.177286	0.553474	-0.460019	0.234941	0.893563	0.631272	1.26483	13.8711	5	0.0164493	0.0220356	0.485804
107	ebi-a-GCST005647	TNF-beta levels	90274840	|| id:ebi-a-GCST005647	Weighted median	7	-0.0758348	0.0728257	0.297727	-0.218573	0.0669035	0.926969	0.803665	1.06919	13.8711	5	0.0164493	0.0220356	0.485804
108	ebi-a-GCST005647	TNF-beta levels	90274840	|| id:ebi-a-GCST005647	Inverse variance weighted	7	0.00586585	0.0785595	0.940479	-0.148111	0.159842	1.00588	0.862336	1.17333	13.8711	5	0.0164493	0.0220356	0.485804
109	ebi-a-GCST005647	TNF-beta levels	90274840	|| id:ebi-a-GCST005647	Simple mode	7	-0.0788841	0.125619	0.553162	-0.325097	0.167329	0.924147	0.722457	1.18214	13.8711	5	0.0164493	0.0220356	0.485804
110	ebi-a-GCST005647	TNF-beta levels	90274840	|| id:ebi-a-GCST005647	Weighted mode	7	-0.107345	0.0766813	0.211073	-0.25764	0.0429501	0.898216	0.772873	1.04389	13.8711	5	0.0164493	0.0220356	0.485804
111	ebi-a-GCST004692	Tumor necrosis factor ligand superfamily member 12 levels	90274846	|| id:ebi-a-GCST004692	MR Egger	5	-0.228618	0.127268	0.170303	-0.478064	0.0208284	0.795633	0.619983	1.02105	3.12803	3	0.372304	0.0448171	0.121753
112	ebi-a-GCST004692	Tumor necrosis factor ligand superfamily member 12 levels	90274846	|| id:ebi-a-GCST004692	Weighted median	5	-0.0156326	0.0624403	0.802308	-0.138016	0.10675	0.984489	0.871085	1.11266	3.12803	3	0.372304	0.0448171	0.121753
113	ebi-a-GCST004692	Tumor necrosis factor ligand superfamily member 12 levels	90274846	|| id:ebi-a-GCST004692	Inverse variance weighted	5	0.0227868	0.0675555	0.735887	-0.109622	0.155196	1.02305	0.896173	1.16789	3.12803	3	0.372304	0.0448171	0.121753
114	ebi-a-GCST004692	Tumor necrosis factor ligand superfamily member 12 levels	90274846	|| id:ebi-a-GCST004692	Simple mode	5	-0.00383696	0.0818099	0.96484	-0.164184	0.15651	0.99617	0.848586	1.16942	3.12803	3	0.372304	0.0448171	0.121753
115	ebi-a-GCST004692	Tumor necrosis factor ligand superfamily member 12 levels	90274846	|| id:ebi-a-GCST004692	Weighted mode	5	-0.0206523	0.0660056	0.770001	-0.150023	0.108719	0.979559	0.860688	1.11485	3.12803	3	0.372304	0.0448171	0.121753
116	ebi-a-GCST005647	Tumor necrosis factor ligand superfamily member 12 levels	90274846	|| id:ebi-a-GCST005647	MR Egger	7	-0.171494	0.0998884	0.146655	-0.367276	0.0242871	0.842405	0.692619	1.02458	5.46316	5	0.362002	0.0421879	0.049326
117	ebi-a-GCST005647	Tumor necrosis factor ligand superfamily member 12 levels	90274846	|| id:ebi-a-GCST005647	Weighted median	7	-0.0179829	0.0605187	0.766355	-0.136599	0.100634	0.982178	0.87232	1.10587	5.46316	5	0.362002	0.0421879	0.049326
118	ebi-a-GCST005647	Tumor necrosis factor ligand superfamily member 12 levels	90274846	|| id:ebi-a-GCST005647	Inverse variance weighted	7	0.0578478	0.0636955	0.363777	-0.0669955	0.182691	1.05955	0.935199	1.20044	5.46316	5	0.362002	0.0421879	0.049326
119	ebi-a-GCST005647	Tumor necrosis factor ligand superfamily member 12 levels	90274846	|| id:ebi-a-GCST005647	Simple mode	7	-0.0200548	0.0979944	0.84461	-0.212124	0.172014	0.980145	0.808865	1.18769	5.46316	5	0.362002	0.0421879	0.049326
120	ebi-a-GCST005647	Tumor necrosis factor ligand superfamily member 12 levels	90274846	|| id:ebi-a-GCST005647	Weighted mode	7	-0.0287194	0.0657723	0.677642	-0.157633	0.100194	0.971689	0.854163	1.10539	5.46316	5	0.362002	0.0421879	0.049326

## Sheet: S6
SNP details for the forward Mendelian randomization validation group (p<5e-8)
	SNP	effect_allele.exposure	other_allele.exposure	effect_allele.outcome	other_allele.outcome	beta.exposure	beta.outcome	eaf.exposure	eaf.outcome	remove	palindromic	ambiguous	id.outcome	chr	pos	se.outcome	samplesize.outcome	pval.outcome	outcome	originalname.outcome	outcome.deprecated	mr_keep.outcome	data_source.outcome	proxy.outcome	target_snp.outcome	proxy_snp.outcome	target_a1.outcome	target_a2.outcome	proxy_a1.outcome	proxy_a2.outcome	V1	se.exposure	pval.exposure	samplesize.exposure	exposure	mr_keep.exposure	pval_origin.exposure	id.exposure	data_source.exposure	group	action	mr_keep	units.outcome	units.exposure	rsq.exposure	effective_n.exposure	rsq.outcome	effective_n.outcome	steiger_dir
1	rs112665079	T	C	T	C	0.8932	0.0838	0.051	NA	FALSE	FALSE	FALSE	ebi-a-GCST004692	20	43120683	0.0403	36052	0.0376097	Amyotrophic lateral sclerosis || id:ebi-a-GCST004692	Amyotrophic lateral sclerosis	Amyotrophic lateral sclerosis || ||	TRUE	igd	NA	NA	NA	NA	NA	NA	NA	82	0.026	1e-200	14720	90274759	TRUE	reported	4Txn9p	90274759	90274759	2	TRUE	NA	NA	0.074234	14720	0.000119928	36052	TRUE
2	rs138960575	A	G	A	G	0.2878	-0.1721	0.9797	NA	FALSE	FALSE	FALSE	ebi-a-GCST004692	20	43240490	0.0737	36052	0.0195601	Amyotrophic lateral sclerosis || id:ebi-a-GCST004692	Amyotrophic lateral sclerosis	Amyotrophic lateral sclerosis || ||	TRUE	igd	NA	NA	NA	NA	NA	NA	NA	200	0.0507	1.37e-08	14288	90274759	TRUE	reported	4Txn9p	90274759	90274759	2	TRUE	NA	NA	0.00225049	14288	0.000151236	36052	TRUE
3	rs6017383	T	C	T	C	-0.1776	0.0041	0.7625	NA	FALSE	FALSE	FALSE	ebi-a-GCST004692	20	43298501	0.0218	36052	0.8528	Amyotrophic lateral sclerosis || id:ebi-a-GCST004692	Amyotrophic lateral sclerosis	Amyotrophic lateral sclerosis || ||	TRUE	igd	NA	NA	NA	NA	NA	NA	NA	301	0.0141	2.23e-36	14715	90274759	TRUE	reported	4Txn9p	90274759	90274759	2	TRUE	NA	NA	0.0106681	14715	9.81e-07	36052	TRUE
4	rs80212763	T	C	T	C	0.9687	-0.085	0.0189	NA	FALSE	FALSE	FALSE	ebi-a-GCST004692	20	43223930	0.072	36052	0.2375	Amyotrophic lateral sclerosis || id:ebi-a-GCST004692	Amyotrophic lateral sclerosis	Amyotrophic lateral sclerosis || ||	TRUE	igd	NA	NA	NA	NA	NA	NA	NA	180	0.0448	1.1e-103	14249	90274759	TRUE	reported	4Txn9p	90274759	90274759	2	TRUE	NA	NA	0.0317743	14249	3.87e-05	36052	TRUE
5	rs112046281	A	G	A	G	-0.6167	0.1594	0.0161	NA	FALSE	FALSE	FALSE	ebi-a-GCST004692	6	31769614	0.0701	36052	0.02298	Amyotrophic lateral sclerosis || id:ebi-a-GCST004692	Amyotrophic lateral sclerosis	Amyotrophic lateral sclerosis || ||	TRUE	igd	NA	NA	NA	NA	NA	NA	NA	6054	0.0536	1.24e-30	11792	90274840	TRUE	reported	cr9BAQ	90274840	90274840	2	TRUE	NA	NA	0.0111034	11792	0.000143408	36052	TRUE
6	rs151218088	T	C	T	C	-0.6677	-0.1537	0.014	NA	FALSE	FALSE	FALSE	ebi-a-GCST004692	6	30540762	0.1026	36052	0.1342	Amyotrophic lateral sclerosis || id:ebi-a-GCST004692	Amyotrophic lateral sclerosis	Amyotrophic lateral sclerosis || ||	TRUE	igd	NA	NA	NA	NA	NA	NA	NA	883	0.0648	6.76e-25	10857	90274840	TRUE	reported	cr9BAQ	90274840	90274840	2	TRUE	NA	NA	0.00968625	10857	6.22e-05	36052	TRUE
7	rs200934644	T	TCAAA	T	TCAAA	0.3646	0.089	0.9523	NA	FALSE	FALSE	FALSE	ebi-a-GCST004692	6	31063595	0.0573	36052	0.1206	Amyotrophic lateral sclerosis || id:ebi-a-GCST004692	Amyotrophic lateral sclerosis	Amyotrophic lateral sclerosis || ||	TRUE	igd	NA	NA	NA	NA	NA	NA	NA	1627	0.0444	2.18e-16	7943	90274840	TRUE	reported	cr9BAQ	90274840	90274840	2	TRUE	NA	NA	0.00842015	7943	6.69e-05	36052	TRUE
8	rs2074475	T	C	T	C	0.2308	-0.0595	0.9618	NA	FALSE	FALSE	FALSE	ebi-a-GCST004692	6	30137890	0.0631	36052	0.346	Amyotrophic lateral sclerosis || id:ebi-a-GCST004692	Amyotrophic lateral sclerosis	Amyotrophic lateral sclerosis || ||	TRUE	igd	NA	NA	NA	NA	NA	NA	NA	777	0.0421	4.2e-08	11792	90274840	TRUE	reported	cr9BAQ	90274840	90274840	2	TRUE	NA	NA	0.00254266	11792	2.47e-05	36052	TRUE
9	rs2364485	A	C	A	C	0.1759	-0.0371	0.1645	NA	FALSE	FALSE	FALSE	ebi-a-GCST004692	12	6514963	0.0246	36052	0.1321	Amyotrophic lateral sclerosis || id:ebi-a-GCST004692	Amyotrophic lateral sclerosis	Amyotrophic lateral sclerosis || ||	TRUE	igd	NA	NA	NA	NA	NA	NA	NA	7026	0.0189	1.32e-20	11344	90274840	TRUE	reported	cr9BAQ	90274840	90274840	2	TRUE	NA	NA	0.00757904	11344	6.31e-05	36052	TRUE
10	rs2523887	A	G	A	G	0.2057	0.0086	0.7362	NA	FALSE	FALSE	FALSE	ebi-a-GCST004692	6	31040725	0.0198	36052	0.6623	Amyotrophic lateral sclerosis || id:ebi-a-GCST004692	Amyotrophic lateral sclerosis	Amyotrophic lateral sclerosis || ||	TRUE	igd	NA	NA	NA	NA	NA	NA	NA	1483	0.0148	6.45e-44	11792	90274840	TRUE	reported	cr9BAQ	90274840	90274840	2	TRUE	NA	NA	0.0161203	11792	5.23e-06	36052	TRUE
11	rs28366157	A	G	A	G	-0.217	0.0185	0.9465	NA	FALSE	FALSE	FALSE	ebi-a-GCST004692	6	31672242	0.0405	36052	0.6475	Amyotrophic lateral sclerosis || id:ebi-a-GCST004692	Amyotrophic lateral sclerosis	Amyotrophic lateral sclerosis || ||	TRUE	igd	NA	NA	NA	NA	NA	NA	NA	6013	0.0313	4.12e-12	10918	90274840	TRUE	reported	cr9BAQ	90274840	90274840	2	TRUE	NA	NA	0.00438388	10918	5.79e-06	36052	TRUE
12	rs2894233	A	G	A	G	-0.3651	-0.1035	0.9705	NA	FALSE	FALSE	FALSE	ebi-a-GCST004692	6	32011678	0.0592	36052	0.0804804	Amyotrophic lateral sclerosis || id:ebi-a-GCST004692	Amyotrophic lateral sclerosis	Amyotrophic lateral sclerosis || ||	TRUE	igd	NA	NA	NA	NA	NA	NA	NA	6241	0.0539	1.26e-11	8974	90274840	TRUE	reported	cr9BAQ	90274840	90274840	2	TRUE	NA	NA	0.00508794	8974	8.48e-05	36052	TRUE
13	rs2904602	A	G	A	G	-0.625	0.0026	0.1165	NA	FALSE	FALSE	FALSE	ebi-a-GCST004692	6	31451847	0.0278	36052	0.926	Amyotrophic lateral sclerosis || id:ebi-a-GCST004692	Amyotrophic lateral sclerosis	Amyotrophic lateral sclerosis || ||	TRUE	igd	NA	NA	NA	NA	NA	NA	NA	5384	0.0196	1e-200	11791	90274840	TRUE	reported	cr9BAQ	90274840	90274840	2	TRUE	NA	NA	0.0794036	11791	2.43e-07	36052	TRUE
14	rs3132518	C	G	C	G	0.1071	0.0413	0.4015	NA	FALSE	TRUE	TRUE	ebi-a-GCST004692	6	31140169	0.0181	36052	0.0221401	Amyotrophic lateral sclerosis || id:ebi-a-GCST004692	Amyotrophic lateral sclerosis	Amyotrophic lateral sclerosis || ||	TRUE	igd	NA	NA	NA	NA	NA	NA	NA	1974	0.0133	8.1e-16	11791	90274840	TRUE	reported	cr9BAQ	90274840	90274840	2	FALSE	NA	NA	0.00547037	11791	0.000144403	36052	TRUE
15	rs62408379	T	C	T	C	-0.1523	-0.0137	0.0771	NA	FALSE	FALSE	FALSE	ebi-a-GCST004692	6	28722076	0.0329	36052	0.6767	Amyotrophic lateral sclerosis || id:ebi-a-GCST004692	Amyotrophic lateral sclerosis	Amyotrophic lateral sclerosis || ||	TRUE	igd	NA	NA	NA	NA	NA	NA	NA	19	0.0248	8.19e-10	11774	90274840	TRUE	reported	cr9BAQ	90274840	90274840	2	TRUE	NA	NA	0.00319343	11774	4.81e-06	36052	TRUE
16	rs7310615	C	G	C	G	0.1356	-0.0467	0.4758	NA	FALSE	TRUE	TRUE	ebi-a-GCST004692	12	111865049	0.0177	36052	0.00835103	Amyotrophic lateral sclerosis || id:ebi-a-GCST004692	Amyotrophic lateral sclerosis	Amyotrophic lateral sclerosis || ||	TRUE	igd	NA	NA	NA	NA	NA	NA	NA	7040	0.0134	4.53e-24	11344	90274840	TRUE	reported	cr9BAQ	90274840	90274840	2	FALSE	NA	NA	0.00894781	11344	0.000193063	36052	TRUE
17	rs73390248	T	C	T	C	-0.2269	0.0528	0.1027	NA	FALSE	FALSE	FALSE	ebi-a-GCST004692	6	31329834	0.0294	36052	0.0725404	Amyotrophic lateral sclerosis || id:ebi-a-GCST004692	Amyotrophic lateral sclerosis	Amyotrophic lateral sclerosis || ||	TRUE	igd	NA	NA	NA	NA	NA	NA	NA	4327	0.0223	2.57e-24	11792	90274840	TRUE	reported	cr9BAQ	90274840	90274840	2	TRUE	NA	NA	0.0087046	11792	8.95e-05	36052	TRUE
18	rs2511241	T	C	T	C	0.177	-0.0055	0.9163	NA	FALSE	FALSE	FALSE	ebi-a-GCST004692	11	72945341	0.037	36052	0.8822	Amyotrophic lateral sclerosis || id:ebi-a-GCST004692	Amyotrophic lateral sclerosis	Amyotrophic lateral sclerosis || ||	TRUE	igd	NA	NA	NA	NA	NA	NA	NA	4	0.0236	6.38e-14	13668	90274831	TRUE	reported	jYpwGU	90274831	90274831	2	TRUE	NA	NA	0.00409918	13668	6.13e-07	36052	TRUE
19	rs3859189	A	G	A	G	0.1101	-0.011	0.5367	NA	FALSE	FALSE	FALSE	ebi-a-GCST004692	17	38137033	0.0177	36052	0.535499	Amyotrophic lateral sclerosis || id:ebi-a-GCST004692	Amyotrophic lateral sclerosis	Amyotrophic lateral sclerosis || ||	TRUE	igd	NA	NA	NA	NA	NA	NA	NA	121	0.0117	4.95e-21	14729	90274831	TRUE	reported	jYpwGU	90274831	90274831	2	TRUE	NA	NA	0.00597703	14729	1.07e-05	36052	TRUE
20	rs653178	T	C	T	C	-0.0728	0.0464	0.5224	NA	FALSE	FALSE	FALSE	ebi-a-GCST004692	12	112007756	0.0177	36052	0.00879691	Amyotrophic lateral sclerosis || id:ebi-a-GCST004692	Amyotrophic lateral sclerosis	Amyotrophic lateral sclerosis || ||	TRUE	igd	NA	NA	NA	NA	NA	NA	NA	7	0.0132	3.48e-08	11785	90274831	TRUE	reported	jYpwGU	90274831	90274831	2	TRUE	NA	NA	0.00257478	11785	0.000190591	36052	TRUE
21	rs9264931	T	C	T	C	-0.1048	-0.0202	0.8812	NA	FALSE	FALSE	FALSE	ebi-a-GCST004692	6	31274196	0.0275	36052	0.4626	Amyotrophic lateral sclerosis || id:ebi-a-GCST004692	Amyotrophic lateral sclerosis	Amyotrophic lateral sclerosis || ||	TRUE	igd	NA	NA	NA	NA	NA	NA	NA	1	0.0191	4.09e-08	14736	90274831	TRUE	reported	jYpwGU	90274831	90274831	2	TRUE	NA	NA	0.00203915	14736	1.5e-05	36052	TRUE
22	rs112635299	T	G	T	G	0.2618	-0.0723	0.0205	NA	FALSE	FALSE	FALSE	ebi-a-GCST004692	14	94838142	0.0742	36052	0.3298	Amyotrophic lateral sclerosis || id:ebi-a-GCST004692	Amyotrophic lateral sclerosis	Amyotrophic lateral sclerosis || ||	TRUE	igd	NA	NA	NA	NA	NA	NA	NA	281	0.0433	1.48e-09	14733	90274830	TRUE	reported	l69Bh4	90274830	90274830	2	TRUE	NA	NA	0.00247545	14733	2.63e-05	36052	TRUE
23	rs114165349	C	G	C	G	-0.1948	-0.0805	0.0337	NA	FALSE	TRUE	TRUE	ebi-a-GCST004692	1	27021913	0.0584	36052	0.1677	Amyotrophic lateral sclerosis || id:ebi-a-GCST004692	Amyotrophic lateral sclerosis	Amyotrophic lateral sclerosis || ||	TRUE	igd	NA	NA	NA	NA	NA	NA	NA	1	0.034	1.01e-08	14727	90274830	TRUE	reported	l69Bh4	90274830	90274830	2	FALSE	NA	NA	0.00222432	14727	5.27e-05	36052	TRUE
24	rs1493936	T	C	T	C	-0.258	0.1652	0.0224	NA	FALSE	FALSE	FALSE	ebi-a-GCST004692	8	119777640	0.0878	36052	0.06008	Amyotrophic lateral sclerosis || id:ebi-a-GCST004692	Amyotrophic lateral sclerosis	Amyotrophic lateral sclerosis || ||	TRUE	igd	NA	NA	NA	NA	NA	NA	NA	10	0.046	2.04e-08	14246	90274830	TRUE	reported	l69Bh4	90274830	90274830	2	TRUE	NA	NA	0.0022036	14246	9.82e-05	36052	TRUE
25	rs2247769	T	C	T	C	-0.1705	0.0186	0.5577	NA	FALSE	FALSE	FALSE	ebi-a-GCST004692	8	120081031	0.0176	36052	0.2925	Amyotrophic lateral sclerosis || id:ebi-a-GCST004692	Amyotrophic lateral sclerosis	Amyotrophic lateral sclerosis || ||	TRUE	igd	NA	NA	NA	NA	NA	NA	NA	57	0.0114	1.42e-50	14285	90274830	TRUE	reported	l69Bh4	90274830	90274830	2	TRUE	NA	NA	0.0154195	14285	3.1e-05	36052	TRUE
26	rs58792577	T	C	T	C	-0.0665	0.0267	0.6822	NA	FALSE	FALSE	FALSE	ebi-a-GCST004692	8	119805839	0.0191	36052	0.1616	Amyotrophic lateral sclerosis || id:ebi-a-GCST004692	Amyotrophic lateral sclerosis	Amyotrophic lateral sclerosis || ||	TRUE	igd	NA	NA	NA	NA	NA	NA	NA	11	0.0119	2.29e-08	14724	90274830	TRUE	reported	l69Bh4	90274830	90274830	2	TRUE	NA	NA	0.00211671	14724	5.42e-05	36052	TRUE
27	rs704	A	G	A	G	-0.1404	0.0285	0.4726	NA	FALSE	FALSE	FALSE	ebi-a-GCST004692	17	26694861	0.0178	36052	0.1103	Amyotrophic lateral sclerosis || id:ebi-a-GCST004692	Amyotrophic lateral sclerosis	Amyotrophic lateral sclerosis || ||	TRUE	igd	NA	NA	NA	NA	NA	NA	NA	344	0.0111	1.14e-36	14733	90274830	TRUE	reported	l69Bh4	90274830	90274830	2	TRUE	NA	NA	0.010744	14733	7.11e-05	36052	TRUE
28	rs10901252	C	G	C	G	0.2068	-0.095	0.0963	NA	FALSE	TRUE	TRUE	ebi-a-GCST004692	9	136128000	0.0339	36052	0.00506104	Amyotrophic lateral sclerosis || id:ebi-a-GCST004692	Amyotrophic lateral sclerosis	Amyotrophic lateral sclerosis || ||	TRUE	igd	NA	NA	NA	NA	NA	NA	NA	132	0.0213	2.76e-22	11779	90274820	TRUE	reported	LNwUqU	90274820	90274820	2	FALSE	NA	NA	0.00794045	11779	0.000217795	36052	TRUE
29	rs2289779	T	G	T	G	0.0788	0.0033	0.5419	NA	FALSE	FALSE	FALSE	ebi-a-GCST004692	5	38527228	0.0179	36052	0.8558	Amyotrophic lateral sclerosis || id:ebi-a-GCST004692	Amyotrophic lateral sclerosis	Amyotrophic lateral sclerosis || ||	TRUE	igd	NA	NA	NA	NA	NA	NA	NA	1	0.0134	4.09e-09	11336	90274820	TRUE	reported	LNwUqU	90274820	90274820	2	TRUE	NA	NA	0.00304184	11336	9.43e-07	36052	TRUE
30	rs114882743	A	T	A	T	-0.3259	-0.0496	0.9804	NA	FALSE	TRUE	TRUE	ebi-a-GCST004692	1	176930254	0.0794	36052	0.5322	Amyotrophic lateral sclerosis || id:ebi-a-GCST004692	Amyotrophic lateral sclerosis	Amyotrophic lateral sclerosis || ||	TRUE	igd	NA	NA	NA	NA	NA	NA	NA	2	0.0548	2.73e-09	11345	90274802	TRUE	reported	nME2R9	90274802	90274802	2	FALSE	NA	NA	0.00310833	11345	1.08e-05	36052	TRUE
31	rs17700884	T	G	T	G	-0.105	-0.0213	0.3783	NA	FALSE	FALSE	FALSE	ebi-a-GCST004692	16	88684495	0.0187	36052	0.2552	Amyotrophic lateral sclerosis || id:ebi-a-GCST004692	Amyotrophic lateral sclerosis	Amyotrophic lateral sclerosis || ||	TRUE	igd	NA	NA	NA	NA	NA	NA	NA	25	0.0136	1.16e-14	11775	90274802	TRUE	reported	nME2R9	90274802	90274802	2	TRUE	NA	NA	0.00503756	11775	3.6e-05	36052	TRUE
32	rs10831650	A	G	A	G	0.0692	-0.0016	0.3558	NA	FALSE	FALSE	FALSE	ebi-a-GCST004692	11	11644391	0.0186	36052	0.9311	Amyotrophic lateral sclerosis || id:ebi-a-GCST004692	Amyotrophic lateral sclerosis	Amyotrophic lateral sclerosis || ||	TRUE	igd	NA	NA	NA	NA	NA	NA	NA	125	0.0125	3.09e-08	14288	90274846	TRUE	reported	OpTQk7	90274846	90274846	2	TRUE	NA	NA	0.00214067	14288	2.05e-07	36052	TRUE
33	rs13107325	T	C	T	C	0.2027	0.0501	0.0696	NA	FALSE	FALSE	FALSE	ebi-a-GCST004692	4	103188709	0.0357	36052	0.1604	Amyotrophic lateral sclerosis || id:ebi-a-GCST004692	Amyotrophic lateral sclerosis	Amyotrophic lateral sclerosis || ||	TRUE	igd	NA	NA	NA	NA	NA	NA	NA	79	0.0236	8.77e-18	14733	90274846	TRUE	reported	OpTQk7	90274846	90274846	2	TRUE	NA	NA	0.0049829	14733	5.46e-05	36052	TRUE
34	rs34790908	T	C	T	C	0.211	0.0509	0.2563	NA	FALSE	FALSE	FALSE	ebi-a-GCST004692	17	7451110	0.0199	36052	0.01064	Amyotrophic lateral sclerosis || id:ebi-a-GCST004692	Amyotrophic lateral sclerosis	Amyotrophic lateral sclerosis || ||	TRUE	igd	NA	NA	NA	NA	NA	NA	NA	375	0.0129	3.9e-60	14732	90274846	TRUE	reported	OpTQk7	90274846	90274846	2	TRUE	NA	NA	0.0178388	14732	0.000181445	36052	TRUE
35	rs62059693	T	C	T	C	0.1069	-0.0175	0.8557	NA	FALSE	FALSE	FALSE	ebi-a-GCST004692	17	7723513	0.025	36052	0.4848	Amyotrophic lateral sclerosis || id:ebi-a-GCST004692	Amyotrophic lateral sclerosis	Amyotrophic lateral sclerosis || ||	TRUE	igd	NA	NA	NA	NA	NA	NA	NA	545	0.0173	6.44e-10	14288	90274846	TRUE	reported	OpTQk7	90274846	90274846	2	TRUE	NA	NA	0.00266559	14288	1.36e-05	36052	TRUE
36	rs73133996	C	G	C	G	0.0812	-0.0364	0.4558	NA	FALSE	TRUE	TRUE	ebi-a-GCST004692	3	98429219	0.0179	36052	0.0422105	Amyotrophic lateral sclerosis || id:ebi-a-GCST004692	Amyotrophic lateral sclerosis	Amyotrophic lateral sclerosis || ||	TRUE	igd	NA	NA	NA	NA	NA	NA	NA	9	0.012	1.32e-11	14288	90274846	TRUE	reported	OpTQk7	90274846	90274846	2	FALSE	NA	NA	0.00319484	14288	0.000114694	36052	TRUE
37	rs74351250	A	G	A	G	-0.2729	-0.0214	0.044	NA	FALSE	FALSE	FALSE	ebi-a-GCST004692	17	7569542	0.0459	36052	0.641	Amyotrophic lateral sclerosis || id:ebi-a-GCST004692	Amyotrophic lateral sclerosis	Amyotrophic lateral sclerosis || ||	TRUE	igd	NA	NA	NA	NA	NA	NA	NA	509	0.0326	5.71e-17	14288	90274846	TRUE	reported	OpTQk7	90274846	90274846	2	TRUE	NA	NA	0.00488131	14288	6.03e-06	36052	TRUE
38	rs9842051	C	G	C	G	0.1192	-0.0258	0.748	NA	FALSE	TRUE	TRUE	ebi-a-GCST004692	3	143021856	0.0204	36052	0.207	Amyotrophic lateral sclerosis || id:ebi-a-GCST004692	Amyotrophic lateral sclerosis	Amyotrophic lateral sclerosis || ||	TRUE	igd	NA	NA	NA	NA	NA	NA	NA	72	0.014	1.68e-17	14288	90274846	TRUE	reported	OpTQk7	90274846	90274846	2	FALSE	NA	NA	0.00504879	14288	4.44e-05	36052	TRUE
39	rs10207134	T	C	T	C	-0.0996	0.0432	0.326	NA	FALSE	FALSE	FALSE	ebi-a-GCST004692	2	228661828	0.0189	36052	0.02231	Amyotrophic lateral sclerosis || id:ebi-a-GCST004692	Amyotrophic lateral sclerosis	Amyotrophic lateral sclerosis || ||	TRUE	igd	NA	NA	NA	NA	NA	NA	NA	32	0.0128	7.18e-15	14287	90274766	TRUE	reported	xWK5mG	90274766	90274766	2	TRUE	NA	NA	0.00422067	14287	0.000144902	36052	TRUE
40	rs742493	T	C	T	C	0.1459	0.0311	0.883	NA	FALSE	FALSE	FALSE	ebi-a-GCST004692	6	40998167	0.0277	36052	0.2617	Amyotrophic lateral sclerosis || id:ebi-a-GCST004692	Amyotrophic lateral sclerosis	Amyotrophic lateral sclerosis || ||	TRUE	igd	NA	NA	NA	NA	NA	NA	NA	39	0.0185	3.11e-15	14735	90274766	TRUE	reported	xWK5mG	90274766	90274766	2	TRUE	NA	NA	0.00420384	14735	3.5e-05	36052	TRUE
41	rs12123181	A	G	A	G	-0.0996	0.0097	0.2042	NA	FALSE	FALSE	FALSE	ebi-a-GCST004692	1	206954566	0.0227	36052	0.6687	Amyotrophic lateral sclerosis || id:ebi-a-GCST004692	Amyotrophic lateral sclerosis	Amyotrophic lateral sclerosis || ||	TRUE	igd	NA	NA	NA	NA	NA	NA	NA	17	0.0151	4.22e-11	14296	90274795	TRUE	reported	zswQpR	90274795	90274795	2	TRUE	NA	NA	0.00303453	14296	5.07e-06	36052	TRUE
42	rs3135932	A	G	A	G	-0.1597	-0.0114	0.823	NA	FALSE	FALSE	FALSE	ebi-a-GCST004692	11	117864063	0.0247	36052	0.6457	Amyotrophic lateral sclerosis || id:ebi-a-GCST004692	Amyotrophic lateral sclerosis	Amyotrophic lateral sclerosis || ||	TRUE	igd	NA	NA	NA	NA	NA	NA	NA	785	0.0154	3.39e-25	14744	90274795	TRUE	reported	zswQpR	90274795	90274795	2	TRUE	NA	NA	0.00724195	14744	5.91e-06	36052	TRUE
43	rs398518	A	G	A	G	-0.1293	0.0299	0.9146	NA	FALSE	FALSE	FALSE	ebi-a-GCST004692	3	8954959	0.0339	36052	0.377	Amyotrophic lateral sclerosis || id:ebi-a-GCST004692	Amyotrophic lateral sclerosis	Amyotrophic lateral sclerosis || ||	TRUE	igd	NA	NA	NA	NA	NA	NA	NA	23	0.0218	3.01e-09	14296	90274795	TRUE	reported	zswQpR	90274795	90274795	2	TRUE	NA	NA	0.00245506	14296	2.16e-05	36052	TRUE
44	rs67037615	T	C	T	C	-0.1528	-0.0112	0.8893	NA	FALSE	FALSE	FALSE	ebi-a-GCST004692	6	32453163	0.0287	36052	0.6975	Amyotrophic lateral sclerosis || id:ebi-a-GCST004692	Amyotrophic lateral sclerosis	Amyotrophic lateral sclerosis || ||	TRUE	igd	NA	NA	NA	NA	NA	NA	NA	111	0.0196	6.39e-15	14296	90274795	TRUE	reported	zswQpR	90274795	90274795	2	TRUE	NA	NA	0.00423388	14296	4.22e-06	36052	TRUE
45	rs112665079	T	C	T	C	0.8932	0.0687	0.051	0.0524	FALSE	FALSE	FALSE	ebi-a-GCST005647	20	43120683	0.0328	80610	0.0361302	Amyotrophic lateral sclerosis || id:ebi-a-GCST005647	Amyotrophic lateral sclerosis	Amyotrophic lateral sclerosis || ||	TRUE	igd	NA	NA	NA	NA	NA	NA	NA	82	0.026	1e-200	14720	90274759	TRUE	reported	4Txn9p	90274759	90274759	2	TRUE	NA	NA	0.074234	14720	5.44e-05	80610	TRUE
46	rs138960575	A	G	A	G	0.2878	-0.101	0.9797	0.9815	FALSE	FALSE	FALSE	ebi-a-GCST005647	20	43240490	0.0646	80610	0.1179	Amyotrophic lateral sclerosis || id:ebi-a-GCST005647	Amyotrophic lateral sclerosis	Amyotrophic lateral sclerosis || ||	TRUE	igd	NA	NA	NA	NA	NA	NA	NA	200	0.0507	1.37e-08	14288	90274759	TRUE	reported	4Txn9p	90274759	90274759	2	TRUE	NA	NA	0.00225049	14288	3.03e-05	80610	TRUE
47	rs140060277	A	AT	A	AT	0.1547	0.0607	0.8827	0.8715	FALSE	FALSE	FALSE	ebi-a-GCST005647	20	43168393	0.0299	80610	0.0423497	Amyotrophic lateral sclerosis || id:ebi-a-GCST005647	Amyotrophic lateral sclerosis	Amyotrophic lateral sclerosis || ||	TRUE	igd	NA	NA	NA	NA	NA	NA	NA	138	0.0243	1.94e-10	10407	90274759	TRUE	reported	4Txn9p	90274759	90274759	2	TRUE	NA	NA	0.00388005	10407	5.11e-05	80610	TRUE
48	rs36216718	T	C	T	C	-0.1817	-0.0738	0.0552	0.0528	FALSE	FALSE	FALSE	ebi-a-GCST005647	20	43280349	0.0567	80610	0.1928	Amyotrophic lateral sclerosis || id:ebi-a-GCST005647	Amyotrophic lateral sclerosis	Amyotrophic lateral sclerosis || ||	TRUE	igd	NA	NA	NA	NA	NA	NA	NA	262	0.027	1.7e-11	14066	90274759	TRUE	reported	4Txn9p	90274759	90274759	2	TRUE	NA	NA	0.0032098	14066	2.1e-05	80610	TRUE
49	rs6017383	T	C	T	C	-0.1776	-0.0124	0.7625	0.76	FALSE	FALSE	FALSE	ebi-a-GCST005647	20	43298501	0.0178	80610	0.4887	Amyotrophic lateral sclerosis || id:ebi-a-GCST005647	Amyotrophic lateral sclerosis	Amyotrophic lateral sclerosis || ||	TRUE	igd	NA	NA	NA	NA	NA	NA	NA	301	0.0141	2.23e-36	14715	90274759	TRUE	reported	4Txn9p	90274759	90274759	2	TRUE	NA	NA	0.0106681	14715	6.02e-06	80610	TRUE
50	rs80212763	T	C	T	C	0.9687	-0.0603	0.0189	0.0168	FALSE	FALSE	FALSE	ebi-a-GCST005647	20	43223930	0.0601	80610	0.3152	Amyotrophic lateral sclerosis || id:ebi-a-GCST005647	Amyotrophic lateral sclerosis	Amyotrophic lateral sclerosis || ||	TRUE	igd	NA	NA	NA	NA	NA	NA	NA	180	0.0448	1.1e-103	14249	90274759	TRUE	reported	4Txn9p	90274759	90274759	2	TRUE	NA	NA	0.0317743	14249	1.25e-05	80610	TRUE
51	rs112046281	A	G	A	G	-0.6167	0.0831	0.0161	0.0181	FALSE	FALSE	FALSE	ebi-a-GCST005647	6	31769614	0.0532	80610	0.118	Amyotrophic lateral sclerosis || id:ebi-a-GCST005647	Amyotrophic lateral sclerosis	Amyotrophic lateral sclerosis || ||	TRUE	igd	NA	NA	NA	NA	NA	NA	NA	6054	0.0536	1.24e-30	11792	90274840	TRUE	reported	cr9BAQ	90274840	90274840	2	TRUE	NA	NA	0.0111034	11792	3.03e-05	80610	TRUE
52	rs148844907	A	T	A	T	-1	0.1543	0.013	0.0103	FALSE	TRUE	FALSE	ebi-a-GCST005647	6	31628397	0.1216	80610	0.2043	Amyotrophic lateral sclerosis || id:ebi-a-GCST005647	Amyotrophic lateral sclerosis	Amyotrophic lateral sclerosis || ||	TRUE	igd	NA	NA	NA	NA	NA	NA	NA	5998	0.0867	8.89e-31	7423	90274840	TRUE	reported	cr9BAQ	90274840	90274840	2	TRUE	NA	NA	0.017611	7423	2e-05	80610	TRUE
53	rs151218088	T	C	T	C	-0.6677	-0.0493	0.014	0.0126	FALSE	FALSE	FALSE	ebi-a-GCST005647	6	30540762	0.0826	80610	0.5505	Amyotrophic lateral sclerosis || id:ebi-a-GCST005647	Amyotrophic lateral sclerosis	Amyotrophic lateral sclerosis || ||	TRUE	igd	NA	NA	NA	NA	NA	NA	NA	883	0.0648	6.76e-25	10857	90274840	TRUE	reported	cr9BAQ	90274840	90274840	2	TRUE	NA	NA	0.00968625	10857	4.42e-06	80610	TRUE
54	rs2074475	T	C	T	C	0.2308	-0.0396	0.9618	0.9783	FALSE	FALSE	FALSE	ebi-a-GCST005647	6	30137890	0.0495	80610	0.4231	Amyotrophic lateral sclerosis || id:ebi-a-GCST005647	Amyotrophic lateral sclerosis	Amyotrophic lateral sclerosis || ||	TRUE	igd	NA	NA	NA	NA	NA	NA	NA	777	0.0421	4.2e-08	11792	90274840	TRUE	reported	cr9BAQ	90274840	90274840	2	TRUE	NA	NA	0.00254266	11792	7.94e-06	80610	TRUE
55	rs2364485	A	C	A	C	0.1759	-0.022	0.1645	0.1696	FALSE	FALSE	FALSE	ebi-a-GCST005647	12	6514963	0.0221	80610	0.32	Amyotrophic lateral sclerosis || id:ebi-a-GCST005647	Amyotrophic lateral sclerosis	Amyotrophic lateral sclerosis || ||	TRUE	igd	NA	NA	NA	NA	NA	NA	NA	7026	0.0189	1.32e-20	11344	90274840	TRUE	reported	cr9BAQ	90274840	90274840	2	TRUE	NA	NA	0.00757904	11344	1.23e-05	80610	TRUE
56	rs2523887	A	G	A	G	0.2057	0.0083	0.7362	0.71	FALSE	FALSE	FALSE	ebi-a-GCST005647	6	31040725	0.0151	80610	0.5841	Amyotrophic lateral sclerosis || id:ebi-a-GCST005647	Amyotrophic lateral sclerosis	Amyotrophic lateral sclerosis || ||	TRUE	igd	NA	NA	NA	NA	NA	NA	NA	1483	0.0148	6.45e-44	11792	90274840	TRUE	reported	cr9BAQ	90274840	90274840	2	TRUE	NA	NA	0.0161203	11792	3.75e-06	80610	TRUE
57	rs28366157	A	G	A	G	-0.217	0.0048	0.9465	0.946	FALSE	FALSE	FALSE	ebi-a-GCST005647	6	31672242	0.0308	80610	0.8749	Amyotrophic lateral sclerosis || id:ebi-a-GCST005647	Amyotrophic lateral sclerosis	Amyotrophic lateral sclerosis || ||	TRUE	igd	NA	NA	NA	NA	NA	NA	NA	6013	0.0313	4.12e-12	10918	90274840	TRUE	reported	cr9BAQ	90274840	90274840	2	TRUE	NA	NA	0.00438388	10918	3.01e-07	80610	TRUE
58	rs2894233	A	G	A	G	-0.3651	-0.067	0.9705	0.9732	FALSE	FALSE	FALSE	ebi-a-GCST005647	6	32011678	0.0504	80610	0.1837	Amyotrophic lateral sclerosis || id:ebi-a-GCST005647	Amyotrophic lateral sclerosis	Amyotrophic lateral sclerosis || ||	TRUE	igd	NA	NA	NA	NA	NA	NA	NA	6241	0.0539	1.26e-11	8974	90274840	TRUE	reported	cr9BAQ	90274840	90274840	2	TRUE	NA	NA	0.00508794	8974	2.19e-05	80610	TRUE
59	rs2904602	A	G	A	G	-0.625	0.0201	0.1165	0.1122	FALSE	FALSE	FALSE	ebi-a-GCST005647	6	31451847	0.0216	80610	0.3521	Amyotrophic lateral sclerosis || id:ebi-a-GCST005647	Amyotrophic lateral sclerosis	Amyotrophic lateral sclerosis || ||	TRUE	igd	NA	NA	NA	NA	NA	NA	NA	5384	0.0196	1e-200	11791	90274840	TRUE	reported	cr9BAQ	90274840	90274840	2	TRUE	NA	NA	0.0794036	11791	1.07e-05	80610	TRUE
60	rs3132518	C	G	C	G	0.1071	0.0234	0.4015	0.4036	FALSE	TRUE	FALSE	ebi-a-GCST005647	6	31140169	0.0139	80610	0.0914303	Amyotrophic lateral sclerosis || id:ebi-a-GCST005647	Amyotrophic lateral sclerosis	Amyotrophic lateral sclerosis || ||	TRUE	igd	NA	NA	NA	NA	NA	NA	NA	1974	0.0133	8.1e-16	11791	90274840	TRUE	reported	cr9BAQ	90274840	90274840	2	TRUE	NA	NA	0.00547037	11791	3.52e-05	80610	TRUE
61	rs62408379	T	C	T	C	-0.1523	0.014	0.0771	0.0836	FALSE	FALSE	FALSE	ebi-a-GCST005647	6	28722076	0.025	80610	0.5755	Amyotrophic lateral sclerosis || id:ebi-a-GCST005647	Amyotrophic lateral sclerosis	Amyotrophic lateral sclerosis || ||	TRUE	igd	NA	NA	NA	NA	NA	NA	NA	19	0.0248	8.19e-10	11774	90274840	TRUE	reported	cr9BAQ	90274840	90274840	2	TRUE	NA	NA	0.00319343	11774	3.89e-06	80610	TRUE
62	rs7310615	C	G	C	G	0.1356	-0.0447	0.4758	0.4866	FALSE	TRUE	TRUE	ebi-a-GCST005647	12	111865049	0.0138	80610	0.00121599	Amyotrophic lateral sclerosis || id:ebi-a-GCST005647	Amyotrophic lateral sclerosis	Amyotrophic lateral sclerosis || ||	TRUE	igd	NA	NA	NA	NA	NA	NA	NA	7040	0.0134	4.53e-24	11344	90274840	TRUE	reported	cr9BAQ	90274840	90274840	2	FALSE	NA	NA	0.00894781	11344	0.000130143	80610	TRUE
63	rs73390248	T	C	T	C	-0.2269	0.0484	0.1027	0.1045	FALSE	FALSE	FALSE	ebi-a-GCST005647	6	31329834	0.0224	80610	0.03046	Amyotrophic lateral sclerosis || id:ebi-a-GCST005647	Amyotrophic lateral sclerosis	Amyotrophic lateral sclerosis || ||	TRUE	igd	NA	NA	NA	NA	NA	NA	NA	4327	0.0223	2.57e-24	11792	90274840	TRUE	reported	cr9BAQ	90274840	90274840	2	TRUE	NA	NA	0.0087046	11792	5.79e-05	80610	TRUE
64	rs111865607	T	C	T	C	-0.1077	-0.0145	0.2079	0.22	FALSE	FALSE	FALSE	ebi-a-GCST005647	14	88422929	0.0295	80610	0.6234	Amyotrophic lateral sclerosis || id:ebi-a-GCST005647	Amyotrophic lateral sclerosis	Amyotrophic lateral sclerosis || ||	TRUE	igd	NA	NA	NA	NA	NA	NA	NA	8	0.0178	1.44e-09	10894	90274831	TRUE	reported	jYpwGU	90274831	90274831	2	TRUE	NA	NA	0.00334986	10894	3e-06	80610	TRUE
65	rs2511241	T	C	T	C	0.177	-0.0114	0.9163	0.9169	FALSE	FALSE	FALSE	ebi-a-GCST005647	11	72945341	0.028	80610	0.684101	Amyotrophic lateral sclerosis || id:ebi-a-GCST005647	Amyotrophic lateral sclerosis	Amyotrophic lateral sclerosis || ||	TRUE	igd	NA	NA	NA	NA	NA	NA	NA	4	0.0236	6.38e-14	13668	90274831	TRUE	reported	jYpwGU	90274831	90274831	2	TRUE	NA	NA	0.00409918	13668	2.06e-06	80610	TRUE
66	rs3859189	A	G	A	G	0.1101	-0.0041	0.5367	0.5084	FALSE	FALSE	FALSE	ebi-a-GCST005647	17	38137033	0.0137	80610	0.762901	Amyotrophic lateral sclerosis || id:ebi-a-GCST005647	Amyotrophic lateral sclerosis	Amyotrophic lateral sclerosis || ||	TRUE	igd	NA	NA	NA	NA	NA	NA	NA	121	0.0117	4.95e-21	14729	90274831	TRUE	reported	jYpwGU	90274831	90274831	2	TRUE	NA	NA	0.00597703	14729	1.11e-06	80610	TRUE
67	rs653178	T	C	T	C	-0.0728	0.0477	0.5224	0.5146	FALSE	FALSE	FALSE	ebi-a-GCST005647	12	112007756	0.0137	80610	0.0005175	Amyotrophic lateral sclerosis || id:ebi-a-GCST005647	Amyotrophic lateral sclerosis	Amyotrophic lateral sclerosis || ||	TRUE	igd	NA	NA	NA	NA	NA	NA	NA	7	0.0132	3.48e-08	11785	90274831	TRUE	reported	jYpwGU	90274831	90274831	2	TRUE	NA	NA	0.00257478	11785	0.000150367	80610	TRUE
68	rs9264931	T	C	T	C	-0.1048	-0.0124	0.8812	0.8746	FALSE	FALSE	FALSE	ebi-a-GCST005647	6	31274196	0.0209	80610	0.551099	Amyotrophic lateral sclerosis || id:ebi-a-GCST005647	Amyotrophic lateral sclerosis	Amyotrophic lateral sclerosis || ||	TRUE	igd	NA	NA	NA	NA	NA	NA	NA	1	0.0191	4.09e-08	14736	90274831	TRUE	reported	jYpwGU	90274831	90274831	2	TRUE	NA	NA	0.00203915	14736	4.37e-06	80610	TRUE
69	rs112635299	T	G	T	G	0.2618	-0.0445	0.0205	0.0179	FALSE	FALSE	FALSE	ebi-a-GCST005647	14	94838142	0.0572	80610	0.4365	Amyotrophic lateral sclerosis || id:ebi-a-GCST005647	Amyotrophic lateral sclerosis	Amyotrophic lateral sclerosis || ||	TRUE	igd	NA	NA	NA	NA	NA	NA	NA	281	0.0433	1.48e-09	14733	90274830	TRUE	reported	l69Bh4	90274830	90274830	2	TRUE	NA	NA	0.00247545	14733	7.51e-06	80610	TRUE
70	rs114165349	C	G	C	G	-0.1948	-0.0566	0.0337	0.0249	FALSE	TRUE	FALSE	ebi-a-GCST005647	1	27021913	0.0481	80610	0.2388	Amyotrophic lateral sclerosis || id:ebi-a-GCST005647	Amyotrophic lateral sclerosis	Amyotrophic lateral sclerosis || ||	TRUE	igd	NA	NA	NA	NA	NA	NA	NA	1	0.034	1.01e-08	14727	90274830	TRUE	reported	l69Bh4	90274830	90274830	2	TRUE	NA	NA	0.00222432	14727	1.72e-05	80610	TRUE
71	rs1493936	T	C	T	C	-0.258	0.1578	0.0224	0.0132	FALSE	FALSE	FALSE	ebi-a-GCST005647	8	119777640	0.0737	80610	0.03234	Amyotrophic lateral sclerosis || id:ebi-a-GCST005647	Amyotrophic lateral sclerosis	Amyotrophic lateral sclerosis || ||	TRUE	igd	NA	NA	NA	NA	NA	NA	NA	10	0.046	2.04e-08	14246	90274830	TRUE	reported	l69Bh4	90274830	90274830	2	TRUE	NA	NA	0.0022036	14246	5.69e-05	80610	TRUE
72	rs2247769	T	C	T	C	-0.1705	0.0021	0.5577	0.54	FALSE	FALSE	FALSE	ebi-a-GCST005647	8	120081031	0.014	80610	0.8791	Amyotrophic lateral sclerosis || id:ebi-a-GCST005647	Amyotrophic lateral sclerosis	Amyotrophic lateral sclerosis || ||	TRUE	igd	NA	NA	NA	NA	NA	NA	NA	57	0.0114	1.42e-50	14285	90274830	TRUE	reported	l69Bh4	90274830	90274830	2	TRUE	NA	NA	0.0154195	14285	2.79e-07	80610	TRUE
73	rs58792577	T	C	T	C	-0.0665	0.0279	0.6822	0.6822	FALSE	FALSE	FALSE	ebi-a-GCST005647	8	119805839	0.0147	80610	0.0574897	Amyotrophic lateral sclerosis || id:ebi-a-GCST005647	Amyotrophic lateral sclerosis	Amyotrophic lateral sclerosis || ||	TRUE	igd	NA	NA	NA	NA	NA	NA	NA	11	0.0119	2.29e-08	14724	90274830	TRUE	reported	l69Bh4	90274830	90274830	2	TRUE	NA	NA	0.00211671	14724	4.47e-05	80610	TRUE
74	rs704	A	G	A	G	-0.1404	0.0212	0.4726	0.4929	FALSE	FALSE	FALSE	ebi-a-GCST005647	17	26694861	0.0138	80610	0.124	Amyotrophic lateral sclerosis || id:ebi-a-GCST005647	Amyotrophic lateral sclerosis	Amyotrophic lateral sclerosis || ||	TRUE	igd	NA	NA	NA	NA	NA	NA	NA	344	0.0111	1.14e-36	14733	90274830	TRUE	reported	l69Bh4	90274830	90274830	2	TRUE	NA	NA	0.010744	14733	2.93e-05	80610	TRUE
75	rs9643126	C	G	C	G	0.0837	0.0156	0.4689	0.4033	FALSE	TRUE	TRUE	ebi-a-GCST005647	8	119443927	0.0265	80610	0.5569	Amyotrophic lateral sclerosis || id:ebi-a-GCST005647	Amyotrophic lateral sclerosis	Amyotrophic lateral sclerosis || ||	TRUE	igd	NA	NA	NA	NA	NA	NA	NA	7	0.0146	9.87e-09	10893	90274830	TRUE	reported	l69Bh4	90274830	90274830	2	FALSE	NA	NA	0.00300863	10893	4.3e-06	80610	TRUE
76	rs10901252	C	G	C	G	0.2068	-0.0635	0.0963	0.077	FALSE	TRUE	FALSE	ebi-a-GCST005647	9	136128000	0.0262	80610	0.0152598	Amyotrophic lateral sclerosis || id:ebi-a-GCST005647	Amyotrophic lateral sclerosis	Amyotrophic lateral sclerosis || ||	TRUE	igd	NA	NA	NA	NA	NA	NA	NA	132	0.0213	2.76e-22	11779	90274820	TRUE	reported	LNwUqU	90274820	90274820	2	TRUE	NA	NA	0.00794045	11779	7.29e-05	80610	TRUE
77	rs2289779	T	G	T	G	0.0788	-0.0017	0.5419	0.5425	FALSE	FALSE	FALSE	ebi-a-GCST005647	5	38527228	0.0142	80610	0.9063	Amyotrophic lateral sclerosis || id:ebi-a-GCST005647	Amyotrophic lateral sclerosis	Amyotrophic lateral sclerosis || ||	TRUE	igd	NA	NA	NA	NA	NA	NA	NA	1	0.0134	4.09e-09	11336	90274820	TRUE	reported	LNwUqU	90274820	90274820	2	TRUE	NA	NA	0.00304184	11336	1.78e-07	80610	TRUE
78	rs114882743	A	T	A	T	-0.3259	-0.0571	0.9804	0.9841	FALSE	TRUE	FALSE	ebi-a-GCST005647	1	176930254	0.0615	80610	0.3536	Amyotrophic lateral sclerosis || id:ebi-a-GCST005647	Amyotrophic lateral sclerosis	Amyotrophic lateral sclerosis || ||	TRUE	igd	NA	NA	NA	NA	NA	NA	NA	2	0.0548	2.73e-09	11345	90274802	TRUE	reported	nME2R9	90274802	90274802	2	TRUE	NA	NA	0.00310833	11345	1.07e-05	80610	TRUE
79	rs17700884	T	G	T	G	-0.105	-0.0183	0.3783	0.3525	FALSE	FALSE	FALSE	ebi-a-GCST005647	16	88684495	0.0144	80610	0.2032	Amyotrophic lateral sclerosis || id:ebi-a-GCST005647	Amyotrophic lateral sclerosis	Amyotrophic lateral sclerosis || ||	TRUE	igd	NA	NA	NA	NA	NA	NA	NA	25	0.0136	1.16e-14	11775	90274802	TRUE	reported	nME2R9	90274802	90274802	2	TRUE	NA	NA	0.00503756	11775	2e-05	80610	TRUE
80	rs10831650	A	G	A	G	0.0692	-0.0035	0.3558	0.3733	FALSE	FALSE	FALSE	ebi-a-GCST005647	11	11644391	0.0144	80610	0.8097	Amyotrophic lateral sclerosis || id:ebi-a-GCST005647	Amyotrophic lateral sclerosis	Amyotrophic lateral sclerosis || ||	TRUE	igd	NA	NA	NA	NA	NA	NA	NA	125	0.0125	3.09e-08	14288	90274846	TRUE	reported	OpTQk7	90274846	90274846	2	TRUE	NA	NA	0.00214067	14288	7.33e-07	80610	TRUE
81	rs13107325	T	C	T	C	0.2027	0.0445	0.0696	0.0763	FALSE	FALSE	FALSE	ebi-a-GCST005647	4	103188709	0.0262	80610	0.0894808	Amyotrophic lateral sclerosis || id:ebi-a-GCST005647	Amyotrophic lateral sclerosis	Amyotrophic lateral sclerosis || ||	TRUE	igd	NA	NA	NA	NA	NA	NA	NA	79	0.0236	8.77e-18	14733	90274846	TRUE	reported	OpTQk7	90274846	90274846	2	TRUE	NA	NA	0.0049829	14733	3.58e-05	80610	TRUE
82	rs34790908	T	C	T	C	0.211	0.0315	0.2563	0.2666	FALSE	FALSE	FALSE	ebi-a-GCST005647	17	7451110	0.0153	80610	0.03925	Amyotrophic lateral sclerosis || id:ebi-a-GCST005647	Amyotrophic lateral sclerosis	Amyotrophic lateral sclerosis || ||	TRUE	igd	NA	NA	NA	NA	NA	NA	NA	375	0.0129	3.9e-60	14732	90274846	TRUE	reported	OpTQk7	90274846	90274846	2	TRUE	NA	NA	0.0178388	14732	5.26e-05	80610	TRUE
83	rs62059693	T	C	T	C	0.1069	-0.0242	0.8557	0.8433	FALSE	FALSE	FALSE	ebi-a-GCST005647	17	7723513	0.0194	80610	0.214	Amyotrophic lateral sclerosis || id:ebi-a-GCST005647	Amyotrophic lateral sclerosis	Amyotrophic lateral sclerosis || ||	TRUE	igd	NA	NA	NA	NA	NA	NA	NA	545	0.0173	6.44e-10	14288	90274846	TRUE	reported	OpTQk7	90274846	90274846	2	TRUE	NA	NA	0.00266559	14288	1.93e-05	80610	TRUE
84	rs73133996	C	G	C	G	0.0812	-0.0264	0.4558	0.4575	FALSE	TRUE	TRUE	ebi-a-GCST005647	3	98429219	0.0138	80610	0.0555201	Amyotrophic lateral sclerosis || id:ebi-a-GCST005647	Amyotrophic lateral sclerosis	Amyotrophic lateral sclerosis || ||	TRUE	igd	NA	NA	NA	NA	NA	NA	NA	9	0.012	1.32e-11	14288	90274846	TRUE	reported	OpTQk7	90274846	90274846	2	FALSE	NA	NA	0.00319484	14288	4.54e-05	80610	TRUE
85	rs74351250	A	G	A	G	-0.2729	-0.0066	0.044	0.0463	FALSE	FALSE	FALSE	ebi-a-GCST005647	17	7569542	0.0373	80610	0.8603	Amyotrophic lateral sclerosis || id:ebi-a-GCST005647	Amyotrophic lateral sclerosis	Amyotrophic lateral sclerosis || ||	TRUE	igd	NA	NA	NA	NA	NA	NA	NA	509	0.0326	5.71e-17	14288	90274846	TRUE	reported	OpTQk7	90274846	90274846	2	TRUE	NA	NA	0.00488131	14288	3.88e-07	80610	TRUE
86	rs9842051	C	G	C	G	0.1192	-0.0146	0.748	0.7369	FALSE	TRUE	FALSE	ebi-a-GCST005647	3	143021856	0.0159	80610	0.3583	Amyotrophic lateral sclerosis || id:ebi-a-GCST005647	Amyotrophic lateral sclerosis	Amyotrophic lateral sclerosis || ||	TRUE	igd	NA	NA	NA	NA	NA	NA	NA	72	0.014	1.68e-17	14288	90274846	TRUE	reported	OpTQk7	90274846	90274846	2	TRUE	NA	NA	0.00504879	14288	1.05e-05	80610	TRUE
87	rs10207134	T	C	T	C	-0.0996	0.0368	0.326	0.3358	FALSE	FALSE	FALSE	ebi-a-GCST005647	2	228661828	0.0148	80610	0.01293	Amyotrophic lateral sclerosis || id:ebi-a-GCST005647	Amyotrophic lateral sclerosis	Amyotrophic lateral sclerosis || ||	TRUE	igd	NA	NA	NA	NA	NA	NA	NA	32	0.0128	7.18e-15	14287	90274766	TRUE	reported	xWK5mG	90274766	90274766	2	TRUE	NA	NA	0.00422067	14287	7.67e-05	80610	TRUE
88	rs742493	T	C	T	C	0.1459	-0.0027	0.883	0.8825	FALSE	FALSE	FALSE	ebi-a-GCST005647	6	40998167	0.0215	80610	0.8984	Amyotrophic lateral sclerosis || id:ebi-a-GCST005647	Amyotrophic lateral sclerosis	Amyotrophic lateral sclerosis || ||	TRUE	igd	NA	NA	NA	NA	NA	NA	NA	39	0.0185	3.11e-15	14735	90274766	TRUE	reported	xWK5mG	90274766	90274766	2	TRUE	NA	NA	0.00420384	14735	1.96e-07	80610	TRUE
89	rs12123181	A	G	A	G	-0.0996	0.0149	0.2042	0.2114	FALSE	FALSE	FALSE	ebi-a-GCST005647	1	206954566	0.0177	80610	0.3999	Amyotrophic lateral sclerosis || id:ebi-a-GCST005647	Amyotrophic lateral sclerosis	Amyotrophic lateral sclerosis || ||	TRUE	igd	NA	NA	NA	NA	NA	NA	NA	17	0.0151	4.22e-11	14296	90274795	TRUE	reported	zswQpR	90274795	90274795	2	TRUE	NA	NA	0.00303453	14296	8.79e-06	80610	TRUE
90	rs3135932	A	G	A	G	-0.1597	-0.0253	0.823	0.838	FALSE	FALSE	FALSE	ebi-a-GCST005647	11	117864063	0.0189	80610	0.1805	Amyotrophic lateral sclerosis || id:ebi-a-GCST005647	Amyotrophic lateral sclerosis	Amyotrophic lateral sclerosis || ||	TRUE	igd	NA	NA	NA	NA	NA	NA	NA	785	0.0154	3.39e-25	14744	90274795	TRUE	reported	zswQpR	90274795	90274795	2	TRUE	NA	NA	0.00724195	14744	2.22e-05	80610	TRUE
91	rs398518	A	G	A	G	-0.1293	0.015	0.9146	0.9208	FALSE	FALSE	FALSE	ebi-a-GCST005647	3	8954959	0.0285	80610	0.599	Amyotrophic lateral sclerosis || id:ebi-a-GCST005647	Amyotrophic lateral sclerosis	Amyotrophic lateral sclerosis || ||	TRUE	igd	NA	NA	NA	NA	NA	NA	NA	23	0.0218	3.01e-09	14296	90274795	TRUE	reported	zswQpR	90274795	90274795	2	TRUE	NA	NA	0.00245506	14296	3.44e-06	80610	TRUE
92	rs67037615	T	C	T	C	-0.1528	-0.0116	0.8893	0.8923	FALSE	FALSE	FALSE	ebi-a-GCST005647	6	32453163	0.0232	80610	0.615399	Amyotrophic lateral sclerosis || id:ebi-a-GCST005647	Amyotrophic lateral sclerosis	Amyotrophic lateral sclerosis || ||	TRUE	igd	NA	NA	NA	NA	NA	NA	NA	111	0.0196	6.39e-15	14296	90274795	TRUE	reported	zswQpR	90274795	90274795	2	TRUE	NA	NA	0.00423388	14296	3.1e-06	80610	TRUE
[truncated: 2 more columns]

## Sheet: S7
SNP details for the forward Mendelian randomization validation group (p<5e-7)
	SNP	effect_allele.exposure	other_allele.exposure	effect_allele.outcome	other_allele.outcome	beta.exposure	beta.outcome	eaf.exposure	eaf.outcome	remove	palindromic	ambiguous	id.outcome	chr	pos	se.outcome	samplesize.outcome	pval.outcome	outcome	originalname.outcome	outcome.deprecated	mr_keep.outcome	data_source.outcome	proxy.outcome	target_snp.outcome	proxy_snp.outcome	target_a1.outcome	target_a2.outcome	proxy_a1.outcome	proxy_a2.outcome	V1	se.exposure	pval.exposure	samplesize.exposure	exposure	mr_keep.exposure	pval_origin.exposure	id.exposure	data_source.exposure	group	action	mr_keep	units.outcome	units.exposure	rsq.exposure	effective_n.exposure	rsq.outcome	effective_n.outcome	steiger_dir
1	rs10207134	T	C	T	C	-0.0996	0.0432	0.326	NA	FALSE	FALSE	FALSE	ebi-a-GCST004692	2	228661828	0.0189	36052	0.02231	Amyotrophic lateral sclerosis || id:ebi-a-GCST004692	Amyotrophic lateral sclerosis	Amyotrophic lateral sclerosis || ||	TRUE	igd	NA	NA	NA	NA	NA	NA	NA	58	0.0128	7.18e-15	14287	90274766	TRUE	reported	21Jqov	90274766	90274766	2	TRUE	NA	NA	0.00422067	14287	0.000144902	36052	TRUE
2	rs117753190	C	G	C	G	-0.185	0.0032	0.9688	NA	FALSE	TRUE	TRUE	ebi-a-GCST004692	17	67136325	0.0519	36052	0.9504	Amyotrophic lateral sclerosis || id:ebi-a-GCST004692	Amyotrophic lateral sclerosis	Amyotrophic lateral sclerosis || ||	TRUE	igd	NA	NA	NA	NA	NA	NA	NA	92	0.0359	2.56e-07	14243	90274766	TRUE	reported	21Jqov	90274766	90274766	2	FALSE	NA	NA	0.00186125	14243	1.05e-07	36052	TRUE
3	rs117900576	C	G	C	G	-0.2256	-0.059	0.9694	NA	FALSE	TRUE	TRUE	ebi-a-GCST004692	17	72761195	0.0645	36052	0.36	Amyotrophic lateral sclerosis || id:ebi-a-GCST004692	Amyotrophic lateral sclerosis	Amyotrophic lateral sclerosis || ||	TRUE	igd	NA	NA	NA	NA	NA	NA	NA	94	0.0429	1.45e-07	13224	90274766	TRUE	reported	21Jqov	90274766	90274766	2	FALSE	NA	NA	0.00208718	13224	2.32e-05	36052	TRUE
4	rs742493	T	C	T	C	0.1459	0.0311	0.883	NA	FALSE	FALSE	FALSE	ebi-a-GCST004692	6	40998167	0.0277	36052	0.2617	Amyotrophic lateral sclerosis || id:ebi-a-GCST004692	Amyotrophic lateral sclerosis	Amyotrophic lateral sclerosis || ||	TRUE	igd	NA	NA	NA	NA	NA	NA	NA	68	0.0185	3.11e-15	14735	90274766	TRUE	reported	21Jqov	90274766	90274766	2	TRUE	NA	NA	0.00420384	14735	3.5e-05	36052	TRUE
5	rs9274623	T	G	T	G	-0.076	-0.039	0.215	NA	FALSE	FALSE	FALSE	ebi-a-GCST004692	6	32635998	0.0217	36052	0.0719598	Amyotrophic lateral sclerosis || id:ebi-a-GCST004692	Amyotrophic lateral sclerosis	Amyotrophic lateral sclerosis || ||	TRUE	igd	NA	NA	NA	NA	NA	NA	NA	62	0.0148	2.82e-07	14288	90274766	TRUE	reported	21Jqov	90274766	90274766	2	TRUE	NA	NA	0.00184243	14288	8.96e-05	36052	TRUE
6	rs10067443	T	C	T	C	-0.0753	0.0097	0.8011	NA	FALSE	FALSE	FALSE	ebi-a-GCST004692	5	19244332	0.0221	36052	0.6607	Amyotrophic lateral sclerosis || id:ebi-a-GCST004692	Amyotrophic lateral sclerosis	Amyotrophic lateral sclerosis || ||	TRUE	igd	NA	NA	NA	NA	NA	NA	NA	28	0.0149	4.33e-07	14296	90274795	TRUE	reported	4BJqee	90274795	90274795	2	TRUE	NA	NA	0.00178356	14296	5.34e-06	36052	TRUE
7	rs12123181	A	G	A	G	-0.0996	0.0097	0.2042	NA	FALSE	FALSE	FALSE	ebi-a-GCST004692	1	206954566	0.0227	36052	0.6687	Amyotrophic lateral sclerosis || id:ebi-a-GCST004692	Amyotrophic lateral sclerosis	Amyotrophic lateral sclerosis || ||	TRUE	igd	NA	NA	NA	NA	NA	NA	NA	19	0.0151	4.22e-11	14296	90274795	TRUE	reported	4BJqee	90274795	90274795	2	TRUE	NA	NA	0.00303453	14296	5.07e-06	36052	TRUE
8	rs184284634	A	G	A	G	0.141	-0.0053	0.8437	NA	FALSE	FALSE	FALSE	ebi-a-GCST004692	6	32508305	0.0572	36052	0.9258	Amyotrophic lateral sclerosis || id:ebi-a-GCST004692	Amyotrophic lateral sclerosis	Amyotrophic lateral sclerosis || ||	TRUE	igd	NA	NA	NA	NA	NA	NA	NA	353	0.0275	2.94e-07	8978	90274795	TRUE	reported	4BJqee	90274795	90274795	2	TRUE	NA	NA	0.00292025	8978	2.38e-07	36052	TRUE
9	rs3135932	A	G	A	G	-0.1597	-0.0114	0.823	NA	FALSE	FALSE	FALSE	ebi-a-GCST004692	11	117864063	0.0247	36052	0.6457	Amyotrophic lateral sclerosis || id:ebi-a-GCST004692	Amyotrophic lateral sclerosis	Amyotrophic lateral sclerosis || ||	TRUE	igd	NA	NA	NA	NA	NA	NA	NA	1226	0.0154	3.39e-25	14744	90274795	TRUE	reported	4BJqee	90274795	90274795	2	TRUE	NA	NA	0.00724195	14744	5.91e-06	36052	TRUE
10	rs398518	A	G	A	G	-0.1293	0.0299	0.9146	NA	FALSE	FALSE	FALSE	ebi-a-GCST004692	3	8954959	0.0339	36052	0.377	Amyotrophic lateral sclerosis || id:ebi-a-GCST004692	Amyotrophic lateral sclerosis	Amyotrophic lateral sclerosis || ||	TRUE	igd	NA	NA	NA	NA	NA	NA	NA	27	0.0218	3.01e-09	14296	90274795	TRUE	reported	4BJqee	90274795	90274795	2	TRUE	NA	NA	0.00245506	14296	2.16e-05	36052	TRUE
11	rs67037615	T	C	T	C	-0.1528	-0.0112	0.8893	NA	FALSE	FALSE	FALSE	ebi-a-GCST004692	6	32453163	0.0287	36052	0.6975	Amyotrophic lateral sclerosis || id:ebi-a-GCST004692	Amyotrophic lateral sclerosis	Amyotrophic lateral sclerosis || ||	TRUE	igd	NA	NA	NA	NA	NA	NA	NA	290	0.0196	6.39e-15	14296	90274795	TRUE	reported	4BJqee	90274795	90274795	2	TRUE	NA	NA	0.00423388	14296	4.22e-06	36052	TRUE
12	rs201464214	A	AT	A	AT	-0.2449	0.0823	0.9701	NA	FALSE	FALSE	FALSE	ebi-a-GCST004692	10	8132034	0.0601	36052	0.171	Amyotrophic lateral sclerosis || id:ebi-a-GCST004692	Amyotrophic lateral sclerosis	Amyotrophic lateral sclerosis || ||	TRUE	igd	NA	NA	NA	NA	NA	NA	NA	15	0.048	3.36e-07	8377	90274814	TRUE	reported	5mqCyg	90274814	90274814	2	TRUE	NA	NA	0.00309858	8377	5.2e-05	36052	TRUE
13	rs34639000	A	G	A	G	0.0765	0.0417	0.7289	NA	FALSE	FALSE	FALSE	ebi-a-GCST004692	5	95530542	0.0204	36052	0.0405005	Amyotrophic lateral sclerosis || id:ebi-a-GCST004692	Amyotrophic lateral sclerosis	Amyotrophic lateral sclerosis || ||	TRUE	igd	NA	NA	NA	NA	NA	NA	NA	2	0.0147	1.95e-07	11773	90274814	TRUE	reported	5mqCyg	90274814	90274814	2	TRUE	NA	NA	0.0022955	11773	0.000115893	36052	TRUE
14	rs114882743	A	T	A	T	-0.3259	-0.0496	0.9804	NA	FALSE	TRUE	TRUE	ebi-a-GCST004692	1	176930254	0.0794	36052	0.5322	Amyotrophic lateral sclerosis || id:ebi-a-GCST004692	Amyotrophic lateral sclerosis	Amyotrophic lateral sclerosis || ||	TRUE	igd	NA	NA	NA	NA	NA	NA	NA	2	0.0548	2.73e-09	11345	90274802	TRUE	reported	b8M8hB	90274802	90274802	2	FALSE	NA	NA	0.00310833	11345	1.08e-05	36052	TRUE
15	rs149756404	A	C	A	C	-0.2749	-0.0555	0.9809	NA	FALSE	FALSE	FALSE	ebi-a-GCST004692	2	239715033	0.063	36052	0.3781	Amyotrophic lateral sclerosis || id:ebi-a-GCST004692	Amyotrophic lateral sclerosis	Amyotrophic lateral sclerosis || ||	TRUE	igd	NA	NA	NA	NA	NA	NA	NA	4	0.0524	1.55e-07	11302	90274802	TRUE	reported	b8M8hB	90274802	90274802	2	TRUE	NA	NA	0.0024297	11302	2.15e-05	36052	TRUE
16	rs17700884	T	G	T	G	-0.105	-0.0213	0.3783	NA	FALSE	FALSE	FALSE	ebi-a-GCST004692	16	88684495	0.0187	36052	0.2552	Amyotrophic lateral sclerosis || id:ebi-a-GCST004692	Amyotrophic lateral sclerosis	Amyotrophic lateral sclerosis || ||	TRUE	igd	NA	NA	NA	NA	NA	NA	NA	38	0.0136	1.16e-14	11775	90274802	TRUE	reported	b8M8hB	90274802	90274802	2	TRUE	NA	NA	0.00503756	11775	3.6e-05	36052	TRUE
17	rs199658824	T	TG	T	TG	-0.2362	-0.0009	0.9733	NA	FALSE	FALSE	FALSE	ebi-a-GCST004692	12	52739413	0.0535	36052	0.9862	Amyotrophic lateral sclerosis || id:ebi-a-GCST004692	Amyotrophic lateral sclerosis	Amyotrophic lateral sclerosis || ||	TRUE	igd	NA	NA	NA	NA	NA	NA	NA	6	0.0468	4.49e-07	8391	90274802	TRUE	reported	b8M8hB	90274802	90274802	2	TRUE	NA	NA	0.0030272	8391	7.85e-09	36052	TRUE
18	rs10831650	A	G	A	G	0.0692	-0.0016	0.3558	NA	FALSE	FALSE	FALSE	ebi-a-GCST004692	11	11644391	0.0186	36052	0.9311	Amyotrophic lateral sclerosis || id:ebi-a-GCST004692	Amyotrophic lateral sclerosis	Amyotrophic lateral sclerosis || ||	TRUE	igd	NA	NA	NA	NA	NA	NA	NA	227	0.0125	3.09e-08	14288	90274846	TRUE	reported	cKs1iV	90274846	90274846	2	TRUE	NA	NA	0.00214067	14288	2.05e-07	36052	TRUE
19	rs114744971	A	G	A	G	-0.2291	-0.1773	0.9782	NA	FALSE	FALSE	FALSE	ebi-a-GCST004692	3	142748221	0.0724	36052	0.01439	Amyotrophic lateral sclerosis || id:ebi-a-GCST004692	Amyotrophic lateral sclerosis	Amyotrophic lateral sclerosis || ||	TRUE	igd	NA	NA	NA	NA	NA	NA	NA	149	0.0453	4.25e-07	14245	90274846	TRUE	reported	cKs1iV	90274846	90274846	2	TRUE	NA	NA	0.00179256	14245	0.000166327	36052	TRUE
20	rs12145644	A	T	A	T	-0.0727	0.0141	0.2484	NA	FALSE	TRUE	TRUE	ebi-a-GCST004692	1	162517994	0.0206	36052	0.4946	Amyotrophic lateral sclerosis || id:ebi-a-GCST004692	Amyotrophic lateral sclerosis	Amyotrophic lateral sclerosis || ||	TRUE	igd	NA	NA	NA	NA	NA	NA	NA	1	0.0141	2.52e-07	14287	90274846	TRUE	reported	cKs1iV	90274846	90274846	2	FALSE	NA	NA	0.00185756	14287	1.3e-05	36052	TRUE
21	rs13107325	T	C	T	C	0.2027	0.0501	0.0696	NA	FALSE	FALSE	FALSE	ebi-a-GCST004692	4	103188709	0.0357	36052	0.1604	Amyotrophic lateral sclerosis || id:ebi-a-GCST004692	Amyotrophic lateral sclerosis	Amyotrophic lateral sclerosis || ||	TRUE	igd	NA	NA	NA	NA	NA	NA	NA	159	0.0236	8.77e-18	14733	90274846	TRUE	reported	cKs1iV	90274846	90274846	2	TRUE	NA	NA	0.0049829	14733	5.46e-05	36052	TRUE
22	rs2163333	A	G	A	G	0.1404	-0.0276	0.9522	NA	FALSE	FALSE	FALSE	ebi-a-GCST004692	2	53077754	0.0412	36052	0.502599	Amyotrophic lateral sclerosis || id:ebi-a-GCST004692	Amyotrophic lateral sclerosis	Amyotrophic lateral sclerosis || ||	TRUE	igd	NA	NA	NA	NA	NA	NA	NA	2	0.0273	2.71e-07	14719	90274846	TRUE	reported	cKs1iV	90274846	90274846	2	TRUE	NA	NA	0.00179395	14719	1.24e-05	36052	TRUE
23	rs34790908	T	C	T	C	0.211	0.0509	0.2563	NA	FALSE	FALSE	FALSE	ebi-a-GCST004692	17	7451110	0.0199	36052	0.01064	Amyotrophic lateral sclerosis || id:ebi-a-GCST004692	Amyotrophic lateral sclerosis	Amyotrophic lateral sclerosis || ||	TRUE	igd	NA	NA	NA	NA	NA	NA	NA	487	0.0129	3.9e-60	14732	90274846	TRUE	reported	cKs1iV	90274846	90274846	2	TRUE	NA	NA	0.0178388	14732	0.000181445	36052	TRUE
24	rs4882710	T	C	T	C	0.0666	-0.0196	0.3457	NA	FALSE	FALSE	FALSE	ebi-a-GCST004692	12	129101566	0.0192	36052	0.3071	Amyotrophic lateral sclerosis || id:ebi-a-GCST004692	Amyotrophic lateral sclerosis	Amyotrophic lateral sclerosis || ||	TRUE	igd	NA	NA	NA	NA	NA	NA	NA	230	0.0131	3.7e-07	14288	90274846	TRUE	reported	cKs1iV	90274846	90274846	2	TRUE	NA	NA	0.00180597	14288	2.89e-05	36052	TRUE
25	rs62059693	T	C	T	C	0.1069	-0.0175	0.8557	NA	FALSE	FALSE	FALSE	ebi-a-GCST004692	17	7723513	0.025	36052	0.4848	Amyotrophic lateral sclerosis || id:ebi-a-GCST004692	Amyotrophic lateral sclerosis	Amyotrophic lateral sclerosis || ||	TRUE	igd	NA	NA	NA	NA	NA	NA	NA	676	0.0173	6.44e-10	14288	90274846	TRUE	reported	cKs1iV	90274846	90274846	2	TRUE	NA	NA	0.00266559	14288	1.36e-05	36052	TRUE
26	rs73133996	C	G	C	G	0.0812	-0.0364	0.4558	NA	FALSE	TRUE	TRUE	ebi-a-GCST004692	3	98429219	0.0179	36052	0.0422105	Amyotrophic lateral sclerosis || id:ebi-a-GCST004692	Amyotrophic lateral sclerosis	Amyotrophic lateral sclerosis || ||	TRUE	igd	NA	NA	NA	NA	NA	NA	NA	18	0.012	1.32e-11	14288	90274846	TRUE	reported	cKs1iV	90274846	90274846	2	FALSE	NA	NA	0.00319484	14288	0.000114694	36052	TRUE
27	rs74351250	A	G	A	G	-0.2729	-0.0214	0.044	NA	FALSE	FALSE	FALSE	ebi-a-GCST004692	17	7569542	0.0459	36052	0.641	Amyotrophic lateral sclerosis || id:ebi-a-GCST004692	Amyotrophic lateral sclerosis	Amyotrophic lateral sclerosis || ||	TRUE	igd	NA	NA	NA	NA	NA	NA	NA	622	0.0326	5.71e-17	14288	90274846	TRUE	reported	cKs1iV	90274846	90274846	2	TRUE	NA	NA	0.00488131	14288	6.03e-06	36052	TRUE
28	rs76133364	A	C	A	C	0.1896	0.0338	0.0315	NA	FALSE	FALSE	FALSE	ebi-a-GCST004692	19	19706214	0.0593	36052	0.568	Amyotrophic lateral sclerosis || id:ebi-a-GCST004692	Amyotrophic lateral sclerosis	Amyotrophic lateral sclerosis || ||	TRUE	igd	NA	NA	NA	NA	NA	NA	NA	685	0.0369	2.77e-07	13224	90274846	TRUE	reported	cKs1iV	90274846	90274846	2	TRUE	NA	NA	0.00199278	13224	9.01e-06	36052	TRUE
29	rs9842051	C	G	C	G	0.1192	-0.0258	0.748	NA	FALSE	TRUE	TRUE	ebi-a-GCST004692	3	143021856	0.0204	36052	0.207	Amyotrophic lateral sclerosis || id:ebi-a-GCST004692	Amyotrophic lateral sclerosis	Amyotrophic lateral sclerosis || ||	TRUE	igd	NA	NA	NA	NA	NA	NA	NA	151	0.014	1.68e-17	14288	90274846	TRUE	reported	cKs1iV	90274846	90274846	2	FALSE	NA	NA	0.00504879	14288	4.44e-05	36052	TRUE
30	rs112046281	A	G	A	G	-0.6167	0.1594	0.0161	NA	FALSE	FALSE	FALSE	ebi-a-GCST004692	6	31769614	0.0701	36052	0.02298	Amyotrophic lateral sclerosis || id:ebi-a-GCST004692	Amyotrophic lateral sclerosis	Amyotrophic lateral sclerosis || ||	TRUE	igd	NA	NA	NA	NA	NA	NA	NA	6585	0.0536	1.24e-30	11792	90274840	TRUE	reported	EU2AVM	90274840	90274840	2	TRUE	NA	NA	0.0111034	11792	0.000143408	36052	TRUE
31	rs114250919	T	C	T	C	0.2469	-0.0639	0.9743	NA	FALSE	FALSE	FALSE	ebi-a-GCST004692	5	21093728	0.0704	36052	0.3639	Amyotrophic lateral sclerosis || id:ebi-a-GCST004692	Amyotrophic lateral sclerosis	Amyotrophic lateral sclerosis || ||	TRUE	igd	NA	NA	NA	NA	NA	NA	NA	1	0.049	4.69e-07	11305	90274840	TRUE	reported	EU2AVM	90274840	90274840	2	TRUE	NA	NA	0.00224121	11305	2.29e-05	36052	TRUE
32	rs151218088	T	C	T	C	-0.6677	-0.1537	0.014	NA	FALSE	FALSE	FALSE	ebi-a-GCST004692	6	30540762	0.1026	36052	0.1342	Amyotrophic lateral sclerosis || id:ebi-a-GCST004692	Amyotrophic lateral sclerosis	Amyotrophic lateral sclerosis || ||	TRUE	igd	NA	NA	NA	NA	NA	NA	NA	1017	0.0648	6.76e-25	10857	90274840	TRUE	reported	EU2AVM	90274840	90274840	2	TRUE	NA	NA	0.00968625	10857	6.22e-05	36052	TRUE
33	rs185420195	T	C	T	C	0.2473	-0.1088	0.0255	NA	FALSE	FALSE	FALSE	ebi-a-GCST004692	6	30989631	0.0653	36052	0.0958694	Amyotrophic lateral sclerosis || id:ebi-a-GCST004692	Amyotrophic lateral sclerosis	Amyotrophic lateral sclerosis || ||	TRUE	igd	NA	NA	NA	NA	NA	NA	NA	1342	0.046	7.61e-08	11344	90274840	TRUE	reported	EU2AVM	90274840	90274840	2	TRUE	NA	NA	0.00254178	11344	7.7e-05	36052	TRUE
34	rs200934644	T	TCAAA	T	TCAAA	0.3646	0.089	0.9523	NA	FALSE	FALSE	FALSE	ebi-a-GCST004692	6	31063595	0.0573	36052	0.1206	Amyotrophic lateral sclerosis || id:ebi-a-GCST004692	Amyotrophic lateral sclerosis	Amyotrophic lateral sclerosis || ||	TRUE	igd	NA	NA	NA	NA	NA	NA	NA	1786	0.0444	2.18e-16	7943	90274840	TRUE	reported	EU2AVM	90274840	90274840	2	TRUE	NA	NA	0.00842015	7943	6.69e-05	36052	TRUE
35	rs2074475	T	C	T	C	0.2308	-0.0595	0.9618	NA	FALSE	FALSE	FALSE	ebi-a-GCST004692	6	30137890	0.0631	36052	0.346	Amyotrophic lateral sclerosis || id:ebi-a-GCST004692	Amyotrophic lateral sclerosis	Amyotrophic lateral sclerosis || ||	TRUE	igd	NA	NA	NA	NA	NA	NA	NA	873	0.0421	4.2e-08	11792	90274840	TRUE	reported	EU2AVM	90274840	90274840	2	TRUE	NA	NA	0.00254266	11792	2.47e-05	36052	TRUE
36	rs2364485	A	C	A	C	0.1759	-0.0371	0.1645	NA	FALSE	FALSE	FALSE	ebi-a-GCST004692	12	6514963	0.0246	36052	0.1321	Amyotrophic lateral sclerosis || id:ebi-a-GCST004692	Amyotrophic lateral sclerosis	Amyotrophic lateral sclerosis || ||	TRUE	igd	NA	NA	NA	NA	NA	NA	NA	8046	0.0189	1.32e-20	11344	90274840	TRUE	reported	EU2AVM	90274840	90274840	2	TRUE	NA	NA	0.00757904	11344	6.31e-05	36052	TRUE
37	rs2523887	A	G	A	G	0.2057	0.0086	0.7362	NA	FALSE	FALSE	FALSE	ebi-a-GCST004692	6	31040725	0.0198	36052	0.6623	Amyotrophic lateral sclerosis || id:ebi-a-GCST004692	Amyotrophic lateral sclerosis	Amyotrophic lateral sclerosis || ||	TRUE	igd	NA	NA	NA	NA	NA	NA	NA	1641	0.0148	6.45e-44	11792	90274840	TRUE	reported	EU2AVM	90274840	90274840	2	TRUE	NA	NA	0.0161203	11792	5.23e-06	36052	TRUE
38	rs28366157	A	G	A	G	-0.217	0.0185	0.9465	NA	FALSE	FALSE	FALSE	ebi-a-GCST004692	6	31672242	0.0405	36052	0.6475	Amyotrophic lateral sclerosis || id:ebi-a-GCST004692	Amyotrophic lateral sclerosis	Amyotrophic lateral sclerosis || ||	TRUE	igd	NA	NA	NA	NA	NA	NA	NA	6541	0.0313	4.12e-12	10918	90274840	TRUE	reported	EU2AVM	90274840	90274840	2	TRUE	NA	NA	0.00438388	10918	5.79e-06	36052	TRUE
39	rs2894233	A	G	A	G	-0.3651	-0.1035	0.9705	NA	FALSE	FALSE	FALSE	ebi-a-GCST004692	6	32011678	0.0592	36052	0.0804804	Amyotrophic lateral sclerosis || id:ebi-a-GCST004692	Amyotrophic lateral sclerosis	Amyotrophic lateral sclerosis || ||	TRUE	igd	NA	NA	NA	NA	NA	NA	NA	6798	0.0539	1.26e-11	8974	90274840	TRUE	reported	EU2AVM	90274840	90274840	2	TRUE	NA	NA	0.00508794	8974	8.48e-05	36052	TRUE
40	rs2904602	A	G	A	G	-0.625	0.0026	0.1165	NA	FALSE	FALSE	FALSE	ebi-a-GCST004692	6	31451847	0.0278	36052	0.926	Amyotrophic lateral sclerosis || id:ebi-a-GCST004692	Amyotrophic lateral sclerosis	Amyotrophic lateral sclerosis || ||	TRUE	igd	NA	NA	NA	NA	NA	NA	NA	5890	0.0196	1e-200	11791	90274840	TRUE	reported	EU2AVM	90274840	90274840	2	TRUE	NA	NA	0.0794036	11791	2.43e-07	36052	TRUE
41	rs3132518	C	G	C	G	0.1071	0.0413	0.4015	NA	FALSE	TRUE	TRUE	ebi-a-GCST004692	6	31140169	0.0181	36052	0.0221401	Amyotrophic lateral sclerosis || id:ebi-a-GCST004692	Amyotrophic lateral sclerosis	Amyotrophic lateral sclerosis || ||	TRUE	igd	NA	NA	NA	NA	NA	NA	NA	2198	0.0133	8.1e-16	11791	90274840	TRUE	reported	EU2AVM	90274840	90274840	2	FALSE	NA	NA	0.00547037	11791	0.000144403	36052	TRUE
42	rs62408379	T	C	T	C	-0.1523	-0.0137	0.0771	NA	FALSE	FALSE	FALSE	ebi-a-GCST004692	6	28722076	0.0329	36052	0.6767	Amyotrophic lateral sclerosis || id:ebi-a-GCST004692	Amyotrophic lateral sclerosis	Amyotrophic lateral sclerosis || ||	TRUE	igd	NA	NA	NA	NA	NA	NA	NA	32	0.0248	8.19e-10	11774	90274840	TRUE	reported	EU2AVM	90274840	90274840	2	TRUE	NA	NA	0.00319343	11774	4.81e-06	36052	TRUE
43	rs7310615	C	G	C	G	0.1356	-0.0467	0.4758	NA	FALSE	TRUE	TRUE	ebi-a-GCST004692	12	111865049	0.0177	36052	0.00835103	Amyotrophic lateral sclerosis || id:ebi-a-GCST004692	Amyotrophic lateral sclerosis	Amyotrophic lateral sclerosis || ||	TRUE	igd	NA	NA	NA	NA	NA	NA	NA	8085	0.0134	4.53e-24	11344	90274840	TRUE	reported	EU2AVM	90274840	90274840	2	FALSE	NA	NA	0.00894781	11344	0.000193063	36052	TRUE
44	rs73390248	T	C	T	C	-0.2269	0.0528	0.1027	NA	FALSE	FALSE	FALSE	ebi-a-GCST004692	6	31329834	0.0294	36052	0.0725404	Amyotrophic lateral sclerosis || id:ebi-a-GCST004692	Amyotrophic lateral sclerosis	Amyotrophic lateral sclerosis || ||	TRUE	igd	NA	NA	NA	NA	NA	NA	NA	4746	0.0223	2.57e-24	11792	90274840	TRUE	reported	EU2AVM	90274840	90274840	2	TRUE	NA	NA	0.0087046	11792	8.95e-05	36052	TRUE
45	rs78477739	T	C	T	C	0.1462	0.0075	0.7457	NA	FALSE	FALSE	FALSE	ebi-a-GCST004692	6	32457465	0.0293	36052	0.7992	Amyotrophic lateral sclerosis || id:ebi-a-GCST004692	Amyotrophic lateral sclerosis	Amyotrophic lateral sclerosis || ||	TRUE	igd	TRUE	rs78477739	rs148333241	C	T	C	T	7157	0.0285	2.9e-07	6057	90274840	TRUE	reported	EU2AVM	90274840	90274840	2	TRUE	NA	NA	0.0043272	6057	1.82e-06	36052	TRUE
46	rs1034059	A	G	A	G	0.076	0.0074	0.6981	NA	FALSE	FALSE	FALSE	ebi-a-GCST004692	6	158193698	0.0217	36052	0.733199	Amyotrophic lateral sclerosis || id:ebi-a-GCST004692	Amyotrophic lateral sclerosis	Amyotrophic lateral sclerosis || ||	TRUE	igd	NA	NA	NA	NA	NA	NA	NA	2	0.0145	1.59e-07	14288	90274834	TRUE	reported	FylY98	90274834	90274834	2	TRUE	NA	NA	0.00191931	14288	3.23e-06	36052	TRUE
47	rs12531843	C	G	C	G	-0.1286	0.0185	0.9177	NA	FALSE	TRUE	TRUE	ebi-a-GCST004692	7	14143486	0.0328	36052	0.5721	Amyotrophic lateral sclerosis || id:ebi-a-GCST004692	Amyotrophic lateral sclerosis	Amyotrophic lateral sclerosis || ||	TRUE	igd	NA	NA	NA	NA	NA	NA	NA	3	0.0243	1.21e-07	12404	90274834	TRUE	reported	FylY98	90274834	90274834	2	FALSE	NA	NA	0.00225319	12404	8.82e-06	36052	TRUE
48	rs182274799	A	G	A	G	0.1565	0.0127	0.0646	NA	FALSE	FALSE	FALSE	ebi-a-GCST004692	11	10358788	0.0356	36052	0.7212	Amyotrophic lateral sclerosis || id:ebi-a-GCST004692	Amyotrophic lateral sclerosis	Amyotrophic lateral sclerosis || ||	TRUE	igd	NA	NA	NA	NA	NA	NA	NA	2	0.031	4.46e-07	9461	90274828	TRUE	reported	NtVxxV	90274828	90274828	2	TRUE	NA	NA	0.00268715	9461	3.53e-06	36052	TRUE
49	rs2285179	A	G	A	G	-0.0663	-0.0056	0.5586	NA	FALSE	FALSE	FALSE	ebi-a-GCST004692	22	38211954	0.0178	36052	0.7533	Amyotrophic lateral sclerosis || id:ebi-a-GCST004692	Amyotrophic lateral sclerosis	Amyotrophic lateral sclerosis || ||	TRUE	igd	NA	NA	NA	NA	NA	NA	NA	604	0.0122	5.5e-08	14288	90274831	TRUE	reported	o9UFHR	90274831	90274831	2	TRUE	NA	NA	0.002063	14288	2.75e-06	36052	TRUE
50	rs2511241	T	C	T	C	0.177	-0.0055	0.9163	NA	FALSE	FALSE	FALSE	ebi-a-GCST004692	11	72945341	0.037	36052	0.8822	Amyotrophic lateral sclerosis || id:ebi-a-GCST004692	Amyotrophic lateral sclerosis	Amyotrophic lateral sclerosis || ||	TRUE	igd	NA	NA	NA	NA	NA	NA	NA	222	0.0236	6.38e-14	13668	90274831	TRUE	reported	o9UFHR	90274831	90274831	2	TRUE	NA	NA	0.00409918	13668	6.13e-07	36052	TRUE
51	rs3859189	A	G	A	G	0.1101	-0.011	0.5367	NA	FALSE	FALSE	FALSE	ebi-a-GCST004692	17	38137033	0.0177	36052	0.535499	Amyotrophic lateral sclerosis || id:ebi-a-GCST004692	Amyotrophic lateral sclerosis	Amyotrophic lateral sclerosis || ||	TRUE	igd	NA	NA	NA	NA	NA	NA	NA	420	0.0117	4.95e-21	14729	90274831	TRUE	reported	o9UFHR	90274831	90274831	2	TRUE	NA	NA	0.00597703	14729	1.07e-05	36052	TRUE
52	rs653178	T	C	T	C	-0.0728	0.0464	0.5224	NA	FALSE	FALSE	FALSE	ebi-a-GCST004692	12	112007756	0.0177	36052	0.00879691	Amyotrophic lateral sclerosis || id:ebi-a-GCST004692	Amyotrophic lateral sclerosis	Amyotrophic lateral sclerosis || ||	TRUE	igd	NA	NA	NA	NA	NA	NA	NA	232	0.0132	3.48e-08	11785	90274831	TRUE	reported	o9UFHR	90274831	90274831	2	TRUE	NA	NA	0.00257478	11785	0.000190591	36052	TRUE
53	rs74472890	T	C	T	C	-0.1426	-0.0419	0.9471	NA	FALSE	FALSE	FALSE	ebi-a-GCST004692	11	72946279	0.0479	36052	0.3818	Amyotrophic lateral sclerosis || id:ebi-a-GCST004692	Amyotrophic lateral sclerosis	Amyotrophic lateral sclerosis || ||	TRUE	igd	NA	NA	NA	NA	NA	NA	NA	224	0.0281	3.88e-07	14735	90274831	TRUE	reported	o9UFHR	90274831	90274831	2	TRUE	NA	NA	0.00174493	14735	2.12e-05	36052	TRUE
54	rs9264931	T	C	T	C	-0.1048	-0.0202	0.8812	NA	FALSE	FALSE	FALSE	ebi-a-GCST004692	6	31274196	0.0275	36052	0.4626	Amyotrophic lateral sclerosis || id:ebi-a-GCST004692	Amyotrophic lateral sclerosis	Amyotrophic lateral sclerosis || ||	TRUE	igd	NA	NA	NA	NA	NA	NA	NA	167	0.0191	4.09e-08	14736	90274831	TRUE	reported	o9UFHR	90274831	90274831	2	TRUE	NA	NA	0.00203915	14736	1.5e-05	36052	TRUE
55	rs10901252	C	G	C	G	0.2068	-0.095	0.0963	NA	FALSE	TRUE	TRUE	ebi-a-GCST004692	9	136128000	0.0339	36052	0.00506104	Amyotrophic lateral sclerosis || id:ebi-a-GCST004692	Amyotrophic lateral sclerosis	Amyotrophic lateral sclerosis || ||	TRUE	igd	NA	NA	NA	NA	NA	NA	NA	163	0.0213	2.76e-22	11779	90274820	TRUE	reported	PAoWMk	90274820	90274820	2	FALSE	NA	NA	0.00794045	11779	0.000217795	36052	TRUE
56	rs2289779	T	G	T	G	0.0788	0.0033	0.5419	NA	FALSE	FALSE	FALSE	ebi-a-GCST004692	5	38527228	0.0179	36052	0.8558	Amyotrophic lateral sclerosis || id:ebi-a-GCST004692	Amyotrophic lateral sclerosis	Amyotrophic lateral sclerosis || ||	TRUE	igd	NA	NA	NA	NA	NA	NA	NA	13	0.0134	4.09e-09	11336	90274820	TRUE	reported	PAoWMk	90274820	90274820	2	TRUE	NA	NA	0.00304184	11336	9.43e-07	36052	TRUE
57	rs4937122	T	G	T	G	0.1262	0.0429	0.9129	NA	FALSE	FALSE	FALSE	ebi-a-GCST004692	11	126228659	0.0335	36052	0.2007	Amyotrophic lateral sclerosis || id:ebi-a-GCST004692	Amyotrophic lateral sclerosis	Amyotrophic lateral sclerosis || ||	TRUE	igd	NA	NA	NA	NA	NA	NA	NA	466	0.0248	3.61e-07	11336	90274820	TRUE	reported	PAoWMk	90274820	90274820	2	TRUE	NA	NA	0.00227951	11336	4.55e-05	36052	TRUE
58	rs10142466	A	G	A	G	0.057	-0.0316	0.49	NA	FALSE	FALSE	FALSE	ebi-a-GCST004692	14	69271784	0.0177	36052	0.0733297	Amyotrophic lateral sclerosis || id:ebi-a-GCST004692	Amyotrophic lateral sclerosis	Amyotrophic lateral sclerosis || ||	TRUE	igd	NA	NA	NA	NA	NA	NA	NA	416	0.0109	1.7e-07	14721	90274830	TRUE	reported	tTlhSF	90274830	90274830	2	TRUE	NA	NA	0.00185444	14721	8.84e-05	36052	TRUE
59	rs112635299	T	G	T	G	0.2618	-0.0723	0.0205	NA	FALSE	FALSE	FALSE	ebi-a-GCST004692	14	94838142	0.0742	36052	0.3298	Amyotrophic lateral sclerosis || id:ebi-a-GCST004692	Amyotrophic lateral sclerosis	Amyotrophic lateral sclerosis || ||	TRUE	igd	NA	NA	NA	NA	NA	NA	NA	425	0.0433	1.48e-09	14733	90274830	TRUE	reported	tTlhSF	90274830	90274830	2	TRUE	NA	NA	0.00247545	14733	2.63e-05	36052	TRUE
60	rs114165349	C	G	C	G	-0.1948	-0.0805	0.0337	NA	FALSE	TRUE	TRUE	ebi-a-GCST004692	1	27021913	0.0584	36052	0.1677	Amyotrophic lateral sclerosis || id:ebi-a-GCST004692	Amyotrophic lateral sclerosis	Amyotrophic lateral sclerosis || ||	TRUE	igd	NA	NA	NA	NA	NA	NA	NA	2	0.034	1.01e-08	14727	90274830	TRUE	reported	tTlhSF	90274830	90274830	2	FALSE	NA	NA	0.00222432	14727	5.27e-05	36052	TRUE
61	rs1230164	C	G	C	G	-0.0671	-0.0101	0.7288	NA	FALSE	TRUE	TRUE	ebi-a-GCST004692	4	99986023	0.0197	36052	0.609	Amyotrophic lateral sclerosis || id:ebi-a-GCST004692	Amyotrophic lateral sclerosis	Amyotrophic lateral sclerosis || ||	TRUE	igd	NA	NA	NA	NA	NA	NA	NA	7	0.0129	1.98e-07	14285	90274830	TRUE	reported	tTlhSF	90274830	90274830	2	FALSE	NA	NA	0.00189071	14285	7.29e-06	36052	TRUE
62	rs1437633	A	C	A	C	-0.079	-0.0078	0.2072	NA	FALSE	FALSE	FALSE	ebi-a-GCST004692	11	16272199	0.0219	36052	0.720701	Amyotrophic lateral sclerosis || id:ebi-a-GCST004692	Amyotrophic lateral sclerosis	Amyotrophic lateral sclerosis || ||	TRUE	igd	NA	NA	NA	NA	NA	NA	NA	413	0.0147	7.69e-08	12851	90274830	TRUE	reported	tTlhSF	90274830	90274830	2	TRUE	NA	NA	0.00224272	12851	3.52e-06	36052	TRUE
63	rs1493936	T	C	T	C	-0.258	0.1652	0.0224	NA	FALSE	FALSE	FALSE	ebi-a-GCST004692	8	119777640	0.0878	36052	0.06008	Amyotrophic lateral sclerosis || id:ebi-a-GCST004692	Amyotrophic lateral sclerosis	Amyotrophic lateral sclerosis || ||	TRUE	igd	NA	NA	NA	NA	NA	NA	NA	77	0.046	2.04e-08	14246	90274830	TRUE	reported	tTlhSF	90274830	90274830	2	TRUE	NA	NA	0.0022036	14246	9.82e-05	36052	TRUE
64	rs17600346	T	C	T	C	-0.1569	0.0445	0.9631	NA	FALSE	FALSE	FALSE	ebi-a-GCST004692	3	172223982	0.0449	36052	0.3218	Amyotrophic lateral sclerosis || id:ebi-a-GCST004692	Amyotrophic lateral sclerosis	Amyotrophic lateral sclerosis || ||	TRUE	igd	NA	NA	NA	NA	NA	NA	NA	5	0.0299	1.54e-07	14723	90274830	TRUE	reported	tTlhSF	90274830	90274830	2	TRUE	NA	NA	0.00186704	14723	2.72e-05	36052	TRUE
65	rs2247769	T	C	T	C	-0.1705	0.0186	0.5577	NA	FALSE	FALSE	FALSE	ebi-a-GCST004692	8	120081031	0.0176	36052	0.2925	Amyotrophic lateral sclerosis || id:ebi-a-GCST004692	Amyotrophic lateral sclerosis	Amyotrophic lateral sclerosis || ||	TRUE	igd	NA	NA	NA	NA	NA	NA	NA	165	0.0114	1.42e-50	14285	90274830	TRUE	reported	tTlhSF	90274830	90274830	2	TRUE	NA	NA	0.0154195	14285	3.1e-05	36052	TRUE
66	rs271665	T	C	T	C	-0.0672	0.0211	0.748	NA	FALSE	FALSE	FALSE	ebi-a-GCST004692	17	47938521	0.0213	36052	0.3223	Amyotrophic lateral sclerosis || id:ebi-a-GCST004692	Amyotrophic lateral sclerosis	Amyotrophic lateral sclerosis || ||	TRUE	igd	NA	NA	NA	NA	NA	NA	NA	617	0.0129	1.9e-07	14710	90274830	TRUE	reported	tTlhSF	90274830	90274830	2	TRUE	NA	NA	0.00184164	14710	2.72e-05	36052	TRUE
67	rs58792577	T	C	T	C	-0.0665	0.0267	0.6822	NA	FALSE	FALSE	FALSE	ebi-a-GCST004692	8	119805839	0.0191	36052	0.1616	Amyotrophic lateral sclerosis || id:ebi-a-GCST004692	Amyotrophic lateral sclerosis	Amyotrophic lateral sclerosis || ||	TRUE	igd	NA	NA	NA	NA	NA	NA	NA	79	0.0119	2.29e-08	14724	90274830	TRUE	reported	tTlhSF	90274830	90274830	2	TRUE	NA	NA	0.00211671	14724	5.42e-05	36052	TRUE
68	rs704	A	G	A	G	-0.1404	0.0285	0.4726	NA	FALSE	FALSE	FALSE	ebi-a-GCST004692	17	26694861	0.0178	36052	0.1103	Amyotrophic lateral sclerosis || id:ebi-a-GCST004692	Amyotrophic lateral sclerosis	Amyotrophic lateral sclerosis || ||	TRUE	igd	NA	NA	NA	NA	NA	NA	NA	499	0.0111	1.14e-36	14733	90274830	TRUE	reported	tTlhSF	90274830	90274830	2	TRUE	NA	NA	0.010744	14733	7.11e-05	36052	TRUE
69	rs112665079	T	C	T	C	0.8932	0.0838	0.051	NA	FALSE	FALSE	FALSE	ebi-a-GCST004692	20	43120683	0.0403	36052	0.0376097	Amyotrophic lateral sclerosis || id:ebi-a-GCST004692	Amyotrophic lateral sclerosis	Amyotrophic lateral sclerosis || ||	TRUE	igd	NA	NA	NA	NA	NA	NA	NA	100	0.026	1e-200	14720	90274759	TRUE	reported	zbyXYr	90274759	90274759	2	TRUE	NA	NA	0.074234	14720	0.000119928	36052	TRUE
70	rs138960575	A	G	A	G	0.2878	-0.1721	0.9797	NA	FALSE	FALSE	FALSE	ebi-a-GCST004692	20	43240490	0.0737	36052	0.0195601	Amyotrophic lateral sclerosis || id:ebi-a-GCST004692	Amyotrophic lateral sclerosis	Amyotrophic lateral sclerosis || ||	TRUE	igd	NA	NA	NA	NA	NA	NA	NA	221	0.0507	1.37e-08	14288	90274759	TRUE	reported	zbyXYr	90274759	90274759	2	TRUE	NA	NA	0.00225049	14288	0.000151236	36052	TRUE
71	rs147706532	A	G	A	G	-0.1816	-0.0225	0.0369	NA	FALSE	FALSE	FALSE	ebi-a-GCST004692	20	43086107	0.0545	36052	0.6805	Amyotrophic lateral sclerosis || id:ebi-a-GCST004692	Amyotrophic lateral sclerosis	Amyotrophic lateral sclerosis || ||	TRUE	igd	NA	NA	NA	NA	NA	NA	NA	66	0.034	9.23e-08	14714	90274759	TRUE	reported	zbyXYr	90274759	90274759	2	TRUE	NA	NA	0.00193536	14714	4.73e-06	36052	TRUE
72	rs6017383	T	C	T	C	-0.1776	0.0041	0.7625	NA	FALSE	FALSE	FALSE	ebi-a-GCST004692	20	43298501	0.0218	36052	0.8528	Amyotrophic lateral sclerosis || id:ebi-a-GCST004692	Amyotrophic lateral sclerosis	Amyotrophic lateral sclerosis || ||	TRUE	igd	NA	NA	NA	NA	NA	NA	NA	327	0.0141	2.23e-36	14715	90274759	TRUE	reported	zbyXYr	90274759	90274759	2	TRUE	NA	NA	0.0106681	14715	9.81e-07	36052	TRUE
73	rs6130598	A	G	A	G	0.0771	0.0119	0.2279	NA	FALSE	FALSE	FALSE	ebi-a-GCST004692	20	42994389	0.0212	36052	0.5757	Amyotrophic lateral sclerosis || id:ebi-a-GCST004692	Amyotrophic lateral sclerosis	Amyotrophic lateral sclerosis || ||	TRUE	igd	NA	NA	NA	NA	NA	NA	NA	26	0.0142	5.65e-08	14288	90274759	TRUE	reported	zbyXYr	90274759	90274759	2	TRUE	NA	NA	0.00205933	14288	8.74e-06	36052	TRUE
74	rs80212763	T	C	T	C	0.9687	-0.085	0.0189	NA	FALSE	FALSE	FALSE	ebi-a-GCST004692	20	43223930	0.072	36052	0.2375	Amyotrophic lateral sclerosis || id:ebi-a-GCST004692	Amyotrophic lateral sclerosis	Amyotrophic lateral sclerosis || ||	TRUE	igd	NA	NA	NA	NA	NA	NA	NA	201	0.0448	1.1e-103	14249	90274759	TRUE	reported	zbyXYr	90274759	90274759	2	TRUE	NA	NA	0.0317743	14249	3.87e-05	36052	TRUE
75	rs10207134	T	C	T	C	-0.0996	0.0368	0.326	0.3358	FALSE	FALSE	FALSE	ebi-a-GCST005647	2	228661828	0.0148	80610	0.01293	Amyotrophic lateral sclerosis || id:ebi-a-GCST005647	Amyotrophic lateral sclerosis	Amyotrophic lateral sclerosis || ||	TRUE	igd	NA	NA	NA	NA	NA	NA	NA	58	0.0128	7.18e-15	14287	90274766	TRUE	reported	21Jqov	90274766	90274766	2	TRUE	NA	NA	0.00422067	14287	7.67e-05	80610	TRUE
76	rs117753190	C	G	C	G	-0.185	-0.0326	0.9688	0.967	FALSE	TRUE	FALSE	ebi-a-GCST005647	17	67136325	0.0419	80610	0.4361	Amyotrophic lateral sclerosis || id:ebi-a-GCST005647	Amyotrophic lateral sclerosis	Amyotrophic lateral sclerosis || ||	TRUE	igd	NA	NA	NA	NA	NA	NA	NA	92	0.0359	2.56e-07	14243	90274766	TRUE	reported	21Jqov	90274766	90274766	2	TRUE	NA	NA	0.00186125	14243	7.51e-06	80610	TRUE
77	rs117900576	C	G	C	G	-0.2256	-0.0411	0.9694	0.9712	FALSE	TRUE	FALSE	ebi-a-GCST005647	17	72761195	0.0598	80610	0.4922	Amyotrophic lateral sclerosis || id:ebi-a-GCST005647	Amyotrophic lateral sclerosis	Amyotrophic lateral sclerosis || ||	TRUE	igd	NA	NA	NA	NA	NA	NA	NA	94	0.0429	1.45e-07	13224	90274766	TRUE	reported	21Jqov	90274766	90274766	2	TRUE	NA	NA	0.00208718	13224	5.86e-06	80610	TRUE
78	rs742493	T	C	T	C	0.1459	-0.0027	0.883	0.8825	FALSE	FALSE	FALSE	ebi-a-GCST005647	6	40998167	0.0215	80610	0.8984	Amyotrophic lateral sclerosis || id:ebi-a-GCST005647	Amyotrophic lateral sclerosis	Amyotrophic lateral sclerosis || ||	TRUE	igd	NA	NA	NA	NA	NA	NA	NA	68	0.0185	3.11e-15	14735	90274766	TRUE	reported	21Jqov	90274766	90274766	2	TRUE	NA	NA	0.00420384	14735	1.96e-07	80610	TRUE
79	rs9274623	T	G	T	G	-0.076	-0.039	0.215	0.2207	FALSE	FALSE	FALSE	ebi-a-GCST005647	6	32635998	0.0217	80610	0.0723003	Amyotrophic lateral sclerosis || id:ebi-a-GCST005647	Amyotrophic lateral sclerosis	Amyotrophic lateral sclerosis || ||	TRUE	igd	NA	NA	NA	NA	NA	NA	NA	62	0.0148	2.82e-07	14288	90274766	TRUE	reported	21Jqov	90274766	90274766	2	TRUE	NA	NA	0.00184243	14288	4.01e-05	80610	TRUE
80	rs10067443	T	C	T	C	-0.0753	-0.0037	0.8011	0.7968	FALSE	FALSE	FALSE	ebi-a-GCST005647	5	19244332	0.0173	80610	0.8286	Amyotrophic lateral sclerosis || id:ebi-a-GCST005647	Amyotrophic lateral sclerosis	Amyotrophic lateral sclerosis || ||	TRUE	igd	NA	NA	NA	NA	NA	NA	NA	28	0.0149	4.33e-07	14296	90274795	TRUE	reported	4BJqee	90274795	90274795	2	TRUE	NA	NA	0.00178356	14296	5.67e-07	80610	TRUE
81	rs12123181	A	G	A	G	-0.0996	0.0149	0.2042	0.2114	FALSE	FALSE	FALSE	ebi-a-GCST005647	1	206954566	0.0177	80610	0.3999	Amyotrophic lateral sclerosis || id:ebi-a-GCST005647	Amyotrophic lateral sclerosis	Amyotrophic lateral sclerosis || ||	TRUE	igd	NA	NA	NA	NA	NA	NA	NA	19	0.0151	4.22e-11	14296	90274795	TRUE	reported	4BJqee	90274795	90274795	2	TRUE	NA	NA	0.00303453	14296	8.79e-06	80610	TRUE
82	rs184284634	A	G	A	G	0.141	-0.0053	0.8437	0.9686	FALSE	FALSE	FALSE	ebi-a-GCST005647	6	32508305	0.0572	80610	0.9262	Amyotrophic lateral sclerosis || id:ebi-a-GCST005647	Amyotrophic lateral sclerosis	Amyotrophic lateral sclerosis || ||	TRUE	igd	NA	NA	NA	NA	NA	NA	NA	353	0.0275	2.94e-07	8978	90274795	TRUE	reported	4BJqee	90274795	90274795	2	TRUE	NA	NA	0.00292025	8978	1.07e-07	80610	TRUE
83	rs3135932	A	G	A	G	-0.1597	-0.0253	0.823	0.838	FALSE	FALSE	FALSE	ebi-a-GCST005647	11	117864063	0.0189	80610	0.1805	Amyotrophic lateral sclerosis || id:ebi-a-GCST005647	Amyotrophic lateral sclerosis	Amyotrophic lateral sclerosis || ||	TRUE	igd	NA	NA	NA	NA	NA	NA	NA	1226	0.0154	3.39e-25	14744	90274795	TRUE	reported	4BJqee	90274795	90274795	2	TRUE	NA	NA	0.00724195	14744	2.22e-05	80610	TRUE
84	rs398518	A	G	A	G	-0.1293	0.015	0.9146	0.9208	FALSE	FALSE	FALSE	ebi-a-GCST005647	3	8954959	0.0285	80610	0.599	Amyotrophic lateral sclerosis || id:ebi-a-GCST005647	Amyotrophic lateral sclerosis	Amyotrophic lateral sclerosis || ||	TRUE	igd	NA	NA	NA	NA	NA	NA	NA	27	0.0218	3.01e-09	14296	90274795	TRUE	reported	4BJqee	90274795	90274795	2	TRUE	NA	NA	0.00245506	14296	3.44e-06	80610	TRUE
85	rs67037615	T	C	T	C	-0.1528	-0.0116	0.8893	0.8923	FALSE	FALSE	FALSE	ebi-a-GCST005647	6	32453163	0.0232	80610	0.615399	Amyotrophic lateral sclerosis || id:ebi-a-GCST005647	Amyotrophic lateral sclerosis	Amyotrophic lateral sclerosis || ||	TRUE	igd	NA	NA	NA	NA	NA	NA	NA	290	0.0196	6.39e-15	14296	90274795	TRUE	reported	4BJqee	90274795	90274795	2	TRUE	NA	NA	0.00423388	14296	3.1e-06	80610	TRUE
86	rs201464214	A	AT	A	AT	-0.2449	0.0415	0.9701	0.9727	FALSE	FALSE	FALSE	ebi-a-GCST005647	10	8132034	0.0497	80610	0.4034	Amyotrophic lateral sclerosis || id:ebi-a-GCST005647	Amyotrophic lateral sclerosis	Amyotrophic lateral sclerosis || ||	TRUE	igd	NA	NA	NA	NA	NA	NA	NA	15	0.048	3.36e-07	8377	90274814	TRUE	reported	5mqCyg	90274814	90274814	2	TRUE	NA	NA	0.00309858	8377	8.65e-06	80610	TRUE
87	rs34639000	A	G	A	G	0.0765	0.043	0.7289	0.7481	FALSE	FALSE	FALSE	ebi-a-GCST005647	5	95530542	0.0159	80610	0.00685993	Amyotrophic lateral sclerosis || id:ebi-a-GCST005647	Amyotrophic lateral sclerosis	Amyotrophic lateral sclerosis || ||	TRUE	igd	NA	NA	NA	NA	NA	NA	NA	2	0.0147	1.95e-07	11773	90274814	TRUE	reported	5mqCyg	90274814	90274814	2	TRUE	NA	NA	0.0022955	11773	9.07e-05	80610	TRUE
88	rs114882743	A	T	A	T	-0.3259	-0.0571	0.9804	0.9841	FALSE	TRUE	FALSE	ebi-a-GCST005647	1	176930254	0.0615	80610	0.3536	Amyotrophic lateral sclerosis || id:ebi-a-GCST005647	Amyotrophic lateral sclerosis	Amyotrophic lateral sclerosis || ||	TRUE	igd	NA	NA	NA	NA	NA	NA	NA	2	0.0548	2.73e-09	11345	90274802	TRUE	reported	b8M8hB	90274802	90274802	2	TRUE	NA	NA	0.00310833	11345	1.07e-05	80610	TRUE
89	rs149756404	A	C	A	C	-0.2749	-0.0354	0.9809	0.9776	FALSE	FALSE	FALSE	ebi-a-GCST005647	2	239715033	0.0506	80610	0.4838	Amyotrophic lateral sclerosis || id:ebi-a-GCST005647	Amyotrophic lateral sclerosis	Amyotrophic lateral sclerosis || ||	TRUE	igd	NA	NA	NA	NA	NA	NA	NA	4	0.0524	1.55e-07	11302	90274802	TRUE	reported	b8M8hB	90274802	90274802	2	TRUE	NA	NA	0.0024297	11302	6.07e-06	80610	TRUE
90	rs17700884	T	G	T	G	-0.105	-0.0183	0.3783	0.3525	FALSE	FALSE	FALSE	ebi-a-GCST005647	16	88684495	0.0144	80610	0.2032	Amyotrophic lateral sclerosis || id:ebi-a-GCST005647	Amyotrophic lateral sclerosis	Amyotrophic lateral sclerosis || ||	TRUE	igd	NA	NA	NA	NA	NA	NA	NA	38	0.0136	1.16e-14	11775	90274802	TRUE	reported	b8M8hB	90274802	90274802	2	TRUE	NA	NA	0.00503756	11775	2e-05	80610	TRUE
91	rs199658824	T	TG	T	TG	-0.2362	0.0015	0.9733	0.9701	FALSE	FALSE	FALSE	ebi-a-GCST005647	12	52739413	0.0406	80610	0.971	Amyotrophic lateral sclerosis || id:ebi-a-GCST005647	Amyotrophic lateral sclerosis	Amyotrophic lateral sclerosis || ||	TRUE	igd	NA	NA	NA	NA	NA	NA	NA	6	0.0468	4.49e-07	8391	90274802	TRUE	reported	b8M8hB	90274802	90274802	2	TRUE	NA	NA	0.0030272	8391	1.69e-08	80610	TRUE
92	rs10831650	A	G	A	G	0.0692	-0.0035	0.3558	0.3733	FALSE	FALSE	FALSE	ebi-a-GCST005647	11	11644391	0.0144	80610	0.8097	Amyotrophic lateral sclerosis || id:ebi-a-GCST005647	Amyotrophic lateral sclerosis	Amyotrophic lateral sclerosis || ||	TRUE	igd	NA	NA	NA	NA	NA	NA	NA	227	0.0125	3.09e-08	14288	90274846	TRUE	reported	cKs1iV	90274846	90274846	2	TRUE	NA	NA	0.00214067	14288	7.33e-07	80610	TRUE
93	rs114744971	A	G	A	G	-0.2291	-0.1376	0.9782	0.9836	FALSE	FALSE	FALSE	ebi-a-GCST005647	3	142748221	0.0588	80610	0.0192699	Amyotrophic lateral sclerosis || id:ebi-a-GCST005647	Amyotrophic lateral sclerosis	Amyotrophic lateral sclerosis || ||	TRUE	igd	NA	NA	NA	NA	NA	NA	NA	149	0.0453	4.25e-07	14245	90274846	TRUE	reported	cKs1iV	90274846	90274846	2	TRUE	NA	NA	0.00179256	14245	6.79e-05	80610	TRUE
94	rs12145644	A	T	A	T	-0.0727	0.0047	0.2484	0.2491	FALSE	TRUE	FALSE	ebi-a-GCST005647	1	162517994	0.0168	80610	0.7807	Amyotrophic lateral sclerosis || id:ebi-a-GCST005647	Amyotrophic lateral sclerosis	Amyotrophic lateral sclerosis || ||	TRUE	igd	NA	NA	NA	NA	NA	NA	NA	1	0.0141	2.52e-07	14287	90274846	TRUE	reported	cKs1iV	90274846	90274846	2	TRUE	NA	NA	0.00185756	14287	9.71e-07	80610	TRUE
95	rs13107325	T	C	T	C	0.2027	0.0445	0.0696	0.0763	FALSE	FALSE	FALSE	ebi-a-GCST005647	4	103188709	0.0262	80610	0.0894808	Amyotrophic lateral sclerosis || id:ebi-a-GCST005647	Amyotrophic lateral sclerosis	Amyotrophic lateral sclerosis || ||	TRUE	igd	NA	NA	NA	NA	NA	NA	NA	159	0.0236	8.77e-18	14733	90274846	TRUE	reported	cKs1iV	90274846	90274846	2	TRUE	NA	NA	0.0049829	14733	3.58e-05	80610	TRUE
96	rs201620545	A	G	A	G	-0.0849	-0.0247	0.8184	0.8225	FALSE	FALSE	FALSE	ebi-a-GCST005647	2	99371601	0.0286	80610	0.3882	Amyotrophic lateral sclerosis || id:ebi-a-GCST005647	Amyotrophic lateral sclerosis	Amyotrophic lateral sclerosis || ||	TRUE	igd	NA	NA	NA	NA	NA	NA	NA	3	0.0168	4.34e-07	11327	90274846	TRUE	reported	cKs1iV	90274846	90274846	2	TRUE	NA	NA	0.00224999	11327	9.25e-06	80610	TRUE
97	rs2163333	A	G	A	G	0.1404	-0.0064	0.9522	0.9517	FALSE	FALSE	FALSE	ebi-a-GCST005647	2	53077754	0.0319	80610	0.84	Amyotrophic lateral sclerosis || id:ebi-a-GCST005647	Amyotrophic lateral sclerosis	Amyotrophic lateral sclerosis || ||	TRUE	igd	NA	NA	NA	NA	NA	NA	NA	2	0.0273	2.71e-07	14719	90274846	TRUE	reported	cKs1iV	90274846	90274846	2	TRUE	NA	NA	0.00179395	14719	4.99e-07	80610	TRUE
98	rs34790908	T	C	T	C	0.211	0.0315	0.2563	0.2666	FALSE	FALSE	FALSE	ebi-a-GCST005647	17	7451110	0.0153	80610	0.03925	Amyotrophic lateral sclerosis || id:ebi-a-GCST005647	Amyotrophic lateral sclerosis	Amyotrophic lateral sclerosis || ||	TRUE	igd	NA	NA	NA	NA	NA	NA	NA	487	0.0129	3.9e-60	14732	90274846	TRUE	reported	cKs1iV	90274846	90274846	2	TRUE	NA	NA	0.0178388	14732	5.26e-05	80610	TRUE
99	rs4882710	T	C	T	C	0.0666	-0.001	0.3457	0.3207	FALSE	FALSE	FALSE	ebi-a-GCST005647	12	129101566	0.0167	80610	0.9519	Amyotrophic lateral sclerosis || id:ebi-a-GCST005647	Amyotrophic lateral sclerosis	Amyotrophic lateral sclerosis || ||	TRUE	igd	NA	NA	NA	NA	NA	NA	NA	230	0.0131	3.7e-07	14288	90274846	TRUE	reported	cKs1iV	90274846	90274846	2	TRUE	NA	NA	0.00180597	14288	4.45e-08	80610	TRUE
100	rs62059693	T	C	T	C	0.1069	-0.0242	0.8557	0.8433	FALSE	FALSE	FALSE	ebi-a-GCST005647	17	7723513	0.0194	80610	0.214	Amyotrophic lateral sclerosis || id:ebi-a-GCST005647	Amyotrophic lateral sclerosis	Amyotrophic lateral sclerosis || ||	TRUE	igd	NA	NA	NA	NA	NA	NA	NA	676	0.0173	6.44e-10	14288	90274846	TRUE	reported	cKs1iV	90274846	90274846	2	TRUE	NA	NA	0.00266559	14288	1.93e-05	80610	TRUE
101	rs73133996	C	G	C	G	0.0812	-0.0264	0.4558	0.4575	FALSE	TRUE	TRUE	ebi-a-GCST005647	3	98429219	0.0138	80610	0.0555201	Amyotrophic lateral sclerosis || id:ebi-a-GCST005647	Amyotrophic lateral sclerosis	Amyotrophic lateral sclerosis || ||	TRUE	igd	NA	NA	NA	NA	NA	NA	NA	18	0.012	1.32e-11	14288	90274846	TRUE	reported	cKs1iV	90274846	90274846	2	FALSE	NA	NA	0.00319484	14288	4.54e-05	80610	TRUE
102	rs74351250	A	G	A	G	-0.2729	-0.0066	0.044	0.0463	FALSE	FALSE	FALSE	ebi-a-GCST005647	17	7569542	0.0373	80610	0.8603	Amyotrophic lateral sclerosis || id:ebi-a-GCST005647	Amyotrophic lateral sclerosis	Amyotrophic lateral sclerosis || ||	TRUE	igd	NA	NA	NA	NA	NA	NA	NA	622	0.0326	5.71e-17	14288	90274846	TRUE	reported	cKs1iV	90274846	90274846	2	TRUE	NA	NA	0.00488131	14288	3.88e-07	80610	TRUE
103	rs76133364	A	C	A	C	0.1896	0.0045	0.0315	0.0257	FALSE	FALSE	FALSE	ebi-a-GCST005647	19	19706214	0.0483	80610	0.9255	Amyotrophic lateral sclerosis || id:ebi-a-GCST005647	Amyotrophic lateral sclerosis	Amyotrophic lateral sclerosis || ||	TRUE	igd	NA	NA	NA	NA	NA	NA	NA	685	0.0369	2.77e-07	13224	90274846	TRUE	reported	cKs1iV	90274846	90274846	2	TRUE	NA	NA	0.00199278	13224	1.08e-07	80610	TRUE
104	rs9842051	C	G	C	G	0.1192	-0.0146	0.748	0.7369	FALSE	TRUE	FALSE	ebi-a-GCST005647	3	143021856	0.0159	80610	0.3583	Amyotrophic lateral sclerosis || id:ebi-a-GCST005647	Amyotrophic lateral sclerosis	Amyotrophic lateral sclerosis || ||	TRUE	igd	NA	NA	NA	NA	NA	NA	NA	151	0.014	1.68e-17	14288	90274846	TRUE	reported	cKs1iV	90274846	90274846	2	TRUE	NA	NA	0.00504879	14288	1.05e-05	80610	TRUE
105	rs112046281	A	G	A	G	-0.6167	0.0831	0.0161	0.0181	FALSE	FALSE	FALSE	ebi-a-GCST005647	6	31769614	0.0532	80610	0.118	Amyotrophic lateral sclerosis || id:ebi-a-GCST005647	Amyotrophic lateral sclerosis	Amyotrophic lateral sclerosis || ||	TRUE	igd	NA	NA	NA	NA	NA	NA	NA	6585	0.0536	1.24e-30	11792	90274840	TRUE	reported	EU2AVM	90274840	90274840	2	TRUE	NA	NA	0.0111034	11792	3.03e-05	80610	TRUE
106	rs114250919	T	C	T	C	0.2469	-0.0777	0.9743	0.9782	FALSE	FALSE	FALSE	ebi-a-GCST005647	5	21093728	0.0616	80610	0.2072	Amyotrophic lateral sclerosis || id:ebi-a-GCST005647	Amyotrophic lateral sclerosis	Amyotrophic lateral sclerosis || ||	TRUE	igd	NA	NA	NA	NA	NA	NA	NA	1	0.049	4.69e-07	11305	90274840	TRUE	reported	EU2AVM	90274840	90274840	2	TRUE	NA	NA	0.00224121	11305	1.97e-05	80610	TRUE
107	rs148844907	A	T	A	T	-1	0.1543	0.013	0.0103	FALSE	TRUE	FALSE	ebi-a-GCST005647	6	31628397	0.1216	80610	0.2043	Amyotrophic lateral sclerosis || id:ebi-a-GCST005647	Amyotrophic lateral sclerosis	Amyotrophic lateral sclerosis || ||	TRUE	igd	NA	NA	NA	NA	NA	NA	NA	6525	0.0867	8.89e-31	7423	90274840	TRUE	reported	EU2AVM	90274840	90274840	2	TRUE	NA	NA	0.017611	7423	2e-05	80610	TRUE
108	rs151218088	T	C	T	C	-0.6677	-0.0493	0.014	0.0126	FALSE	FALSE	FALSE	ebi-a-GCST005647	6	30540762	0.0826	80610	0.5505	Amyotrophic lateral sclerosis || id:ebi-a-GCST005647	Amyotrophic lateral sclerosis	Amyotrophic lateral sclerosis || ||	TRUE	igd	NA	NA	NA	NA	NA	NA	NA	1017	0.0648	6.76e-25	10857	90274840	TRUE	reported	EU2AVM	90274840	90274840	2	TRUE	NA	NA	0.00968625	10857	4.42e-06	80610	TRUE
109	rs185420195	T	C	T	C	0.2473	-0.0469	0.0255	0.0241	FALSE	FALSE	FALSE	ebi-a-GCST005647	6	30989631	0.0475	80610	0.3239	Amyotrophic lateral sclerosis || id:ebi-a-GCST005647	Amyotrophic lateral sclerosis	Amyotrophic lateral sclerosis || ||	TRUE	igd	NA	NA	NA	NA	NA	NA	NA	1342	0.046	7.61e-08	11344	90274840	TRUE	reported	EU2AVM	90274840	90274840	2	TRUE	NA	NA	0.00254178	11344	1.21e-05	80610	TRUE
110	rs2074475	T	C	T	C	0.2308	-0.0396	0.9618	0.9783	FALSE	FALSE	FALSE	ebi-a-GCST005647	6	30137890	0.0495	80610	0.4231	Amyotrophic lateral sclerosis || id:ebi-a-GCST005647	Amyotrophic lateral sclerosis	Amyotrophic lateral sclerosis || ||	TRUE	igd	NA	NA	NA	NA	NA	NA	NA	873	0.0421	4.2e-08	11792	90274840	TRUE	reported	EU2AVM	90274840	90274840	2	TRUE	NA	NA	0.00254266	11792	7.94e-06	80610	TRUE
111	rs2364485	A	C	A	C	0.1759	-0.022	0.1645	0.1696	FALSE	FALSE	FALSE	ebi-a-GCST005647	12	6514963	0.0221	80610	0.32	Amyotrophic lateral sclerosis || id:ebi-a-GCST005647	Amyotrophic lateral sclerosis	Amyotrophic lateral sclerosis || ||	TRUE	igd	NA	NA	NA	NA	NA	NA	NA	8046	0.0189	1.32e-20	11344	90274840	TRUE	reported	EU2AVM	90274840	90274840	2	TRUE	NA	NA	0.00757904	11344	1.23e-05	80610	TRUE
112	rs2523887	A	G	A	G	0.2057	0.0083	0.7362	0.71	FALSE	FALSE	FALSE	ebi-a-GCST005647	6	31040725	0.0151	80610	0.5841	Amyotrophic lateral sclerosis || id:ebi-a-GCST005647	Amyotrophic lateral sclerosis	Amyotrophic lateral sclerosis || ||	TRUE	igd	NA	NA	NA	NA	NA	NA	NA	1641	0.0148	6.45e-44	11792	90274840	TRUE	reported	EU2AVM	90274840	90274840	2	TRUE	NA	NA	0.0161203	11792	3.75e-06	80610	TRUE
113	rs28366157	A	G	A	G	-0.217	0.0048	0.9465	0.946	FALSE	FALSE	FALSE	ebi-a-GCST005647	6	31672242	0.0308	80610	0.8749	Amyotrophic lateral sclerosis || id:ebi-a-GCST005647	Amyotrophic lateral sclerosis	Amyotrophic lateral sclerosis || ||	TRUE	igd	NA	NA	NA	NA	NA	NA	NA	6541	0.0313	4.12e-12	10918	90274840	TRUE	reported	EU2AVM	90274840	90274840	2	TRUE	NA	NA	0.00438388	10918	3.01e-07	80610	TRUE
114	rs2894233	A	G	A	G	-0.3651	-0.067	0.9705	0.9732	FALSE	FALSE	FALSE	ebi-a-GCST005647	6	32011678	0.0504	80610	0.1837	Amyotrophic lateral sclerosis || id:ebi-a-GCST005647	Amyotrophic lateral sclerosis	Amyotrophic lateral sclerosis || ||	TRUE	igd	NA	NA	NA	NA	NA	NA	NA	6798	0.0539	1.26e-11	8974	90274840	TRUE	reported	EU2AVM	90274840	90274840	2	TRUE	NA	NA	0.00508794	8974	2.19e-05	80610	TRUE
115	rs2904602	A	G	A	G	-0.625	0.0201	0.1165	0.1122	FALSE	FALSE	FALSE	ebi-a-GCST005647	6	31451847	0.0216	80610	0.3521	Amyotrophic lateral sclerosis || id:ebi-a-GCST005647	Amyotrophic lateral sclerosis	Amyotrophic lateral sclerosis || ||	TRUE	igd	NA	NA	NA	NA	NA	NA	NA	5890	0.0196	1e-200	11791	90274840	TRUE	reported	EU2AVM	90274840	90274840	2	TRUE	NA	NA	0.0794036	11791	1.07e-05	80610	TRUE
116	rs3132518	C	G	C	G	0.1071	0.0234	0.4015	0.4036	FALSE	TRUE	FALSE	ebi-a-GCST005647	6	31140169	0.0139	80610	0.0914303	Amyotrophic lateral sclerosis || id:ebi-a-GCST005647	Amyotrophic lateral sclerosis	Amyotrophic lateral sclerosis || ||	TRUE	igd	NA	NA	NA	NA	NA	NA	NA	2198	0.0133	8.1e-16	11791	90274840	TRUE	reported	EU2AVM	90274840	90274840	2	TRUE	NA	NA	0.00547037	11791	3.52e-05	80610	TRUE
117	rs62408379	T	C	T	C	-0.1523	0.014	0.0771	0.0836	FALSE	FALSE	FALSE	ebi-a-GCST005647	6	28722076	0.025	80610	0.5755	Amyotrophic lateral sclerosis || id:ebi-a-GCST005647	Amyotrophic lateral sclerosis	Amyotrophic lateral sclerosis || ||	TRUE	igd	NA	NA	NA	NA	NA	NA	NA	32	0.0248	8.19e-10	11774	90274840	TRUE	reported	EU2AVM	90274840	90274840	2	TRUE	NA	NA	0.00319343	11774	3.89e-06	80610	TRUE
118	rs7310615	C	G	C	G	0.1356	-0.0447	0.4758	0.4866	FALSE	TRUE	TRUE	ebi-a-GCST005647	12	111865049	0.0138	80610	0.00121599	Amyotrophic lateral sclerosis || id:ebi-a-GCST005647	Amyotrophic lateral sclerosis	Amyotrophic lateral sclerosis || ||	TRUE	igd	NA	NA	NA	NA	NA	NA	NA	8085	0.0134	4.53e-24	11344	90274840	TRUE	reported	EU2AVM	90274840	90274840	2	FALSE	NA	NA	0.00894781	11344	0.000130143	80610	TRUE
119	rs73390248	T	C	T	C	-0.2269	0.0484	0.1027	0.1045	FALSE	FALSE	FALSE	ebi-a-GCST005647	6	31329834	0.0224	80610	0.03046	Amyotrophic lateral sclerosis || id:ebi-a-GCST005647	Amyotrophic lateral sclerosis	Amyotrophic lateral sclerosis || ||	TRUE	igd	NA	NA	NA	NA	NA	NA	NA	4746	0.0223	2.57e-24	11792	90274840	TRUE	reported	EU2AVM	90274840	90274840	2	TRUE	NA	NA	0.0087046	11792	5.79e-05	80610	TRUE
120	rs78477739	T	C	T	C	0.1462	0.0075	0.7457	0.8435	FALSE	FALSE	FALSE	ebi-a-GCST005647	6	32457465	0.0293	80610	0.798	Amyotrophic lateral sclerosis || id:ebi-a-GCST005647	Amyotrophic lateral sclerosis	Amyotrophic lateral sclerosis || ||	TRUE	igd	TRUE	rs78477739	rs148333241	C	T	C	T	7157	0.0285	2.9e-07	6057	90274840	TRUE	reported	EU2AVM	90274840	90274840	2	TRUE	NA	NA	0.0043272	6057	8.13e-07	80610	TRUE
121	rs1034059	A	G	A	G	0.076	-0.0034	0.6981	0.7076	FALSE	FALSE	FALSE	ebi-a-GCST005647	6	158193698	0.0173	80610	0.846	Amyotrophic lateral sclerosis || id:ebi-a-GCST005647	Amyotrophic lateral sclerosis	Amyotrophic lateral sclerosis || ||	TRUE	igd	NA	NA	NA	NA	NA	NA	NA	2	0.0145	1.59e-07	14288	90274834	TRUE	reported	FylY98	90274834	90274834	2	TRUE	NA	NA	0.00191931	14288	4.79e-07	80610	TRUE
122	rs12531843	C	G	C	G	-0.1286	0.0003	0.9177	0.9197	FALSE	TRUE	FALSE	ebi-a-GCST005647	7	14143486	0.0279	80610	0.9902	Amyotrophic lateral sclerosis || id:ebi-a-GCST005647	Amyotrophic lateral sclerosis	Amyotrophic lateral sclerosis || ||	TRUE	igd	NA	NA	NA	NA	NA	NA	NA	3	0.0243	1.21e-07	12404	90274834	TRUE	reported	FylY98	90274834	90274834	2	TRUE	NA	NA	0.00225319	12404	1.43e-09	80610	TRUE
123	rs182274799	A	G	A	G	0.1565	0.0188	0.0646	0.0735	FALSE	FALSE	FALSE	ebi-a-GCST005647	11	10358788	0.0269	80610	0.484299	Amyotrophic lateral sclerosis || id:ebi-a-GCST005647	Amyotrophic lateral sclerosis	Amyotrophic lateral sclerosis || ||	TRUE	igd	NA	NA	NA	NA	NA	NA	NA	2	0.031	4.46e-07	9461	90274828	TRUE	reported	NtVxxV	90274828	90274828	2	TRUE	NA	NA	0.00268715	9461	6.06e-06	80610	TRUE
124	rs111865607	T	C	T	C	-0.1077	-0.0145	0.2079	0.22	FALSE	FALSE	FALSE	ebi-a-GCST005647	14	88422929	0.0295	80610	0.6234	Amyotrophic lateral sclerosis || id:ebi-a-GCST005647	Amyotrophic lateral sclerosis	Amyotrophic lateral sclerosis || ||	TRUE	igd	NA	NA	NA	NA	NA	NA	NA	249	0.0178	1.44e-09	10894	90274831	TRUE	reported	o9UFHR	90274831	90274831	2	TRUE	NA	NA	0.00334986	10894	3e-06	80610	TRUE
125	rs2285179	A	G	A	G	-0.0663	0.0062	0.5586	0.5357	FALSE	FALSE	FALSE	ebi-a-GCST005647	22	38211954	0.0138	80610	0.6519	Amyotrophic lateral sclerosis || id:ebi-a-GCST005647	Amyotrophic lateral sclerosis	Amyotrophic lateral sclerosis || ||	TRUE	igd	NA	NA	NA	NA	NA	NA	NA	604	0.0122	5.5e-08	14288	90274831	TRUE	reported	o9UFHR	90274831	90274831	2	TRUE	NA	NA	0.002063	14288	2.5e-06	80610	TRUE
126	rs2511241	T	C	T	C	0.177	-0.0114	0.9163	0.9169	FALSE	FALSE	FALSE	ebi-a-GCST005647	11	72945341	0.028	80610	0.684101	Amyotrophic lateral sclerosis || id:ebi-a-GCST005647	Amyotrophic lateral sclerosis	Amyotrophic lateral sclerosis || ||	TRUE	igd	NA	NA	NA	NA	NA	NA	NA	222	0.0236	6.38e-14	13668	90274831	TRUE	reported	o9UFHR	90274831	90274831	2	TRUE	NA	NA	0.00409918	13668	2.06e-06	80610	TRUE
127	rs3859189	A	G	A	G	0.1101	-0.0041	0.5367	0.5084	FALSE	FALSE	FALSE	ebi-a-GCST005647	17	38137033	0.0137	80610	0.762901	Amyotrophic lateral sclerosis || id:ebi-a-GCST005647	Amyotrophic lateral sclerosis	Amyotrophic lateral sclerosis || ||	TRUE	igd	NA	NA	NA	NA	NA	NA	NA	420	0.0117	4.95e-21	14729	90274831	TRUE	reported	o9UFHR	90274831	90274831	2	TRUE	NA	NA	0.00597703	14729	1.11e-06	80610	TRUE
128	rs653178	T	C	T	C	-0.0728	0.0477	0.5224	0.5146	FALSE	FALSE	FALSE	ebi-a-GCST005647	12	112007756	0.0137	80610	0.0005175	Amyotrophic lateral sclerosis || id:ebi-a-GCST005647	Amyotrophic lateral sclerosis	Amyotrophic lateral sclerosis || ||	TRUE	igd	NA	NA	NA	NA	NA	NA	NA	232	0.0132	3.48e-08	11785	90274831	TRUE	reported	o9UFHR	90274831	90274831	2	TRUE	NA	NA	0.00257478	11785	0.000150367	80610	TRUE
129	rs7432752	A	G	A	G	0.0882	0.0195	0.5176	0.5284	FALSE	FALSE	FALSE	ebi-a-GCST005647	3	155531845	0.0333	80610	0.558399	Amyotrophic lateral sclerosis || id:ebi-a-GCST005647	Amyotrophic lateral sclerosis	Amyotrophic lateral sclerosis || ||	TRUE	igd	NA	NA	NA	NA	NA	NA	NA	1	0.0167	1.28e-07	10894	90274831	TRUE	reported	o9UFHR	90274831	90274831	2	TRUE	NA	NA	0.00255438	10894	4.25e-06	80610	TRUE
130	rs74472890	T	C	T	C	-0.1426	-0.0337	0.9471	0.9533	FALSE	FALSE	FALSE	ebi-a-GCST005647	11	72946279	0.0412	80610	0.4137	Amyotrophic lateral sclerosis || id:ebi-a-GCST005647	Amyotrophic lateral sclerosis	Amyotrophic lateral sclerosis || ||	TRUE	igd	NA	NA	NA	NA	NA	NA	NA	224	0.0281	3.88e-07	14735	90274831	TRUE	reported	o9UFHR	90274831	90274831	2	TRUE	NA	NA	0.00174493	14735	8.3e-06	80610	TRUE
131	rs9264931	T	C	T	C	-0.1048	-0.0124	0.8812	0.8746	FALSE	FALSE	FALSE	ebi-a-GCST005647	6	31274196	0.0209	80610	0.551099	Amyotrophic lateral sclerosis || id:ebi-a-GCST005647	Amyotrophic lateral sclerosis	Amyotrophic lateral sclerosis || ||	TRUE	igd	NA	NA	NA	NA	NA	NA	NA	167	0.0191	4.09e-08	14736	90274831	TRUE	reported	o9UFHR	90274831	90274831	2	TRUE	NA	NA	0.00203915	14736	4.37e-06	80610	TRUE
132	rs10901252	C	G	C	G	0.2068	-0.0635	0.0963	0.077	FALSE	TRUE	FALSE	ebi-a-GCST005647	9	136128000	0.0262	80610	0.0152598	Amyotrophic lateral sclerosis || id:ebi-a-GCST005647	Amyotrophic lateral sclerosis	Amyotrophic lateral sclerosis || ||	TRUE	igd	NA	NA	NA	NA	NA	NA	NA	163	0.0213	2.76e-22	11779	90274820	TRUE	reported	PAoWMk	90274820	90274820	2	TRUE	NA	NA	0.00794045	11779	7.29e-05	80610	TRUE
133	rs2289779	T	G	T	G	0.0788	-0.0017	0.5419	0.5425	FALSE	FALSE	FALSE	ebi-a-GCST005647	5	38527228	0.0142	80610	0.9063	Amyotrophic lateral sclerosis || id:ebi-a-GCST005647	Amyotrophic lateral sclerosis	Amyotrophic lateral sclerosis || ||	TRUE	igd	NA	NA	NA	NA	NA	NA	NA	13	0.0134	4.09e-09	11336	90274820	TRUE	reported	PAoWMk	90274820	90274820	2	TRUE	NA	NA	0.00304184	11336	1.78e-07	80610	TRUE
134	rs4937122	T	G	T	G	0.1262	0.0461	0.9129	0.921	FALSE	FALSE	FALSE	ebi-a-GCST005647	11	126228659	0.0258	80610	0.0743807	Amyotrophic lateral sclerosis || id:ebi-a-GCST005647	Amyotrophic lateral sclerosis	Amyotrophic lateral sclerosis || ||	TRUE	igd	NA	NA	NA	NA	NA	NA	NA	466	0.0248	3.61e-07	11336	90274820	TRUE	reported	PAoWMk	90274820	90274820	2	TRUE	NA	NA	0.00227951	11336	3.96e-05	80610	TRUE
135	rs10142466	A	G	A	G	0.057	-0.0095	0.49	0.4928	FALSE	FALSE	FALSE	ebi-a-GCST005647	14	69271784	0.0136	80610	0.4833	Amyotrophic lateral sclerosis || id:ebi-a-GCST005647	Amyotrophic lateral sclerosis	Amyotrophic lateral sclerosis || ||	TRUE	igd	NA	NA	NA	NA	NA	NA	NA	416	0.0109	1.7e-07	14721	90274830	TRUE	reported	tTlhSF	90274830	90274830	2	TRUE	NA	NA	0.00185444	14721	6.05e-06	80610	TRUE
136	rs112635299	T	G	T	G	0.2618	-0.0445	0.0205	0.0179	FALSE	FALSE	FALSE	ebi-a-GCST005647	14	94838142	0.0572	80610	0.4365	Amyotrophic lateral sclerosis || id:ebi-a-GCST005647	Amyotrophic lateral sclerosis	Amyotrophic lateral sclerosis || ||	TRUE	igd	NA	NA	NA	NA	NA	NA	NA	425	0.0433	1.48e-09	14733	90274830	TRUE	reported	tTlhSF	90274830	90274830	2	TRUE	NA	NA	0.00247545	14733	7.51e-06	80610	TRUE
137	rs114165349	C	G	C	G	-0.1948	-0.0566	0.0337	0.0249	FALSE	TRUE	FALSE	ebi-a-GCST005647	1	27021913	0.0481	80610	0.2388	Amyotrophic lateral sclerosis || id:ebi-a-GCST005647	Amyotrophic lateral sclerosis	Amyotrophic lateral sclerosis || ||	TRUE	igd	NA	NA	NA	NA	NA	NA	NA	2	0.034	1.01e-08	14727	90274830	TRUE	reported	tTlhSF	90274830	90274830	2	TRUE	NA	NA	0.00222432	14727	1.72e-05	80610	TRUE
138	rs1230164	C	G	C	G	-0.0671	-0.0023	0.7288	0.713	FALSE	TRUE	FALSE	ebi-a-GCST005647	4	99986023	0.0151	80610	0.8777	Amyotrophic lateral sclerosis || id:ebi-a-GCST005647	Amyotrophic lateral sclerosis	Amyotrophic lateral sclerosis || ||	TRUE	igd	NA	NA	NA	NA	NA	NA	NA	7	0.0129	1.98e-07	14285	90274830	TRUE	reported	tTlhSF	90274830	90274830	2	TRUE	NA	NA	0.00189071	14285	2.88e-07	80610	TRUE
139	rs1437633	A	C	A	C	-0.079	-0.0134	0.2072	0.2108	FALSE	FALSE	FALSE	ebi-a-GCST005647	11	16272199	0.017	80610	0.4304	Amyotrophic lateral sclerosis || id:ebi-a-GCST005647	Amyotrophic lateral sclerosis	Amyotrophic lateral sclerosis || ||	TRUE	igd	NA	NA	NA	NA	NA	NA	NA	413	0.0147	7.69e-08	12851	90274830	TRUE	reported	tTlhSF	90274830	90274830	2	TRUE	NA	NA	0.00224272	12851	7.71e-06	80610	TRUE
140	rs1493936	T	C	T	C	-0.258	0.1578	0.0224	0.0132	FALSE	FALSE	FALSE	ebi-a-GCST005647	8	119777640	0.0737	80610	0.03234	Amyotrophic lateral sclerosis || id:ebi-a-GCST005647	Amyotrophic lateral sclerosis	Amyotrophic lateral sclerosis || ||	TRUE	igd	NA	NA	NA	NA	NA	NA	NA	77	0.046	2.04e-08	14246	90274830	TRUE	reported	tTlhSF	90274830	90274830	2	TRUE	NA	NA	0.0022036	14246	5.69e-05	80610	TRUE
141	rs17600346	T	C	T	C	-0.1569	0.0362	0.9631	0.9572	FALSE	FALSE	FALSE	ebi-a-GCST005647	3	172223982	0.0353	80610	0.3056	Amyotrophic lateral sclerosis || id:ebi-a-GCST005647	Amyotrophic lateral sclerosis	Amyotrophic lateral sclerosis || ||	TRUE	igd	NA	NA	NA	NA	NA	NA	NA	5	0.0299	1.54e-07	14723	90274830	TRUE	reported	tTlhSF	90274830	90274830	2	TRUE	NA	NA	0.00186704	14723	1.3e-05	80610	TRUE
142	rs2247769	T	C	T	C	-0.1705	0.0021	0.5577	0.54	FALSE	FALSE	FALSE	ebi-a-GCST005647	8	120081031	0.014	80610	0.8791	Amyotrophic lateral sclerosis || id:ebi-a-GCST005647	Amyotrophic lateral sclerosis	Amyotrophic lateral sclerosis || ||	TRUE	igd	NA	NA	NA	NA	NA	NA	NA	165	0.0114	1.42e-50	14285	90274830	TRUE	reported	tTlhSF	90274830	90274830	2	TRUE	NA	NA	0.0154195	14285	2.79e-07	80610	TRUE
143	rs271665	T	C	T	C	-0.0672	0.0075	0.748	0.7717	FALSE	FALSE	FALSE	ebi-a-GCST005647	17	47938521	0.017	80610	0.6583	Amyotrophic lateral sclerosis || id:ebi-a-GCST005647	Amyotrophic lateral sclerosis	Amyotrophic lateral sclerosis || ||	TRUE	igd	NA	NA	NA	NA	NA	NA	NA	617	0.0129	1.9e-07	14710	90274830	TRUE	reported	tTlhSF	90274830	90274830	2	TRUE	NA	NA	0.00184164	14710	2.41e-06	80610	TRUE
144	rs58792577	T	C	T	C	-0.0665	0.0279	0.6822	0.6822	FALSE	FALSE	FALSE	ebi-a-GCST005647	8	119805839	0.0147	80610	0.0574897	Amyotrophic lateral sclerosis || id:ebi-a-GCST005647	Amyotrophic lateral sclerosis	Amyotrophic lateral sclerosis || ||	TRUE	igd	NA	NA	NA	NA	NA	NA	NA	79	0.0119	2.29e-08	14724	90274830	TRUE	reported	tTlhSF	90274830	90274830	2	TRUE	NA	NA	0.00211671	14724	4.47e-05	80610	TRUE
145	rs704	A	G	A	G	-0.1404	0.0212	0.4726	0.4929	FALSE	FALSE	FALSE	ebi-a-GCST005647	17	26694861	0.0138	80610	0.124	Amyotrophic lateral sclerosis || id:ebi-a-GCST005647	Amyotrophic lateral sclerosis	Amyotrophic lateral sclerosis || ||	TRUE	igd	NA	NA	NA	NA	NA	NA	NA	499	0.0111	1.14e-36	14733	90274830	TRUE	reported	tTlhSF	90274830	90274830	2	TRUE	NA	NA	0.010744	14733	2.93e-05	80610	TRUE
146	rs9643126	C	G	C	G	0.0837	0.0156	0.4689	0.4033	FALSE	TRUE	TRUE	ebi-a-GCST005647	8	119443927	0.0265	80610	0.5569	Amyotrophic lateral sclerosis || id:ebi-a-GCST005647	Amyotrophic lateral sclerosis	Amyotrophic lateral sclerosis || ||	TRUE	igd	NA	NA	NA	NA	NA	NA	NA	36	0.0146	9.87e-09	10893	90274830	TRUE	reported	tTlhSF	90274830	90274830	2	FALSE	NA	NA	0.00300863	10893	4.3e-06	80610	TRUE
147	rs112665079	T	C	T	C	0.8932	0.0687	0.051	0.0524	FALSE	FALSE	FALSE	ebi-a-GCST005647	20	43120683	0.0328	80610	0.0361302	Amyotrophic lateral sclerosis || id:ebi-a-GCST005647	Amyotrophic lateral sclerosis	Amyotrophic lateral sclerosis || ||	TRUE	igd	NA	NA	NA	NA	NA	NA	NA	100	0.026	1e-200	14720	90274759	TRUE	reported	zbyXYr	90274759	90274759	2	TRUE	NA	NA	0.074234	14720	5.44e-05	80610	TRUE
148	rs138960575	A	G	A	G	0.2878	-0.101	0.9797	0.9815	FALSE	FALSE	FALSE	ebi-a-GCST005647	20	43240490	0.0646	80610	0.1179	Amyotrophic lateral sclerosis || id:ebi-a-GCST005647	Amyotrophic lateral sclerosis	Amyotrophic lateral sclerosis || ||	TRUE	igd	NA	NA	NA	NA	NA	NA	NA	221	0.0507	1.37e-08	14288	90274759	TRUE	reported	zbyXYr	90274759	90274759	2	TRUE	NA	NA	0.00225049	14288	3.03e-05	80610	TRUE
149	rs140060277	A	AT	A	AT	0.1547	0.0607	0.8827	0.8715	FALSE	FALSE	FALSE	ebi-a-GCST005647	20	43168393	0.0299	80610	0.0423497	Amyotrophic lateral sclerosis || id:ebi-a-GCST005647	Amyotrophic lateral sclerosis	Amyotrophic lateral sclerosis || ||	TRUE	igd	NA	NA	NA	NA	NA	NA	NA	158	0.0243	1.94e-10	10407	90274759	TRUE	reported	zbyXYr	90274759	90274759	2	TRUE	NA	NA	0.00388005	10407	5.11e-05	80610	TRUE
150	rs147706532	A	G	A	G	-0.1816	0.0231	0.0369	0.036	FALSE	FALSE	FALSE	ebi-a-GCST005647	20	43086107	0.0453	80610	0.6111	Amyotrophic lateral sclerosis || id:ebi-a-GCST005647	Amyotrophic lateral sclerosis	Amyotrophic lateral sclerosis || ||	TRUE	igd	NA	NA	NA	NA	NA	NA	NA	66	0.034	9.23e-08	14714	90274759	TRUE	reported	zbyXYr	90274759	90274759	2	TRUE	NA	NA	0.00193536	14714	3.23e-06	80610	TRUE
151	rs36216718	T	C	T	C	-0.1817	-0.0738	0.0552	0.0528	FALSE	FALSE	FALSE	ebi-a-GCST005647	20	43280349	0.0567	80610	0.1928	Amyotrophic lateral sclerosis || id:ebi-a-GCST005647	Amyotrophic lateral sclerosis	Amyotrophic lateral sclerosis || ||	TRUE	igd	NA	NA	NA	NA	NA	NA	NA	287	0.027	1.7e-11	14066	90274759	TRUE	reported	zbyXYr	90274759	90274759	2	TRUE	NA	NA	0.0032098	14066	2.1e-05	80610	TRUE
152	rs6017383	T	C	T	C	-0.1776	-0.0124	0.7625	0.76	FALSE	FALSE	FALSE	ebi-a-GCST005647	20	43298501	0.0178	80610	0.4887	Amyotrophic lateral sclerosis || id:ebi-a-GCST005647	Amyotrophic lateral sclerosis	Amyotrophic lateral sclerosis || ||	TRUE	igd	NA	NA	NA	NA	NA	NA	NA	327	0.0141	2.23e-36	14715	90274759	TRUE	reported	zbyXYr	90274759	90274759	2	TRUE	NA	NA	0.0106681	14715	6.02e-06	80610	TRUE
153	rs6130598	A	G	A	G	0.0771	0.0236	0.2279	0.2275	FALSE	FALSE	FALSE	ebi-a-GCST005647	20	42994389	0.0167	80610	0.1593	Amyotrophic lateral sclerosis || id:ebi-a-GCST005647	Amyotrophic lateral sclerosis	Amyotrophic lateral sclerosis || ||	TRUE	igd	NA	NA	NA	NA	NA	NA	NA	26	0.0142	5.65e-08	14288	90274759	TRUE	reported	zbyXYr	90274759	90274759	2	TRUE	NA	NA	0.00205933	14288	2.48e-05	80610	TRUE
154	rs80212763	T	C	T	C	0.9687	-0.0603	0.0189	0.0168	FALSE	FALSE	FALSE	ebi-a-GCST005647	20	43223930	0.0601	80610	0.3152	Amyotrophic lateral sclerosis || id:ebi-a-GCST005647	Amyotrophic lateral sclerosis	Amyotrophic lateral sclerosis || ||	TRUE	igd	NA	NA	NA	NA	NA	NA	NA	201	0.0448	1.1e-103	14249	90274759	TRUE	reported	zbyXYr	90274759	90274759	2	TRUE	NA	NA	0.0317743	14249	1.25e-05	80610	TRUE
[truncated: 2 more columns]

## Sheet: S8
SNP details for the forward Mendelian randomization validation group (p<5e-6)
	SNP	effect_allele.exposure	other_allele.exposure	effect_allele.outcome	other_allele.outcome	beta.exposure	beta.outcome	eaf.exposure	eaf.outcome	remove	palindromic	ambiguous	id.outcome	chr	pos	se.outcome	samplesize.outcome	pval.outcome	outcome	originalname.outcome	outcome.deprecated	mr_keep.outcome	data_source.outcome	proxy.outcome	target_snp.outcome	proxy_snp.outcome	target_a1.outcome	target_a2.outcome	proxy_a1.outcome	proxy_a2.outcome	exposure	V1	se.exposure	pval.exposure	samplesize.exposure	data_source.exposure	mr_keep.exposure	pval_origin.exposure	id.exposure	exposure.1	action	mr_keep	units.outcome	units.exposure	rsq.exposure	effective_n.exposure	rsq.outcome	effective_n.outcome	steiger_dir
1	rs10207134	T	C	T	C	-0.0996	0.0432	0.326	NA	FALSE	FALSE	FALSE	ebi-a-GCST004692	2	228661828	0.0189	36052	0.02231	Amyotrophic lateral sclerosis || id:ebi-a-GCST004692	Amyotrophic lateral sclerosis	Amyotrophic lateral sclerosis || ||	TRUE	igd	NA	NA	NA	NA	NA	NA	NA	90274766	90	0.0128	7.18e-15	14287	90274766	TRUE	reported	7TARFz	90274766	2	TRUE	NA	NA	0.00422067	14287	0.000144902	36052	TRUE
2	rs10837780	T	C	T	C	0.1191	-0.0635	0.9413	NA	FALSE	FALSE	FALSE	ebi-a-GCST004692	11	42142787	0.0365	36052	0.0816601	Amyotrophic lateral sclerosis || id:ebi-a-GCST004692	Amyotrophic lateral sclerosis	Amyotrophic lateral sclerosis || ||	TRUE	igd	NA	NA	NA	NA	NA	NA	NA	90274766	182	0.026	4.63e-06	14288	90274766	TRUE	reported	7TARFz	90274766	2	TRUE	NA	NA	0.00146666	14288	8.39e-05	36052	TRUE
3	rs111674022	T	C	T	C	-0.0953	-0.0011	0.0967	NA	FALSE	FALSE	FALSE	ebi-a-GCST004692	1	238606022	0.0338	36052	0.973	Amyotrophic lateral sclerosis || id:ebi-a-GCST004692	Amyotrophic lateral sclerosis	Amyotrophic lateral sclerosis || ||	TRUE	igd	NA	NA	NA	NA	NA	NA	NA	90274766	2	0.0208	4.61e-06	14288	90274766	TRUE	reported	7TARFz	90274766	2	TRUE	NA	NA	0.00146727	14288	2.94e-08	36052	TRUE
4	rs11242693	T	C	T	C	0.0637	0.0318	0.3674	NA	FALSE	FALSE	FALSE	ebi-a-GCST004692	6	1448190	0.0189	36052	0.0930508	Amyotrophic lateral sclerosis || id:ebi-a-GCST004692	Amyotrophic lateral sclerosis	Amyotrophic lateral sclerosis || ||	TRUE	igd	NA	NA	NA	NA	NA	NA	NA	90274766	99	0.0135	2.38e-06	12404	90274766	TRUE	reported	7TARFz	90274766	2	TRUE	NA	NA	0.00179201	12404	7.85e-05	36052	TRUE
5	rs1129474	T	C	T	C	0.0573	0.0216	0.5396	NA	FALSE	FALSE	FALSE	ebi-a-GCST004692	8	22584718	0.0182	36052	0.2375	Amyotrophic lateral sclerosis || id:ebi-a-GCST004692	Amyotrophic lateral sclerosis	Amyotrophic lateral sclerosis || ||	TRUE	igd	NA	NA	NA	NA	NA	NA	NA	90274766	174	0.012	1.8e-06	14288	90274766	TRUE	reported	7TARFz	90274766	2	TRUE	NA	NA	0.00159347	14288	3.91e-05	36052	TRUE
6	rs11582772	T	C	T	C	0.2585	-0.1149	0.9859	NA	FALSE	FALSE	FALSE	ebi-a-GCST004692	1	32260562	0.0886	36052	0.1943	Amyotrophic lateral sclerosis || id:ebi-a-GCST004692	Amyotrophic lateral sclerosis	Amyotrophic lateral sclerosis || ||	TRUE	igd	NA	NA	NA	NA	NA	NA	NA	90274766	1	0.0548	2.39e-06	14243	90274766	TRUE	reported	7TARFz	90274766	2	TRUE	NA	NA	0.00156006	14243	4.66e-05	36052	TRUE
7	rs117753190	C	G	C	G	-0.185	0.0032	0.9688	NA	FALSE	TRUE	TRUE	ebi-a-GCST004692	17	67136325	0.0519	36052	0.9504	Amyotrophic lateral sclerosis || id:ebi-a-GCST004692	Amyotrophic lateral sclerosis	Amyotrophic lateral sclerosis || ||	TRUE	igd	NA	NA	NA	NA	NA	NA	NA	90274766	197	0.0359	2.56e-07	14243	90274766	TRUE	reported	7TARFz	90274766	2	FALSE	NA	NA	0.00186125	14243	1.05e-07	36052	TRUE
8	rs117900576	C	G	C	G	-0.2256	-0.059	0.9694	NA	FALSE	TRUE	TRUE	ebi-a-GCST004692	17	72761195	0.0645	36052	0.36	Amyotrophic lateral sclerosis || id:ebi-a-GCST004692	Amyotrophic lateral sclerosis	Amyotrophic lateral sclerosis || ||	TRUE	igd	NA	NA	NA	NA	NA	NA	NA	90274766	201	0.0429	1.45e-07	13224	90274766	TRUE	reported	7TARFz	90274766	2	FALSE	NA	NA	0.00208718	13224	2.32e-05	36052	TRUE
9	rs13049624	A	G	A	G	-0.1315	-0.0849	0.9476	NA	FALSE	FALSE	FALSE	ebi-a-GCST004692	21	44005002	0.0374	36052	0.0233297	Amyotrophic lateral sclerosis || id:ebi-a-GCST004692	Amyotrophic lateral sclerosis	Amyotrophic lateral sclerosis || ||	TRUE	igd	NA	NA	NA	NA	NA	NA	NA	90274766	206	0.0276	1.89e-06	14288	90274766	TRUE	reported	7TARFz	90274766	2	TRUE	NA	NA	0.00158647	14288	0.000142924	36052	TRUE
10	rs151092565	T	C	T	C	-0.1512	-0.0357	0.0376	NA	FALSE	FALSE	FALSE	ebi-a-GCST004692	14	94625543	0.0454	36052	0.4312	Amyotrophic lateral sclerosis || id:ebi-a-GCST004692	Amyotrophic lateral sclerosis	Amyotrophic lateral sclerosis || ||	TRUE	igd	NA	NA	NA	NA	NA	NA	NA	90274766	187	0.0328	4.03e-06	14728	90274766	TRUE	reported	7TARFz	90274766	2	TRUE	NA	NA	0.00144094	14728	1.72e-05	36052	TRUE
11	rs2003431	A	T	A	T	-0.1602	0.0646	0.0632	NA	FALSE	TRUE	TRUE	ebi-a-GCST004692	14	106782532	0.0625	36052	0.3008	Amyotrophic lateral sclerosis || id:ebi-a-GCST004692	Amyotrophic lateral sclerosis	Amyotrophic lateral sclerosis || ||	TRUE	igd	NA	NA	NA	NA	NA	NA	NA	90274766	188	0.0344	3.21e-06	9786	90274766	TRUE	reported	7TARFz	90274766	2	FALSE	NA	NA	0.00221172	9786	2.96e-05	36052	TRUE
12	rs2796032	T	C	T	C	0.0636	0.0332	0.3159	NA	FALSE	FALSE	FALSE	ebi-a-GCST004692	9	115519904	0.0188	36052	0.0777893	Amyotrophic lateral sclerosis || id:ebi-a-GCST004692	Amyotrophic lateral sclerosis	Amyotrophic lateral sclerosis || ||	TRUE	igd	NA	NA	NA	NA	NA	NA	NA	90274766	176	0.0127	5.5e-07	14718	90274766	TRUE	reported	7TARFz	90274766	2	TRUE	NA	NA	0.00170129	14718	8.65e-05	36052	TRUE
13	rs35833676	T	C	T	C	0.0804	-0.0207	0.1452	NA	FALSE	FALSE	FALSE	ebi-a-GCST004692	21	32961256	0.0246	36052	0.3998	Amyotrophic lateral sclerosis || id:ebi-a-GCST004692	Amyotrophic lateral sclerosis	Amyotrophic lateral sclerosis || ||	TRUE	igd	NA	NA	NA	NA	NA	NA	NA	90274766	205	0.0166	1.28e-06	14732	90274766	TRUE	reported	7TARFz	90274766	2	TRUE	NA	NA	0.00159002	14732	1.96e-05	36052	TRUE
14	rs41302923	A	G	A	G	0.1939	0.0696	0.9774	NA	FALSE	FALSE	FALSE	ebi-a-GCST004692	10	127693479	0.0613	36052	0.2564	Amyotrophic lateral sclerosis || id:ebi-a-GCST004692	Amyotrophic lateral sclerosis	Amyotrophic lateral sclerosis || ||	TRUE	igd	NA	NA	NA	NA	NA	NA	NA	90274766	180	0.0414	2.82e-06	14726	90274766	TRUE	reported	7TARFz	90274766	2	TRUE	NA	NA	0.00148759	14726	3.58e-05	36052	TRUE
15	rs4981022	A	G	A	G	0.0635	0.006	0.6933	NA	FALSE	FALSE	FALSE	ebi-a-GCST004692	12	104149874	0.0191	36052	0.7541	Amyotrophic lateral sclerosis || id:ebi-a-GCST004692	Amyotrophic lateral sclerosis	Amyotrophic lateral sclerosis || ||	TRUE	igd	NA	NA	NA	NA	NA	NA	NA	90274766	186	0.0128	7.02e-07	14721	90274766	TRUE	reported	7TARFz	90274766	2	TRUE	NA	NA	0.00166926	14721	2.74e-06	36052	TRUE
16	rs5769672	T	G	T	G	-0.1184	0.0105	0.9406	NA	FALSE	FALSE	FALSE	ebi-a-GCST004692	22	49877754	0.0405	36052	0.7944	Amyotrophic lateral sclerosis || id:ebi-a-GCST004692	Amyotrophic lateral sclerosis	Amyotrophic lateral sclerosis || ||	TRUE	igd	NA	NA	NA	NA	NA	NA	NA	90274766	207	0.0257	4.09e-06	14732	90274766	TRUE	reported	7TARFz	90274766	2	TRUE	NA	NA	0.00143883	14732	1.86e-06	36052	TRUE
17	rs6420556	T	C	T	C	-0.0736	-0.0114	0.1755	NA	FALSE	FALSE	FALSE	ebi-a-GCST004692	18	56487606	0.0237	36052	0.6305	Amyotrophic lateral sclerosis || id:ebi-a-GCST004692	Amyotrophic lateral sclerosis	Amyotrophic lateral sclerosis || ||	TRUE	igd	NA	NA	NA	NA	NA	NA	NA	90274766	202	0.0158	3.19e-06	14288	90274766	TRUE	reported	7TARFz	90274766	2	TRUE	NA	NA	0.0015166	14288	6.42e-06	36052	TRUE
18	rs73072893	A	G	A	G	0.2057	-0.0369	0.9739	NA	FALSE	FALSE	FALSE	ebi-a-GCST004692	12	19657540	0.0565	36052	0.5139	Amyotrophic lateral sclerosis || id:ebi-a-GCST004692	Amyotrophic lateral sclerosis	Amyotrophic lateral sclerosis || ||	TRUE	igd	NA	NA	NA	NA	NA	NA	NA	90274766	184	0.0422	1.09e-06	13230	90274766	TRUE	reported	7TARFz	90274766	2	TRUE	NA	NA	0.00179296	13230	1.18e-05	36052	TRUE
19	rs742493	T	C	T	C	0.1459	0.0311	0.883	NA	FALSE	FALSE	FALSE	ebi-a-GCST004692	6	40998167	0.0277	36052	0.2617	Amyotrophic lateral sclerosis || id:ebi-a-GCST004692	Amyotrophic lateral sclerosis	Amyotrophic lateral sclerosis || ||	TRUE	igd	NA	NA	NA	NA	NA	NA	NA	90274766	147	0.0185	3.11e-15	14735	90274766	TRUE	reported	7TARFz	90274766	2	TRUE	NA	NA	0.00420384	14735	3.5e-05	36052	TRUE
20	rs9274623	T	G	T	G	-0.076	-0.039	0.215	NA	FALSE	FALSE	FALSE	ebi-a-GCST004692	6	32635998	0.0217	36052	0.0719598	Amyotrophic lateral sclerosis || id:ebi-a-GCST004692	Amyotrophic lateral sclerosis	Amyotrophic lateral sclerosis || ||	TRUE	igd	NA	NA	NA	NA	NA	NA	NA	90274766	139	0.0148	2.82e-07	14288	90274766	TRUE	reported	7TARFz	90274766	2	TRUE	NA	NA	0.00184243	14288	8.96e-05	36052	TRUE
21	rs112046281	A	G	A	G	-0.6167	0.1594	0.0161	NA	FALSE	FALSE	FALSE	ebi-a-GCST004692	6	31769614	0.0701	36052	0.02298	Amyotrophic lateral sclerosis || id:ebi-a-GCST004692	Amyotrophic lateral sclerosis	Amyotrophic lateral sclerosis || ||	TRUE	igd	NA	NA	NA	NA	NA	NA	NA	90274840	7242	0.0536	1.24e-30	11792	90274840	TRUE	reported	DRSw98	90274840	2	TRUE	NA	NA	0.0111034	11792	0.000143408	36052	TRUE
22	rs112317147	T	C	T	C	-0.1441	0.021	0.0534	NA	FALSE	FALSE	FALSE	ebi-a-GCST004692	2	119783156	0.0428	36052	0.624001	Amyotrophic lateral sclerosis || id:ebi-a-GCST004692	Amyotrophic lateral sclerosis	Amyotrophic lateral sclerosis || ||	TRUE	igd	NA	NA	NA	NA	NA	NA	NA	90274840	15	0.0309	3.11e-06	11344	90274840	TRUE	reported	DRSw98	90274840	2	TRUE	NA	NA	0.00191377	11344	6.68e-06	36052	TRUE
23	rs113244922	T	C	T	C	0.2324	0.0164	0.0237	NA	FALSE	FALSE	FALSE	ebi-a-GCST004692	4	35497008	0.0643	36052	0.799	Amyotrophic lateral sclerosis || id:ebi-a-GCST004692	Amyotrophic lateral sclerosis	Amyotrophic lateral sclerosis || ||	TRUE	igd	NA	NA	NA	NA	NA	NA	NA	90274840	40	0.0499	3.2e-06	10470	90274840	TRUE	reported	DRSw98	90274840	2	TRUE	NA	NA	0.0020678	10470	1.8e-06	36052	TRUE
24	rs114250919	T	C	T	C	0.2469	-0.0639	0.9743	NA	FALSE	FALSE	FALSE	ebi-a-GCST004692	5	21093728	0.0704	36052	0.3639	Amyotrophic lateral sclerosis || id:ebi-a-GCST004692	Amyotrophic lateral sclerosis	Amyotrophic lateral sclerosis || ||	TRUE	igd	NA	NA	NA	NA	NA	NA	NA	90274840	41	0.049	4.69e-07	11305	90274840	TRUE	reported	DRSw98	90274840	2	TRUE	NA	NA	0.00224121	11305	2.29e-05	36052	TRUE
25	rs116519179	A	G	A	G	-0.2639	-0.0306	0.0214	NA	FALSE	FALSE	FALSE	ebi-a-GCST004692	6	32159742	0.0683	36052	0.6541	Amyotrophic lateral sclerosis || id:ebi-a-GCST004692	Amyotrophic lateral sclerosis	Amyotrophic lateral sclerosis || ||	TRUE	igd	NA	NA	NA	NA	NA	NA	NA	90274840	7606	0.0534	7.73e-07	11344	90274840	TRUE	reported	DRSw98	90274840	2	TRUE	NA	NA	0.00214868	11344	5.57e-06	36052	TRUE
26	rs12214465	T	C	T	C	-0.1038	-0.0364	0.1133	NA	FALSE	FALSE	FALSE	ebi-a-GCST004692	6	27848251	0.0305	36052	0.2335	Amyotrophic lateral sclerosis || id:ebi-a-GCST004692	Amyotrophic lateral sclerosis	Amyotrophic lateral sclerosis || ||	TRUE	igd	NA	NA	NA	NA	NA	NA	NA	90274840	56	0.0219	2.14e-06	11776	90274840	TRUE	reported	DRSw98	90274840	2	TRUE	NA	NA	0.00190438	11776	3.95e-05	36052	TRUE
27	rs12743015	C	G	C	G	-0.1918	0.0081	0.029	NA	FALSE	TRUE	TRUE	ebi-a-GCST004692	1	110256931	0.055	36052	0.8828	Amyotrophic lateral sclerosis || id:ebi-a-GCST004692	Amyotrophic lateral sclerosis	Amyotrophic lateral sclerosis || ||	TRUE	igd	NA	NA	NA	NA	NA	NA	NA	90274840	11	0.0403	1.94e-06	11784	90274840	TRUE	reported	DRSw98	90274840	2	FALSE	NA	NA	0.00191882	11784	6.02e-07	36052	TRUE
28	rs12883833	A	G	A	G	-0.1252	-0.0118	0.0934	NA	FALSE	FALSE	FALSE	ebi-a-GCST004692	14	34898218	0.032	36052	0.7125	Amyotrophic lateral sclerosis || id:ebi-a-GCST004692	Amyotrophic lateral sclerosis	Amyotrophic lateral sclerosis || ||	TRUE	igd	TRUE	rs12883833	rs56728642	A	G	T	G	90274840	9668	0.0259	1.34e-06	9259	90274840	TRUE	reported	DRSw98	90274840	2	TRUE	NA	NA	0.00251793	9259	3.77e-06	36052	TRUE
29	rs139511528	A	G	A	G	-0.2485	-0.0748	0.0294	NA	FALSE	FALSE	FALSE	ebi-a-GCST004692	12	6429443	0.0716	36052	0.2959	Amyotrophic lateral sclerosis || id:ebi-a-GCST004692	Amyotrophic lateral sclerosis	Amyotrophic lateral sclerosis || ||	TRUE	igd	NA	NA	NA	NA	NA	NA	NA	90274840	9360	0.0521	1.85e-06	10280	90274840	TRUE	reported	DRSw98	90274840	2	TRUE	NA	NA	0.00220856	10280	3.03e-05	36052	TRUE
30	rs143019966	T	C	T	C	0.2122	0.0182	0.9751	NA	FALSE	FALSE	FALSE	ebi-a-GCST004692	13	47656376	0.0632	36052	0.7733	Amyotrophic lateral sclerosis || id:ebi-a-GCST004692	Amyotrophic lateral sclerosis	Amyotrophic lateral sclerosis || ||	TRUE	igd	NA	NA	NA	NA	NA	NA	NA	90274840	9666	0.0451	2.54e-06	10913	90274840	TRUE	reported	DRSw98	90274840	2	TRUE	NA	NA	0.00202485	10913	2.3e-06	36052	TRUE
31	rs147423408	A	G	A	G	0.1732	0.0528	0.0415	NA	FALSE	FALSE	FALSE	ebi-a-GCST004692	12	52132524	0.0452	36052	0.2425	Amyotrophic lateral sclerosis || id:ebi-a-GCST004692	Amyotrophic lateral sclerosis	Amyotrophic lateral sclerosis || ||	TRUE	igd	NA	NA	NA	NA	NA	NA	NA	90274840	9397	0.035	7.48e-07	11344	90274840	TRUE	reported	DRSw98	90274840	2	TRUE	NA	NA	0.00215444	11344	3.79e-05	36052	TRUE
32	rs151218088	T	C	T	C	-0.6677	-0.1537	0.014	NA	FALSE	FALSE	FALSE	ebi-a-GCST004692	6	30540762	0.1026	36052	0.1342	Amyotrophic lateral sclerosis || id:ebi-a-GCST004692	Amyotrophic lateral sclerosis	Amyotrophic lateral sclerosis || ||	TRUE	igd	NA	NA	NA	NA	NA	NA	NA	90274840	1330	0.0648	6.76e-25	10857	90274840	TRUE	reported	DRSw98	90274840	2	TRUE	NA	NA	0.00968625	10857	6.22e-05	36052	TRUE
33	rs185420195	T	C	T	C	0.2473	-0.1088	0.0255	NA	FALSE	FALSE	FALSE	ebi-a-GCST004692	6	30989631	0.0653	36052	0.0958694	Amyotrophic lateral sclerosis || id:ebi-a-GCST004692	Amyotrophic lateral sclerosis	Amyotrophic lateral sclerosis || ||	TRUE	igd	NA	NA	NA	NA	NA	NA	NA	90274840	1671	0.046	7.61e-08	11344	90274840	TRUE	reported	DRSw98	90274840	2	TRUE	NA	NA	0.00254178	11344	7.7e-05	36052	TRUE
34	rs200934644	T	TCAAA	T	TCAAA	0.3646	0.089	0.9523	NA	FALSE	FALSE	FALSE	ebi-a-GCST004692	6	31063595	0.0573	36052	0.1206	Amyotrophic lateral sclerosis || id:ebi-a-GCST004692	Amyotrophic lateral sclerosis	Amyotrophic lateral sclerosis || ||	TRUE	igd	NA	NA	NA	NA	NA	NA	NA	90274840	2126	0.0444	2.18e-16	7943	90274840	TRUE	reported	DRSw98	90274840	2	TRUE	NA	NA	0.00842015	7943	6.69e-05	36052	TRUE
35	rs2074475	T	C	T	C	0.2308	-0.0595	0.9618	NA	FALSE	FALSE	FALSE	ebi-a-GCST004692	6	30137890	0.0631	36052	0.346	Amyotrophic lateral sclerosis || id:ebi-a-GCST004692	Amyotrophic lateral sclerosis	Amyotrophic lateral sclerosis || ||	TRUE	igd	NA	NA	NA	NA	NA	NA	NA	90274840	1086	0.0421	4.2e-08	11792	90274840	TRUE	reported	DRSw98	90274840	2	TRUE	NA	NA	0.00254266	11792	2.47e-05	36052	TRUE
36	rs2364485	A	C	A	C	0.1759	-0.0371	0.1645	NA	FALSE	FALSE	FALSE	ebi-a-GCST004692	12	6514963	0.0246	36052	0.1321	Amyotrophic lateral sclerosis || id:ebi-a-GCST004692	Amyotrophic lateral sclerosis	Amyotrophic lateral sclerosis || ||	TRUE	igd	NA	NA	NA	NA	NA	NA	NA	90274840	9388	0.0189	1.32e-20	11344	90274840	TRUE	reported	DRSw98	90274840	2	TRUE	NA	NA	0.00757904	11344	6.31e-05	36052	TRUE
37	rs2523887	A	G	A	G	0.2057	0.0086	0.7362	NA	FALSE	FALSE	FALSE	ebi-a-GCST004692	6	31040725	0.0198	36052	0.6623	Amyotrophic lateral sclerosis || id:ebi-a-GCST004692	Amyotrophic lateral sclerosis	Amyotrophic lateral sclerosis || ||	TRUE	igd	NA	NA	NA	NA	NA	NA	NA	90274840	1978	0.0148	6.45e-44	11792	90274840	TRUE	reported	DRSw98	90274840	2	TRUE	NA	NA	0.0161203	11792	5.23e-06	36052	TRUE
38	rs28366157	A	G	A	G	-0.217	0.0185	0.9465	NA	FALSE	FALSE	FALSE	ebi-a-GCST004692	6	31672242	0.0405	36052	0.6475	Amyotrophic lateral sclerosis || id:ebi-a-GCST004692	Amyotrophic lateral sclerosis	Amyotrophic lateral sclerosis || ||	TRUE	igd	NA	NA	NA	NA	NA	NA	NA	90274840	7194	0.0313	4.12e-12	10918	90274840	TRUE	reported	DRSw98	90274840	2	TRUE	NA	NA	0.00438388	10918	5.79e-06	36052	TRUE
39	rs28700215	T	C	T	C	-0.0626	-0.0237	0.5824	NA	FALSE	FALSE	FALSE	ebi-a-GCST004692	15	100064767	0.018	36052	0.1877	Amyotrophic lateral sclerosis || id:ebi-a-GCST004692	Amyotrophic lateral sclerosis	Amyotrophic lateral sclerosis || ||	TRUE	igd	NA	NA	NA	NA	NA	NA	NA	90274840	9672	0.0136	4.17e-06	11344	90274840	TRUE	reported	DRSw98	90274840	2	TRUE	NA	NA	0.00186454	11344	4.81e-05	36052	TRUE
40	rs2894233	A	G	A	G	-0.3651	-0.1035	0.9705	NA	FALSE	FALSE	FALSE	ebi-a-GCST004692	6	32011678	0.0592	36052	0.0804804	Amyotrophic lateral sclerosis || id:ebi-a-GCST004692	Amyotrophic lateral sclerosis	Amyotrophic lateral sclerosis || ||	TRUE	igd	NA	NA	NA	NA	NA	NA	NA	90274840	7500	0.0539	1.26e-11	8974	90274840	TRUE	reported	DRSw98	90274840	2	TRUE	NA	NA	0.00508794	8974	8.48e-05	36052	TRUE
41	rs2904602	A	G	A	G	-0.625	0.0026	0.1165	NA	FALSE	FALSE	FALSE	ebi-a-GCST004692	6	31451847	0.0278	36052	0.926	Amyotrophic lateral sclerosis || id:ebi-a-GCST004692	Amyotrophic lateral sclerosis	Amyotrophic lateral sclerosis || ||	TRUE	igd	NA	NA	NA	NA	NA	NA	NA	90274840	6527	0.0196	1e-200	11791	90274840	TRUE	reported	DRSw98	90274840	2	TRUE	NA	NA	0.0794036	11791	2.43e-07	36052	TRUE
42	rs3132518	C	G	C	G	0.1071	0.0413	0.4015	NA	FALSE	TRUE	TRUE	ebi-a-GCST004692	6	31140169	0.0181	36052	0.0221401	Amyotrophic lateral sclerosis || id:ebi-a-GCST004692	Amyotrophic lateral sclerosis	Amyotrophic lateral sclerosis || ||	TRUE	igd	NA	NA	NA	NA	NA	NA	NA	90274840	2595	0.0133	8.1e-16	11791	90274840	TRUE	reported	DRSw98	90274840	2	FALSE	NA	NA	0.00547037	11791	0.000144403	36052	TRUE
43	rs35986022	A	G	A	G	0.1101	-0.0086	0.102	NA	FALSE	FALSE	FALSE	ebi-a-GCST004692	12	113315391	0.0329	36052	0.794301	Amyotrophic lateral sclerosis || id:ebi-a-GCST004692	Amyotrophic lateral sclerosis	Amyotrophic lateral sclerosis || ||	TRUE	igd	NA	NA	NA	NA	NA	NA	NA	90274840	9662	0.0235	2.8e-06	11344	90274840	TRUE	reported	DRSw98	90274840	2	TRUE	NA	NA	0.00193157	11344	1.9e-06	36052	TRUE
44	rs3789087	T	C	T	C	-0.0819	0.0633	0.1582	NA	FALSE	FALSE	FALSE	ebi-a-GCST004692	2	111791653	0.0241	36052	0.00859706	Amyotrophic lateral sclerosis || id:ebi-a-GCST004692	Amyotrophic lateral sclerosis	Amyotrophic lateral sclerosis || ||	TRUE	igd	NA	NA	NA	NA	NA	NA	NA	90274840	14	0.0179	4.75e-06	11788	90274840	TRUE	reported	DRSw98	90274840	2	TRUE	NA	NA	0.00177307	11788	0.000191331	36052	TRUE
45	rs55914821	A	G	A	G	0.0748	0.005	0.7583	NA	FALSE	FALSE	FALSE	ebi-a-GCST004692	17	65264208	0.0213	36052	0.8141	Amyotrophic lateral sclerosis || id:ebi-a-GCST004692	Amyotrophic lateral sclerosis	Amyotrophic lateral sclerosis || ||	TRUE	igd	NA	NA	NA	NA	NA	NA	NA	90274840	9680	0.0159	2.55e-06	11344	90274840	TRUE	reported	DRSw98	90274840	2	TRUE	NA	NA	0.00194748	11344	1.53e-06	36052	TRUE
46	rs62408379	T	C	T	C	-0.1523	-0.0137	0.0771	NA	FALSE	FALSE	FALSE	ebi-a-GCST004692	6	28722076	0.0329	36052	0.6767	Amyotrophic lateral sclerosis || id:ebi-a-GCST004692	Amyotrophic lateral sclerosis	Amyotrophic lateral sclerosis || ||	TRUE	igd	NA	NA	NA	NA	NA	NA	NA	90274840	105	0.0248	8.19e-10	11774	90274840	TRUE	reported	DRSw98	90274840	2	TRUE	NA	NA	0.00319343	11774	4.81e-06	36052	TRUE
47	rs7310615	C	G	C	G	0.1356	-0.0467	0.4758	NA	FALSE	TRUE	TRUE	ebi-a-GCST004692	12	111865049	0.0177	36052	0.00835103	Amyotrophic lateral sclerosis || id:ebi-a-GCST004692	Amyotrophic lateral sclerosis	Amyotrophic lateral sclerosis || ||	TRUE	igd	NA	NA	NA	NA	NA	NA	NA	90274840	9492	0.0134	4.53e-24	11344	90274840	TRUE	reported	DRSw98	90274840	2	FALSE	NA	NA	0.00894781	11344	0.000193063	36052	TRUE
48	rs73390248	T	C	T	C	-0.2269	0.0528	0.1027	NA	FALSE	FALSE	FALSE	ebi-a-GCST004692	6	31329834	0.0294	36052	0.0725404	Amyotrophic lateral sclerosis || id:ebi-a-GCST004692	Amyotrophic lateral sclerosis	Amyotrophic lateral sclerosis || ||	TRUE	igd	NA	NA	NA	NA	NA	NA	NA	90274840	5325	0.0223	2.57e-24	11792	90274840	TRUE	reported	DRSw98	90274840	2	TRUE	NA	NA	0.0087046	11792	8.95e-05	36052	TRUE
49	rs74363807	T	C	T	C	0.2496	-0.1208	0.0218	NA	FALSE	FALSE	FALSE	ebi-a-GCST004692	7	46566236	0.0827	36052	0.1444	Amyotrophic lateral sclerosis || id:ebi-a-GCST004692	Amyotrophic lateral sclerosis	Amyotrophic lateral sclerosis || ||	TRUE	igd	NA	NA	NA	NA	NA	NA	NA	90274840	9353	0.0532	2.71e-06	11344	90274840	TRUE	reported	DRSw98	90274840	2	TRUE	NA	NA	0.00193702	11344	5.92e-05	36052	TRUE
50	rs75508961	C	G	C	G	0.1731	0.0072	0.0504	NA	FALSE	TRUE	TRUE	ebi-a-GCST004692	2	215601711	0.0411	36052	0.8614	Amyotrophic lateral sclerosis || id:ebi-a-GCST004692	Amyotrophic lateral sclerosis	Amyotrophic lateral sclerosis || ||	TRUE	igd	NA	NA	NA	NA	NA	NA	NA	90274840	35	0.0362	1.74e-06	8297	90274840	TRUE	reported	DRSw98	90274840	2	FALSE	NA	NA	0.00274894	8297	8.51e-07	36052	TRUE
51	rs7583622	A	G	A	G	0.0748	0.0068	0.2098	NA	FALSE	FALSE	FALSE	ebi-a-GCST004692	2	53931190	0.0219	36052	0.755099	Amyotrophic lateral sclerosis || id:ebi-a-GCST004692	Amyotrophic lateral sclerosis	Amyotrophic lateral sclerosis || ||	TRUE	igd	NA	NA	NA	NA	NA	NA	NA	90274840	13	0.0161	3.38e-06	11769	90274840	TRUE	reported	DRSw98	90274840	2	TRUE	NA	NA	0.00183101	11769	2.67e-06	36052	TRUE
52	rs76913603	A	G	A	G	-0.1741	-0.0271	0.967	NA	FALSE	FALSE	FALSE	ebi-a-GCST004692	5	167809091	0.0506	36052	0.5923	Amyotrophic lateral sclerosis || id:ebi-a-GCST004692	Amyotrophic lateral sclerosis	Amyotrophic lateral sclerosis || ||	TRUE	igd	NA	NA	NA	NA	NA	NA	NA	90274840	42	0.0379	4.36e-06	11782	90274840	TRUE	reported	DRSw98	90274840	2	TRUE	NA	NA	0.00178812	11782	7.96e-06	36052	TRUE
53	rs77897196	T	C	T	C	-0.1917	-0.0666	0.9711	NA	FALSE	FALSE	FALSE	ebi-a-GCST004692	1	63459761	0.0553	36052	0.2284	Amyotrophic lateral sclerosis || id:ebi-a-GCST004692	Amyotrophic lateral sclerosis	Amyotrophic lateral sclerosis || ||	TRUE	igd	NA	NA	NA	NA	NA	NA	NA	90274840	2	0.041	2.93e-06	11792	90274840	TRUE	reported	DRSw98	90274840	2	TRUE	NA	NA	0.00185079	11792	4.02e-05	36052	TRUE
54	rs78477739	T	C	T	C	0.1462	0.0075	0.7457	NA	FALSE	FALSE	FALSE	ebi-a-GCST004692	6	32457465	0.0293	36052	0.7992	Amyotrophic lateral sclerosis || id:ebi-a-GCST004692	Amyotrophic lateral sclerosis	Amyotrophic lateral sclerosis || ||	TRUE	igd	TRUE	rs78477739	rs148333241	C	T	C	T	90274840	8025	0.0285	2.9e-07	6057	90274840	TRUE	reported	DRSw98	90274840	2	TRUE	NA	NA	0.0043272	6057	1.82e-06	36052	TRUE
55	rs10024178	T	C	T	C	-0.0925	0.0297	0.905	NA	FALSE	FALSE	FALSE	ebi-a-GCST004692	4	5801734	0.0305	36052	0.3299	Amyotrophic lateral sclerosis || id:ebi-a-GCST004692	Amyotrophic lateral sclerosis	Amyotrophic lateral sclerosis || ||	TRUE	igd	NA	NA	NA	NA	NA	NA	NA	90274759	13	0.0199	3.35e-06	14716	90274759	TRUE	reported	gj89tA	90274759	2	TRUE	NA	NA	0.00146625	14716	2.63e-05	36052	TRUE
56	rs111478357	T	C	T	C	0.2044	0.1113	0.0243	NA	FALSE	FALSE	FALSE	ebi-a-GCST004692	2	144650434	0.0586	36052	0.0575798	Amyotrophic lateral sclerosis || id:ebi-a-GCST004692	Amyotrophic lateral sclerosis	Amyotrophic lateral sclerosis || ||	TRUE	igd	NA	NA	NA	NA	NA	NA	NA	90274759	9	0.044	3.39e-06	13801	90274759	TRUE	reported	gj89tA	90274759	2	TRUE	NA	NA	0.00156146	13801	0.000100057	36052	TRUE
57	rs112665079	T	C	T	C	0.8932	0.0838	0.051	NA	FALSE	FALSE	FALSE	ebi-a-GCST004692	20	43120683	0.0403	36052	0.0376097	Amyotrophic lateral sclerosis || id:ebi-a-GCST004692	Amyotrophic lateral sclerosis	Amyotrophic lateral sclerosis || ||	TRUE	igd	NA	NA	NA	NA	NA	NA	NA	90274759	187	0.026	1e-200	14720	90274759	TRUE	reported	gj89tA	90274759	2	TRUE	NA	NA	0.074234	14720	0.000119928	36052	TRUE
58	rs113525696	G	GA	G	GA	0.0771	0.0237	0.6666	NA	FALSE	FALSE	FALSE	ebi-a-GCST004692	21	15450490	0.02	36052	0.2364	Amyotrophic lateral sclerosis || id:ebi-a-GCST004692	Amyotrophic lateral sclerosis	Amyotrophic lateral sclerosis || ||	TRUE	igd	NA	NA	NA	NA	NA	NA	NA	90274759	519	0.0155	6.55e-07	10894	90274759	TRUE	reported	gj89tA	90274759	2	TRUE	NA	NA	0.00226648	10894	3.9e-05	36052	TRUE
59	rs115657851	A	G	A	G	0.139	-0.0146	0.0462	NA	FALSE	FALSE	FALSE	ebi-a-GCST004692	1	57353848	0.0466	36052	0.7548	Amyotrophic lateral sclerosis || id:ebi-a-GCST004692	Amyotrophic lateral sclerosis	Amyotrophic lateral sclerosis || ||	TRUE	igd	NA	NA	NA	NA	NA	NA	NA	90274759	5	0.0293	2.1e-06	14715	90274759	TRUE	reported	gj89tA	90274759	2	TRUE	NA	NA	0.00152732	14715	2.72e-06	36052	TRUE
60	rs138960575	A	G	A	G	0.2878	-0.1721	0.9797	NA	FALSE	FALSE	FALSE	ebi-a-GCST004692	20	43240490	0.0737	36052	0.0195601	Amyotrophic lateral sclerosis || id:ebi-a-GCST004692	Amyotrophic lateral sclerosis	Amyotrophic lateral sclerosis || ||	TRUE	igd	NA	NA	NA	NA	NA	NA	NA	90274759	335	0.0507	1.37e-08	14288	90274759	TRUE	reported	gj89tA	90274759	2	TRUE	NA	NA	0.00225049	14288	0.000151236	36052	TRUE
61	rs147706532	A	G	A	G	-0.1816	-0.0225	0.0369	NA	FALSE	FALSE	FALSE	ebi-a-GCST004692	20	43086107	0.0545	36052	0.6805	Amyotrophic lateral sclerosis || id:ebi-a-GCST004692	Amyotrophic lateral sclerosis	Amyotrophic lateral sclerosis || ||	TRUE	igd	NA	NA	NA	NA	NA	NA	NA	90274759	148	0.034	9.23e-08	14714	90274759	TRUE	reported	gj89tA	90274759	2	TRUE	NA	NA	0.00193536	14714	4.73e-06	36052	TRUE
62	rs1608554	A	G	A	G	0.0598	0.0105	0.656	NA	FALSE	FALSE	FALSE	ebi-a-GCST004692	7	22807634	0.0183	36052	0.564	Amyotrophic lateral sclerosis || id:ebi-a-GCST004692	Amyotrophic lateral sclerosis	Amyotrophic lateral sclerosis || ||	TRUE	igd	NA	NA	NA	NA	NA	NA	NA	90274759	25	0.0122	9.5e-07	14733	90274759	TRUE	reported	gj89tA	90274759	2	TRUE	NA	NA	0.00162833	14733	9.13e-06	36052	TRUE
63	rs2527856	T	C	T	C	0.0562	0.006	0.5989	NA	FALSE	FALSE	FALSE	ebi-a-GCST004692	7	80678923	0.018	36052	0.739301	Amyotrophic lateral sclerosis || id:ebi-a-GCST004692	Amyotrophic lateral sclerosis	Amyotrophic lateral sclerosis || ||	TRUE	igd	NA	NA	NA	NA	NA	NA	NA	90274759	27	0.0122	4.09e-06	14288	90274759	TRUE	reported	gj89tA	90274759	2	TRUE	NA	NA	0.00148319	14288	3.08e-06	36052	TRUE
64	rs2620728	C	G	C	G	-0.0551	-0.0448	0.5267	NA	FALSE	TRUE	TRUE	ebi-a-GCST004692	12	65118323	0.018	36052	0.0126401	Amyotrophic lateral sclerosis || id:ebi-a-GCST004692	Amyotrophic lateral sclerosis	Amyotrophic lateral sclerosis || ||	TRUE	igd	NA	NA	NA	NA	NA	NA	NA	90274759	35	0.0119	3.65e-06	14288	90274759	TRUE	reported	gj89tA	90274759	2	FALSE	NA	NA	0.00149847	14288	0.000171803	36052	TRUE
65	rs6017383	T	C	T	C	-0.1776	0.0041	0.7625	NA	FALSE	FALSE	FALSE	ebi-a-GCST004692	20	43298501	0.0218	36052	0.8528	Amyotrophic lateral sclerosis || id:ebi-a-GCST004692	Amyotrophic lateral sclerosis	Amyotrophic lateral sclerosis || ||	TRUE	igd	NA	NA	NA	NA	NA	NA	NA	90274759	445	0.0141	2.23e-36	14715	90274759	TRUE	reported	gj89tA	90274759	2	TRUE	NA	NA	0.0106681	14715	9.81e-07	36052	TRUE
66	rs6130598	A	G	A	G	0.0771	0.0119	0.2279	NA	FALSE	FALSE	FALSE	ebi-a-GCST004692	20	42994389	0.0212	36052	0.5757	Amyotrophic lateral sclerosis || id:ebi-a-GCST004692	Amyotrophic lateral sclerosis	Amyotrophic lateral sclerosis || ||	TRUE	igd	NA	NA	NA	NA	NA	NA	NA	90274759	100	0.0142	5.65e-08	14288	90274759	TRUE	reported	gj89tA	90274759	2	TRUE	NA	NA	0.00205933	14288	8.74e-06	36052	TRUE
67	rs62319741	T	C	T	C	0.1281	-0.028	0.9456	NA	FALSE	FALSE	FALSE	ebi-a-GCST004692	4	124571895	0.0417	36052	0.5028	Amyotrophic lateral sclerosis || id:ebi-a-GCST004692	Amyotrophic lateral sclerosis	Amyotrophic lateral sclerosis || ||	TRUE	igd	NA	NA	NA	NA	NA	NA	NA	90274759	18	0.0258	6.87e-07	14733	90274759	TRUE	reported	gj89tA	90274759	2	TRUE	NA	NA	0.00167071	14733	1.25e-05	36052	TRUE
68	rs7292320	A	G	A	G	-0.0599	-0.0234	0.2529	NA	FALSE	FALSE	FALSE	ebi-a-GCST004692	22	37921425	0.0204	36052	0.251	Amyotrophic lateral sclerosis || id:ebi-a-GCST004692	Amyotrophic lateral sclerosis	Amyotrophic lateral sclerosis || ||	TRUE	igd	NA	NA	NA	NA	NA	NA	NA	90274759	521	0.0131	4.82e-06	14729	90274759	TRUE	reported	gj89tA	90274759	2	TRUE	NA	NA	0.00141769	14729	3.65e-05	36052	TRUE
69	rs80212763	T	C	T	C	0.9687	-0.085	0.0189	NA	FALSE	FALSE	FALSE	ebi-a-GCST004692	20	43223930	0.072	36052	0.2375	Amyotrophic lateral sclerosis || id:ebi-a-GCST004692	Amyotrophic lateral sclerosis	Amyotrophic lateral sclerosis || ||	TRUE	igd	NA	NA	NA	NA	NA	NA	NA	90274759	313	0.0448	1.1e-103	14249	90274759	TRUE	reported	gj89tA	90274759	2	TRUE	NA	NA	0.0317743	14249	3.87e-05	36052	TRUE
70	rs10988407	A	G	A	G	0.0777	-0.0149	0.2002	NA	FALSE	FALSE	FALSE	ebi-a-GCST004692	9	132281601	0.0223	36052	0.5047	Amyotrophic lateral sclerosis || id:ebi-a-GCST004692	Amyotrophic lateral sclerosis	Amyotrophic lateral sclerosis || ||	TRUE	igd	NA	NA	NA	NA	NA	NA	NA	90274814	54	0.0167	3.28e-06	11791	90274814	TRUE	reported	LFBQAa	90274814	2	TRUE	NA	NA	0.00183289	11791	1.24e-05	36052	TRUE
71	rs114829303	T	C	T	C	0.1661	0.0342	0.0436	NA	FALSE	FALSE	FALSE	ebi-a-GCST004692	1	37473314	0.0506	36052	0.499401	Amyotrophic lateral sclerosis || id:ebi-a-GCST004692	Amyotrophic lateral sclerosis	Amyotrophic lateral sclerosis || ||	TRUE	igd	NA	NA	NA	NA	NA	NA	NA	90274814	1	0.0361	4.2e-06	11344	90274814	TRUE	reported	LFBQAa	90274814	2	TRUE	NA	NA	0.00186305	11344	1.27e-05	36052	TRUE
72	rs12592185	T	C	T	C	0.0838	-0.0154	0.8068	NA	FALSE	FALSE	FALSE	ebi-a-GCST004692	15	70546132	0.0227	36052	0.497	Amyotrophic lateral sclerosis || id:ebi-a-GCST004692	Amyotrophic lateral sclerosis	Amyotrophic lateral sclerosis || ||	TRUE	igd	NA	NA	NA	NA	NA	NA	NA	90274814	60	0.0173	1.27e-06	11344	90274814	TRUE	reported	LFBQAa	90274814	2	TRUE	NA	NA	0.00206447	11344	1.28e-05	36052	TRUE
73	rs132210	T	C	T	C	-0.0686	0.0253	0.3408	NA	FALSE	FALSE	FALSE	ebi-a-GCST004692	22	48143913	0.0188	36052	0.1787	Amyotrophic lateral sclerosis || id:ebi-a-GCST004692	Amyotrophic lateral sclerosis	Amyotrophic lateral sclerosis || ||	TRUE	igd	NA	NA	NA	NA	NA	NA	NA	90274814	65	0.0141	1.14e-06	11344	90274814	TRUE	reported	LFBQAa	90274814	2	TRUE	NA	NA	0.00208264	11344	5.02e-05	36052	TRUE
74	rs17009223	A	G	A	G	-0.1169	-0.0427	0.0881	NA	FALSE	FALSE	FALSE	ebi-a-GCST004692	1	208050360	0.0311	36052	0.1687	Amyotrophic lateral sclerosis || id:ebi-a-GCST004692	Amyotrophic lateral sclerosis	Amyotrophic lateral sclerosis || ||	TRUE	igd	NA	NA	NA	NA	NA	NA	NA	90274814	6	0.0236	7.29e-07	11789	90274814	TRUE	reported	LFBQAa	90274814	2	TRUE	NA	NA	0.0020773	11789	5.23e-05	36052	TRUE
75	rs201464214	A	AT	A	AT	-0.2449	0.0823	0.9701	NA	FALSE	FALSE	FALSE	ebi-a-GCST004692	10	8132034	0.0601	36052	0.171	Amyotrophic lateral sclerosis || id:ebi-a-GCST004692	Amyotrophic lateral sclerosis	Amyotrophic lateral sclerosis || ||	TRUE	igd	NA	NA	NA	NA	NA	NA	NA	90274814	56	0.048	3.36e-07	8377	90274814	TRUE	reported	LFBQAa	90274814	2	TRUE	NA	NA	0.00309858	8377	5.2e-05	36052	TRUE
76	rs34639000	A	G	A	G	0.0765	0.0417	0.7289	NA	FALSE	FALSE	FALSE	ebi-a-GCST004692	5	95530542	0.0204	36052	0.0405005	Amyotrophic lateral sclerosis || id:ebi-a-GCST004692	Amyotrophic lateral sclerosis	Amyotrophic lateral sclerosis || ||	TRUE	igd	NA	NA	NA	NA	NA	NA	NA	90274814	24	0.0147	1.95e-07	11773	90274814	TRUE	reported	LFBQAa	90274814	2	TRUE	NA	NA	0.0022955	11773	0.000115893	36052	TRUE
77	rs4277106	A	G	A	G	-0.2747	-0.0061	0.9858	NA	FALSE	FALSE	FALSE	ebi-a-GCST004692	11	10380223	0.0711	36052	0.932	Amyotrophic lateral sclerosis || id:ebi-a-GCST004692	Amyotrophic lateral sclerosis	Amyotrophic lateral sclerosis || ||	TRUE	igd	NA	NA	NA	NA	NA	NA	NA	90274814	57	0.0592	3.48e-06	11790	90274814	TRUE	reported	LFBQAa	90274814	2	TRUE	NA	NA	0.00182323	11790	2.04e-07	36052	TRUE
78	rs62069649	A	G	A	G	0.2206	0.0211	0.0267	NA	FALSE	FALSE	FALSE	ebi-a-GCST004692	17	59402478	0.075	36052	0.7784	Amyotrophic lateral sclerosis || id:ebi-a-GCST004692	Amyotrophic lateral sclerosis	Amyotrophic lateral sclerosis || ||	TRUE	igd	NA	NA	NA	NA	NA	NA	NA	90274814	63	0.0482	4.72e-06	10431	90274814	TRUE	reported	LFBQAa	90274814	2	TRUE	NA	NA	0.00200448	10431	2.2e-06	36052	TRUE
79	rs7142197	A	G	A	G	-0.0924	-0.015	0.1442	NA	FALSE	FALSE	FALSE	ebi-a-GCST004692	14	93316119	0.0253	36052	0.554	Amyotrophic lateral sclerosis || id:ebi-a-GCST004692	Amyotrophic lateral sclerosis	Amyotrophic lateral sclerosis || ||	TRUE	igd	NA	NA	NA	NA	NA	NA	NA	90274814	59	0.0188	8.88e-07	11773	90274814	TRUE	reported	LFBQAa	90274814	2	TRUE	NA	NA	0.00204798	11773	9.75e-06	36052	TRUE
80	rs7193141	C	G	C	G	0.2407	0.0063	0.0351	NA	FALSE	TRUE	TRUE	ebi-a-GCST004692	16	86933894	0.0605	36052	0.9177	Amyotrophic lateral sclerosis || id:ebi-a-GCST004692	Amyotrophic lateral sclerosis	Amyotrophic lateral sclerosis || ||	TRUE	igd	NA	NA	NA	NA	NA	NA	NA	90274814	62	0.0521	3.84e-06	9377	90274814	TRUE	reported	LFBQAa	90274814	2	FALSE	NA	NA	0.00227153	9377	3.01e-07	36052	TRUE
81	rs10142466	A	G	A	G	0.057	-0.0316	0.49	NA	FALSE	FALSE	FALSE	ebi-a-GCST004692	14	69271784	0.0177	36052	0.0733297	Amyotrophic lateral sclerosis || id:ebi-a-GCST004692	Amyotrophic lateral sclerosis	Amyotrophic lateral sclerosis || ||	TRUE	igd	NA	NA	NA	NA	NA	NA	NA	90274830	623	0.0109	1.7e-07	14721	90274830	TRUE	reported	LifyBm	90274830	2	TRUE	NA	NA	0.00185444	14721	8.84e-05	36052	TRUE
82	rs112635299	T	G	T	G	0.2618	-0.0723	0.0205	NA	FALSE	FALSE	FALSE	ebi-a-GCST004692	14	94838142	0.0742	36052	0.3298	Amyotrophic lateral sclerosis || id:ebi-a-GCST004692	Amyotrophic lateral sclerosis	Amyotrophic lateral sclerosis || ||	TRUE	igd	NA	NA	NA	NA	NA	NA	NA	90274830	632	0.0433	1.48e-09	14733	90274830	TRUE	reported	LifyBm	90274830	2	TRUE	NA	NA	0.00247545	14733	2.63e-05	36052	TRUE
83	rs114165349	C	G	C	G	-0.1948	-0.0805	0.0337	NA	FALSE	TRUE	TRUE	ebi-a-GCST004692	1	27021913	0.0584	36052	0.1677	Amyotrophic lateral sclerosis || id:ebi-a-GCST004692	Amyotrophic lateral sclerosis	Amyotrophic lateral sclerosis || ||	TRUE	igd	NA	NA	NA	NA	NA	NA	NA	90274830	2	0.034	1.01e-08	14727	90274830	TRUE	reported	LifyBm	90274830	2	FALSE	NA	NA	0.00222432	14727	5.27e-05	36052	TRUE
84	rs1230164	C	G	C	G	-0.0671	-0.0101	0.7288	NA	FALSE	TRUE	TRUE	ebi-a-GCST004692	4	99986023	0.0197	36052	0.609	Amyotrophic lateral sclerosis || id:ebi-a-GCST004692	Amyotrophic lateral sclerosis	Amyotrophic lateral sclerosis || ||	TRUE	igd	NA	NA	NA	NA	NA	NA	NA	90274830	44	0.0129	1.98e-07	14285	90274830	TRUE	reported	LifyBm	90274830	2	FALSE	NA	NA	0.00189071	14285	7.29e-06	36052	TRUE
85	rs138408096	A	G	A	G	-0.2007	-0.042	0.0206	NA	FALSE	FALSE	FALSE	ebi-a-GCST004692	15	84250648	0.0673	36052	0.5321	Amyotrophic lateral sclerosis || id:ebi-a-GCST004692	Amyotrophic lateral sclerosis	Amyotrophic lateral sclerosis || ||	TRUE	igd	NA	NA	NA	NA	NA	NA	NA	90274830	634	0.0423	2.09e-06	14721	90274830	TRUE	reported	LifyBm	90274830	2	TRUE	NA	NA	0.00152712	14721	1.08e-05	36052	TRUE
86	rs138557324	T	C	T	C	-0.2253	-0.0382	0.0196	NA	FALSE	FALSE	FALSE	ebi-a-GCST004692	12	119984130	0.0718	36052	0.5953	Amyotrophic lateral sclerosis || id:ebi-a-GCST004692	Amyotrophic lateral sclerosis	Amyotrophic lateral sclerosis || ||	TRUE	igd	NA	NA	NA	NA	NA	NA	NA	90274830	615	0.0473	1.91e-06	14285	90274830	TRUE	reported	LifyBm	90274830	2	TRUE	NA	NA	0.00158596	14285	7.85e-06	36052	TRUE
87	rs1437633	A	C	A	C	-0.079	-0.0078	0.2072	NA	FALSE	FALSE	FALSE	ebi-a-GCST004692	11	16272199	0.0219	36052	0.720701	Amyotrophic lateral sclerosis || id:ebi-a-GCST004692	Amyotrophic lateral sclerosis	Amyotrophic lateral sclerosis || ||	TRUE	igd	NA	NA	NA	NA	NA	NA	NA	90274830	583	0.0147	7.69e-08	12851	90274830	TRUE	reported	LifyBm	90274830	2	TRUE	NA	NA	0.00224272	12851	3.52e-06	36052	TRUE
88	rs1493936	T	C	T	C	-0.258	0.1652	0.0224	NA	FALSE	FALSE	FALSE	ebi-a-GCST004692	8	119777640	0.0878	36052	0.06008	Amyotrophic lateral sclerosis || id:ebi-a-GCST004692	Amyotrophic lateral sclerosis	Amyotrophic lateral sclerosis || ||	TRUE	igd	NA	NA	NA	NA	NA	NA	NA	90274830	194	0.046	2.04e-08	14246	90274830	TRUE	reported	LifyBm	90274830	2	TRUE	NA	NA	0.0022036	14246	9.82e-05	36052	TRUE
89	rs17600346	T	C	T	C	-0.1569	0.0445	0.9631	NA	FALSE	FALSE	FALSE	ebi-a-GCST004692	3	172223982	0.0449	36052	0.3218	Amyotrophic lateral sclerosis || id:ebi-a-GCST004692	Amyotrophic lateral sclerosis	Amyotrophic lateral sclerosis || ||	TRUE	igd	NA	NA	NA	NA	NA	NA	NA	90274830	9	0.0299	1.54e-07	14723	90274830	TRUE	reported	LifyBm	90274830	2	TRUE	NA	NA	0.00186704	14723	2.72e-05	36052	TRUE
90	rs192337992	A	G	A	G	-0.1555	0.03	0.962	NA	FALSE	FALSE	FALSE	ebi-a-GCST004692	6	130506773	0.0447	36052	0.502	Amyotrophic lateral sclerosis || id:ebi-a-GCST004692	Amyotrophic lateral sclerosis	Amyotrophic lateral sclerosis || ||	TRUE	igd	NA	NA	NA	NA	NA	NA	NA	90274830	77	0.0334	3.23e-06	11978	90274830	TRUE	reported	LifyBm	90274830	2	TRUE	NA	NA	0.00180664	11978	1.25e-05	36052	TRUE
91	rs2247769	T	C	T	C	-0.1705	0.0186	0.5577	NA	FALSE	FALSE	FALSE	ebi-a-GCST004692	8	120081031	0.0176	36052	0.2925	Amyotrophic lateral sclerosis || id:ebi-a-GCST004692	Amyotrophic lateral sclerosis	Amyotrophic lateral sclerosis || ||	TRUE	igd	NA	NA	NA	NA	NA	NA	NA	90274830	301	0.0114	1.42e-50	14285	90274830	TRUE	reported	LifyBm	90274830	2	TRUE	NA	NA	0.0154195	14285	3.1e-05	36052	TRUE
92	rs271665	T	C	T	C	-0.0672	0.0211	0.748	NA	FALSE	FALSE	FALSE	ebi-a-GCST004692	17	47938521	0.0213	36052	0.3223	Amyotrophic lateral sclerosis || id:ebi-a-GCST004692	Amyotrophic lateral sclerosis	Amyotrophic lateral sclerosis || ||	TRUE	igd	NA	NA	NA	NA	NA	NA	NA	90274830	917	0.0129	1.9e-07	14710	90274830	TRUE	reported	LifyBm	90274830	2	TRUE	NA	NA	0.00184164	14710	2.72e-05	36052	TRUE
93	rs376613127	A	G	A	G	-0.2692	-0.0107	0.0133	NA	FALSE	FALSE	FALSE	ebi-a-GCST004692	12	71789031	0.0768	36052	0.8892	Amyotrophic lateral sclerosis || id:ebi-a-GCST004692	Amyotrophic lateral sclerosis	Amyotrophic lateral sclerosis || ||	TRUE	igd	NA	NA	NA	NA	NA	NA	NA	90274830	604	0.0568	2.14e-06	13154	90274830	TRUE	reported	LifyBm	90274830	2	TRUE	NA	NA	0.00170499	13154	5.38e-07	36052	TRUE
94	rs56009454	T	G	T	G	-0.0637	0.0459	0.3753	NA	FALSE	FALSE	FALSE	ebi-a-GCST004692	1	40059778	0.0186	36052	0.0134602	Amyotrophic lateral sclerosis || id:ebi-a-GCST004692	Amyotrophic lateral sclerosis	Amyotrophic lateral sclerosis || ||	TRUE	igd	TRUE	rs56009454	rs2746056	T	G	G	A	90274830	5	0.0139	4.59e-06	10894	90274830	TRUE	reported	LifyBm	90274830	2	TRUE	NA	NA	0.00192444	10894	0.000168897	36052	TRUE
95	rs58792577	T	C	T	C	-0.0665	0.0267	0.6822	NA	FALSE	FALSE	FALSE	ebi-a-GCST004692	8	119805839	0.0191	36052	0.1616	Amyotrophic lateral sclerosis || id:ebi-a-GCST004692	Amyotrophic lateral sclerosis	Amyotrophic lateral sclerosis || ||	TRUE	igd	NA	NA	NA	NA	NA	NA	NA	90274830	201	0.0119	2.29e-08	14724	90274830	TRUE	reported	LifyBm	90274830	2	TRUE	NA	NA	0.00211671	14724	5.42e-05	36052	TRUE
96	rs6985207	A	C	A	C	0.0522	0.0437	0.5556	NA	FALSE	FALSE	FALSE	ebi-a-GCST004692	8	8604423	0.0177	36052	0.0138	Amyotrophic lateral sclerosis || id:ebi-a-GCST004692	Amyotrophic lateral sclerosis	Amyotrophic lateral sclerosis || ||	TRUE	igd	NA	NA	NA	NA	NA	NA	NA	90274830	83	0.0114	4.67e-06	14285	90274830	TRUE	reported	LifyBm	90274830	2	TRUE	NA	NA	0.0014658	14285	0.000169059	36052	TRUE
97	rs704	A	G	A	G	-0.1404	0.0285	0.4726	NA	FALSE	FALSE	FALSE	ebi-a-GCST004692	17	26694861	0.0178	36052	0.1103	Amyotrophic lateral sclerosis || id:ebi-a-GCST004692	Amyotrophic lateral sclerosis	Amyotrophic lateral sclerosis || ||	TRUE	igd	NA	NA	NA	NA	NA	NA	NA	90274830	762	0.0111	1.14e-36	14733	90274830	TRUE	reported	LifyBm	90274830	2	TRUE	NA	NA	0.010744	14733	7.11e-05	36052	TRUE
98	rs74111611	T	C	T	C	-0.1471	0.0351	0.9603	NA	FALSE	FALSE	FALSE	ebi-a-GCST004692	12	85607051	0.0471	36052	0.4559	Amyotrophic lateral sclerosis || id:ebi-a-GCST004692	Amyotrophic lateral sclerosis	Amyotrophic lateral sclerosis || ||	TRUE	igd	NA	NA	NA	NA	NA	NA	NA	90274830	606	0.0298	7.96e-07	14732	90274830	TRUE	reported	LifyBm	90274830	2	TRUE	NA	NA	0.00165148	14732	1.54e-05	36052	TRUE
99	rs77507094	A	G	A	G	0.1965	-0.043	0.9791	NA	FALSE	FALSE	FALSE	ebi-a-GCST004692	10	55029035	0.0677	36052	0.5255	Amyotrophic lateral sclerosis || id:ebi-a-GCST004692	Amyotrophic lateral sclerosis	Amyotrophic lateral sclerosis || ||	TRUE	igd	NA	NA	NA	NA	NA	NA	NA	90274830	568	0.0429	4.64e-06	14726	90274830	TRUE	reported	LifyBm	90274830	2	TRUE	NA	NA	0.00142287	14726	1.12e-05	36052	TRUE
100	rs9946923	T	C	T	C	0.172	-0.0204	0.9707	NA	FALSE	FALSE	FALSE	ebi-a-GCST004692	18	76523646	0.0533	36052	0.7019	Amyotrophic lateral sclerosis || id:ebi-a-GCST004692	Amyotrophic lateral sclerosis	Amyotrophic lateral sclerosis || ||	TRUE	igd	NA	NA	NA	NA	NA	NA	NA	90274830	919	0.0376	4.77e-06	13230	90274830	TRUE	reported	LifyBm	90274830	2	TRUE	NA	NA	0.00157943	13230	4.06e-06	36052	TRUE
101	rs10412462	A	C	A	C	-0.1731	0.1195	0.0363	NA	FALSE	FALSE	FALSE	ebi-a-GCST004692	19	14691684	0.0517	36052	0.0207998	Amyotrophic lateral sclerosis || id:ebi-a-GCST004692	Amyotrophic lateral sclerosis	Amyotrophic lateral sclerosis || ||	TRUE	igd	NA	NA	NA	NA	NA	NA	NA	90274828	38	0.0366	2.25e-06	11790	90274828	TRUE	reported	NWYDIp	90274828	2	TRUE	NA	NA	0.00189395	11790	0.000148178	36052	TRUE
102	rs113580784	A	G	A	G	-0.2288	0.1156	0.0208	NA	FALSE	FALSE	FALSE	ebi-a-GCST004692	20	55469957	0.0845	36052	0.1712	Amyotrophic lateral sclerosis || id:ebi-a-GCST004692	Amyotrophic lateral sclerosis	Amyotrophic lateral sclerosis || ||	TRUE	igd	NA	NA	NA	NA	NA	NA	NA	90274828	42	0.0495	3.8e-06	11768	90274828	TRUE	reported	NWYDIp	90274828	2	TRUE	NA	NA	0.00181253	11768	5.19e-05	36052	TRUE
103	rs148164126	A	G	A	G	0.2217	0.082	0.022	NA	FALSE	FALSE	FALSE	ebi-a-GCST004692	16	25004804	0.0702	36052	0.2426	Amyotrophic lateral sclerosis || id:ebi-a-GCST004692	Amyotrophic lateral sclerosis	Amyotrophic lateral sclerosis || ||	TRUE	igd	NA	NA	NA	NA	NA	NA	NA	90274828	30	0.048	3.86e-06	11774	90274828	TRUE	reported	NWYDIp	90274828	2	TRUE	NA	NA	0.00180889	11774	3.78e-05	36052	TRUE
104	rs182274799	A	G	A	G	0.1565	0.0127	0.0646	NA	FALSE	FALSE	FALSE	ebi-a-GCST004692	11	10358788	0.0356	36052	0.7212	Amyotrophic lateral sclerosis || id:ebi-a-GCST004692	Amyotrophic lateral sclerosis	Amyotrophic lateral sclerosis || ||	TRUE	igd	NA	NA	NA	NA	NA	NA	NA	90274828	24	0.031	4.46e-07	9461	90274828	TRUE	reported	NWYDIp	90274828	2	TRUE	NA	NA	0.00268715	9461	3.53e-06	36052	TRUE
105	rs29630	T	C	T	C	-0.074	0.013	0.2493	NA	FALSE	FALSE	FALSE	ebi-a-GCST004692	5	171026588	0.0212	36052	0.5394	Amyotrophic lateral sclerosis || id:ebi-a-GCST004692	Amyotrophic lateral sclerosis	Amyotrophic lateral sclerosis || ||	TRUE	igd	NA	NA	NA	NA	NA	NA	NA	90274828	16	0.0159	3.25e-06	11343	90274828	TRUE	reported	NWYDIp	90274828	2	TRUE	NA	NA	0.00190629	11343	1.04e-05	36052	TRUE
106	rs4360502	A	G	A	G	-0.0652	0.0058	0.3445	NA	FALSE	FALSE	FALSE	ebi-a-GCST004692	1	214886642	0.0187	36052	0.7579	Amyotrophic lateral sclerosis || id:ebi-a-GCST004692	Amyotrophic lateral sclerosis	Amyotrophic lateral sclerosis || ||	TRUE	igd	NA	NA	NA	NA	NA	NA	NA	90274828	2	0.0141	3.76e-06	11342	90274828	TRUE	reported	NWYDIp	90274828	2	TRUE	NA	NA	0.00188203	11342	2.67e-06	36052	TRUE
107	rs62120726	A	G	A	G	0.0786	-0.0192	0.8077	NA	FALSE	FALSE	FALSE	ebi-a-GCST004692	2	15734798	0.0225	36052	0.3928	Amyotrophic lateral sclerosis || id:ebi-a-GCST004692	Amyotrophic lateral sclerosis	Amyotrophic lateral sclerosis || ||	TRUE	igd	NA	NA	NA	NA	NA	NA	NA	90274828	5	0.0172	4.88e-06	11343	90274828	TRUE	reported	NWYDIp	90274828	2	TRUE	NA	NA	0.00183797	11343	2.02e-05	36052	TRUE
108	rs7202385	A	T	A	T	0.0746	-0.0236	0.6725	NA	FALSE	TRUE	TRUE	ebi-a-GCST004692	16	26080883	0.0196	36052	0.2288	Amyotrophic lateral sclerosis || id:ebi-a-GCST004692	Amyotrophic lateral sclerosis	Amyotrophic lateral sclerosis || ||	TRUE	igd	NA	NA	NA	NA	NA	NA	NA	90274828	31	0.0157	2.02e-06	9460	90274828	TRUE	reported	NWYDIp	90274828	2	FALSE	NA	NA	0.00238146	9460	4.02e-05	36052	TRUE
109	rs7712604	C	G	C	G	-0.0879	-0.0129	0.6738	NA	FALSE	TRUE	TRUE	ebi-a-GCST004692	5	21508959	0.0198	36052	0.515101	Amyotrophic lateral sclerosis || id:ebi-a-GCST004692	Amyotrophic lateral sclerosis	Amyotrophic lateral sclerosis || ||	TRUE	igd	NA	NA	NA	NA	NA	NA	NA	90274828	12	0.0176	5.9e-07	8587	90274828	TRUE	reported	NWYDIp	90274828	2	FALSE	NA	NA	0.00289702	8587	1.18e-05	36052	TRUE
110	rs77216559	T	C	T	C	0.1667	-0.0189	0.958	NA	FALSE	FALSE	FALSE	ebi-a-GCST004692	11	4475910	0.0538	36052	0.7252	Amyotrophic lateral sclerosis || id:ebi-a-GCST004692	Amyotrophic lateral sclerosis	Amyotrophic lateral sclerosis || ||	TRUE	igd	NA	NA	NA	NA	NA	NA	NA	90274828	23	0.034	9.44e-07	11791	90274828	TRUE	reported	NWYDIp	90274828	2	TRUE	NA	NA	0.00203494	11791	3.42e-06	36052	TRUE
111	rs8033310	T	C	T	C	0.1332	-0.0568	0.9133	NA	FALSE	FALSE	FALSE	ebi-a-GCST004692	15	24046105	0.0347	36052	0.1019	Amyotrophic lateral sclerosis || id:ebi-a-GCST004692	Amyotrophic lateral sclerosis	Amyotrophic lateral sclerosis || ||	TRUE	igd	NA	NA	NA	NA	NA	NA	NA	90274828	28	0.0286	3.2e-06	11343	90274828	TRUE	reported	NWYDIp	90274828	2	TRUE	NA	NA	0.00190895	11343	7.43e-05	36052	TRUE
112	rs908372	C	G	C	G	-0.0622	-0.0016	0.3324	NA	FALSE	TRUE	TRUE	ebi-a-GCST004692	2	172434373	0.0188	36052	0.9335	Amyotrophic lateral sclerosis || id:ebi-a-GCST004692	Amyotrophic lateral sclerosis	Amyotrophic lateral sclerosis || ||	TRUE	igd	NA	NA	NA	NA	NA	NA	NA	90274828	7	0.0136	4.8e-06	11773	90274828	TRUE	reported	NWYDIp	90274828	2	FALSE	NA	NA	0.00177386	11773	2.01e-07	36052	TRUE
113	rs10831650	A	G	A	G	0.0692	-0.0016	0.3558	NA	FALSE	FALSE	FALSE	ebi-a-GCST004692	11	11644391	0.0186	36052	0.9311	Amyotrophic lateral sclerosis || id:ebi-a-GCST004692	Amyotrophic lateral sclerosis	Amyotrophic lateral sclerosis || ||	TRUE	igd	NA	NA	NA	NA	NA	NA	NA	90274846	369	0.0125	3.09e-08	14288	90274846	TRUE	reported	oz36qv	90274846	2	TRUE	NA	NA	0.00214067	14288	2.05e-07	36052	TRUE
114	rs11136339	T	C	T	C	0.0613	-0.0132	0.388	NA	FALSE	FALSE	FALSE	ebi-a-GCST004692	8	145013345	0.0184	36052	0.4749	Amyotrophic lateral sclerosis || id:ebi-a-GCST004692	Amyotrophic lateral sclerosis	Amyotrophic lateral sclerosis || ||	TRUE	igd	NA	NA	NA	NA	NA	NA	NA	90274846	263	0.0122	5.05e-07	13664	90274846	TRUE	reported	oz36qv	90274846	2	TRUE	NA	NA	0.00184453	13664	1.43e-05	36052	TRUE
115	rs114744971	A	G	A	G	-0.2291	-0.1773	0.9782	NA	FALSE	FALSE	FALSE	ebi-a-GCST004692	3	142748221	0.0724	36052	0.01439	Amyotrophic lateral sclerosis || id:ebi-a-GCST004692	Amyotrophic lateral sclerosis	Amyotrophic lateral sclerosis || ||	TRUE	igd	NA	NA	NA	NA	NA	NA	NA	90274846	195	0.0453	4.25e-07	14245	90274846	TRUE	reported	oz36qv	90274846	2	TRUE	NA	NA	0.00179256	14245	0.000166327	36052	TRUE
116	rs11738159	T	C	T	C	0.0577	0.0042	0.4339	NA	FALSE	FALSE	FALSE	ebi-a-GCST004692	5	167311493	0.0179	36052	0.8133	Amyotrophic lateral sclerosis || id:ebi-a-GCST004692	Amyotrophic lateral sclerosis	Amyotrophic lateral sclerosis || ||	TRUE	igd	NA	NA	NA	NA	NA	NA	NA	90274846	234	0.0119	1.24e-06	14288	90274846	TRUE	reported	oz36qv	90274846	2	TRUE	NA	NA	0.00164298	14288	1.53e-06	36052	TRUE
117	rs117550445	C	G	C	G	-0.1855	-0.047	0.9706	NA	FALSE	TRUE	TRUE	ebi-a-GCST004692	12	82487578	0.0525	36052	0.371	Amyotrophic lateral sclerosis || id:ebi-a-GCST004692	Amyotrophic lateral sclerosis	Amyotrophic lateral sclerosis || ||	TRUE	igd	NA	NA	NA	NA	NA	NA	NA	90274846	380	0.0377	8.64e-07	14721	90274846	TRUE	reported	oz36qv	90274846	2	FALSE	NA	NA	0.00164215	14721	2.22e-05	36052	TRUE
118	rs117799464	A	G	A	G	0.2043	0.0608	0.9767	NA	FALSE	FALSE	FALSE	ebi-a-GCST004692	6	70731400	0.065	36052	0.3497	Amyotrophic lateral sclerosis || id:ebi-a-GCST004692	Amyotrophic lateral sclerosis	Amyotrophic lateral sclerosis || ||	TRUE	igd	NA	NA	NA	NA	NA	NA	NA	90274846	238	0.0443	3.99e-06	14288	90274846	TRUE	reported	oz36qv	90274846	2	TRUE	NA	NA	0.00148653	14288	2.43e-05	36052	TRUE
119	rs12145644	A	T	A	T	-0.0727	0.0141	0.2484	NA	FALSE	TRUE	TRUE	ebi-a-GCST004692	1	162517994	0.0206	36052	0.4946	Amyotrophic lateral sclerosis || id:ebi-a-GCST004692	Amyotrophic lateral sclerosis	Amyotrophic lateral sclerosis || ||	TRUE	igd	NA	NA	NA	NA	NA	NA	NA	90274846	3	0.0141	2.52e-07	14287	90274846	TRUE	reported	oz36qv	90274846	2	FALSE	NA	NA	0.00185756	14287	1.3e-05	36052	TRUE
120	rs12726054	A	G	A	G	0.109	0.0289	0.0734	NA	FALSE	FALSE	FALSE	ebi-a-GCST004692	1	233623860	0.0361	36052	0.4237	Amyotrophic lateral sclerosis || id:ebi-a-GCST004692	Amyotrophic lateral sclerosis	Amyotrophic lateral sclerosis || ||	TRUE	igd	NA	NA	NA	NA	NA	NA	NA	90274846	15	0.0228	1.75e-06	14721	90274846	TRUE	reported	oz36qv	90274846	2	TRUE	NA	NA	0.00155036	14721	1.78e-05	36052	TRUE
121	rs13107325	T	C	T	C	0.2027	0.0501	0.0696	NA	FALSE	FALSE	FALSE	ebi-a-GCST004692	4	103188709	0.0357	36052	0.1604	Amyotrophic lateral sclerosis || id:ebi-a-GCST004692	Amyotrophic lateral sclerosis	Amyotrophic lateral sclerosis || ||	TRUE	igd	NA	NA	NA	NA	NA	NA	NA	90274846	212	0.0236	8.77e-18	14733	90274846	TRUE	reported	oz36qv	90274846	2	TRUE	NA	NA	0.0049829	14733	5.46e-05	36052	TRUE
122	rs16879825	A	G	A	G	-0.2027	-0.0645	0.9577	NA	FALSE	FALSE	FALSE	ebi-a-GCST004692	6	88516736	0.0739	36052	0.383	Amyotrophic lateral sclerosis || id:ebi-a-GCST004692	Amyotrophic lateral sclerosis	Amyotrophic lateral sclerosis || ||	TRUE	igd	NA	NA	NA	NA	NA	NA	NA	90274846	239	0.0438	3.69e-06	11784	90274846	TRUE	reported	oz36qv	90274846	2	TRUE	NA	NA	0.00181448	11784	2.11e-05	36052	TRUE
123	rs2163333	A	G	A	G	0.1404	-0.0276	0.9522	NA	FALSE	FALSE	FALSE	ebi-a-GCST004692	2	53077754	0.0412	36052	0.502599	Amyotrophic lateral sclerosis || id:ebi-a-GCST004692	Amyotrophic lateral sclerosis	Amyotrophic lateral sclerosis || ||	TRUE	igd	NA	NA	NA	NA	NA	NA	NA	90274846	19	0.0273	2.71e-07	14719	90274846	TRUE	reported	oz36qv	90274846	2	TRUE	NA	NA	0.00179395	14719	1.24e-05	36052	TRUE
124	rs2738752	A	G	A	G	-0.0591	0.0029	0.6653	NA	FALSE	FALSE	FALSE	ebi-a-GCST004692	1	221052765	0.0187	36052	0.8775	Amyotrophic lateral sclerosis || id:ebi-a-GCST004692	Amyotrophic lateral sclerosis	Amyotrophic lateral sclerosis || ||	TRUE	igd	NA	NA	NA	NA	NA	NA	NA	90274846	14	0.0129	4.62e-06	12848	90274846	TRUE	reported	oz36qv	90274846	2	TRUE	NA	NA	0.00163124	12848	6.67e-07	36052	TRUE
125	rs34790908	T	C	T	C	0.211	0.0509	0.2563	NA	FALSE	FALSE	FALSE	ebi-a-GCST004692	17	7451110	0.0199	36052	0.01064	Amyotrophic lateral sclerosis || id:ebi-a-GCST004692	Amyotrophic lateral sclerosis	Amyotrophic lateral sclerosis || ||	TRUE	igd	NA	NA	NA	NA	NA	NA	NA	90274846	658	0.0129	3.9e-60	14732	90274846	TRUE	reported	oz36qv	90274846	2	TRUE	NA	NA	0.0178388	14732	0.000181445	36052	TRUE
126	rs3821473	A	G	A	G	-0.0622	-0.034	0.2327	NA	FALSE	FALSE	FALSE	ebi-a-GCST004692	3	59625877	0.0209	36052	0.1043	Amyotrophic lateral sclerosis || id:ebi-a-GCST004692	Amyotrophic lateral sclerosis	Amyotrophic lateral sclerosis || ||	TRUE	igd	NA	NA	NA	NA	NA	NA	NA	90274846	31	0.0136	4.8e-06	14736	90274846	TRUE	reported	oz36qv	90274846	2	TRUE	NA	NA	0.00141764	14736	7.34e-05	36052	TRUE
127	rs4882710	T	C	T	C	0.0666	-0.0196	0.3457	NA	FALSE	FALSE	FALSE	ebi-a-GCST004692	12	129101566	0.0192	36052	0.3071	Amyotrophic lateral sclerosis || id:ebi-a-GCST004692	Amyotrophic lateral sclerosis	Amyotrophic lateral sclerosis || ||	TRUE	igd	NA	NA	NA	NA	NA	NA	NA	90274846	383	0.0131	3.7e-07	14288	90274846	TRUE	reported	oz36qv	90274846	2	TRUE	NA	NA	0.00180597	14288	2.89e-05	36052	TRUE
128	rs56023600	T	C	T	C	-0.0856	-0.0303	0.8764	NA	FALSE	FALSE	FALSE	ebi-a-GCST004692	9	5636355	0.0278	36052	0.2756	Amyotrophic lateral sclerosis || id:ebi-a-GCST004692	Amyotrophic lateral sclerosis	Amyotrophic lateral sclerosis || ||	TRUE	igd	NA	NA	NA	NA	NA	NA	NA	90274846	295	0.0186	4.18e-06	14287	90274846	TRUE	reported	oz36qv	90274846	2	TRUE	NA	NA	0.00148046	14287	3.3e-05	36052	TRUE
129	rs58743186	A	G	A	G	-0.0717	-0.0015	0.1931	NA	FALSE	FALSE	FALSE	ebi-a-GCST004692	11	130975896	0.0221	36052	0.9442	Amyotrophic lateral sclerosis || id:ebi-a-GCST004692	Amyotrophic lateral sclerosis	Amyotrophic lateral sclerosis || ||	TRUE	igd	NA	NA	NA	NA	NA	NA	NA	90274846	377	0.0154	3.23e-06	12818	90274846	TRUE	reported	oz36qv	90274846	2	TRUE	NA	NA	0.00168854	12818	1.28e-07	36052	TRUE
130	rs62059693	T	C	T	C	0.1069	-0.0175	0.8557	NA	FALSE	FALSE	FALSE	ebi-a-GCST004692	17	7723513	0.025	36052	0.4848	Amyotrophic lateral sclerosis || id:ebi-a-GCST004692	Amyotrophic lateral sclerosis	Amyotrophic lateral sclerosis || ||	TRUE	igd	NA	NA	NA	NA	NA	NA	NA	90274846	854	0.0173	6.44e-10	14288	90274846	TRUE	reported	oz36qv	90274846	2	TRUE	NA	NA	0.00266559	14288	1.36e-05	36052	TRUE
131	rs7019909	T	C	T	C	-0.0897	0.0333	0.1102	NA	FALSE	FALSE	FALSE	ebi-a-GCST004692	9	33113322	0.0294	36052	0.2569	Amyotrophic lateral sclerosis || id:ebi-a-GCST004692	Amyotrophic lateral sclerosis	Amyotrophic lateral sclerosis || ||	TRUE	igd	NA	NA	NA	NA	NA	NA	NA	90274846	296	0.0193	3.36e-06	14288	90274846	TRUE	reported	oz36qv	90274846	2	TRUE	NA	NA	0.00150974	14288	3.56e-05	36052	TRUE
132	rs73133996	C	G	C	G	0.0812	-0.0364	0.4558	NA	FALSE	TRUE	TRUE	ebi-a-GCST004692	3	98429219	0.0179	36052	0.0422105	Amyotrophic lateral sclerosis || id:ebi-a-GCST004692	Amyotrophic lateral sclerosis	Amyotrophic lateral sclerosis || ||	TRUE	igd	NA	NA	NA	NA	NA	NA	NA	90274846	51	0.012	1.32e-11	14288	90274846	TRUE	reported	oz36qv	90274846	2	FALSE	NA	NA	0.00319484	14288	0.000114694	36052	TRUE
133	rs73590361	T	C	T	C	-0.0744	0.0254	0.1517	NA	FALSE	FALSE	FALSE	ebi-a-GCST004692	12	592399	0.0252	36052	0.3144	Amyotrophic lateral sclerosis || id:ebi-a-GCST004692	Amyotrophic lateral sclerosis	Amyotrophic lateral sclerosis || ||	TRUE	igd	NA	NA	NA	NA	NA	NA	NA	90274846	378	0.0161	3.82e-06	14726	90274846	TRUE	reported	oz36qv	90274846	2	TRUE	NA	NA	0.00144823	14726	2.82e-05	36052	TRUE
134	rs74351250	A	G	A	G	-0.2729	-0.0214	0.044	NA	FALSE	FALSE	FALSE	ebi-a-GCST004692	17	7569542	0.0459	36052	0.641	Amyotrophic lateral sclerosis || id:ebi-a-GCST004692	Amyotrophic lateral sclerosis	Amyotrophic lateral sclerosis || ||	TRUE	igd	NA	NA	NA	NA	NA	NA	NA	90274846	796	0.0326	5.71e-17	14288	90274846	TRUE	reported	oz36qv	90274846	2	TRUE	NA	NA	0.00488131	14288	6.03e-06	36052	TRUE
135	rs76047473	T	C	T	C	0.1318	0.0229	0.0482	NA	FALSE	FALSE	FALSE	ebi-a-GCST004692	10	132815955	0.042	36052	0.5855	Amyotrophic lateral sclerosis || id:ebi-a-GCST004692	Amyotrophic lateral sclerosis	Amyotrophic lateral sclerosis || ||	TRUE	igd	NA	NA	NA	NA	NA	NA	NA	90274846	368	0.0286	4.06e-06	14718	90274846	TRUE	reported	oz36qv	90274846	2	TRUE	NA	NA	0.00144106	14718	8.25e-06	36052	TRUE
136	rs76133364	A	C	A	C	0.1896	0.0338	0.0315	NA	FALSE	FALSE	FALSE	ebi-a-GCST004692	19	19706214	0.0593	36052	0.568	Amyotrophic lateral sclerosis || id:ebi-a-GCST004692	Amyotrophic lateral sclerosis	Amyotrophic lateral sclerosis || ||	TRUE	igd	NA	NA	NA	NA	NA	NA	NA	90274846	883	0.0369	2.77e-07	13224	90274846	TRUE	reported	oz36qv	90274846	2	TRUE	NA	NA	0.00199278	13224	9.01e-06	36052	TRUE
137	rs9842051	C	G	C	G	0.1192	-0.0258	0.748	NA	FALSE	TRUE	TRUE	ebi-a-GCST004692	3	143021856	0.0204	36052	0.207	Amyotrophic lateral sclerosis || id:ebi-a-GCST004692	Amyotrophic lateral sclerosis	Amyotrophic lateral sclerosis || ||	TRUE	igd	NA	NA	NA	NA	NA	NA	NA	90274846	197	0.014	1.68e-17	14288	90274846	TRUE	reported	oz36qv	90274846	2	FALSE	NA	NA	0.00504879	14288	4.44e-05	36052	TRUE
138	rs10067443	T	C	T	C	-0.0753	0.0097	0.8011	NA	FALSE	FALSE	FALSE	ebi-a-GCST004692	5	19244332	0.0221	36052	0.6607	Amyotrophic lateral sclerosis || id:ebi-a-GCST004692	Amyotrophic lateral sclerosis	Amyotrophic lateral sclerosis || ||	TRUE	igd	NA	NA	NA	NA	NA	NA	NA	90274795	52	0.0149	4.33e-07	14296	90274795	TRUE	reported	rQHPNn	90274795	2	TRUE	NA	NA	0.00178356	14296	5.34e-06	36052	TRUE
139	rs11443190	A	AG	A	AG	0.0622	0.0076	0.5045	NA	FALSE	FALSE	FALSE	ebi-a-GCST004692	22	32844853	0.0178	36052	0.6712	Amyotrophic lateral sclerosis || id:ebi-a-GCST004692	Amyotrophic lateral sclerosis	Amyotrophic lateral sclerosis || ||	TRUE	igd	NA	NA	NA	NA	NA	NA	NA	90274795	2241	0.0133	2.92e-06	11326	90274795	TRUE	reported	rQHPNn	90274795	2	TRUE	NA	NA	0.0019277	11326	5.06e-06	36052	TRUE
140	rs12123181	A	G	A	G	-0.0996	0.0097	0.2042	NA	FALSE	FALSE	FALSE	ebi-a-GCST004692	1	206954566	0.0227	36052	0.6687	Amyotrophic lateral sclerosis || id:ebi-a-GCST004692	Amyotrophic lateral sclerosis	Amyotrophic lateral sclerosis || ||	TRUE	igd	NA	NA	NA	NA	NA	NA	NA	90274795	27	0.0151	4.22e-11	14296	90274795	TRUE	reported	rQHPNn	90274795	2	TRUE	NA	NA	0.00303453	14296	5.07e-06	36052	TRUE
141	rs138203589	T	G	T	G	0.1937	-0.0631	0.0455	NA	FALSE	FALSE	FALSE	ebi-a-GCST004692	2	125939274	0.0663	36052	0.3417	Amyotrophic lateral sclerosis || id:ebi-a-GCST004692	Amyotrophic lateral sclerosis	Amyotrophic lateral sclerosis || ||	TRUE	igd	NA	NA	NA	NA	NA	NA	NA	90274795	41	0.0418	3.59e-06	14730	90274795	TRUE	reported	rQHPNn	90274795	2	TRUE	NA	NA	0.0014559	14730	2.51e-05	36052	TRUE
142	rs148332061	C	G	C	G	0.1112	0.0423	0.1005	NA	FALSE	TRUE	TRUE	ebi-a-GCST004692	7	590757	0.0448	36052	0.3457	Amyotrophic lateral sclerosis || id:ebi-a-GCST004692	Amyotrophic lateral sclerosis	Amyotrophic lateral sclerosis || ||	TRUE	igd	NA	NA	NA	NA	NA	NA	NA	90274795	2170	0.0239	3.28e-06	13232	90274795	TRUE	reported	rQHPNn	90274795	2	FALSE	NA	NA	0.00163359	13232	2.47e-05	36052	TRUE
143	rs17654493	T	C	T	C	0.2951	0.0309	0.014	NA	FALSE	FALSE	FALSE	ebi-a-GCST004692	6	18825879	0.0789	36052	0.6948	Amyotrophic lateral sclerosis || id:ebi-a-GCST004692	Amyotrophic lateral sclerosis	Amyotrophic lateral sclerosis || ||	TRUE	igd	NA	NA	NA	NA	NA	NA	NA	90274795	70	0.0626	2.43e-06	12313	90274795	TRUE	reported	rQHPNn	90274795	2	TRUE	NA	NA	0.00180183	12313	4.25e-06	36052	TRUE
144	rs184284634	A	G	A	G	0.141	-0.0053	0.8437	NA	FALSE	FALSE	FALSE	ebi-a-GCST004692	6	32508305	0.0572	36052	0.9258	Amyotrophic lateral sclerosis || id:ebi-a-GCST004692	Amyotrophic lateral sclerosis	Amyotrophic lateral sclerosis || ||	TRUE	igd	NA	NA	NA	NA	NA	NA	NA	90274795	556	0.0275	2.94e-07	8978	90274795	TRUE	reported	rQHPNn	90274795	2	TRUE	NA	NA	0.00292025	8978	2.38e-07	36052	TRUE
145	rs188535859	T	C	T	C	-0.2351	-0.0371	0.0174	NA	FALSE	FALSE	FALSE	ebi-a-GCST004692	2	201728383	0.0649	36052	0.567799	Amyotrophic lateral sclerosis || id:ebi-a-GCST004692	Amyotrophic lateral sclerosis	Amyotrophic lateral sclerosis || ||	TRUE	igd	NA	NA	NA	NA	NA	NA	NA	90274795	43	0.0486	1.32e-06	14741	90274795	TRUE	reported	rQHPNn	90274795	2	TRUE	NA	NA	0.00158517	14741	9.06e-06	36052	TRUE
146	rs202092984	A	G	A	G	0.1563	-0.0659	0.0498	NA	FALSE	FALSE	FALSE	ebi-a-GCST004692	2	87276729	0.041	36052	0.1078	Amyotrophic lateral sclerosis || id:ebi-a-GCST004692	Amyotrophic lateral sclerosis	Amyotrophic lateral sclerosis || ||	TRUE	igd	NA	NA	NA	NA	NA	NA	NA	90274795	38	0.0341	4.57e-06	11768	90274795	TRUE	reported	rQHPNn	90274795	2	TRUE	NA	NA	0.0017824	11768	7.17e-05	36052	TRUE
147	rs2243173	A	T	A	T	-0.1199	-0.0095	0.0681	NA	FALSE	TRUE	TRUE	ebi-a-GCST004692	1	207011458	0.0386	36052	0.8051	Amyotrophic lateral sclerosis || id:ebi-a-GCST004692	Amyotrophic lateral sclerosis	Amyotrophic lateral sclerosis || ||	TRUE	igd	NA	NA	NA	NA	NA	NA	NA	90274795	36	0.0251	1.78e-06	14296	90274795	TRUE	reported	rQHPNn	90274795	2	FALSE	NA	NA	0.00159384	14296	1.68e-06	36052	TRUE
148	rs3020582	A	C	A	C	0.0634	-0.0015	0.3139	NA	FALSE	FALSE	FALSE	ebi-a-GCST004692	6	31351522	0.0192	36052	0.9361	Amyotrophic lateral sclerosis || id:ebi-a-GCST004692	Amyotrophic lateral sclerosis	Amyotrophic lateral sclerosis || ||	TRUE	igd	NA	NA	NA	NA	NA	NA	NA	90274795	122	0.0135	2.65e-06	12860	90274795	TRUE	reported	rQHPNn	90274795	2	TRUE	NA	NA	0.00171235	12860	1.69e-07	36052	TRUE
149	rs3135932	A	G	A	G	-0.1597	-0.0114	0.823	NA	FALSE	FALSE	FALSE	ebi-a-GCST004692	11	117864063	0.0247	36052	0.6457	Amyotrophic lateral sclerosis || id:ebi-a-GCST004692	Amyotrophic lateral sclerosis	Amyotrophic lateral sclerosis || ||	TRUE	igd	NA	NA	NA	NA	NA	NA	NA	90274795	2223	0.0154	3.39e-25	14744	90274795	TRUE	reported	rQHPNn	90274795	2	TRUE	NA	NA	0.00724195	14744	5.91e-06	36052	TRUE
150	rs3769274	A	G	A	G	0.0771	-0.011	0.8403	NA	FALSE	FALSE	FALSE	ebi-a-GCST004692	2	173757986	0.0242	36052	0.6506	Amyotrophic lateral sclerosis || id:ebi-a-GCST004692	Amyotrophic lateral sclerosis	Amyotrophic lateral sclerosis || ||	TRUE	igd	NA	NA	NA	NA	NA	NA	NA	90274795	42	0.0162	1.94e-06	14742	90274795	TRUE	reported	rQHPNn	90274795	2	TRUE	NA	NA	0.00153431	14742	5.73e-06	36052	TRUE
151	rs385697	T	C	T	C	0.0555	-0.0125	0.6126	NA	FALSE	FALSE	FALSE	ebi-a-GCST004692	6	7880027	0.0182	36052	0.4921	Amyotrophic lateral sclerosis || id:ebi-a-GCST004692	Amyotrophic lateral sclerosis	Amyotrophic lateral sclerosis || ||	TRUE	igd	NA	NA	NA	NA	NA	NA	NA	90274795	69	0.0119	3.1e-06	14727	90274795	TRUE	reported	rQHPNn	90274795	2	TRUE	NA	NA	0.00147501	14727	1.31e-05	36052	TRUE
152	rs389239	A	G	A	G	-0.0574	0.0074	0.6162	NA	FALSE	FALSE	FALSE	ebi-a-GCST004692	6	169465075	0.019	36052	0.697599	Amyotrophic lateral sclerosis || id:ebi-a-GCST004692	Amyotrophic lateral sclerosis	Amyotrophic lateral sclerosis || ||	TRUE	igd	NA	NA	NA	NA	NA	NA	NA	90274795	2169	0.0125	4.39e-06	14296	90274795	TRUE	reported	rQHPNn	90274795	2	TRUE	NA	NA	0.00147302	14296	4.21e-06	36052	TRUE
153	rs398518	A	G	A	G	-0.1293	0.0299	0.9146	NA	FALSE	FALSE	FALSE	ebi-a-GCST004692	3	8954959	0.0339	36052	0.377	Amyotrophic lateral sclerosis || id:ebi-a-GCST004692	Amyotrophic lateral sclerosis	Amyotrophic lateral sclerosis || ||	TRUE	igd	NA	NA	NA	NA	NA	NA	NA	90274795	46	0.0218	3.01e-09	14296	90274795	TRUE	reported	rQHPNn	90274795	2	TRUE	NA	NA	0.00245506	14296	2.16e-05	36052	TRUE
154	rs4655953	A	G	A	G	0.0565	-0.0202	0.3683	NA	FALSE	FALSE	FALSE	ebi-a-GCST004692	1	87832695	0.0182	36052	0.2669	Amyotrophic lateral sclerosis || id:ebi-a-GCST004692	Amyotrophic lateral sclerosis	Amyotrophic lateral sclerosis || ||	TRUE	igd	NA	NA	NA	NA	NA	NA	NA	90274795	4	0.0121	3.02e-06	14722	90274795	TRUE	reported	rQHPNn	90274795	2	TRUE	NA	NA	0.00147902	14722	3.42e-05	36052	TRUE
155	rs60534074	T	C	T	C	-0.0662	-0.0061	0.2151	NA	FALSE	FALSE	FALSE	ebi-a-GCST004692	1	206909005	0.0215	36052	0.7772	Amyotrophic lateral sclerosis || id:ebi-a-GCST004692	Amyotrophic lateral sclerosis	Amyotrophic lateral sclerosis || ||	TRUE	igd	NA	NA	NA	NA	NA	NA	NA	90274795	5	0.0145	4.98e-06	14295	90274795	TRUE	reported	rQHPNn	90274795	2	TRUE	NA	NA	0.00145621	14295	2.23e-06	36052	TRUE
156	rs66624860	T	C	T	C	0.0681	-0.0247	0.2791	NA	FALSE	FALSE	FALSE	ebi-a-GCST004692	8	61861039	0.0205	36052	0.2297	Amyotrophic lateral sclerosis || id:ebi-a-GCST004692	Amyotrophic lateral sclerosis	Amyotrophic lateral sclerosis || ||	TRUE	igd	NA	NA	NA	NA	NA	NA	NA	90274795	2173	0.0143	1.91e-06	12799	90274795	TRUE	reported	rQHPNn	90274795	2	TRUE	NA	NA	0.00176907	12799	4.03e-05	36052	TRUE
157	rs67037615	T	C	T	C	-0.1528	-0.0112	0.8893	NA	FALSE	FALSE	FALSE	ebi-a-GCST004692	6	32453163	0.0287	36052	0.6975	Amyotrophic lateral sclerosis || id:ebi-a-GCST004692	Amyotrophic lateral sclerosis	Amyotrophic lateral sclerosis || ||	TRUE	igd	NA	NA	NA	NA	NA	NA	NA	90274795	464	0.0196	6.39e-15	14296	90274795	TRUE	reported	rQHPNn	90274795	2	TRUE	NA	NA	0.00423388	14296	4.22e-06	36052	TRUE
158	rs72701782	A	G	A	G	0.0981	-0.0219	0.0999	NA	FALSE	FALSE	FALSE	ebi-a-GCST004692	4	185304872	0.0317	36052	0.4913	Amyotrophic lateral sclerosis || id:ebi-a-GCST004692	Amyotrophic lateral sclerosis	Amyotrophic lateral sclerosis || ||	TRUE	igd	NA	NA	NA	NA	NA	NA	NA	90274795	48	0.0211	3.33e-06	14296	90274795	TRUE	reported	rQHPNn	90274795	2	TRUE	NA	NA	0.00150995	14296	1.32e-05	36052	TRUE
159	rs76932862	T	C	T	C	0.1401	0.0209	0.1028	NA	FALSE	FALSE	FALSE	ebi-a-GCST004692	14	20318041	0.0406	36052	0.6069	Amyotrophic lateral sclerosis || id:ebi-a-GCST004692	Amyotrophic lateral sclerosis	Amyotrophic lateral sclerosis || ||	TRUE	igd	NA	NA	NA	NA	NA	NA	NA	90274795	2238	0.0291	1.48e-06	12412	90274795	TRUE	reported	rQHPNn	90274795	2	TRUE	NA	NA	0.00186427	12412	7.35e-06	36052	TRUE
160	rs77654292	T	C	T	C	0.1735	0.046	0.027	NA	FALSE	FALSE	FALSE	ebi-a-GCST004692	1	206974552	0.0598	36052	0.4415	Amyotrophic lateral sclerosis || id:ebi-a-GCST004692	Amyotrophic lateral sclerosis	Amyotrophic lateral sclerosis || ||	TRUE	igd	NA	NA	NA	NA	NA	NA	NA	90274795	34	0.0374	3.5e-06	14731	90274795	TRUE	reported	rQHPNn	90274795	2	TRUE	NA	NA	0.00145898	14731	1.64e-05	36052	TRUE
161	rs1034059	A	G	A	G	0.076	0.0074	0.6981	NA	FALSE	FALSE	FALSE	ebi-a-GCST004692	6	158193698	0.0217	36052	0.733199	Amyotrophic lateral sclerosis || id:ebi-a-GCST004692	Amyotrophic lateral sclerosis	Amyotrophic lateral sclerosis || ||	TRUE	igd	NA	NA	NA	NA	NA	NA	NA	90274834	16	0.0145	1.59e-07	14288	90274834	TRUE	reported	uyS46A	90274834	2	TRUE	NA	NA	0.00191931	14288	3.23e-06	36052	TRUE
162	rs11115639	A	C	A	C	-0.0841	-0.0286	0.8864	NA	FALSE	FALSE	FALSE	ebi-a-GCST004692	12	83600525	0.0282	36052	0.3098	Amyotrophic lateral sclerosis || id:ebi-a-GCST004692	Amyotrophic lateral sclerosis	Amyotrophic lateral sclerosis || ||	TRUE	igd	NA	NA	NA	NA	NA	NA	NA	90274834	30	0.0184	4.86e-06	14730	90274834	TRUE	reported	uyS46A	90274834	2	TRUE	NA	NA	0.00141644	14730	2.85e-05	36052	TRUE
163	rs115455827	A	G	A	G	0.1277	-0.0397	0.9506	NA	FALSE	FALSE	FALSE	ebi-a-GCST004692	5	78787853	0.0458	36052	0.3866	Amyotrophic lateral sclerosis || id:ebi-a-GCST004692	Amyotrophic lateral sclerosis	Amyotrophic lateral sclerosis || ||	TRUE	igd	NA	NA	NA	NA	NA	NA	NA	90274834	8	0.0277	4.02e-06	14735	90274834	TRUE	reported	uyS46A	90274834	2	TRUE	NA	NA	0.00144047	14735	2.08e-05	36052	TRUE
164	rs116198125	T	C	T	C	-0.1521	-0.0159	0.9617	NA	FALSE	FALSE	FALSE	ebi-a-GCST004692	3	14613224	0.0504	36052	0.7523	Amyotrophic lateral sclerosis || id:ebi-a-GCST004692	Amyotrophic lateral sclerosis	Amyotrophic lateral sclerosis || ||	TRUE	igd	NA	NA	NA	NA	NA	NA	NA	90274834	4	0.0329	3.78e-06	14727	90274834	TRUE	reported	uyS46A	90274834	2	TRUE	NA	NA	0.00144938	14727	2.76e-06	36052	TRUE
165	rs12152184	A	G	A	G	0.0965	-0.0217	0.885	NA	FALSE	FALSE	FALSE	ebi-a-GCST004692	22	45002809	0.0286	36052	0.4481	Amyotrophic lateral sclerosis || id:ebi-a-GCST004692	Amyotrophic lateral sclerosis	Amyotrophic lateral sclerosis || ||	TRUE	igd	NA	NA	NA	NA	NA	NA	NA	90274834	66	0.0208	3.49e-06	12402	90274834	TRUE	reported	uyS46A	90274834	2	TRUE	NA	NA	0.00173282	12402	1.6e-05	36052	TRUE
166	rs12460327	C	G	C	G	-0.0751	-0.0166	0.8169	NA	FALSE	TRUE	TRUE	ebi-a-GCST004692	19	39410986	0.0232	36052	0.4743	Amyotrophic lateral sclerosis || id:ebi-a-GCST004692	Amyotrophic lateral sclerosis	Amyotrophic lateral sclerosis || ||	TRUE	igd	NA	NA	NA	NA	NA	NA	NA	90274834	52	0.0152	7.78e-07	14727	90274834	TRUE	reported	uyS46A	90274834	2	FALSE	NA	NA	0.00165508	14727	1.42e-05	36052	TRUE
167	rs12531843	C	G	C	G	-0.1286	0.0185	0.9177	NA	FALSE	TRUE	TRUE	ebi-a-GCST004692	7	14143486	0.0328	36052	0.5721	Amyotrophic lateral sclerosis || id:ebi-a-GCST004692	Amyotrophic lateral sclerosis	Amyotrophic lateral sclerosis || ||	TRUE	igd	NA	NA	NA	NA	NA	NA	NA	90274834	17	0.0243	1.21e-07	12404	90274834	TRUE	reported	uyS46A	90274834	2	FALSE	NA	NA	0.00225319	12404	8.82e-06	36052	TRUE
168	rs138897138	A	G	A	G	0.104	0.0247	0.9138	NA	FALSE	FALSE	FALSE	ebi-a-GCST004692	2	122731427	0.0312	36052	0.4289	Amyotrophic lateral sclerosis || id:ebi-a-GCST004692	Amyotrophic lateral sclerosis	Amyotrophic lateral sclerosis || ||	TRUE	igd	NA	NA	NA	NA	NA	NA	NA	90274834	2	0.0218	1.84e-06	14288	90274834	TRUE	reported	uyS46A	90274834	2	TRUE	NA	NA	0.00159057	14288	1.74e-05	36052	TRUE
169	rs60459634	A	G	A	G	-0.1063	0.0165	0.0886	NA	FALSE	FALSE	FALSE	ebi-a-GCST004692	4	160629137	0.0369	36052	0.654501	Amyotrophic lateral sclerosis || id:ebi-a-GCST004692	Amyotrophic lateral sclerosis	Amyotrophic lateral sclerosis || ||	TRUE	igd	NA	NA	NA	NA	NA	NA	NA	90274834	7	0.0229	3.45e-06	14288	90274834	TRUE	reported	uyS46A	90274834	2	TRUE	NA	NA	0.00150602	14288	5.55e-06	36052	TRUE
170	rs7718478	A	T	A	T	0.0639	-0.0124	0.7496	NA	FALSE	TRUE	TRUE	ebi-a-GCST004692	5	177560339	0.0208	36052	0.5512	Amyotrophic lateral sclerosis || id:ebi-a-GCST004692	Amyotrophic lateral sclerosis	Amyotrophic lateral sclerosis || ||	TRUE	igd	NA	NA	NA	NA	NA	NA	NA	90274834	11	0.0138	3.65e-06	14288	90274834	TRUE	reported	uyS46A	90274834	2	FALSE	NA	NA	0.00149859	14288	9.86e-06	36052	TRUE
171	rs77381020	T	C	T	C	0.0862	-0.0076	0.8546	NA	FALSE	FALSE	FALSE	ebi-a-GCST004692	13	37413465	0.0279	36052	0.786901	Amyotrophic lateral sclerosis || id:ebi-a-GCST004692	Amyotrophic lateral sclerosis	Amyotrophic lateral sclerosis || ||	TRUE	igd	NA	NA	NA	NA	NA	NA	NA	90274834	32	0.0184	2.8e-06	14288	90274834	TRUE	reported	uyS46A	90274834	2	TRUE	NA	NA	0.00153392	14288	2.06e-06	36052	TRUE
172	rs1072074	A	G	A	G	-0.0649	-0.0042	0.5847	NA	FALSE	FALSE	FALSE	ebi-a-GCST004692	4	24758319	0.021	36052	0.8403	Amyotrophic lateral sclerosis || id:ebi-a-GCST004692	Amyotrophic lateral sclerosis	Amyotrophic lateral sclerosis || ||	TRUE	igd	NA	NA	NA	NA	NA	NA	NA	90274802	17	0.0141	4.17e-06	11785	90274802	TRUE	reported	wqX5i1	90274802	2	TRUE	NA	NA	0.0017948	11785	1.11e-06	36052	TRUE
173	rs10870773	A	G	A	G	-0.0816	-0.0077	0.8025	NA	FALSE	FALSE	FALSE	ebi-a-GCST004692	13	44396409	0.0234	36052	0.742	Amyotrophic lateral sclerosis || id:ebi-a-GCST004692	Amyotrophic lateral sclerosis	Amyotrophic lateral sclerosis || ||	TRUE	igd	NA	NA	NA	NA	NA	NA	NA	90274802	148	0.0171	1.82e-06	11345	90274802	TRUE	reported	wqX5i1	90274802	2	TRUE	NA	NA	0.0020035	11345	3e-06	36052	TRUE
174	rs114882743	A	T	A	T	-0.3259	-0.0496	0.9804	NA	FALSE	TRUE	TRUE	ebi-a-GCST004692	1	176930254	0.0794	36052	0.5322	Amyotrophic lateral sclerosis || id:ebi-a-GCST004692	Amyotrophic lateral sclerosis	Amyotrophic lateral sclerosis || ||	TRUE	igd	NA	NA	NA	NA	NA	NA	NA	90274802	4	0.0548	2.73e-09	11345	90274802	TRUE	reported	wqX5i1	90274802	2	FALSE	NA	NA	0.00310833	11345	1.08e-05	36052	TRUE
175	rs11931996	T	C	T	C	-0.1219	0.0349	0.9068	NA	FALSE	FALSE	FALSE	ebi-a-GCST004692	4	152291909	0.0343	36052	0.3093	Amyotrophic lateral sclerosis || id:ebi-a-GCST004692	Amyotrophic lateral sclerosis	Amyotrophic lateral sclerosis || ||	TRUE	igd	NA	NA	NA	NA	NA	NA	NA	90274802	18	0.0262	3.28e-06	11345	90274802	TRUE	reported	wqX5i1	90274802	2	TRUE	NA	NA	0.0019048	11345	2.87e-05	36052	TRUE
176	rs12092228	T	G	T	G	0.1508	-0.0152	0.0512	NA	FALSE	FALSE	FALSE	ebi-a-GCST004692	1	242536005	0.0422	36052	0.7191	Amyotrophic lateral sclerosis || id:ebi-a-GCST004692	Amyotrophic lateral sclerosis	Amyotrophic lateral sclerosis || ||	TRUE	igd	NA	NA	NA	NA	NA	NA	NA	90274802	6	0.0327	4e-06	9892	90274802	TRUE	reported	wqX5i1	90274802	2	TRUE	NA	NA	0.00214574	9892	3.6e-06	36052	TRUE
177	rs12445031	C	G	C	G	-0.09	0.0414	0.1382	NA	FALSE	TRUE	TRUE	ebi-a-GCST004692	16	76626873	0.0263	36052	0.115	Amyotrophic lateral sclerosis || id:ebi-a-GCST004692	Amyotrophic lateral sclerosis	Amyotrophic lateral sclerosis || ||	TRUE	igd	NA	NA	NA	NA	NA	NA	NA	90274802	172	0.0195	3.92e-06	11339	90274802	TRUE	reported	wqX5i1	90274802	2	FALSE	NA	NA	0.00187544	11339	6.87e-05	36052	TRUE
178	rs12863903	T	C	T	C	-0.0857	-0.0099	0.1597	NA	FALSE	FALSE	FALSE	ebi-a-GCST004692	13	96638651	0.0236	36052	0.675899	Amyotrophic lateral sclerosis || id:ebi-a-GCST004692	Amyotrophic lateral sclerosis	Amyotrophic lateral sclerosis || ||	TRUE	igd	NA	NA	NA	NA	NA	NA	NA	90274802	155	0.018	1.93e-06	11345	90274802	TRUE	reported	wqX5i1	90274802	2	TRUE	NA	NA	0.00199444	11345	4.88e-06	36052	TRUE
179	rs12895022	T	C	T	C	0.1091	-0.0466	0.0906	NA	FALSE	FALSE	FALSE	ebi-a-GCST004692	14	102333234	0.032	36052	0.1456	Amyotrophic lateral sclerosis || id:ebi-a-GCST004692	Amyotrophic lateral sclerosis	Amyotrophic lateral sclerosis || ||	TRUE	igd	NA	NA	NA	NA	NA	NA	NA	90274802	164	0.0236	3.78e-06	11774	90274802	TRUE	reported	wqX5i1	90274802	2	TRUE	NA	NA	0.00181212	11774	5.88e-05	36052	TRUE
180	rs143118566	A	G	A	G	-0.2336	0.0831	0.9734	NA	FALSE	FALSE	FALSE	ebi-a-GCST004692	16	593000	0.0839	36052	0.3222	Amyotrophic lateral sclerosis || id:ebi-a-GCST004692	Amyotrophic lateral sclerosis	Amyotrophic lateral sclerosis || ||	TRUE	igd	NA	NA	NA	NA	NA	NA	NA	90274802	168	0.0508	4.26e-06	10281	90274802	TRUE	reported	wqX5i1	90274802	2	TRUE	NA	NA	0.00205293	10281	2.72e-05	36052	TRUE
181	rs149756404	A	C	A	C	-0.2749	-0.0555	0.9809	NA	FALSE	FALSE	FALSE	ebi-a-GCST004692	2	239715033	0.063	36052	0.3781	Amyotrophic lateral sclerosis || id:ebi-a-GCST004692	Amyotrophic lateral sclerosis	Amyotrophic lateral sclerosis || ||	TRUE	igd	NA	NA	NA	NA	NA	NA	NA	90274802	11	0.0524	1.55e-07	11302	90274802	TRUE	reported	wqX5i1	90274802	2	TRUE	NA	NA	0.0024297	11302	2.15e-05	36052	TRUE
182	rs17700884	T	G	T	G	-0.105	-0.0213	0.3783	NA	FALSE	FALSE	FALSE	ebi-a-GCST004692	16	88684495	0.0187	36052	0.2552	Amyotrophic lateral sclerosis || id:ebi-a-GCST004692	Amyotrophic lateral sclerosis	Amyotrophic lateral sclerosis || ||	TRUE	igd	NA	NA	NA	NA	NA	NA	NA	90274802	216	0.0136	1.16e-14	11775	90274802	TRUE	reported	wqX5i1	90274802	2	TRUE	NA	NA	0.00503756	11775	3.6e-05	36052	TRUE
183	rs1920106	T	C	T	C	0.0633	-0.0046	0.3948	NA	FALSE	FALSE	FALSE	ebi-a-GCST004692	7	21240100	0.0182	36052	0.7987	Amyotrophic lateral sclerosis || id:ebi-a-GCST004692	Amyotrophic lateral sclerosis	Amyotrophic lateral sclerosis || ||	TRUE	igd	NA	NA	NA	NA	NA	NA	NA	90274802	133	0.0132	1.62e-06	11792	90274802	TRUE	reported	wqX5i1	90274802	2	TRUE	NA	NA	0.0019467	11792	1.77e-06	36052	TRUE
184	rs199658824	T	TG	T	TG	-0.2362	-0.0009	0.9733	NA	FALSE	FALSE	FALSE	ebi-a-GCST004692	12	52739413	0.0535	36052	0.9862	Amyotrophic lateral sclerosis || id:ebi-a-GCST004692	Amyotrophic lateral sclerosis	Amyotrophic lateral sclerosis || ||	TRUE	igd	NA	NA	NA	NA	NA	NA	NA	90274802	141	0.0468	4.49e-07	8391	90274802	TRUE	reported	wqX5i1	90274802	2	TRUE	NA	NA	0.0030272	8391	7.85e-09	36052	TRUE
185	rs2814092	C	G	C	G	0.0624	-0.0074	0.6437	NA	FALSE	TRUE	TRUE	ebi-a-GCST004692	6	66547346	0.0185	36052	0.687999	Amyotrophic lateral sclerosis || id:ebi-a-GCST004692	Amyotrophic lateral sclerosis	Amyotrophic lateral sclerosis || ||	TRUE	igd	NA	NA	NA	NA	NA	NA	NA	90274802	132	0.0135	3.8e-06	11792	90274802	TRUE	reported	wqX5i1	90274802	2	FALSE	NA	NA	0.00180885	11792	4.44e-06	36052	TRUE
186	rs39779	C	G	C	G	0.1077	-0.0031	0.1032	NA	FALSE	TRUE	TRUE	ebi-a-GCST004692	16	8393906	0.0316	36052	0.9209	Amyotrophic lateral sclerosis || id:ebi-a-GCST004692	Amyotrophic lateral sclerosis	Amyotrophic lateral sclerosis || ||	TRUE	igd	NA	NA	NA	NA	NA	NA	NA	90274802	169	0.0227	2.09e-06	11345	90274802	TRUE	reported	wqX5i1	90274802	2	FALSE	NA	NA	0.00198057	11345	2.67e-07	36052	TRUE
187	rs59356989	A	G	A	G	-0.0882	0.0182	0.8432	NA	FALSE	FALSE	FALSE	ebi-a-GCST004692	5	107423766	0.0248	36052	0.4623	Amyotrophic lateral sclerosis || id:ebi-a-GCST004692	Amyotrophic lateral sclerosis	Amyotrophic lateral sclerosis || ||	TRUE	igd	NA	NA	NA	NA	NA	NA	NA	90274802	47	0.0177	6.26e-07	11790	90274802	TRUE	reported	wqX5i1	90274802	2	TRUE	NA	NA	0.00210202	11790	1.49e-05	36052	TRUE
188	rs72815428	T	C	T	C	-0.1673	-0.0173	0.0423	NA	FALSE	FALSE	FALSE	ebi-a-GCST004692	5	174836306	0.0484	36052	0.7205	Amyotrophic lateral sclerosis || id:ebi-a-GCST004692	Amyotrophic lateral sclerosis	Amyotrophic lateral sclerosis || ||	TRUE	igd	NA	NA	NA	NA	NA	NA	NA	90274802	128	0.0366	4.85e-06	11775	90274802	TRUE	reported	wqX5i1	90274802	2	TRUE	NA	NA	0.00177163	11775	3.54e-06	36052	TRUE
189	rs75246422	T	C	T	C	-0.0951	-0.0089	0.1233	NA	FALSE	FALSE	FALSE	ebi-a-GCST004692	5	174179760	0.0281	36052	0.7502	Amyotrophic lateral sclerosis || id:ebi-a-GCST004692	Amyotrophic lateral sclerosis	Amyotrophic lateral sclerosis || ||	TRUE	igd	NA	NA	NA	NA	NA	NA	NA	90274802	126	0.0201	2.23e-06	11793	90274802	TRUE	reported	wqX5i1	90274802	2	TRUE	NA	NA	0.00189494	11793	2.78e-06	36052	TRUE
190	rs77654242	T	G	T	G	-0.2174	-0.0433	0.9707	NA	FALSE	FALSE	FALSE	ebi-a-GCST004692	2	136675328	0.0566	36052	0.4437	Amyotrophic lateral sclerosis || id:ebi-a-GCST004692	Amyotrophic lateral sclerosis	Amyotrophic lateral sclerosis || ||	TRUE	igd	NA	NA	NA	NA	NA	NA	NA	90274802	7	0.0469	3.56e-06	10294	90274802	TRUE	reported	wqX5i1	90274802	2	TRUE	NA	NA	0.00208338	10294	1.62e-05	36052	TRUE
191	rs8015296	C	G	C	G	-0.1162	0.0035	0.0991	NA	FALSE	TRUE	TRUE	ebi-a-GCST004692	14	92763907	0.0294	36052	0.9049	Amyotrophic lateral sclerosis || id:ebi-a-GCST004692	Amyotrophic lateral sclerosis	Amyotrophic lateral sclerosis || ||	TRUE	igd	NA	NA	NA	NA	NA	NA	NA	90274802	162	0.0253	4.37e-06	9461	90274802	TRUE	reported	wqX5i1	90274802	2	FALSE	NA	NA	0.00222515	9461	3.93e-07	36052	TRUE
192	rs116928468	A	G	A	G	-0.2566	0.0685	0.019	NA	FALSE	FALSE	FALSE	ebi-a-GCST004692	17	75178814	0.0818	36052	0.4026	Amyotrophic lateral sclerosis || id:ebi-a-GCST004692	Amyotrophic lateral sclerosis	Amyotrophic lateral sclerosis || ||	TRUE	igd	NA	NA	NA	NA	NA	NA	NA	90274831	1052	0.0536	1.69e-06	11770	90274831	TRUE	reported	WVwV6m	90274831	2	TRUE	NA	NA	0.00194373	11770	1.95e-05	36052	TRUE
193	rs2285179	A	G	A	G	-0.0663	-0.0056	0.5586	NA	FALSE	FALSE	FALSE	ebi-a-GCST004692	22	38211954	0.0178	36052	0.7533	Amyotrophic lateral sclerosis || id:ebi-a-GCST004692	Amyotrophic lateral sclerosis	Amyotrophic lateral sclerosis || ||	TRUE	igd	NA	NA	NA	NA	NA	NA	NA	90274831	1122	0.0122	5.5e-08	14288	90274831	TRUE	reported	WVwV6m	90274831	2	TRUE	NA	NA	0.002063	14288	2.75e-06	36052	TRUE
194	rs2511241	T	C	T	C	0.177	-0.0055	0.9163	NA	FALSE	FALSE	FALSE	ebi-a-GCST004692	11	72945341	0.037	36052	0.8822	Amyotrophic lateral sclerosis || id:ebi-a-GCST004692	Amyotrophic lateral sclerosis	Amyotrophic lateral sclerosis || ||	TRUE	igd	NA	NA	NA	NA	NA	NA	NA	90274831	444	0.0236	6.38e-14	13668	90274831	TRUE	reported	WVwV6m	90274831	2	TRUE	NA	NA	0.00409918	13668	6.13e-07	36052	TRUE
195	rs28444486	A	G	A	G	0.0636	0.0104	0.7378	NA	FALSE	FALSE	FALSE	ebi-a-GCST004692	22	49231540	0.0207	36052	0.6145	Amyotrophic lateral sclerosis || id:ebi-a-GCST004692	Amyotrophic lateral sclerosis	Amyotrophic lateral sclerosis || ||	TRUE	igd	NA	NA	NA	NA	NA	NA	NA	90274831	1198	0.0136	2.92e-06	14735	90274831	TRUE	reported	WVwV6m	90274831	2	TRUE	NA	NA	0.00148218	14735	7e-06	36052	TRUE
196	rs370767	C	G	C	G	0.06	0.0193	0.4697	NA	FALSE	TRUE	TRUE	ebi-a-GCST004692	22	23239868	0.0187	36052	0.3006	Amyotrophic lateral sclerosis || id:ebi-a-GCST004692	Amyotrophic lateral sclerosis	Amyotrophic lateral sclerosis || ||	TRUE	igd	NA	NA	NA	NA	NA	NA	NA	90274831	1055	0.0131	4.65e-06	13224	90274831	TRUE	reported	WVwV6m	90274831	2	FALSE	NA	NA	0.00158407	13224	2.95e-05	36052	TRUE
197	rs3859189	A	G	A	G	0.1101	-0.011	0.5367	NA	FALSE	FALSE	FALSE	ebi-a-GCST004692	17	38137033	0.0177	36052	0.535499	Amyotrophic lateral sclerosis || id:ebi-a-GCST004692	Amyotrophic lateral sclerosis	Amyotrophic lateral sclerosis || ||	TRUE	igd	NA	NA	NA	NA	NA	NA	NA	90274831	881	0.0117	4.95e-21	14729	90274831	TRUE	reported	WVwV6m	90274831	2	TRUE	NA	NA	0.00597703	14729	1.07e-05	36052	TRUE
198	rs4779338	A	G	A	G	0.1274	0.0877	0.211	NA	FALSE	FALSE	FALSE	ebi-a-GCST004692	15	22508018	0.0334	36052	0.008689	Amyotrophic lateral sclerosis || id:ebi-a-GCST004692	Amyotrophic lateral sclerosis	Amyotrophic lateral sclerosis || ||	TRUE	igd	NA	NA	NA	NA	NA	NA	NA	90274831	699	0.0276	3.91e-06	8491	90274831	TRUE	reported	WVwV6m	90274831	2	TRUE	NA	NA	0.00250366	8491	0.000191213	36052	TRUE
199	rs4823082	C	G	C	G	-0.159	0.0857	0.0363	NA	FALSE	TRUE	TRUE	ebi-a-GCST004692	22	30600105	0.0589	36052	0.1459	Amyotrophic lateral sclerosis || id:ebi-a-GCST004692	Amyotrophic lateral sclerosis	Amyotrophic lateral sclerosis || ||	TRUE	igd	NA	NA	NA	NA	NA	NA	NA	90274831	1056	0.0346	4.32e-06	14724	90274831	TRUE	reported	WVwV6m	90274831	2	FALSE	NA	NA	0.00143236	14724	5.87e-05	36052	TRUE
200	rs559651	T	C	T	C	-0.0594	-0.0424	0.6496	NA	FALSE	FALSE	FALSE	ebi-a-GCST004692	8	41555366	0.0188	36052	0.0240099	Amyotrophic lateral sclerosis || id:ebi-a-GCST004692	Amyotrophic lateral sclerosis	Amyotrophic lateral sclerosis || ||	TRUE	igd	NA	NA	NA	NA	NA	NA	NA	90274831	392	0.0125	2.01e-06	14715	90274831	TRUE	reported	WVwV6m	90274831	2	TRUE	NA	NA	0.00153245	14715	0.000141075	36052	TRUE
201	rs61897429	A	G	A	G	-0.0847	0.0203	0.139	NA	FALSE	FALSE	FALSE	ebi-a-GCST004692	11	47424864	0.025	36052	0.4174	Amyotrophic lateral sclerosis || id:ebi-a-GCST004692	Amyotrophic lateral sclerosis	Amyotrophic lateral sclerosis || ||	TRUE	igd	NA	NA	NA	NA	NA	NA	NA	90274831	415	0.017	6.28e-07	14735	90274831	TRUE	reported	WVwV6m	90274831	2	TRUE	NA	NA	0.00168208	14735	1.83e-05	36052	TRUE
202	rs653178	T	C	T	C	-0.0728	0.0464	0.5224	NA	FALSE	FALSE	FALSE	ebi-a-GCST004692	12	112007756	0.0177	36052	0.00879691	Amyotrophic lateral sclerosis || id:ebi-a-GCST004692	Amyotrophic lateral sclerosis	Amyotrophic lateral sclerosis || ||	TRUE	igd	NA	NA	NA	NA	NA	NA	NA	90274831	457	0.0132	3.48e-08	11785	90274831	TRUE	reported	WVwV6m	90274831	2	TRUE	NA	NA	0.00257478	11785	0.000190591	36052	TRUE
203	rs7102957	T	C	T	C	-0.0803	-0.0035	0.8631	NA	FALSE	FALSE	FALSE	ebi-a-GCST004692	11	102334152	0.0259	36052	0.8937	Amyotrophic lateral sclerosis || id:ebi-a-GCST004692	Amyotrophic lateral sclerosis	Amyotrophic lateral sclerosis || ||	TRUE	igd	NA	NA	NA	NA	NA	NA	NA	90274831	447	0.0173	3.46e-06	14288	90274831	TRUE	reported	WVwV6m	90274831	2	TRUE	NA	NA	0.00150582	14288	5.07e-07	36052	TRUE
204	rs74472890	T	C	T	C	-0.1426	-0.0419	0.9471	NA	FALSE	FALSE	FALSE	ebi-a-GCST004692	11	72946279	0.0479	36052	0.3818	Amyotrophic lateral sclerosis || id:ebi-a-GCST004692	Amyotrophic lateral sclerosis	Amyotrophic lateral sclerosis || ||	TRUE	igd	NA	NA	NA	NA	NA	NA	NA	90274831	446	0.0281	3.88e-07	14735	90274831	TRUE	reported	WVwV6m	90274831	2	TRUE	NA	NA	0.00174493	14735	2.12e-05	36052	TRUE
205	rs80303768	A	G	A	G	-0.152	0.0007	0.0371	NA	FALSE	FALSE	FALSE	ebi-a-GCST004692	21	42594678	0.0469	36052	0.9876	Amyotrophic lateral sclerosis || id:ebi-a-GCST004692	Amyotrophic lateral sclerosis	Amyotrophic lateral sclerosis || ||	TRUE	igd	NA	NA	NA	NA	NA	NA	NA	90274831	1054	0.0327	3.35e-06	14722	90274831	TRUE	reported	WVwV6m	90274831	2	TRUE	NA	NA	0.00146571	14722	6.18e-09	36052	TRUE
206	rs9264931	T	C	T	C	-0.1048	-0.0202	0.8812	NA	FALSE	FALSE	FALSE	ebi-a-GCST004692	6	31274196	0.0275	36052	0.4626	Amyotrophic lateral sclerosis || id:ebi-a-GCST004692	Amyotrophic lateral sclerosis	Amyotrophic lateral sclerosis || ||	TRUE	igd	NA	NA	NA	NA	NA	NA	NA	90274831	258	0.0191	4.09e-08	14736	90274831	TRUE	reported	WVwV6m	90274831	2	TRUE	NA	NA	0.00203915	14736	1.5e-05	36052	TRUE
207	rs10901252	C	G	C	G	0.2068	-0.095	0.0963	NA	FALSE	TRUE	TRUE	ebi-a-GCST004692	9	136128000	0.0339	36052	0.00506104	Amyotrophic lateral sclerosis || id:ebi-a-GCST004692	Amyotrophic lateral sclerosis	Amyotrophic lateral sclerosis || ||	TRUE	igd	NA	NA	NA	NA	NA	NA	NA	90274820	224	0.0213	2.76e-22	11779	90274820	TRUE	reported	ZZdRDI	90274820	2	FALSE	NA	NA	0.00794045	11779	0.000217795	36052	TRUE
208	rs115938660	T	C	T	C	-0.2181	0.0204	0.0215	NA	FALSE	FALSE	FALSE	ebi-a-GCST004692	5	110784241	0.0744	36052	0.7842	Amyotrophic lateral sclerosis || id:ebi-a-GCST004692	Amyotrophic lateral sclerosis	Amyotrophic lateral sclerosis || ||	TRUE	igd	NA	NA	NA	NA	NA	NA	NA	90274820	62	0.0467	3.01e-06	11770	90274820	TRUE	reported	ZZdRDI	90274820	2	TRUE	NA	NA	0.00185	11770	2.09e-06	36052	TRUE
209	rs117117000	A	G	A	G	0.1586	-0.046	0.961	NA	FALSE	FALSE	FALSE	ebi-a-GCST004692	8	119917062	0.0568	36052	0.4177	Amyotrophic lateral sclerosis || id:ebi-a-GCST004692	Amyotrophic lateral sclerosis	Amyotrophic lateral sclerosis || ||	TRUE	igd	NA	NA	NA	NA	NA	NA	NA	90274820	69	0.0333	1.91e-06	11784	90274820	TRUE	reported	ZZdRDI	90274820	2	TRUE	NA	NA	0.0019216	11784	1.82e-05	36052	TRUE
210	rs12754806	A	G	A	G	0.0563	-0.0164	0.4817	NA	FALSE	FALSE	FALSE	ebi-a-GCST004692	1	238821453	0.0176	36052	0.3505	Amyotrophic lateral sclerosis || id:ebi-a-GCST004692	Amyotrophic lateral sclerosis	Amyotrophic lateral sclerosis || ||	TRUE	igd	NA	NA	NA	NA	NA	NA	NA	90274820	2	0.0122	3.94e-06	11768	90274820	TRUE	reported	ZZdRDI	90274820	2	TRUE	NA	NA	0.00180669	11768	2.41e-05	36052	TRUE
211	rs141933232	A	G	A	G	-0.2724	-0.0468	0.0169	NA	FALSE	FALSE	FALSE	ebi-a-GCST004692	17	36964094	0.0669	36052	0.4842	Amyotrophic lateral sclerosis || id:ebi-a-GCST004692	Amyotrophic lateral sclerosis	Amyotrophic lateral sclerosis || ||	TRUE	igd	NA	NA	NA	NA	NA	NA	NA	90274820	647	0.0546	6.07e-07	11724	90274820	TRUE	reported	ZZdRDI	90274820	2	TRUE	NA	NA	0.00211888	11724	1.36e-05	36052	TRUE
212	rs1690678	A	C	A	C	0.0904	0.0022	0.1109	NA	FALSE	FALSE	FALSE	ebi-a-GCST004692	10	27930818	0.0277	36052	0.9353	Amyotrophic lateral sclerosis || id:ebi-a-GCST004692	Amyotrophic lateral sclerosis	Amyotrophic lateral sclerosis || ||	TRUE	igd	NA	NA	NA	NA	NA	NA	NA	90274820	596	0.0192	2.5e-06	11784	90274820	TRUE	reported	ZZdRDI	90274820	2	TRUE	NA	NA	0.00187802	11784	1.75e-07	36052	TRUE
213	rs2289779	T	G	T	G	0.0788	0.0033	0.5419	NA	FALSE	FALSE	FALSE	ebi-a-GCST004692	5	38527228	0.0179	36052	0.8558	Amyotrophic lateral sclerosis || id:ebi-a-GCST004692	Amyotrophic lateral sclerosis	Amyotrophic lateral sclerosis || ||	TRUE	igd	NA	NA	NA	NA	NA	NA	NA	90274820	54	0.0134	4.09e-09	11336	90274820	TRUE	reported	ZZdRDI	90274820	2	TRUE	NA	NA	0.00304184	11336	9.43e-07	36052	TRUE
214	rs3963364	A	C	A	C	-0.0951	0.0082	0.1784	NA	FALSE	FALSE	FALSE	ebi-a-GCST004692	3	12385357	0.0223	36052	0.714301	Amyotrophic lateral sclerosis || id:ebi-a-GCST004692	Amyotrophic lateral sclerosis	Amyotrophic lateral sclerosis || ||	TRUE	igd	NA	NA	NA	NA	NA	NA	NA	90274820	5	0.0203	2.8e-06	9453	90274820	TRUE	reported	ZZdRDI	90274820	2	TRUE	NA	NA	0.00231678	9453	3.75e-06	36052	TRUE
215	rs4937122	T	G	T	G	0.1262	0.0429	0.9129	NA	FALSE	FALSE	FALSE	ebi-a-GCST004692	11	126228659	0.0335	36052	0.2007	Amyotrophic lateral sclerosis || id:ebi-a-GCST004692	Amyotrophic lateral sclerosis	Amyotrophic lateral sclerosis || ||	TRUE	igd	NA	NA	NA	NA	NA	NA	NA	90274820	615	0.0248	3.61e-07	11336	90274820	TRUE	reported	ZZdRDI	90274820	2	TRUE	NA	NA	0.00227951	11336	4.55e-05	36052	TRUE
216	rs62258077	T	C	T	C	-0.063	-0.0102	0.6603	NA	FALSE	FALSE	FALSE	ebi-a-GCST004692	3	58363371	0.0181	36052	0.5749	Amyotrophic lateral sclerosis || id:ebi-a-GCST004692	Amyotrophic lateral sclerosis	Amyotrophic lateral sclerosis || ||	TRUE	igd	NA	NA	NA	NA	NA	NA	NA	90274820	24	0.013	1.26e-06	11762	90274820	TRUE	reported	ZZdRDI	90274820	2	TRUE	NA	NA	0.00199306	11762	8.81e-06	36052	TRUE
217	rs72730728	A	T	A	T	0.1414	-0.0653	0.9403	NA	FALSE	TRUE	TRUE	ebi-a-GCST004692	5	36424241	0.0426	36052	0.1255	Amyotrophic lateral sclerosis || id:ebi-a-GCST004692	Amyotrophic lateral sclerosis	Amyotrophic lateral sclerosis || ||	TRUE	igd	NA	NA	NA	NA	NA	NA	NA	90274820	34	0.0302	2.84e-06	11336	90274820	TRUE	reported	ZZdRDI	90274820	2	FALSE	NA	NA	0.00193047	11336	6.52e-05	36052	TRUE
218	rs72837682	T	C	T	C	-0.08	0.0031	0.7807	NA	FALSE	FALSE	FALSE	ebi-a-GCST004692	17	7063650	0.024	36052	0.8976	Amyotrophic lateral sclerosis || id:ebi-a-GCST004692	Amyotrophic lateral sclerosis	Amyotrophic lateral sclerosis || ||	TRUE	igd	NA	NA	NA	NA	NA	NA	NA	90274820	633	0.0172	3.3e-06	11336	90274820	TRUE	reported	ZZdRDI	90274820	2	TRUE	NA	NA	0.00190507	11336	4.63e-07	36052	TRUE
219	rs73157388	T	C	T	C	-0.1306	0.0228	0.9229	NA	FALSE	FALSE	FALSE	ebi-a-GCST004692	7	79349730	0.0412	36052	0.5797	Amyotrophic lateral sclerosis || id:ebi-a-GCST004692	Amyotrophic lateral sclerosis	Amyotrophic lateral sclerosis || ||	TRUE	igd	NA	NA	NA	NA	NA	NA	NA	90274820	65	0.0285	4.6e-06	11336	90274820	TRUE	reported	ZZdRDI	90274820	2	TRUE	NA	NA	0.00184931	11336	8.5e-06	36052	TRUE
220	rs778016	A	G	A	G	-0.0681	-0.0207	0.2875	NA	FALSE	FALSE	FALSE	ebi-a-GCST004692	6	68918580	0.0201	36052	0.3044	Amyotrophic lateral sclerosis || id:ebi-a-GCST004692	Amyotrophic lateral sclerosis	Amyotrophic lateral sclerosis || ||	TRUE	igd	NA	NA	NA	NA	NA	NA	NA	90274820	64	0.0145	2.65e-06	9883	90274820	TRUE	reported	ZZdRDI	90274820	2	TRUE	NA	NA	0.00222735	9883	2.94e-05	36052	TRUE
221	rs9313148	C	G	C	G	-0.0824	-0.0201	0.1414	NA	FALSE	TRUE	TRUE	ebi-a-GCST004692	5	6378192	0.0254	36052	0.4296	Amyotrophic lateral sclerosis || id:ebi-a-GCST004692	Amyotrophic lateral sclerosis	Amyotrophic lateral sclerosis || ||	TRUE	igd	NA	NA	NA	NA	NA	NA	NA	90274820	32	0.0173	1.91e-06	11777	90274820	TRUE	reported	ZZdRDI	90274820	2	FALSE	NA	NA	0.00192294	11777	1.74e-05	36052	TRUE
222	rs10207134	T	C	T	C	-0.0996	0.0368	0.326	0.3358	FALSE	FALSE	FALSE	ebi-a-GCST005647	2	228661828	0.0148	80610	0.01293	Amyotrophic lateral sclerosis || id:ebi-a-GCST005647	Amyotrophic lateral sclerosis	Amyotrophic lateral sclerosis || ||	TRUE	igd	NA	NA	NA	NA	NA	NA	NA	90274766	90	0.0128	7.18e-15	14287	90274766	TRUE	reported	7TARFz	90274766	2	TRUE	NA	NA	0.00422067	14287	7.67e-05	80610	TRUE
223	rs10837780	T	C	T	C	0.1191	-0.0439	0.9413	0.9379	FALSE	FALSE	FALSE	ebi-a-GCST005647	11	42142787	0.0301	80610	0.1443	Amyotrophic lateral sclerosis || id:ebi-a-GCST005647	Amyotrophic lateral sclerosis	Amyotrophic lateral sclerosis || ||	TRUE	igd	NA	NA	NA	NA	NA	NA	NA	90274766	182	0.026	4.63e-06	14288	90274766	TRUE	reported	7TARFz	90274766	2	TRUE	NA	NA	0.00146666	14288	2.64e-05	80610	TRUE
224	rs111674022	T	C	T	C	-0.0953	-0.0172	0.0967	0.0828	FALSE	FALSE	FALSE	ebi-a-GCST005647	1	238606022	0.0267	80610	0.518601	Amyotrophic lateral sclerosis || id:ebi-a-GCST005647	Amyotrophic lateral sclerosis	Amyotrophic lateral sclerosis || ||	TRUE	igd	NA	NA	NA	NA	NA	NA	NA	90274766	2	0.0208	4.61e-06	14288	90274766	TRUE	reported	7TARFz	90274766	2	TRUE	NA	NA	0.00146727	14288	5.15e-06	80610	TRUE
225	rs11242693	T	C	T	C	0.0637	0.0146	0.3674	0.3676	FALSE	FALSE	FALSE	ebi-a-GCST005647	6	1448190	0.0147	80610	0.3196	Amyotrophic lateral sclerosis || id:ebi-a-GCST005647	Amyotrophic lateral sclerosis	Amyotrophic lateral sclerosis || ||	TRUE	igd	NA	NA	NA	NA	NA	NA	NA	90274766	99	0.0135	2.38e-06	12404	90274766	TRUE	reported	7TARFz	90274766	2	TRUE	NA	NA	0.00179201	12404	1.22e-05	80610	TRUE
226	rs1129474	T	C	T	C	0.0573	0.0018	0.5396	0.5303	FALSE	FALSE	FALSE	ebi-a-GCST005647	8	22584718	0.0144	80610	0.8987	Amyotrophic lateral sclerosis || id:ebi-a-GCST005647	Amyotrophic lateral sclerosis	Amyotrophic lateral sclerosis || ||	TRUE	igd	NA	NA	NA	NA	NA	NA	NA	90274766	174	0.012	1.8e-06	14288	90274766	TRUE	reported	7TARFz	90274766	2	TRUE	NA	NA	0.00159347	14288	1.94e-07	80610	TRUE
227	rs11582772	T	C	T	C	0.2585	-0.0122	0.9859	0.9867	FALSE	FALSE	FALSE	ebi-a-GCST005647	1	32260562	0.066	80610	0.8536	Amyotrophic lateral sclerosis || id:ebi-a-GCST005647	Amyotrophic lateral sclerosis	Amyotrophic lateral sclerosis || ||	TRUE	igd	NA	NA	NA	NA	NA	NA	NA	90274766	1	0.0548	2.39e-06	14243	90274766	TRUE	reported	7TARFz	90274766	2	TRUE	NA	NA	0.00156006	14243	4.24e-07	80610	TRUE
228	rs117753190	C	G	C	G	-0.185	-0.0326	0.9688	0.967	FALSE	TRUE	FALSE	ebi-a-GCST005647	17	67136325	0.0419	80610	0.4361	Amyotrophic lateral sclerosis || id:ebi-a-GCST005647	Amyotrophic lateral sclerosis	Amyotrophic lateral sclerosis || ||	TRUE	igd	NA	NA	NA	NA	NA	NA	NA	90274766	197	0.0359	2.56e-07	14243	90274766	TRUE	reported	7TARFz	90274766	2	TRUE	NA	NA	0.00186125	14243	7.51e-06	80610	TRUE
229	rs117900576	C	G	C	G	-0.2256	-0.0411	0.9694	0.9712	FALSE	TRUE	FALSE	ebi-a-GCST005647	17	72761195	0.0598	80610	0.4922	Amyotrophic lateral sclerosis || id:ebi-a-GCST005647	Amyotrophic lateral sclerosis	Amyotrophic lateral sclerosis || ||	TRUE	igd	NA	NA	NA	NA	NA	NA	NA	90274766	201	0.0429	1.45e-07	13224	90274766	TRUE	reported	7TARFz	90274766	2	TRUE	NA	NA	0.00208718	13224	5.86e-06	80610	TRUE
230	rs13049624	A	G	A	G	-0.1315	-0.0658	0.9476	0.9408	FALSE	FALSE	FALSE	ebi-a-GCST005647	21	44005002	0.0306	80610	0.03145	Amyotrophic lateral sclerosis || id:ebi-a-GCST005647	Amyotrophic lateral sclerosis	Amyotrophic lateral sclerosis || ||	TRUE	igd	NA	NA	NA	NA	NA	NA	NA	90274766	206	0.0276	1.89e-06	14288	90274766	TRUE	reported	7TARFz	90274766	2	TRUE	NA	NA	0.00158647	14288	5.74e-05	80610	TRUE
231	rs151092565	T	C	T	C	-0.1512	-0.0385	0.0376	0.0414	FALSE	FALSE	FALSE	ebi-a-GCST005647	14	94625543	0.0363	80610	0.2886	Amyotrophic lateral sclerosis || id:ebi-a-GCST005647	Amyotrophic lateral sclerosis	Amyotrophic lateral sclerosis || ||	TRUE	igd	NA	NA	NA	NA	NA	NA	NA	90274766	187	0.0328	4.03e-06	14728	90274766	TRUE	reported	7TARFz	90274766	2	TRUE	NA	NA	0.00144094	14728	1.4e-05	80610	TRUE
232	rs2003431	A	T	A	T	-0.1602	0.0646	0.0632	0.0564	FALSE	TRUE	FALSE	ebi-a-GCST005647	14	106782532	0.0625	80610	0.3013	Amyotrophic lateral sclerosis || id:ebi-a-GCST005647	Amyotrophic lateral sclerosis	Amyotrophic lateral sclerosis || ||	TRUE	igd	NA	NA	NA	NA	NA	NA	NA	90274766	188	0.0344	3.21e-06	9786	90274766	TRUE	reported	7TARFz	90274766	2	TRUE	NA	NA	0.00221172	9786	1.33e-05	80610	TRUE
233	rs2796032	T	C	T	C	0.0636	0.011	0.3159	0.3177	FALSE	FALSE	FALSE	ebi-a-GCST005647	9	115519904	0.0145	80610	0.4487	Amyotrophic lateral sclerosis || id:ebi-a-GCST005647	Amyotrophic lateral sclerosis	Amyotrophic lateral sclerosis || ||	TRUE	igd	NA	NA	NA	NA	NA	NA	NA	90274766	176	0.0127	5.5e-07	14718	90274766	TRUE	reported	7TARFz	90274766	2	TRUE	NA	NA	0.00170129	14718	7.14e-06	80610	TRUE
234	rs35833676	T	C	T	C	0.0804	-0.0141	0.1452	0.156	FALSE	FALSE	FALSE	ebi-a-GCST005647	21	32961256	0.0189	80610	0.455	Amyotrophic lateral sclerosis || id:ebi-a-GCST005647	Amyotrophic lateral sclerosis	Amyotrophic lateral sclerosis || ||	TRUE	igd	NA	NA	NA	NA	NA	NA	NA	90274766	205	0.0166	1.28e-06	14732	90274766	TRUE	reported	7TARFz	90274766	2	TRUE	NA	NA	0.00159002	14732	6.9e-06	80610	TRUE
235	rs41302923	A	G	A	G	0.1939	0.0586	0.9774	0.9767	FALSE	FALSE	FALSE	ebi-a-GCST005647	10	127693479	0.0498	80610	0.2399	Amyotrophic lateral sclerosis || id:ebi-a-GCST005647	Amyotrophic lateral sclerosis	Amyotrophic lateral sclerosis || ||	TRUE	igd	NA	NA	NA	NA	NA	NA	NA	90274766	180	0.0414	2.82e-06	14726	90274766	TRUE	reported	7TARFz	90274766	2	TRUE	NA	NA	0.00148759	14726	1.72e-05	80610	TRUE
236	rs4981022	A	G	A	G	0.0635	-0.0184	0.6933	0.6861	FALSE	FALSE	FALSE	ebi-a-GCST005647	12	104149874	0.0147	80610	0.2117	Amyotrophic lateral sclerosis || id:ebi-a-GCST005647	Amyotrophic lateral sclerosis	Amyotrophic lateral sclerosis || ||	TRUE	igd	NA	NA	NA	NA	NA	NA	NA	90274766	186	0.0128	7.02e-07	14721	90274766	TRUE	reported	7TARFz	90274766	2	TRUE	NA	NA	0.00166926	14721	1.94e-05	80610	TRUE
237	rs5769672	T	G	T	G	-0.1184	-0.0223	0.9406	0.9418	FALSE	FALSE	FALSE	ebi-a-GCST005647	22	49877754	0.0295	80610	0.4505	Amyotrophic lateral sclerosis || id:ebi-a-GCST005647	Amyotrophic lateral sclerosis	Amyotrophic lateral sclerosis || ||	TRUE	igd	NA	NA	NA	NA	NA	NA	NA	90274766	207	0.0257	4.09e-06	14732	90274766	TRUE	reported	7TARFz	90274766	2	TRUE	NA	NA	0.00143883	14732	7.09e-06	80610	TRUE
238	rs6420556	T	C	T	C	-0.0736	-0.0054	0.1755	0.166	FALSE	FALSE	FALSE	ebi-a-GCST005647	18	56487606	0.0187	80610	0.7751	Amyotrophic lateral sclerosis || id:ebi-a-GCST005647	Amyotrophic lateral sclerosis	Amyotrophic lateral sclerosis || ||	TRUE	igd	NA	NA	NA	NA	NA	NA	NA	90274766	202	0.0158	3.19e-06	14288	90274766	TRUE	reported	7TARFz	90274766	2	TRUE	NA	NA	0.0015166	14288	1.03e-06	80610	TRUE
239	rs73072893	A	G	A	G	0.2057	0.0163	0.9739	0.9728	FALSE	FALSE	FALSE	ebi-a-GCST005647	12	19657540	0.0446	80610	0.7141	Amyotrophic lateral sclerosis || id:ebi-a-GCST005647	Amyotrophic lateral sclerosis	Amyotrophic lateral sclerosis || ||	TRUE	igd	NA	NA	NA	NA	NA	NA	NA	90274766	184	0.0422	1.09e-06	13230	90274766	TRUE	reported	7TARFz	90274766	2	TRUE	NA	NA	0.00179296	13230	1.66e-06	80610	TRUE
240	rs742493	T	C	T	C	0.1459	-0.0027	0.883	0.8825	FALSE	FALSE	FALSE	ebi-a-GCST005647	6	40998167	0.0215	80610	0.8984	Amyotrophic lateral sclerosis || id:ebi-a-GCST005647	Amyotrophic lateral sclerosis	Amyotrophic lateral sclerosis || ||	TRUE	igd	NA	NA	NA	NA	NA	NA	NA	90274766	147	0.0185	3.11e-15	14735	90274766	TRUE	reported	7TARFz	90274766	2	TRUE	NA	NA	0.00420384	14735	1.96e-07	80610	TRUE
241	rs9274623	T	G	T	G	-0.076	-0.039	0.215	0.2207	FALSE	FALSE	FALSE	ebi-a-GCST005647	6	32635998	0.0217	80610	0.0723003	Amyotrophic lateral sclerosis || id:ebi-a-GCST005647	Amyotrophic lateral sclerosis	Amyotrophic lateral sclerosis || ||	TRUE	igd	NA	NA	NA	NA	NA	NA	NA	90274766	139	0.0148	2.82e-07	14288	90274766	TRUE	reported	7TARFz	90274766	2	TRUE	NA	NA	0.00184243	14288	4.01e-05	80610	TRUE
242	rs112046281	A	G	A	G	-0.6167	0.0831	0.0161	0.0181	FALSE	FALSE	FALSE	ebi-a-GCST005647	6	31769614	0.0532	80610	0.118	Amyotrophic lateral sclerosis || id:ebi-a-GCST005647	Amyotrophic lateral sclerosis	Amyotrophic lateral sclerosis || ||	TRUE	igd	NA	NA	NA	NA	NA	NA	NA	90274840	7242	0.0536	1.24e-30	11792	90274840	TRUE	reported	DRSw98	90274840	2	TRUE	NA	NA	0.0111034	11792	3.03e-05	80610	TRUE
243	rs112317147	T	C	T	C	-0.1441	0.0335	0.0534	0.0514	FALSE	FALSE	FALSE	ebi-a-GCST005647	2	119783156	0.0336	80610	0.3178	Amyotrophic lateral sclerosis || id:ebi-a-GCST005647	Amyotrophic lateral sclerosis	Amyotrophic lateral sclerosis || ||	TRUE	igd	NA	NA	NA	NA	NA	NA	NA	90274840	15	0.0309	3.11e-06	11344	90274840	TRUE	reported	DRSw98	90274840	2	TRUE	NA	NA	0.00191377	11344	1.23e-05	80610	TRUE
244	rs113244922	T	C	T	C	0.2324	0.0248	0.0237	0.0228	FALSE	FALSE	FALSE	ebi-a-GCST005647	4	35497008	0.0519	80610	0.632799	Amyotrophic lateral sclerosis || id:ebi-a-GCST005647	Amyotrophic lateral sclerosis	Amyotrophic lateral sclerosis || ||	TRUE	igd	NA	NA	NA	NA	NA	NA	NA	90274840	40	0.0499	3.2e-06	10470	90274840	TRUE	reported	DRSw98	90274840	2	TRUE	NA	NA	0.0020678	10470	2.83e-06	80610	TRUE
245	rs114250919	T	C	T	C	0.2469	-0.0777	0.9743	0.9782	FALSE	FALSE	FALSE	ebi-a-GCST005647	5	21093728	0.0616	80610	0.2072	Amyotrophic lateral sclerosis || id:ebi-a-GCST005647	Amyotrophic lateral sclerosis	Amyotrophic lateral sclerosis || ||	TRUE	igd	NA	NA	NA	NA	NA	NA	NA	90274840	41	0.049	4.69e-07	11305	90274840	TRUE	reported	DRSw98	90274840	2	TRUE	NA	NA	0.00224121	11305	1.97e-05	80610	TRUE
246	rs116519179	A	G	A	G	-0.2639	0.0095	0.0214	0.0192	FALSE	FALSE	FALSE	ebi-a-GCST005647	6	32159742	0.0562	80610	0.8653	Amyotrophic lateral sclerosis || id:ebi-a-GCST005647	Amyotrophic lateral sclerosis	Amyotrophic lateral sclerosis || ||	TRUE	igd	NA	NA	NA	NA	NA	NA	NA	90274840	7606	0.0534	7.73e-07	11344	90274840	TRUE	reported	DRSw98	90274840	2	TRUE	NA	NA	0.00214868	11344	3.54e-07	80610	TRUE
247	rs12214465	T	C	T	C	-0.1038	-0.0361	0.1133	0.0983	FALSE	FALSE	FALSE	ebi-a-GCST005647	6	27848251	0.0269	80610	0.1802	Amyotrophic lateral sclerosis || id:ebi-a-GCST005647	Amyotrophic lateral sclerosis	Amyotrophic lateral sclerosis || ||	TRUE	igd	NA	NA	NA	NA	NA	NA	NA	90274840	56	0.0219	2.14e-06	11776	90274840	TRUE	reported	DRSw98	90274840	2	TRUE	NA	NA	0.00190438	11776	2.23e-05	80610	TRUE
248	rs12743015	C	G	C	G	-0.1918	0.0502	0.029	0.0301	FALSE	TRUE	FALSE	ebi-a-GCST005647	1	110256931	0.0425	80610	0.2381	Amyotrophic lateral sclerosis || id:ebi-a-GCST005647	Amyotrophic lateral sclerosis	Amyotrophic lateral sclerosis || ||	TRUE	igd	NA	NA	NA	NA	NA	NA	NA	90274840	11	0.0403	1.94e-06	11784	90274840	TRUE	reported	DRSw98	90274840	2	TRUE	NA	NA	0.00191882	11784	1.73e-05	80610	TRUE
249	rs12883833	A	G	A	G	-0.1252	0.0337	0.0934	0.0852	FALSE	FALSE	FALSE	ebi-a-GCST005647	14	34880659	0.0379	80610	0.3739	Amyotrophic lateral sclerosis || id:ebi-a-GCST005647	Amyotrophic lateral sclerosis	Amyotrophic lateral sclerosis || ||	TRUE	igd	NA	NA	NA	NA	NA	NA	NA	90274840	9668	0.0259	1.34e-06	9259	90274840	TRUE	reported	DRSw98	90274840	2	TRUE	NA	NA	0.00251793	9259	9.81e-06	80610	TRUE
250	rs138471526	T	C	T	C	-0.3418	0.1739	0.0137	0.0105	FALSE	FALSE	FALSE	ebi-a-GCST005647	11	72666063	0.1523	80610	0.2536	Amyotrophic lateral sclerosis || id:ebi-a-GCST005647	Amyotrophic lateral sclerosis	Amyotrophic lateral sclerosis || ||	TRUE	igd	NA	NA	NA	NA	NA	NA	NA	90274840	9359	0.0735	3.31e-06	9983	90274840	TRUE	reported	DRSw98	90274840	2	TRUE	NA	NA	0.002162	9983	1.62e-05	80610	TRUE
251	rs139511528	A	G	A	G	-0.2485	-0.0531	0.0294	0.0255	FALSE	FALSE	FALSE	ebi-a-GCST005647	12	6429443	0.0569	80610	0.3505	Amyotrophic lateral sclerosis || id:ebi-a-GCST005647	Amyotrophic lateral sclerosis	Amyotrophic lateral sclerosis || ||	TRUE	igd	NA	NA	NA	NA	NA	NA	NA	90274840	9360	0.0521	1.85e-06	10280	90274840	TRUE	reported	DRSw98	90274840	2	TRUE	NA	NA	0.00220856	10280	1.08e-05	80610	TRUE
252	rs143019966	T	C	T	C	0.2122	-0.0051	0.9751	0.9789	FALSE	FALSE	FALSE	ebi-a-GCST005647	13	47656376	0.0508	80610	0.9208	Amyotrophic lateral sclerosis || id:ebi-a-GCST005647	Amyotrophic lateral sclerosis	Amyotrophic lateral sclerosis || ||	TRUE	igd	NA	NA	NA	NA	NA	NA	NA	90274840	9666	0.0451	2.54e-06	10913	90274840	TRUE	reported	DRSw98	90274840	2	TRUE	NA	NA	0.00202485	10913	1.25e-07	80610	TRUE
253	rs147423408	A	G	A	G	0.1732	0.0384	0.0415	0.0406	FALSE	FALSE	FALSE	ebi-a-GCST005647	12	52132524	0.0368	80610	0.297	Amyotrophic lateral sclerosis || id:ebi-a-GCST005647	Amyotrophic lateral sclerosis	Amyotrophic lateral sclerosis || ||	TRUE	igd	NA	NA	NA	NA	NA	NA	NA	90274840	9397	0.035	7.48e-07	11344	90274840	TRUE	reported	DRSw98	90274840	2	TRUE	NA	NA	0.00215444	11344	1.35e-05	80610	TRUE
254	rs148844907	A	T	A	T	-1	0.1543	0.013	0.0103	FALSE	TRUE	FALSE	ebi-a-GCST005647	6	31628397	0.1216	80610	0.2043	Amyotrophic lateral sclerosis || id:ebi-a-GCST005647	Amyotrophic lateral sclerosis	Amyotrophic lateral sclerosis || ||	TRUE	igd	NA	NA	NA	NA	NA	NA	NA	90274840	7175	0.0867	8.89e-31	7423	90274840	TRUE	reported	DRSw98	90274840	2	TRUE	NA	NA	0.017611	7423	2e-05	80610	TRUE
255	rs151218088	T	C	T	C	-0.6677	-0.0493	0.014	0.0126	FALSE	FALSE	FALSE	ebi-a-GCST005647	6	30540762	0.0826	80610	0.5505	Amyotrophic lateral sclerosis || id:ebi-a-GCST005647	Amyotrophic lateral sclerosis	Amyotrophic lateral sclerosis || ||	TRUE	igd	NA	NA	NA	NA	NA	NA	NA	90274840	1330	0.0648	6.76e-25	10857	90274840	TRUE	reported	DRSw98	90274840	2	TRUE	NA	NA	0.00968625	10857	4.42e-06	80610	TRUE
256	rs185420195	T	C	T	C	0.2473	-0.0469	0.0255	0.0241	FALSE	FALSE	FALSE	ebi-a-GCST005647	6	30989631	0.0475	80610	0.3239	Amyotrophic lateral sclerosis || id:ebi-a-GCST005647	Amyotrophic lateral sclerosis	Amyotrophic lateral sclerosis || ||	TRUE	igd	NA	NA	NA	NA	NA	NA	NA	90274840	1671	0.046	7.61e-08	11344	90274840	TRUE	reported	DRSw98	90274840	2	TRUE	NA	NA	0.00254178	11344	1.21e-05	80610	TRUE
257	rs2074475	T	C	T	C	0.2308	-0.0396	0.9618	0.9783	FALSE	FALSE	FALSE	ebi-a-GCST005647	6	30137890	0.0495	80610	0.4231	Amyotrophic lateral sclerosis || id:ebi-a-GCST005647	Amyotrophic lateral sclerosis	Amyotrophic lateral sclerosis || ||	TRUE	igd	NA	NA	NA	NA	NA	NA	NA	90274840	1086	0.0421	4.2e-08	11792	90274840	TRUE	reported	DRSw98	90274840	2	TRUE	NA	NA	0.00254266	11792	7.94e-06	80610	TRUE
258	rs2364485	A	C	A	C	0.1759	-0.022	0.1645	0.1696	FALSE	FALSE	FALSE	ebi-a-GCST005647	12	6514963	0.0221	80610	0.32	Amyotrophic lateral sclerosis || id:ebi-a-GCST005647	Amyotrophic lateral sclerosis	Amyotrophic lateral sclerosis || ||	TRUE	igd	NA	NA	NA	NA	NA	NA	NA	90274840	9388	0.0189	1.32e-20	11344	90274840	TRUE	reported	DRSw98	90274840	2	TRUE	NA	NA	0.00757904	11344	1.23e-05	80610	TRUE
259	rs2523887	A	G	A	G	0.2057	0.0083	0.7362	0.71	FALSE	FALSE	FALSE	ebi-a-GCST005647	6	31040725	0.0151	80610	0.5841	Amyotrophic lateral sclerosis || id:ebi-a-GCST005647	Amyotrophic lateral sclerosis	Amyotrophic lateral sclerosis || ||	TRUE	igd	NA	NA	NA	NA	NA	NA	NA	90274840	1978	0.0148	6.45e-44	11792	90274840	TRUE	reported	DRSw98	90274840	2	TRUE	NA	NA	0.0161203	11792	3.75e-06	80610	TRUE
260	rs28366157	A	G	A	G	-0.217	0.0048	0.9465	0.946	FALSE	FALSE	FALSE	ebi-a-GCST005647	6	31672242	0.0308	80610	0.8749	Amyotrophic lateral sclerosis || id:ebi-a-GCST005647	Amyotrophic lateral sclerosis	Amyotrophic lateral sclerosis || ||	TRUE	igd	NA	NA	NA	NA	NA	NA	NA	90274840	7194	0.0313	4.12e-12	10918	90274840	TRUE	reported	DRSw98	90274840	2	TRUE	NA	NA	0.00438388	10918	3.01e-07	80610	TRUE
261	rs28700215	T	C	T	C	-0.0626	-0.0214	0.5824	0.5857	FALSE	FALSE	FALSE	ebi-a-GCST005647	15	100064767	0.0141	80610	0.1282	Amyotrophic lateral sclerosis || id:ebi-a-GCST005647	Amyotrophic lateral sclerosis	Amyotrophic lateral sclerosis || ||	TRUE	igd	NA	NA	NA	NA	NA	NA	NA	90274840	9672	0.0136	4.17e-06	11344	90274840	TRUE	reported	DRSw98	90274840	2	TRUE	NA	NA	0.00186454	11344	2.86e-05	80610	TRUE
262	rs2894233	A	G	A	G	-0.3651	-0.067	0.9705	0.9732	FALSE	FALSE	FALSE	ebi-a-GCST005647	6	32011678	0.0504	80610	0.1837	Amyotrophic lateral sclerosis || id:ebi-a-GCST005647	Amyotrophic lateral sclerosis	Amyotrophic lateral sclerosis || ||	TRUE	igd	NA	NA	NA	NA	NA	NA	NA	90274840	7500	0.0539	1.26e-11	8974	90274840	TRUE	reported	DRSw98	90274840	2	TRUE	NA	NA	0.00508794	8974	2.19e-05	80610	TRUE
263	rs2904602	A	G	A	G	-0.625	0.0201	0.1165	0.1122	FALSE	FALSE	FALSE	ebi-a-GCST005647	6	31451847	0.0216	80610	0.3521	Amyotrophic lateral sclerosis || id:ebi-a-GCST005647	Amyotrophic lateral sclerosis	Amyotrophic lateral sclerosis || ||	TRUE	igd	NA	NA	NA	NA	NA	NA	NA	90274840	6527	0.0196	1e-200	11791	90274840	TRUE	reported	DRSw98	90274840	2	TRUE	NA	NA	0.0794036	11791	1.07e-05	80610	TRUE
264	rs3132518	C	G	C	G	0.1071	0.0234	0.4015	0.4036	FALSE	TRUE	FALSE	ebi-a-GCST005647	6	31140169	0.0139	80610	0.0914303	Amyotrophic lateral sclerosis || id:ebi-a-GCST005647	Amyotrophic lateral sclerosis	Amyotrophic lateral sclerosis || ||	TRUE	igd	NA	NA	NA	NA	NA	NA	NA	90274840	2595	0.0133	8.1e-16	11791	90274840	TRUE	reported	DRSw98	90274840	2	TRUE	NA	NA	0.00547037	11791	3.52e-05	80610	TRUE
265	rs35986022	A	G	A	G	0.1101	-0.0006	0.102	0.0947	FALSE	FALSE	FALSE	ebi-a-GCST005647	12	113315391	0.0272	80610	0.9829	Amyotrophic lateral sclerosis || id:ebi-a-GCST005647	Amyotrophic lateral sclerosis	Amyotrophic lateral sclerosis || ||	TRUE	igd	NA	NA	NA	NA	NA	NA	NA	90274840	9662	0.0235	2.8e-06	11344	90274840	TRUE	reported	DRSw98	90274840	2	TRUE	NA	NA	0.00193157	11344	6.04e-09	80610	TRUE
266	rs376354727	A	G	A	G	-0.3237	0.079	0.0217	0.0102	FALSE	FALSE	FALSE	ebi-a-GCST005647	6	31314414	0.1077	80610	0.4632	Amyotrophic lateral sclerosis || id:ebi-a-GCST005647	Amyotrophic lateral sclerosis	Amyotrophic lateral sclerosis || ||	TRUE	igd	TRUE	rs376354727	rs73728867	A	G	C	T	90274840	4713	0.0647	5.64e-07	8223	90274840	TRUE	reported	DRSw98	90274840	2	TRUE	NA	NA	0.00303551	8223	6.67e-06	80610	TRUE
267	rs3789087	T	C	T	C	-0.0819	0.0585	0.1582	0.158	FALSE	FALSE	FALSE	ebi-a-GCST005647	2	111791653	0.0185	80610	0.001588	Amyotrophic lateral sclerosis || id:ebi-a-GCST005647	Amyotrophic lateral sclerosis	Amyotrophic lateral sclerosis || ||	TRUE	igd	NA	NA	NA	NA	NA	NA	NA	90274840	14	0.0179	4.75e-06	11788	90274840	TRUE	reported	DRSw98	90274840	2	TRUE	NA	NA	0.00177307	11788	0.000124033	80610	TRUE
268	rs55914821	A	G	A	G	0.0748	-0.0003	0.7583	0.779	FALSE	FALSE	FALSE	ebi-a-GCST005647	17	65264208	0.0173	80610	0.9878	Amyotrophic lateral sclerosis || id:ebi-a-GCST005647	Amyotrophic lateral sclerosis	Amyotrophic lateral sclerosis || ||	TRUE	igd	NA	NA	NA	NA	NA	NA	NA	90274840	9680	0.0159	2.55e-06	11344	90274840	TRUE	reported	DRSw98	90274840	2	TRUE	NA	NA	0.00194748	11344	3.73e-09	80610	TRUE
269	rs62408379	T	C	T	C	-0.1523	0.014	0.0771	0.0836	FALSE	FALSE	FALSE	ebi-a-GCST005647	6	28722076	0.025	80610	0.5755	Amyotrophic lateral sclerosis || id:ebi-a-GCST005647	Amyotrophic lateral sclerosis	Amyotrophic lateral sclerosis || ||	TRUE	igd	NA	NA	NA	NA	NA	NA	NA	90274840	105	0.0248	8.19e-10	11774	90274840	TRUE	reported	DRSw98	90274840	2	TRUE	NA	NA	0.00319343	11774	3.89e-06	80610	TRUE
270	rs7310615	C	G	C	G	0.1356	-0.0447	0.4758	0.4866	FALSE	TRUE	TRUE	ebi-a-GCST005647	12	111865049	0.0138	80610	0.00121599	Amyotrophic lateral sclerosis || id:ebi-a-GCST005647	Amyotrophic lateral sclerosis	Amyotrophic lateral sclerosis || ||	TRUE	igd	NA	NA	NA	NA	NA	NA	NA	90274840	9492	0.0134	4.53e-24	11344	90274840	TRUE	reported	DRSw98	90274840	2	FALSE	NA	NA	0.00894781	11344	0.000130143	80610	TRUE
271	rs73390248	T	C	T	C	-0.2269	0.0484	0.1027	0.1045	FALSE	FALSE	FALSE	ebi-a-GCST005647	6	31329834	0.0224	80610	0.03046	Amyotrophic lateral sclerosis || id:ebi-a-GCST005647	Amyotrophic lateral sclerosis	Amyotrophic lateral sclerosis || ||	TRUE	igd	NA	NA	NA	NA	NA	NA	NA	90274840	5325	0.0223	2.57e-24	11792	90274840	TRUE	reported	DRSw98	90274840	2	TRUE	NA	NA	0.0087046	11792	5.79e-05	80610	TRUE
272	rs74363807	T	C	T	C	0.2496	-0.0614	0.0218	0.0169	FALSE	FALSE	FALSE	ebi-a-GCST005647	7	46566236	0.0666	80610	0.3565	Amyotrophic lateral sclerosis || id:ebi-a-GCST005647	Amyotrophic lateral sclerosis	Amyotrophic lateral sclerosis || ||	TRUE	igd	NA	NA	NA	NA	NA	NA	NA	90274840	9353	0.0532	2.71e-06	11344	90274840	TRUE	reported	DRSw98	90274840	2	TRUE	NA	NA	0.00193702	11344	1.05e-05	80610	TRUE
273	rs75508961	C	G	C	G	0.1731	0.0072	0.0504	0.0506	FALSE	TRUE	FALSE	ebi-a-GCST005647	2	215601711	0.0411	80610	0.8609	Amyotrophic lateral sclerosis || id:ebi-a-GCST005647	Amyotrophic lateral sclerosis	Amyotrophic lateral sclerosis || ||	TRUE	igd	NA	NA	NA	NA	NA	NA	NA	90274840	35	0.0362	1.74e-06	8297	90274840	TRUE	reported	DRSw98	90274840	2	TRUE	NA	NA	0.00274894	8297	3.81e-07	80610	TRUE
274	rs7583622	A	G	A	G	0.0748	0.0153	0.2098	0.2078	FALSE	FALSE	FALSE	ebi-a-GCST005647	2	53931190	0.017	80610	0.3665	Amyotrophic lateral sclerosis || id:ebi-a-GCST005647	Amyotrophic lateral sclerosis	Amyotrophic lateral sclerosis || ||	TRUE	igd	NA	NA	NA	NA	NA	NA	NA	90274840	13	0.0161	3.38e-06	11769	90274840	TRUE	reported	DRSw98	90274840	2	TRUE	NA	NA	0.00183101	11769	1e-05	80610	TRUE
275	rs76913603	A	G	A	G	-0.1741	-0.0071	0.967	0.9661	FALSE	FALSE	FALSE	ebi-a-GCST005647	5	167809091	0.0411	80610	0.8636	Amyotrophic lateral sclerosis || id:ebi-a-GCST005647	Amyotrophic lateral sclerosis	Amyotrophic lateral sclerosis || ||	TRUE	igd	NA	NA	NA	NA	NA	NA	NA	90274840	42	0.0379	4.36e-06	11782	90274840	TRUE	reported	DRSw98	90274840	2	TRUE	NA	NA	0.00178812	11782	3.7e-07	80610	TRUE
276	rs77897196	T	C	T	C	-0.1917	-0.0424	0.9711	0.9671	FALSE	FALSE	FALSE	ebi-a-GCST005647	1	63459761	0.0425	80610	0.3186	Amyotrophic lateral sclerosis || id:ebi-a-GCST005647	Amyotrophic lateral sclerosis	Amyotrophic lateral sclerosis || ||	TRUE	igd	NA	NA	NA	NA	NA	NA	NA	90274840	2	0.041	2.93e-06	11792	90274840	TRUE	reported	DRSw98	90274840	2	TRUE	NA	NA	0.00185079	11792	1.23e-05	80610	TRUE
277	rs78477739	T	C	T	C	0.1462	0.0075	0.7457	0.8435	FALSE	FALSE	FALSE	ebi-a-GCST005647	6	32457465	0.0293	80610	0.798	Amyotrophic lateral sclerosis || id:ebi-a-GCST005647	Amyotrophic lateral sclerosis	Amyotrophic lateral sclerosis || ||	TRUE	igd	TRUE	rs78477739	rs148333241	C	T	C	T	90274840	8025	0.0285	2.9e-07	6057	90274840	TRUE	reported	DRSw98	90274840	2	TRUE	NA	NA	0.0043272	6057	8.13e-07	80610	TRUE
278	rs10024178	T	C	T	C	-0.0925	0.0213	0.905	0.9034	FALSE	FALSE	FALSE	ebi-a-GCST005647	4	5801734	0.0241	80610	0.376	Amyotrophic lateral sclerosis || id:ebi-a-GCST005647	Amyotrophic lateral sclerosis	Amyotrophic lateral sclerosis || ||	TRUE	igd	NA	NA	NA	NA	NA	NA	NA	90274759	13	0.0199	3.35e-06	14716	90274759	TRUE	reported	gj89tA	90274759	2	TRUE	NA	NA	0.00146625	14716	9.69e-06	80610	TRUE
279	rs111478357	T	C	T	C	0.2044	0.0881	0.0243	0.0253	FALSE	FALSE	FALSE	ebi-a-GCST005647	2	144650434	0.0495	80610	0.0753998	Amyotrophic lateral sclerosis || id:ebi-a-GCST005647	Amyotrophic lateral sclerosis	Amyotrophic lateral sclerosis || ||	TRUE	igd	NA	NA	NA	NA	NA	NA	NA	90274759	9	0.044	3.39e-06	13801	90274759	TRUE	reported	gj89tA	90274759	2	TRUE	NA	NA	0.00156146	13801	3.93e-05	80610	TRUE
280	rs112665079	T	C	T	C	0.8932	0.0687	0.051	0.0524	FALSE	FALSE	FALSE	ebi-a-GCST005647	20	43120683	0.0328	80610	0.0361302	Amyotrophic lateral sclerosis || id:ebi-a-GCST005647	Amyotrophic lateral sclerosis	Amyotrophic lateral sclerosis || ||	TRUE	igd	NA	NA	NA	NA	NA	NA	NA	90274759	187	0.026	1e-200	14720	90274759	TRUE	reported	gj89tA	90274759	2	TRUE	NA	NA	0.074234	14720	5.44e-05	80610	TRUE
281	rs115657851	A	G	A	G	0.139	-0.0032	0.0462	0.0387	FALSE	FALSE	FALSE	ebi-a-GCST005647	1	57353848	0.0362	80610	0.9296	Amyotrophic lateral sclerosis || id:ebi-a-GCST005647	Amyotrophic lateral sclerosis	Amyotrophic lateral sclerosis || ||	TRUE	igd	NA	NA	NA	NA	NA	NA	NA	90274759	5	0.0293	2.1e-06	14715	90274759	TRUE	reported	gj89tA	90274759	2	TRUE	NA	NA	0.00152732	14715	9.69e-08	80610	TRUE
282	rs117645472	A	T	A	T	0.3494	-0.0247	0.0125	0.0177	FALSE	TRUE	FALSE	ebi-a-GCST005647	18	917376	0.1344	80610	0.854	Amyotrophic lateral sclerosis || id:ebi-a-GCST005647	Amyotrophic lateral sclerosis	Amyotrophic lateral sclerosis || ||	TRUE	igd	NA	NA	NA	NA	NA	NA	NA	90274759	39	0.0754	3.59e-06	11095	90274759	TRUE	reported	gj89tA	90274759	2	TRUE	NA	NA	0.00193203	11095	4.19e-07	80610	TRUE
283	rs138960575	A	G	A	G	0.2878	-0.101	0.9797	0.9815	FALSE	FALSE	FALSE	ebi-a-GCST005647	20	43240490	0.0646	80610	0.1179	Amyotrophic lateral sclerosis || id:ebi-a-GCST005647	Amyotrophic lateral sclerosis	Amyotrophic lateral sclerosis || ||	TRUE	igd	NA	NA	NA	NA	NA	NA	NA	90274759	335	0.0507	1.37e-08	14288	90274759	TRUE	reported	gj89tA	90274759	2	TRUE	NA	NA	0.00225049	14288	3.03e-05	80610	TRUE
284	rs140060277	A	AT	A	AT	0.1547	0.0607	0.8827	0.8715	FALSE	FALSE	FALSE	ebi-a-GCST005647	20	43168393	0.0299	80610	0.0423497	Amyotrophic lateral sclerosis || id:ebi-a-GCST005647	Amyotrophic lateral sclerosis	Amyotrophic lateral sclerosis || ||	TRUE	igd	NA	NA	NA	NA	NA	NA	NA	90274759	259	0.0243	1.94e-10	10407	90274759	TRUE	reported	gj89tA	90274759	2	TRUE	NA	NA	0.00388005	10407	5.11e-05	80610	TRUE
285	rs147706532	A	G	A	G	-0.1816	0.0231	0.0369	0.036	FALSE	FALSE	FALSE	ebi-a-GCST005647	20	43086107	0.0453	80610	0.6111	Amyotrophic lateral sclerosis || id:ebi-a-GCST005647	Amyotrophic lateral sclerosis	Amyotrophic lateral sclerosis || ||	TRUE	igd	NA	NA	NA	NA	NA	NA	NA	90274759	148	0.034	9.23e-08	14714	90274759	TRUE	reported	gj89tA	90274759	2	TRUE	NA	NA	0.00193536	14714	3.23e-06	80610	TRUE
286	rs1608554	A	G	A	G	0.0598	0.004	0.656	0.6364	FALSE	FALSE	FALSE	ebi-a-GCST005647	7	22807634	0.0142	80610	0.7801	Amyotrophic lateral sclerosis || id:ebi-a-GCST005647	Amyotrophic lateral sclerosis	Amyotrophic lateral sclerosis || ||	TRUE	igd	NA	NA	NA	NA	NA	NA	NA	90274759	25	0.0122	9.5e-07	14733	90274759	TRUE	reported	gj89tA	90274759	2	TRUE	NA	NA	0.00162833	14733	9.84e-07	80610	TRUE
287	rs189104742	A	T	A	T	0.2754	-0.0552	0.9857	0.9886	FALSE	TRUE	FALSE	ebi-a-GCST005647	4	75665562	0.1569	80610	0.7249	Amyotrophic lateral sclerosis || id:ebi-a-GCST005647	Amyotrophic lateral sclerosis	Amyotrophic lateral sclerosis || ||	TRUE	igd	NA	NA	NA	NA	NA	NA	NA	90274759	16	0.0584	2.41e-06	14729	90274759	TRUE	reported	gj89tA	90274759	2	TRUE	NA	NA	0.00150776	14729	1.54e-06	80610	TRUE
288	rs2527856	T	C	T	C	0.0562	-0.007	0.5989	0.5979	FALSE	FALSE	FALSE	ebi-a-GCST005647	7	80678923	0.0144	80610	0.6281	Amyotrophic lateral sclerosis || id:ebi-a-GCST005647	Amyotrophic lateral sclerosis	Amyotrophic lateral sclerosis || ||	TRUE	igd	NA	NA	NA	NA	NA	NA	NA	90274759	27	0.0122	4.09e-06	14288	90274759	TRUE	reported	gj89tA	90274759	2	TRUE	NA	NA	0.00148319	14288	2.93e-06	80610	TRUE
289	rs2620728	C	G	C	G	-0.0551	-0.0468	0.5267	0.5234	FALSE	TRUE	TRUE	ebi-a-GCST005647	12	65118323	0.0144	80610	0.00118899	Amyotrophic lateral sclerosis || id:ebi-a-GCST005647	Amyotrophic lateral sclerosis	Amyotrophic lateral sclerosis || ||	TRUE	igd	NA	NA	NA	NA	NA	NA	NA	90274759	35	0.0119	3.65e-06	14288	90274759	TRUE	reported	gj89tA	90274759	2	FALSE	NA	NA	0.00149847	14288	0.000131018	80610	TRUE
290	rs36216718	T	C	T	C	-0.1817	-0.0738	0.0552	0.0528	FALSE	FALSE	FALSE	ebi-a-GCST005647	20	43280349	0.0567	80610	0.1928	Amyotrophic lateral sclerosis || id:ebi-a-GCST005647	Amyotrophic lateral sclerosis	Amyotrophic lateral sclerosis || ||	TRUE	igd	NA	NA	NA	NA	NA	NA	NA	90274759	405	0.027	1.7e-11	14066	90274759	TRUE	reported	gj89tA	90274759	2	TRUE	NA	NA	0.0032098	14066	2.1e-05	80610	TRUE
291	rs6017383	T	C	T	C	-0.1776	-0.0124	0.7625	0.76	FALSE	FALSE	FALSE	ebi-a-GCST005647	20	43298501	0.0178	80610	0.4887	Amyotrophic lateral sclerosis || id:ebi-a-GCST005647	Amyotrophic lateral sclerosis	Amyotrophic lateral sclerosis || ||	TRUE	igd	NA	NA	NA	NA	NA	NA	NA	90274759	445	0.0141	2.23e-36	14715	90274759	TRUE	reported	gj89tA	90274759	2	TRUE	NA	NA	0.0106681	14715	6.02e-06	80610	TRUE
292	rs6130598	A	G	A	G	0.0771	0.0236	0.2279	0.2275	FALSE	FALSE	FALSE	ebi-a-GCST005647	20	42994389	0.0167	80610	0.1593	Amyotrophic lateral sclerosis || id:ebi-a-GCST005647	Amyotrophic lateral sclerosis	Amyotrophic lateral sclerosis || ||	TRUE	igd	NA	NA	NA	NA	NA	NA	NA	90274759	100	0.0142	5.65e-08	14288	90274759	TRUE	reported	gj89tA	90274759	2	TRUE	NA	NA	0.00205933	14288	2.48e-05	80610	TRUE
293	rs62319741	T	C	T	C	0.1281	-0.0056	0.9456	0.9496	FALSE	FALSE	FALSE	ebi-a-GCST005647	4	124571895	0.0331	80610	0.866	Amyotrophic lateral sclerosis || id:ebi-a-GCST005647	Amyotrophic lateral sclerosis	Amyotrophic lateral sclerosis || ||	TRUE	igd	NA	NA	NA	NA	NA	NA	NA	90274759	18	0.0258	6.87e-07	14733	90274759	TRUE	reported	gj89tA	90274759	2	TRUE	NA	NA	0.00167071	14733	3.55e-07	80610	TRUE
294	rs7292320	A	G	A	G	-0.0599	-0.022	0.2529	0.2537	FALSE	FALSE	FALSE	ebi-a-GCST005647	22	37921425	0.016	80610	0.1689	Amyotrophic lateral sclerosis || id:ebi-a-GCST005647	Amyotrophic lateral sclerosis	Amyotrophic lateral sclerosis || ||	TRUE	igd	NA	NA	NA	NA	NA	NA	NA	90274759	521	0.0131	4.82e-06	14729	90274759	TRUE	reported	gj89tA	90274759	2	TRUE	NA	NA	0.00141769	14729	2.35e-05	80610	TRUE
295	rs80212763	T	C	T	C	0.9687	-0.0603	0.0189	0.0168	FALSE	FALSE	FALSE	ebi-a-GCST005647	20	43223930	0.0601	80610	0.3152	Amyotrophic lateral sclerosis || id:ebi-a-GCST005647	Amyotrophic lateral sclerosis	Amyotrophic lateral sclerosis || ||	TRUE	igd	NA	NA	NA	NA	NA	NA	NA	90274759	313	0.0448	1.1e-103	14249	90274759	TRUE	reported	gj89tA	90274759	2	TRUE	NA	NA	0.0317743	14249	1.25e-05	80610	TRUE
296	rs10988407	A	G	A	G	0.0777	-0.0035	0.2002	0.2028	FALSE	FALSE	FALSE	ebi-a-GCST005647	9	132281601	0.017	80610	0.8383	Amyotrophic lateral sclerosis || id:ebi-a-GCST005647	Amyotrophic lateral sclerosis	Amyotrophic lateral sclerosis || ||	TRUE	igd	NA	NA	NA	NA	NA	NA	NA	90274814	54	0.0167	3.28e-06	11791	90274814	TRUE	reported	LFBQAa	90274814	2	TRUE	NA	NA	0.00183289	11791	5.26e-07	80610	TRUE
297	rs114829303	T	C	T	C	0.1661	-0.0252	0.0436	0.0453	FALSE	FALSE	FALSE	ebi-a-GCST005647	1	37473314	0.0404	80610	0.5331	Amyotrophic lateral sclerosis || id:ebi-a-GCST005647	Amyotrophic lateral sclerosis	Amyotrophic lateral sclerosis || ||	TRUE	igd	NA	NA	NA	NA	NA	NA	NA	90274814	1	0.0361	4.2e-06	11344	90274814	TRUE	reported	LFBQAa	90274814	2	TRUE	NA	NA	0.00186305	11344	4.83e-06	80610	TRUE
298	rs12592185	T	C	T	C	0.0838	-0.0188	0.8068	0.807	FALSE	FALSE	FALSE	ebi-a-GCST005647	15	70546132	0.0176	80610	0.2855	Amyotrophic lateral sclerosis || id:ebi-a-GCST005647	Amyotrophic lateral sclerosis	Amyotrophic lateral sclerosis || ||	TRUE	igd	NA	NA	NA	NA	NA	NA	NA	90274814	60	0.0173	1.27e-06	11344	90274814	TRUE	reported	LFBQAa	90274814	2	TRUE	NA	NA	0.00206447	11344	1.42e-05	80610	TRUE
299	rs12864018	A	C	A	C	-0.2292	0.1101	0.0477	0.0422	FALSE	FALSE	FALSE	ebi-a-GCST005647	13	78234635	0.0906	80610	0.2245	Amyotrophic lateral sclerosis || id:ebi-a-GCST005647	Amyotrophic lateral sclerosis	Amyotrophic lateral sclerosis || ||	TRUE	igd	NA	NA	NA	NA	NA	NA	NA	90274814	58	0.0499	4.37e-06	7943	90274814	TRUE	reported	LFBQAa	90274814	2	TRUE	NA	NA	0.00264972	7943	1.83e-05	80610	TRUE
300	rs132210	T	C	T	C	-0.0686	0.0124	0.3408	0.3297	FALSE	FALSE	FALSE	ebi-a-GCST005647	22	48143913	0.0145	80610	0.3941	Amyotrophic lateral sclerosis || id:ebi-a-GCST005647	Amyotrophic lateral sclerosis	Amyotrophic lateral sclerosis || ||	TRUE	igd	NA	NA	NA	NA	NA	NA	NA	90274814	65	0.0141	1.14e-06	11344	90274814	TRUE	reported	LFBQAa	90274814	2	TRUE	NA	NA	0.00208264	11344	9.07e-06	80610	TRUE
301	rs17009223	A	G	A	G	-0.1169	-0.0321	0.0881	0.0957	FALSE	FALSE	FALSE	ebi-a-GCST005647	1	208050360	0.0234	80610	0.1701	Amyotrophic lateral sclerosis || id:ebi-a-GCST005647	Amyotrophic lateral sclerosis	Amyotrophic lateral sclerosis || ||	TRUE	igd	NA	NA	NA	NA	NA	NA	NA	90274814	6	0.0236	7.29e-07	11789	90274814	TRUE	reported	LFBQAa	90274814	2	TRUE	NA	NA	0.0020773	11789	2.33e-05	80610	TRUE
302	rs201464214	A	AT	A	AT	-0.2449	0.0415	0.9701	0.9727	FALSE	FALSE	FALSE	ebi-a-GCST005647	10	8132034	0.0497	80610	0.4034	Amyotrophic lateral sclerosis || id:ebi-a-GCST005647	Amyotrophic lateral sclerosis	Amyotrophic lateral sclerosis || ||	TRUE	igd	NA	NA	NA	NA	NA	NA	NA	90274814	56	0.048	3.36e-07	8377	90274814	TRUE	reported	LFBQAa	90274814	2	TRUE	NA	NA	0.00309858	8377	8.65e-06	80610	TRUE
303	rs34639000	A	G	A	G	0.0765	0.043	0.7289	0.7481	FALSE	FALSE	FALSE	ebi-a-GCST005647	5	95530542	0.0159	80610	0.00685993	Amyotrophic lateral sclerosis || id:ebi-a-GCST005647	Amyotrophic lateral sclerosis	Amyotrophic lateral sclerosis || ||	TRUE	igd	NA	NA	NA	NA	NA	NA	NA	90274814	24	0.0147	1.95e-07	11773	90274814	TRUE	reported	LFBQAa	90274814	2	TRUE	NA	NA	0.0022955	11773	9.07e-05	80610	TRUE
304	rs4277106	A	G	A	G	-0.2747	-0.0455	0.9858	0.983	FALSE	FALSE	FALSE	ebi-a-GCST005647	11	10380223	0.0556	80610	0.413	Amyotrophic lateral sclerosis || id:ebi-a-GCST005647	Amyotrophic lateral sclerosis	Amyotrophic lateral sclerosis || ||	TRUE	igd	NA	NA	NA	NA	NA	NA	NA	90274814	57	0.0592	3.48e-06	11790	90274814	TRUE	reported	LFBQAa	90274814	2	TRUE	NA	NA	0.00182323	11790	8.31e-06	80610	TRUE
305	rs62069649	A	G	A	G	0.2206	0.0446	0.0267	0.0245	FALSE	FALSE	FALSE	ebi-a-GCST005647	17	59402478	0.0686	80610	0.5158	Amyotrophic lateral sclerosis || id:ebi-a-GCST005647	Amyotrophic lateral sclerosis	Amyotrophic lateral sclerosis || ||	TRUE	igd	NA	NA	NA	NA	NA	NA	NA	90274814	63	0.0482	4.72e-06	10431	90274814	TRUE	reported	LFBQAa	90274814	2	TRUE	NA	NA	0.00200448	10431	5.24e-06	80610	TRUE
306	rs7142197	A	G	A	G	-0.0924	0.0036	0.1442	0.148	FALSE	FALSE	FALSE	ebi-a-GCST005647	14	93316119	0.0197	80610	0.8542	Amyotrophic lateral sclerosis || id:ebi-a-GCST005647	Amyotrophic lateral sclerosis	Amyotrophic lateral sclerosis || ||	TRUE	igd	NA	NA	NA	NA	NA	NA	NA	90274814	59	0.0188	8.88e-07	11773	90274814	TRUE	reported	LFBQAa	90274814	2	TRUE	NA	NA	0.00204798	11773	4.14e-07	80610	TRUE
307	rs7193141	C	G	C	G	0.2407	0.0063	0.0351	0.0422	FALSE	TRUE	FALSE	ebi-a-GCST005647	16	86933894	0.0605	80610	0.9171	Amyotrophic lateral sclerosis || id:ebi-a-GCST005647	Amyotrophic lateral sclerosis	Amyotrophic lateral sclerosis || ||	TRUE	igd	NA	NA	NA	NA	NA	NA	NA	90274814	62	0.0521	3.84e-06	9377	90274814	TRUE	reported	LFBQAa	90274814	2	TRUE	NA	NA	0.00227153	9377	1.35e-07	80610	TRUE
308	rs10142466	A	G	A	G	0.057	-0.0095	0.49	0.4928	FALSE	FALSE	FALSE	ebi-a-GCST005647	14	69271784	0.0136	80610	0.4833	Amyotrophic lateral sclerosis || id:ebi-a-GCST005647	Amyotrophic lateral sclerosis	Amyotrophic lateral sclerosis || ||	TRUE	igd	NA	NA	NA	NA	NA	NA	NA	90274830	623	0.0109	1.7e-07	14721	90274830	TRUE	reported	LifyBm	90274830	2	TRUE	NA	NA	0.00185444	14721	6.05e-06	80610	TRUE
309	rs112635299	T	G	T	G	0.2618	-0.0445	0.0205	0.0179	FALSE	FALSE	FALSE	ebi-a-GCST005647	14	94838142	0.0572	80610	0.4365	Amyotrophic lateral sclerosis || id:ebi-a-GCST005647	Amyotrophic lateral sclerosis	Amyotrophic lateral sclerosis || ||	TRUE	igd	NA	NA	NA	NA	NA	NA	NA	90274830	632	0.0433	1.48e-09	14733	90274830	TRUE	reported	LifyBm	90274830	2	TRUE	NA	NA	0.00247545	14733	7.51e-06	80610	TRUE
310	rs114165349	C	G	C	G	-0.1948	-0.0566	0.0337	0.0249	FALSE	TRUE	FALSE	ebi-a-GCST005647	1	27021913	0.0481	80610	0.2388	Amyotrophic lateral sclerosis || id:ebi-a-GCST005647	Amyotrophic lateral sclerosis	Amyotrophic lateral sclerosis || ||	TRUE	igd	NA	NA	NA	NA	NA	NA	NA	90274830	2	0.034	1.01e-08	14727	90274830	TRUE	reported	LifyBm	90274830	2	TRUE	NA	NA	0.00222432	14727	1.72e-05	80610	TRUE
311	rs1230164	C	G	C	G	-0.0671	-0.0023	0.7288	0.713	FALSE	TRUE	FALSE	ebi-a-GCST005647	4	99986023	0.0151	80610	0.8777	Amyotrophic lateral sclerosis || id:ebi-a-GCST005647	Amyotrophic lateral sclerosis	Amyotrophic lateral sclerosis || ||	TRUE	igd	NA	NA	NA	NA	NA	NA	NA	90274830	44	0.0129	1.98e-07	14285	90274830	TRUE	reported	LifyBm	90274830	2	TRUE	NA	NA	0.00189071	14285	2.88e-07	80610	TRUE
312	rs138408096	A	G	A	G	-0.2007	0.0186	0.0206	0.0193	FALSE	FALSE	FALSE	ebi-a-GCST005647	15	84250648	0.053	80610	0.725301	Amyotrophic lateral sclerosis || id:ebi-a-GCST005647	Amyotrophic lateral sclerosis	Amyotrophic lateral sclerosis || ||	TRUE	igd	NA	NA	NA	NA	NA	NA	NA	90274830	634	0.0423	2.09e-06	14721	90274830	TRUE	reported	LifyBm	90274830	2	TRUE	NA	NA	0.00152712	14721	1.53e-06	80610	TRUE
313	rs138557324	T	C	T	C	-0.2253	-0.0547	0.0196	0.0217	FALSE	FALSE	FALSE	ebi-a-GCST005647	12	119984130	0.0535	80610	0.3064	Amyotrophic lateral sclerosis || id:ebi-a-GCST005647	Amyotrophic lateral sclerosis	Amyotrophic lateral sclerosis || ||	TRUE	igd	NA	NA	NA	NA	NA	NA	NA	90274830	615	0.0473	1.91e-06	14285	90274830	TRUE	reported	LifyBm	90274830	2	TRUE	NA	NA	0.00158596	14285	1.3e-05	80610	TRUE
314	rs1437633	A	C	A	C	-0.079	-0.0134	0.2072	0.2108	FALSE	FALSE	FALSE	ebi-a-GCST005647	11	16272199	0.017	80610	0.4304	Amyotrophic lateral sclerosis || id:ebi-a-GCST005647	Amyotrophic lateral sclerosis	Amyotrophic lateral sclerosis || ||	TRUE	igd	NA	NA	NA	NA	NA	NA	NA	90274830	583	0.0147	7.69e-08	12851	90274830	TRUE	reported	LifyBm	90274830	2	TRUE	NA	NA	0.00224272	12851	7.71e-06	80610	TRUE
315	rs1493936	T	C	T	C	-0.258	0.1578	0.0224	0.0132	FALSE	FALSE	FALSE	ebi-a-GCST005647	8	119777640	0.0737	80610	0.03234	Amyotrophic lateral sclerosis || id:ebi-a-GCST005647	Amyotrophic lateral sclerosis	Amyotrophic lateral sclerosis || ||	TRUE	igd	NA	NA	NA	NA	NA	NA	NA	90274830	194	0.046	2.04e-08	14246	90274830	TRUE	reported	LifyBm	90274830	2	TRUE	NA	NA	0.0022036	14246	5.69e-05	80610	TRUE
316	rs17600346	T	C	T	C	-0.1569	0.0362	0.9631	0.9572	FALSE	FALSE	FALSE	ebi-a-GCST005647	3	172223982	0.0353	80610	0.3056	Amyotrophic lateral sclerosis || id:ebi-a-GCST005647	Amyotrophic lateral sclerosis	Amyotrophic lateral sclerosis || ||	TRUE	igd	NA	NA	NA	NA	NA	NA	NA	90274830	9	0.0299	1.54e-07	14723	90274830	TRUE	reported	LifyBm	90274830	2	TRUE	NA	NA	0.00186704	14723	1.3e-05	80610	TRUE
317	rs192337992	A	G	A	G	-0.1555	0.0108	0.962	0.9574	FALSE	FALSE	FALSE	ebi-a-GCST005647	6	130506773	0.0344	80610	0.753199	Amyotrophic lateral sclerosis || id:ebi-a-GCST005647	Amyotrophic lateral sclerosis	Amyotrophic lateral sclerosis || ||	TRUE	igd	NA	NA	NA	NA	NA	NA	NA	90274830	77	0.0334	3.23e-06	11978	90274830	TRUE	reported	LifyBm	90274830	2	TRUE	NA	NA	0.00180664	11978	1.22e-06	80610	TRUE
318	rs2247769	T	C	T	C	-0.1705	0.0021	0.5577	0.54	FALSE	FALSE	FALSE	ebi-a-GCST005647	8	120081031	0.014	80610	0.8791	Amyotrophic lateral sclerosis || id:ebi-a-GCST005647	Amyotrophic lateral sclerosis	Amyotrophic lateral sclerosis || ||	TRUE	igd	NA	NA	NA	NA	NA	NA	NA	90274830	301	0.0114	1.42e-50	14285	90274830	TRUE	reported	LifyBm	90274830	2	TRUE	NA	NA	0.0154195	14285	2.79e-07	80610	TRUE
319	rs271665	T	C	T	C	-0.0672	0.0075	0.748	0.7717	FALSE	FALSE	FALSE	ebi-a-GCST005647	17	47938521	0.017	80610	0.6583	Amyotrophic lateral sclerosis || id:ebi-a-GCST005647	Amyotrophic lateral sclerosis	Amyotrophic lateral sclerosis || ||	TRUE	igd	NA	NA	NA	NA	NA	NA	NA	90274830	917	0.0129	1.9e-07	14710	90274830	TRUE	reported	LifyBm	90274830	2	TRUE	NA	NA	0.00184164	14710	2.41e-06	80610	TRUE
320	rs28454196	C	G	C	G	-0.2242	0.0168	0.9758	0.9815	FALSE	TRUE	FALSE	ebi-a-GCST005647	4	32870458	0.1298	80610	0.897	Amyotrophic lateral sclerosis || id:ebi-a-GCST005647	Amyotrophic lateral sclerosis	Amyotrophic lateral sclerosis || ||	TRUE	igd	NA	NA	NA	NA	NA	NA	NA	90274830	22	0.0486	3.97e-06	14285	90274830	TRUE	reported	LifyBm	90274830	2	TRUE	NA	NA	0.00148776	14285	2.08e-07	80610	TRUE
321	rs376613127	A	G	A	G	-0.2692	-0.0593	0.0133	0.0169	FALSE	FALSE	FALSE	ebi-a-GCST005647	12	71789031	0.0617	80610	0.3365	Amyotrophic lateral sclerosis || id:ebi-a-GCST005647	Amyotrophic lateral sclerosis	Amyotrophic lateral sclerosis || ||	TRUE	igd	NA	NA	NA	NA	NA	NA	NA	90274830	604	0.0568	2.14e-06	13154	90274830	TRUE	reported	LifyBm	90274830	2	TRUE	NA	NA	0.00170499	13154	1.15e-05	80610	TRUE
322	rs56009454	T	G	T	G	-0.0637	-0.0275	0.3753	0.3811	FALSE	FALSE	FALSE	ebi-a-GCST005647	1	40045085	0.023	80610	0.2312	Amyotrophic lateral sclerosis || id:ebi-a-GCST005647	Amyotrophic lateral sclerosis	Amyotrophic lateral sclerosis || ||	TRUE	igd	NA	NA	NA	NA	NA	NA	NA	90274830	5	0.0139	4.59e-06	10894	90274830	TRUE	reported	LifyBm	90274830	2	TRUE	NA	NA	0.00192444	10894	1.77e-05	80610	TRUE
323	rs58792577	T	C	T	C	-0.0665	0.0279	0.6822	0.6822	FALSE	FALSE	FALSE	ebi-a-GCST005647	8	119805839	0.0147	80610	0.0574897	Amyotrophic lateral sclerosis || id:ebi-a-GCST005647	Amyotrophic lateral sclerosis	Amyotrophic lateral sclerosis || ||	TRUE	igd	NA	NA	NA	NA	NA	NA	NA	90274830	201	0.0119	2.29e-08	14724	90274830	TRUE	reported	LifyBm	90274830	2	TRUE	NA	NA	0.00211671	14724	4.47e-05	80610	TRUE
324	rs6985207	A	C	A	C	0.0522	0.0373	0.5556	0.5498	FALSE	FALSE	FALSE	ebi-a-GCST005647	8	8604423	0.0136	80610	0.00630101	Amyotrophic lateral sclerosis || id:ebi-a-GCST005647	Amyotrophic lateral sclerosis	Amyotrophic lateral sclerosis || ||	TRUE	igd	NA	NA	NA	NA	NA	NA	NA	90274830	83	0.0114	4.67e-06	14285	90274830	TRUE	reported	LifyBm	90274830	2	TRUE	NA	NA	0.0014658	14285	9.33e-05	80610	TRUE
325	rs704	A	G	A	G	-0.1404	0.0212	0.4726	0.4929	FALSE	FALSE	FALSE	ebi-a-GCST005647	17	26694861	0.0138	80610	0.124	Amyotrophic lateral sclerosis || id:ebi-a-GCST005647	Amyotrophic lateral sclerosis	Amyotrophic lateral sclerosis || ||	TRUE	igd	NA	NA	NA	NA	NA	NA	NA	90274830	762	0.0111	1.14e-36	14733	90274830	TRUE	reported	LifyBm	90274830	2	TRUE	NA	NA	0.010744	14733	2.93e-05	80610	TRUE
326	rs74111611	T	C	T	C	-0.1471	0.034	0.9603	0.9634	FALSE	FALSE	FALSE	ebi-a-GCST005647	12	85607051	0.0396	80610	0.3906	Amyotrophic lateral sclerosis || id:ebi-a-GCST005647	Amyotrophic lateral sclerosis	Amyotrophic lateral sclerosis || ||	TRUE	igd	NA	NA	NA	NA	NA	NA	NA	90274830	606	0.0298	7.96e-07	14732	90274830	TRUE	reported	LifyBm	90274830	2	TRUE	NA	NA	0.00165148	14732	9.15e-06	80610	TRUE
327	rs77507094	A	G	A	G	0.1965	-0.0626	0.9791	0.9813	FALSE	FALSE	FALSE	ebi-a-GCST005647	10	55029035	0.0534	80610	0.2408	Amyotrophic lateral sclerosis || id:ebi-a-GCST005647	Amyotrophic lateral sclerosis	Amyotrophic lateral sclerosis || ||	TRUE	igd	NA	NA	NA	NA	NA	NA	NA	90274830	568	0.0429	4.64e-06	14726	90274830	TRUE	reported	LifyBm	90274830	2	TRUE	NA	NA	0.00142287	14726	1.7e-05	80610	TRUE
328	rs9643126	C	G	C	G	0.0837	0.0156	0.4689	0.4033	FALSE	TRUE	TRUE	ebi-a-GCST005647	8	119443927	0.0265	80610	0.5569	Amyotrophic lateral sclerosis || id:ebi-a-GCST005647	Amyotrophic lateral sclerosis	Amyotrophic lateral sclerosis || ||	TRUE	igd	NA	NA	NA	NA	NA	NA	NA	90274830	122	0.0146	9.87e-09	10893	90274830	TRUE	reported	LifyBm	90274830	2	FALSE	NA	NA	0.00300863	10893	4.3e-06	80610	TRUE
329	rs9946923	T	C	T	C	0.172	-0.0134	0.9707	0.9696	FALSE	FALSE	FALSE	ebi-a-GCST005647	18	76523646	0.0411	80610	0.744399	Amyotrophic lateral sclerosis || id:ebi-a-GCST005647	Amyotrophic lateral sclerosis	Amyotrophic lateral sclerosis || ||	TRUE	igd	NA	NA	NA	NA	NA	NA	NA	90274830	919	0.0376	4.77e-06	13230	90274830	TRUE	reported	LifyBm	90274830	2	TRUE	NA	NA	0.00157943	13230	1.32e-06	80610	TRUE
330	rs10412462	A	C	A	C	-0.1731	0.0822	0.0363	0.0323	FALSE	FALSE	FALSE	ebi-a-GCST005647	19	14691684	0.0423	80610	0.0519996	Amyotrophic lateral sclerosis || id:ebi-a-GCST005647	Amyotrophic lateral sclerosis	Amyotrophic lateral sclerosis || ||	TRUE	igd	NA	NA	NA	NA	NA	NA	NA	90274828	38	0.0366	2.25e-06	11790	90274828	TRUE	reported	NWYDIp	90274828	2	TRUE	NA	NA	0.00189395	11790	4.68e-05	80610	TRUE
331	rs113580784	A	G	A	G	-0.2288	0.0952	0.0208	0.0174	FALSE	FALSE	FALSE	ebi-a-GCST005647	20	55469957	0.0663	80610	0.1508	Amyotrophic lateral sclerosis || id:ebi-a-GCST005647	Amyotrophic lateral sclerosis	Amyotrophic lateral sclerosis || ||	TRUE	igd	NA	NA	NA	NA	NA	NA	NA	90274828	42	0.0495	3.8e-06	11768	90274828	TRUE	reported	NWYDIp	90274828	2	TRUE	NA	NA	0.00181253	11768	2.56e-05	80610	TRUE
332	rs148164126	A	G	A	G	0.2217	0.0829	0.022	0.0186	FALSE	FALSE	FALSE	ebi-a-GCST005647	16	25004804	0.0591	80610	0.161	Amyotrophic lateral sclerosis || id:ebi-a-GCST005647	Amyotrophic lateral sclerosis	Amyotrophic lateral sclerosis || ||	TRUE	igd	NA	NA	NA	NA	NA	NA	NA	90274828	30	0.048	3.86e-06	11774	90274828	TRUE	reported	NWYDIp	90274828	2	TRUE	NA	NA	0.00180889	11774	2.44e-05	80610	TRUE
333	rs182274799	A	G	A	G	0.1565	0.0188	0.0646	0.0735	FALSE	FALSE	FALSE	ebi-a-GCST005647	11	10358788	0.0269	80610	0.484299	Amyotrophic lateral sclerosis || id:ebi-a-GCST005647	Amyotrophic lateral sclerosis	Amyotrophic lateral sclerosis || ||	TRUE	igd	NA	NA	NA	NA	NA	NA	NA	90274828	24	0.031	4.46e-07	9461	90274828	TRUE	reported	NWYDIp	90274828	2	TRUE	NA	NA	0.00268715	9461	6.06e-06	80610	TRUE
334	rs29630	T	C	T	C	-0.074	0.0278	0.2493	0.256	FALSE	FALSE	FALSE	ebi-a-GCST005647	5	171026588	0.0168	80610	0.0989396	Amyotrophic lateral sclerosis || id:ebi-a-GCST005647	Amyotrophic lateral sclerosis	Amyotrophic lateral sclerosis || ||	TRUE	igd	NA	NA	NA	NA	NA	NA	NA	90274828	16	0.0159	3.25e-06	11343	90274828	TRUE	reported	NWYDIp	90274828	2	TRUE	NA	NA	0.00190629	11343	3.4e-05	80610	TRUE
335	rs35808217	T	TTTC	T	TTTC	-0.0786	-0.0006	0.6	0.3392	FALSE	FALSE	FALSE	ebi-a-GCST005647	14	64661011	0.0245	80610	0.9803	Amyotrophic lateral sclerosis || id:ebi-a-GCST005647	Amyotrophic lateral sclerosis	Amyotrophic lateral sclerosis || ||	TRUE	igd	NA	NA	NA	NA	NA	NA	NA	90274828	27	0.0171	4.3e-06	7942	90274828	TRUE	reported	NWYDIp	90274828	2	TRUE	NA	NA	0.00265386	7942	7.44e-09	80610	TRUE
336	rs4360502	A	G	A	G	-0.0652	0.0089	0.3445	0.3454	FALSE	FALSE	FALSE	ebi-a-GCST005647	1	214886642	0.0144	80610	0.5381	Amyotrophic lateral sclerosis || id:ebi-a-GCST005647	Amyotrophic lateral sclerosis	Amyotrophic lateral sclerosis || ||	TRUE	igd	NA	NA	NA	NA	NA	NA	NA	90274828	2	0.0141	3.76e-06	11342	90274828	TRUE	reported	NWYDIp	90274828	2	TRUE	NA	NA	0.00188203	11342	4.74e-06	80610	TRUE
337	rs4753678	A	G	A	G	0.087	-0.0429	0.5434	0.4357	FALSE	FALSE	FALSE	ebi-a-GCST005647	11	95201232	0.0245	80610	0.0798804	Amyotrophic lateral sclerosis || id:ebi-a-GCST005647	Amyotrophic lateral sclerosis	Amyotrophic lateral sclerosis || ||	TRUE	igd	NA	NA	NA	NA	NA	NA	NA	90274828	26	0.0178	1.02e-06	7942	90274828	TRUE	reported	NWYDIp	90274828	2	TRUE	NA	NA	0.00299967	7942	3.8e-05	80610	TRUE
338	rs62120726	A	G	A	G	0.0786	-0.0154	0.8077	0.8099	FALSE	FALSE	FALSE	ebi-a-GCST005647	2	15734798	0.0174	80610	0.3756	Amyotrophic lateral sclerosis || id:ebi-a-GCST005647	Amyotrophic lateral sclerosis	Amyotrophic lateral sclerosis || ||	TRUE	igd	NA	NA	NA	NA	NA	NA	NA	90274828	5	0.0172	4.88e-06	11343	90274828	TRUE	reported	NWYDIp	90274828	2	TRUE	NA	NA	0.00183797	11343	9.72e-06	80610	TRUE
339	rs7202385	A	T	A	T	0.0746	-0.0114	0.6725	0.6963	FALSE	TRUE	FALSE	ebi-a-GCST005647	16	26080883	0.0152	80610	0.4552	Amyotrophic lateral sclerosis || id:ebi-a-GCST005647	Amyotrophic lateral sclerosis	Amyotrophic lateral sclerosis || ||	TRUE	igd	NA	NA	NA	NA	NA	NA	NA	90274828	31	0.0157	2.02e-06	9460	90274828	TRUE	reported	NWYDIp	90274828	2	TRUE	NA	NA	0.00238146	9460	6.98e-06	80610	TRUE
340	rs7712604	C	G	C	G	-0.0879	-0.0056	0.6738	0.6674	FALSE	TRUE	FALSE	ebi-a-GCST005647	5	21508959	0.0166	80610	0.7362	Amyotrophic lateral sclerosis || id:ebi-a-GCST005647	Amyotrophic lateral sclerosis	Amyotrophic lateral sclerosis || ||	TRUE	igd	NA	NA	NA	NA	NA	NA	NA	90274828	12	0.0176	5.9e-07	8587	90274828	TRUE	reported	NWYDIp	90274828	2	TRUE	NA	NA	0.00289702	8587	1.41e-06	80610	TRUE
341	rs77216559	T	C	T	C	0.1667	-0.0274	0.958	0.9669	FALSE	FALSE	FALSE	ebi-a-GCST005647	11	4475910	0.0456	80610	0.5481	Amyotrophic lateral sclerosis || id:ebi-a-GCST005647	Amyotrophic lateral sclerosis	Amyotrophic lateral sclerosis || ||	TRUE	igd	NA	NA	NA	NA	NA	NA	NA	90274828	23	0.034	9.44e-07	11791	90274828	TRUE	reported	NWYDIp	90274828	2	TRUE	NA	NA	0.00203494	11791	4.48e-06	80610	TRUE
342	rs8033310	T	C	T	C	0.1332	-0.0206	0.9133	0.9074	FALSE	FALSE	FALSE	ebi-a-GCST005647	15	24046105	0.0297	80610	0.4876	Amyotrophic lateral sclerosis || id:ebi-a-GCST005647	Amyotrophic lateral sclerosis	Amyotrophic lateral sclerosis || ||	TRUE	igd	NA	NA	NA	NA	NA	NA	NA	90274828	28	0.0286	3.2e-06	11343	90274828	TRUE	reported	NWYDIp	90274828	2	TRUE	NA	NA	0.00190895	11343	5.97e-06	80610	TRUE
343	rs908372	C	G	C	G	-0.0622	-0.0008	0.3324	0.3304	FALSE	TRUE	FALSE	ebi-a-GCST005647	2	172434373	0.0147	80610	0.9578	Amyotrophic lateral sclerosis || id:ebi-a-GCST005647	Amyotrophic lateral sclerosis	Amyotrophic lateral sclerosis || ||	TRUE	igd	NA	NA	NA	NA	NA	NA	NA	90274828	7	0.0136	4.8e-06	11773	90274828	TRUE	reported	NWYDIp	90274828	2	TRUE	NA	NA	0.00177386	11773	3.67e-08	80610	TRUE
344	rs10831650	A	G	A	G	0.0692	-0.0035	0.3558	0.3733	FALSE	FALSE	FALSE	ebi-a-GCST005647	11	11644391	0.0144	80610	0.8097	Amyotrophic lateral sclerosis || id:ebi-a-GCST005647	Amyotrophic lateral sclerosis	Amyotrophic lateral sclerosis || ||	TRUE	igd	NA	NA	NA	NA	NA	NA	NA	90274846	369	0.0125	3.09e-08	14288	90274846	TRUE	reported	oz36qv	90274846	2	TRUE	NA	NA	0.00214067	14288	7.33e-07	80610	TRUE
345	rs11136339	T	C	T	C	0.0613	0.0153	0.388	0.4038	FALSE	FALSE	FALSE	ebi-a-GCST005647	8	145013345	0.0141	80610	0.279	Amyotrophic lateral sclerosis || id:ebi-a-GCST005647	Amyotrophic lateral sclerosis	Amyotrophic lateral sclerosis || ||	TRUE	igd	NA	NA	NA	NA	NA	NA	NA	90274846	263	0.0122	5.05e-07	13664	90274846	TRUE	reported	oz36qv	90274846	2	TRUE	NA	NA	0.00184453	13664	1.46e-05	80610	TRUE
346	rs114744971	A	G	A	G	-0.2291	-0.1376	0.9782	0.9836	FALSE	FALSE	FALSE	ebi-a-GCST005647	3	142748221	0.0588	80610	0.0192699	Amyotrophic lateral sclerosis || id:ebi-a-GCST005647	Amyotrophic lateral sclerosis	Amyotrophic lateral sclerosis || ||	TRUE	igd	NA	NA	NA	NA	NA	NA	NA	90274846	195	0.0453	4.25e-07	14245	90274846	TRUE	reported	oz36qv	90274846	2	TRUE	NA	NA	0.00179256	14245	6.79e-05	80610	TRUE
347	rs11738159	T	C	T	C	0.0577	0.0027	0.4339	0.4916	FALSE	FALSE	FALSE	ebi-a-GCST005647	5	167311493	0.0138	80610	0.844	Amyotrophic lateral sclerosis || id:ebi-a-GCST005647	Amyotrophic lateral sclerosis	Amyotrophic lateral sclerosis || ||	TRUE	igd	NA	NA	NA	NA	NA	NA	NA	90274846	234	0.0119	1.24e-06	14288	90274846	TRUE	reported	oz36qv	90274846	2	TRUE	NA	NA	0.00164298	14288	4.75e-07	80610	TRUE
348	rs117550445	C	G	C	G	-0.1855	-0.0421	0.9706	0.9704	FALSE	TRUE	FALSE	ebi-a-GCST005647	12	82487578	0.043	80610	0.3274	Amyotrophic lateral sclerosis || id:ebi-a-GCST005647	Amyotrophic lateral sclerosis	Amyotrophic lateral sclerosis || ||	TRUE	igd	NA	NA	NA	NA	NA	NA	NA	90274846	380	0.0377	8.64e-07	14721	90274846	TRUE	reported	oz36qv	90274846	2	TRUE	NA	NA	0.00164215	14721	1.19e-05	80610	TRUE
349	rs117799464	A	G	A	G	0.2043	0.0326	0.9767	0.9777	FALSE	FALSE	FALSE	ebi-a-GCST005647	6	70731400	0.0518	80610	0.529	Amyotrophic lateral sclerosis || id:ebi-a-GCST005647	Amyotrophic lateral sclerosis	Amyotrophic lateral sclerosis || ||	TRUE	igd	NA	NA	NA	NA	NA	NA	NA	90274846	238	0.0443	3.99e-06	14288	90274846	TRUE	reported	oz36qv	90274846	2	TRUE	NA	NA	0.00148653	14288	4.91e-06	80610	TRUE
350	rs12145644	A	T	A	T	-0.0727	0.0047	0.2484	0.2491	FALSE	TRUE	FALSE	ebi-a-GCST005647	1	162517994	0.0168	80610	0.7807	Amyotrophic lateral sclerosis || id:ebi-a-GCST005647	Amyotrophic lateral sclerosis	Amyotrophic lateral sclerosis || ||	TRUE	igd	NA	NA	NA	NA	NA	NA	NA	90274846	3	0.0141	2.52e-07	14287	90274846	TRUE	reported	oz36qv	90274846	2	TRUE	NA	NA	0.00185756	14287	9.71e-07	80610	TRUE
351	rs12726054	A	G	A	G	0.109	0.0257	0.0734	0.068	FALSE	FALSE	FALSE	ebi-a-GCST005647	1	233623860	0.0292	80610	0.3786	Amyotrophic lateral sclerosis || id:ebi-a-GCST005647	Amyotrophic lateral sclerosis	Amyotrophic lateral sclerosis || ||	TRUE	igd	NA	NA	NA	NA	NA	NA	NA	90274846	15	0.0228	1.75e-06	14721	90274846	TRUE	reported	oz36qv	90274846	2	TRUE	NA	NA	0.00155036	14721	9.61e-06	80610	TRUE
352	rs13107325	T	C	T	C	0.2027	0.0445	0.0696	0.0763	FALSE	FALSE	FALSE	ebi-a-GCST005647	4	103188709	0.0262	80610	0.0894808	Amyotrophic lateral sclerosis || id:ebi-a-GCST005647	Amyotrophic lateral sclerosis	Amyotrophic lateral sclerosis || ||	TRUE	igd	NA	NA	NA	NA	NA	NA	NA	90274846	212	0.0236	8.77e-18	14733	90274846	TRUE	reported	oz36qv	90274846	2	TRUE	NA	NA	0.0049829	14733	3.58e-05	80610	TRUE
353	rs1549072	T	C	T	C	0.2351	0.015	0.9755	0.9814	FALSE	FALSE	FALSE	ebi-a-GCST005647	17	7617454	0.1041	80610	0.8855	Amyotrophic lateral sclerosis || id:ebi-a-GCST005647	Amyotrophic lateral sclerosis	Amyotrophic lateral sclerosis || ||	TRUE	igd	NA	NA	NA	NA	NA	NA	NA	90274846	804	0.0497	2.24e-06	12291	90274846	TRUE	reported	oz36qv	90274846	2	TRUE	NA	NA	0.00181755	12291	2.58e-07	80610	TRUE
354	rs16879825	A	G	A	G	-0.2027	-0.0794	0.9577	0.9795	FALSE	FALSE	FALSE	ebi-a-GCST005647	6	88516736	0.0549	80610	0.1481	Amyotrophic lateral sclerosis || id:ebi-a-GCST005647	Amyotrophic lateral sclerosis	Amyotrophic lateral sclerosis || ||	TRUE	igd	NA	NA	NA	NA	NA	NA	NA	90274846	239	0.0438	3.69e-06	11784	90274846	TRUE	reported	oz36qv	90274846	2	TRUE	NA	NA	0.00181448	11784	2.59e-05	80610	TRUE
355	rs201620545	A	G	A	G	-0.0849	-0.0247	0.8184	0.8225	FALSE	FALSE	FALSE	ebi-a-GCST005647	2	99371601	0.0286	80610	0.3882	Amyotrophic lateral sclerosis || id:ebi-a-GCST005647	Amyotrophic lateral sclerosis	Amyotrophic lateral sclerosis || ||	TRUE	igd	NA	NA	NA	NA	NA	NA	NA	90274846	23	0.0168	4.34e-07	11327	90274846	TRUE	reported	oz36qv	90274846	2	TRUE	NA	NA	0.00224999	11327	9.25e-06	80610	TRUE
356	rs2163333	A	G	A	G	0.1404	-0.0064	0.9522	0.9517	FALSE	FALSE	FALSE	ebi-a-GCST005647	2	53077754	0.0319	80610	0.84	Amyotrophic lateral sclerosis || id:ebi-a-GCST005647	Amyotrophic lateral sclerosis	Amyotrophic lateral sclerosis || ||	TRUE	igd	NA	NA	NA	NA	NA	NA	NA	90274846	19	0.0273	2.71e-07	14719	90274846	TRUE	reported	oz36qv	90274846	2	TRUE	NA	NA	0.00179395	14719	4.99e-07	80610	TRUE
357	rs2738752	A	G	A	G	-0.0591	0.0146	0.6653	0.6548	FALSE	FALSE	FALSE	ebi-a-GCST005647	1	221052765	0.0144	80610	0.3111	Amyotrophic lateral sclerosis || id:ebi-a-GCST005647	Amyotrophic lateral sclerosis	Amyotrophic lateral sclerosis || ||	TRUE	igd	NA	NA	NA	NA	NA	NA	NA	90274846	14	0.0129	4.62e-06	12848	90274846	TRUE	reported	oz36qv	90274846	2	TRUE	NA	NA	0.00163124	12848	1.28e-05	80610	TRUE
358	rs34790908	T	C	T	C	0.211	0.0315	0.2563	0.2666	FALSE	FALSE	FALSE	ebi-a-GCST005647	17	7451110	0.0153	80610	0.03925	Amyotrophic lateral sclerosis || id:ebi-a-GCST005647	Amyotrophic lateral sclerosis	Amyotrophic lateral sclerosis || ||	TRUE	igd	NA	NA	NA	NA	NA	NA	NA	90274846	658	0.0129	3.9e-60	14732	90274846	TRUE	reported	oz36qv	90274846	2	TRUE	NA	NA	0.0178388	14732	5.26e-05	80610	TRUE
359	rs370700488	A	AG	A	AG	-0.0644	-0.0615	0.4998	0.4734	FALSE	FALSE	FALSE	ebi-a-GCST005647	2	174602835	0.0284	80610	0.0301203	Amyotrophic lateral sclerosis || id:ebi-a-GCST005647	Amyotrophic lateral sclerosis	Amyotrophic lateral sclerosis || ||	TRUE	igd	NA	NA	NA	NA	NA	NA	NA	90274846	27	0.014	4.22e-06	10894	90274846	TRUE	reported	oz36qv	90274846	2	TRUE	NA	NA	0.00193894	10894	5.82e-05	80610	TRUE
360	rs3821473	A	G	A	G	-0.0622	-0.028	0.2327	0.2311	FALSE	FALSE	FALSE	ebi-a-GCST005647	3	59625877	0.0161	80610	0.0816	Amyotrophic lateral sclerosis || id:ebi-a-GCST005647	Amyotrophic lateral sclerosis	Amyotrophic lateral sclerosis || ||	TRUE	igd	NA	NA	NA	NA	NA	NA	NA	90274846	31	0.0136	4.8e-06	14736	90274846	TRUE	reported	oz36qv	90274846	2	TRUE	NA	NA	0.00141764	14736	3.75e-05	80610	TRUE
361	rs4882710	T	C	T	C	0.0666	-0.001	0.3457	0.3207	FALSE	FALSE	FALSE	ebi-a-GCST005647	12	129101566	0.0167	80610	0.9519	Amyotrophic lateral sclerosis || id:ebi-a-GCST005647	Amyotrophic lateral sclerosis	Amyotrophic lateral sclerosis || ||	TRUE	igd	NA	NA	NA	NA	NA	NA	NA	90274846	383	0.0131	3.7e-07	14288	90274846	TRUE	reported	oz36qv	90274846	2	TRUE	NA	NA	0.00180597	14288	4.45e-08	80610	TRUE
362	rs56023600	T	C	T	C	-0.0856	-0.0085	0.8764	0.8875	FALSE	FALSE	FALSE	ebi-a-GCST005647	9	5636355	0.0233	80610	0.7142	Amyotrophic lateral sclerosis || id:ebi-a-GCST005647	Amyotrophic lateral sclerosis	Amyotrophic lateral sclerosis || ||	TRUE	igd	NA	NA	NA	NA	NA	NA	NA	90274846	295	0.0186	4.18e-06	14287	90274846	TRUE	reported	oz36qv	90274846	2	TRUE	NA	NA	0.00148046	14287	1.65e-06	80610	TRUE
363	rs58743186	A	G	A	G	-0.0717	0.0129	0.1931	0.2031	FALSE	FALSE	FALSE	ebi-a-GCST005647	11	130975896	0.0169	80610	0.4446	Amyotrophic lateral sclerosis || id:ebi-a-GCST005647	Amyotrophic lateral sclerosis	Amyotrophic lateral sclerosis || ||	TRUE	igd	NA	NA	NA	NA	NA	NA	NA	90274846	377	0.0154	3.23e-06	12818	90274846	TRUE	reported	oz36qv	90274846	2	TRUE	NA	NA	0.00168854	12818	7.23e-06	80610	TRUE
364	rs62059693	T	C	T	C	0.1069	-0.0242	0.8557	0.8433	FALSE	FALSE	FALSE	ebi-a-GCST005647	17	7723513	0.0194	80610	0.214	Amyotrophic lateral sclerosis || id:ebi-a-GCST005647	Amyotrophic lateral sclerosis	Amyotrophic lateral sclerosis || ||	TRUE	igd	NA	NA	NA	NA	NA	NA	NA	90274846	854	0.0173	6.44e-10	14288	90274846	TRUE	reported	oz36qv	90274846	2	TRUE	NA	NA	0.00266559	14288	1.93e-05	80610	TRUE
365	rs7019909	T	C	T	C	-0.0897	0.0256	0.1102	0.1025	FALSE	FALSE	FALSE	ebi-a-GCST005647	9	33113322	0.0224	80610	0.2527	Amyotrophic lateral sclerosis || id:ebi-a-GCST005647	Amyotrophic lateral sclerosis	Amyotrophic lateral sclerosis || ||	TRUE	igd	NA	NA	NA	NA	NA	NA	NA	90274846	296	0.0193	3.36e-06	14288	90274846	TRUE	reported	oz36qv	90274846	2	TRUE	NA	NA	0.00150974	14288	1.62e-05	80610	TRUE
366	rs73133996	C	G	C	G	0.0812	-0.0264	0.4558	0.4575	FALSE	TRUE	TRUE	ebi-a-GCST005647	3	98429219	0.0138	80610	0.0555201	Amyotrophic lateral sclerosis || id:ebi-a-GCST005647	Amyotrophic lateral sclerosis	Amyotrophic lateral sclerosis || ||	TRUE	igd	NA	NA	NA	NA	NA	NA	NA	90274846	51	0.012	1.32e-11	14288	90274846	TRUE	reported	oz36qv	90274846	2	FALSE	NA	NA	0.00319484	14288	4.54e-05	80610	TRUE
367	rs73590361	T	C	T	C	-0.0744	0.0177	0.1517	0.1479	FALSE	FALSE	FALSE	ebi-a-GCST005647	12	592399	0.0197	80610	0.3682	Amyotrophic lateral sclerosis || id:ebi-a-GCST005647	Amyotrophic lateral sclerosis	Amyotrophic lateral sclerosis || ||	TRUE	igd	NA	NA	NA	NA	NA	NA	NA	90274846	378	0.0161	3.82e-06	14726	90274846	TRUE	reported	oz36qv	90274846	2	TRUE	NA	NA	0.00144823	14726	1e-05	80610	TRUE
368	rs74351250	A	G	A	G	-0.2729	-0.0066	0.044	0.0463	FALSE	FALSE	FALSE	ebi-a-GCST005647	17	7569542	0.0373	80610	0.8603	Amyotrophic lateral sclerosis || id:ebi-a-GCST005647	Amyotrophic lateral sclerosis	Amyotrophic lateral sclerosis || ||	TRUE	igd	NA	NA	NA	NA	NA	NA	NA	90274846	796	0.0326	5.71e-17	14288	90274846	TRUE	reported	oz36qv	90274846	2	TRUE	NA	NA	0.00488131	14288	3.88e-07	80610	TRUE
369	rs76047473	T	C	T	C	0.1318	0.0148	0.0482	0.0488	FALSE	FALSE	FALSE	ebi-a-GCST005647	10	132815955	0.0341	80610	0.6635	Amyotrophic lateral sclerosis || id:ebi-a-GCST005647	Amyotrophic lateral sclerosis	Amyotrophic lateral sclerosis || ||	TRUE	igd	NA	NA	NA	NA	NA	NA	NA	90274846	368	0.0286	4.06e-06	14718	90274846	TRUE	reported	oz36qv	90274846	2	TRUE	NA	NA	0.00144106	14718	2.34e-06	80610	TRUE
370	rs76133364	A	C	A	C	0.1896	0.0045	0.0315	0.0257	FALSE	FALSE	FALSE	ebi-a-GCST005647	19	19706214	0.0483	80610	0.9255	Amyotrophic lateral sclerosis || id:ebi-a-GCST005647	Amyotrophic lateral sclerosis	Amyotrophic lateral sclerosis || ||	TRUE	igd	NA	NA	NA	NA	NA	NA	NA	90274846	883	0.0369	2.77e-07	13224	90274846	TRUE	reported	oz36qv	90274846	2	TRUE	NA	NA	0.00199278	13224	1.08e-07	80610	TRUE
371	rs78254232	T	C	T	C	-0.2108	0.0029	0.9813	0.9869	FALSE	FALSE	FALSE	ebi-a-GCST005647	3	174384187	0.105	80610	0.9778	Amyotrophic lateral sclerosis || id:ebi-a-GCST005647	Amyotrophic lateral sclerosis	Amyotrophic lateral sclerosis || ||	TRUE	igd	NA	NA	NA	NA	NA	NA	NA	90274846	202	0.0456	3.79e-06	14248	90274846	TRUE	reported	oz36qv	90274846	2	TRUE	NA	NA	0.00149785	14248	9.46e-09	80610	TRUE
372	rs9842051	C	G	C	G	0.1192	-0.0146	0.748	0.7369	FALSE	TRUE	FALSE	ebi-a-GCST005647	3	143021856	0.0159	80610	0.3583	Amyotrophic lateral sclerosis || id:ebi-a-GCST005647	Amyotrophic lateral sclerosis	Amyotrophic lateral sclerosis || ||	TRUE	igd	NA	NA	NA	NA	NA	NA	NA	90274846	197	0.014	1.68e-17	14288	90274846	TRUE	reported	oz36qv	90274846	2	TRUE	NA	NA	0.00504879	14288	1.05e-05	80610	TRUE
373	rs10067443	T	C	T	C	-0.0753	-0.0037	0.8011	0.7968	FALSE	FALSE	FALSE	ebi-a-GCST005647	5	19244332	0.0173	80610	0.8286	Amyotrophic lateral sclerosis || id:ebi-a-GCST005647	Amyotrophic lateral sclerosis	Amyotrophic lateral sclerosis || ||	TRUE	igd	NA	NA	NA	NA	NA	NA	NA	90274795	52	0.0149	4.33e-07	14296	90274795	TRUE	reported	rQHPNn	90274795	2	TRUE	NA	NA	0.00178356	14296	5.67e-07	80610	TRUE
374	rs11443190	A	AG	A	AG	0.0622	0.0179	0.5045	0.5014	FALSE	FALSE	FALSE	ebi-a-GCST005647	22	32844853	0.0146	80610	0.221	Amyotrophic lateral sclerosis || id:ebi-a-GCST005647	Amyotrophic lateral sclerosis	Amyotrophic lateral sclerosis || ||	TRUE	igd	NA	NA	NA	NA	NA	NA	NA	90274795	2241	0.0133	2.92e-06	11326	90274795	TRUE	reported	rQHPNn	90274795	2	TRUE	NA	NA	0.0019277	11326	1.86e-05	80610	TRUE
375	rs12123181	A	G	A	G	-0.0996	0.0149	0.2042	0.2114	FALSE	FALSE	FALSE	ebi-a-GCST005647	1	206954566	0.0177	80610	0.3999	Amyotrophic lateral sclerosis || id:ebi-a-GCST005647	Amyotrophic lateral sclerosis	Amyotrophic lateral sclerosis || ||	TRUE	igd	NA	NA	NA	NA	NA	NA	NA	90274795	27	0.0151	4.22e-11	14296	90274795	TRUE	reported	rQHPNn	90274795	2	TRUE	NA	NA	0.00303453	14296	8.79e-06	80610	TRUE
376	rs138203589	T	G	T	G	0.1937	-0.0814	0.0455	0.0207	FALSE	FALSE	FALSE	ebi-a-GCST005647	2	125939274	0.057	80610	0.1535	Amyotrophic lateral sclerosis || id:ebi-a-GCST005647	Amyotrophic lateral sclerosis	Amyotrophic lateral sclerosis || ||	TRUE	igd	NA	NA	NA	NA	NA	NA	NA	90274795	41	0.0418	3.59e-06	14730	90274795	TRUE	reported	rQHPNn	90274795	2	TRUE	NA	NA	0.0014559	14730	2.53e-05	80610	TRUE
377	rs148332061	C	G	C	G	0.1112	0.0423	0.1005	0.0875	FALSE	TRUE	FALSE	ebi-a-GCST005647	7	590757	0.0448	80610	0.3451	Amyotrophic lateral sclerosis || id:ebi-a-GCST005647	Amyotrophic lateral sclerosis	Amyotrophic lateral sclerosis || ||	TRUE	igd	NA	NA	NA	NA	NA	NA	NA	90274795	2170	0.0239	3.28e-06	13232	90274795	TRUE	reported	rQHPNn	90274795	2	TRUE	NA	NA	0.00163359	13232	1.11e-05	80610	TRUE
378	rs17654493	T	C	T	C	0.2951	0.01	0.014	0.0165	FALSE	FALSE	FALSE	ebi-a-GCST005647	6	18825879	0.0728	80610	0.891	Amyotrophic lateral sclerosis || id:ebi-a-GCST005647	Amyotrophic lateral sclerosis	Amyotrophic lateral sclerosis || ||	TRUE	igd	NA	NA	NA	NA	NA	NA	NA	90274795	70	0.0626	2.43e-06	12313	90274795	TRUE	reported	rQHPNn	90274795	2	TRUE	NA	NA	0.00180183	12313	2.34e-07	80610	TRUE
379	rs184284634	A	G	A	G	0.141	-0.0053	0.8437	0.9686	FALSE	FALSE	FALSE	ebi-a-GCST005647	6	32508305	0.0572	80610	0.9262	Amyotrophic lateral sclerosis || id:ebi-a-GCST005647	Amyotrophic lateral sclerosis	Amyotrophic lateral sclerosis || ||	TRUE	igd	NA	NA	NA	NA	NA	NA	NA	90274795	556	0.0275	2.94e-07	8978	90274795	TRUE	reported	rQHPNn	90274795	2	TRUE	NA	NA	0.00292025	8978	1.07e-07	80610	TRUE
380	rs188535859	T	C	T	C	-0.2351	0.0503	0.0174	0.0215	FALSE	FALSE	FALSE	ebi-a-GCST005647	2	201728383	0.0532	80610	0.3444	Amyotrophic lateral sclerosis || id:ebi-a-GCST005647	Amyotrophic lateral sclerosis	Amyotrophic lateral sclerosis || ||	TRUE	igd	NA	NA	NA	NA	NA	NA	NA	90274795	43	0.0486	1.32e-06	14741	90274795	TRUE	reported	rQHPNn	90274795	2	TRUE	NA	NA	0.00158517	14741	1.11e-05	80610	TRUE
381	rs202092984	A	G	A	G	0.1563	-0.0358	0.0498	0.0615	FALSE	FALSE	FALSE	ebi-a-GCST005647	2	87276729	0.037	80610	0.3331	Amyotrophic lateral sclerosis || id:ebi-a-GCST005647	Amyotrophic lateral sclerosis	Amyotrophic lateral sclerosis || ||	TRUE	igd	NA	NA	NA	NA	NA	NA	NA	90274795	38	0.0341	4.57e-06	11768	90274795	TRUE	reported	rQHPNn	90274795	2	TRUE	NA	NA	0.0017824	11768	1.16e-05	80610	TRUE
382	rs2243173	A	T	A	T	-0.1199	-0.0068	0.0681	0.0637	FALSE	TRUE	FALSE	ebi-a-GCST005647	1	207011458	0.0319	80610	0.83	Amyotrophic lateral sclerosis || id:ebi-a-GCST005647	Amyotrophic lateral sclerosis	Amyotrophic lateral sclerosis || ||	TRUE	igd	NA	NA	NA	NA	NA	NA	NA	90274795	36	0.0251	1.78e-06	14296	90274795	TRUE	reported	rQHPNn	90274795	2	TRUE	NA	NA	0.00159384	14296	5.64e-07	80610	TRUE
383	rs3020582	A	C	A	C	0.0634	-0.0134	0.3139	0.3084	FALSE	FALSE	FALSE	ebi-a-GCST005647	6	31351522	0.0149	80610	0.3684	Amyotrophic lateral sclerosis || id:ebi-a-GCST005647	Amyotrophic lateral sclerosis	Amyotrophic lateral sclerosis || ||	TRUE	igd	NA	NA	NA	NA	NA	NA	NA	90274795	122	0.0135	2.65e-06	12860	90274795	TRUE	reported	rQHPNn	90274795	2	TRUE	NA	NA	0.00171235	12860	1e-05	80610	TRUE
384	rs3135932	A	G	A	G	-0.1597	-0.0253	0.823	0.838	FALSE	FALSE	FALSE	ebi-a-GCST005647	11	117864063	0.0189	80610	0.1805	Amyotrophic lateral sclerosis || id:ebi-a-GCST005647	Amyotrophic lateral sclerosis	Amyotrophic lateral sclerosis || ||	TRUE	igd	NA	NA	NA	NA	NA	NA	NA	90274795	2223	0.0154	3.39e-25	14744	90274795	TRUE	reported	rQHPNn	90274795	2	TRUE	NA	NA	0.00724195	14744	2.22e-05	80610	TRUE
385	rs3769274	A	G	A	G	0.0771	-0.0235	0.8403	0.8388	FALSE	FALSE	FALSE	ebi-a-GCST005647	2	173757986	0.0192	80610	0.2198	Amyotrophic lateral sclerosis || id:ebi-a-GCST005647	Amyotrophic lateral sclerosis	Amyotrophic lateral sclerosis || ||	TRUE	igd	NA	NA	NA	NA	NA	NA	NA	90274795	42	0.0162	1.94e-06	14742	90274795	TRUE	reported	rQHPNn	90274795	2	TRUE	NA	NA	0.00153431	14742	1.86e-05	80610	TRUE
386	rs385697	T	C	T	C	0.0555	0.0107	0.6126	0.5217	FALSE	FALSE	FALSE	ebi-a-GCST005647	6	7880027	0.014	80610	0.4457	Amyotrophic lateral sclerosis || id:ebi-a-GCST005647	Amyotrophic lateral sclerosis	Amyotrophic lateral sclerosis || ||	TRUE	igd	NA	NA	NA	NA	NA	NA	NA	90274795	69	0.0119	3.1e-06	14727	90274795	TRUE	reported	rQHPNn	90274795	2	TRUE	NA	NA	0.00147501	14727	7.25e-06	80610	TRUE
387	rs389239	A	G	A	G	-0.0574	0.0108	0.6162	0.6201	FALSE	FALSE	FALSE	ebi-a-GCST005647	6	169465075	0.0152	80610	0.4782	Amyotrophic lateral sclerosis || id:ebi-a-GCST005647	Amyotrophic lateral sclerosis	Amyotrophic lateral sclerosis || ||	TRUE	igd	NA	NA	NA	NA	NA	NA	NA	90274795	2169	0.0125	4.39e-06	14296	90274795	TRUE	reported	rQHPNn	90274795	2	TRUE	NA	NA	0.00147302	14296	6.26e-06	80610	TRUE
388	rs398518	A	G	A	G	-0.1293	0.015	0.9146	0.9208	FALSE	FALSE	FALSE	ebi-a-GCST005647	3	8954959	0.0285	80610	0.599	Amyotrophic lateral sclerosis || id:ebi-a-GCST005647	Amyotrophic lateral sclerosis	Amyotrophic lateral sclerosis || ||	TRUE	igd	NA	NA	NA	NA	NA	NA	NA	90274795	46	0.0218	3.01e-09	14296	90274795	TRUE	reported	rQHPNn	90274795	2	TRUE	NA	NA	0.00245506	14296	3.44e-06	80610	TRUE
389	rs4330681	T	C	T	C	0.2765	-0.2646	0.984	0.9864	FALSE	FALSE	FALSE	ebi-a-GCST005647	8	58737495	0.1336	80610	0.0476705	Amyotrophic lateral sclerosis || id:ebi-a-GCST005647	Amyotrophic lateral sclerosis	Amyotrophic lateral sclerosis || ||	TRUE	igd	NA	NA	NA	NA	NA	NA	NA	90274795	2172	0.0584	2.19e-06	13422	90274795	TRUE	reported	rQHPNn	90274795	2	TRUE	NA	NA	0.00166758	13422	4.87e-05	80610	TRUE
390	rs4655311	A	T	A	T	-0.1204	-0.0094	0.8888	0.8513	FALSE	TRUE	FALSE	ebi-a-GCST005647	1	214111030	0.0409	80610	0.8192	Amyotrophic lateral sclerosis || id:ebi-a-GCST005647	Amyotrophic lateral sclerosis	Amyotrophic lateral sclerosis || ||	TRUE	igd	NA	NA	NA	NA	NA	NA	NA	90274795	37	0.0251	1.61e-06	11767	90274795	TRUE	reported	rQHPNn	90274795	2	TRUE	NA	NA	0.00195193	11767	6.55e-07	80610	TRUE
391	rs4655953	A	G	A	G	0.0565	-0.0074	0.3683	0.3814	FALSE	FALSE	FALSE	ebi-a-GCST005647	1	87832695	0.0141	80610	0.598401	Amyotrophic lateral sclerosis || id:ebi-a-GCST005647	Amyotrophic lateral sclerosis	Amyotrophic lateral sclerosis || ||	TRUE	igd	NA	NA	NA	NA	NA	NA	NA	90274795	4	0.0121	3.02e-06	14722	90274795	TRUE	reported	rQHPNn	90274795	2	TRUE	NA	NA	0.00147902	14722	3.42e-06	80610	TRUE
392	rs60534074	T	C	T	C	-0.0662	-0.0132	0.2151	0.2127	FALSE	FALSE	FALSE	ebi-a-GCST005647	1	206909005	0.017	80610	0.4398	Amyotrophic lateral sclerosis || id:ebi-a-GCST005647	Amyotrophic lateral sclerosis	Amyotrophic lateral sclerosis || ||	TRUE	igd	NA	NA	NA	NA	NA	NA	NA	90274795	5	0.0145	4.98e-06	14295	90274795	TRUE	reported	rQHPNn	90274795	2	TRUE	NA	NA	0.00145621	14295	7.48e-06	80610	TRUE
393	rs66624860	T	C	T	C	0.0681	-0.0149	0.2791	0.2632	FALSE	FALSE	FALSE	ebi-a-GCST005647	8	61861039	0.0159	80610	0.3487	Amyotrophic lateral sclerosis || id:ebi-a-GCST005647	Amyotrophic lateral sclerosis	Amyotrophic lateral sclerosis || ||	TRUE	igd	NA	NA	NA	NA	NA	NA	NA	90274795	2173	0.0143	1.91e-06	12799	90274795	TRUE	reported	rQHPNn	90274795	2	TRUE	NA	NA	0.00176907	12799	1.09e-05	80610	TRUE
394	rs67037615	T	C	T	C	-0.1528	-0.0116	0.8893	0.8923	FALSE	FALSE	FALSE	ebi-a-GCST005647	6	32453163	0.0232	80610	0.615399	Amyotrophic lateral sclerosis || id:ebi-a-GCST005647	Amyotrophic lateral sclerosis	Amyotrophic lateral sclerosis || ||	TRUE	igd	NA	NA	NA	NA	NA	NA	NA	90274795	464	0.0196	6.39e-15	14296	90274795	TRUE	reported	rQHPNn	90274795	2	TRUE	NA	NA	0.00423388	14296	3.1e-06	80610	TRUE
395	rs72701782	A	G	A	G	0.0981	-0.0014	0.0999	0.1034	FALSE	FALSE	FALSE	ebi-a-GCST005647	4	185304872	0.025	80610	0.9551	Amyotrophic lateral sclerosis || id:ebi-a-GCST005647	Amyotrophic lateral sclerosis	Amyotrophic lateral sclerosis || ||	TRUE	igd	NA	NA	NA	NA	NA	NA	NA	90274795	48	0.0211	3.33e-06	14296	90274795	TRUE	reported	rQHPNn	90274795	2	TRUE	NA	NA	0.00150995	14296	3.89e-08	80610	TRUE
396	rs76932862	T	C	T	C	0.1401	0.0209	0.1028	0.1134	FALSE	FALSE	FALSE	ebi-a-GCST005647	14	20318041	0.0406	80610	0.6067	Amyotrophic lateral sclerosis || id:ebi-a-GCST005647	Amyotrophic lateral sclerosis	Amyotrophic lateral sclerosis || ||	TRUE	igd	NA	NA	NA	NA	NA	NA	NA	90274795	2238	0.0291	1.48e-06	12412	90274795	TRUE	reported	rQHPNn	90274795	2	TRUE	NA	NA	0.00186427	12412	3.29e-06	80610	TRUE
397	rs77654292	T	C	T	C	0.1735	0.0708	0.027	0.0229	FALSE	FALSE	FALSE	ebi-a-GCST005647	1	206974552	0.0499	80610	0.156	Amyotrophic lateral sclerosis || id:ebi-a-GCST005647	Amyotrophic lateral sclerosis	Amyotrophic lateral sclerosis || ||	TRUE	igd	NA	NA	NA	NA	NA	NA	NA	90274795	34	0.0374	3.5e-06	14731	90274795	TRUE	reported	rQHPNn	90274795	2	TRUE	NA	NA	0.00145898	14731	2.5e-05	80610	TRUE
398	rs79438518	A	T	A	T	-0.2845	0.0947	0.0122	0.0114	FALSE	TRUE	FALSE	ebi-a-GCST005647	9	18625666	0.1114	80610	0.3952	Amyotrophic lateral sclerosis || id:ebi-a-GCST005647	Amyotrophic lateral sclerosis	Amyotrophic lateral sclerosis || ||	TRUE	igd	NA	NA	NA	NA	NA	NA	NA	90274795	2175	0.0618	4.15e-06	13809	90274795	TRUE	reported	rQHPNn	90274795	2	TRUE	NA	NA	0.00153258	13809	8.96e-06	80610	TRUE
399	rs1034059	A	G	A	G	0.076	-0.0034	0.6981	0.7076	FALSE	FALSE	FALSE	ebi-a-GCST005647	6	158193698	0.0173	80610	0.846	Amyotrophic lateral sclerosis || id:ebi-a-GCST005647	Amyotrophic lateral sclerosis	Amyotrophic lateral sclerosis || ||	TRUE	igd	NA	NA	NA	NA	NA	NA	NA	90274834	16	0.0145	1.59e-07	14288	90274834	TRUE	reported	uyS46A	90274834	2	TRUE	NA	NA	0.00191931	14288	4.79e-07	80610	TRUE
400	rs11115639	A	C	A	C	-0.0841	0.0017	0.8864	0.8845	FALSE	FALSE	FALSE	ebi-a-GCST005647	12	83600525	0.0217	80610	0.9364	Amyotrophic lateral sclerosis || id:ebi-a-GCST005647	Amyotrophic lateral sclerosis	Amyotrophic lateral sclerosis || ||	TRUE	igd	NA	NA	NA	NA	NA	NA	NA	90274834	30	0.0184	4.86e-06	14730	90274834	TRUE	reported	uyS46A	90274834	2	TRUE	NA	NA	0.00141644	14730	7.61e-08	80610	TRUE
401	rs115455827	A	G	A	G	0.1277	0.0081	0.9506	0.9592	FALSE	FALSE	FALSE	ebi-a-GCST005647	5	78787853	0.0378	80610	0.8304	Amyotrophic lateral sclerosis || id:ebi-a-GCST005647	Amyotrophic lateral sclerosis	Amyotrophic lateral sclerosis || ||	TRUE	igd	NA	NA	NA	NA	NA	NA	NA	90274834	8	0.0277	4.02e-06	14735	90274834	TRUE	reported	uyS46A	90274834	2	TRUE	NA	NA	0.00144047	14735	5.7e-07	80610	TRUE
402	rs116198125	T	C	T	C	-0.1521	0.0038	0.9617	0.9663	FALSE	FALSE	FALSE	ebi-a-GCST005647	3	14613224	0.0413	80610	0.9267	Amyotrophic lateral sclerosis || id:ebi-a-GCST005647	Amyotrophic lateral sclerosis	Amyotrophic lateral sclerosis || ||	TRUE	igd	NA	NA	NA	NA	NA	NA	NA	90274834	4	0.0329	3.78e-06	14727	90274834	TRUE	reported	uyS46A	90274834	2	TRUE	NA	NA	0.00144938	14727	1.05e-07	80610	TRUE
403	rs12152184	A	G	A	G	0.0965	-0.0139	0.885	0.8817	FALSE	FALSE	FALSE	ebi-a-GCST005647	22	45002809	0.0228	80610	0.5406	Amyotrophic lateral sclerosis || id:ebi-a-GCST005647	Amyotrophic lateral sclerosis	Amyotrophic lateral sclerosis || ||	TRUE	igd	NA	NA	NA	NA	NA	NA	NA	90274834	66	0.0208	3.49e-06	12402	90274834	TRUE	reported	uyS46A	90274834	2	TRUE	NA	NA	0.00173282	12402	4.61e-06	80610	TRUE
404	rs12460327	C	G	C	G	-0.0751	-0.0115	0.8169	0.8141	FALSE	TRUE	FALSE	ebi-a-GCST005647	19	39410986	0.0178	80610	0.517399	Amyotrophic lateral sclerosis || id:ebi-a-GCST005647	Amyotrophic lateral sclerosis	Amyotrophic lateral sclerosis || ||	TRUE	igd	NA	NA	NA	NA	NA	NA	NA	90274834	52	0.0152	7.78e-07	14727	90274834	TRUE	reported	uyS46A	90274834	2	TRUE	NA	NA	0.00165508	14727	5.18e-06	80610	TRUE
405	rs12531843	C	G	C	G	-0.1286	0.0003	0.9177	0.9197	FALSE	TRUE	FALSE	ebi-a-GCST005647	7	14143486	0.0279	80610	0.9902	Amyotrophic lateral sclerosis || id:ebi-a-GCST005647	Amyotrophic lateral sclerosis	Amyotrophic lateral sclerosis || ||	TRUE	igd	NA	NA	NA	NA	NA	NA	NA	90274834	17	0.0243	1.21e-07	12404	90274834	TRUE	reported	uyS46A	90274834	2	TRUE	NA	NA	0.00225319	12404	1.43e-09	80610	TRUE
406	rs138897138	A	G	A	G	0.104	0.0026	0.9138	0.9129	FALSE	FALSE	FALSE	ebi-a-GCST005647	2	122731427	0.0256	80610	0.9185	Amyotrophic lateral sclerosis || id:ebi-a-GCST005647	Amyotrophic lateral sclerosis	Amyotrophic lateral sclerosis || ||	TRUE	igd	NA	NA	NA	NA	NA	NA	NA	90274834	2	0.0218	1.84e-06	14288	90274834	TRUE	reported	uyS46A	90274834	2	TRUE	NA	NA	0.00159057	14288	1.28e-07	80610	TRUE
407	rs147383134	T	C	T	C	0.2573	-0.077	0.9858	0.9889	FALSE	FALSE	FALSE	ebi-a-GCST005647	8	89590527	0.1169	80610	0.5104	Amyotrophic lateral sclerosis || id:ebi-a-GCST005647	Amyotrophic lateral sclerosis	Amyotrophic lateral sclerosis || ||	TRUE	igd	NA	NA	NA	NA	NA	NA	NA	90274834	21	0.0551	3.02e-06	13801	90274834	TRUE	reported	uyS46A	90274834	2	TRUE	NA	NA	0.00157777	13801	5.38e-06	80610	TRUE
408	rs60459634	A	G	A	G	-0.1063	0.0081	0.0886	0.0768	FALSE	FALSE	FALSE	ebi-a-GCST005647	4	160629137	0.0308	80610	0.791899	Amyotrophic lateral sclerosis || id:ebi-a-GCST005647	Amyotrophic lateral sclerosis	Amyotrophic lateral sclerosis || ||	TRUE	igd	NA	NA	NA	NA	NA	NA	NA	90274834	7	0.0229	3.45e-06	14288	90274834	TRUE	reported	uyS46A	90274834	2	TRUE	NA	NA	0.00150602	14288	8.58e-07	80610	TRUE
409	rs7718478	A	T	A	T	0.0639	-0.0128	0.7496	0.7441	FALSE	TRUE	FALSE	ebi-a-GCST005647	5	177560339	0.0158	80610	0.4184	Amyotrophic lateral sclerosis || id:ebi-a-GCST005647	Amyotrophic lateral sclerosis	Amyotrophic lateral sclerosis || ||	TRUE	igd	NA	NA	NA	NA	NA	NA	NA	90274834	11	0.0138	3.65e-06	14288	90274834	TRUE	reported	uyS46A	90274834	2	TRUE	NA	NA	0.00149859	14288	8.14e-06	80610	TRUE
410	rs77381020	T	C	T	C	0.0862	-0.0112	0.8546	0.8673	FALSE	FALSE	FALSE	ebi-a-GCST005647	13	37413465	0.0231	80610	0.628699	Amyotrophic lateral sclerosis || id:ebi-a-GCST005647	Amyotrophic lateral sclerosis	Amyotrophic lateral sclerosis || ||	TRUE	igd	NA	NA	NA	NA	NA	NA	NA	90274834	32	0.0184	2.8e-06	14288	90274834	TRUE	reported	uyS46A	90274834	2	TRUE	NA	NA	0.00153392	14288	2.92e-06	80610	TRUE
411	rs1072074	A	G	A	G	-0.0649	0.0062	0.5847	0.6045	FALSE	FALSE	FALSE	ebi-a-GCST005647	4	24758319	0.0164	80610	0.7055	Amyotrophic lateral sclerosis || id:ebi-a-GCST005647	Amyotrophic lateral sclerosis	Amyotrophic lateral sclerosis || ||	TRUE	igd	NA	NA	NA	NA	NA	NA	NA	90274802	17	0.0141	4.17e-06	11785	90274802	TRUE	reported	wqX5i1	90274802	2	TRUE	NA	NA	0.0017948	11785	1.77e-06	80610	TRUE
412	rs10870773	A	G	A	G	-0.0816	-0.0024	0.8025	0.8225	FALSE	FALSE	FALSE	ebi-a-GCST005647	13	44396409	0.0178	80610	0.893	Amyotrophic lateral sclerosis || id:ebi-a-GCST005647	Amyotrophic lateral sclerosis	Amyotrophic lateral sclerosis || ||	TRUE	igd	NA	NA	NA	NA	NA	NA	NA	90274802	148	0.0171	1.82e-06	11345	90274802	TRUE	reported	wqX5i1	90274802	2	TRUE	NA	NA	0.0020035	11345	2.26e-07	80610	TRUE
413	rs114882743	A	T	A	T	-0.3259	-0.0571	0.9804	0.9841	FALSE	TRUE	FALSE	ebi-a-GCST005647	1	176930254	0.0615	80610	0.3536	Amyotrophic lateral sclerosis || id:ebi-a-GCST005647	Amyotrophic lateral sclerosis	Amyotrophic lateral sclerosis || ||	TRUE	igd	NA	NA	NA	NA	NA	NA	NA	90274802	4	0.0548	2.73e-09	11345	90274802	TRUE	reported	wqX5i1	90274802	2	TRUE	NA	NA	0.00310833	11345	1.07e-05	80610	TRUE
414	rs11931996	T	C	T	C	-0.1219	0.0356	0.9068	0.9029	FALSE	FALSE	FALSE	ebi-a-GCST005647	4	152291909	0.028	80610	0.2038	Amyotrophic lateral sclerosis || id:ebi-a-GCST005647	Amyotrophic lateral sclerosis	Amyotrophic lateral sclerosis || ||	TRUE	igd	NA	NA	NA	NA	NA	NA	NA	90274802	18	0.0262	3.28e-06	11345	90274802	TRUE	reported	wqX5i1	90274802	2	TRUE	NA	NA	0.0019048	11345	2.01e-05	80610	TRUE
415	rs12092228	T	G	T	G	0.1508	-0.0114	0.0512	0.0491	FALSE	FALSE	FALSE	ebi-a-GCST005647	1	242536005	0.0329	80610	0.7293	Amyotrophic lateral sclerosis || id:ebi-a-GCST005647	Amyotrophic lateral sclerosis	Amyotrophic lateral sclerosis || ||	TRUE	igd	NA	NA	NA	NA	NA	NA	NA	90274802	6	0.0327	4e-06	9892	90274802	TRUE	reported	wqX5i1	90274802	2	TRUE	NA	NA	0.00214574	9892	1.49e-06	80610	TRUE
416	rs12445031	C	G	C	G	-0.09	0.0354	0.1382	0.1435	FALSE	TRUE	FALSE	ebi-a-GCST005647	16	76626873	0.0216	80610	0.1012	Amyotrophic lateral sclerosis || id:ebi-a-GCST005647	Amyotrophic lateral sclerosis	Amyotrophic lateral sclerosis || ||	TRUE	igd	NA	NA	NA	NA	NA	NA	NA	90274802	172	0.0195	3.92e-06	11339	90274802	TRUE	reported	wqX5i1	90274802	2	TRUE	NA	NA	0.00187544	11339	3.33e-05	80610	TRUE
417	rs12863903	T	C	T	C	-0.0857	-0.0122	0.1597	0.1703	FALSE	FALSE	FALSE	ebi-a-GCST005647	13	96638651	0.0182	80610	0.5017	Amyotrophic lateral sclerosis || id:ebi-a-GCST005647	Amyotrophic lateral sclerosis	Amyotrophic lateral sclerosis || ||	TRUE	igd	NA	NA	NA	NA	NA	NA	NA	90274802	155	0.018	1.93e-06	11345	90274802	TRUE	reported	wqX5i1	90274802	2	TRUE	NA	NA	0.00199444	11345	5.57e-06	80610	TRUE
418	rs12895022	T	C	T	C	0.1091	-0.0433	0.0906	0.0871	FALSE	FALSE	FALSE	ebi-a-GCST005647	14	102333234	0.0254	80610	0.0891497	Amyotrophic lateral sclerosis || id:ebi-a-GCST005647	Amyotrophic lateral sclerosis	Amyotrophic lateral sclerosis || ||	TRUE	igd	NA	NA	NA	NA	NA	NA	NA	90274802	164	0.0236	3.78e-06	11774	90274802	TRUE	reported	wqX5i1	90274802	2	TRUE	NA	NA	0.00181212	11774	3.61e-05	80610	TRUE
419	rs143118566	A	G	A	G	-0.2336	0.0218	0.9734	0.9789	FALSE	FALSE	FALSE	ebi-a-GCST005647	16	593000	0.0652	80610	0.738401	Amyotrophic lateral sclerosis || id:ebi-a-GCST005647	Amyotrophic lateral sclerosis	Amyotrophic lateral sclerosis || ||	TRUE	igd	NA	NA	NA	NA	NA	NA	NA	90274802	168	0.0508	4.26e-06	10281	90274802	TRUE	reported	wqX5i1	90274802	2	TRUE	NA	NA	0.00205293	10281	1.39e-06	80610	TRUE
420	rs149756404	A	C	A	C	-0.2749	-0.0354	0.9809	0.9776	FALSE	FALSE	FALSE	ebi-a-GCST005647	2	239715033	0.0506	80610	0.4838	Amyotrophic lateral sclerosis || id:ebi-a-GCST005647	Amyotrophic lateral sclerosis	Amyotrophic lateral sclerosis || ||	TRUE	igd	NA	NA	NA	NA	NA	NA	NA	90274802	11	0.0524	1.55e-07	11302	90274802	TRUE	reported	wqX5i1	90274802	2	TRUE	NA	NA	0.0024297	11302	6.07e-06	80610	TRUE
421	rs17700884	T	G	T	G	-0.105	-0.0183	0.3783	0.3525	FALSE	FALSE	FALSE	ebi-a-GCST005647	16	88684495	0.0144	80610	0.2032	Amyotrophic lateral sclerosis || id:ebi-a-GCST005647	Amyotrophic lateral sclerosis	Amyotrophic lateral sclerosis || ||	TRUE	igd	NA	NA	NA	NA	NA	NA	NA	90274802	216	0.0136	1.16e-14	11775	90274802	TRUE	reported	wqX5i1	90274802	2	TRUE	NA	NA	0.00503756	11775	2e-05	80610	TRUE
422	rs1920106	T	C	T	C	0.0633	-0.0094	0.3948	0.4819	FALSE	FALSE	FALSE	ebi-a-GCST005647	7	21240100	0.014	80610	0.5025	Amyotrophic lateral sclerosis || id:ebi-a-GCST005647	Amyotrophic lateral sclerosis	Amyotrophic lateral sclerosis || ||	TRUE	igd	NA	NA	NA	NA	NA	NA	NA	90274802	133	0.0132	1.62e-06	11792	90274802	TRUE	reported	wqX5i1	90274802	2	TRUE	NA	NA	0.0019467	11792	5.59e-06	80610	TRUE
423	rs199658824	T	TG	T	TG	-0.2362	0.0015	0.9733	0.9701	FALSE	FALSE	FALSE	ebi-a-GCST005647	12	52739413	0.0406	80610	0.971	Amyotrophic lateral sclerosis || id:ebi-a-GCST005647	Amyotrophic lateral sclerosis	Amyotrophic lateral sclerosis || ||	TRUE	igd	NA	NA	NA	NA	NA	NA	NA	90274802	141	0.0468	4.49e-07	8391	90274802	TRUE	reported	wqX5i1	90274802	2	TRUE	NA	NA	0.0030272	8391	1.69e-08	80610	TRUE
424	rs2814092	C	G	C	G	0.0624	-0.0056	0.6437	0.6467	FALSE	TRUE	FALSE	ebi-a-GCST005647	6	66547346	0.0142	80610	0.6947	Amyotrophic lateral sclerosis || id:ebi-a-GCST005647	Amyotrophic lateral sclerosis	Amyotrophic lateral sclerosis || ||	TRUE	igd	NA	NA	NA	NA	NA	NA	NA	90274802	132	0.0135	3.8e-06	11792	90274802	TRUE	reported	wqX5i1	90274802	2	TRUE	NA	NA	0.00180885	11792	1.93e-06	80610	TRUE
425	rs39779	C	G	C	G	0.1077	0.001	0.1032	0.0968	FALSE	TRUE	FALSE	ebi-a-GCST005647	16	8393906	0.0237	80610	0.9675	Amyotrophic lateral sclerosis || id:ebi-a-GCST005647	Amyotrophic lateral sclerosis	Amyotrophic lateral sclerosis || ||	TRUE	igd	NA	NA	NA	NA	NA	NA	NA	90274802	169	0.0227	2.09e-06	11345	90274802	TRUE	reported	wqX5i1	90274802	2	TRUE	NA	NA	0.00198057	11345	2.21e-08	80610	TRUE
426	rs59356989	A	G	A	G	-0.0882	0.0217	0.8432	0.8518	FALSE	FALSE	FALSE	ebi-a-GCST005647	5	107423766	0.0194	80610	0.264	Amyotrophic lateral sclerosis || id:ebi-a-GCST005647	Amyotrophic lateral sclerosis	Amyotrophic lateral sclerosis || ||	TRUE	igd	NA	NA	NA	NA	NA	NA	NA	90274802	47	0.0177	6.26e-07	11790	90274802	TRUE	reported	wqX5i1	90274802	2	TRUE	NA	NA	0.00210202	11790	1.55e-05	80610	TRUE
427	rs72815428	T	C	T	C	-0.1673	0.0197	0.0423	0.0379	FALSE	FALSE	FALSE	ebi-a-GCST005647	5	174836306	0.0403	80610	0.625299	Amyotrophic lateral sclerosis || id:ebi-a-GCST005647	Amyotrophic lateral sclerosis	Amyotrophic lateral sclerosis || ||	TRUE	igd	NA	NA	NA	NA	NA	NA	NA	90274802	128	0.0366	4.85e-06	11775	90274802	TRUE	reported	wqX5i1	90274802	2	TRUE	NA	NA	0.00177163	11775	2.96e-06	80610	TRUE
428	rs75246422	T	C	T	C	-0.0951	-0.0048	0.1233	0.1129	FALSE	FALSE	FALSE	ebi-a-GCST005647	5	174179760	0.0225	80610	0.83	Amyotrophic lateral sclerosis || id:ebi-a-GCST005647	Amyotrophic lateral sclerosis	Amyotrophic lateral sclerosis || ||	TRUE	igd	NA	NA	NA	NA	NA	NA	NA	90274802	126	0.0201	2.23e-06	11793	90274802	TRUE	reported	wqX5i1	90274802	2	TRUE	NA	NA	0.00189494	11793	5.65e-07	80610	TRUE
429	rs77654242	T	G	T	G	-0.2174	-0.0584	0.9707	0.9647	FALSE	FALSE	FALSE	ebi-a-GCST005647	2	136675328	0.0556	80610	0.2936	Amyotrophic lateral sclerosis || id:ebi-a-GCST005647	Amyotrophic lateral sclerosis	Amyotrophic lateral sclerosis || ||	TRUE	igd	NA	NA	NA	NA	NA	NA	NA	90274802	7	0.0469	3.56e-06	10294	90274802	TRUE	reported	wqX5i1	90274802	2	TRUE	NA	NA	0.00208338	10294	1.37e-05	80610	TRUE
430	rs8015296	C	G	C	G	-0.1162	0.0072	0.0991	0.1025	FALSE	TRUE	FALSE	ebi-a-GCST005647	14	92763907	0.0228	80610	0.7527	Amyotrophic lateral sclerosis || id:ebi-a-GCST005647	Amyotrophic lateral sclerosis	Amyotrophic lateral sclerosis || ||	TRUE	igd	NA	NA	NA	NA	NA	NA	NA	90274802	162	0.0253	4.37e-06	9461	90274802	TRUE	reported	wqX5i1	90274802	2	TRUE	NA	NA	0.00222515	9461	1.24e-06	80610	TRUE
431	rs111865607	T	C	T	C	-0.1077	-0.0145	0.2079	0.22	FALSE	FALSE	FALSE	ebi-a-GCST005647	14	88422929	0.0295	80610	0.6234	Amyotrophic lateral sclerosis || id:ebi-a-GCST005647	Amyotrophic lateral sclerosis	Amyotrophic lateral sclerosis || ||	TRUE	igd	NA	NA	NA	NA	NA	NA	NA	90274831	498	0.0178	1.44e-09	10894	90274831	TRUE	reported	WVwV6m	90274831	2	TRUE	NA	NA	0.00334986	10894	3e-06	80610	TRUE
432	rs116928468	A	G	A	G	-0.2566	0.0461	0.019	0.0169	FALSE	FALSE	FALSE	ebi-a-GCST005647	17	75178814	0.0752	80610	0.540201	Amyotrophic lateral sclerosis || id:ebi-a-GCST005647	Amyotrophic lateral sclerosis	Amyotrophic lateral sclerosis || ||	TRUE	igd	NA	NA	NA	NA	NA	NA	NA	90274831	1052	0.0536	1.69e-06	11770	90274831	TRUE	reported	WVwV6m	90274831	2	TRUE	NA	NA	0.00194373	11770	4.66e-06	80610	TRUE
433	rs117867445	C	G	C	G	0.2926	-0.0303	0.0172	0.0121	FALSE	TRUE	FALSE	ebi-a-GCST005647	9	137876508	0.1128	80610	0.788	Amyotrophic lateral sclerosis || id:ebi-a-GCST005647	Amyotrophic lateral sclerosis	Amyotrophic lateral sclerosis || ||	TRUE	igd	NA	NA	NA	NA	NA	NA	NA	90274831	396	0.0621	2.46e-06	10471	90274831	TRUE	reported	WVwV6m	90274831	2	TRUE	NA	NA	0.00211612	10471	8.95e-07	80610	TRUE
434	rs2285179	A	G	A	G	-0.0663	0.0062	0.5586	0.5357	FALSE	FALSE	FALSE	ebi-a-GCST005647	22	38211954	0.0138	80610	0.6519	Amyotrophic lateral sclerosis || id:ebi-a-GCST005647	Amyotrophic lateral sclerosis	Amyotrophic lateral sclerosis || ||	TRUE	igd	NA	NA	NA	NA	NA	NA	NA	90274831	1122	0.0122	5.5e-08	14288	90274831	TRUE	reported	WVwV6m	90274831	2	TRUE	NA	NA	0.002063	14288	2.5e-06	80610	TRUE
435	rs2511241	T	C	T	C	0.177	-0.0114	0.9163	0.9169	FALSE	FALSE	FALSE	ebi-a-GCST005647	11	72945341	0.028	80610	0.684101	Amyotrophic lateral sclerosis || id:ebi-a-GCST005647	Amyotrophic lateral sclerosis	Amyotrophic lateral sclerosis || ||	TRUE	igd	NA	NA	NA	NA	NA	NA	NA	90274831	444	0.0236	6.38e-14	13668	90274831	TRUE	reported	WVwV6m	90274831	2	TRUE	NA	NA	0.00409918	13668	2.06e-06	80610	TRUE
436	rs28444486	A	G	A	G	0.0636	-0.0018	0.7378	0.7365	FALSE	FALSE	FALSE	ebi-a-GCST005647	22	49231540	0.0157	80610	0.9087	Amyotrophic lateral sclerosis || id:ebi-a-GCST005647	Amyotrophic lateral sclerosis	Amyotrophic lateral sclerosis || ||	TRUE	igd	NA	NA	NA	NA	NA	NA	NA	90274831	1198	0.0136	2.92e-06	14735	90274831	TRUE	reported	WVwV6m	90274831	2	TRUE	NA	NA	0.00148218	14735	1.63e-07	80610	TRUE
437	rs370767	C	G	C	G	0.06	0.0363	0.4697	0.4619	FALSE	TRUE	TRUE	ebi-a-GCST005647	22	23239868	0.0163	80610	0.0259902	Amyotrophic lateral sclerosis || id:ebi-a-GCST005647	Amyotrophic lateral sclerosis	Amyotrophic lateral sclerosis || ||	TRUE	igd	NA	NA	NA	NA	NA	NA	NA	90274831	1055	0.0131	4.65e-06	13224	90274831	TRUE	reported	WVwV6m	90274831	2	FALSE	NA	NA	0.00158407	13224	6.15e-05	80610	TRUE
438	rs3859189	A	G	A	G	0.1101	-0.0041	0.5367	0.5084	FALSE	FALSE	FALSE	ebi-a-GCST005647	17	38137033	0.0137	80610	0.762901	Amyotrophic lateral sclerosis || id:ebi-a-GCST005647	Amyotrophic lateral sclerosis	Amyotrophic lateral sclerosis || ||	TRUE	igd	NA	NA	NA	NA	NA	NA	NA	90274831	881	0.0117	4.95e-21	14729	90274831	TRUE	reported	WVwV6m	90274831	2	TRUE	NA	NA	0.00597703	14729	1.11e-06	80610	TRUE
439	rs4779338	A	G	A	G	0.1274	0.0877	0.211	0.2136	FALSE	FALSE	FALSE	ebi-a-GCST005647	15	22508018	0.0334	80610	0.00864609	Amyotrophic lateral sclerosis || id:ebi-a-GCST005647	Amyotrophic lateral sclerosis	Amyotrophic lateral sclerosis || ||	TRUE	igd	NA	NA	NA	NA	NA	NA	NA	90274831	699	0.0276	3.91e-06	8491	90274831	TRUE	reported	WVwV6m	90274831	2	TRUE	NA	NA	0.00250366	8491	8.55e-05	80610	TRUE
440	rs4823082	C	G	C	G	-0.159	0.0485	0.0363	0.0249	FALSE	TRUE	FALSE	ebi-a-GCST005647	22	30600105	0.0446	80610	0.2762	Amyotrophic lateral sclerosis || id:ebi-a-GCST005647	Amyotrophic lateral sclerosis	Amyotrophic lateral sclerosis || ||	TRUE	igd	NA	NA	NA	NA	NA	NA	NA	90274831	1056	0.0346	4.32e-06	14724	90274831	TRUE	reported	WVwV6m	90274831	2	TRUE	NA	NA	0.00143236	14724	1.47e-05	80610	TRUE
441	rs559651	T	C	T	C	-0.0594	-0.0298	0.6496	0.649	FALSE	FALSE	FALSE	ebi-a-GCST005647	8	41555366	0.0145	80610	0.0396096	Amyotrophic lateral sclerosis || id:ebi-a-GCST005647	Amyotrophic lateral sclerosis	Amyotrophic lateral sclerosis || ||	TRUE	igd	NA	NA	NA	NA	NA	NA	NA	90274831	392	0.0125	2.01e-06	14715	90274831	TRUE	reported	WVwV6m	90274831	2	TRUE	NA	NA	0.00153245	14715	5.24e-05	80610	TRUE
442	rs61897429	A	G	A	G	-0.0847	0.0247	0.139	0.142	FALSE	FALSE	FALSE	ebi-a-GCST005647	11	47424864	0.0194	80610	0.2032	Amyotrophic lateral sclerosis || id:ebi-a-GCST005647	Amyotrophic lateral sclerosis	Amyotrophic lateral sclerosis || ||	TRUE	igd	NA	NA	NA	NA	NA	NA	NA	90274831	415	0.017	6.28e-07	14735	90274831	TRUE	reported	WVwV6m	90274831	2	TRUE	NA	NA	0.00168208	14735	2.01e-05	80610	TRUE
443	rs653178	T	C	T	C	-0.0728	0.0477	0.5224	0.5146	FALSE	FALSE	FALSE	ebi-a-GCST005647	12	112007756	0.0137	80610	0.0005175	Amyotrophic lateral sclerosis || id:ebi-a-GCST005647	Amyotrophic lateral sclerosis	Amyotrophic lateral sclerosis || ||	TRUE	igd	NA	NA	NA	NA	NA	NA	NA	90274831	457	0.0132	3.48e-08	11785	90274831	TRUE	reported	WVwV6m	90274831	2	TRUE	NA	NA	0.00257478	11785	0.000150367	80610	TRUE
444	rs7102957	T	C	T	C	-0.0803	0.0265	0.8631	0.8591	FALSE	FALSE	FALSE	ebi-a-GCST005647	11	102334152	0.02	80610	0.1838	Amyotrophic lateral sclerosis || id:ebi-a-GCST005647	Amyotrophic lateral sclerosis	Amyotrophic lateral sclerosis || ||	TRUE	igd	NA	NA	NA	NA	NA	NA	NA	90274831	447	0.0173	3.46e-06	14288	90274831	TRUE	reported	WVwV6m	90274831	2	TRUE	NA	NA	0.00150582	14288	2.18e-05	80610	TRUE
445	rs7432752	A	G	A	G	0.0882	0.0195	0.5176	0.5284	FALSE	FALSE	FALSE	ebi-a-GCST005647	3	155531845	0.0333	80610	0.558399	Amyotrophic lateral sclerosis || id:ebi-a-GCST005647	Amyotrophic lateral sclerosis	Amyotrophic lateral sclerosis || ||	TRUE	igd	NA	NA	NA	NA	NA	NA	NA	90274831	2	0.0167	1.28e-07	10894	90274831	TRUE	reported	WVwV6m	90274831	2	TRUE	NA	NA	0.00255438	10894	4.25e-06	80610	TRUE
446	rs74472890	T	C	T	C	-0.1426	-0.0337	0.9471	0.9533	FALSE	FALSE	FALSE	ebi-a-GCST005647	11	72946279	0.0412	80610	0.4137	Amyotrophic lateral sclerosis || id:ebi-a-GCST005647	Amyotrophic lateral sclerosis	Amyotrophic lateral sclerosis || ||	TRUE	igd	NA	NA	NA	NA	NA	NA	NA	90274831	446	0.0281	3.88e-07	14735	90274831	TRUE	reported	WVwV6m	90274831	2	TRUE	NA	NA	0.00174493	14735	8.3e-06	80610	TRUE
447	rs80303768	A	G	A	G	-0.152	-0.0393	0.0371	0.0412	FALSE	FALSE	FALSE	ebi-a-GCST005647	21	42594678	0.0377	80610	0.2966	Amyotrophic lateral sclerosis || id:ebi-a-GCST005647	Amyotrophic lateral sclerosis	Amyotrophic lateral sclerosis || ||	TRUE	igd	NA	NA	NA	NA	NA	NA	NA	90274831	1054	0.0327	3.35e-06	14722	90274831	TRUE	reported	WVwV6m	90274831	2	TRUE	NA	NA	0.00146571	14722	1.35e-05	80610	TRUE
448	rs9264931	T	C	T	C	-0.1048	-0.0124	0.8812	0.8746	FALSE	FALSE	FALSE	ebi-a-GCST005647	6	31274196	0.0209	80610	0.551099	Amyotrophic lateral sclerosis || id:ebi-a-GCST005647	Amyotrophic lateral sclerosis	Amyotrophic lateral sclerosis || ||	TRUE	igd	NA	NA	NA	NA	NA	NA	NA	90274831	258	0.0191	4.09e-08	14736	90274831	TRUE	reported	WVwV6m	90274831	2	TRUE	NA	NA	0.00203915	14736	4.37e-06	80610	TRUE
449	rs10901252	C	G	C	G	0.2068	-0.0635	0.0963	0.077	FALSE	TRUE	FALSE	ebi-a-GCST005647	9	136128000	0.0262	80610	0.0152598	Amyotrophic lateral sclerosis || id:ebi-a-GCST005647	Amyotrophic lateral sclerosis	Amyotrophic lateral sclerosis || ||	TRUE	igd	NA	NA	NA	NA	NA	NA	NA	90274820	224	0.0213	2.76e-22	11779	90274820	TRUE	reported	ZZdRDI	90274820	2	TRUE	NA	NA	0.00794045	11779	7.29e-05	80610	TRUE
450	rs113103566	A	T	A	T	-0.0969	0.0654	0.5216	0.5388	FALSE	TRUE	TRUE	ebi-a-GCST005647	9	136249522	0.0322	80610	0.0421803	Amyotrophic lateral sclerosis || id:ebi-a-GCST005647	Amyotrophic lateral sclerosis	Amyotrophic lateral sclerosis || ||	TRUE	igd	NA	NA	NA	NA	NA	NA	NA	90274820	468	0.0201	1.43e-06	6878	90274820	TRUE	reported	ZZdRDI	90274820	2	FALSE	NA	NA	0.00336864	6878	5.12e-05	80610	TRUE
451	rs115938660	T	C	T	C	-0.2181	0.0124	0.0215	0.0192	FALSE	FALSE	FALSE	ebi-a-GCST005647	5	110784241	0.0607	80610	0.8385	Amyotrophic lateral sclerosis || id:ebi-a-GCST005647	Amyotrophic lateral sclerosis	Amyotrophic lateral sclerosis || ||	TRUE	igd	NA	NA	NA	NA	NA	NA	NA	90274820	62	0.0467	3.01e-06	11770	90274820	TRUE	reported	ZZdRDI	90274820	2	TRUE	NA	NA	0.00185	11770	5.18e-07	80610	TRUE
452	rs117117000	A	G	A	G	0.1586	-0.0346	0.961	0.9648	FALSE	FALSE	FALSE	ebi-a-GCST005647	8	119917062	0.0472	80610	0.4631	Amyotrophic lateral sclerosis || id:ebi-a-GCST005647	Amyotrophic lateral sclerosis	Amyotrophic lateral sclerosis || ||	TRUE	igd	NA	NA	NA	NA	NA	NA	NA	90274820	69	0.0333	1.91e-06	11784	90274820	TRUE	reported	ZZdRDI	90274820	2	TRUE	NA	NA	0.0019216	11784	6.67e-06	80610	TRUE
453	rs12754806	A	G	A	G	0.0563	-0.0185	0.4817	0.4783	FALSE	FALSE	FALSE	ebi-a-GCST005647	1	238821453	0.0136	80610	0.1741	Amyotrophic lateral sclerosis || id:ebi-a-GCST005647	Amyotrophic lateral sclerosis	Amyotrophic lateral sclerosis || ||	TRUE	igd	NA	NA	NA	NA	NA	NA	NA	90274820	2	0.0122	3.94e-06	11768	90274820	TRUE	reported	ZZdRDI	90274820	2	TRUE	NA	NA	0.00180669	11768	2.3e-05	80610	TRUE
454	rs141933232	A	G	A	G	-0.2724	-0.0576	0.0169	0.0218	FALSE	FALSE	FALSE	ebi-a-GCST005647	17	36964094	0.0525	80610	0.2726	Amyotrophic lateral sclerosis || id:ebi-a-GCST005647	Amyotrophic lateral sclerosis	Amyotrophic lateral sclerosis || ||	TRUE	igd	NA	NA	NA	NA	NA	NA	NA	90274820	647	0.0546	6.07e-07	11724	90274820	TRUE	reported	ZZdRDI	90274820	2	TRUE	NA	NA	0.00211888	11724	1.49e-05	80610	TRUE
455	rs147006060	A	G	A	G	-0.2602	-0.1966	0.0179	0.0113	FALSE	FALSE	FALSE	ebi-a-GCST005647	21	43780807	0.1388	80610	0.1566	Amyotrophic lateral sclerosis || id:ebi-a-GCST005647	Amyotrophic lateral sclerosis	Amyotrophic lateral sclerosis || ||	TRUE	igd	NA	NA	NA	NA	NA	NA	NA	90274820	662	0.0566	4.28e-06	11775	90274820	TRUE	reported	ZZdRDI	90274820	2	TRUE	NA	NA	0.00179191	11775	2.49e-05	80610	TRUE
456	rs1690678	A	C	A	C	0.0904	-0.0268	0.1109	0.1184	FALSE	FALSE	FALSE	ebi-a-GCST005647	10	27930818	0.0213	80610	0.2075	Amyotrophic lateral sclerosis || id:ebi-a-GCST005647	Amyotrophic lateral sclerosis	Amyotrophic lateral sclerosis || ||	TRUE	igd	NA	NA	NA	NA	NA	NA	NA	90274820	596	0.0192	2.5e-06	11784	90274820	TRUE	reported	ZZdRDI	90274820	2	TRUE	NA	NA	0.00187802	11784	1.96e-05	80610	TRUE
457	rs2289779	T	G	T	G	0.0788	-0.0017	0.5419	0.5425	FALSE	FALSE	FALSE	ebi-a-GCST005647	5	38527228	0.0142	80610	0.9063	Amyotrophic lateral sclerosis || id:ebi-a-GCST005647	Amyotrophic lateral sclerosis	Amyotrophic lateral sclerosis || ||	TRUE	igd	NA	NA	NA	NA	NA	NA	NA	90274820	54	0.0134	4.09e-09	11336	90274820	TRUE	reported	ZZdRDI	90274820	2	TRUE	NA	NA	0.00304184	11336	1.78e-07	80610	TRUE
458	rs3963364	A	C	A	C	-0.0951	-0.0096	0.1784	0.2166	FALSE	FALSE	FALSE	ebi-a-GCST005647	3	12385357	0.0183	80610	0.598199	Amyotrophic lateral sclerosis || id:ebi-a-GCST005647	Amyotrophic lateral sclerosis	Amyotrophic lateral sclerosis || ||	TRUE	igd	NA	NA	NA	NA	NA	NA	NA	90274820	5	0.0203	2.8e-06	9453	90274820	TRUE	reported	ZZdRDI	90274820	2	TRUE	NA	NA	0.00231678	9453	3.41e-06	80610	TRUE
459	rs4937122	T	G	T	G	0.1262	0.0461	0.9129	0.921	FALSE	FALSE	FALSE	ebi-a-GCST005647	11	126228659	0.0258	80610	0.0743807	Amyotrophic lateral sclerosis || id:ebi-a-GCST005647	Amyotrophic lateral sclerosis	Amyotrophic lateral sclerosis || ||	TRUE	igd	NA	NA	NA	NA	NA	NA	NA	90274820	615	0.0248	3.61e-07	11336	90274820	TRUE	reported	ZZdRDI	90274820	2	TRUE	NA	NA	0.00227951	11336	3.96e-05	80610	TRUE
460	rs6002001	A	G	A	G	0.6489	-0.0117	0.0043	0.0169	FALSE	FALSE	FALSE	ebi-a-GCST005647	22	41060625	0.1439	80610	0.935	Amyotrophic lateral sclerosis || id:ebi-a-GCST005647	Amyotrophic lateral sclerosis	Amyotrophic lateral sclerosis || ||	TRUE	igd	TRUE	rs6002001	rs6002005	A	G	G	T	90274820	663	0.1417	4.66e-06	6861	90274820	TRUE	reported	ZZdRDI	90274820	2	TRUE	NA	NA	0.0030481	6861	8.2e-08	80610	TRUE
461	rs62258077	T	C	T	C	-0.063	-0.0037	0.6603	0.6194	FALSE	FALSE	FALSE	ebi-a-GCST005647	3	58363371	0.0139	80610	0.793	Amyotrophic lateral sclerosis || id:ebi-a-GCST005647	Amyotrophic lateral sclerosis	Amyotrophic lateral sclerosis || ||	TRUE	igd	NA	NA	NA	NA	NA	NA	NA	90274820	24	0.013	1.26e-06	11762	90274820	TRUE	reported	ZZdRDI	90274820	2	TRUE	NA	NA	0.00199306	11762	8.79e-07	80610	TRUE
462	rs72730728	A	T	A	T	0.1414	-0.0427	0.9403	0.9452	FALSE	TRUE	FALSE	ebi-a-GCST005647	5	36424241	0.0346	80610	0.2181	Amyotrophic lateral sclerosis || id:ebi-a-GCST005647	Amyotrophic lateral sclerosis	Amyotrophic lateral sclerosis || ||	TRUE	igd	NA	NA	NA	NA	NA	NA	NA	90274820	34	0.0302	2.84e-06	11336	90274820	TRUE	reported	ZZdRDI	90274820	2	TRUE	NA	NA	0.00193047	11336	1.89e-05	80610	TRUE
463	rs72837682	T	C	T	C	-0.08	-0.011	0.7807	0.7969	FALSE	FALSE	FALSE	ebi-a-GCST005647	17	7063650	0.0195	80610	0.5726	Amyotrophic lateral sclerosis || id:ebi-a-GCST005647	Amyotrophic lateral sclerosis	Amyotrophic lateral sclerosis || ||	TRUE	igd	NA	NA	NA	NA	NA	NA	NA	90274820	633	0.0172	3.3e-06	11336	90274820	TRUE	reported	ZZdRDI	90274820	2	TRUE	NA	NA	0.00190507	11336	3.95e-06	80610	TRUE
464	rs73157388	T	C	T	C	-0.1306	0.0239	0.9229	0.9406	FALSE	FALSE	FALSE	ebi-a-GCST005647	7	79349730	0.0344	80610	0.488599	Amyotrophic lateral sclerosis || id:ebi-a-GCST005647	Amyotrophic lateral sclerosis	Amyotrophic lateral sclerosis || ||	TRUE	igd	NA	NA	NA	NA	NA	NA	NA	90274820	65	0.0285	4.6e-06	11336	90274820	TRUE	reported	ZZdRDI	90274820	2	TRUE	NA	NA	0.00184931	11336	5.99e-06	80610	TRUE
465	rs778016	A	G	A	G	-0.0681	-0.0104	0.2875	0.2721	FALSE	FALSE	FALSE	ebi-a-GCST005647	6	68918580	0.0158	80610	0.510199	Amyotrophic lateral sclerosis || id:ebi-a-GCST005647	Amyotrophic lateral sclerosis	Amyotrophic lateral sclerosis || ||	TRUE	igd	NA	NA	NA	NA	NA	NA	NA	90274820	64	0.0145	2.65e-06	9883	90274820	TRUE	reported	ZZdRDI	90274820	2	TRUE	NA	NA	0.00222735	9883	5.37e-06	80610	TRUE
466	rs9313148	C	G	C	G	-0.0824	-0.0159	0.1414	0.1439	FALSE	TRUE	FALSE	ebi-a-GCST005647	5	6378192	0.0196	80610	0.4157	Amyotrophic lateral sclerosis || id:ebi-a-GCST005647	Amyotrophic lateral sclerosis	Amyotrophic lateral sclerosis || ||	TRUE	igd	NA	NA	NA	NA	NA	NA	NA	90274820	32	0.0173	1.91e-06	11777	90274820	TRUE	reported	ZZdRDI	90274820	2	TRUE	NA	NA	0.00192294	11777	8.16e-06	80610	TRUE
[truncated: 2 more columns]

## Sheet: S9
SNP details for the reverse Mendelian randomization validation group
	SNP	effect_allele.exposure	other_allele.exposure	effect_allele.outcome	other_allele.outcome	beta.exposure	beta.outcome	eaf.exposure	eaf.outcome	remove	palindromic	ambiguous	id.outcome	se.outcome	pval.outcome	samplesize.outcome	outcome	mr_keep.outcome	pval_origin.outcome	data_source.outcome	pos.exposure	pval.exposure	se.exposure	chr.exposure	samplesize.exposure	id.exposure	exposure	mr_keep.exposure	pval_origin.exposure	data_source.exposure	action	mr_keep	units.outcome	units.exposure	rsq.exposure	effective_n.exposure	rsq.outcome	effective_n.outcome	steiger_dir	steiger_pval	F(beta2/se2)
1	rs117204439	C	T	C	T	0.4248	0.0323	NA	NA	FALSE	FALSE	FALSE	HQOwSj	0.0611	0.597	12305	90274759	TRUE	reported	textfile	27607973	3.08198e-10	0.0675	9	36052	ebi-a-GCST004692	|| id:ebi-a-GCST004692	TRUE	reported	igd	1	TRUE	NA	NA	0.00109744	36052	2.27144e-05	12305	TRUE	0.00658043	39.606
2	rs35714695	A	G	A	G	-0.1344	0.0338	NA	NA	FALSE	FALSE	FALSE	HQOwSj	0.0154	0.0282	14733	90274759	TRUE	reported	textfile	26719788	1.286e-08	0.0236	17	36052	ebi-a-GCST004692	|| id:ebi-a-GCST004692	TRUE	reported	igd	1	TRUE	NA	NA	0.000898832	36052	0.000326902	14733	TRUE	0.223368	32.4321
3	rs3849943	T	C	T	C	-0.1808	0.0258	NA	NA	FALSE	FALSE	FALSE	HQOwSj	0.0135	0.056	14736	90274759	TRUE	reported	textfile	27543382	3.98474e-19	0.0202	9	36052	ebi-a-GCST004692	|| id:ebi-a-GCST004692	TRUE	reported	igd	1	TRUE	NA	NA	0.0022173	36052	0.000247824	14736	TRUE	0.00133158	80.1114
4	rs75087725	A	C	A	C	0.4787	0.0003	NA	NA	FALSE	FALSE	FALSE	HQOwSj	0.062	0.996	11755	90274759	TRUE	reported	textfile	45753117	8.65366e-11	0.0738	21	36052	ebi-a-GCST004692	|| id:ebi-a-GCST004692	TRUE	reported	igd	1	TRUE	NA	NA	0.00116574	36052	1.9921e-09	11755	TRUE	0.00132118	42.074
5	rs78549703	A	G	A	G	0.1095	0.0304	NA	NA	FALSE	FALSE	FALSE	HQOwSj	0.0131	0.0203	14287	90274759	TRUE	reported	textfile	17749542	1.305e-08	0.0193	19	36052	ebi-a-GCST004692	|| id:ebi-a-GCST004692	TRUE	reported	igd	1	TRUE	NA	NA	0.000892115	36052	0.000376843	14287	TRUE	0.28996	32.1895
6	rs10463311	T	C	T	C	-0.0854	-0.0052	0.7441	NA	FALSE	FALSE	FALSE	HQOwSj	0.0131	0.691	14731	90274759	TRUE	reported	textfile	150410835	3.99899e-08	0.0156	5	80610	ebi-a-GCST005647	|| id:ebi-a-GCST005647	TRUE	reported	igd	1	TRUE	NA	NA	0.000371644	80610	1.06976e-05	14731	TRUE	0.0740097	29.9686
7	rs117204439	C	T	C	T	0.4645	0.0323	0.0238	NA	FALSE	FALSE	FALSE	HQOwSj	0.0611	0.597	12305	90274759	TRUE	reported	textfile	27607973	3.08319e-14	0.0612	9	80610	ebi-a-GCST005647	|| id:ebi-a-GCST005647	TRUE	reported	igd	1	TRUE	NA	NA	0.000714135	80610	2.27144e-05	12305	TRUE	0.0232634	57.6061
8	rs12973192	G	C	G	C	0.1205	0.0282	0.3247	NA	FALSE	TRUE	TRUE	HQOwSj	0.013	0.0301	14288	90274759	TRUE	reported	textfile	17753239	3.91562e-15	0.0153	19	80610	ebi-a-GCST005647	|| id:ebi-a-GCST005647	TRUE	reported	igd	1	TRUE	NA	NA	0.000768916	80610	0.000329274	14288	TRUE	0.290857	62.0285
9	rs142321490	C	G	C	G	0.3172	-0.0221	0.0183	NA	FALSE	TRUE	TRUE	HQOwSj	0.048	0.645	12851	90274759	TRUE	reported	textfile	58676132	6.14695e-10	0.0513	12	80610	ebi-a-GCST005647	|| id:ebi-a-GCST005647	TRUE	reported	igd	1	TRUE	NA	NA	0.000474076	80610	1.64978e-05	12851	TRUE	0.0622031	38.2324
10	rs3849943	T	C	T	C	-0.1764	0.0258	0.7518	NA	FALSE	FALSE	FALSE	HQOwSj	0.0135	0.056	14736	90274759	TRUE	reported	textfile	27543382	3.76964e-30	0.0155	9	80610	ebi-a-GCST005647	|| id:ebi-a-GCST005647	TRUE	reported	igd	1	TRUE	NA	NA	0.0016042	80610	0.000247824	14736	TRUE	0.00661887	129.519
11	rs74654358	A	G	A	G	0.1976	0.0344	0.0473	NA	FALSE	FALSE	FALSE	HQOwSj	0.0269	0.201	14729	90274759	TRUE	reported	textfile	64881967	4.65801e-09	0.0337	12	80610	ebi-a-GCST005647	|| id:ebi-a-GCST005647	TRUE	reported	igd	1	TRUE	NA	NA	0.000426335	80610	0.000111032	14729	TRUE	0.259114	34.3806
12	rs75087725	A	C	A	C	0.5145	0.0003	0.0153	NA	FALSE	FALSE	FALSE	HQOwSj	0.062	0.996	11755	90274759	TRUE	reported	textfile	45753117	1.84799e-14	0.0672	21	80610	ebi-a-GCST005647	|| id:ebi-a-GCST005647	TRUE	reported	igd	1	TRUE	NA	NA	0.000726672	80610	1.9921e-09	11755	TRUE	0.00640683	58.6182
13	rs117204439	C	T	C	T	0.4248	0.0086	NA	NA	FALSE	FALSE	FALSE	HdqH9O	0.0608	0.888	12305	90274766	TRUE	reported	textfile	27607973	3.08198e-10	0.0675	9	36052	ebi-a-GCST004692	|| id:ebi-a-GCST004692	TRUE	reported	igd	1	TRUE	NA	NA	0.00109744	36052	1.62622e-06	12305	TRUE	0.00227567	39.606
14	rs35714695	A	G	A	G	-0.1344	-0.0223	NA	NA	FALSE	FALSE	FALSE	HdqH9O	0.0158	0.158	14733	90274766	TRUE	reported	textfile	26719788	1.286e-08	0.0236	17	36052	ebi-a-GCST004692	|| id:ebi-a-GCST004692	TRUE	reported	igd	1	TRUE	NA	NA	0.000898832	36052	0.000135209	14733	TRUE	0.0604354	32.4321
15	rs3849943	T	C	T	C	-0.1808	-0.0199	NA	NA	FALSE	FALSE	FALSE	HdqH9O	0.0138	0.149	14736	90274766	TRUE	reported	textfile	27543382	3.98474e-19	0.0202	9	36052	ebi-a-GCST004692	|| id:ebi-a-GCST004692	TRUE	reported	igd	1	TRUE	NA	NA	0.0022173	36052	0.000141113	14736	TRUE	0.000313049	80.1114
16	rs75087725	A	C	A	C	0.4787	0.0606	NA	NA	FALSE	FALSE	FALSE	HdqH9O	0.0619	0.328	11755	90274766	TRUE	reported	textfile	45753117	8.65366e-11	0.0738	21	36052	ebi-a-GCST004692	|| id:ebi-a-GCST004692	TRUE	reported	igd	1	TRUE	NA	NA	0.00116574	36052	8.15417e-05	11755	TRUE	0.0180101	42.074
17	rs78549703	A	G	A	G	0.1095	-0.0088	NA	NA	FALSE	FALSE	FALSE	HdqH9O	0.0131	0.502	14287	90274766	TRUE	reported	textfile	17749542	1.305e-08	0.0193	19	36052	ebi-a-GCST004692	|| id:ebi-a-GCST004692	TRUE	reported	igd	1	TRUE	NA	NA	0.000892115	36052	3.15885e-05	14287	TRUE	0.0141492	32.1895
18	rs10463311	T	C	T	C	-0.0854	-0.0319	0.7441	NA	FALSE	FALSE	FALSE	HdqH9O	0.0133	0.0165	14731	90274766	TRUE	reported	textfile	150410835	3.99899e-08	0.0156	5	80610	ebi-a-GCST005647	|| id:ebi-a-GCST005647	TRUE	reported	igd	1	TRUE	NA	NA	0.000371644	80610	0.000390423	14731	FALSE	0.957173	29.9686
19	rs117204439	C	T	C	T	0.4645	0.0086	0.0238	NA	FALSE	FALSE	FALSE	HdqH9O	0.0608	0.888	12305	90274766	TRUE	reported	textfile	27607973	3.08319e-14	0.0612	9	80610	ebi-a-GCST005647	|| id:ebi-a-GCST005647	TRUE	reported	igd	1	TRUE	NA	NA	0.000714135	80610	1.62622e-06	12305	TRUE	0.00854564	57.6061
20	rs12973192	G	C	G	C	0.1205	-0.0107	0.3247	NA	FALSE	TRUE	TRUE	HdqH9O	0.0129	0.407	14288	90274766	TRUE	reported	textfile	17753239	3.91562e-15	0.0153	19	80610	ebi-a-GCST005647	|| id:ebi-a-GCST005647	TRUE	reported	igd	1	TRUE	NA	NA	0.000768916	80610	4.81567e-05	14288	TRUE	0.0219683	62.0285
21	rs142321490	C	G	C	G	0.3172	0.0276	0.0183	NA	FALSE	TRUE	TRUE	HdqH9O	0.0495	0.577	12851	90274766	TRUE	reported	textfile	58676132	6.14695e-10	0.0513	12	80610	ebi-a-GCST005647	|| id:ebi-a-GCST005647	TRUE	reported	igd	1	TRUE	NA	NA	0.000474076	80610	2.41951e-05	12851	TRUE	0.0759613	38.2324
22	rs3849943	T	C	T	C	-0.1764	-0.0199	0.7518	NA	FALSE	FALSE	FALSE	HdqH9O	0.0138	0.149	14736	90274766	TRUE	reported	textfile	27543382	3.76964e-30	0.0155	9	80610	ebi-a-GCST005647	|| id:ebi-a-GCST005647	TRUE	reported	igd	1	TRUE	NA	NA	0.0016042	80610	0.000141113	14736	TRUE	0.00165126	129.519
23	rs74654358	A	G	A	G	0.1976	0.0345	0.0473	NA	FALSE	FALSE	FALSE	HdqH9O	0.0275	0.21	14729	90274766	TRUE	reported	textfile	64881967	4.65801e-09	0.0337	12	80610	ebi-a-GCST005647	|| id:ebi-a-GCST005647	TRUE	reported	igd	1	TRUE	NA	NA	0.000426335	80610	0.000106859	14729	TRUE	0.249815	34.3806
24	rs75087725	A	C	A	C	0.5145	0.0606	0.0153	NA	FALSE	FALSE	FALSE	HdqH9O	0.0619	0.328	11755	90274766	TRUE	reported	textfile	45753117	1.84799e-14	0.0672	21	80610	ebi-a-GCST005647	|| id:ebi-a-GCST005647	TRUE	reported	igd	1	TRUE	NA	NA	0.000726672	80610	8.15417e-05	11755	TRUE	0.0693434	58.6182
25	rs117204439	C	T	C	T	0.4248	-0.0011	NA	NA	FALSE	FALSE	FALSE	NyJW4p	0.0602	0.985	12313	90274795	TRUE	reported	textfile	27607973	3.08198e-10	0.0675	9	36052	ebi-a-GCST004692	|| id:ebi-a-GCST004692	TRUE	reported	igd	1	TRUE	NA	NA	0.00109744	36052	2.71206e-08	12313	TRUE	0.00158421	39.606
26	rs35714695	A	G	A	G	-0.1344	0.0036	NA	NA	FALSE	FALSE	FALSE	NyJW4p	0.0157	0.819	14741	90274795	TRUE	reported	textfile	26719788	1.286e-08	0.0236	17	36052	ebi-a-GCST004692	|| id:ebi-a-GCST004692	TRUE	reported	igd	1	TRUE	NA	NA	0.000898832	36052	3.56727e-06	14741	TRUE	0.00405127	32.4321
27	rs3849943	T	C	T	C	-0.1808	-0.0043	NA	NA	FALSE	FALSE	FALSE	NyJW4p	0.0138	0.755	14744	90274795	TRUE	reported	textfile	27543382	3.98474e-19	0.0202	9	36052	ebi-a-GCST004692	|| id:ebi-a-GCST004692	TRUE	reported	igd	1	TRUE	NA	NA	0.0022173	36052	6.58597e-06	14744	TRUE	5.17455e-06	80.1114
28	rs75087725	A	C	A	C	0.4787	-0.0117	NA	NA	FALSE	FALSE	FALSE	NyJW4p	0.0623	0.851	11763	90274795	TRUE	reported	textfile	45753117	8.65366e-11	0.0738	21	36052	ebi-a-GCST004692	|| id:ebi-a-GCST004692	TRUE	reported	igd	1	TRUE	NA	NA	0.00116574	36052	2.99882e-06	11763	TRUE	0.00226342	42.074
29	rs78549703	A	G	A	G	0.1095	0.0125	NA	NA	FALSE	FALSE	FALSE	NyJW4p	0.0131	0.34	14295	90274795	TRUE	reported	textfile	17749542	1.305e-08	0.0193	19	36052	ebi-a-GCST004692	|| id:ebi-a-GCST004692	TRUE	reported	igd	1	TRUE	NA	NA	0.000892115	36052	6.36981e-05	14295	TRUE	0.0267526	32.1895
30	rs10463311	T	C	T	C	-0.0854	-0.0168	0.7441	NA	FALSE	FALSE	FALSE	NyJW4p	0.0133	0.207	14739	90274795	TRUE	reported	textfile	150410835	3.99899e-08	0.0156	5	80610	ebi-a-GCST005647	|| id:ebi-a-GCST005647	TRUE	reported	igd	1	TRUE	NA	NA	0.000371644	80610	0.000108258	14739	TRUE	0.321858	29.9686
31	rs117204439	C	T	C	T	0.4645	-0.0011	0.0238	NA	FALSE	FALSE	FALSE	NyJW4p	0.0602	0.985	12313	90274795	TRUE	reported	textfile	27607973	3.08319e-14	0.0612	9	80610	ebi-a-GCST005647	|| id:ebi-a-GCST005647	TRUE	reported	igd	1	TRUE	NA	NA	0.000714135	80610	2.71206e-08	12313	TRUE	0.00604701	57.6061
32	rs12973192	G	C	G	C	0.1205	0.0132	0.3247	NA	FALSE	TRUE	TRUE	NyJW4p	0.013	0.31	14296	90274795	TRUE	reported	textfile	17753239	3.91562e-15	0.0153	19	80610	ebi-a-GCST005647	|| id:ebi-a-GCST005647	TRUE	reported	igd	1	TRUE	NA	NA	0.000768916	80610	7.21234e-05	14296	TRUE	0.0339782	62.0285
33	rs142321490	C	G	C	G	0.3172	-0.0331	0.0183	NA	FALSE	TRUE	TRUE	NyJW4p	0.0494	0.503	12859	90274795	TRUE	reported	textfile	58676132	6.14695e-10	0.0513	12	80610	ebi-a-GCST005647	|| id:ebi-a-GCST005647	TRUE	reported	igd	1	TRUE	NA	NA	0.000474076	80610	3.49178e-05	12859	TRUE	0.0947582	38.2324
34	rs3849943	T	C	T	C	-0.1764	-0.0043	0.7518	NA	FALSE	FALSE	FALSE	NyJW4p	0.0138	0.755	14744	90274795	TRUE	reported	textfile	27543382	3.76964e-30	0.0155	9	80610	ebi-a-GCST005647	|| id:ebi-a-GCST005647	TRUE	reported	igd	1	TRUE	NA	NA	0.0016042	80610	6.58597e-06	14744	TRUE	2.82544e-05	129.519
35	rs74654358	A	G	A	G	0.1976	0.0026	0.0473	NA	FALSE	FALSE	FALSE	NyJW4p	0.0274	0.924	14737	90274795	TRUE	reported	textfile	64881967	4.65801e-09	0.0337	12	80610	ebi-a-GCST005647	|| id:ebi-a-GCST005647	TRUE	reported	igd	1	TRUE	NA	NA	0.000426335	80610	6.11076e-07	14737	TRUE	0.0265815	34.3806
36	rs75087725	A	C	A	C	0.5145	-0.0117	0.0153	NA	FALSE	FALSE	FALSE	NyJW4p	0.0623	0.851	11763	90274795	TRUE	reported	textfile	45753117	1.84799e-14	0.0672	21	80610	ebi-a-GCST005647	|| id:ebi-a-GCST005647	TRUE	reported	igd	1	TRUE	NA	NA	0.000726672	80610	2.99882e-06	11763	TRUE	0.0105853	58.6182
37	rs117204439	C	T	C	T	0.4248	-0.0117	NA	NA	FALSE	FALSE	FALSE	5JHstA	0.0643	0.856	9362	90274802	TRUE	reported	textfile	27607973	3.08198e-10	0.0675	9	36052	ebi-a-GCST004692	|| id:ebi-a-GCST004692	TRUE	reported	igd	1	TRUE	NA	NA	0.00109744	36052	3.5373e-06	9362	TRUE	0.00705061	39.606
38	rs35714695	A	G	A	G	-0.1344	-0.0282	NA	NA	FALSE	FALSE	FALSE	5JHstA	0.0172	0.101	11790	90274802	TRUE	reported	textfile	26719788	1.286e-08	0.0236	17	36052	ebi-a-GCST004692	|| id:ebi-a-GCST004692	TRUE	reported	igd	1	TRUE	NA	NA	0.000898832	36052	0.000227983	11790	TRUE	0.160533	32.4321
39	rs3849943	T	C	T	C	-0.1808	-0.0041	NA	NA	FALSE	FALSE	FALSE	5JHstA	0.0152	0.787	11793	90274802	TRUE	reported	textfile	27543382	3.98474e-19	0.0202	9	36052	ebi-a-GCST004692	|| id:ebi-a-GCST004692	TRUE	reported	igd	1	TRUE	NA	NA	0.0022173	36052	6.1706e-06	11793	TRUE	2.58179e-05	80.1114
40	rs75087725	A	C	A	C	0.4787	-0.0498	NA	NA	FALSE	FALSE	FALSE	5JHstA	0.0704	0.479	8812	90274802	TRUE	reported	textfile	45753117	8.65366e-11	0.0738	21	36052	ebi-a-GCST004692	|| id:ebi-a-GCST004692	TRUE	reported	igd	1	TRUE	NA	NA	0.00116574	36052	5.67954e-05	8812	TRUE	0.0251086	42.074
41	rs78549703	A	G	A	G	0.1095	0.0099	NA	NA	FALSE	FALSE	FALSE	5JHstA	0.0145	0.495	11344	90274802	TRUE	reported	textfile	17749542	1.305e-08	0.0193	19	36052	ebi-a-GCST004692	|| id:ebi-a-GCST004692	TRUE	reported	igd	1	TRUE	NA	NA	0.000892115	36052	4.10986e-05	11344	TRUE	0.0292885	32.1895
42	rs10463311	T	C	T	C	-0.0854	-0.0079	0.7441	NA	FALSE	FALSE	FALSE	5JHstA	0.0148	0.593	11788	90274802	TRUE	reported	textfile	150410835	3.99899e-08	0.0156	5	80610	ebi-a-GCST005647	|| id:ebi-a-GCST005647	TRUE	reported	igd	1	TRUE	NA	NA	0.000371644	80610	2.41743e-05	11788	TRUE	0.145264	29.9686
43	rs117204439	C	T	C	T	0.4645	-0.0117	0.0238	NA	FALSE	FALSE	FALSE	5JHstA	0.0643	0.856	9362	90274802	TRUE	reported	textfile	27607973	3.08319e-14	0.0612	9	80610	ebi-a-GCST005647	|| id:ebi-a-GCST005647	TRUE	reported	igd	1	TRUE	NA	NA	0.000714135	80610	3.5373e-06	9362	TRUE	0.0228784	57.6061
44	rs12973192	G	C	G	C	0.1205	0.0151	0.3247	NA	FALSE	TRUE	TRUE	5JHstA	0.0144	0.294	11345	90274802	TRUE	reported	textfile	17753239	3.91562e-15	0.0153	19	80610	ebi-a-GCST005647	|| id:ebi-a-GCST005647	TRUE	reported	igd	1	TRUE	NA	NA	0.000768916	80610	9.69301e-05	11345	TRUE	0.0744283	62.0285
45	rs142321490	C	G	C	G	0.3172	-0.025	0.0183	NA	FALSE	TRUE	TRUE	5JHstA	0.0517	0.629	9908	90274802	TRUE	reported	textfile	58676132	6.14695e-10	0.0513	12	80610	ebi-a-GCST005647	|| id:ebi-a-GCST005647	TRUE	reported	igd	1	TRUE	NA	NA	0.000474076	80610	2.36043e-05	9908	TRUE	0.112067	38.2324
46	rs3849943	T	C	T	C	-0.1764	-0.0041	0.7518	NA	FALSE	FALSE	FALSE	5JHstA	0.0152	0.787	11793	90274802	TRUE	reported	textfile	27543382	3.76964e-30	0.0155	9	80610	ebi-a-GCST005647	|| id:ebi-a-GCST005647	TRUE	reported	igd	1	TRUE	NA	NA	0.0016042	80610	6.1706e-06	11793	TRUE	0.000137692	129.519
47	rs74654358	A	G	A	G	0.1976	-0.0122	0.0473	NA	FALSE	FALSE	FALSE	5JHstA	0.0294	0.678	11786	90274802	TRUE	reported	textfile	64881967	4.65801e-09	0.0337	12	80610	ebi-a-GCST005647	|| id:ebi-a-GCST005647	TRUE	reported	igd	1	TRUE	NA	NA	0.000426335	80610	1.46125e-05	11786	TRUE	0.0879647	34.3806
48	rs75087725	A	C	A	C	0.5145	-0.0498	0.0153	NA	FALSE	FALSE	FALSE	5JHstA	0.0704	0.479	8812	90274802	TRUE	reported	textfile	45753117	1.84799e-14	0.0672	21	80610	ebi-a-GCST005647	|| id:ebi-a-GCST005647	TRUE	reported	igd	1	TRUE	NA	NA	0.000726672	80610	5.67954e-05	8812	TRUE	0.0834161	58.6182
49	rs117204439	C	T	C	T	0.4248	-0.0931	NA	NA	FALSE	FALSE	FALSE	qUs7G3	0.0645	0.149	9361	90274814	TRUE	reported	textfile	27607973	3.08198e-10	0.0675	9	36052	ebi-a-GCST004692	|| id:ebi-a-GCST004692	TRUE	reported	igd	1	TRUE	NA	NA	0.00109744	36052	0.000222563	9361	TRUE	0.116309	39.606
50	rs35714695	A	G	A	G	-0.1344	-0.0332	NA	NA	FALSE	FALSE	FALSE	qUs7G3	0.0175	0.0578	11789	90274814	TRUE	reported	textfile	26719788	1.286e-08	0.0236	17	36052	ebi-a-GCST004692	|| id:ebi-a-GCST004692	TRUE	reported	igd	1	TRUE	NA	NA	0.000898832	36052	0.000305256	11789	TRUE	0.238166	32.4321
51	rs3849943	T	C	T	C	-0.1808	-0.0003	NA	NA	FALSE	FALSE	FALSE	qUs7G3	0.0154	0.984	11792	90274814	TRUE	reported	textfile	27543382	3.98474e-19	0.0202	9	36052	ebi-a-GCST004692	|| id:ebi-a-GCST004692	TRUE	reported	igd	1	TRUE	NA	NA	0.0022173	36052	3.21875e-08	11792	TRUE	9.66136e-06	80.1114
52	rs75087725	A	C	A	C	0.4787	-0.0064	NA	NA	FALSE	FALSE	FALSE	qUs7G3	0.0707	0.928	8812	90274814	TRUE	reported	textfile	45753117	8.65366e-11	0.0738	21	36052	ebi-a-GCST004692	|| id:ebi-a-GCST004692	TRUE	reported	igd	1	TRUE	NA	NA	0.00116574	36052	9.30132e-07	8812	TRUE	0.00522738	42.074
53	rs78549703	A	G	A	G	0.1095	-0.0072	NA	NA	FALSE	FALSE	FALSE	qUs7G3	0.0145	0.62	11343	90274814	TRUE	reported	textfile	17749542	1.305e-08	0.0193	19	36052	ebi-a-GCST004692	|| id:ebi-a-GCST004692	TRUE	reported	igd	1	TRUE	NA	NA	0.000892115	36052	2.17404e-05	11343	TRUE	0.019187	32.1895
54	rs10463311	T	C	T	C	-0.0854	0.0038	0.7441	NA	FALSE	FALSE	FALSE	qUs7G3	0.0151	0.801	11787	90274814	TRUE	reported	textfile	150410835	3.99899e-08	0.0156	5	80610	ebi-a-GCST005647	|| id:ebi-a-GCST005647	TRUE	reported	igd	1	TRUE	NA	NA	0.000371644	80610	5.3738e-06	11787	TRUE	0.0854509	29.9686
55	rs117204439	C	T	C	T	0.4645	-0.0931	0.0238	NA	FALSE	FALSE	FALSE	qUs7G3	0.0645	0.149	9361	90274814	TRUE	reported	textfile	27607973	3.08319e-14	0.0612	9	80610	ebi-a-GCST005647	|| id:ebi-a-GCST005647	TRUE	reported	igd	1	TRUE	NA	NA	0.000714135	80610	0.000222563	9361	TRUE	0.279514	57.6061
56	rs12973192	G	C	G	C	0.1205	-0.0087	0.3247	NA	FALSE	TRUE	TRUE	qUs7G3	0.0145	0.549	11344	90274814	TRUE	reported	textfile	17753239	3.91562e-15	0.0153	19	80610	ebi-a-GCST005647	|| id:ebi-a-GCST005647	TRUE	reported	igd	1	TRUE	NA	NA	0.000768916	80610	3.17394e-05	11344	TRUE	0.027534	62.0285
57	rs142321490	C	G	C	G	0.3172	-0.0652	0.0183	NA	FALSE	TRUE	TRUE	qUs7G3	0.0529	0.218	9908	90274814	TRUE	reported	textfile	58676132	6.14695e-10	0.0513	12	80610	ebi-a-GCST005647	|| id:ebi-a-GCST005647	TRUE	reported	igd	1	TRUE	NA	NA	0.000474076	80610	0.000153327	9908	TRUE	0.377643	38.2324
58	rs3849943	T	C	T	C	-0.1764	-0.0003	0.7518	NA	FALSE	FALSE	FALSE	qUs7G3	0.0154	0.984	11792	90274814	TRUE	reported	textfile	27543382	3.76964e-30	0.0155	9	80610	ebi-a-GCST005647	|| id:ebi-a-GCST005647	TRUE	reported	igd	1	TRUE	NA	NA	0.0016042	80610	3.21875e-08	11792	TRUE	5.21307e-05	129.519
59	rs74654358	A	G	A	G	0.1976	0.0374	0.0473	NA	FALSE	FALSE	FALSE	qUs7G3	0.0298	0.209	11785	90274814	TRUE	reported	textfile	64881967	4.65801e-09	0.0337	12	80610	ebi-a-GCST005647	|| id:ebi-a-GCST005647	TRUE	reported	igd	1	TRUE	NA	NA	0.000426335	80610	0.000133659	11785	TRUE	0.356771	34.3806
60	rs75087725	A	C	A	C	0.5145	-0.0064	0.0153	NA	FALSE	FALSE	FALSE	qUs7G3	0.0707	0.928	8812	90274814	TRUE	reported	textfile	45753117	1.84799e-14	0.0672	21	80610	ebi-a-GCST005647	|| id:ebi-a-GCST005647	TRUE	reported	igd	1	TRUE	NA	NA	0.000726672	80610	9.30132e-07	8812	TRUE	0.0205119	58.6182
61	rs117204439	C	T	C	T	0.4248	-0.0562	NA	NA	FALSE	FALSE	FALSE	dEXWmN	0.0645	0.384	9353	90274820	TRUE	reported	textfile	27607973	3.08198e-10	0.0675	9	36052	ebi-a-GCST004692	|| id:ebi-a-GCST004692	TRUE	reported	igd	1	TRUE	NA	NA	0.00109744	36052	8.1182e-05	9353	TRUE	0.0376084	39.606
62	rs35714695	A	G	A	G	-0.1344	0.0153	NA	NA	FALSE	FALSE	FALSE	dEXWmN	0.0163	0.348	11781	90274820	TRUE	reported	textfile	26719788	1.286e-08	0.0236	17	36052	ebi-a-GCST004692	|| id:ebi-a-GCST004692	TRUE	reported	igd	1	TRUE	NA	NA	0.000898832	36052	7.4794e-05	11781	TRUE	0.0443511	32.4321
63	rs3849943	T	C	T	C	-0.1808	0.0119	NA	NA	FALSE	FALSE	FALSE	dEXWmN	0.0144	0.409	11784	90274820	TRUE	reported	textfile	27543382	3.98474e-19	0.0202	9	36052	ebi-a-GCST004692	|| id:ebi-a-GCST004692	TRUE	reported	igd	1	TRUE	NA	NA	0.0022173	36052	5.79595e-05	11784	TRUE	0.000196873	80.1114
64	rs75087725	A	C	A	C	0.4787	-0.1033	NA	NA	FALSE	FALSE	FALSE	dEXWmN	0.0707	0.144	8803	90274820	TRUE	reported	textfile	45753117	8.65366e-11	0.0738	21	36052	ebi-a-GCST004692	|| id:ebi-a-GCST004692	TRUE	reported	igd	1	TRUE	NA	NA	0.00116574	36052	0.000242507	8803	TRUE	0.118092	42.074
65	rs78549703	A	G	A	G	0.1095	-0.0268	NA	NA	FALSE	FALSE	FALSE	dEXWmN	0.0146	0.0664	11335	90274820	TRUE	reported	textfile	17749542	1.305e-08	0.0193	19	36052	ebi-a-GCST004692	|| id:ebi-a-GCST004692	TRUE	reported	igd	1	TRUE	NA	NA	0.000892115	36052	0.000297228	11335	TRUE	0.240708	32.1895
66	rs10463311	T	C	T	C	-0.0854	-0.0209	0.7441	NA	FALSE	FALSE	FALSE	dEXWmN	0.014	0.135	11779	90274820	TRUE	reported	textfile	150410835	3.99899e-08	0.0156	5	80610	ebi-a-GCST005647	|| id:ebi-a-GCST005647	TRUE	reported	igd	1	TRUE	NA	NA	0.000371644	80610	0.000189199	11779	TRUE	0.575477	29.9686
67	rs117204439	C	T	C	T	0.4645	-0.0562	0.0238	NA	FALSE	FALSE	FALSE	dEXWmN	0.0645	0.384	9353	90274820	TRUE	reported	textfile	27607973	3.08319e-14	0.0612	9	80610	ebi-a-GCST005647	|| id:ebi-a-GCST005647	TRUE	reported	igd	1	TRUE	NA	NA	0.000714135	80610	8.1182e-05	9353	TRUE	0.104827	57.6061
68	rs12973192	G	C	G	C	0.1205	-0.0238	0.3247	NA	FALSE	TRUE	TRUE	dEXWmN	0.0145	0.101	11336	90274820	TRUE	reported	textfile	17753239	3.91562e-15	0.0153	19	80610	ebi-a-GCST005647	|| id:ebi-a-GCST005647	TRUE	reported	igd	1	TRUE	NA	NA	0.000768916	80610	0.000237647	11336	TRUE	0.219448	62.0285
69	rs142321490	C	G	C	G	0.3172	0.0465	0.0183	NA	FALSE	TRUE	TRUE	dEXWmN	0.0487	0.34	9900	90274820	TRUE	reported	textfile	58676132	6.14695e-10	0.0513	12	80610	ebi-a-GCST005647	|| id:ebi-a-GCST005647	TRUE	reported	igd	1	TRUE	NA	NA	0.000474076	80610	9.21002e-05	9900	TRUE	0.252832	38.2324
70	rs3849943	T	C	T	C	-0.1764	0.0119	0.7518	NA	FALSE	FALSE	FALSE	dEXWmN	0.0144	0.409	11784	90274820	TRUE	reported	textfile	27543382	3.76964e-30	0.0155	9	80610	ebi-a-GCST005647	|| id:ebi-a-GCST005647	TRUE	reported	igd	1	TRUE	NA	NA	0.0016042	80610	5.79595e-05	11784	TRUE	0.000998351	129.519
71	rs74654358	A	G	A	G	0.1976	-0.0013	0.0473	NA	FALSE	FALSE	FALSE	dEXWmN	0.0278	0.963	11777	90274820	TRUE	reported	textfile	64881967	4.65801e-09	0.0337	12	80610	ebi-a-GCST005647	|| id:ebi-a-GCST005647	TRUE	reported	igd	1	TRUE	NA	NA	0.000426335	80610	1.8571e-07	11777	TRUE	0.040419	34.3806
72	rs75087725	A	C	A	C	0.5145	-0.1033	0.0153	NA	FALSE	FALSE	FALSE	dEXWmN	0.0707	0.144	8803	90274820	TRUE	reported	textfile	45753117	1.84799e-14	0.0672	21	80610	ebi-a-GCST005647	|| id:ebi-a-GCST005647	TRUE	reported	igd	1	TRUE	NA	NA	0.000726672	80610	0.000242507	8803	TRUE	0.310351	58.6182
73	rs117204439	C	T	C	T	0.4248	0.04	NA	NA	FALSE	FALSE	FALSE	1mfllr	0.0645	0.535	9360	90274828	TRUE	reported	textfile	27607973	3.08198e-10	0.0675	9	36052	ebi-a-GCST004692	|| id:ebi-a-GCST004692	TRUE	reported	igd	1	TRUE	NA	NA	0.00109744	36052	4.1096e-05	9360	TRUE	0.021235	39.606
74	rs35714695	A	G	A	G	-0.1344	-0.0121	NA	NA	FALSE	FALSE	FALSE	1mfllr	0.0171	0.479	11788	90274828	TRUE	reported	textfile	26719788	1.286e-08	0.0236	17	36052	ebi-a-GCST004692	|| id:ebi-a-GCST004692	TRUE	reported	igd	1	TRUE	NA	NA	0.000898832	36052	4.24809e-05	11788	TRUE	0.0269658	32.4321
75	rs3849943	T	C	T	C	-0.1808	-0.0311	NA	NA	FALSE	FALSE	FALSE	1mfllr	0.0151	0.0394	11791	90274828	TRUE	reported	textfile	27543382	3.98474e-19	0.0202	9	36052	ebi-a-GCST004692	|| id:ebi-a-GCST004692	TRUE	reported	igd	1	TRUE	NA	NA	0.0022173	36052	0.000359694	11791	TRUE	0.00796269	80.1114
76	rs75087725	A	C	A	C	0.4787	0.0118	NA	NA	FALSE	FALSE	FALSE	1mfllr	0.0707	0.867	8811	90274828	TRUE	reported	textfile	45753117	8.65366e-11	0.0738	21	36052	ebi-a-GCST004692	|| id:ebi-a-GCST004692	TRUE	reported	igd	1	TRUE	NA	NA	0.00116574	36052	3.16226e-06	8811	TRUE	0.00644812	42.074
77	rs78549703	A	G	A	G	0.1095	-0.0026	NA	NA	FALSE	FALSE	FALSE	1mfllr	0.0145	0.858	11342	90274828	TRUE	reported	textfile	17749542	1.305e-08	0.0193	19	36052	ebi-a-GCST004692	|| id:ebi-a-GCST004692	TRUE	reported	igd	1	TRUE	NA	NA	0.000892115	36052	2.83528e-06	11342	TRUE	0.00883269	32.1895
78	rs10463311	T	C	T	C	-0.0854	-0.0072	0.7441	NA	FALSE	FALSE	FALSE	1mfllr	0.0147	0.624	11786	90274828	TRUE	reported	textfile	150410835	3.99899e-08	0.0156	5	80610	ebi-a-GCST005647	|| id:ebi-a-GCST005647	TRUE	reported	igd	1	TRUE	NA	NA	0.000371644	80610	2.03577e-05	11786	TRUE	0.13429	29.9686
79	rs117204439	C	T	C	T	0.4645	0.04	0.0238	NA	FALSE	FALSE	FALSE	1mfllr	0.0645	0.535	9360	90274828	TRUE	reported	textfile	27607973	3.08319e-14	0.0612	9	80610	ebi-a-GCST005647	|| id:ebi-a-GCST005647	TRUE	reported	igd	1	TRUE	NA	NA	0.000714135	80610	4.1096e-05	9360	TRUE	0.0628196	57.6061
[truncated: 65 more rows]
